# Supplementary material for: Tracking multiple conformations occurring on angstrom-and-millisecond scales in single amino-acid-transporter molecules
Source: eLife. 2023 Feb 17;12:e82175. doi: 10.7554/eLife.82175 (PMC9937647; doi:10.7554/eLife.82175)
Supplement: Figure 1—figure supplement 1—source data 1. [file elife-82175-fig1-figsupp1-data1.xlsx]

## Sheet: Sheet1
With C188 C195 Mutations				without C188 C195 mutations				ITC data
superose 6				superdex 200				molar ratio	Normalized heat change (cal/mol)	fit of data
Elution Volume (ml)	Normalized A280	Normalized A550*5		Elution Volume (ml)	Normalized A280	Normalized A550*5		0.07114		935.785
5.99995	0.000235849	0.00159253		5.99921	0.00249299	0.00245294		0.42899	898.664	829.004
6.02655	0.000272218	0.00232543		6.02581	0.00238286	0.00675811		0.79036	627.581	655.002
6.05314	0.000263402	0.00252932		6.05241	0.00170204	0.00430517		1.15528	437.686	501.595
6.07973	0.000278831	0.00235849		6.079	0.00124149	0		1.52372	351.885	378.948
6.10632	0.000282137	0.00191214		6.1056	0.00114137	-0.00310372		1.89571	243.144	286.749
6.13292	0.000281035	0.00207746		6.1322	0.000991189	-0.00160192		2.27123	224.278	219.411
6.15951	0.000341651	0.00216011		6.15879	0.000921105	-0.000350421		2.65029	189.133	170.532
6.1861	0.000253483	0.00210501		6.18539	0.00145174	0.000851021		3.03288	143.305	134.805
6.21269	0.000198378	0.00227032		6.21199	0.00156187	-0.00145174		3.41901	116.881	108.334
6.23929	0.000158702	0.00265055		6.23858	0.00176211	0.0020024		3.80868	98.3246	88.403
6.26588	0.000156498	0.0024136		6.26518	0.00202243	0.00545655		4.20188	91.8857	73.1425
6.29247	0.000163111	0.00208848		6.29178	0.0010012	0.0002503		4.59861	71.7761	61.2678
6.31906	0.000167519	0.00187908		6.31837	0.00123148	-0.00170204		4.99889	91.7751	51.8862
6.34566	0.000153192	0.00208297		6.34497	0.00202243	5.00601e-05		5.4027	83.5374	44.3695
6.37225	0.000173029	0.00261748		6.37157	0.0010813	0.00195234		5.81004	70.248	38.2693
6.39884	0.000132252	0.00224277		6.39816	0.000810973	0.00510613		6.22092	56.3916	33.26
6.42543	0.000196174	0.00233094		6.42476	0.000951141	0.00190228
6.45203	0.000202786	0.00259544		6.45136	0.000380457	0.00245294
6.47862	0.000153192	0.00279382		6.47795	0.000770925	0.00690829
6.50521	0.000163111	0.00229236		6.50455	0.000530637	0.00420505
6.5318	0.000123435	0.0023089		6.53115	0.000630757	0.00540649
6.5584	8.15553e-05	0.00209399		6.55774	0.000570685	0.00510613
6.58499	8.70658e-05	0.00147681		6.58434	0.000390469	0.00450541
6.61158	1.98378e-05	0.00198929		6.61094	0.000470565	0.00480577
6.63817	2.64504e-05	0.00209399		6.63753	-3.0036e-05	0.00195234
6.66477	8.04532e-05	0.00158151		6.66413	0.000480577	0.00285342
6.69136	4.73902e-05	0.0013666		6.69073	0.000820985	0.00260312
6.71795	1.65315e-05	0.00148783		6.71732	0.000570685	0.00230276
6.74455	2.64504e-05	0.00168621		6.74392	0.00030036	0.002503
6.77114	4.40839e-06	0.00182948		6.77052	0.000570685	0.00370445
6.79773	3.3063e-06	0.00158702		6.79711	0.000690829	0.00415499
6.82432	0.000121231	0.00169723		6.82371	0.000380457	0.00405487
6.85092	0.000274423	0.00150987		6.85031	0.00101121	0.00780937
6.87751	0.000263402	0.00160355		6.8769	0.00120144	0.00510613
6.9041	0.000212705	0.00146028		6.9035	0.00015018	0.00360433
6.93069	0.00026781	0.00190663		6.9301	8.00961e-05	0.00210252
6.95729	0.000307485	0.00229236		6.95669	0.000140168	0.00465559
6.98388	0.000393449	0.0025734		6.98329	5.00601e-05	0.00265318
7.01047	0.000509169	0.00247421		7.00989	0.000470565	0.00265318
7.03706	0.00065134	0.00316302		7.03648	0.000160192	0.00590709
7.06366	0.000795715	0.00297016		7.06308	0.000420505	0.00810973
7.09025	0.000929069	0.00253483		7.08968	0.000290348	0.00615739
7.11684	0.00115279	0.00276076		7.11627	0.000720865	0.00370445
7.14343	0.00136991	0.00294811		7.14287	0.000670805	0.00615739
7.17003	0.00159914	0.00386285		7.16947	0.000650781	0.00260312
7.19662	0.00191104	0.0045186		7.19606	0.00020024	0.00540649
7.22321	0.00236951	0.00506965		7.22266	0.00020024	0.00455547
7.2498	0.00284011	0.00555458		7.24926	8.00961e-05	0.00625751
7.2764	0.00353223	0.00617175		7.27585	0.000740889	0.0117641
7.30299	0.00443815	0.00700384		7.30245	0.00197237	0.0105126
7.32958	0.0056174	0.00878372		7.32905	0.00118142	0.00841009
7.35617	0.00716915	0.0109273		7.35564	0.000871045	0.00765919
7.38277	0.00925873	0.0134952		7.38224	0.000610733	0.00410493
7.40936	0.0121826	0.0169282		7.40884	0.000891069	0.00590709
7.43595	0.016127	0.0218546		7.43543	0.000790949	0.0139668
7.46254	0.021179	0.0284837		7.46203	0.000770925	0.00926111
7.48914	0.0277134	0.0375375		7.48863	0.00147177	0.00876051
7.51573	0.0359604	0.0474013		7.51522	0.00173208	0.0126151
7.54232	0.0458396	0.0596235		7.54182	0.00141169	0.0130156
7.56892	0.0574777	0.0742869		7.56842	0.00173208	0.0117141
7.59551	0.0714215	0.091116		7.59501	0.00190228	0.0105126
7.6221	0.0870691	0.110441		7.62161	0.00194233	0.00991189
7.64869	0.104675	0.132533		7.64821	0.0020825	0.0134662
7.67529	0.124226	0.156371		7.6748	0.00228274	0.0174209
7.70188	0.145694	0.181835		7.7014	0.00164197	0.012515
7.72847	0.168272	0.208462		7.728	0.00185222	0.00695835
7.75506	0.191634	0.236268		7.75459	0.00180216	0.0113136
7.78166	0.216394	0.264101		7.78119	0.00187225	0.0128654
7.80825	0.240687	0.291533		7.80779	0.00234281	0.0122647
7.83484	0.264678	0.318551		7.83438	0.00278334	0.0103624
7.86143	0.28768	0.342868		7.86098	0.00318382	0.010863
7.88803	0.309626	0.363748		7.88758	0.00277333	0.00891069
7.91462	0.329478	0.38272		7.91417	0.00303364	0.0104125
7.94121	0.347604	0.398342		7.94077	0.0034141	0.0134662
7.9678	0.363803	0.409071		7.96737	0.0038346	0.0142671
7.9944	0.377836	0.417497		7.99396	0.00455547	0.0129155
8.02099	0.39002	0.423002		8.02056	0.0049159	0.0136664
8.04758	0.400797	0.424561		8.04716	0.00542651	0.014968
8.07417	0.410662	0.424374		8.07375	0.00584702	0.0128154
8.10077	0.419428	0.423272		8.10035	0.00594714	0.0122147
8.12736	0.427626	0.420676		8.12695	0.00597717	0.0116139
8.15395	0.435266	0.417161		8.15354	0.00701842	0.0173708
8.18054	0.442272	0.412819		8.18014	0.00778935	0.0168202
8.20714	0.448196	0.407876		8.20674	0.00841009	0.0170705
8.23373	0.453288	0.403335		8.23333	0.00942131	0.014167
8.26032	0.457507	0.398679		8.25993	0.0101522	0.0194734
8.28692	0.460342	0.39367		8.28653	0.0105827	0.0185222
8.31351	0.461672	0.387492		8.31312	0.011684	0.0259311
8.3401	0.460925	0.380692		8.33972	0.0130056	0.0287845
8.36669	0.458214	0.373226		8.36632	0.0131958	0.0229275
8.39329	0.453977	0.365373		8.39291	0.0134561	0.0193732
8.41988	0.448059	0.356022		8.41951	0.0143372	0.0230777
8.44647	0.440034	0.346946		8.44611	0.0148078	0.0205747
8.47306	0.430175	0.336708		8.4727	0.0150981	0.0193232
8.49966	0.418811	0.324832		8.4993	0.0165999	0.0188726
8.52625	0.406113	0.313982		8.5259	0.0171306	0.0209752
8.55284	0.391859	0.302284		8.55249	0.0180216	0.0211754
8.57943	0.376893	0.289885		8.57909	0.0195034	0.0263817
8.60603	0.361247	0.277519		8.60569	0.0203544	0.0292851
8.63262	0.345211	0.265259		8.63228	0.0206247	0.0271826
8.65921	0.329142	0.253141		8.65888	0.0212956	0.0230276
8.6858	0.313279	0.240522		8.68548	0.022497	0.0235783
8.7124	0.297778	0.229242		8.71207	0.0235282	0.0240789
8.73899	0.282478	0.217824		8.73867	0.0247998	0.0231778
8.76558	0.26813	0.207156		8.76527	0.0263616	0.02498
8.79217	0.254675	0.197028		8.79186	0.0287946	0.0237785
8.81877	0.241867	0.187114		8.81846	0.0314477	0.026632
8.84536	0.229704	0.17822		8.84506	0.0329796	0.0287345
8.87195	0.21865	0.169514		8.87165	0.0360132	0.0220765
8.89854	0.208361	0.161981		8.89825	0.0388967	0.0249299
8.92514	0.198889	0.155131		8.92485	0.0420705	0.0278835
8.95173	0.190224	0.148976		8.95144	0.0455246	0.0288346
8.97832	0.182344	0.14324		8.97804	0.0489588	0.0321386
9.00491	0.175325	0.138021		9.00464	0.053344	0.0346916
9.03151	0.16865	0.133156		9.03123	0.057469	0.0354926
9.0581	0.162769	0.128813		9.05783	0.061664	0.0351922
9.08469	0.157469	0.125011		9.08443	0.06669	0.0329395
9.11129	0.152516	0.122068		9.11102	0.0718262	0.0345915
9.13788	0.148199	0.118487		9.13762	0.0772928	0.0394974
9.16447	0.144201	0.11577		9.16422	0.0823789	0.039147
9.19106	0.140608	0.11259		9.19081	0.0879555	0.0408991
9.21766	0.137229	0.10983		9.21741	0.0942531	0.0402984
9.24425	0.134226	0.107719		9.24401	0.0999099	0.0386464
9.27084	0.131603	0.105498		9.2706	0.106318	0.046706
9.29743	0.12933	0.104457		9.2972	0.113416	0.0514117
9.32403	0.127184	0.103041		9.3238	0.119664	0.0519624
9.35062	0.125151	0.101338		9.35039	0.124209	0.0468562
9.37721	0.123425	0.100131		9.37699	0.129335	0.0495595
9.4038	0.12185	0.0991448		9.40359	0.136193	0.0517621
9.4304	0.120417	0.0977341		9.43018	0.142211	0.0515118
9.45699	0.119228	0.0965714		9.45678	0.147497	0.0498598
9.48358	0.118212	0.0955795		9.48338	0.151862	0.0506107
9.51017	0.117306	0.0951827		9.50997	0.156988	0.0537145
9.53677	0.116476	0.0947033		9.53657	0.161404	0.0522627
9.56336	0.115823	0.0938547		9.56317	0.165749	0.0479075
9.58995	0.115259	0.0930612		9.58976	0.169143	0.0465058
9.61654	0.114822	0.092725		9.61636	0.172667	0.0490088
9.64314	0.114628	0.0925873		9.64296	0.176372	0.0506608
9.66973	0.114472	0.0926644		9.66955	0.179866	0.0538646
9.69632	0.114228	0.0923779		9.69615	0.182489	0.0515619
9.72291	0.114206	0.0913805		9.72275	0.184231	0.049159
9.74951	0.114251	0.0905319		9.74934	0.186103	0.0451041
9.7761	0.114436	0.091645		9.77594	0.188616	0.0472066
9.80269	0.114764	0.0913584		9.80254	0.191249	0.0482078
9.82929	0.115009	0.0907743		9.82913	0.193262	0.0490088
9.85588	0.115336	0.0915623		9.85573	0.195364	0.0404986
9.88247	0.115797	0.091645		9.88233	0.197607	0.0436524
9.90906	0.116179	0.0906862		9.90892	0.199519	0.0417
9.93566	0.116667	0.090879		9.93552	0.201802	0.0396476
9.96225	0.117324	0.0910223		9.96212	0.203144	0.0376952
9.98884	0.117982	0.091105		9.98871	0.205336	0.0363937
10.0154	0.118624	0.0913144		10.0153	0.20814	0.0359932
10.042	0.119383	0.0914852		10.0419	0.210423	0.0359932
10.0686	0.120155	0.0919426		10.0685	0.212475	0.0352423
10.0952	0.120971	0.092196		10.0951	0.215028	0.036644
10.1218	0.121764	0.0918709		10.1217	0.217651	0.0378454
10.1484	0.122637	0.0919205		10.1483	0.220344	0.038296
10.175	0.123525	0.092422		10.1749	0.222587	0.0393973
10.2016	0.124421	0.0929234		10.2015	0.22518	0.0376452
10.2282	0.125414	0.0930502		10.2281	0.228955	0.0377954
10.2548	0.126364	0.0930226		10.2547	0.232199	0.0386464
10.2814	0.1274	0.0938933		10.2813	0.236854	0.0384461
10.308	0.128414	0.094301		10.3079	0.240769	0.035843
10.3345	0.129348	0.094301		10.3345	0.242471	0.0332399
10.3611	0.130444	0.0941192		10.3611	0.246546	0.0332399
10.3877	0.131546	0.0942294		10.3877	0.251982	0.034992
10.4143	0.132571	0.0944664		10.4143	0.256308	0.0359431
10.4409	0.133594	0.0950229		10.4409	0.260563	0.0363937
10.4675	0.134762	0.0951827		10.4675	0.265258	0.0328394
10.4941	0.135872	0.0952544		10.4941	0.270915	0.0353925
10.5207	0.137007	0.0958936		10.5206	0.276322	0.0329395
10.5473	0.138259	0.095855		10.5472	0.28296	0.0312375
10.5739	0.139446	0.0957172		10.5738	0.289838	0.0328394
10.6005	0.140656	0.0963179		10.6004	0.296205	0.0318883
10.6271	0.141827	0.0971445		10.627	0.303114	0.0313376
10.6537	0.143074	0.0973814		10.6536	0.311053	0.0303865
10.6802	0.144351	0.0973373		10.6802	0.319283	0.0259812
10.7068	0.145565	0.0975467		10.7068	0.328024	0.0252803
10.7334	0.146859	0.0977176		10.7334	0.336524	0.029185
10.76	0.148159	0.0983623		10.76	0.347297	0.0324389
10.7866	0.149431	0.098985		10.7866	0.357749	0.0343913
10.8132	0.150671	0.099266		10.8132	0.367601	0.0338406
10.8398	0.152026	0.0995636		10.8398	0.379596	0.0347918
10.8664	0.153313	0.100037		10.8664	0.39144	0.0402984
10.893	0.154648	0.100164		10.893	0.403584	0.0345915
10.9196	0.155951	0.100269		10.9196	0.41634	0.0337905
10.9462	0.157305	0.100622		10.9462	0.430036	0.0337905
10.9728	0.15868	0.101349		10.9728	0.444013	0.0345915
10.9994	0.160049	0.101465		10.9994	0.458841	0.0336404
11.026	0.161433	0.102076		11.026	0.474099	0.0317381
11.0525	0.162777	0.102556		11.0526	0.490128	0.0297357
11.0791	0.164163	0.102583		11.0792	0.506438	0.0306368
11.1057	0.165751	0.103443		11.1058	0.523118	0.0314377
11.1323	0.167365	0.10417		11.1324	0.54144	0.0303364
11.1589	0.168807	0.104462		11.159	0.559091	0.0315378
11.1855	0.170315	0.105162		11.1856	0.578074	0.0304866
11.2121	0.171826	0.105829		11.2122	0.597447	0.0340909
11.2387	0.173388	0.106584		11.2388	0.615208	0.034191
11.2653	0.175138	0.107857		11.2654	0.634852	0.0359431
11.2919	0.176839	0.108358		11.292	0.654656	0.0335402
11.3185	0.178472	0.108496		11.3185	0.67533	0.0292351
11.3451	0.180363	0.109119		11.3451	0.695485	0.0285342
11.3717	0.182182	0.110237		11.3717	0.715388	0.0275831
11.3982	0.184075	0.111047		11.3983	0.736133	0.0285843
11.4248	0.185937	0.11194		11.4249	0.756738	0.0313877
11.4514	0.187785	0.113064		11.4515	0.776422	0.0309872
11.478	0.189873	0.113753		11.4781	0.796476	0.0287845
11.5046	0.191987	0.114591		11.5047	0.815579	0.0299359
11.5312	0.193997	0.115009		11.5313	0.835342	0.0294353
11.5578	0.195932	0.115654		11.5579	0.855256	0.0310372
11.5844	0.198063	0.116591		11.5845	0.873078	0.0318883
11.611	0.200368	0.117456		11.6111	0.89164	0.0315879
11.6376	0.202649	0.118321		11.6377	0.909581	0.0318382
11.6642	0.204795	0.119412		11.6643	0.92526	0.0303865
11.6908	0.206901	0.120564		11.6909	0.940999	0.0312375
11.7174	0.209318	0.12117		11.7175	0.956418	0.0314878
11.744	0.211821	0.122427		11.7441	0.970214	0.0297857
11.7705	0.214204	0.123518		11.7707	0.98341	0.0264818
11.7971	0.21663	0.12424		11.7973	0.994974	0.0240288
11.8237	0.219163	0.125391		11.8239	1.00543	0.0238787
11.8503	0.221728	0.1264		11.8505	1.01557	0.0269323
11.8769	0.224183	0.127667		11.8771	1.02401	0.0228274
11.9035	0.226728	0.128273		11.9037	1.03114	0.0210753
11.9301	0.229318	0.12948		11.9303	1.03771	0.024129
11.9567	0.231833	0.130318		11.9569	1.04207	0.0191229
11.9833	0.234477	0.131227		11.9835	1.04567	0.0226772
12.0099	0.237205	0.13277		12.0101	1.04784	0.0213256
12.0365	0.239788	0.13407		12.0367	1.04818	0.0168702
12.0631	0.242357	0.135112		12.0633	1.04743	0.0187225
12.0897	0.245161	0.136726		12.0899	1.0448	0.0195735
12.1162	0.24785	0.138176		12.1164	1.04121	0.0181217
12.1428	0.25057	0.138804		12.143	1.03667	0.0172207
12.1694	0.253258	0.140005		12.1696	1.02994	0.0104626
12.196	0.255977	0.141019		12.1962	1.02244	0.00956147
12.2226	0.258827	0.142551		12.2228	1.01408	0.010813
12.2492	0.261562	0.14389		12.2494	1.00383	0.00951141
12.2758	0.264381	0.145146		12.276	0.99205	0.00540649
12.3024	0.267292	0.146689		12.3026	0.980246	0.00395475
12.329	0.270133	0.148227		12.3292	0.967091	0.00355427
12.3556	0.272891	0.149869		12.3558	0.952313	0.00220264
12.3822	0.275905	0.151555		12.3824	0.935613	0.00160192
12.4088	0.278826	0.152867		12.409	0.919614	0.000650781
12.4354	0.281729	0.154035		12.4356	0.904075	-0.00115138
12.462	0.284728	0.155688		12.4622	0.885783	-0.00435523
12.4885	0.287726	0.157236		12.4888	0.867251	-0.00260312
12.5151	0.290859	0.158851		12.5154	0.847998	-0.00105126
12.5417	0.293866	0.160477		12.542	0.827954	-0.00345414
12.5683	0.297001	0.162301		12.5686	0.808881	-0.00660793
12.5949	0.300207	0.163959		12.5952	0.787215	-0.00710853
12.6215	0.303374	0.165954		12.6218	0.76628	-0.0110633
12.6481	0.306527	0.167188		12.6484	0.745475	-0.0139167
12.6747	0.309662	0.168147		12.675	0.723678	-0.0143672
12.7013	0.313005	0.170539		12.7016	0.702403	-0.0119143
12.7279	0.316545	0.173167		12.7282	0.681748	-0.00820985
12.7545	0.319845	0.174451		12.7548	0.659321	-0.0139668
12.7811	0.323242	0.176402		12.7814	0.636504	-0.0201742
12.8077	0.326842	0.177917		12.808	0.614758	-0.0197737
12.8342	0.330324	0.179967		12.8346	0.593232	-0.0221266
12.8608	0.333905	0.182072		12.8612	0.572036	-0.0221266
12.8874	0.337496	0.18432		12.8878	0.54985	-0.0236284
12.914	0.341109	0.186508		12.9143	0.529245	-0.0235282
12.9406	0.344803	0.188271		12.9409	0.50862	-0.026632
12.9672	0.348506	0.190239		12.9675	0.487715	-0.0282339
12.9938	0.352232	0.192393		12.9941	0.467972	-0.0290849
13.0204	0.356174	0.194592		13.0207	0.448368	-0.0288346
13.047	0.360248	0.197072		13.0473	0.429295	-0.0288847
13.0736	0.364123	0.199292		13.0739	0.410302	-0.0302863
13.1002	0.368016	0.201557		13.1005	0.39146	-0.0330396
13.1268	0.371971	0.204092		13.1271	0.373718	-0.0326392
13.1534	0.376115	0.206506		13.1537	0.356107	-0.0355927
13.18	0.380426	0.208726		13.1803	0.339618	-0.0397477
13.2065	0.385006	0.211157		13.2069	0.323809	-0.034191
13.2331	0.389434	0.214253		13.2335	0.307669	-0.0343412
13.2597	0.393645	0.21686		13.2601	0.29198	-0.0405987
13.2863	0.398291	0.219538		13.2867	0.277303	-0.0392972
13.3129	0.403077	0.221726		13.3133	0.262375	-0.0379455
13.3395	0.407829	0.224657		13.3399	0.249159	-0.0405987
13.3661	0.412742	0.228112		13.3665	0.236794	-0.0402984
13.3927	0.417733	0.230779		13.3931	0.223688	-0.0380457
13.4193	0.422797	0.233805		13.4197	0.211534	-0.0371946
13.4459	0.428148	0.236505		13.4463	0.200471	-0.0411994
13.4725	0.433492	0.239519		13.4729	0.189788	-0.0439527
13.4991	0.438986	0.242126		13.4995	0.178925	-0.0426011
13.5257	0.444615	0.244969		13.5261	0.168522	-0.0450541
13.5522	0.450361	0.248793		13.5527	0.15854	-0.047507
13.5788	0.456357	0.252204		13.5793	0.149369	-0.047507
13.6054	0.462363	0.25524		13.6059	0.140248	-0.0474569
13.632	0.468649	0.258299		13.6325	0.131788	-0.047507
13.6586	0.474922	0.261495		13.6591	0.123959	-0.0469063
13.6852	0.481423	0.265749		13.6857	0.11696	-0.0439027
13.7118	0.488126	0.26981		13.7122	0.110423	-0.0359431
13.7384	0.494814	0.273403		13.7388	0.103064	-0.0427513
13.765	0.501719	0.276445		13.7654	0.0967261	-0.0496095
13.7916	0.50882	0.279547		13.792	0.0910593	-0.0459551
13.8182	0.516183	0.28325		13.8186	0.085803	-0.0390469
13.8448	0.523788	0.286832		13.8452	0.0806968	-0.036644
13.8714	0.531365	0.29075		13.8718	0.0753204	-0.0381958
13.898	0.538988	0.29453		13.8984	0.0712655	-0.0350921
13.9245	0.547205	0.298685		13.925	0.0670805	-0.0354926
13.9511	0.555267	0.30273		13.9516	0.0629455	-0.0440028
13.9777	0.563483	0.30737		13.9782	0.05833	-0.0398979
14.0043	0.571924	0.311133		14.0048	0.0544654	-0.0376952
14.0309	0.580596	0.315305		14.0314	0.0518122	-0.0359431
14.0575	0.589414	0.319884		14.058	0.0485282	-0.034992
14.0841	0.598178	0.323973		14.0846	0.0452843	-0.0343913
14.1107	0.607271	0.327902		14.1112	0.0423308	-0.0328895
14.1373	0.616334	0.332239		14.1378	0.0397877	-0.0359932
14.1639	0.625475	0.336531		14.1644	0.0372147	-0.0354425
14.1905	0.635371	0.340653		14.191	0.0355026	-0.0344413
14.2171	0.645184	0.345287		14.2176	0.03336	-0.0301862
14.2437	0.654624	0.349734		14.2442	0.0304766	-0.0304866
14.2702	0.664596	0.354033		14.2708	0.0281137	-0.0323889
14.2968	0.674656	0.358408		14.2974	0.0263116	-0.0322387
14.3234	0.684718	0.362546		14.324	0.0249099	-0.0326392
14.35	0.694724	0.367666		14.3506	0.0235182	-0.0283841
14.3766	0.704944	0.372267		14.3772	0.0217161	-0.029135
14.4032	0.715607	0.376741		14.4038	0.0200841	-0.0327893
14.4298	0.726025	0.380659		14.4304	0.0184722	-0.0323388
14.4564	0.736593	0.385321		14.457	0.0178414	-0.0308871
14.483	0.747103	0.389443		14.4836	0.0160092	-0.0301362
14.5096	0.757689	0.394116		14.5101	0.0148278	-0.029986
14.5362	0.768636	0.398618		14.5367	0.0144373	-0.0267821
14.5628	0.778998	0.40296		14.5633	0.013366	-0.0244293
14.5894	0.789698	0.406845		14.5899	0.0117641	-0.0292351
14.616	0.800003	0.410466		14.6165	0.0107629	-0.0307369
14.6425	0.810431	0.414714		14.6431	0.0107529	-0.0292851
14.6691	0.821231	0.419492		14.6697	0.0103925	-0.0229776
14.6957	0.831807	0.424049		14.6963	0.00959151	-0.0153684
14.7223	0.841657	0.427344		14.7229	0.00806968	-0.025831
14.7489	0.851288	0.430755		14.7495	0.00755907	-0.0320384
14.7755	0.861979	0.434943		14.7761	0.00719864	-0.029185
14.8021	0.872071	0.438927		14.8027	0.00650781	-0.032539
14.8287	0.881758	0.442614		14.8293	0.00590709	-0.0299359
14.8553	0.890959	0.445837		14.8559	0.00567681	-0.0296856
14.8819	0.900294	0.449496		14.8825	0.0050861	-0.0280837
14.9085	0.909717	0.452957		14.9091	0.00365439	-0.0294353
14.9351	0.918444	0.456726		14.9357	0.00286344	-0.0331898
14.9617	0.927231	0.459751		14.9623	0.00237285	-0.0336904
14.9882	0.935331	0.46217		14.9889	0.00207249	-0.0318883
15.0148	0.943146	0.464893		15.0155	0.00259311	-0.0284341
15.0414	0.950446	0.467686		15.0421	0.00248298	-0.0270324
15.068	0.957554	0.470431		15.0687	0.00180216	-0.0244293
15.0946	0.964036	0.47301		15.0953	0.00170204	-0.0306868
15.1212	0.970442	0.475131		15.1219	0.0015018	-0.030837
15.1478	0.976343	0.477065		15.1485	0.00114137	-0.0279335
15.1744	0.981334	0.479699		15.1751	0.00157189	-0.0278334
15.201	0.986158	0.481474		15.2017	0.00223268	-0.0284842
15.2276	0.990046	0.482636		15.2283	0.00159191	-0.0267821
15.2542	0.994303	0.484102		15.2549	0.000320384	-0.0264317
15.2808	0.997951	0.485006		15.2815	0.000110132	-0.0256808
15.3074	1.00081	0.486086		15.308	0.000500601	-0.0299359
15.334	1.00297	0.487116		15.3346	3.0036e-05	-0.0286344
15.3605	1.00453	0.487612		15.3612	2.0024e-05	-0.0276832
15.3871	1.0057	0.488312		15.3878	-0.000180216	-0.0282339
15.4137	1.0065	0.488659		15.4144	0.000390469	-0.025831
15.4403	1.00669	0.4891		15.441	0.00010012	-0.0227773
15.4669	1.0061	0.488742		15.4676	-0.000340408	-0.021626
15.4935	1.00466	0.488869		15.4942	-0.000190228	-0.0230276
15.5201	1.00278	0.488406		15.5208	-0.000460553	-0.0229275
15.5467	1.00054	0.487155		15.5474	-0.000590709	-0.0227773
15.5733	0.997302	0.485651		15.574	-0.000750901	-0.0258811
15.5999	0.993868	0.484686		15.6006	-0.00151181	-0.0263316
15.6265	0.98937	0.483132		15.6272	-0.00166199	-0.0218763
15.6531	0.985211	0.482647		15.6538	-0.000871045	-0.0159692
15.6797	0.980465	0.480884		15.6804	-0.000881057	-0.0160693
15.7062	0.973679	0.478674		15.707	-0.00168202	-0.0220264
15.7328	0.967229	0.476917		15.7336	-0.00157189	-0.0261814
15.7594	0.959933	0.474365		15.7602	-0.00172207	-0.0247297
15.786	0.952912	0.471974		15.7868	-0.00163196	-0.0231778
15.8126	0.945519	0.469571		15.8134	-0.00153184	-0.0242291
15.8392	0.93688	0.467014		15.84	-0.00171205	-0.0215759
15.8658	0.928089	0.46416		15.8666	-0.00237285	-0.0240288
15.8924	0.918705	0.460947		15.8932	-0.00221266	-0.0262315
15.919	0.908863	0.457999		15.9198	-0.00168202	-0.022527
15.9456	0.899184	0.454709		15.9464	-0.00195234	-0.019974
15.9722	0.888242	0.450731		15.973	-0.00197237	-0.0218262
15.9988	0.877724	0.447854		15.9996	-0.00218262	-0.0190729
16.0254	0.86711	0.444476		16.0262	-0.00271326	-0.0162695
16.052	0.855744	0.440751		16.0528	-0.00254305	-0.0214257
16.0785	0.844017	0.436789		16.0794	-0.00264317	-0.0243292
16.1051	0.831766	0.43205		16.1059	-0.00248298	-0.0243793
16.1317	0.819682	0.428016		16.1325	-0.00211254	-0.018322
16.1583	0.807667	0.424258		16.1591	-0.0023328	-0.0171706
16.1849	0.795077	0.420087		16.1857	-0.0028334	-0.018322
16.2115	0.782315	0.415557		16.2123	-0.00314377	-0.019974
16.2381	0.769469	0.411127		16.2389	-0.00267321	-0.0229275
16.2647	0.756426	0.40663		16.2655	-0.00220264	-0.0180216
16.2913	0.743556	0.402255		16.2921	-0.00236284	-0.0204746
16.3179	0.729947	0.397367		16.3187	-0.00303364	-0.0187725
16.3445	0.716643	0.392689		16.3453	-0.00303364	-0.0177213
16.3711	0.703651	0.38741		16.3719	-0.0025831	-0.018372
16.3977	0.689979	0.38256		16.3985	-0.00278334	-0.0187725
16.4242	0.676712	0.377965		16.4251	-0.00287345	-0.0180216
16.4508	0.663463	0.372834		16.4517	-0.00290348	-0.0213757
16.4774	0.65012	0.367533		16.4783	-0.00318382	-0.0218763
16.504	0.636626	0.362899		16.5049	-0.0030837	-0.0184221
16.5306	0.623017	0.357515		16.5315	-0.00253304	-0.0187725
16.5572	0.609782	0.352892		16.5581	-0.0020825	-0.0198238
16.5838	0.596587	0.347425		16.5847	-0.00222267	-0.0209251
16.6104	0.583321	0.34256		16.6113	-0.00262315	-0.0182219
16.637	0.570501	0.338003		16.6379	-0.00214257	-0.0129155
16.6636	0.557534	0.332922		16.6645	-0.00251302	-0.0123648
16.6902	0.544428	0.328144		16.6911	-0.00323388	-0.0196736
16.7168	0.531744	0.322705		16.7177	-0.00346416	-0.01667
16.7434	0.518852	0.316986		16.7443	-0.00334401	-0.0128154
16.77	0.506324	0.312566		16.7709	-0.00314377	-0.0127653
16.7965	0.493921	0.307733		16.7975	-0.00305366	-0.0125651
16.8231	0.481608	0.301898		16.8241	-0.00269323	-0.0138666
16.8497	0.469803	0.296564		16.8507	-0.00290348	-0.0152683
16.8763	0.457608	0.291119		16.8773	-0.00329395	-0.0167701
16.9029	0.446024	0.285752		16.9038	-0.003334	-0.0131658
16.9295	0.434485	0.280479		16.9304	-0.00256308	-0.0147177
16.9561	0.422838	0.275767		16.957	-0.00285342	-0.0136664
16.9827	0.411752	0.27056		16.9836	-0.00272327	-0.0130657
17.0093	0.400612	0.265347		17.0102	-0.00260312	-0.0107629
17.0359	0.389662	0.260398		17.0368	-0.0026632	-0.00956147
17.0625	0.37896	0.255698		17.0634	-0.00302363	-0.010012
17.0891	0.368281	0.250463		17.09	-0.00345414	-0.0125651
17.1157	0.358355	0.246021		17.1166	-0.00324389	-0.0106127
17.1422	0.348513	0.241855		17.1432	-0.00284341	-0.0119644
17.1688	0.338215	0.236973		17.1698	-0.00271326	-0.0131157
17.1954	0.328776	0.232025		17.1964	-0.00285342	-0.0181718
17.222	0.31933	0.226762		17.223	-0.00278334	-0.0110633
17.2486	0.309897	0.222277		17.2496	-0.00237285	-0.00991189
17.2752	0.300969	0.218083		17.2762	-0.00224269	-0.0113636
17.3018	0.292035	0.213273		17.3028	-0.00196235	-0.00966159
17.3284	0.283648	0.208578		17.3294	-0.00187225	-0.00986183
17.355	0.275212	0.204213		17.356	-0.00234281	-0.0111133
17.3816	0.266963	0.199987		17.3826	-0.00249299	-0.00881057
17.4082	0.259075	0.195942		17.4092	-0.00270324	-0.00851021
17.4348	0.251294	0.192261		17.4358	-0.00236284	-0.00926111
17.4614	0.243824	0.188338		17.4624	-0.00229275	-0.00600721
17.488	0.236662	0.184354		17.489	-0.00202243	-0.00360433
17.5145	0.229451	0.180309		17.5156	-0.00188226	0.00010012
17.5411	0.222502	0.176804		17.5422	-0.00243292	-0.000350421
17.5677	0.215804	0.173195		17.5688	-0.00210252	-0.00510613
17.5943	0.209295	0.169563		17.5954	-0.00164197	-0.00961153
17.6209	0.203183	0.165948		17.622	-0.00154185	-0.00565679
17.6475	0.196861	0.162163		17.6486	-0.00199239	-0.00610733
17.6741	0.190853	0.158383		17.6752	-0.0022527	-0.00575691
17.7007	0.185268	0.155043		17.7017	-0.00206247	-0.00600721
17.7273	0.179703	0.152023		17.7283	-0.00223268	-0.000951141
17.7539	0.174424	0.148827		17.7549	-0.00155186	-0.00555667
17.7805	0.169356	0.145207		17.7815	-0.00195234	-0.00861033
17.8071	0.164395	0.142248		17.8081	-0.00217261	-0.00971165
17.8337	0.159668	0.139895		17.8347	-0.00172207	-0.0103624
17.8602	0.155023	0.136787		17.8613	-0.00224269	-0.00530637
17.8868	0.150638	0.134081		17.8879	-0.00261314	-0.00580697
17.9134	0.146361	0.131403		17.9145	-0.0024129	-0.00800961
17.94	0.14224	0.128637		17.9411	-0.00236284	-0.00931117
17.9666	0.138331	0.125446		17.9677	-0.00290348	-0.00901081
17.9932	0.134561	0.122553		17.9943	-0.00360433	-0.00911093
18.0198	0.130863	0.119969		18.0209	-0.00385463	-0.0148178
18.0464	0.127427	0.117776		18.0475	-0.0036644	-0.0141169
18.073	0.123988	0.115048		18.0741	-0.0040849	-0.00755907
18.0996	0.120832	0.112811		18.1007	-0.00423508	-0.00455547
18.1262	0.117736	0.110733		18.1273	-0.00393472	-0.00395475
18.1528	0.114722	0.108303		18.1539	-0.00464557	-0.00861033
18.1794	0.111946	0.105702		18.1805	-0.00505607	-0.013366
18.206	0.109227	0.104253		18.2071	-0.004996	-0.0140168
18.2325	0.106659	0.102176		18.2337	-0.00451542	-0.0126151
18.2591	0.104169	0.0995856		18.2603	-0.00545655	-0.0136163
18.2857	0.101666	0.0972657		18.2869	-0.00494594	-0.0122647
18.3123	0.0993189	0.0948686		18.3135	-0.00503604	-0.00991189
18.3389	0.097118	0.0933312		18.3401	-0.00539648	-0.010863
18.3655	0.0950692	0.0911656		18.3667	-0.00522627	-0.0135162
18.3921	0.0930645	0.0889889		18.3933	-0.00510613	-0.0151181
18.4187	0.0910377	0.0873027		18.4199	-0.00567681	-0.0178214
18.4453	0.0892325	0.0854953		18.4465	-0.00586704	-0.013366
18.4719	0.0874019	0.0833076		18.4731	-0.00565679	-0.014167
18.4985	0.0856011	0.0812191		18.4997	-0.00522627	-0.0139668
18.5251	0.083959	0.0796652		18.5262	-0.00495595	-0.0138166
18.5517	0.0824535	0.0780671		18.5528	-0.005837	-0.0135162
18.5782	0.0810142	0.0762762		18.5794	-0.0061674	-0.0137165
18.6048	0.0795935	0.0746837		18.606	-0.00638767	-0.0118642
18.6314	0.0781465	0.073025		18.6326	-0.00593712	-0.0146175
18.658	0.0768096	0.071405		18.6592	-0.0056668	-0.0209752
18.6846	0.0755709	0.0699116		18.6858	-0.00652783	-0.0212255
18.7112	0.0743167	0.0680215		18.7124	-0.00626752	-0.018372
18.7378	0.0731198	0.0663518		18.739	-0.00604726	-0.0136163
18.7644	0.0719494	0.0650458		18.7656	-0.00633761	-0.0173208
18.791	0.0709619	0.0632549		18.7922	-0.00580697	-0.0151682
18.8176	0.0699226	0.0618332		18.8188	-0.00597717	-0.0163696
18.8442	0.0688238	0.0603178		18.8454	-0.00654786	-0.0184221
18.8708	0.0678904	0.0579098		18.872	-0.00673809	-0.0230276
18.8974	0.0669657	0.0568958		18.8986	-0.00722867	-0.0227773
18.924	0.0660355	0.0551325		18.9252	-0.00778935	-0.0230777
18.9505	0.065166	0.0540304		18.9518	-0.00757909	-0.0209251
18.9771	0.06427	0.0527134		18.9784	-0.00776932	-0.0176211
19.0037	0.063439	0.0513302		19.005	-0.00797958	-0.0225771
19.0303	0.0626984	0.0498259		19.0316	-0.00810973	-0.0287345
19.0569	0.0619148	0.0487403		19.0582	-0.00880056	-0.0239788
19.0835	0.0613097	0.0474784		19.0848	-0.00837004	-0.0205747
19.1101	0.0605746	0.0463212		19.1114	-0.00800961	-0.0232779
19.1367	0.0598329	0.0451089		19.138	-0.00889067	-0.0264317
19.1633	0.0592378	0.0442878		19.1646	-0.00876051	-0.0257809
19.1899	0.0585534	0.0431306		19.1912	-0.00854025	-0.0242291
19.2165	0.0579583	0.0414444		19.2178	-0.00797958	-0.0287345
19.2431	0.0573962	0.0404635		19.2444	-0.00783941	-0.0270825
19.2697	0.056801	0.0391686		19.271	-0.00884061	-0.0202743
19.2962	0.0562478	0.0378571		19.2976	-0.00929115	-0.0214758
19.3228	0.055743	0.0369368		19.3241	-0.00935122	-0.0206748
19.3494	0.0552813	0.0360827		19.3507	-0.00916099	-0.0200741
19.376	0.0547456	0.0351184		19.3773	-0.00869043	-0.0223268
19.4026	0.0542321	0.0343193		19.4039	-0.0087505	-0.0269824
19.4292	0.0537802	0.0331732		19.4305	-0.00985182	-0.0258811
19.4558	0.0532457	0.032049		19.4571	-0.00902082	-0.0280336
19.4824	0.0527365	0.0308863		19.4837	-0.00924109	-0.0297857
19.509	0.052375	0.0297236		19.5103	-0.0100921	-0.0252303
19.5356	0.0520069	0.0285443		19.5369	-0.00946135	-0.0248298
19.5622	0.0515749	0.0280484		19.5635	-0.00940128	-0.0231778
19.5888	0.0511197	0.0276131		19.5901	-0.00917101	-0.0223268
19.6154	0.0507307	0.0263897		19.6167	-0.00931117	-0.0275831
19.6419	0.0503538	0.0255907		19.6433	-0.00970164	-0.0276332
19.6685	0.050011	0.0248248		19.6699	-0.00960152	-0.0304866
19.6951	0.0497355	0.024406		19.6965	-0.00960152	-0.0351922
19.7217	0.0493718	0.0234141		19.7231	-0.00990188	-0.0297357
19.7483	0.049039	0.0225875		19.7497	-0.00941129	-0.0277833
19.7749	0.0487734	0.022301		19.7763	-0.00928114	-0.0300861
19.8015	0.0484207	0.0218491		19.8029	-0.00930116	-0.0255807
19.8281	0.0481562	0.0209013		19.8295	-0.00961153	-0.0321386
19.8547	0.0478983	0.0206919		19.8561	-0.0100721	-0.030036
19.8813	0.0475622	0.0199645		19.8827	-0.00984181	-0.0292351
19.9079	0.0473869	0.0189341		19.9093	-0.00982179	-0.032539
19.9345	0.0470927	0.0182673		19.9359	-0.00971165	-0.029185
19.9611	0.04688	0.0174793		19.9625	-0.00963156	-0.0307369
19.9877	0.0466882	0.0166858		19.9891	-0.00972167	-0.0351922
20.0142	0.046341	0.0164047		20.0157	-0.00997197	-0.0324389
20.0408	0.0461537	0.016008		20.0423	-0.00949139	-0.0315879
20.0674	0.0460611	0.0159749		20.0689	-0.00844013	-0.0326392
20.094	0.0458065	0.01576		20.0955	-0.00906087	-0.0311874
20.1206	0.0455718	0.0151208		20.122	-0.010843	-0.0319884
20.1472	0.0454318	0.0144265		20.1486	-0.00987185	-0.0327393
20.1738	0.045283	0.0143163		20.1752	-0.00973168	-0.0328394
20.2004	0.0451364	0.0140132		20.2018	-0.00934121	-0.0318382
20.227	0.044916	0.0138644		20.2284	-0.00936123	-0.032539
20.2536	0.0447639	0.0133354		20.255	-0.00878054	-0.0346916
20.2802	0.0446008	0.0126852		20.2816	-0.00846015	-0.0322887
20.3068	0.0444443	0.0120074		20.3082	-0.00861033	-0.0304365
20.3334	0.0442911	0.0118861		20.3348	-0.00823989	-0.0331898
20.3599	0.0441335	0.0121231		20.3614	-0.00813977	-0.030837
20.3865	0.044009	0.0112194		20.388	-0.00783941	-0.0304365
20.4131	0.0438459	0.0107344		20.4146	-0.00732879	-0.0319383
20.4397	0.0437015	0.0107179		20.4412	-0.00738887	-0.0282339
20.4663	0.043599	0.0103652		20.4678	-0.00739888	-0.0259311
20.4929	0.0434701	0.0101889		20.4944	-0.00732879	-0.0212755
20.5195	0.0433742	0.00953866		20.521	-0.0067481	-0.0268322
20.5461	0.0432298	0.00959928		20.5476	-0.00600721	-0.0264818
20.5727	0.0431615	0.0100126		20.5742	-0.00554666	-0.0207249
20.5993	0.043167	0.0094009		20.6008	-0.00562675	-0.0254305
20.6259	0.0430215	0.0084035		20.6274	-0.00564678	-0.0255306
20.6525	0.0429708	0.00823268		20.654	-0.00537645	-0.0243292
20.6791	0.0428496	0.00883332		20.6806	-0.00487585	-0.0237785
20.7057	0.0427923	0.00883332		20.7072	-0.00486584	-0.0242791
20.7322	0.0427394	0.00852473		20.7338	-0.00476572	-0.0184722
20.7588	0.0425741	0.00809491		20.7604	-0.00370445	-0.0193232
20.7854	0.0425057	0.00811695		20.787	-0.00354425	-0.0203244
20.812	0.0424925	0.0079296		20.8136	-0.00343412	-0.0222767
20.8386	0.0424385	0.0076706		20.8402	-0.00278334	-0.0189728
20.8652	0.0424032	0.00764305		20.8668	-0.00218262	-0.0192231
20.8918	0.042358	0.00752733		20.8934	-0.00240288	-0.0203244
20.9184	0.0423206	0.00741712		20.9199	-0.0025831	-0.0207749
20.945	0.0421905	0.007092		20.9465	-0.00214257	-0.0178714
20.9716	0.0421189	0.00684954		20.9731	-0.00244293	-0.0189728
20.9982	0.0420913	0.00665116		20.9997	-0.00221266	-0.0190729
21.0248	0.0420462	0.00648034		21.0263	-0.00144173	-0.0186724
21.0514	0.042023	0.00615522		21.0529	-0.000490589	-0.0157189
21.0779	0.0418632	0.00680546		21.0795	-0.000580697	-0.0145675
21.1045	0.0418919	0.00608358		21.1061	-0.000570685	-0.0151181
21.1311	0.0419326	0.00591827		21.1327	-0.000350421	-0.0138166
21.1577	0.0418279	0.0062489		21.1593	0.000350421	-0.0179716
21.1843	0.0417872	0.00628196		21.1859	-0.000270324	-0.0197737
21.2109	0.0418114	0.0058301		21.2125	-0.00103124	-0.020825
21.2375	0.0417673	0.00570887		21.2391	-0.000991189	-0.0226772
21.2641	0.0416659	0.00570887		21.2657	-0.00119143	-0.0280336
21.2907	0.0417221	0.00552702		21.2923	-0.000901081	-0.0280336
21.3173	0.0416836	0.00554907		21.3189	-0.000981177	-0.0286344
21.3439	0.0416307	0.00554907		21.3455	-0.000961153	-0.0313376
21.3705	0.0416406	0.00537273		21.3721	-0.00182219	-0.0288847
21.3971	0.0415756	0.00508067		21.3987	-0.00242291	-0.0344413
21.4237	0.0414532	0.00546641		21.4253	-0.00270324	-0.0364437
21.4502	0.0415568	0.00494291		21.4519	-0.00318382	-0.0421005
21.4768	0.0415987	0.00498148		21.4785	-0.0032539	-0.0429015
21.5034	0.0414246	0.00470596		21.5051	-0.00338406	-0.0411994
21.53	0.0414202	0.00490985		21.5317	-0.00405487	-0.0370945
21.5566	0.041505	0.0052515		21.5583	-0.00434521	-0.042501
21.5832	0.041472	0.00438635		21.5849	-0.004996	-0.0480577
21.6098	0.0413529	0.00401164		21.6115	-0.0064177	-0.0513116
21.6364	0.0412515	0.00408879		21.6381	-0.00631758	-0.0520124
21.663	0.0411292	0.0038849		21.6647	-0.00656788	-0.0561674
21.6896	0.0410234	0.00370856		21.6913	-0.00776932	-0.0577693
21.7162	0.041051	0.00365346		21.7178	-0.00868042	-0.0618242
21.7428	0.040987	0.00337242		21.7444	-0.00873048	-0.0684822
21.7694	0.0408702	0.00276627		21.771	-0.00949139	-0.0745895
21.7959	0.0407931	0.00251278		21.7976	-0.0102523	-0.07504
21.8225	0.0407534	0.00235849		21.8242	-0.0106828	-0.081648
21.8491	0.0407049	0.00210501		21.8508	-0.0117942	-0.0847016
21.8757	0.0405308	0.00210501		21.8774	-0.013306	-0.0865539
21.9023	0.0404999	0.00212705		21.904	-0.0137765	-0.0914598
21.9289	0.0404834	0.00217664		21.9306	-0.0145074	-0.0974169
21.9555	0.0403721	0.00190663		21.9572	-0.0154485	-0.102373
21.9821	0.0402696	0.00177989		21.9838	-0.0164798	-0.107429
22.0087	0.0401594	0.00169723		22.0104	-0.0172807	-0.107579
22.0353	0.0401021	0.00185153		22.037	-0.0184021	-0.10873
22.0619	0.0400238	0.00203888		22.0636	-0.0199439	-0.11664
22.0885	0.0399114	0.0017854		22.0902	-0.0204445	-0.119293
22.1151	0.0397714	0.00197827		22.1168	-0.0211053	-0.122897
22.1417	0.0396833	0.00188459		22.1434	-0.0219263	-0.120895
22.1682	0.0395708	0.0019452		22.17	-0.0226071	-0.123748
22.1948	0.0394177	0.00138864		22.1966	-0.0228474	-0.128454
22.2214	0.0392424	0.00129497		22.2232	-0.0233981	-0.130256
22.248	0.0391179	0.00129497		22.2498	-0.0244794	-0.129555
22.2746	0.0389779	0.00117925		22.2764	-0.0247897	-0.130757
22.3012	0.0388633	0.00136109		22.303	-0.0257609	-0.13316
22.3278	0.038655	0.00157049		22.3296	-0.0261514	-0.131708
22.3544	0.0384643	0.00126741		22.3562	-0.025851	-0.132759
22.381	0.0382704	0.00120129		22.3828	-0.0264517	-0.135412
22.4076	0.0380841	0.00102495		22.4094	-0.0270525	-0.134612
22.4342	0.0378802	0.00104148		22.436	-0.027483	-0.134762
22.4608	0.0376278	0.00114067		22.4626	-0.0278734	-0.13306
22.4874	0.0374691	0.00128394		22.4892	-0.0276732	-0.134211
22.5139	0.037392	0.00160355		22.5157	-0.0280737	-0.132309
22.5405	0.0371628	0.00169172		22.5423	-0.028344	-0.132759
22.5671	0.0367693	0.000826574		22.5689	-0.028354	-0.137815
22.5937	0.0364695	0.000325119		22.5955	-0.0286844	-0.136564
22.6203	0.0362072	0.000567581		22.6221	-0.0293052	-0.133761
22.6469	0.0359736	0.00089821		22.6487	-0.0286143	-0.128805
22.6735	0.0357003	0.000738406		22.6753	-0.0287044	-0.129055
22.7001	0.0353983	0.000435329		22.7019	-0.0286544	-0.129856
22.7267	0.035179	7.16364e-05		22.7285	-0.0280136	-0.130707
22.7533	0.0348946	0.000143273		22.7551	-0.0279135	-0.127353
22.7799	0.0345849	0.000512476		22.7817	-0.0276031	-0.123198
22.8065	0.0342797	0.00011572		22.8083	-0.0269523	-0.120945
22.8331	0.0339744	1.65315e-05		22.8349	-0.0268522	-0.122397
22.8597	0.0336151	0.00033614		22.8615	-0.0269123	-0.119443
22.8862	0.0333131	0.000534518		22.8881	-0.0263516	-0.118642
22.9128	0.0330123	0.000181846		22.9147	-0.0253604	-0.119543
22.9394	0.0326342	1.65315e-05		22.9413	-0.0249399	-0.113186
22.966	0.0323146	-0.000137762		22.9679	-0.0239888	-0.10843
22.9926	0.0320149	-0.000247972		22.9945	-0.0226872	-0.102473
23.0192	0.0316556	-0.000374713		23.0211	-0.0221766	-0.0971165
23.0458	0.0313294	-0.00022042		23.0477	-0.0217761	-0.0948638
23.0724	0.0309679	-4.40839e-05		23.0743	-0.0206247	-0.0959151
23.099	0.0305358	-0.000253483		23.1009	-0.019964	-0.0948138
23.1256	0.0302449	-0.000198378		23.1275	-0.0188026	-0.0930116
23.1522	0.0299132	-0.000363692		23.1541	-0.0179816	-0.0884561
23.1788	0.0295572	-0.000903721		23.1807	-0.0169303	-0.087505
23.2054	0.0292023	-0.000683301		23.2073	-0.0160493	-0.0828995
23.2319	0.0287989	-0.000765958		23.2339	-0.0156288	-0.0788947
23.2585	0.0284529	-0.00110761		23.2605	-0.0150681	-0.0814477
23.2851	0.0281244	-0.00125088		23.2871	-0.0140268	-0.0784942
23.3117	0.0277497	-0.000980868		23.3136	-0.0125451	-0.0726372
23.3383	0.0273794	-0.000699832		23.3402	-0.0119744	-0.0677313
23.3649	0.0270069	3.85734e-05		23.3668	-0.0114738	-0.0697337
23.3915	0.0265859	0.000517986		23.3934	-0.0112735	-0.06668
23.4181	0.0262112	-7.16364e-05		23.42	-0.0105827	-0.0625751
23.4447	0.0258365	-0.00044635		23.4466	-0.0102223	-0.0634762
23.4713	0.0254309	-0.000154294		23.4732	-0.00963156	-0.0590208
23.4979	0.0250959	-0.00022593		23.4998	-0.00915098	-0.0567681
23.5245	0.0246749	-0.00066677		23.5264	-0.00915098	-0.0607729
23.5511	0.0242197	-0.00108006		23.553	-0.00825991	-0.059171
23.5777	0.0237844	-0.000854126		23.5796	-0.00756908	-0.0528634
23.6042	0.0235111	-0.00056207		23.6062	-0.00736884	-0.0501602
23.6308	0.0231033	-0.000203888		23.6328	-0.0071686	-0.0511113
23.6574	0.0226327	-0.000418797		23.6594	-0.00713857	-0.0514117
23.684	0.0222988	-0.000606154		23.686	-0.00661794	-0.0474569
23.7106	0.0219472	-0.000876168		23.7126	-0.0059171	-0.0434521
23.7372	0.0213884	-0.000424308		23.7392	-0.00614738	-0.0434521
23.7638	0.020952	-0.000567581		23.7658	-0.00646776	-0.0446536
23.7904	0.0205927	-0.00067228		23.7924	-0.00721866	-0.0434021
23.817	0.020283	-0.00116271		23.819	-0.00697837	-0.0415499
23.8436	0.0199094	-0.00101944		23.8456	-0.00652783	-0.0422507
23.8702	0.0194487	-0.00067228		23.8722	-0.00689828	-0.0467561
23.8968	0.0190707	-0.00066677		23.8988	-0.00683821	-0.044203
23.9234	0.0186784	-0.000529007		23.9254	-0.00694834	-0.0451542
23.9499	0.0182981	-0.000462881		23.952	-0.00670805	-0.0395975
23.9765	0.017897	-0.000198378		23.9786	-0.00635763	-0.0306868
