# Supplementary material for: Tracking multiple conformations occurring on angstrom-and-millisecond scales in single amino-acid-transporter molecules
Source: eLife. 2023 Feb 17;12:e82175. doi: 10.7554/eLife.82175 (PMC9937647; doi:10.7554/eLife.82175)
Supplement: Figure 3—figure supplement 1—source data 1. [file elife-82175-fig3-figsupp1-data1.xlsx]

## Sheet: Raw intenity traces apo pt 1 fi
Intensities traces captured from EMCCD camera - [Arg]= 0 mM
	Particle Intensity by channel				Background intensity by channel				x-coordinates of particle				y-coordinates of particle				Intensity with background subtracted
Frame #	I45	I135	I90	I0	I45 - bak	I135 - bak	I90 - bak	I0 - bak	x-45	x-135	x-90	x-0	y-45	y-135	y-90	y-0	I45	I135	I90	I0
1	23558.1	9729.08	12083.1	15145	9416.57	8542.9	10395.3	7667.4	4.918	71.259	135.228	198.908	44.029	37.954	40.797	46.058	14141.5	1186.18	1687.81	7477.6
2	12677.6	14209.2	7712.74	22370	10788.8	7380.48	7795.01	8893.95	5.028	70.947	134.998	198.908	44.112	38.06	40.942	46.097	1888.81	6828.69	-82.271	13476
3	18286.4	14229.1	12464.3	16601	10168.8	6862.87	8502.55	7184.12	5.322	71.02	134.977	198.858	44.062	38.128	40.967	46.008	8117.56	7366.21	3961.77	9416.88
4	22657.3	9734.06	9837.4	18027	9148.36	7237.4	8424.46	8071.38	5.079	71	135.169	198.806	43.935	37.746	41.095	45.816	13508.9	2496.66	1412.94	9955.62
5	16091.3	12664.3	13079.5	17417	9616.63	8159.31	8573.89	8225.1	5.208	70.913	135.008	198.878	44.048	37.913	41.021	46.204	6474.69	4505.03	4505.6	9191.9
6	17603.2	11376.5	12690.2	18347	9413.27	8375.22	8538.08	7515.3	4.932	70.995	134.919	199.247	44.04	38.01	40.931	46.193	8189.88	3001.27	4152.08	10831.7
7	19696.7	8776.89	16083.1	15478	8791.49	9109.39	7902.76	8151	5.186	71.103	135.169	198.98	44.21	37.812	40.879	46.079	10905.2	-332.494	8180.35	7327
8	18662.9	14389.4	9751.58	17696	9063.73	7974.8	8683.99	8343.73	4.997	70.998	135.192	198.976	44.338	37.973	41.313	46.333	9599.18	6414.64	1067.59	9352.27
9	15479.1	19981.1	7887.08	21333	8736.16	7719.07	8466.15	7262.12	5.143	70.955	134.886	198.907	44.167	37.847	41.165	46.274	6742.98	12262	-579.064	14070.9
10	16519.7	12122.5	14702.8	19570	10797.5	9157.3	8147.31	7848.1	4.994	70.929	135.314	198.847	44.059	37.936	40.658	46.139	5722.18	2965.21	6555.49	11721.9
11	16777.9	13239	10765.1	21642	10473.3	9011.63	8011.97	8313.5	5.261	70.999	135.232	199.074	43.949	38.018	41.038	46.076	6304.62	4227.41	2753.16	13328.5
12	18363	11956.2	10483.3	16967	9100.73	7546.54	9568.56	6555.9	5.091	71.108	135.171	198.96	43.996	38.315	41.08	46.226	9262.29	4409.64	914.724	10411.1
13	16011.3	10853.6	10570.9	14977	8789.66	7878.01	10198.9	8087.95	5.104	70.988	134.842	198.943	44.355	38.12	41.146	46.035	7221.62	2975.57	372.019	6889.05
14	16889.5	14100.6	11033.4	22833	9636.05	8524.78	9685.7	7793.5	5.068	70.851	135.45	198.856	43.989	37.974	40.846	46.024	7253.47	5575.82	1347.72	15039.5
15	14795.9	11547.8	12269.2	14797	9913.42	8570.09	8351.65	8642.08	5.197	71.126	135.102	199.017	43.964	38.055	41.127	46.12	4882.52	2977.71	3917.55	6154.93
16	15212	14216.1	8921.41	17314	10497.1	8224.38	9716.83	7644	5.106	71.167	135.162	199.023	44.113	37.963	41.137	46.187	4714.85	5991.76	-795.415	9670
17	17503.9	15500	10731.7	17658	9793.24	8938.47	9242.98	8671.98	4.993	71.023	134.877	199.228	43.997	38.105	40.906	46.001	7710.71	6561.53	1488.73	8986.02
18	14605.4	15494	10990.1	21067	10530.8	8765.61	9494.58	7650.82	5.116	70.96	135.078	198.94	44.097	38.044	40.846	46.449	4074.61	6728.41	1495.48	13416.2
19	20121.8	11655.4	12041.6	20522	9374.07	9132.05	9260	7643.35	5.172	70.937	134.942	199.046	44.178	38.066	41.022	46.101	10747.7	2523.33	2781.55	12878.6
20	15528.7	17791.8	8498.65	26713	9962.51	8014.29	9055.96	7834.77	5.198	71.026	135.008	198.969	44.107	37.796	41.084	46.221	5566.23	9777.54	-557.316	18878.2
21	16527.6	12499	12184.3	15811	8873.2	8098.46	8530.44	8275.8	5.496	71.118	135.074	199.062	44.275	38.037	41.083	46.179	7654.43	4400.55	3653.84	7535.2
22	15064.3	15775.9	12326.1	21011	8357.67	8819.35	8188.71	8180.25	5.387	71	135.235	198.837	43.814	38.008	40.946	46.192	6706.6	6956.55	4137.4	12830.8
23	21839.9	12901.4	10467	18368	9506.34	8278.11	8866.01	7320.62	5.037	71.051	134.829	199	43.986	37.788	40.772	46.149	12333.6	4623.28	1601.02	11047.4
24	20313.4	12757	14297.2	18049	8885.29	8280.38	8546	8969.67	5.267	70.942	135.084	198.924	44.432	37.974	40.975	46.307	11428.1	4476.59	5751.2	9079.33
25	22034.9	14401.4	9034.33	19209	8429.48	7292.75	7836.4	7954.05	5.172	71.167	134.859	199.132	44.059	37.67	40.815	46.189	13605.5	7108.64	1197.92	11255
26	18381.1	12508	13478.8	16101	9466.4	8715.76	8431.5	8118.5	5.127	71.325	134.965	198.86	44.342	38.112	41.024	46.227	8914.66	3792.21	5047.27	7982.5
27	24403.6	9448.21	10414.6	16152	9168.52	7389.54	8543.95	8763.62	5.331	71.06	134.873	198.921	44.263	38.042	41.068	45.889	15235.1	2058.66	1870.69	7388.38
28	16729.4	14435.3	10909.7	19170	11104.6	7534.24	8859.85	8409.7	5.286	71.198	134.955	198.81	43.858	37.71	41.025	46.145	5624.83	6901.02	2049.82	10760.3
29	18810.6	10574.7	11027.1	15971	9514.04	7277.22	7745.1	7004.4	4.915	70.968	135.024	199.09	44.207	38.167	40.914	46.202	9296.56	3297.49	3282	8966.6
30	19336	12809.8	13005.4	20223	9933.93	7745.29	8889.79	6430.12	5.012	70.968	135.142	198.919	43.787	38.037	40.896	46.157	9402.03	5064.47	4115.63	13792.9
31	19223.2	10939.2	9202.35	18743	9453.95	6606.18	9529.22	8840	5.17	71.247	134.901	199.075	43.971	38.195	40.933	46.261	9769.28	4333.07	-326.873	9903
32	17414.9	12491	13658.5	17692	9574.49	7352.64	8734.19	7675.2	5.091	70.995	135.152	199.072	44.255	38.189	40.986	46.339	7840.39	5138.4	4924.35	10016.8
33	17688.8	11244	13192.4	19177	9768.69	8895.09	7875.16	9294.02	5.29	71.151	135.115	198.969	43.904	38.037	41.122	46.055	7920.15	2348.93	5317.25	9882.98
34	13074.4	11350.6	12736.2	20430	9774.55	6870.64	7834.35	9229.02	5.006	71.273	135.157	198.778	44.324	38.187	40.915	45.921	3299.86	4479.95	4901.87	11201
35	16544.5	12268.9	11581.8	16434	8758.51	7878.98	8917.1	8316.42	5.056	71.346	135.21	198.901	44.129	38.25	40.892	46.145	7786.02	4389.94	2664.66	8117.57
36	16258.2	17922.3	10748	20628	8890.05	8350.95	8420.64	6645.6	5.291	70.983	134.968	198.915	44.306	38.055	40.756	46.222	7368.12	9571.36	2327.33	13982.4
37	18799.3	11787.8	10416.4	15561	9261.58	8440.29	7873.98	7540.98	5.135	71.087	135.355	199.126	43.978	38.048	41.185	46.479	9537.74	3347.56	2542.46	8020.02
38	17131.9	12000	11867.2	21692	9658.77	8251.25	7900.7	7916.35	5.226	71.157	135.328	198.945	44.276	38.003	40.855	46.166	7473.14	3748.76	3966.51	13775.6
39	16695.6	12322.7	10026.2	18920	9709.7	7179.13	7910.98	7300.8	5.298	71.014	135.237	199.037	44.171	37.973	41.049	46.399	6985.91	5143.58	2115.22	11619.2
40	16480.3	11736.1	9119.24	19084	8743.49	8119.82	8341.96	7663.82	5.357	71.094	135.247	198.927	44.486	38.108	40.955	46.14	7736.78	3616.24	777.281	11420.2
41	17555.8	10958.2	9096.66	18493	7390.36	7545.89	8869.24	7834.45	5.306	71.259	134.989	199.282	43.99	38.302	41.004	46.048	10165.4	3412.28	227.416	10658.5
42	15304.4	14070.7	9505.87	21989	9146.9	7751.44	7744.51	7367.75	5.115	71.282	135.253	198.857	44.202	37.964	40.747	46.537	6157.5	6319.27	1761.36	14621.2
43	17817.4	12139.4	8142.73	18289	9249.86	7481.8	9069.17	6851	5.122	71.097	135.067	199.139	43.932	37.997	41.012	46.232	8567.5	4657.64	-926.444	11438
44	14729.4	17209.2	12006.3	23113	9042.11	8039.22	8843.7	7655.38	5.028	70.874	135.199	198.933	44.025	38.125	41.219	46.072	5687.32	9169.94	3162.62	15457.6
45	14925.6	14272.9	10893.4	17291	8308.57	7660.48	8488.75	7973.88	5.156	71.04	135.036	199.045	44.119	38.07	41.068	46.115	6617.02	6612.43	2404.65	9317.12
46	16084.6	13029.9	8900.63	17292	10486.8	7082.99	7910.98	9100	5.251	71.179	135.299	199.11	44.097	38.056	41.256	46.053	5597.72	5946.89	989.657	8192
47	15136.4	11014.9	8775.97	17073	9871.65	7945.99	8287.65	8296.92	5.226	70.843	134.975	199.133	44.218	37.982	40.911	46.312	5264.77	3068.95	488.324	8776.08
48	21349.5	8210.16	10316.2	15274	9297.86	8640.66	8908.88	6862.05	5.177	71.324	135.245	199.188	44.106	38.044	40.814	46.244	12051.6	-430.502	1407.29	8411.95
49	17944.8	13984.1	12382.1	17003	10117.1	8280.7	9468.74	9349.27	4.956	71.047	135.255	199.156	44.298	38.024	41.24	46.172	7827.62	5703.36	2913.37	7653.73
50	14890.6	12727.1	11952.1	16784	10382	8040.84	9155.78	8078.52	5.144	71.118	135.125	199.153	44.089	37.868	40.786	46.144	4508.6	4686.26	2796.34	8705.48
51	18034.9	11569.7	9424.57	18725	7177.85	7972.53	8578.88	8378.83	5.047	71.002	134.914	198.912	44.015	38.11	40.887	46.16	10857.1	3597.19	845.687	10346.2
52	13428.4	10872.5	9962.96	15174	9531.99	8589.52	7949.44	8515	5.284	71.197	134.862	198.921	44.112	37.844	41.028	46.209	3896.42	2282.99	2013.53	6659
53	15324.7	9586.65	9018.97	12680	9965.81	7851.47	8381.59	5589.68	5.069	71.311	135.27	199.161	44.324	38.166	40.791	46.211	5358.88	1735.18	637.376	7090.32
54	18762.1	8984.06	13625.1	15634	9727.28	8467.16	8889.5	6864.98	4.958	71.295	134.862	199.168	44.274	38.159	40.967	46.147	9034.84	516.907	4735.61	8769.02
55	19953.8	8696.22	13971.1	10787	8891.52	6944.12	9458.47	8046.02	5.065	71.198	134.847	199.45	44.373	38.298	40.841	46.291	11062.3	1752.09	4512.62	2740.97
56	20972.9	9425.3	15277.3	15587	9006.57	8704.76	7728.36	8556.6	5.219	71.045	135.232	198.834	44.034	37.925	40.928	46.132	11966.4	720.543	7548.96	7030.4
57	16653.9	8241.04	10161.7	15789	9585.12	7334.19	8110.61	8369.4	5.06	71.158	134.798	199.16	44.255	38.052	41.065	46.195	7068.77	906.848	2051.08	7419.6
58	17915.4	11358.6	8239.39	16054	8609.39	8127.91	8697.79	7607.93	5.069	71.195	134.901	198.979	44.153	37.904	40.705	45.939	9306.06	3230.65	-458.4	8446.08
59	16830.9	9408.37	8583.56	20482	8934.75	7480.83	8683.69	7759.38	5.037	70.937	135.058	198.871	44.181	37.98	40.83	45.953	7896.14	1927.54	-100.135	12722.6
60	19491.5	12395.4	11472.4	17018	9806.43	8098.13	8385.12	9567.35	5.21	71.079	135.027	199.027	44.109	38.115	40.918	46.089	9685.12	4297.29	3087.33	7450.65
61	16275.1	11403.4	11797.7	15759	8288.42	8036.63	7942.39	9372.67	5.022	71.039	135.099	199.06	44.075	37.926	40.796	46.151	7986.67	3366.76	3855.26	6386.32
62	19005.6	12918.3	11758.8	17882	8628.44	7798.7	8059.82	7200.05	5.131	71.211	134.906	199.036	44.169	38.284	40.916	46.23	10377.2	5119.62	3698.98	10682
63	18333.7	12698.2	11150	21835	9305.92	7227.04	8020.19	7914.4	5.039	70.925	135.029	198.933	44.026	38.028	40.955	46.284	9027.79	5471.16	3129.76	13920.6
64	17271.7	11309.8	10606.1	21980	8921.93	6849.93	7942.1	8913.77	5.314	71.034	135.045	199.103	43.923	38.055	40.997	46.125	8349.77	4459.84	2664.05	13066.2
65	17901.9	12545.8	9284.55	14644	9440.39	7530.35	9382.14	7298.85	5.234	71.066	134.82	199.15	44.218	38.172	41.138	46.264	8461.53	5015.46	-97.583	7345.15
66	14602	15236.1	9395.66	18912	9061.53	9222.36	8555.1	7172.1	5.252	71.232	135.145	198.999	44.261	38.131	40.896	46.23	5540.5	6013.69	840.56	11739.9
67	20053	9705.18	10813	18315	8498.73	6496.12	8498.15	8463.33	5.334	71.205	134.852	199.021	44.062	38.023	40.791	46.182	11554.3	3209.06	2314.86	9851.67
68	19221	9832.67	10026.2	16405	9463.47	8231.5	7797.06	6489.6	5.091	71.257	135.225	199.076	44.219	38.029	41.031	46.409	9757.5	1601.17	2229.13	9915.4
69	17705.8	12979.1	11238.5	20037	8803.21	7717.13	7508.47	7777.9	5.171	70.975	135.184	199.218	44.158	37.882	40.943	45.973	8902.54	5261.95	3730.01	12259.1
70	14432.9	11289.8	9492.32	13195	9733.51	8472.34	7919.2	7912.77	5.3	71.081	134.983	199.029	44.127	38.122	40.795	46.283	4699.41	2817.51	1573.13	5282.23
71	20685.5	11807.8	11045.2	19518	9437.09	8177.76	8963.48	7062.25	5.122	71.24	134.992	198.97	44.371	37.893	41.005	46.31	11248.4	3630.01	2081.68	12455.8
72	19326.9	11186.3	8316.17	18375	8823.36	8041.16	8870.12	7470.12	5.208	71.168	135.359	198.987	44.228	37.889	40.957	45.916	10503.6	3145.09	-553.951	10904.9
73	15857.9	12728.1	11134.6	16575	10637.8	7235.78	7177.3	7796.75	5.173	70.958	135.269	198.885	44.182	38.002	40.713	46.077	5220.15	5492.31	3957.29	8778.25
74	17648.3	12977.1	12349.6	18600	9023.06	7329.98	8112.96	7829.57	5.121	71.102	135.055	199.209	44.037	38.124	40.82	46.186	8625.2	5647.11	4236.63	10770.4
75	14089.1	13192.2	10640.5	22264	9112.46	6735.66	7207.84	7367.43	5.144	71.148	135.22	199.074	44.052	38.049	41.213	46.13	4976.61	6456.57	3432.63	14896.6
76	19409.2	10017.9	16637.8	16552	9724.72	7095.94	8437.38	6920.23	5.067	70.915	135.205	199.09	44.202	37.95	40.983	46.146	9684.53	2921.99	8200.38	9631.77
77	15343.9	9705.18	9310.75	17613	9540.05	8138.92	7468.54	7672.93	5.068	71.161	135.152	199.089	44.096	38.166	40.98	46.09	5803.81	1566.26	1842.21	9940.08
78	13940.2	13473.1	12043.4	15429	9293.09	8751.37	7318.23	7238.73	5.407	71.196	135.197	199.1	43.809	37.953	41.104	46.334	4647.15	4721.74	4725.14	8190.27
79	14473.5	10946.2	9645.89	15772	9761.73	7693.5	7878.39	7648.23	5.286	70.979	134.766	199.248	44.343	37.931	40.971	46.128	4711.78	3252.71	1767.5	8123.77
80	16228.9	10463.1	10675.7	16650	9436.73	7425.8	9045.1	8231.27	5.095	71.323	135.328	199.087	44.188	38.327	40.97	45.997	6792.14	3037.35	1630.6	8418.73
81	16723.8	12868.5	11907.9	17411	9295.66	7438.1	7962.35	7399.93	5.035	70.933	135.166	199.03	44.16	38.181	41.222	46.247	7428.13	5430.43	3945.51	10011.1
82	12626.8	9878.49	10666.7	19969	10648.1	8796.36	7718.97	6455.8	5.083	70.992	134.771	198.641	44.123	38.017	40.72	45.803	1978.78	1082.12	2947.7	13513.2
83	17348.4	11497	12359.5	14964	9321.67	7038.97	8162.28	7971.6	5.111	71.009	135.028	198.81	44.395	37.929	40.726	46.134	8026.69	4458.04	4197.24	6992.4
84	19833.1	13009	13924.1	16976	9251.69	8823.23	7825.25	8224.12	5.257	70.906	135.289	198.968	44.028	38.063	40.828	45.882	10581.5	4185.73	6098.87	8751.88
85	18542.3	13913.3	9679.31	20729	9194.53	7920.1	8306.73	6365.45	5.171	70.996	135.329	198.953	44.375	37.912	41.037	46.13	9347.75	5993.25	1372.58	14363.5
86	14554.7	12869.5	9253.84	16908	9715.92	8573.33	8794.08	7805.52	5.179	71.043	135.073	198.873	44.164	38.041	40.72	45.968	4838.75	4296.19	459.756	9102.48
87	16996.6	12480.1	12198.7	16165	8274.49	7165.86	8625.57	8228.67	4.827	71.062	134.97	198.889	43.962	37.782	40.725	46.056	8722.12	5314.22	3573.17	7936.32
88	18819.6	9531.87	10176.2	16298	10269.2	6454.03	7564.54	7897.18	5.027	71.064	134.794	198.615	44.159	38.109	41.137	46.242	8550.42	3077.84	2611.61	8400.83
89	15322.4	12556.8	7845.53	20509	9259.39	7637.5	7722.2	7893.27	4.967	71.004	134.923	198.812	43.956	37.876	40.925	45.898	6063.05	4919.27	123.329	12615.7
90	12929	12776.9	11071.4	17886	9756.23	6648.9	7723.96	7028.45	5.288	70.758	135.095	198.937	43.904	38.156	40.915	46.04	3172.74	6127.99	3347.4	10857.5
91	17053	13333.7	11119.2	17593	8186.19	6719.47	8359.58	7156.5	4.931	71.015	135.077	198.889	44.337	38.054	41.095	46.205	8866.8	6614.19	2759.67	10436.5
92	18596.4	9276.89	11980.1	16271	9233	8011.7	7936.52	7546.18	4.971	70.68	135.143	199.012	44.121	38.086	41.072	45.918	9363.39	1265.19	4043.61	8724.83
93	17936.9	14336.7	11005.4	14920	8078.47	8497.58	8365.15	7370.35	5.145	70.863	135.283	198.767	44.212	37.98	41.049	46.274	9858.4	5839.07	2640.27	7549.65
94	13434	16492	6591.69	19111	8454.76	6348.18	8111.49	6057.35	5.113	71.081	134.932	198.878	44.098	37.987	41.318	45.886	4979.28	10143.9	-1519.81	13053.6
95	15747.5	8314.74	10136.4	19673	9632.02	8560.71	8717.46	7063.88	5.239	71.113	135.022	199.012	44.171	37.714	41.059	45.902	6115.44	-245.965	1418.95	12609.1
96	12943.6	14983.1	11423.7	18615	7306.45	9680.73	9242.68	7370.68	5.067	70.954	134.911	198.851	44.031	37.932	40.85	46.145	5637.18	5302.34	2180.99	11244.3
97	15071	12610.6	8707.32	17018	9675.62	8524.45	7816.44	8361.27	5.076	71.024	135.127	199.05	43.979	37.806	40.956	45.985	5395.41	4086.11	890.876	8656.73
98	18653.9	9957.17	10606.1	20632	8488.11	8031.77	7205.78	7960.55	5.341	71.114	135.017	199.208	44.261	37.857	40.822	46.106	10165.8	1925.4	3400.36	12671.5
99	17145.4	10936.3	9570.91	14836	9270.01	7352.32	6826.17	8086.98	5.131	71.272	135.051	199.114	44.235	37.903	40.706	45.778	7875.42	3583.94	2744.74	6749.02
100	24217.6	10262	8172.54	18334	8278.16	7990.02	8797.61	7532.52	5.148	70.814	134.807	198.9	43.918	37.771	41.028	45.84	15939.4	2271.94	-625.067	10801.5
101	17670.8	14079.7	10645	22910	7970.01	7709.69	8458.51	7769.77	5.288	70.841	135.086	198.892	44.222	37.875	41.051	46.003	9700.79	6369.99	2186.47	15140.2
102	21983.1	8173.31	11183.4	15018	10644.4	7766.01	7839.93	8398	4.93	71.101	135.217	198.873	44.034	37.895	40.728	46.195	11338.7	407.296	3343.45	6620
103	19022.5	12089.6	9107.5	17331	10195.2	6720.12	7856.07	8500.7	4.972	71.022	135.002	198.808	43.934	37.975	41.05	46.02	8827.37	5369.52	1251.42	8830.3
104	16361.9	13025.9	8934.96	18443	10081.2	7451.05	7427.15	6349.2	4.828	70.815	135.112	198.986	43.945	38.097	41.095	45.81	6280.66	5574.85	1507.81	12093.8
105	11466.7	15058.8	7291.78	21949	8994.11	7921.07	8644.06	9057.75	4.918	70.788	135.051	198.897	44.162	37.915	40.848	46.042	2472.63	7137.7	-1352.28	12891.2
106	11098.1	12746	7150.86	19495	9083.51	6784.21	7474.41	7132.12	5.14	70.878	134.8	198.961	43.902	37.97	41.236	46.086	2014.57	5961.8	-323.554	12362.9
107	13962.8	16224.1	8990.97	23284	9371.87	8576.57	7417.46	7302.75	4.894	70.992	134.897	198.676	44.092	37.966	40.921	46.032	4590.92	7647.53	1573.51	15981.2
108	11473.5	12865.5	10019.9	23516	9127.85	6373.76	7812.62	7880.6	5.122	71.081	134.988	198.842	44.15	38	41.036	46.401	2345.66	6491.78	2207.25	15635.4
109	17836.5	14876.5	6556.46	22967	10207.6	7629.41	7368.14	8773.38	4.981	71.126	135.098	198.882	44.064	38.066	41.009	46.347	7628.89	7247.09	-811.675	14193.6
110	21215.3	12279.9	9536.58	21138	8927.42	6790.36	8269.15	7087.6	5.202	70.993	134.963	198.755	44.042	37.845	41.02	45.967	12287.9	5489.52	1267.43	14050.4
111	16531	11612.5	11473.4	16624	9536.39	7417.7	8062.76	6837.35	5.165	71.091	134.805	198.88	43.99	37.891	40.849	46.129	6994.62	4194.85	3410.59	9786.65
112	17824.1	8574.7	9783.2	16153	8227.23	7587.33	7915.09	8366.15	5.041	71.109	134.931	198.902	44.068	37.886	41.161	46.103	9596.9	987.375	1868.11	7786.85
113	20376.5	9917.33	10591.7	15581	9566.8	9190.96	7339.95	7623.2	5.005	70.898	134.981	199.023	44.192	38.141	40.703	46.044	10809.8	726.37	3251.74	7957.8
114	15637	11818.7	10787.7	16166	8146.98	7268.15	9168.41	7263.43	5.096	70.931	135.197	198.933	44.003	37.763	40.74	45.974	7489.99	4550.57	1619.31	8902.58
115	14944.8	11945.2	10711.8	19335	7362.51	6918.23	8779.99	8225.75	5.052	71.127	134.887	198.988	44.007	38.012	40.929	46.281	7582.24	5026.99	1931.84	11109.2
116	14618.9	14231.1	8776.87	21085	9872.75	7313.8	7418.63	7536.43	5.125	71.02	135.073	198.623	44.134	37.883	40.972	46.055	4746.19	6917.28	1358.24	13548.6
117	17426.2	8178.29	9304.43	14491	9279.54	8650.37	9177.21	7100.6	4.741	71.043	135.211	199.233	44.201	37.752	41.128	46.224	8146.62	-472.086	127.213	7390.4
118	15741.8	12528.9	8906.96	21323	9532.72	7676.99	8211.61	8362.9	4.78	70.792	135.149	198.686	43.955	38.046	41.12	45.894	6209.1	4851.89	695.348	12960.1
119	17598.6	7818.73	10175.2	13510	9383.96	7224.78	7004.38	7480.85	5.166	71.005	134.932	199.168	44.029	37.767	40.921	46.035	8214.68	593.949	3170.87	6029.15
120	14263.8	11093.6	10646.8	18849	9116.85	7203.41	8011.09	6739.85	5.24	70.935	134.817	198.92	44.037	37.902	41.091	45.974	5146.96	3890.21	2635.7	12109.1
121	14704.6	15168.3	9326.11	19543	8811.64	7460.43	8042.21	9068.8	5.325	70.897	135.008	198.77	43.902	37.886	40.773	46.075	5892.98	7707.89	1283.9	10474.2
122	16728.3	12421.3	8426.38	20180	9123.82	7758.89	7815.85	7678.12	5.3	71.149	134.943	198.989	44.212	37.828	40.897	46.175	7604.48	4662.43	610.524	12501.9
123	16033.8	11789.8	10290	21913	8055.02	8113.02	6325.02	8128.25	5.347	71.145	135.165	198.743	44.182	37.883	40.677	46.025	7978.81	3676.82	3964.95	13784.8
124	16520.9	16917.3	7224.03	19982	10010.1	6886.5	8546.3	7627.43	4.986	71.05	134.736	198.903	44.121	37.904	41.034	45.928	6510.71	10030.8	-1322.27	12354.6
125	15009	22864.5	9009.94	25161	9106.59	7925.6	8073.92	7591.68	5.391	70.958	135.353	198.74	43.983	37.748	40.723	46.1	5902.42	14938.9	936.021	17569.3
126	13447.6	14259	9383.92	21415	9271.11	6685.48	8099.16	8234.52	5.037	71.003	134.788	198.785	43.776	37.903	40.949	46.279	4176.47	7573.48	1284.76	13180.5
127	17739.6	13778.9	10168.9	19847	8824.46	7657.25	7878.98	6248.12	5.04	71.02	135.292	198.972	43.94	38.084	40.936	46.239	8915.11	6121.64	2289.95	13598.9
128	17062	10678.3	11977.4	21150	9414.01	7110.83	8517.52	7857.85	5.144	71.034	135.059	198.757	43.823	38.254	41.103	46.137	7648	3567.45	3459.89	13292.1
129	15578.4	14303.8	10930.4	19210	8414.46	6612.33	8722.15	7125.62	5.467	70.935	135.017	198.77	44.171	37.977	41.054	46.123	7163.9	7691.46	2208.29	12084.4
130	14013.5	14924.3	11783.2	17984	10587.2	8252.86	6979.43	7628.73	4.87	70.965	135.079	198.882	43.921	37.878	40.881	46.116	3426.3	6671.44	4803.77	10355.3
131	20754.2	11802.8	11357.7	21738	8666.91	6856.08	8667.25	6960.2	5.004	70.997	135.132	198.943	44.089	37.936	41.127	46.008	12087.3	4946.71	2690.47	14777.8
132	12208.6	14075.7	7516.71	22374	8823.73	8229.88	8405.67	8246.55	4.853	71.009	134.911	198.872	44.125	37.752	40.766	46.274	3384.84	5845.82	-888.956	14127.5
133	15741.8	20969.1	8785	24037	8034.13	8026.92	7519.92	7708.35	4.831	71.07	134.907	198.799	44.076	37.906	40.94	45.904	7707.69	12942.2	1265.09	16328.6
134	18404.7	11442.2	7189.7	18670	8923.39	6554.06	8191.06	6711.25	5.233	71.199	135.178	198.935	44.155	38	41.122	46.056	9481.34	4888.17	-1001.35	11958.8
135	21135.3	9728.09	12540.2	15748	9637.88	7534.24	7424.8	7275.45	5.056	71.159	134.865	198.781	44.21	37.947	40.799	46.055	11497.4	2193.85	5115.4	8472.55
136	15536.6	11489	11615.2	22681	7726.35	7023.76	8550.7	7319	5.143	70.891	134.861	198.852	44.157	38.144	41.199	46.276	7810.29	4465.29	3064.48	15362
137	17435.2	9637.45	13275.5	12341	8436.44	7047.06	9562.1	7150.32	5.201	71.025	135.054	198.922	44.092	37.858	40.796	46.19	8998.73	2590.39	3713.41	5190.68
138	18550.2	11169.3	9941.28	16825	9117.22	6841.19	8240.38	7887.75	5.104	70.932	135.096	198.992	44.032	37.876	41.119	46.138	9432.95	4328.14	1700.9	8937.25
139	14489.3	16242	6868.11	17477	8685.23	6945.74	7942.39	7068.75	5.056	70.701	135.115	199.254	44.24	37.826	40.567	45.782	5804.06	9296.29	-1074.28	10408.2
140	14404.7	19523.9	10211.4	24295	8442.67	6927.94	8184.3	7632.3	4.943	70.912	134.793	198.82	44.095	37.965	40.965	46.234	5962.06	12596	2027.08	16662.7
141	20337.1	13825.7	8951.22	21235	9344.39	7173.95	8486.41	7129.2	5.092	71.066	135.099	198.922	43.949	38.101	40.999	45.985	10992.7	6651.74	464.815	14105.8
142	13977.5	11245	9896.12	16882	7880.24	7562.4	8834.01	8091.85	5.091	71.068	134.852	198.826	44.143	38.158	40.817	46.138	6097.21	3682.62	1062.11	8790.15
143	22053	7542.83	14961.2	13678	10455	7481.15	7500.84	7333.3	5.261	70.892	135.013	199.005	44.104	37.928	41.064	45.958	11598	61.678	7460.32	6344.7
144	19683.2	9346.61	10214.1	16889	7923.84	8307.25	10208.3	7662.52	5.157	70.883	134.981	198.948	44.231	38.103	40.929	46.024	11759.4	1039.37	5.804	9226.48
145	24325.8	11424.3	9435.41	15363	8888.95	7702.56	7924.19	8141.9	5.261	71.18	135.001	198.902	44.163	38.023	40.932	46.26	15436.9	3721.74	1511.22	7221.1
146	15947	8917.33	10320.7	14634	7805.5	5995.99	7435.66	7325.82	5.325	71.119	134.867	198.866	44.177	38.034	40.933	45.747	8141.52	2921.34	2885.03	7308.18
147	15979.7	17679.3	8178.86	22317	8997.41	7293.4	8088.6	7018.7	5.297	71.257	134.944	198.755	43.981	38.034	40.945	46.226	6982.3	10385.9	90.266	15298.3
148	11894	12661.4	9070.46	22809	8499.46	7302.14	8453.82	6406.73	4.703	71.279	134.917	198.873	43.831	38.149	41.008	45.731	3394.56	5359.21	616.644	16402.3
149	18361.9	8630.48	9829.27	18037	9835.37	6110.91	6568.11	5893.55	5.171	71.012	134.97	198.861	44.196	37.948	41.033	46.029	8526.52	2519.57	3261.16	12143.5
150	9662.91	16551.8	8201.44	23814	8737.99	7180.75	7501.13	7074.27	4.861	71.129	135.05	198.813	44.354	38.034	40.888	46.058	924.915	9371.04	700.316	16739.7
151	13578.4	19051.8	7542.01	25070	8716.01	7932.72	7393.38	7278.7	4.933	70.933	134.851	198.874	43.855	37.942	40.848	46.086	4862.35	11119.1	148.622	17791.3
152	17546.8	15614.5	9006.32	18508	8282.55	7856.97	8068.93	6957.93	5.206	71.187	135.029	198.937	44.041	37.961	40.889	46.098	9264.23	7757.57	937.398	11550.1
153	20033.8	10661.4	10151.8	14761	9124.55	7795.14	7355.51	6912.75	5.287	71.125	134.937	199.055	43.999	37.891	40.862	46.13	10909.3	2866.21	2796.25	7848.25
154	17910.9	16286.9	9700.99	21049	9132.24	7392.13	8061.59	6686.23	5.179	71.013	134.864	198.992	44.058	37.849	41.068	46.241	8778.69	8894.72	1639.41	14362.8
155	14439.7	15539.8	7145.44	18467	9373.34	6821.12	7213.71	7085.98	4.939	71.039	134.714	198.852	43.966	37.832	40.847	46.114	5066.35	8718.73	-68.269	11381
156	15498.3	9699.2	9412.83	16767	9191.6	7495.07	7085.7	8401.9	4.948	71.083	135.045	198.945	44.027	38.013	41.061	45.96	6306.71	2204.13	2327.12	8365.1
157	15685.5	18316.7	8449.86	20285	8212.94	7809.71	8020.48	6873.43	5.353	70.847	134.92	198.719	43.96	37.993	40.904	45.984	7472.52	10507	429.381	13411.6
158	20020.3	8175.3	11124.7	14554	8021.31	6768.35	7701.06	8318.38	5.013	70.759	135.139	198.842	44.074	38.175	40.822	46.092	11999	1406.95	3423.6	6235.62
159	19262.7	8898.41	11620.6	13649	9702.37	6467.95	6601.58	7656.35	5.028	70.848	135.087	199.055	43.921	37.82	41.004	45.847	9560.32	2430.45	5019.02	5992.65
160	19032.7	7692.23	10638.7	16313	9417.31	7892.9	7701.65	7566.32	5.183	70.83	134.904	199.012	43.896	37.937	41.072	46.006	9615.39	-200.671	2937.01	8746.67
161	20819.6	12270.9	12452.6	13719	9696.5	6811.73	7873.98	7789.27	5.283	70.999	135.251	199.168	44.16	38.117	40.781	46.021	11123.1	5459.19	4578.59	5929.73
162	14044	15499	9634.15	20884	8813.11	9271.24	7595.37	8301.15	5.072	71.143	135.119	198.929	44.037	37.478	40.727	45.934	5230.86	6227.76	2038.78	12582.9
163	13316.8	15381.5	8435.41	21242	9931	6921.79	8334.62	7130.5	5.386	71.129	134.712	198.83	44.209	37.906	40.778	45.971	3385.8	8459.69	100.79	14111.5
164	13279.6	17769.9	8734.42	19768	8289.15	8153.16	7396.02	7204.6	5.005	70.836	134.945	199.001	44.192	38.1	41.243	46.215	4990.44	9616.76	1338.39	12563.4
165	14160.1	15830.7	7841.91	24614	9278.44	7804.53	8351.06	6736.93	4.97	70.945	135.131	198.811	43.999	38.069	41.011	46.06	4881.65	8026.15	-509.145	17877.1
166	13187.1	14763.9	7429.99	22795	8281.45	7684.76	8577.12	8112.98	5.12	70.96	134.955	198.708	44.043	37.982	40.857	45.977	4905.69	7079.18	-1147.13	14682
167	13434	15733.1	8418.25	17045	7217.05	7204.71	8179.9	7011.55	5.357	71.038	134.853	199.094	44.147	37.982	40.676	45.987	6216.99	8528.36	238.347	10033.5
168	15107.1	10490	9210.48	18250	9526.86	6540.46	8387.17	6932.25	5.229	70.944	135.018	198.903	44.024	37.862	41.098	46.058	5580.24	3949.58	823.306	11317.8
169	17336	8179.28	10885.3	14410	8639.8	7498.95	6968.27	7199.4	4.995	70.7	135.063	199.096	43.984	37.746	40.836	46.131	8696.17	680.329	3917.01	7210.6
170	16274	13321.7	10589	19866	8952.71	6992.36	7842.57	6978.73	5.248	71.05	134.748	198.672	43.815	38.003	40.942	46.067	7321.25	6329.36	2746.41	12887.3
171	14384.4	14566.7	5409.21	18397	7746.14	9165.07	6673.22	7452.57	4.96	71.022	134.886	199.005	44.084	37.938	41.204	46.157	6638.3	5401.67	-1264	10944.4
172	17228.9	11516.9	13201.4	16054	9301.16	6252.37	8432.39	6836.7	5.058	70.928	134.896	198.92	44.01	37.7	41.172	46.172	7927.71	5264.57	4769.06	9217.3
173	9480.27	14864.5	10929.5	18409	9118.69	7051.59	7720.73	6963.12	5.102	70.724	135.201	198.877	44.19	38.245	41.065	46.23	361.584	7812.95	3208.81	11445.9
174	14467.9	13286.9	11369.5	12755	9015.36	7661.78	7853.73	7814.95	5.179	71.138	135.049	199.009	44.17	37.965	40.864	46.199	5452.51	5625.07	3515.74	4940.05
175	15922.2	9328.68	8467.93	17202	8473.45	7109.86	8776.47	7306.98	5.044	71.105	135.43	198.873	44.187	37.666	40.741	45.87	7448.76	2218.82	-308.536	9895.02
176	13987.6	16028.9	7872.63	19326	9224.94	6620.74	6680.26	9027.52	5.366	70.984	135.142	198.904	44.086	38.051	40.821	46.058	4762.65	9408.14	1192.37	10298.5
177	15558.1	10226.1	12072.3	13439	7313.05	7775.72	6892.52	7953.07	5.203	71.056	135.022	198.851	43.865	37.886	40.792	45.91	8245.01	2450.37	5179.74	5485.93
178	13640.4	12592.6	9063.23	19371	7325.14	7350.37	6867.57	7772.05	5.023	70.896	135.198	198.883	44.102	37.873	41.009	46.189	6315.22	5242.26	2195.66	11599
179	17138.7	9627.49	10135.5	17376	7598.48	7590.56	7527.85	6727.18	5.125	71.136	134.828	198.842	44.026	38.181	40.923	46.041	9540.19	2036.93	2607.66	10648.8
180	14111.6	11388.4	9976.51	15867	8800.28	7738.82	7112.42	7912.12	4.861	70.991	135.142	198.845	43.969	37.984	40.893	45.918	5311.33	3649.63	2864.09	7954.88
181	16314.5	10992	8969.29	21348	9148.73	6805.58	9025.43	6161.35	5.148	70.964	135.176	199.024	43.993	37.931	40.849	46.288	7165.81	4186.45	-56.142	15186.6
182	16196.2	12646.4	9086.72	22975	9663.9	7497.01	7952.08	7020.65	5.179	71.02	135.128	198.978	44.084	37.955	41.068	46.058	6532.27	5149.4	1134.64	15954.4
183	15441.9	12646.4	11387.5	18038	7763.73	7276.24	7634.42	6089.2	5.071	70.854	135.156	198.888	44.24	38.072	40.907	46.173	7678.21	5370.17	3753.12	11948.8
184	17830.9	13006	9465.22	24915	8189.12	7500.57	6853.48	8148.73	4.967	70.716	134.867	198.811	44.25	37.935	41.005	46.063	9641.77	5505.4	2611.74	16766.3
185	11202.9	19773.9	6675.7	30210	8865.87	8742.31	7921.25	6968.65	5.463	70.936	135.117	198.773	43.793	37.854	41.257	45.799	2337.06	11031.6	-1245.55	23241.3
186	16836.5	8810.76	10754.3	12861	7956.09	7153.88	6576.92	7303.4	5.056	70.918	135.103	198.776	44.079	38.063	40.864	46.098	8880.44	1656.87	4177.37	5557.6
187	12912.1	19688.2	9157.18	20200	8538.67	6876.15	7826.13	8067.15	5.188	70.962	134.887	198.707	43.942	38.2	40.85	46.333	4373.39	12812.1	1331.05	12132.9
188	14218.7	14957.2	7771.45	21569	7457.41	6489.97	7583.63	6904.62	4.875	71.06	135.051	199.015	43.946	37.862	40.842	46.13	6761.3	8467.21	187.827	14664.4
189	12389	16859.6	6106.59	20708	7650.51	7777.34	8941.17	7684.3	5.115	71.047	135.005	198.658	44.228	37.873	40.781	46.232	4738.44	9082.22	-2834.57	13023.7
190	11550.2	18786.9	7354.11	19134	9021.96	6991.71	8018.43	7691.12	4.863	71.041	135.028	198.83	44.017	37.828	40.891	45.906	2528.21	11795.1	-664.317	11442.9
191	15443.1	17503	8584.46	21815	7694.48	7835.28	8285.59	6985.88	5.237	71.054	135.07	198.909	44.015	37.986	41.044	45.961	7748.59	9667.7	298.871	14829.1
192	14525.4	19823.7	11345.1	20687	7788.27	7670.19	7711.34	6902.68	5.149	70.986	135.095	198.878	44.244	38.126	40.897	46.287	6737.09	12153.5	3633.74	13784.3
193	17137.5	15244	8981.93	22894	8590.33	6995.59	7180.24	7563.73	5.144	71.174	134.994	198.846	44.145	37.796	40.8	45.983	8547.21	8248.43	1801.69	15330.3
194	14067.6	17869.5	6971.09	24506	9133.34	6354.33	7707.81	7471.1	4.805	70.778	135.131	199.015	44.033	37.878	41.031	45.929	4934.3	11515.2	-736.72	17034.9
195	12860.2	14963.1	7061.43	18340	9134.81	6722.71	7142.37	6511.38	5.379	70.909	135.137	198.887	43.935	38.029	40.979	45.956	3725.39	8240.44	-80.938	11828.6
196	15212	12450.2	13043.4	16494	9309.22	6954.81	7614.75	6550.7	5.042	70.906	135.017	198.788	44.1	38.104	40.76	45.847	5902.73	5495.39	5428.61	9943.3
197	17237.9	12951.2	5694.67	14860	8344.84	6964.84	7979.09	7688.85	5.21	70.947	134.99	198.842	43.952	37.958	41.013	46.045	8893.04	5986.35	-2284.42	7171.15
198	13709.1	18123.5	7161.7	20762	7649.41	6609.41	7852.26	6925.75	5.23	71.023	134.987	198.956	44.071	37.919	40.843	45.888	6059.72	11514.1	-690.559	13836.2
199	13159	11509	8448.06	23150	8924.49	6927.61	8214.25	6990.43	5.028	70.618	134.687	198.741	43.845	37.781	40.966	46.115	4234.47	4581.35	233.808	16159.6
200	20525.4	12499	7395.66	20537	8008.85	7707.42	7836.11	8300.83	4.886	71.015	134.965	198.861	44.079	37.9	40.827	46	12516.5	4791.58	-440.446	12236.2
201	18403.6	11537.8	9537.49	17234	8754.48	7532.94	8291.46	7002.77	5.176	71.368	135.031	198.955	44.002	38.026	40.913	46.169	9649.13	4004.91	1246.03	10231.2
202	15924.5	6492.03	10645.9	14449	8795.15	5407.82	8425.34	6325.48	5.278	70.921	134.977	199.004	44.279	38.103	40.529	46.049	7129.31	1084.21	2220.55	8123.52
203	18939.1	12060.8	10944	18697	8610.85	6704.26	6704.04	7041.45	5.003	71.107	135.014	199.069	44.214	37.827	40.916	46.083	10328.3	5356.5	4239.95	11655.5
204	16768.9	9003.98	11393.9	17774	9537.85	7604.16	7402.48	7027.8	4.99	71.152	135.179	198.972	44.141	38.015	40.685	45.87	7231.03	1399.83	3991.37	10746.2
205	17484.8	8402.39	11093.9	14453	9816.32	6465.69	7134.73	6860.1	5.024	71.122	134.949	198.981	44.044	37.958	40.749	46.188	7668.46	1936.7	3959.21	7592.9
206	14004.5	14252	8420.96	21980	8310.4	7480.5	8095.94	7792.85	5.057	70.785	135.036	198.651	43.969	37.913	41.094	45.986	5694.11	6771.49	325.023	14187.1
207	13405.9	13053.8	10331.5	18354	7557.44	7528.41	6541.69	6492.52	5.132	71.141	134.822	198.739	43.908	37.765	40.814	45.911	5848.42	5525.37	3789.84	11861.5
208	13639.2	9244.02	11792.2	15905	8819.33	8133.09	7756.84	6502.27	5.092	70.976	134.899	198.896	44.194	37.781	40.881	46.021	4819.9	1110.93	4035.39	9402.73
209	15656.1	17601.6	7438.12	20926	8130.5	7542.01	7757.14	8093.15	5.102	70.885	134.992	198.787	44.106	38.034	41.041	45.981	7525.65	10059.6	-319.014	12832.9
210	16113.9	13678.3	10437.2	19261	9713.36	6856.08	8208.67	9887.48	4.906	70.806	134.951	198.818	44.2	37.963	40.794	46.123	6400.51	6822.21	2228.55	9373.52
211	12307.8	16472.1	7230.35	21309	9428.66	6811.4	8982.27	9469.2	5.004	71.176	134.866	198.914	44.281	37.986	40.863	45.917	2879.11	9660.71	-1751.92	11839.8
212	12827.5	13624.5	8770.55	23173	9367.11	6766.41	7042.25	6824.35	5.023	70.926	135.144	198.693	44.056	37.727	40.641	45.981	3460.4	6858.09	1728.3	16348.6
213	13345	18342.6	6610.66	22753	9571.19	7568.88	7599.77	7820.8	4.97	71.031	135.209	198.809	43.761	38.046	40.723	45.974	3773.79	10773.8	-989.114	14932.2
214	13551.3	16942.2	7714.54	21089	9492.42	6668	8987.85	8219.9	4.918	71.024	134.825	199.024	43.983	37.9	41.086	46.063	4058.88	10274.2	-1273.31	12869.1
215	17799.3	15816.7	9658.54	20875	7651.97	7576.32	8133.51	6243.57	4.87	71.061	135.042	198.707	43.998	38.163	41.093	46.283	10147.4	8240.41	1525.02	14631.4
216	13145.4	15278.9	9206.86	18505	10482.8	7706.77	7327.91	6939.73	5.027	70.891	134.847	198.838	43.681	37.811	40.888	46.012	2662.63	7572.11	1878.95	11565.3
217	21874.9	8763.94	12469.7	20499	9064.09	7920.42	7940.04	8217.95	5.171	70.757	134.951	198.938	43.931	38.028	40.819	45.915	12810.8	843.526	4529.7	12281
218	16130.8	9897.41	10551.9	23764	9515.5	6533.02	8277.67	7648.23	5.04	70.952	134.997	198.948	44.021	37.886	40.975	45.797	6615.28	3364.39	2274.28	16115.8
219	13245.8	16609.6	11454.4	25266	9014.99	8621.24	8051.02	7447.7	4.767	70.904	135.042	198.88	44.171	38.125	41.345	46.085	4230.78	7988.32	3403.36	17818.3
220	12326.9	15718.1	7893.41	21698	8878.69	6636.6	7883.97	7169.5	5.03	70.79	135.015	198.706	44.189	37.833	40.709	46.296	3448.25	9081.52	9.44	14528.5
221	15041.7	17736.1	8489.61	22124	8797.35	7373.03	8061.59	8007.35	5.094	71.298	135.089	198.788	44.27	37.823	41.055	46.043	6244.36	10363	428.026	14116.6
222	15232.2	15994	8231.26	23239	9199.3	7236.75	7494.08	8541.98	5.04	70.961	134.958	198.839	44.027	38.066	41.246	45.922	6032.95	8757.27	737.173	14697
223	12931.2	13935.3	9488.71	23774	8955.27	7825.25	8929.43	7633.6	4.898	71.082	134.9	198.793	43.985	37.825	40.787	46.103	3975.96	6110.01	559.282	16140.4
224	13744.1	21187.3	7389.34	19468	8654.45	7881.25	8105.62	8347.62	4.927	70.785	134.794	198.823	44.084	37.908	40.902	46.11	5089.63	13306	-716.282	11120.4
225	11146.6	16393.4	8543.81	17774	9760.63	6282.15	8253.59	7776.6	5.279	70.901	134.869	199.068	43.782	38.223	41.051	46.326	1385.94	10111.3	290.221	9997.4
226	15696.7	13125.5	7587.17	27503	8460.63	6575.75	7657.02	7040.8	5.185	71.135	135.103	198.807	44.205	37.803	41.2	46.105	7236.1	6549.75	-69.85	20462.2
227	14357.4	21999	7999.1	19238	7239.04	7765.36	6592.77	7712.25	5.13	70.961	134.987	198.925	43.906	38.07	40.94	45.955	7118.35	14233.6	1406.32	11525.8
228	13567.1	17472.1	7955.74	24060	7662.6	8052.49	8169.04	6596.52	5.034	71.068	134.927	198.908	43.976	38.054	40.995	46.184	5904.48	9419.62	-213.301	17463.5
229	11744.1	14800.8	8725.38	20923	8419.95	7545.24	7256.86	8867.95	5.301	70.944	135.053	199.002	44.269	38.01	41.043	46.151	3324.13	7255.55	1468.52	12055
230	11923.3	18782.9	7424.57	20851	8467.59	6572.83	7258.92	7154.23	5.036	71.146	135.032	198.715	44.012	38.031	41.112	46.033	3455.75	12210	165.65	13696.8
231	13543.4	12211.2	9969.29	20443	7742.11	7324.8	6982.07	6728.48	5.108	71.086	134.956	198.89	43.959	37.836	40.842	45.799	5801.3	4886.35	2987.22	13714.5
232	14614.4	12479.1	8792.23	19173	8936.58	7270.74	7038.44	7422.02	5.042	70.825	135.002	198.921	44.011	37.726	41.064	46.098	5677.85	5208.34	1753.79	11751
233	12476.9	15488	7682.93	20600	8465.02	6341.06	7106.55	7224.1	5.138	70.821	135.009	198.936	44.035	37.82	40.932	46.067	4011.87	9146.99	576.378	13375.9
234	15714.8	13683.3	8331.53	18569	8692.93	6761.55	7383.11	7634.9	5.125	70.905	135.124	198.894	43.937	38.014	40.618	46.024	7021.84	6921.71	948.419	10934.1
235	19712.5	8937.25	11091.2	13723	9060.8	6630.13	8225.41	7105.48	4.866	71.282	134.957	199.003	44.153	38.134	40.73	46.201	10651.7	2307.12	2865.83	6617.52
236	14536.6	13987.1	8014.45	21810	7572.46	6290.56	7610.34	7641.4	4.978	71.174	135.055	198.933	44.181	38.021	41.247	45.903	6964.18	7696.49	404.11	14168.6
237	17213.1	11048.8	9980.13	17186	7426.64	6704.26	7974.1	6911.77	5.05	70.848	135.219	198.765	43.838	38.06	41.026	46.233	9786.44	4344.55	2006.03	10274.2
238	16586.2	9563.75	11699.2	11977	9083.15	7602.54	7735.12	7399.6	4.967	71.04	135.017	198.871	44.07	37.712	40.962	45.92	7503.1	1961.2	3964.07	4577.4
239	16128.5	8324.7	11219.5	9530	7980.64	8214.34	8105.62	6140.55	5.322	71.035	135.073	198.885	44.168	37.924	40.702	45.922	8147.89	110.359	3113.89	3389.45
240	17609.9	12665.3	9280.94	18559	7936.67	8536.43	8363.1	7839.98	5.237	70.961	134.74	198.96	43.958	37.853	40.976	46.209	9673.25	4128.91	917.841	10719
241	14299.9	17967.1	7139.11	26300	6767.84	8357.1	6902.21	6891.3	4.758	70.981	134.779	198.668	43.925	37.933	40.811	46.049	7532.05	9610.03	236.902	19408.7
242	12998.9	14083.7	9832.88	22421	8510.46	7509.96	8733.6	8003.77	5.108	70.971	134.994	198.875	43.951	37.811	41.206	45.992	4488.42	6573.7	1099.28	14417.2
243	12447.6	16277.9	10680.2	23298	8924.13	8307.57	6668.23	7881.9	5.041	70.996	135.001	198.73	44.193	38.198	40.907	46.177	3523.45	7970.32	4011.99	15416.1
244	12746.3	14670.3	6027.1	24848	8079.57	7994.87	8958.2	7719.73	4.914	70.867	135.119	198.923	44.232	37.884	40.754	45.901	4666.77	6675.45	-2931.1	17128.3
245	16042.8	14371.5	7879.85	22338	8442.31	6479.93	8527.51	6422	4.762	71.133	135.016	198.784	43.962	37.636	40.826	45.766	7600.54	7891.58	-647.65	15916
246	19782.4	11354.6	12970.2	16132	8801.75	6316.78	7769.47	6335.55	4.994	70.925	134.998	198.967	44.057	38.012	40.906	46.16	10980.7	5037.8	5200.72	9796.45
247	17721.5	10303.8	11584.5	17007	9254.99	7339.04	6433.94	6963.77	5.287	70.948	135.006	198.874	44.046	37.76	40.832	46.178	8466.55	2964.74	5150.52	10043.2
248	18656.1	8883.47	9497.74	13076	8503.13	8140.86	8077.44	7773.35	5.046	71.158	134.744	198.915	44.19	37.797	40.882	46.07	10153	742.605	1420.3	5302.65
249	9009.02	14496	6320.69	27540	7146.7	7518.38	6964.75	7648.88	5.105	70.783	135.122	198.688	43.674	37.822	41.016	46.008	1862.32	6977.64	-644.06	19891.1
250	16717	13734.1	8182.48	20266	8387.34	6565.39	7803.52	6754.15	5.258	70.933	134.975	198.853	44.051	37.831	40.922	45.836	8329.68	7168.68	378.952	13511.9
251	12011.3	13922.3	9369.47	17898	7396.59	6746.66	7933.58	6534.12	4.955	70.924	135.073	198.916	44.061	37.886	41.388	45.881	4614.68	7175.65	1435.88	11363.9
252	20011.3	12984.1	9185.18	24072	9604.9	8665.59	6927.76	7355.4	4.932	71.097	134.934	198.775	44.214	37.795	40.563	45.667	10406.4	4318.48	2257.43	16716.6
253	12302.1	18746	7578.14	20311	8765.47	6544.35	8398.33	7256.27	4.882	70.958	134.869	198.851	43.905	38.173	41.074	46.232	3536.67	12201.7	-820.189	13054.7
254	13264.9	16680.3	8822.04	20052	7752.37	6650.52	7696.36	7664.15	5.078	70.846	135.162	198.632	43.867	37.975	40.807	45.91	5512.57	10029.8	1125.68	12387.9
255	14906.4	20021.9	9238.48	24000	8007.75	8066.41	7941.22	8635.58	4.91	71.029	135.025	198.731	43.955	37.949	40.846	46.012	6898.68	11955.5	1297.27	15364.4
256	18080	14073.7	7455.28	19978	9940.9	7807.77	8014.9	6692.4	5.008	70.88	135.318	198.605	44.032	37.985	40.805	46.096	8139.15	6265.94	-559.62	13285.6
257	20909.8	8124.5	15033.4	14111	9256.45	7714.54	7678.75	8014.82	5.118	71.078	135.175	198.942	44.258	38.228	40.72	46.095	11653.4	409.96	7354.68	6096.18
258	16251.4	14811.8	8904.25	20758	9428.3	7481.8	8628.21	7174.05	5.113	71.065	134.977	198.89	44.128	38.007	40.972	46.122	6823.11	7329.95	276.039	13584
259	14638.1	15148.4	8401.99	20043	8723.34	7636.2	7118	8252.08	4.993	70.989	135.018	198.843	44.176	38.031	40.577	45.904	5914.77	7512.2	1283.99	11790.9
260	13048.5	16558.8	8448.96	23353	7917.25	7921.39	8761.5	7225.4	4.948	70.957	134.909	198.903	43.757	37.7	40.97	45.819	5131.23	8637.38	-312.533	16127.6
261	16144.3	7525.9	8982.84	17509	10223.4	7486.33	7948.56	6739.2	4.833	71.078	135.081	199.145	44.273	38.029	41.19	46.161	5920.91	39.567	1034.28	10769.8
262	18835.4	6565.74	12243.9	12067	7972.58	6956.42	7055.17	6969.62	4.952	71.14	135.196	198.892	44.254	38.145	40.962	45.98	10862.8	-390.686	5188.73	5097.38
263	16001.1	13289.8	8579.04	19820	8392.48	6984.59	7686.09	7055.43	4.903	70.943	134.918	198.858	43.992	37.93	40.876	46.076	7608.65	6305.25	892.954	12764.6
264	15805	17733.1	9553.75	23037	8820.43	9656.12	8276.2	7156.5	5.179	70.86	134.894	198.845	44.188	37.817	41.293	45.804	6984.53	8076.94	1277.55	15880.5
265	15312.3	11965.1	7971.09	22525	9378.47	7410.91	7314.99	7271.23	5.037	70.906	135.092	198.838	44.163	37.779	41.144	45.892	5933.82	4554.23	656.098	15253.8
266	12841	18926.3	5609.76	25024	8126.1	7793.85	6348.8	7243.6	5.124	70.863	135.099	198.775	43.887	38.088	40.879	45.977	4714.94	11132.4	-739.046	17780.4
267	11430.7	15019.9	7523.94	20035	8935.49	6398.36	7770.94	8822.45	4.968	71.204	134.867	198.729	43.889	38.346	40.956	46.275	2495.18	8621.56	-246.995	11212.5
268	15024.8	14797.8	9617.89	21110	9355.38	7730.08	7142.95	7309.9	5.022	70.869	135.185	198.917	44.073	37.982	40.999	45.874	5669.42	7067.73	2474.93	13800.1
269	13234.5	14802.8	8962.96	24264	8831.43	6433.96	8047.49	7375.88	4.988	70.987	135.156	198.81	44.128	37.813	40.868	46.145	4403.07	8368.83	915.47	16888.1
270	17092.4	15814.7	7984.64	21465	6804.85	6553.09	8345.48	7693.4	5.068	70.952	135.14	198.686	44.151	37.833	40.652	46.055	10287.6	9261.65	-360.839	13771.6
271	11214.2	11858.6	6665.76	23049	9845.26	7990.66	7278	7561.12	5.14	70.958	135.047	198.748	44.074	38.109	41.238	45.909	1368.94	3867.9	-612.239	15487.9
272	13653.9	15126.5	8098.46	22485	9400.08	6742.78	7983.78	8183.5	4.898	70.856	135.109	198.716	43.83	37.734	40.973	45.982	4253.81	8383.72	114.679	14301.5
273	15553.6	13485.1	6528.45	20308	9348.79	6537.55	7846.39	7806.82	5.36	71.019	134.8	198.921	43.972	38.108	40.865	46.167	6204.76	6947.51	-1317.93	12501.2
274	13862.5	14809.8	6293.59	21664	8308.2	8368.75	8450.29	6052.48	5.001	70.774	134.893	198.844	44.123	37.862	41.072	45.836	5554.26	6441.01	-2156.71	15611.5
275	10192.8	15757	10096.7	24631	8595.1	8006.52	7598.89	7725.9	5.157	70.972	134.806	198.903	43.94	38.122	40.974	46.257	1597.69	7750.45	2497.76	16905.1
276	15604.3	14492	7483.29	15899	8655.19	8003.29	7186.4	5810.35	5.168	71.078	135.161	198.796	44.482	38.048	41.164	45.791	6949.1	6488.74	296.883	10088.6
277	14602	16559.8	8355.01	22336	7780.21	7973.18	7342.01	7439.57	5.241	70.963	134.843	198.918	44.054	37.88	40.956	45.975	6821.81	8586.58	1013.01	14896.4
278	13089.1	16916.3	6528.45	20489	9329.37	7737.85	7178.48	7533.18	5.143	71.196	134.981	198.865	43.973	37.78	40.997	45.959	3759.7	9178.49	-650.022	12955.8
279	17785.8	17682.3	10600.7	21036	8337.51	7387.28	7290.33	8383.7	5.16	70.929	135.008	198.861	44.027	37.978	41.1	46.102	9448.28	10295	3310.39	12652.3
280	18303.3	9900.4	11125.6	12473	7436.89	6669.94	8324.34	6580.93	5.15	70.803	134.994	198.901	44.171	38.183	40.758	46.103	10866.4	3230.45	2801.22	5892.07
281	19700.1	10952.2	9154.47	15684	7459.98	7208.59	6960.64	6952.73	5.079	70.984	134.874	198.993	44.165	38.117	40.905	45.971	12240.1	3743.6	2193.84	8731.27
282	16060.9	10210.2	11483.3	14901	8076.64	7489.24	7228.98	7450.3	5.195	71.108	135.119	199.16	44.121	37.838	40.757	46.191	7984.24	2720.92	4254.31	7450.7
283	12039.5	11543.8	10009.9	18641	10081.2	7097.88	7233.67	7822.1	5.107	70.845	135.294	198.982	44.273	37.829	40.979	45.859	1958.23	4445.94	2776.26	10818.9
284	14509.6	11587.6	7793.14	17857	9457.98	8541.28	7858.13	7317.7	5.304	71.067	135	198.996	43.764	37.938	41.127	45.967	5051.61	3046.36	-64.994	10539.3
285	18890.6	13832.7	8877.15	15957	8371.96	6161.73	7282.41	7999.88	5.1	70.887	135.086	198.774	44.296	38.114	41.19	46.175	10518.7	7670.94	1594.74	7957.12
286	11903	14902.4	7470.64	22696	8515.59	8104.28	8246.84	7912.77	5.059	70.955	134.958	198.832	44.239	37.92	41.021	46.122	3387.46	6798.11	-776.196	14783.2
287	11712.5	14277.9	6664.86	20135	8520.35	7375.3	8795.26	6509.43	5.117	70.895	135.22	198.671	43.763	37.79	41.005	45.916	3192.16	6902.59	-2130.4	13625.6
288	13446.4	15162.4	12225.8	17632	8938.42	7496.04	8099.46	6449.62	4.885	71.024	134.94	198.864	43.94	38.051	41.108	45.893	4508.03	7666.31	4126.38	11182.4
289	10720.4	14386.5	9165.31	21205	9293.83	7117.31	7872.22	8098.35	4.985	71.039	134.897	198.845	44.205	38.09	40.892	45.971	1426.58	7269.15	1293.09	13106.6
290	13152.2	15974.1	7062.33	24226	9252.79	7243.23	7278.3	7472.4	5.009	71.09	135.243	198.928	44.128	38.086	40.824	46.241	3899.41	8730.88	-215.966	16753.6
291	17349.5	12255	10378.5	14957	7871.81	6856.08	7342.01	7692.1	5.015	70.918	134.895	198.994	44.293	38.253	40.909	46.036	9477.68	5398.9	3036.49	7264.9
292	14793.7	19594.6	7176.15	18911	8735.06	6142.95	6902.51	7405.77	4.924	71.053	135.109	198.926	43.759	37.975	41.028	46.042	6058.62	13451.7	273.645	11505.2
293	11621.2	17372.5	9370.37	21940	9105.86	6878.73	7780.92	8092.5	5.219	70.816	135.135	198.978	43.984	37.854	40.882	46.069	2515.33	10493.8	1589.45	13847.5
294	12369.8	18913.3	7704.61	21210	8738.73	7634.59	7874.57	7074.93	5.294	70.919	135.066	198.964	44.154	37.782	41.126	45.963	3631.06	11278.8	-169.963	14135.1
295	18199.5	15103.6	9975.61	19690	7687.51	6935.71	7747.15	7822.1	5.044	70.844	134.986	198.834	43.932	38.081	40.836	46.132	10512	8167.88	2228.45	11867.9
296	13956	16480.1	7366.76	21504	9183.54	7322.21	7907.75	6019.98	5.296	70.859	135.08	198.929	43.716	38.103	41.198	45.887	4772.49	9157.87	-540.988	15484
297	12861.3	15424.3	10122	25522	7602.14	7004.66	7452.69	7626.12	4.8	71.21	135.368	198.805	44.009	37.746	40.939	45.938	5259.19	8419.65	2669.26	17895.9
298	15370.9	11102.6	8522.13	16352	9394.95	7463.35	7345.53	6791.85	5.053	71.027	134.761	198.762	43.852	37.949	41.217	46.274	5975.96	3639.24	1176.6	9560.15
299	13806.1	12595.6	7457.09	15946	8890.42	7425.8	7572.76	8028.48	5.064	71.124	134.882	198.882	44.031	37.924	40.763	46.325	4915.67	5169.82	-115.672	7917.52
300	14384.4	8896.41	10263.8	17547	8207.07	7565.64	8663.73	6237.07	5.35	71.125	135.174	198.747	44.243	37.76	40.86	45.936	6177.37	1330.78	1600.05	11309.9
301	16451	16830.7	6197.83	21552	8037.43	7246.79	8617.64	7844.52	5.01	71.037	135.206	198.528	44.223	37.82	41.004	45.686	8413.53	9583.89	-2419.8	13707.5
302	22834.3	9082.67	9531.17	12507	9426.47	6990.09	9215.97	7240.68	5.088	71.068	134.959	198.992	43.85	38.039	40.875	46.159	13407.8	2092.58	315.199	5266.32
303	14434	12540.8	8101.17	20964	7891.6	7289.19	7232.5	6409	4.944	70.778	134.728	198.747	44.192	38.23	41.036	46.179	6542.45	5251.64	868.677	14555
304	14797.1	18603.6	10510.4	23452	8592.17	7831.4	7753.91	8975.85	5.246	70.794	134.791	198.835	43.726	38.018	41.027	46.163	6204.9	10772.2	2756.48	14476.1
305	13296.5	11276.9	10662.1	17919	8860.01	6966.46	6401.35	6648.85	5.265	70.722	135.387	198.78	43.996	37.877	41.003	46.027	4436.5	4310.43	4260.8	11270.1
306	14551.3	13905.4	8542	21119	8152.85	7309.26	7557.5	7620.93	5.202	70.806	135.147	198.977	43.924	37.971	40.807	46.003	6398.45	6596.12	984.508	13498.1
307	15010.1	16127.5	8881.66	23329	7722.69	7030.23	6873.15	7339.48	5.027	70.738	135.072	198.987	43.946	38.131	40.871	46.181	7287.46	9097.26	2008.51	15989.5
308	13623.5	16084.7	8314.36	25453	8865.14	7231.9	6877.26	7033	5.06	70.768	134.836	198.737	44.01	38.13	40.951	46.272	4758.31	8852.76	1437.11	18420
309	12889.5	15811.8	7061.43	18473	8101.92	7789.97	8300.86	6818.82	4.963	70.929	134.749	198.89	43.851	38.14	40.939	46.301	4787.6	8021.79	-1239.43	11654.2
310	18073.3	14149.4	10794	17944	9505.98	6848.95	7238.37	7371	4.83	70.888	134.849	198.722	43.937	37.63	40.941	46.06	8567.31	7300.45	3555.67	10573
311	14213.1	16172.3	9401.08	22158	7451.92	8139.57	7855.49	7768.48	5.18	70.815	134.865	198.96	44.031	38.131	40.99	46.122	6761.16	8032.74	1545.6	14389.5
312	13135.3	18711.2	7338.75	26581	8267.53	8601.17	6892.23	7689.82	5.272	70.98	135.046	198.972	44.328	37.873	40.924	46.006	4867.76	10110	446.522	18891.2
313	14872.6	13761	8602.53	17558	9302.99	7737.2	8094.76	7503.6	5.005	70.891	134.897	198.708	44.39	37.968	41.192	46.207	5569.62	6023.76	507.769	10054.4
314	17157.8	14593.6	6363.14	19920	8913.87	7632.97	7687.26	9086.67	4.932	70.918	134.992	198.916	44.238	37.918	40.858	46.162	8243.97	6960.66	-1324.12	10833.3
315	16037.2	17033.9	7554.65	20903	8533.17	6695.84	7537.24	7219.23	5.272	70.938	134.808	198.769	44.015	37.838	41.009	45.791	7504.03	10338	17.412	13683.8
316	16195	14401.4	10577.2	19234	8097.52	7613.55	8429.45	8743.8	5.242	70.975	134.936	198.932	44.19	37.81	40.877	46.097	8097.52	6787.85	2147.79	10490.2
317	18016.9	9422.31	8551.04	14611	7798.53	7258.12	7622.09	6397.3	5.19	70.853	134.924	198.895	44.116	38.044	40.868	46.073	10218.4	2164.19	928.952	8213.7
318	13252.5	13893.4	10588.1	14646	8251.04	6608.12	7389.27	6825.32	5.057	70.872	134.842	198.913	44.152	37.906	40.961	46.139	5001.49	7285.31	3198.8	7820.68
319	20439.7	9532.87	9528.45	16432	9053.83	8654.58	8253.3	7478.25	5.133	71.114	135.029	198.781	44.062	37.911	40.662	46.009	11385.9	878.287	1275.16	8953.75
320	12189.4	15153.4	7152.66	22280	7843.97	8509.24	8021.36	7109.38	5.417	71.007	134.961	198.784	43.971	37.698	41.023	46.255	4345.43	6644.15	-868.698	15170.6
321	14274	14354.6	7455.28	26217	7712.43	7563.37	8164.63	7596.55	5.237	71.011	134.999	198.843	43.975	37.816	41.05	46.016	6561.53	6791.21	-709.349	18620.5
322	13987.6	11041.8	8019.87	18935	8919.73	7076.19	7766.24	6851.65	5.013	70.88	135.08	198.741	44.165	38.18	41.102	46.282	5067.87	3965.64	253.636	12083.4
323	14991	16025.9	9089.43	21380	9033.32	7146.76	7044.6	7825.68	5.292	70.875	134.949	198.694	44.046	38.046	40.812	46.289	5957.67	8879.13	2044.83	13554.3
324	17536.6	13819.7	10691.1	12411	8272.29	8495.32	7598.31	7644.98	5.267	70.786	135.068	199.106	43.988	37.84	40.893	46.05	9264.35	5324.4	3092.75	4766.02
325	22956	8976.1	11006.3	16250	8219.53	7985.48	7574.53	6951.1	5.08	70.979	135.002	198.906	43.83	38.345	40.89	45.955	14736.5	990.613	3431.8	9298.9
326	15529.9	11339.6	10794.9	17575	8721.5	7905.85	7539	8108.43	5.197	71.071	134.941	198.742	44.142	37.864	41.273	46.02	6808.37	3433.79	3255.94	9466.58
327	13471.3	10006	14592.6	14268	10586.5	6672.86	8640.54	7448.68	5.164	70.968	135.077	198.974	44.221	37.905	41.004	46.156	2884.75	3333.12	5952.06	6819.32
328	22227.7	9323.7	10275.5	14403	8270.1	7044.8	9320.48	7301.12	5.306	70.958	134.956	198.8	44.087	37.661	41.001	45.875	13957.6	2278.91	955.036	7101.88
329	13142.1	9788.84	10656.7	13218	10437.7	7120.54	7841.98	7761.65	5.004	70.952	134.875	198.732	44.3	37.835	41.041	46.059	2704.31	2668.3	2814.75	5456.35
330	12837.7	8290.84	11832	16372	8014.35	6282.79	7039.61	6878.62	5.341	70.826	135.108	198.944	44.08	38.208	40.827	46.135	4823.31	2008.04	4792.37	9493.38
331	12514.1	18210.2	7902.44	18609	8799.18	6963.22	8198.69	6957.93	5.192	70.811	135.034	198.78	43.968	37.971	40.785	45.92	3714.91	11246.9	-296.25	11651.1
332	13520.9	12788.8	7986.45	23940	8024.24	7074.25	7133.85	7569.9	5.187	71.17	134.848	198.821	44.24	37.996	41.065	46.02	5496.62	5714.59	852.597	16370.1
333	12370.9	14532.9	6501.35	18596	8295.01	6921.79	7568.65	6231.88	5.185	71.082	135.123	198.884	44.008	37.876	40.631	46.017	4075.9	7611.08	-1067.3	12364.1
334	15812.9	12323.7	10737.1	18094	9974.24	7569.52	6806.5	6806.8	4.985	71.218	134.967	198.825	43.968	38.089	40.873	46.061	5838.61	4754.18	3930.62	11287.2
335	16708	7915.34	9794.94	16413	8116.94	7677.64	7171.73	6653.07	5.138	71.191	134.724	198.736	44.103	38.154	41.12	46.238	8591.07	237.699	2623.22	9759.92
336	19732.8	16243	9671.18	21435	8289.15	7614.52	6778.32	6991.73	5.135	70.835	135.112	198.694	44.112	37.868	40.727	46.148	11443.7	8628.51	2892.86	14443.3
337	12091.3	17142.4	7738.03	17251	9488.02	6784.21	7525.79	7170.15	5.078	71.132	135.133	199.119	44.072	38.275	41.132	46.27	2603.3	10358.2	212.24	10080.9
338	15463.4	9000	10689.2	15830	7464.74	7707.1	8029.29	6726.52	4.958	71.149	134.791	198.805	44.179	37.869	40.76	45.977	7998.62	1292.9	2659.96	9103.48
339	16127.4	13531.9	10928.6	17674	8709.78	7210.86	7673.17	6715.48	5.152	70.992	135.153	198.938	44.235	37.664	41.018	45.831	7417.62	6321.02	3255.47	10958.5
340	13867	11356.6	12662.1	18485	8256.91	6183.74	7164.39	7617.02	4.947	71.108	134.901	199.076	44.053	38.027	40.988	45.95	5610.06	5172.83	5497.76	10868
341	20420.5	9681.27	10474.3	14006	9502.31	6892.65	6849.07	6772.02	5.181	71.042	135.104	198.837	44.125	38.057	40.622	46.098	10918.2	2788.62	3625.18	7233.98
342	20095.8	9619.52	10483.3	15271	9543.35	6097.31	7868.7	7980.7	5.249	71.101	134.986	198.697	43.88	38.129	40.75	46.267	10552.5	3522.21	2614.59	7290.3
343	13071	15964.1	7652.21	17778	9409.25	6061.7	7565.72	7121.73	5.11	70.99	134.827	198.813	44.131	37.858	41.005	46.207	3661.78	9902.44	86.495	10656.3
344	16219.8	13636.5	9818.43	16351	8906.54	6929.56	7800.59	6565.98	5.036	70.874	135.159	198.877	43.998	37.881	41.172	45.982	7313.3	6706.9	2017.84	9785.02
345	16416	8551.79	10826.6	18548	9237.4	6903.34	6954.18	6316.38	4.935	71.051	135.028	199.048	43.98	38.092	40.957	46.104	7178.61	1648.46	3872.38	12231.6
346	11267.2	14858.6	10134.6	20037	8175.93	6337.5	7858.13	8032.38	5.228	70.771	134.797	198.923	44.211	37.916	41.153	46.075	3091.26	8521.07	2276.47	12004.6
347	16228.9	14839.6	9807.59	17983	7802.93	7111.8	7302.37	7673.9	5.055	70.817	135.179	198.993	43.967	37.829	40.72	45.822	8425.93	7727.84	2505.22	10309.1
348	12712.5	16716.1	9335.14	28429	7702.9	6625.27	7046.07	7122.7	4.905	71.099	135.236	198.78	43.69	37.91	41.004	45.972	5009.61	10090.9	2289.07	21306.3
349	11034.9	18829.7	8710.93	24808	8877.23	6519.1	7241.31	6758.05	5.152	70.908	135.011	199.008	43.935	38.031	40.817	46.217	2157.72	12310.6	1469.62	18050
350	15544.5	17294.8	7344.17	24049	7688.25	6728.86	6605.4	7114.57	5.098	70.763	134.842	198.795	44.11	38.069	40.945	46.155	7856.28	10566	738.776	16934.4
351	16402.5	10189.2	11017.2	16279	8144.79	7000.12	8395.98	8203.65	5.149	71.034	135.094	198.874	43.922	37.721	40.999	46.072	8257.69	3189.12	2621.18	8075.35
352	14394.6	14756	9289.07	23888	9758.43	7520.97	7905.69	7059	5.297	71.013	134.715	198.823	44.362	37.91	40.884	45.921	4636.16	7235.01	1383.38	16829
353	13508.5	15676.3	8685.64	24972	7678.72	7070.69	7353.16	7324.85	4.898	71.017	135.221	198.663	44.016	37.99	40.856	46.184	5829.73	8605.6	1332.47	17647.2
354	13072.2	15198.2	6671.18	22151	7174.18	8208.19	8412.42	7881.25	5.145	71.009	135.033	198.901	44.186	38.276	40.858	46.241	5897.97	6990.02	-1741.24	14269.8
355	14918.8	17105.6	9907.86	22849	9057.86	7245.17	7155.28	7244.9	4.708	70.926	135.125	198.738	44.057	37.962	40.914	46.062	5860.96	9860.41	2752.57	15604.1
356	15162.3	17983.1	7997.29	22567	9314.71	7946.31	8488.75	6517.55	5.028	71.031	134.957	198.824	44.129	37.924	40.88	46.012	5847.63	10036.8	-491.462	16049.5
357	12605.4	15161.4	9241.19	21014	9324.6	7547.51	7252.17	7881.57	5.187	71.139	135.06	198.871	43.761	37.89	40.768	45.903	3280.81	7613.85	1989.02	13132.4
358	12931.2	14241	7229.45	22240	9014.63	7329.33	8196.34	7414.88	5.042	70.91	135.143	198.8	44.261	37.67	41.057	46.12	3916.6	6911.7	-966.892	14825.1
359	15508.5	15746	8131.89	26104	10169.9	7435.83	7689.02	7327.12	5.091	71.066	134.869	198.711	44.265	38.051	40.95	46.233	5338.56	8310.18	442.864	18776.9
360	17239	15697.2	7823.85	23027	9214.32	6921.14	8300.86	5993	5.294	70.884	135.173	198.852	44.02	38.093	41.017	46.349	8024.69	8776.07	-477.009	17034
361	15915.4	16100.6	8635.95	22732	8960.4	7526.47	8367.5	8169.85	5.241	70.96	134.791	198.849	44.001	37.78	41.037	45.943	6955.05	8574.13	268.451	14562.1
362	17576.1	18616.5	7649.5	21171	8765.84	8292.68	7322.92	6914.38	5.111	70.843	134.94	198.938	43.867	37.993	40.856	45.999	8810.26	10323.9	326.581	14256.6
363	12122.9	11133.5	8898.83	18063	8044.76	6748.28	6904.56	7863.05	5.128	70.88	134.871	198.797	43.972	37.948	40.87	46.173	4078.13	4385.18	1994.26	10200
364	14030.4	14450.2	9251.13	20778	7167.59	8051.19	8976.99	6725.88	5.365	71.038	135.237	198.911	44.151	38.105	40.987	46.215	6862.85	6399	274.142	14052.1
365	12513	17619.5	10702.8	21005	8340.44	7762.77	8112.67	7428.85	5.159	71.079	135.092	198.934	44.203	37.901	41.051	46.031	4172.52	9856.75	2590.13	13576.1
366	12743	17374.5	6327.91	23388	9031.48	8062.52	8939.7	7680.4	5.091	71.041	135.002	198.822	43.844	37.885	41.085	46.011	3711.47	9311.98	-2611.79	15707.6
367	12517.5	17429.3	6642.28	21964	7383.77	8508.59	8196.93	7780.5	5.102	71.035	134.894	198.813	43.787	37.738	40.714	45.767	5133.71	8920.69	-1554.65	14183.5
368	13139.8	18342.6	11276.4	25960	7196.9	6721.41	7174.07	6959.88	5.007	70.955	135.079	198.725	44.173	38.011	41.03	45.851	5942.9	11621.2	4102.35	19000.1
369	13359.6	15286.9	7241.19	21661	8195.72	6440.76	8053.36	7172.75	5.108	70.879	134.987	198.864	44.077	37.781	41.054	45.975	5163.92	8846.09	-812.172	14488.2
370	13071	17175.3	7289.07	22608	8403.47	7667.93	8110.91	6204.25	5.104	71.165	135.039	198.796	43.899	38.211	40.975	45.901	4667.56	9507.37	-821.837	16403.8
371	13100.3	16128.5	6335.14	22869	8529.14	6376.35	7738.64	6696.62	5.238	71.115	134.997	198.933	43.956	37.633	40.74	46.049	4571.19	9752.14	-1403.5	16172.4
372	13827.5	14562.7	7801.27	17959	7890.14	7384.69	7482.05	7266.68	5.005	71.134	134.957	199.071	43.995	38.253	40.786	46.047	5937.37	7178.06	319.219	10692.3
373	11998.9	13351.6	9549.23	23936	8399.07	5564.82	6398.13	7377.5	5.082	71.064	135.125	198.639	43.938	37.805	40.881	46.26	3599.8	7786.78	3151.11	16558.5
374	15839.9	13303.8	5516.71	19999	8496.9	6763.5	7256.86	7480.2	4.899	70.93	135.098	198.713	44.197	37.993	41.081	46.155	7343.01	6540.29	-1740.15	12518.8
375	15710.3	16894.4	7599.82	21643	7769.95	7190.79	7594.49	7199.73	5.09	71.151	135.011	198.922	44.032	37.998	41.063	45.992	7940.3	9703.64	5.33	14443.3
376	17160.1	15320.7	12776	19548	8639.8	7680.88	8555.99	6868.55	5.249	70.977	134.946	198.826	43.932	38.132	41.076	46.235	8520.29	7639.84	4219.99	12679.5
377	16460	17734.1	7152.66	20544	8479.31	7638.47	9153.73	7358.65	5	71.122	135.028	198.694	43.969	37.914	40.896	46.105	7980.66	10095.6	-2001.06	13185.4
378	14851.2	14841.6	8437.22	21227	8096.42	6777.41	7684.03	7229.95	5.223	71.247	135.022	198.829	44.046	37.909	40.902	46.087	6754.76	8064.22	753.184	13997
379	14116.1	19228.1	6568.2	21174	8777.93	7486.98	8323.46	7922.85	4.791	70.775	135.164	198.846	44.148	37.981	41.134	46.061	5338.19	11741.1	-1755.26	13251.1
380	15608.8	14955.2	10892.5	20486	8854.51	7501.22	7879.56	6536.73	5.023	70.944	134.863	198.828	44.027	38.053	40.711	45.867	6754.28	7453.96	3012.94	13949.3
381	15788	14450.2	11783.2	20470	8610.12	7421.91	7129.15	7565.35	5.053	71.027	134.748	198.872	43.92	37.734	41.145	45.918	7177.93	7028.29	4654.04	12904.6
382	15860.2	15830.7	5865.4	22150	7359.58	6408.39	7311.18	8629.73	5.033	70.803	134.832	198.72	43.859	37.858	41.091	46.009	8500.62	9422.29	-1445.78	13520.3
383	16285.2	16922.3	10479.7	18336	9169.62	6684.51	8120.01	6749.93	5.175	71.091	134.859	198.904	43.925	37.91	41.149	45.99	7115.61	10237.8	2359.67	11586.1
384	12965.1	17192.2	8985.55	21893	7635.48	6651.49	6975.9	6646.9	5.093	71.062	135.017	198.851	43.743	38.142	40.968	45.991	5329.57	10540.7	2009.64	15246.1
385	12209.7	12783.9	9353.21	25223	8659.58	8158.66	7742.16	8047.98	5.164	71.189	135.079	198.804	44.059	37.817	41.04	46.062	3550.11	4625.2	1611.04	17175
386	11970.7	15521.9	8507.68	22147	9086.08	7839.82	7181.71	6461.98	5.167	70.827	134.874	198.873	44.001	37.555	40.973	46.163	2884.61	7682.1	1325.97	15685
387	14851.2	17464.1	9411.02	22770	9514.77	6895.89	7833.18	7788.62	4.786	70.896	134.918	198.8	44.045	38.077	40.877	46.197	5336.41	10568.3	1577.85	14981.4
388	11774.5	17007	10906.1	22082	7574.66	7073.61	7701.06	7819.18	4.93	70.9	134.946	198.997	43.972	37.928	40.878	46.118	4199.86	9933.37	3204.99	14262.8
389	12690	15130.5	7560.07	21109	9987.43	7107.92	6889.88	6821.75	4.862	70.851	135.073	198.89	44.206	37.893	41.063	46.097	2702.54	8022.56	670.19	14287.2
390	15977.5	9033.86	7783.2	19201	8696.96	6080.8	8324.34	7046.65	5.22	70.817	135.092	199.071	44.006	38.134	40.837	45.861	7280.5	2953.06	-541.146	12154.4
391	11651.6	18449.2	8558.27	21105	7455.95	5692.36	7622.09	7453.55	5.164	71.065	134.976	198.768	44.114	38.247	40.861	45.933	4195.69	12756.8	936.179	13651.5
392	13285.2	15572.7	7932.25	21312	8161.64	7757.92	7110.66	6928.02	5.009	70.841	135.269	199.059	44.209	37.924	41.035	46.082	5123.59	7814.79	821.59	14384
393	9478.02	16738	8004.52	22448	7772.89	7317.36	7000.56	7139.27	4.794	70.881	134.932	198.832	43.834	37.952	40.777	45.944	1705.13	9420.69	1003.95	15308.7
394	10837.7	14861.6	7972.9	22347	8431.68	7112.13	8642	7283.9	5.254	70.91	135.004	198.802	44.024	37.867	40.954	45.937	2405.97	7749.43	-669.105	15063.1
395	14040.6	14500	6820.23	16598	7701.44	6540.79	8078.32	7104.18	5.028	70.92	135.3	198.648	43.839	37.83	41.029	46.172	6339.15	7959.21	-1258.08	9493.83
396	14314.5	18957.2	8903.34	18519	8600.96	6821.76	7311.18	6627.4	5.188	70.828	135.079	199.021	44.049	38.058	41.176	46.116	5713.59	12135.4	1592.16	11891.6
397	12688.8	16969.1	7303.52	20998	7634.75	7861.18	8016.67	7345	4.939	71.144	134.891	198.784	44.043	38.343	40.706	46.098	5054.09	9107.94	-713.143	13653
398	10652.8	17429.3	8646.79	22215	8312.6	8159.96	7850.5	7524.07	4.921	70.974	134.767	198.798	44.052	37.764	41.328	45.781	2340.16	9269.32	796.296	14690.9
399	13014.7	11782.9	9233.97	20147	7993.83	6196.69	7656.14	7578.02	5.041	71.002	134.998	198.711	44.055	37.819	40.99	46.126	5020.83	5586.18	1577.82	12569
400	13646	16755	8175.25	22891	8161.64	7664.69	7218.41	6184.43	4.953	70.947	135.102	198.772	44.183	37.815	40.969	46.019	5484.36	9090.29	956.843	16706.6
401	14995.5	13929.3	9318.88	18949	8531.34	7273.98	6563.71	8179.93	5.005	70.845	134.896	198.764	44.199	37.987	41.027	46.144	6464.15	6655.3	2755.17	10769.1
402	13171.4	14803.8	7959.35	23463	6970.1	8437.05	8054.83	8105.82	5.139	70.794	135.127	198.837	43.91	37.89	40.784	46.151	6201.27	6366.73	-95.482	15357.2
403	10421.6	15644.4	7071.36	21428	7985.03	7181.4	6977.96	8562.45	5.244	70.974	135.101	198.876	44.075	38.023	41.133	45.794	2436.61	8463.02	93.406	12865.5
404	14703.5	15696.2	8137.31	20098	8328.35	7544.6	8327.28	7229.62	5.091	70.863	135.045	199.028	43.889	37.894	41.124	46.173	6375.14	8151.62	-189.972	12868.4
405	13897.4	15051.8	8390.24	21594	7484.89	7115.36	6175.59	6752.2	5.324	71.074	135.031	198.811	43.961	37.873	40.762	46.022	6412.51	7936.43	2214.66	14841.8
406	12077.8	15471.1	6269.2	19769	7408.31	6719.47	7383.99	7083.7	5.242	71.009	135.4	198.677	44.073	37.943	40.946	45.884	4669.48	8751.64	-1114.79	12685.3
407	11339.3	17073.7	8197.83	21931	8879.06	7193.7	8196.64	7707.05	5.109	71.014	135.077	198.758	44.015	37.657	40.967	46.058	2460.29	9880	1.197	14224
408	11391.2	15067.7	7005.42	25711	9313.25	6662.82	7058.69	6707.35	5.274	70.884	135.299	198.712	44.271	37.96	40.797	45.964	2077.96	8404.91	-53.274	19003.7
409	11078.9	14189.2	7536.59	20830	8522.91	6756.38	7797.06	7310.88	5.257	70.873	134.884	198.747	44.304	38.001	40.887	46.117	2556	7432.87	-260.478	13519.1
410	14713.6	13510	9018.97	23412	8673.51	7735.58	7938.57	7440.88	5.237	71.096	135.015	198.699	44.176	38.11	41.26	46.148	6040.14	5774.38	1080.4	15971.1
411	16261.6	15512.9	8364.95	23489	8093.86	7012.1	6417.8	7068.43	4.912	70.972	134.94	198.809	44.141	38.012	41.045	45.928	8167.7	8500.85	1947.15	16420.6
412	14317.9	11262	8768.74	16573	8192.05	6621.71	7849.62	7196.8	5.119	70.976	135.145	198.968	44.179	37.977	41.005	45.847	6125.87	4640.24	919.128	9376.2
413	18622.3	10218.1	11468.8	15731	9250.59	7378.86	8560.98	7700.55	5.17	71.035	135.126	198.733	44.114	37.763	40.912	46.141	9371.73	2839.27	2907.86	8030.45
414	15696.7	14589.6	9422.76	18515	6998.68	7674.08	7513.17	8330.08	5.036	71.114	134.796	198.963	44.223	37.77	41.045	46.092	8698.06	6915.56	1909.6	10184.9
415	16821.9	11771.9	9617.89	12912	9213.22	9451.87	7344.65	7271.55	5.178	71.255	134.983	198.823	44.031	37.661	41.05	46.165	7608.65	2320.05	2273.24	5640.45
416	12756.5	11576.7	7975.61	14588	8485.91	7239.02	7591.85	6448.32	5.048	71.068	135.092	198.985	44.012	38.046	41.007	46.089	4270.57	4337.67	383.762	8139.68
417	17011.3	10210.2	10398.4	13207	8736.89	6874.85	8591.51	7289.43	4.984	71.194	134.836	199.002	44.213	37.937	41.022	46.038	8274.38	3335.31	1806.87	5917.57
418	12770	12095.6	11428.2	16629	7958.29	7749.83	8750.93	7080.45	4.958	71.048	134.987	198.978	44.234	37.807	40.893	45.812	4811.73	4345.79	2677.26	9548.55
419	14910.9	9092.63	10170.7	15646	8220.63	7541.04	8286.18	7556.9	5.041	70.562	135.128	199.043	44.152	38.02	40.873	46.134	6690.3	1551.59	1884.55	8089.1
420	23228.9	9307.77	10502.3	16162	8894.08	6645.67	7656.44	7527.65	5.204	70.923	135.053	198.885	43.974	38.162	40.803	45.811	14334.8	2662.1	2845.82	8634.35
421	16934.6	9431.27	11758.8	12762	9496.45	7056.45	6294.49	6411.27	5.101	71.143	134.991	199.055	44.175	38.038	40.766	46.028	7438.16	2374.83	5464.32	6350.73
422	20398	9277.89	13333.3	18493	7599.58	7719.07	8453.23	6842.88	5.342	70.951	135.254	198.819	43.972	37.984	41.013	45.958	12798.4	1558.82	4880.1	11650.1
423	22440.8	9748.01	10040.6	15614	10048.6	7340.66	8285.3	7163.65	4.836	71.319	134.748	198.722	43.97	37.896	41.02	45.968	12392.2	2407.35	1755.35	8450.35
424	16078.9	13975.1	7534.78	24842	9091.57	7159.39	7144.72	6550.05	5.248	71.013	134.94	198.574	44.261	37.805	40.965	46.21	6987.35	6815.71	390.063	18292
425	17428.4	10351.6	9308.04	19025	7897.83	6473.46	8254.76	7586.15	4.987	70.982	135.257	198.786	44.22	37.825	41.024	46.05	9530.58	3878.14	1053.28	11438.9
426	20729.4	11463.1	9923.22	11570	8395.77	6694.55	8215.13	6450.93	5.016	71.019	134.842	198.734	44.158	37.984	40.907	46.286	12333.7	4768.6	1708.09	5119.07
427	15550.2	10308.8	8606.14	25013	8301.61	7971.89	8184.01	7365.48	4.894	71.246	135.041	198.661	44.075	38.153	40.915	45.803	7248.56	2336.88	422.132	17647.5
428	13418.3	17560.8	7454.38	18519	7732.22	6998.51	7922.43	7110.35	4.835	71.015	134.982	198.897	44.341	37.938	40.709	46.01	5686.05	10562.3	-468.043	11408.6
429	17838.8	13911.4	9424.57	20799	8421.05	6716.88	7718.09	6654.38	4.915	70.903	134.952	198.885	43.979	38.09	41.112	46.06	9417.73	7194.47	1706.48	14144.6
430	14020.3	14913.3	8147.24	18326	8203.41	6800.72	7795.89	6770.4	5.101	70.88	134.962	198.853	43.968	37.976	40.62	46.209	5816.88	8112.62	351.355	11555.6
431	12368.7	16397.4	8389.34	21949	7794.14	6550.82	7431.84	6118.45	4.914	70.899	135.012	198.701	43.843	38.015	41.088	45.742	4574.52	9846.59	957.498	15830.5
432	17323.6	10881.5	9981.03	11777	7885.37	6400.62	8412.13	7582.9	4.887	71.048	134.746	198.847	43.924	38.072	41.097	46.05	9438.19	4480.85	1568.9	4194.1
433	12668.5	13034.9	6474.26	20509	7918.72	8432.52	7409.82	6981.65	5.252	70.927	135.274	198.85	43.722	37.488	40.813	46.202	4749.83	4602.34	-935.568	13527.4
434	18337.1	10282.9	10880.8	16398	6992.08	6135.51	7950.02	7721.02	5.009	71.103	135.174	198.98	44.249	37.947	41.018	46.057	11345	4147.36	2930.74	8676.98
435	15541.1	7537.85	7788.62	13671	8585.2	6445.62	7765.06	7045.35	4.967	71.055	134.779	198.852	44.095	37.98	41.061	46.012	6955.95	1092.23	23.555	6625.65
436	17226.6	7390.44	10257.5	11583	8364.26	6714.94	7635.01	7020.32	5.267	71.035	134.926	198.795	43.896	37.904	40.918	46.088	8862.34	675.498	2622.45	4562.68
437	16744.1	12483.1	7990.97	17033	9279.17	7632.32	7819.08	7319.98	4.851	70.922	135.057	198.982	44.264	37.993	40.803	45.982	7464.91	4850.75	171.883	9713.02
438	15620.1	10345.6	7878.95	16409	8211.84	6976.49	8612.94	7058.68	4.98	70.817	135.092	198.852	44.135	37.902	40.864	46.015	7408.23	3369.12	-733.987	9350.33
439	13054.1	15810.8	8755.19	22147	9061.53	7188.85	8497.85	6511.05	5.222	71.138	134.988	198.93	44.099	37.946	40.564	46.064	3992.59	8621.91	257.34	15636
440	16154.5	12371.5	9042.46	15408	7964.52	6789.07	7538.71	6724.57	5.084	70.962	134.956	198.767	43.891	37.553	41	45.899	8189.94	5582.44	1503.75	8683.42
441	18189.4	12424.3	9154.47	21615	8326.52	8107.52	7634.12	5976.43	5.069	71.041	134.982	198.832	44.087	37.795	40.829	46.121	9862.88	4316.78	1520.35	15638.6
442	19704.6	8047.81	8319.78	15758	9065.92	7045.44	7418.34	6510.07	5.098	71.173	134.938	199.015	44.271	37.92	40.887	45.83	10638.7	1002.37	901.445	9247.92
443	13170.2	13288.8	7551.94	17415	8418.12	7940.81	7557.2	5933.85	4.94	70.939	135.138	199.089	44.181	38.062	41.116	46.102	4752.11	5348.03	-5.261	11481.1
444	18526.5	11930.3	10464.3	9288	9166.32	6566.68	8702.19	6299.8	5.137	71.145	135.128	198.994	43.996	38.11	40.932	45.933	9360.17	5363.6	1762.13	2988.2
445	16044	8099.6	8517.61	19541	7877.68	7077.81	7199.32	6456.45	5.052	71.112	135.361	198.806	44.014	38.108	40.785	45.925	8166.29	1021.79	1318.29	13084.5
446	17413.8	10116.5	9640.47	17946	8676.44	7679.26	8873.06	7192.57	5.103	71.179	135.06	198.992	43.995	37.795	40.828	46.268	8737.32	2437.28	767.412	10753.4
447	15963.9	15845.6	10839.2	19847	9066.66	7584.09	7081.89	6143.48	5.336	70.853	135.059	198.757	44.087	37.991	40.924	45.927	6897.27	8261.53	3757.32	13703.5
448	11437.4	14121.5	7557.36	21718	6830.5	7276.89	7338.19	7353.77	5.305	70.834	135.069	198.812	44.111	38.085	41.121	46.23	4606.93	6844.62	219.173	14364.2
449	11221	16725.1	8878.95	21267	8075.54	7039.94	7746.57	6871.8	5.024	71.052	135.032	198.78	44.408	37.851	40.812	46.08	3145.43	9685.16	1132.38	14395.2
450	16675.3	13041.8	9480.58	18220	8443.41	8397.56	6403.12	6938.43	5.265	70.932	135.078	199.099	43.949	38.055	40.755	46.096	8231.91	4644.27	3077.46	11281.6
451	16355.1	9590.64	14374.9	14648	9782.24	6517.16	7867.52	6843.52	5.203	70.823	134.902	199.222	43.943	38.012	40.925	46.209	6572.89	3073.48	6507.36	7804.48
452	17555.8	11217.1	10114.7	17206	8504.59	6256.9	7438.6	7849.73	4.924	71.339	135.168	199.009	44.19	38.058	40.94	46.025	9051.21	4960.23	2676.13	9356.27
453	15179.3	8377.49	10861.8	14730	9247.29	7890.96	7898.65	6421.02	5.075	70.913	135.008	198.938	44.242	37.841	41.138	46.057	5931.96	486.529	2963.14	8308.98
454	13387.8	10226.1	9397.47	17489	8438.27	7245.82	8782.05	7208.18	5.199	71.048	135.2	198.736	44.227	37.975	40.772	45.87	4949.55	2980.28	615.425	10280.8
455	21761	7424.3	11091.2	14871	7857.52	7805.5	7102.73	7334.27	4.991	71.08	134.786	198.762	44.018	38.176	40.884	46.076	13903.5	-381.199	3988.51	7536.73
456	17345	9708.17	10369.5	22068	8651.89	6146.51	8432.97	7002.77	5.027	70.99	134.854	198.963	43.878	38.064	41.067	46.038	8693.09	3561.65	1936.49	15065.2
457	17756.5	7358.57	11391.1	18673	8751.55	7283.69	8900.07	6996.93	5.242	70.92	135.134	198.841	44.158	38.013	40.949	45.921	9004.93	74.875	2491.08	11676.1
458	18563.7	7749	12663.1	14782	10137.7	8420.54	8063.05	6789.57	5.035	71.004	135.141	198.84	44.195	37.789	40.737	46.046	8426.04	-671.538	4600	7992.43
459	14396.8	16347.6	9688.35	21895	10264.1	7452.99	7246.88	7551.7	4.838	70.876	134.94	198.877	44.254	37.943	40.997	46.19	4132.78	8894.62	2441.46	14343.3
460	16983.1	10368.5	10434.5	13737	7547.55	7957.64	8783.81	6372.27	5.102	71.025	134.84	198.88	44.138	38.133	40.891	46.124	9435.54	2410.88	1650.7	7364.73
461	16373.2	11574.7	9963.87	20492	8872.1	7420.29	8649.93	6721.98	5.26	70.633	134.83	198.617	44.145	37.978	41.17	46.425	7501.07	4154.41	1313.93	13770
462	15637	10183.3	11903.3	19292	9659.13	6707.82	8536.9	6615.05	5.249	70.904	134.876	198.935	43.818	37.913	40.875	46.165	5977.85	3475.45	3366.44	12677
463	12576.1	8858.57	10839.2	13921	9540.78	6065.59	8152.6	6292	5.283	71.293	135.286	198.545	44.094	37.844	40.858	46.011	3035.32	2792.98	2686.61	7629
464	20522	12607.6	12554.7	15965	9456.51	7113.1	7817.61	8205.92	5.244	70.935	134.948	198.963	44.009	38.041	41.014	45.936	11065.5	5494.47	4737.04	7759.07
465	21047.4	10238	9129.18	19571	8622.58	6315.16	6839.97	7348.25	5.219	70.884	135.16	198.734	43.827	37.737	40.923	45.953	12424.8	3922.88	2289.2	12222.8
466	13428.4	13388.4	12494.1	19274	8478.21	7973.18	6781.26	6440.2	5.019	71.009	134.913	199.155	44.103	37.776	41.062	46.055	4950.2	5415.26	5712.87	12833.8
467	15367.5	10220.1	11764.2	13922	7812.82	7813.27	7693.14	7629.38	4.993	71.138	135.406	198.845	44.262	37.874	40.893	45.979	7554.71	2406.85	4071.09	6292.62
468	21650.5	12281.9	11037.9	14047	8164.94	7349.73	8846.93	6720.68	5.256	71.04	135.209	198.975	44.199	37.95	40.806	46.064	13485.6	4932.15	2191.01	7326.32
469	19303.3	8686.25	9411.92	13846	9547.38	7715.19	7533.72	8363.55	4.924	70.92	135.086	198.787	44.106	37.766	40.907	46.059	9755.89	971.066	1878.21	5482.45
470	16907.6	12035.9	12147.2	14772	8856.34	7329.01	7293.56	6942	5.24	71.001	135.249	199.052	44.271	37.806	40.848	46.076	8051.21	4706.85	4853.68	7830
471	17855.7	10149.4	11243	17008	8850.11	7167.48	7317.34	5832.12	5.007	71.177	135.112	198.792	43.829	37.752	40.895	46.059	9005.58	2981.92	3925.66	11175.9
472	16743	7741.04	12131	11135	9027.45	5651.24	8061.29	6070.68	5.053	70.73	134.972	198.861	44.064	38	40.979	46.221	7715.5	2089.79	4069.69	5064.32
473	18755.4	7685.26	9498.65	15909	9014.63	6395.77	7839.05	6963.45	5.174	71.018	134.979	199.034	44.012	38.089	40.849	45.982	9740.73	1289.49	1659.6	8945.55
474	20811.7	8181.27	10872.6	17116	9368.57	7847.91	8348.71	7365.48	5.142	71.267	134.997	198.842	44.039	38.074	40.773	45.896	11443.2	333.367	2523.92	9750.52
475	18904.2	9003.98	8363.14	18334	10120.4	7812.62	8399.8	6707.68	5.075	70.886	135.053	199.043	43.912	38.328	41.088	46.077	8783.74	1191.36	-36.652	11626.3
476	19432.9	9418.33	10713.6	15725	7734.78	6538.52	6496.18	6690.12	5.146	70.859	135.063	198.992	44.364	38.045	40.825	46.008	11698.1	2879.81	4217.46	9034.88
477	17272.8	8432.27	12995.5	15284	10176.5	7473.06	8669.9	6207.18	4.944	71.071	135.04	199.123	44.142	38.026	41.18	46.106	7096.34	959.213	4325.59	9076.83
478	15907.6	8008.96	10268.3	19550	8341.91	6750.22	6798.58	7017.07	5.159	71.126	134.888	198.73	43.893	37.921	40.877	46.188	7565.64	1258.74	3469.72	12532.9
479	17182.6	8062.75	8733.51	13768	8564.68	6083.39	8120.89	7340.12	5.014	71.259	135.063	198.9	44.023	37.914	41.051	45.734	8617.95	1979.36	612.624	6427.88
480	16838.8	9431.27	8915.99	13950	7620.1	7005.95	6957.7	6395.68	5.119	70.86	135.042	199.195	44.18	37.876	40.74	46.098	9218.69	2425.32	1958.29	7554.32
481	15579.5	11265.9	10593.5	16101	9577.06	6417.13	7686.38	7920.25	5.165	71.157	135.018	198.743	44.024	38.117	41.011	46.238	6002.42	4848.81	2907.11	8180.75
482	18219.8	8580.68	11924.1	15515	9831.34	7216.68	7155.87	6812.65	4.993	71.11	135.069	198.997	44.106	37.896	41.141	45.995	8388.5	1363.99	4768.25	8702.35
483	16126.3	6099.6	9768.74	14101	9785.17	5883.34	8552.46	5623.15	5.214	71.418	135.051	198.531	44.063	37.866	40.89	46.08	6341.09	216.26	1216.28	8477.85
484	16662.9	10368.5	10719.1	10929	7695.57	6997.53	7675.23	6807.77	5.081	71.045	135.042	198.719	43.986	38.131	40.938	45.816	8967.33	3370.99	3043.84	4121.23
485	16137.5	9924.3	9993.68	14677	8830.69	7816.19	7867.82	7215.32	5.386	71.14	135.199	198.991	44.247	37.953	40.77	45.999	7306.85	2108.12	2125.86	7461.68
486	16316.8	7198.21	11177.1	12167	9083.88	7543.95	7879.56	6639.1	5.077	70.956	134.921	198.866	44.289	37.831	40.973	45.857	7232.92	-345.741	3297.49	5527.9
487	18798.2	11744	13023.5	14542	9959.95	6871.61	7530.19	7057.7	5.11	71.218	135.056	198.854	43.945	38.171	40.627	46.005	8838.25	4872.41	5493.29	7484.3
488	16814	9866.53	11311.7	12990	9131.14	6975.85	7492.32	7315.1	5.019	71.252	135.077	198.932	43.987	37.926	41.044	46.174	7682.84	2890.69	3819.33	5674.9
489	16732.8	13493	8902.44	15065	9520.63	6970.67	7169.08	8059.68	4.903	71.194	135.024	198.847	44.224	38.035	40.817	46.163	7212.18	6522.36	1733.36	7005.32
490	19998.9	12727.1	8219.51	12738	7764.09	7307.32	6765.7	6666.07	5.03	70.98	134.98	198.872	44.093	38.062	40.833	46.107	12234.8	5419.77	1453.82	6071.93
491	20242.4	10630.5	9136.41	13697	8744.59	7290.16	6862.87	7028.45	5.228	71.204	135.154	198.892	44.229	38.276	40.881	45.638	11497.8	3340.31	2273.53	6668.55
492	15721.5	9278.88	9839.2	15170	8438.64	7277.54	7064.57	7112.95	5.128	70.974	134.647	198.886	44.162	37.823	40.771	46.017	7282.89	2001.35	2774.64	8057.05
493	16558.1	12530.9	9446.25	20649	8469.05	6700.05	7597.43	5883.48	4.985	70.875	135.213	198.809	44.127	37.908	40.911	45.977	8089.01	5830.83	1848.83	14765.5
494	14005.6	9554.78	12853.7	17166	8919.36	6346.56	7783.56	6511.38	5.023	71.139	134.969	198.712	44.052	37.985	41.023	46.157	5086.27	3208.22	5070.1	10654.6
495	19947	9702.19	13556.5	15024	8980.92	6766.73	7309.71	5826.93	5.126	71.108	134.908	198.804	43.908	38.127	40.978	45.953	10966.1	2935.46	6246.75	9197.08
496	21262.7	11853.6	11885.3	14025	8920.1	7263.62	8316.12	7220.85	5.204	70.928	134.838	199.041	44.042	37.958	41.044	46.09	12342.6	4589.97	3569.15	6804.15
497	18280.7	9179.28	6988.26	16212	7393.29	6660.88	8282.36	9141.6	5.262	71.346	134.805	198.923	44.196	37.887	40.678	45.888	10887.4	2518.4	-1294.11	7070.4
498	19771.1	11911.4	13543.8	14133	7974.77	7198.56	8842.52	7279.35	4.842	71.071	134.973	198.822	44.118	38.247	40.981	46.123	11796.4	4712.8	4701.29	6853.65
499	15421.6	9188.25	11087.6	16234	8698.06	6113.17	5930.15	6593.6	5.078	71.245	134.972	198.898	44.131	38.205	41.155	46.233	6723.59	3075.07	5157.48	9640.4
500	15671.9	12499	9215	15176	8883.09	8474.6	9217.73	6436.95	5.158	70.945	135.025	198.894	43.957	37.878	40.826	46.21	6788.84	4024.4	-2.732	8739.05
501	13728.3	7729.08	12374	15431	7281.9	6395.77	8001.69	6975.48	5.243	71.077	135.285	198.885	43.87	37.914	41.143	45.901	6446.39	1333.32	4372.29	8455.52
502	17230	15322.7	11949.4	21366	10394.9	6258.19	7239.54	6305.65	5.234	71.039	134.995	198.67	44.404	37.972	40.576	46.011	6835.12	9064.52	4709.87	15060.4
503	16690	11132.5	10853.7	17561	9537.12	7278.51	7753.91	6649.5	5.296	70.624	134.926	198.793	44.527	37.748	40.993	46.181	7152.85	3853.96	3099.75	10911.5
504	16252.5	10165.3	8688.35	18990	8534.27	7197.59	8614.41	6810.38	5.11	71.255	135.089	198.976	44.022	37.795	40.941	46.226	7718.26	2967.75	73.939	12179.6
505	18382.2	10077.7	9020.78	13529	8035.23	5856.15	7678.16	8197.15	5.032	71.163	134.772	198.902	44.235	37.657	40.857	46.218	10347	4221.54	1342.62	5331.85
506	18264.9	11352.6	9843.72	20960	8186.19	6734.04	7468.84	7295.93	5.149	70.984	134.818	198.848	43.928	38.121	40.679	46.019	10078.7	4618.55	2374.89	13664.1
507	15944.8	10320.7	7999.1	19645	8394.31	6835.68	7040.79	7913.1	5.195	71.307	134.99	199.078	43.922	37.822	40.925	46.086	7550.45	3485.03	958.311	11731.9
508	18775.6	8789.84	10159.9	17640	10156.7	6597.11	8288.82	6097.32	5.104	71.034	135.011	198.806	44.261	38.035	40.867	46.086	8618.94	2192.73	1871.07	11542.7
509	15000	8268.92	10109.3	13109	7169.79	6542.73	7648.22	7385.3	4.852	71.288	135.004	198.845	44.105	37.932	40.901	46.34	7830.21	1726.19	2461.09	5723.7
510	19047.4	8187.25	10038.8	11721	10241	7966.38	7944.15	7568.93	4.959	70.804	135.086	199.029	44.197	37.642	40.902	46.053	8806.37	220.867	2094.69	4152.07
511	17470.1	7803.78	8626.92	13110	9299.32	7464.32	8683.11	8256.3	5.126	71.254	134.966	198.865	44.031	38.037	40.773	45.874	8170.8	339.467	-56.187	4853.7
512	16321.3	6352.59	13710.9	16117	7965.25	7663.4	7516.1	5592.6	5.195	71.012	134.985	198.954	44.219	37.829	40.996	46.202	8356.06	-1310.81	6194.83	10524.4
513	16923.3	9553.78	10238.5	11550	9228.24	6203.49	6098.96	6638.77	5.218	71.041	134.889	198.854	44.285	37.735	41.105	45.835	7695.1	3350.3	4139.52	4911.23
514	19658.4	8108.57	11564.6	18507	7703.64	7329.98	7647.63	6432.73	5.054	71.044	135.055	198.818	44.123	38.08	40.899	45.959	11954.8	778.586	3916.96	12074.3
515	20374.3	9613.55	9572.72	12784	7912.85	6708.14	8627.91	6065.15	5.162	71.025	134.951	199.069	44.158	37.929	40.86	46.053	12461.4	2905.4	944.806	6718.85
516	21736.2	7866.53	10835.6	14603	10236.2	7100.8	7913.32	6400.23	5.091	70.857	135.034	198.725	43.887	37.868	40.94	45.742	11500	765.737	2922.27	8202.77
517	19784.7	8896.41	11085.8	15695	9389.46	8196.54	7213.71	7274.15	4.977	71.113	135.166	198.83	44.164	38.07	40.889	45.8	10395.2	699.875	3872.11	8420.85
518	14647.1	11880.5	12529.4	12894	7821.62	7028.61	8893.02	8784.1	5.144	70.764	134.993	198.867	44.232	37.967	40.978	46.126	6825.51	4851.87	3636.34	4109.9
519	15501.7	8544.82	11010.8	12733	7115.56	5643.8	7299.44	7596.88	5.145	70.469	134.917	198.72	44.116	37.968	41.008	46.217	8386.13	2901.02	3711.41	5136.12
520	19848.9	7492.03	10799.5	15609	8742.39	7031.2	7669.65	7803.25	4.991	70.776	134.962	198.9	44.251	38.117	40.756	45.735	11106.5	460.832	3129.81	7805.75
521	13523.1	7511.95	10447.2	12201	9762.46	6638.22	8216.6	7569.57	5.184	71.013	134.945	198.912	44.172	37.831	41.054	45.795	3760.65	873.73	2230.56	4631.43
522	14912.1	13621.5	7430.89	15490	7487.82	6953.84	6611.56	7261.15	5.121	70.868	134.811	198.948	44.236	38.033	40.885	46.106	7424.24	6667.68	819.332	8228.85
523	16276.2	10558.8	8986.45	14456	9016.83	7845.32	7770.64	7441.85	5.056	70.775	135.259	199.02	44.406	38.144	40.754	46.064	7259.39	2713.45	1215.81	7014.15
524	18065.4	8179.28	12371.3	13690	8942.45	5928.01	7619.74	6724.9	5.167	71.087	135.136	198.991	43.876	37.949	41.093	46.118	9122.94	2251.27	4751.54	6965.1
525	18709.1	10160.4	10958.4	10364	8345.58	6957.72	6731.93	5982.27	4.809	70.825	135.155	198.914	43.996	38.184	40.908	45.775	10363.6	3202.64	4226.51	4381.73
526	18118.4	10975.1	9305.33	15556	8214.4	6434.94	6963.28	5983.25	4.848	70.852	134.887	198.895	43.907	37.802	40.931	45.964	9903.97	4540.16	2342.05	9572.75
527	14369.8	8289.84	10460.7	14962	8433.51	6462.77	7138.26	5781.43	5.25	71.09	135.061	198.953	44.231	37.789	40.82	46.088	5936.27	1827.07	3322.45	9180.58
528	12072.2	9919.32	10367.7	14636	7200.56	7313.15	7994.94	6624.15	4.74	71.073	135.018	198.831	44.272	38.084	40.809	46.02	4871.59	2606.18	2372.72	8011.85
529	17581.7	12727.1	7608.85	21392	8078.1	6112.2	7231.32	6619.6	5.031	70.885	135.036	198.794	44.154	37.68	40.946	45.861	9503.64	6614.89	377.529	14772.4
530	21223.2	7919.32	12785.9	11269	9182.44	6144.25	8629.67	7514.98	5.271	70.934	134.953	199.064	44.023	37.713	40.902	46.184	12040.8	1775.08	4156.23	3754.03
531	24030.4	10581.7	9900.63	12485	8669.11	7103.71	7469.42	6931.93	5	71.153	135.05	199.025	44.191	38.036	40.856	46.111	15361.3	3477.96	2431.21	5553.07
532	17170.2	10751	9720.87	15030	8310.4	7380.8	8221.59	7368.4	4.955	71.021	134.984	198.93	44.13	37.937	41.008	45.969	8859.84	3370.19	1499.28	7661.6
533	18508.5	8811.75	13662.1	14978	7776.92	7056.77	7101.85	7212.4	5.076	70.726	135.07	198.908	44.034	37.894	40.791	46.004	10731.5	1754.98	6560.3	7765.6
534	15422.8	6486.06	11735.3	14062	9142.87	7028.61	7758.9	6564.35	5.411	70.983	134.788	198.847	44.106	37.864	40.911	45.99	6279.9	-542.554	3976.42	7497.65
535	18571.6	10076.7	9433.6	15013	8017.28	6834.06	7024.64	7213.38	5.345	71.03	135.009	198.98	44.074	37.844	41.077	45.926	10554.3	3242.63	2408.97	7799.62
536	16049.6	7720.12	9093.95	14522	8179.96	7233.52	7250.99	6622.85	5.263	70.796	135.055	198.823	43.844	37.958	41.077	46.085	7869.65	486.604	1842.95	7899.15
537	17104.8	10343.6	10677.5	17394	9148.36	5964.59	8054.54	5916.62	5.302	71.238	135.017	198.946	44.379	37.909	40.906	46.021	7956.48	4379.03	2622.97	11477.4
538	18771.1	9469.12	9969.29	15955	7998.96	6398.68	9460.23	7000.5	4.988	71.084	135.109	199.241	44.319	38.005	41.004	46.019	10772.2	3070.44	509.056	8954.5
539	15151.1	7181.27	12796.7	15601	9154.59	6941.53	7267.14	6398.6	5.08	70.864	134.998	198.738	44.122	38.048	40.956	45.767	5996.48	239.741	5529.61	9202.4
540	18740.7	7990.04	12351.4	17073	8449.63	7128.64	7275.95	6629.02	5.143	71.119	134.943	198.703	44.148	37.861	41.047	46.04	10291.1	861.404	5075.45	10444
541	17427.3	10584.7	9839.2	19871	8338.61	6666.71	7305.89	6965.4	5.044	70.78	135.158	198.814	44.131	38.261	40.786	46.116	9088.67	3917.95	2533.31	12905.6
542	20435.2	6318.73	10999.1	14785	8400.54	6681.6	6800.93	7218.57	5.078	71.029	135.036	199.084	43.934	37.931	41.053	46.174	12034.6	-362.873	4198.17	7566.43
543	18692.2	9932.27	9443.54	11086	8330.55	6950.92	6910.14	7111	5.334	71.248	135.075	198.895	44.13	38.029	40.93	45.991	10361.7	2981.35	2533.4	3975
544	17815.1	8861.55	13066.8	16979	8917.53	7762.13	7714.86	6603.02	5.324	71.124	135.007	198.732	43.944	37.943	40.895	45.962	8897.58	1099.43	5351.99	10376
545	21164.6	11661.4	9740.74	19856	8767.67	6838.6	7487.33	6972.55	5.088	71.066	135.008	198.875	44.39	37.95	40.844	46.151	12396.9	4822.76	2253.41	12883.5
546	20869.2	10401.4	11345.1	11100	9434.53	5761.63	7676.69	7346.3	4.982	71.026	135.268	199.088	44.242	38.164	41.006	45.958	11434.7	4639.77	3668.38	3753.7
547	19427.3	9619.52	11683.8	14043	7605.44	7808.74	7700.18	6736.93	5.324	71.339	134.946	198.861	44.099	38.285	40.833	45.877	11821.8	1810.78	3983.65	7306.07
548	21518.6	8708.17	10850	11633	7611.67	6541.11	8453.52	7097.35	4.894	71.037	135.082	198.874	44.192	37.988	41.058	45.915	13906.9	2167.06	2396.52	4535.65
549	18425	11506	10394.8	13407	9869.45	5526.62	7898.94	6808.43	5.101	70.869	135.088	198.903	44.203	37.849	40.752	46.244	8555.58	5979.36	2495.82	6598.57
550	16067.6	6573.7	10329.7	13607	8931.09	7027.64	7392.5	6050.2	5.204	70.941	134.886	198.859	44.034	38.065	40.944	46.117	7136.56	-453.933	2937.22	7556.8
551	13322.4	10506	10505.9	16911	7239.77	6173.7	6635.64	6567.6	5.043	71.229	135.071	198.896	44.068	38.057	41.049	46.173	6082.67	4332.27	3870.24	10343.4
552	20650.5	8846.61	8752.48	15497	9139.2	5566.43	7539.59	7678.77	5.121	70.97	135.165	198.798	44.029	38.065	41.339	46.133	11511.3	3280.18	1212.89	7818.23
553	20594.1	10457.2	10194.2	18155	9803.13	8272.29	7577.17	6043.05	5.264	70.961	135.154	198.963	43.973	37.924	40.805	46.111	10791	2184.89	2617.05	12112
554	20372	8128.49	8443.54	15862	9384.7	6375.7	6971.21	5593.9	5.147	71.093	134.95	198.889	44.302	37.955	40.778	45.823	10987.3	1752.79	1472.34	10268.1
555	16982	8899.4	12278.2	14382	7989.8	8002.64	8783.51	6966.7	4.998	70.993	134.798	198.706	44.143	37.86	41.063	45.919	8992.17	896.763	3494.72	7415.3
556	16864.7	9288.84	12387.5	14463	9065.92	6819.82	9613.19	8361.92	4.941	70.982	134.94	198.788	44.266	38.033	41.073	46.05	7798.79	2469.02	2774.34	6101.07
557	15240.1	11609.6	10336.9	15599	8860.37	6898.48	8443.25	5965.38	5.139	71.02	135.135	199.035	43.836	37.739	40.711	45.899	6379.76	4711.08	1893.7	9633.62
558	18780.2	9572.71	13727.2	17689	8758.88	6777.41	7745.98	7072.65	5.092	70.911	135.129	198.968	44.146	37.895	40.697	45.974	10021.3	2795.29	5981.21	10616.4
559	19115	11013.9	12009	15096	7535.09	7734.61	7581.28	5958.55	4.857	71.006	135.14	198.968	44.121	38.368	41.006	46.046	11579.9	3279.33	4427.76	9137.45
560	16436.3	9322.71	9739.84	12726	8231.99	5583.59	7740.11	6566.3	5.081	70.968	135.131	199.053	44.29	37.781	41.008	46.116	8204.31	3739.12	1999.73	6159.7
561	18684.3	12426.3	8808.49	14900	9308.12	6094.72	7403.66	7112.3	5.039	71.052	134.964	199.006	43.924	37.799	40.774	46.119	9376.21	6331.57	1404.83	7787.7
562	15323.6	7259.96	7929.54	15151	9145.8	6333.94	8728.91	6658.6	5.165	71.059	134.937	199.099	43.868	37.992	40.805	46.007	6177.76	926.021	-799.367	8492.4
563	18770	9935.26	10949.4	11748	8686.33	7718.1	6226.38	6780.48	5.079	70.7	135.095	198.958	44.122	38.04	41.037	45.958	10083.7	2217.16	4723.03	4967.52
564	19537.8	9731.08	10906.1	14718	8576.04	7364.29	7384.28	6303.05	5.072	70.88	135.122	199.201	44.045	38.016	40.812	45.906	10961.7	2366.78	3521.77	8414.95
565	17701.2	8326.69	12466.1	14979	7788.27	6781.3	7666.42	7597.85	5.288	70.898	135.066	198.785	43.969	38.133	41.126	46.17	9912.97	1545.39	4799.71	7381.15
566	21212	8093.62	9666.67	14701	7839.57	7073.61	7483.22	7696.65	5.215	70.967	135.083	198.888	43.95	37.926	40.884	45.926	13372.4	1020.02	2183.45	7004.35
567	18958.3	12307.8	12936.8	13993	9031.48	7418.03	6942.73	6874.07	5.149	70.899	134.997	198.976	43.915	38.034	40.729	46.065	9926.8	4889.74	5994.04	7118.93
568	18436.3	8559.76	10427.3	17951	7432.13	7385.98	6917.19	6463.93	5.127	71.034	134.964	199.003	44.116	38.097	41.015	45.842	11004.2	1173.78	3510.09	11487.1
569	18979.7	10100.6	10910.6	13358	9739.01	6847.01	7768.59	6090.5	5.011	70.742	135.039	199.099	44.203	37.985	40.871	46.173	9240.7	3253.59	3141.98	7267.5
570	19337.1	8618.53	13677.5	14046	9005.1	5339.19	6474.16	6722.62	5.121	70.961	135.016	198.69	44.103	38.155	40.855	45.968	10332	3279.33	7203.34	7323.38
571	15298.8	8949.2	10155.4	13839	9181.71	6771.91	6840.56	8351.2	5.143	70.915	134.902	198.79	44.213	38.199	40.981	45.988	6117.05	2177.29	3314.82	5487.8
572	17352.9	8790.84	9707.32	11924	8193.88	7133.81	7005.26	6396.98	5.308	71.037	135.038	198.982	43.83	37.828	40.837	45.971	9158.99	1657.02	2702.05	5527.02
573	18179.3	8955.18	11893.4	16841	8266.07	7279.16	7974.39	6995.62	5.075	70.96	135.038	198.785	44.222	37.838	40.841	46.154	9913.19	1676.02	3919.01	9845.38
574	16072.2	8953.19	14842.8	11373	8795.15	7342.93	7500.54	6356.35	5.16	71.019	135.15	199.024	44.135	37.721	40.887	46.209	7277	1610.26	7342.28	5016.65
575	17947	8422.31	13005.4	15118	9311.05	8036.95	8210.43	6837.68	5.08	70.999	135.069	198.74	44.418	37.862	41.013	46.26	8635.96	385.359	4794.99	8280.33
576	16270.6	12028.9	11554.7	16512	8680.1	7378.21	7378.41	7610.2	5.098	71.17	135.09	198.923	44.104	37.812	41.064	45.915	7590.47	4650.67	4176.24	8901.8
577	18781.3	10530.9	12000	13705	8989.35	7209.24	8293.81	7220.2	4.96	71.041	134.934	198.989	44.153	37.884	40.892	45.995	9791.94	3321.64	3706.19	6484.8
578	14856.8	8651.39	11369.5	14117	7599.58	5736.38	8069.51	6265.02	5.162	71.408	135.149	198.789	44.048	37.929	40.995	45.97	7257.24	2915.01	3299.95	7851.98
579	17914.3	11048.8	9790.42	11452	9475.56	5002.22	6996.45	6216.27	5.265	71.087	135.07	198.993	44.212	37.894	41.222	45.987	8438.75	6046.59	2793.97	5235.73
580	19422.8	7564.74	12811.2	14193	8542.33	7688.65	7568.65	6656.98	5.188	71.174	135.102	198.91	44.093	38.115	40.975	46.035	10880.4	-123.903	5242.55	7536.02
581	16118.4	8040.84	10692.9	13390	6680.64	6850.25	7924.48	6547.77	5.332	70.933	135.105	198.858	44.045	37.995	40.972	45.961	9437.74	1190.59	2768.38	6842.23
582	16377.7	12628.5	10273.7	16110	7884.27	7611.93	7901.58	6805.5	5.058	71.016	134.939	198.586	43.982	38.036	40.845	46.01	8493.41	5016.56	2372.13	9304.5
583	15208.6	6645.42	9587.17	14656	8281.45	6551.15	7854.9	5882.5	4.981	71.007	135.162	198.638	44.074	37.916	40.895	45.977	6927.11	94.273	1732.27	8773.5
584	16100.3	10991	14336	12707	8295.38	6343	7147.06	6188.98	5.153	71.109	135.228	198.847	44.215	38.016	40.893	46.194	7804.96	4648.03	7188.98	6518.02
585	14602	9441.24	12917.8	12888	9096.34	6735.66	7106.84	5822.05	5.016	71.112	135.244	199.008	44.257	38.092	40.925	46.221	5505.69	2705.58	5810.95	7065.95
586	15551.3	9603.59	9243	15850	10062.5	7005.3	7464.14	6397.95	5.091	70.924	135.021	198.908	43.98	38.135	40.795	45.813	5488.75	2598.28	1778.86	9452.05
587	16392.3	9465.14	13081.3	12137	8729.57	6384.76	6762.76	6193.85	5.142	70.785	134.745	198.884	44.262	38.192	41.005	46.085	7662.77	3080.38	6318.54	5943.15
588	17679.8	8993.03	11792.2	14294	8048.06	7621.64	6680.56	6232.52	5.089	70.856	134.865	198.942	44.249	38.131	41.084	46.156	9631.76	1371.39	5111.68	8061.48
589	18702.4	9959.16	10613.4	15236	8309.3	6657	7066.03	7032.02	5.046	71.2	135.049	198.93	44.225	37.844	40.881	45.889	10393.1	3302.17	3547.34	8203.98
590	16933.5	7958.17	10853.7	11377	9364.54	6627.22	7261.86	6226.35	5.058	70.89	135.067	199.004	44.026	38.068	40.726	45.967	7568.94	1330.95	3591.8	5150.65
591	17321.3	8081.67	10514	13381	9035.51	7705.8	6903.98	7259.52	5	71.007	135.032	198.805	43.926	37.838	40.675	46.04	8285.8	375.872	3610.03	6121.48
592	22204.1	7836.65	13520.3	16014	8077	6922.11	7755.67	6568.25	5.041	70.98	134.961	198.648	43.974	37.88	40.92	46.196	14127.1	914.542	5764.66	9445.75
593	16853.4	6821.71	13101.2	15661	8064.18	6123.53	8936.77	5438.23	5.342	70.97	134.974	198.833	44.187	38.076	40.748	46.191	8789.26	698.182	4164.41	10222.8
594	15310	10785.9	8906.05	16104	7945.1	7138.99	7307.36	7105.15	5.058	70.929	134.997	198.92	43.762	37.976	40.873	46.119	7364.94	3646.86	1598.69	8998.85
595	16131.9	10286.9	10832	17109	7483.43	6034.19	7892.48	6699.23	5.373	70.837	135.236	198.76	44.084	37.807	40.808	46.092	8648.48	4252.66	2939.5	10409.8
596	18215.3	9504.98	12202.3	16626	8436.44	6359.19	7442.41	7318.68	5.182	71.178	134.966	198.975	43.963	38.096	40.858	46.03	9778.89	3145.79	4759.94	9307.33
597	14213.1	9896.41	11340.6	13219	9654	6137.77	6368.77	6590.68	5.284	70.904	135.172	198.982	44.044	37.863	41.183	46.14	4559.08	3758.64	4971.79	6628.32
598	18266.1	12086.7	9645.89	13602	9168.88	7648.51	6647.38	6233.18	5.176	71.31	134.981	198.927	44.014	37.964	40.721	46.006	9097.18	4438.15	2998.51	7368.82
599	14235.6	7659.36	11231.3	13253	8777.93	7887.4	8752.98	7922.52	5.11	71.005	135.168	198.842	44.155	37.952	40.877	45.83	5457.69	-228.037	2478.28	5330.48
600	17307.8	7891.43	10315.3	19894	7758.6	6968.4	8626.74	6460.35	5.066	71.225	135.014	198.843	44.015	37.934	40.822	45.861	9549.18	923.033	1688.53	13433.6
601	20927.8	8555.78	12814.8	13263	8712.71	7239.02	8206.32	7089.23	5.577	71.017	135.017	198.789	44.149	37.965	40.762	45.961	12215.1	1316.76	4608.49	6173.77
602	17098.1	10462.2	10676.6	9812	8424.72	7613.87	6870.51	7350.52	5.111	70.742	134.868	198.657	44.288	38.048	41.051	46.009	8673.36	2848.28	3806.1	2461.47
603	18439.7	9154.38	11938.6	14047	7477.56	8081.95	7539.3	6745.7	5.199	71.045	135.273	198.95	44.006	38.238	40.866	46.035	10962.1	1072.43	4399.28	7301.3
604	13819.6	7793.82	11372.2	13821	8851.21	6296.39	7148.53	7242.3	5.08	70.906	134.886	198.761	44.171	38.127	40.808	45.881	4968.4	1497.43	4223.65	6578.7
605	17408.1	10210.2	10545.6	13202	8504.23	6770.29	7346.41	7283.57	5.278	71.41	134.949	198.884	44.108	38.087	41.179	45.836	8903.89	3439.87	3199.21	5918.43
606	16126.3	8548.81	13028.9	11624	9075.82	6993	7350.81	7033.98	4.976	70.875	134.864	199.165	44.121	37.957	40.609	45.966	7050.45	1555.8	5678.09	4590.02
607	15127.4	11755	11190.6	13467	8303.81	6054.58	7004.68	7112.95	5.166	71.211	134.947	198.804	44.185	37.731	40.777	46.068	6823.59	5700.4	4185.93	6354.05
608	19093.6	8451.19	11068.7	11874	8953.44	7257.79	6763.64	6631.62	5.141	71.054	134.845	198.808	43.915	37.855	40.909	45.845	10140.1	1193.4	4305.01	5242.38
609	19458.8	7664.34	9058.72	15897	8933.65	7652.07	8402.44	6845.15	5.239	71.039	134.981	198.891	44.056	37.943	40.977	45.849	10525.2	12.276	656.278	9051.85
610	23918.8	8980.08	9243	11391	9385.43	7831.08	7005.26	6409	5.145	70.736	135.072	198.829	44.085	38.093	40.662	46.063	14533.4	1149	2237.74	4982
611	14625.7	8394.42	10869	13967	7537.29	6770.94	7569.24	6970.27	5.032	71.207	135.04	199.016	44.121	37.826	40.849	46.381	7088.42	1623.48	3299.77	6996.73
612	13514.1	7706.18	9346.88	17590	7944.36	6929.23	7469.42	6935.18	5.232	71.08	134.929	198.79	44.104	37.957	40.998	46.006	5569.73	776.942	1877.46	10654.8
613	18909.8	11161.4	12953.9	14213	6634.1	7485.68	7478.23	7473.38	5.261	70.882	135.075	198.57	44.01	38.167	40.724	46.197	12275.7	3675.67	5475.7	6739.62
614	17024.8	9893.43	9749.77	14026	8274.86	6482.84	6718.14	7498.4	4.993	70.86	135.051	198.925	44	37.752	40.749	46.373	8749.94	3410.58	3031.64	6527.6
615	14099.2	11094.6	9465.22	15335	7868.15	5587.15	6058.15	7110.35	5.249	71.018	134.787	198.751	44.212	38.087	40.773	46.169	6231.06	5507.47	3407.07	8224.65
616	14180.4	10372.5	10692.9	14066	7735.88	5971.39	7211.36	6690.12	5.02	70.9	134.893	198.929	44.423	37.918	41.002	46.16	6444.5	4401.12	3481.5	7375.88
617	16554.7	9736.06	10538.4	15680	9522.83	6806.55	6696.41	6848.73	5.109	70.774	134.931	199.009	43.923	37.875	40.81	46.169	7031.85	2929.51	3841.98	8831.27
618	16007.9	13772.9	9636.86	17983	9880.81	6976.82	7251.29	7416.18	5.287	70.809	134.996	198.952	44.156	38.006	40.961	46.157	6127.09	6796.09	2385.57	10566.8
619	16723.8	9510.96	10052.4	13941	7814.29	6181.8	6476.22	7009.6	5.059	70.988	134.771	198.948	44.136	38.119	41.117	46.023	8909.5	3329.16	3576.17	6931.4
620	15294.2	13736.1	9429.09	17403	10434.8	7704.83	7690.79	6368.38	5.095	70.957	134.923	198.675	44.13	37.905	40.818	46.099	4859.44	6031.23	1738.3	11034.6
621	15120.6	10213.1	12451.7	17714	8801.75	6654.08	6585.73	6804.52	5.062	70.881	134.949	198.893	43.904	37.997	41.156	45.971	6318.88	3559.06	5865.94	10909.5
622	16202.9	7875.5	12003.6	12184	9308.12	7322.21	7746.27	7964.45	5.286	71.314	134.853	198.856	44.126	37.918	40.85	45.606	6894.81	553.287	4257.34	4219.55
623	18036.1	10172.3	11194.2	12354	7957.19	6773.21	6499.71	6319.95	4.852	71.067	135.004	198.894	44.102	37.716	41.114	46.16	10078.9	3399.1	4694.51	6034.05
624	18770	12271.9	9532.97	10926	8392.11	6315.49	7930.35	7176.65	5.038	70.979	134.982	198.842	43.972	37.971	41.03	45.727	10377.9	5956.42	1602.62	3749.35
625	16098.1	12687.3	10723.6	17460	7616.8	7937.25	7784.15	6887.73	5.481	70.887	134.966	198.645	44.281	37.936	41.041	46.081	8481.28	4750	2939.43	10572.3
626	16890.6	11037.8	9414.63	13388	9564.23	7021.16	7954.43	7030.07	5.086	71.09	135.151	198.749	44.038	38.057	41.065	46.197	7326.41	4016.68	1460.21	6357.93
627	18465.6	8078.69	7831.98	16387	8490.67	7002.39	7414.23	6314.75	5.299	70.628	134.948	198.741	44.134	38.03	40.873	45.972	9974.94	1076.3	417.751	10072.2
628	15288.6	8392.43	12125.6	15123	7920.55	7100.15	8302.03	8050.57	5.229	70.8	134.948	198.705	44.002	38.066	41.238	46.19	7368.07	1292.28	3823.53	7072.43
629	14633.6	8593.62	9437.22	15568	7989.06	7346.49	7249.23	7059	5.247	70.83	134.91	198.61	44.017	37.919	40.918	45.954	6644.53	1247.14	2187.99	8509
630	14059.8	7969.12	10942.2	15851	7209.36	6770.62	7082.48	6996.93	4.954	70.917	134.931	198.979	43.958	38.023	40.916	45.969	6850.4	1198.51	3859.71	8854.08
631	18590.8	9466.14	10262	17250	8388.81	6441.73	6372	6925.43	5.188	70.924	135.133	198.865	44.058	37.838	40.786	45.983	10201.9	3024.4	3889.97	10324.6
632	17820.7	8718.13	12553.7	15830	8020.57	5767.78	7427.73	8636.55	5.146	70.721	135.212	198.752	44.308	37.955	40.833	45.924	9800.17	2950.35	5126.02	7193.45
633	16148.8	10467.1	7649.5	17506	8867.33	6316.14	7013.48	6836.05	5.2	70.971	134.982	198.91	43.916	38.168	41.025	45.883	7281.48	4151	636.021	10670
634	12307.8	10541.8	9171.64	12582	9477.4	7255.2	6614.5	5917.93	5.186	70.907	134.91	198.876	43.964	38.112	40.908	45.861	2830.38	3286.63	2557.14	6664.07
635	16313.4	8558.76	11341.5	16152	7916.88	5929.31	7665.24	6355.7	5.293	71.07	135.024	198.824	44.098	38.007	40.845	46.127	8396.53	2629.46	3676.22	9796.3
636	15865.8	7901.39	13300.8	15081	9035.51	6417.45	6938.62	7220.85	5.295	71.086	134.855	198.805	44.097	38.217	40.777	45.955	6830.33	1483.94	6362.19	7860.15
637	17793.7	11977.1	10257.5	15694	8007.02	6023.51	8055.71	7108.73	5.166	70.871	134.943	198.733	43.895	38.037	40.957	46.036	9786.67	5953.59	2201.74	8585.27
638	14954.9	11050.8	12895.2	15960	8306.37	6711.38	6758.65	7440.23	5.191	71.059	135.001	199.134	43.908	37.841	40.951	46.047	6648.53	4339.42	6136.56	8519.77
639	15228.9	8528.88	12406.5	15632	8081.03	6228.73	8093.59	6913.4	5.123	70.812	134.78	198.794	43.931	38.087	40.787	46.104	7147.83	2300.15	4312.92	8718.6
640	21841	7430.28	11546.5	14703	8988.61	7064.54	7484.69	7154.88	5.08	70.94	135.156	198.803	44.24	37.895	40.95	46.166	12852.4	365.737	4061.83	7548.12
641	19572.7	12316.7	9419.15	16948	9156.06	6857.69	8044.85	6337.82	4.908	70.971	135.003	198.741	44.006	37.981	40.902	45.932	10416.7	5459.04	1374.3	10610.2
642	19405.9	7057.77	9304.43	16735	8705.02	6910.78	6967.98	6697.6	5.413	71.008	134.81	198.883	44.058	37.974	40.759	45.891	10700.8	146.987	2336.45	10037.4
643	13847.8	7700.2	11925	14330	8905.07	6712.35	7824.07	7361.57	4.818	71.182	134.971	198.877	43.835	37.876	40.852	46.138	4942.73	987.849	4100.95	6968.43
644	19623.5	8038.85	9534.78	14243	9084.25	6412.28	6923.65	6585.8	5.012	71.165	135.001	198.949	43.992	37.999	40.882	46.178	10539.2	1626.57	2611.13	7657.2
645	18612.2	9410.36	9173.44	18068	8278.16	6478.31	6623.01	6560.77	5.034	71.097	135.132	198.932	44.173	38.249	40.77	46.148	10334	2932.05	2550.43	11507.2
646	16835.4	8314.74	11031.6	15672	8577.51	7177.52	7436.54	6136.32	5.197	71.002	135.05	199.153	43.912	37.828	40.833	45.99	8257.89	1137.23	3595.08	9535.67
647	17178.1	9807.77	9794.94	12863	7101.27	6143.28	7245.71	7098.32	4.908	71.174	135.234	198.917	44.21	37.743	41.081	45.757	10076.9	3664.49	2549.23	5764.68
648	18481.4	11594.6	8904.25	17258	8627.71	6573.81	7016.42	6346.93	5.041	71.079	134.964	198.828	43.951	37.995	41.258	46.022	9853.69	5020.82	1887.83	10911.1
649	17980.8	7305.78	9664.86	11714	9399.72	7094.97	7442.41	6385.93	4.872	70.966	134.903	198.599	44.245	38.111	40.994	45.894	8581.12	210.807	2222.45	5328.07
650	16992.1	7186.26	12957.5	12971	9658.77	7419	6603.05	7210.12	5.058	71.032	134.883	198.899	44.137	38.277	41.067	46.153	7333.34	-232.743	6354.49	5760.88
651	20228.9	8476.1	10565.5	12208	9397.52	6058.14	7782.97	7679.75	5.293	70.873	135.093	199.019	44.226	38.192	40.583	45.999	10831.3	2417.95	2782.52	4528.25
652	17880.5	9945.22	11158.1	12958	8144.79	5424.33	6603.64	6384.62	5.185	71.085	135.059	199.1	43.981	37.816	40.566	46.238	9735.71	4520.89	4554.45	6573.38
653	14469	8964.14	8931.35	18012	8184.36	7005.95	7054.58	6641.7	5.316	70.962	135.384	199.108	44.206	37.98	41.043	46.07	6284.64	1958.19	1876.76	11370.3
654	21536.6	9233.07	7336.95	15311	8912.77	6023.51	7250.11	7229.3	5.226	70.874	135.166	198.804	43.966	38.224	40.924	46.037	12623.9	3209.56	86.834	8081.7
655	18633.6	9343.62	8563.69	16451	8608.29	7351.02	8029.88	6310.85	5.154	70.985	134.932	198.864	43.978	37.952	40.708	45.985	10025.3	1992.61	533.808	10140.1
656	17802.7	11601.6	10705.5	18493	7883.54	7001.74	7415.11	6909.82	5.014	71.323	135.17	199.037	44.066	37.866	40.757	45.85	9919.17	4599.85	3290.4	11583.2
657	16427.3	9044.82	10196.9	13935	7729.65	6725.95	7174.37	7017.73	5.207	71.062	135.043	198.718	44.261	37.925	40.862	46.08	8697.63	2318.88	3022.56	6917.27
658	19809.5	7756.97	11675.7	13721	9331.93	6793.92	7418.93	7128.88	5.162	70.877	134.983	198.752	44.198	38.232	41.103	46.142	10477.5	963.048	4256.77	6592.12
659	18361.9	9496.02	12424.6	13057	7853.49	7514.17	7974.98	7261.48	5.106	70.84	135.082	199.215	44.05	38.188	41.044	46.14	10508.4	1981.85	4449.59	5795.52
660	21932.4	9332.67	11380.3	15565	10619.1	6192.16	6221.97	7049.57	5.161	71.15	135.13	198.959	44.001	37.693	40.804	45.827	11313.2	3140.51	5158.33	8515.42
661	16573.8	6755.98	11712.7	11253	7597.74	6907.55	7640.29	5550.68	5.244	71.07	135.269	198.822	44.209	37.975	41	45.85	8976.1	-151.568	4072.45	5702.32
662	17062	8635.46	10150	13763	7672.86	6383.79	7382.23	6489.93	5.014	71.082	135.063	198.881	44.164	38.085	40.938	46.251	9389.15	2251.67	2767.73	7273.07
663	15905.3	9046.81	9576.33	14139	9403.02	6368.58	7033.74	7460.05	5.089	70.894	135.079	199.074	44.293	38.125	40.978	46.095	6502.28	2678.24	2542.59	6678.95
664	16329.2	7953.19	9470.64	16533	7679.45	6851.87	7273.89	6806.48	5.315	70.935	135.056	198.974	44.214	37.926	40.807	46.036	8649.75	1101.32	2196.75	9726.52
665	16259.3	8994.02	11345.1	20165	8522.91	6849.28	6755.42	5861.38	5.382	71.096	135.137	198.937	44.159	38.046	40.779	45.982	7736.39	2144.75	4589.66	14303.6
666	19567.1	6541.83	13093.9	12081	7192.87	6085.66	6977.66	6668.35	5.237	70.789	135.049	198.898	44.085	37.771	40.935	46.198	12374.2	456.175	6116.28	5412.65
667	19250.3	6878.49	11380.3	13238	7967.08	7232.87	6312.99	5858.77	5.386	70.97	134.8	198.855	44.126	38.17	40.701	46.237	11283.2	-354.381	5067.32	7379.23
668	18159	8315.74	10747.1	12076	8837.29	5687.5	7368.72	7042.43	5.302	71.082	134.781	198.952	44.114	38.255	41.024	46.202	9321.67	2628.24	3378.34	5033.57
669	16561.4	11043.8	10088.5	12446	9311.42	7848.56	7948.26	6559.48	5.366	71.008	135.097	198.983	44.097	37.745	40.89	46.115	7250.03	3195.27	2140.27	5886.52
670	18175.9	8063.74	11264.7	16520	8255.81	6042.6	6547.85	7144.15	5.043	70.744	134.923	199.068	44.125	38.03	40.94	45.71	9920.07	2021.14	4716.82	9375.85
671	19341.6	6657.37	9418.25	16035	8504.59	7410.26	7566.89	6159.4	5.082	70.97	134.992	198.961	44.105	37.948	40.767	46.129	10837	-752.887	1851.36	9875.6
672	20028.2	8166.34	9939.48	17587	7969.65	6975.2	7462.96	7835.75	5.046	70.853	134.827	198.76	44.355	37.785	41.013	46.021	12058.5	1191.13	2476.51	9751.25
673	18131.9	7963.15	10457.1	17820	9130.78	6346.56	7770.64	6736.93	5.272	71.145	134.926	199.035	44.157	37.948	41.091	45.949	9001.13	1616.58	2686.45	11083.1
674	18915.4	10894.4	8066.85	15357	9387.99	6953.84	6822.36	7475.98	5.35	70.578	135.069	198.718	44.128	38.036	40.771	45.965	9527.45	3940.59	1244.49	7881.02
675	20859.1	9866.53	11188.8	16357	9560.57	6886.83	8531.32	7774	4.901	70.934	134.977	198.882	44.085	38.165	40.917	46.292	11298.5	2979.71	2657.47	8583
676	17304.4	8849.6	12117.4	15946	8484.81	7139.97	7517.28	6020.95	5.152	70.993	135.103	199.234	44.06	37.806	40.902	46.193	8819.59	1709.64	4600.16	9925.05
677	19770	9513.94	12321.6	13834	8975.79	7252.94	7372.54	7740.85	5.09	71.299	135.337	198.874	44.144	38.004	40.982	46.074	10794.2	2261.01	4949.05	6093.15
678	18069.9	11402.4	10832	14115	8967	6207.05	8891.26	7454.85	5.147	70.896	135.032	198.761	43.853	37.974	40.798	45.995	9102.9	5195.34	1940.72	6660.15
679	17497.2	8411.35	10603.4	15239	8149.18	8160.61	7770.64	7035.27	5.202	70.945	135.175	198.981	43.955	38.096	40.863	46.129	9348	250.747	2832.79	8203.73
680	17469	8680.28	12347.8	16147	7514.2	5968.15	7206.37	7420.4	5.076	71.113	134.84	198.88	44.099	38.002	40.8	45.89	9954.79	2712.13	5141.42	8726.6
681	17505.1	7757.97	15558.3	14801	8262.4	6980.38	6392.25	6545.18	5.047	71.002	135.206	198.806	44.09	38.014	40.945	46.098	9242.67	777.59	9166.01	8255.83
682	18460	8139.44	10832.9	13660	8407.86	6583.84	7603	6898.77	5.014	71.033	135.154	199.07	44.256	37.968	40.854	45.966	10052.1	1555.6	3229.88	6761.23
683	22790.3	9467.13	11280.9	14634	8172.27	7099.83	5531.46	7842.9	5.186	70.979	135.081	198.902	44.038	37.935	41.063	45.963	14618	2367.31	5749.48	6791.1
684	19022.5	7275.9	8632.34	14899	8663.61	6964.52	5908.42	7960.88	4.895	71.255	135.39	198.641	44.117	37.925	40.958	46.17	10358.9	311.379	2723.92	6938.12
685	14912.1	6804.78	11224	14909	8941.71	6401.59	7478.52	7021.95	5.127	70.939	134.89	198.953	43.818	37.912	41.026	46.006	5970.35	403.187	3745.51	7887.05
686	14749.7	9176.3	8894.31	15074	7144.14	6974.23	7525.2	5677.75	5.082	71.168	135.181	198.814	44.068	37.868	40.975	45.989	7605.58	2202.07	1369.11	9396.25
687	18506.2	10409.4	10093	11590	9316.55	6312.9	7538.41	6613.1	5.047	70.959	134.988	198.964	43.952	38.068	41.152	45.904	9189.66	4096.46	2554.63	4976.9
688	16876	8595.62	12746.2	12753	7824.55	6981.67	7197.56	6281.93	5.296	70.953	134.927	198.73	43.821	38.087	40.958	45.87	9051.44	1613.94	5548.6	6471.07
689	20922.2	11632.5	13215	17420	9365.64	6917.9	7496.43	7067.77	5.119	70.537	134.697	199.026	44.258	38.009	40.889	46.068	11556.6	4714.57	5718.56	10352.2
690	13892.9	10172.3	9884.37	16311	8099.72	5721.81	7243.65	8060.32	5.156	71.056	135.032	199.124	44.186	37.95	41.07	46.216	5793.18	4450.5	2640.72	8250.67
691	16511.8	7785.86	9228.55	11959	8237.12	7480.5	7317.05	7715.5	5.268	70.949	134.91	198.633	44.195	38.065	41.101	46.111	8274.72	305.354	1911.49	4243.5
692	21195	9893.43	13085.8	15225	8264.6	9129.13	8760.03	5809.7	5.207	71.015	135.031	198.847	44.002	37.912	41.07	46.074	12930.4	764.293	4325.79	9415.3
693	21208.6	9238.05	8414.63	13690	7458.88	5928.98	7750.09	5744.05	5.078	71.171	134.964	198.866	44.341	37.86	41.045	45.808	13749.7	3309.06	664.544	7945.95
694	17701.2	10537.8	9766.03	17893	8156.51	6833.09	6253.98	6418.75	4.83	71.027	134.885	199.021	43.972	38.025	40.832	46.334	9544.73	3704.76	3512.06	11474.2
695	16621.2	7886.45	9023.49	13995	8511.92	6648.9	7792.66	7103.85	4.965	70.942	134.995	198.813	44.23	37.735	40.872	46.034	8109.27	1237.55	1230.83	6891.15
696	19038.3	6550.8	9752.48	15609	7346.39	7357.49	9121.43	5369	4.914	70.959	135.253	198.955	44.354	37.968	40.964	45.887	11691.9	-806.697	631.052	10240
697	13835.4	14002	8751.58	16251	8799.92	6743.1	6265.13	7189	5.004	70.866	134.996	198.931	44.003	37.943	41.091	45.968	5035.48	7258.89	2486.45	9062
698	17572.7	10545.8	11096.7	13675	8109.61	5794.65	7345.53	8405.48	5.136	71.097	134.959	199.027	44.236	37.961	40.841	45.694	9463.11	4751.17	3751.13	5269.52
699	15422.8	6977.09	9746.16	14676	8151.02	8278.11	6786.54	7108.07	4.914	71.11	134.991	199.021	43.97	37.968	40.965	46.026	7271.76	-1301.02	2959.62	7567.93
700	20391.2	13666.3	9859.98	15262	8671.67	6236.83	7840.22	6063.2	5.008	70.965	134.843	198.921	44.271	37.986	40.772	46.048	11719.5	7429.51	2019.76	9198.8
701	16812.9	10293.8	13947.6	12215	7411.25	6300.27	6564.88	6499.02	5.4	71.176	134.77	198.946	43.989	38.024	40.851	46.033	9401.61	3993.55	7382.72	5715.98
702	18199.5	8414.34	11915.1	16323	10163.3	6005.7	7669.06	6751.88	4.91	70.883	135.191	199.056	44.154	38.169	40.798	46.009	8036.25	2408.64	4246.02	9571.12
703	18638.1	8728.09	8486	12038	8441.21	7044.8	6746.61	7619.3	5.087	70.801	134.7	198.821	44.051	37.679	41.016	45.938	10196.9	1683.29	1739.39	4418.7
704	22644.9	11331.7	10024.4	13482	8240.42	7260.06	7860.77	6805.82	5.081	70.875	134.74	199.181	43.899	37.996	40.745	46.17	14404.5	4071.61	2163.62	6676.18
705	17460	8620.52	8766.94	13248	8196.82	7235.13	7568.95	6363.5	4.945	71.098	135.182	198.902	44.149	37.805	40.969	45.928	9263.16	1385.38	1197.99	6884.5
706	15830.9	7696.22	7112.92	16121	8119.14	6303.19	7387.51	6791.85	5.115	71.019	135.158	199.019	43.965	38.057	40.691	46.223	7711.75	1393.03	-274.592	9329.15
707	19347.2	10405.4	10657.6	18639	8572.38	6901.07	6561.65	6240.98	5.1	70.998	134.938	198.811	43.816	37.895	40.995	46.115	10774.9	3504.31	4095.98	12398
708	15315.7	12953.2	12361.3	16844	8335.68	7572.76	6876.08	6665.43	4.991	71.001	135.213	198.82	44.091	37.969	40.913	46.068	6979.99	5380.43	5485.25	10178.6
709	17580.6	9672.31	11696.5	13702	7860.82	6202.19	6844.67	6942.32	4.791	71.073	135.21	198.64	44.237	38.203	41.263	45.877	9719.79	3470.12	4851.81	6759.68
710	19613.3	10477.1	11739.8	14044	9341.46	6991.06	8787.62	7163.65	5.29	71.147	134.854	198.835	44.033	37.723	40.828	45.901	10271.8	3486.03	2952.21	6880.35
711	13118.4	10306.8	12767.8	11529	8575.31	6610.06	7035.21	6829.23	5.004	71.09	134.774	198.738	43.97	38.289	40.973	45.84	4543.07	3696.71	5732.63	4699.77
712	23311.2	8933.27	11551.9	15103	8909.47	6519.42	8004.34	6915.02	4.973	70.687	135.15	198.784	43.997	38.056	40.936	45.655	14401.7	2413.84	3547.61	8187.98
713	20272.8	10416.3	9252.03	11890	8652.62	6335.56	7017.01	7766.85	5.177	70.84	135.108	199.027	43.926	38.086	40.664	46.041	11620.2	4080.78	2235.03	4123.15
714	16364.1	10427.3	8383.02	11346	9334.5	5637.97	7555.44	6352.45	5.29	71.169	135.037	198.947	44.259	37.95	40.876	46.024	7029.65	4789.32	827.575	4993.55
715	19275.1	12214.1	12655.8	13316	7924.94	7107.27	7922.72	6996.27	5.096	70.959	135.081	199.019	44.149	38.01	41.087	46.044	11350.1	5106.87	4733.11	6319.73
716	21416	9803.78	12077.7	16183	8278.89	6388	6860.82	6635.52	5.108	70.849	134.872	198.921	44.207	37.864	41.004	45.981	13137.1	3415.79	5216.87	9547.48
717	15685.5	7760.96	11224.9	16920	8092.02	7630.38	6748.67	6279.32	4.915	70.924	135.041	198.943	44.061	37.914	40.828	46.004	7593.43	130.578	4476.27	10640.7
718	17869.2	7630.48	9799.46	11706	9569	7214.74	7320.28	7870.85	5.081	70.981	135.271	198.762	44.125	37.969	40.766	46.157	8300.23	415.737	2479.18	3835.15
719	11783.5	13796.8	10411.9	15398	7371.67	7305.7	7678.75	7280.32	4.886	70.917	134.965	198.873	44.403	37.809	41.027	45.927	4411.87	6491.11	2733.18	8117.68
720	16558.1	11114.5	8742.55	17447	8973.59	6178.88	7780.04	5829.2	5.323	71.036	135.033	198.924	44.134	38.073	40.888	46.044	7584.47	4935.66	962.511	11617.8
721	17000	6911.35	12639.6	13149	8289.51	6699.08	7120.94	5737.23	5.058	71.004	135.118	198.721	44.198	38.058	40.758	46.255	8710.49	212.276	5518.63	7411.77
722	17748.6	9708.17	10804	16912	8945.01	7034.76	6847.61	7131.15	5.15	70.994	135.068	198.89	43.862	37.827	41.198	46.138	8803.58	2673.41	3956.37	9780.85
723	14920	13578.7	9686.54	16467	7549.01	6321.64	8221.3	7096.7	5.216	71.114	134.956	198.802	44.163	37.904	41.107	46.196	7370.94	7257.05	1465.24	9370.3
724	18447.6	13687.3	7700.99	14829	7991.63	6247.83	8083.9	7786.35	5.137	71.059	134.961	198.805	44.373	38.016	41.131	45.971	10455.9	7439.42	-382.903	7042.65
725	15794.8	9101.59	8522.13	16168	7417.48	8168.7	7909.8	7253.35	5.145	71.238	134.792	198.914	44.132	37.91	41.076	46.262	8377.34	932.893	612.331	8914.65
726	18971.8	9390.44	11361.3	12898	8955.64	7173.31	7610.34	6484.73	5.211	71.183	134.988	198.815	44.035	37.86	41.061	45.91	10016.2	2217.13	3750.99	6413.27
727	17770	7602.59	9903.34	13615	8772.07	6496.12	7874.28	7012.2	5.262	70.753	134.925	198.774	44.167	37.801	41.032	45.986	8997.94	1106.47	2029.07	6602.8
728	14954.9	8418.33	9883.47	14440	8695.86	6801.69	6886.36	6685.25	5.241	70.999	135.106	198.888	44.429	37.75	40.941	45.999	6259.05	1616.63	2997.11	7754.75
729	16261.6	10204.2	12285.5	16753	8343.74	7776.05	8775.88	6707.68	5.186	71.074	134.864	198.935	44.182	37.984	40.797	46.116	7917.81	2428.14	3509.57	10045.3
730	20434	8476.1	11167.1	16514	6989.88	6237.15	7529.61	6474	5.322	71.009	135.048	198.813	43.854	37.763	40.692	45.874	13444.2	2238.94	3637.51	10040
731	17797.1	9852.59	10766.9	15437	7883.17	6757.67	7617.39	5257.2	5.263	71.048	135.079	198.825	44.069	38.107	41.177	46.093	9913.9	3094.92	3149.55	10179.8
732	13470.1	10498	9544.72	15990	8829.96	5607.55	7340.24	7451.27	5.003	70.831	135.129	198.957	44.224	38.214	40.775	45.98	4640.16	4890.46	2204.47	8538.73
733	16491.5	7980.08	13264.7	11570	8359.13	6340.41	7239.54	5757.38	5.179	70.979	135.203	199.007	44.088	37.825	41.051	46.281	8132.41	1639.67	6025.14	5812.62
734	20316.8	9513.94	11127.4	16225	8417.76	7383.07	7912.15	6487	5.021	71.161	135.035	199.019	43.943	37.931	40.87	45.969	11899	2130.88	3215.22	9738
735	14100.3	11470.1	8972	15770	8220.63	8021.74	6736.04	6125.93	5.264	70.906	135.029	198.857	43.962	37.759	40.962	45.994	5879.71	3448.38	2235.95	9644.08
736	17534.4	9534.86	11990.1	11917	7654.54	7143.53	7640.88	7162.68	4.978	71.079	134.902	199.157	43.998	37.905	40.715	46.098	9879.85	2391.34	4349.19	4754.32
737	13476.9	8325.7	11523	13600	9478.13	6851.22	7752.73	6823.05	4.897	71.081	135.065	198.911	44.13	38.093	40.72	46.284	3998.76	1474.48	3770.3	6776.95
738	18342.7	10197.2	11013.5	12302	7532.16	6878.09	7021.12	7019.35	5.148	70.85	135.049	199.08	44.136	37.903	40.72	45.952	10810.6	3319.12	3992.43	5282.65
739	17112.7	7535.86	10742.5	11050	8071.87	6886.18	6709.33	6978.07	4.92	70.714	135.189	199.057	44.016	37.927	40.916	45.936	9040.87	649.676	4033.22	4071.93
740	13643.7	8379.48	10215.9	17706	8912.77	6872.91	6935.39	6269.25	5.158	71.126	134.847	198.914	44.181	38.144	40.856	46.058	4730.98	1506.57	3280.51	11436.8
741	17467.9	11072.7	12714.5	20415	7630.72	7703.21	8085.37	6320.93	5.169	71.21	135.091	199.014	43.948	38.045	41.104	45.871	9837.15	3369.5	4629.18	14094.1
742	20009	7908.37	10409.2	15085	8742.39	6255.93	7308.83	6613.75	5.313	71.014	134.975	199.038	44.238	37.833	41.059	46.017	11266.6	1652.44	3100.38	8471.25
743	14354	8700.2	9211.38	11486	7519.7	6741.16	8534.85	6138.27	4.998	70.947	135.016	198.83	44.002	38.086	41.056	46.143	6834.3	1959.04	676.536	5347.73
744	16524.2	10998	8583.56	16362	8483.71	7019.55	6286.56	6945.25	5.107	71.087	134.873	198.871	44.217	37.887	40.868	46.021	8040.53	3978.46	2297	9416.75
745	17399.1	7937.25	12599.8	11014	8091.29	6707.82	7729.25	7007	5.044	71.167	134.905	199.025	44.039	37.838	40.93	46.12	9307.81	1229.43	4870.57	4007
746	12049.6	10880.5	10393.9	19995	8295.01	6862.23	6445.39	6518.52	5.274	70.799	134.837	198.895	43.952	38.056	41.145	46.233	3754.59	4018.25	3948.46	13476.5
747	12994.4	12765.9	11202.3	15335	7306.82	6582.22	7335.84	6402.82	5.003	70.998	135.343	198.713	44.003	37.857	40.941	46.061	5687.54	6183.72	3866.51	8932.17
748	21448.7	8231.08	10764.2	12035	9863.58	7066.16	7502.89	6409.65	5.039	70.96	135.014	198.868	43.796	38.152	40.711	46.003	11585.1	1164.91	3261.34	5625.35
749	19339.3	11131.5	9869.01	16675	8476.01	6423.61	7621.21	6821.75	5.115	70.728	134.787	198.98	44.208	38.213	40.905	45.933	10863.3	4707.87	2247.81	9853.25
750	20053	12120.5	9944.9	16489	8758.51	6886.5	7524.03	7028.77	5.243	70.869	135.064	199.018	44.307	37.856	40.968	45.85	11294.5	5234.01	2420.87	9460.23
751	20763.2	9040.84	11837.4	10761	7556.71	6070.77	7600.95	7259.2	5.082	70.771	135.126	198.983	44.127	38.053	40.706	46.236	13206.5	2970.07	4236.45	3501.8
752	18801.6	10991	10939.5	12527	8791.12	6408.07	7700.77	5782.4	5.177	70.771	135.104	198.755	44.013	38.042	40.821	45.874	10010.5	4582.97	3238.71	6744.6
753	17471.3	11483.1	9536.58	18480	7490.76	5861.01	6441.28	6350.5	4.967	71.207	135.045	198.988	44.009	38.023	40.997	46.172	9980.5	5622.06	3095.3	12129.5
754	18829.8	9398.41	11838.3	19133	8521.08	6014.44	7263.62	6581.9	4.925	71.178	135.048	199.056	44.053	38.034	41.007	45.869	10308.7	3383.96	4574.68	12551.1
755	18398	11911.4	11504.1	14635	8649.32	6949.63	5998.26	7449.65	5.063	70.992	134.72	198.907	43.853	37.83	40.875	45.948	9748.65	4961.73	5505.8	7185.35
756	12820.7	11275.9	8838.3	14537	8231.26	8052.81	7615.92	6362.2	5.112	71.066	134.872	198.837	44.086	37.834	40.993	46.337	4589.49	3223.08	1222.38	8174.8
757	16551.3	9506.97	10205.1	15352	8475.28	6598.08	8317.59	6695.32	5.188	71.209	135.054	198.804	43.839	37.89	40.94	45.915	8076.02	2908.89	1887.47	8656.67
758	20412.6	11336.7	11678.4	13655	8015.44	7068.43	6489.72	6835.4	5.011	71.008	134.994	199.017	44.047	37.939	40.749	45.932	12397.2	4268.23	5188.69	6819.6
759	18967.3	9625.5	12014.5	11829	7880.24	6656.35	6917.48	7116.2	5.146	71.066	135.007	198.938	43.937	37.886	40.978	46.104	11087.1	2969.15	5096.97	4712.8
760	16616.7	11400.4	8858.17	15798	7743.57	6851.22	8164.63	6767.48	4.966	70.993	135.17	198.965	44.113	38.035	40.891	46.222	8873.11	4549.18	693.541	9030.52
761	17416	9686.25	12009	13527	7880.24	6156.23	7457.09	6869.52	5.064	71.525	134.778	198.705	44.236	37.749	40.798	46.012	9535.77	3530.03	4551.94	6657.48
762	16784.7	7707.17	10664.9	11114	7458.51	6765.76	7255.4	7239.7	5.201	70.827	135.234	198.846	44.151	37.798	40.754	45.976	9326.16	941.409	3409.46	3874.3
763	19680.9	8667.33	12462.5	14802	8201.58	6903.34	8512.24	6419.4	5.248	71.048	134.909	199.012	43.971	38.155	40.942	45.898	11479.4	1763.99	3950.27	8382.6
764	17735.1	9972.11	9679.31	15252	8098.25	7187.87	7096.27	6189.95	5.009	70.972	135.06	198.829	44.242	38.052	41.074	46.137	9636.81	2784.24	2583.04	9062.05
765	17991	10457.2	10056.9	13960	7839.94	7211.83	7967.64	7387.57	4.966	70.985	135.183	198.876	44.213	37.949	40.729	46.298	10151	3245.34	2089.27	6572.43
766	18655	9700.2	10681.1	13176	8847.55	6885.21	7395.73	8073.65	5.106	70.916	135.03	199.058	44.02	37.749	40.885	46.045	9807.47	2814.99	3285.39	5102.35
767	20154.5	10033.9	10867.2	11148	7736.61	7666.96	7703.12	6086.27	5.285	71.105	135.15	198.997	43.859	37.783	40.772	46.047	12417.8	2366.91	3164.09	5061.73
768	20917.7	9431.27	7643.18	15855	8718.94	6783.89	7087.17	7007.32	5.005	70.877	134.989	198.825	44.095	37.987	40.874	45.989	12198.8	2647.39	556.007	8847.67
769	13174.7	12185.3	9529.36	15714	8334.58	8398.85	7746.27	6701.82	4.971	71.073	135.255	198.648	44.142	38.332	40.97	46.019	4840.16	3786.4	1783.09	9012.17
770	14876	8877.49	9239.39	16040	8775	6858.02	7588.03	6858.48	5.084	71.243	134.975	198.879	44.19	38.062	40.891	45.96	6100.99	2019.47	1651.36	9181.52
771	14558.1	12594.6	9649.5	13712	9180.98	7006.27	5219.96	8523.12	4.978	70.944	135.085	198.998	44.153	37.875	40.97	46.231	5377.09	5588.35	4429.54	5188.88
772	15991	9718.13	9084.01	20479	8648.96	6200.57	6562.53	5635.82	5.323	70.817	135.136	198.863	43.839	37.895	41.069	46.033	7342.02	3517.55	2521.48	14843.2
773	13281.8	11608.6	8022.58	15311	7104.57	6177.27	7025.52	7060.62	5.216	70.943	135.145	199.073	44.168	37.874	41.111	46.163	6177.28	5431.3	997.064	8250.38
774	13062	13556.8	6922.31	19430	7413.44	6420.69	6669.69	7363.52	5.181	70.894	135.157	198.763	44.235	38.126	40.804	46.076	5648.56	7136.08	252.62	12066.5
775	17040.6	10842.6	8216.8	11162	8686.7	8980.23	7524.62	7680.4	5.047	70.972	134.626	198.718	44.198	37.967	40.697	46.137	8353.89	1862.4	692.186	3481.6
776	18417.1	12665.3	7540.2	15138	7805.13	7533.27	7172.61	6914.7	5.114	70.872	134.895	199.057	44.079	37.915	40.902	46.024	10612	5132.07	367.593	8223.3
777	16889.5	11997	10020.8	15388	8020.57	8702.81	7229.56	6529.25	5.017	70.874	135.006	198.853	43.925	38.046	40.998	46.088	8868.94	3294.2	2791.22	8858.75
778	16151.1	8309.76	10730.8	15702	9805.33	7484.71	7532.25	6404.77	5.084	71.145	135.002	198.814	43.92	38.021	40.749	45.945	6345.74	825.05	3198.55	9297.23
779	18361.9	8520.92	12571.8	14557	7826.75	7239.67	7011.13	6429.8	5.137	71.133	135.256	198.723	44.22	38.113	40.975	45.765	10535.1	1281.25	5560.68	8127.2
780	17792.6	12038.8	11673.9	12505	9033.68	6886.18	7793.54	7117.5	5.111	70.891	135.281	199.145	44.108	38.129	40.97	46.151	8758.88	5152.66	3880.35	5387.5
781	18068.8	11475.1	9934.06	15712	8339.71	6712.35	8220.12	6143.48	5.043	71.112	135.131	198.751	43.982	37.655	40.916	46.004	9729.06	4762.75	1713.93	9568.52
782	17560.3	10653.4	10967.5	17331	8191.32	7601.57	6548.44	7451.93	5.138	70.996	134.883	198.907	44.049	37.945	40.83	45.856	9369	3051.82	4419.04	9879.08
783	16018	9421.32	9306.23	13700	7517.14	7445.22	6806.21	6099.93	4.936	71.101	135.053	198.904	44.141	38.135	41.196	45.919	8500.9	1976.1	2500.02	7600.07
784	18443.1	7246.02	11983.7	16336	9446.98	6687.1	7012.9	7582.57	4.974	71.149	135.075	198.706	44.238	37.868	41.038	46.333	8996.08	558.914	4970.85	8753.42
785	17159	7995.02	7112.01	17986	9185.37	6327.14	6957.7	7877.68	5.112	70.93	134.904	198.979	44.003	37.931	41.106	45.953	7973.59	1667.88	154.313	10108.3
786	14382.2	14358.6	8990.06	20466	8934.39	6338.8	7748.03	8052.2	5.218	70.853	134.982	198.856	44.093	38.123	40.641	45.997	5447.8	8019.77	1242.03	12413.8
787	18432.9	9082.67	8269.2	13180	8623.31	6370.84	6886.95	7264.07	5.262	71.087	135.052	199.02	44.107	38.004	40.777	46.092	9809.61	2711.83	1382.25	5915.93
788	17517.5	8416.33	10723.6	14947	7486.36	5642.51	8967.3	7092.15	5.217	71.006	135.064	198.879	44.297	37.82	41.012	46.072	10031.1	2773.83	1756.28	7854.85
789	19932.4	7854.58	10858.2	10090	7908.09	7688.65	6188.21	6526.32	5.125	71.046	135.033	198.793	44.417	37.781	40.917	46.006	12024.3	165.936	4669.96	3563.68
790	17214.2	8895.42	11766	14077	8704.28	5764.87	6607.75	7060.62	5.282	71.009	134.928	198.912	44.19	37.91	41.106	45.892	8509.92	3130.55	5158.29	7016.38
791	25543.4	8931.27	11619.7	15203	7702.9	6666.06	7938.57	6639.43	4.924	70.97	135.124	198.841	43.924	38.03	40.776	46.048	17840.5	2265.21	3681.12	8563.58
792	19172.5	10443.2	9767.84	15821	6974.49	6619.77	7835.82	6605.3	5.277	70.937	134.896	198.668	44.019	37.96	40.838	45.972	12198	3823.46	1932.02	9215.7
793	17393.5	7266.93	8503.16	11864	8262.77	6736.63	6610.68	6658.27	4.92	70.712	134.908	198.847	44.079	37.8	40.79	46.24	9130.69	530.304	1892.48	5205.73
794	20501.7	8545.82	10129.2	12995	9766.12	6073.03	8287.35	7106.12	5.022	70.897	134.984	199.111	44.064	37.975	40.939	45.979	10735.6	2472.78	1841.83	5888.88
795	15710.3	13171.3	7477.87	22572	8365.73	5538.6	6931.57	6933.23	4.814	71.134	134.96	198.891	43.886	37.822	41.24	45.79	7344.53	7632.72	546.296	15638.8
796	21358.5	9470.12	12759.7	13640	7772.52	6515.54	7305.6	6546.8	5.188	70.91	134.894	198.927	44.058	37.991	40.971	45.886	13586	2954.58	5454.11	7093.2
797	13963.9	11518.9	12582.7	16652	8820.43	6845.72	8071.57	6153.23	4.984	71.232	135.027	198.934	44.279	37.945	40.971	46.187	5143.49	4673.21	4511.09	10498.8
798	14341.6	8025.9	10516.7	15146	8472.35	7136.4	7543.99	6264.38	4.924	71.242	135.144	198.86	44.058	38.193	40.914	45.941	5869.25	889.492	2972.72	8881.62
799	18773.4	8364.54	9654.02	12998	8260.57	6768.35	7637.06	5939.38	4.984	70.814	135.194	198.5	44.1	37.682	40.677	46.141	10512.8	1596.19	2016.96	7058.62
800	16862.5	7666.34	11870.8	13530	7476.47	6330.38	7568.36	6234.48	5.13	70.933	134.922	198.907	44.016	37.675	40.802	46.08	9385.99	1335.96	4302.46	7295.52
801	18478	9019.92	11730.8	13308	9151.66	6025.12	8292.64	7530.57	4.956	70.586	135.085	198.982	44.07	37.97	40.984	46.174	9326.35	2994.8	3438.17	5777.43
802	15781.3	10406.4	12299	18685	8065.64	7631.35	6995.28	7130.18	5.149	70.898	135.096	198.854	44.095	37.911	40.978	46.402	7715.64	2775.03	5303.73	11554.8
803	17996.6	10888.4	8575.43	12542	8481.51	6287.33	7356.39	6434.35	5.332	71.011	135.238	199.216	43.742	38.128	40.705	46.256	9515.11	4601.12	1219.04	6107.65
804	15936.9	10557.8	8603.43	17145	8575.31	6516.83	6692.59	6458.4	5.194	71.216	134.92	199.078	43.986	38.02	40.802	46.133	7361.56	4040.94	1910.84	10686.6
805	15183.8	12147.4	13014.5	19628	9297.12	6546.94	7655.85	7022.6	5.023	71.119	135.107	198.706	44.105	37.758	41.03	45.89	5886.64	5600.47	5358.6	12605.4
806	15877.1	14360.6	9241.19	17997	8265.33	7220.24	7729.83	7471.43	5.138	71.055	135.236	199.107	44.43	37.974	40.808	46.04	7611.78	7140.31	1511.36	10525.6
807	15657.3	15797.8	7533.88	22512	6896.08	6083.39	6886.65	6487.98	5.099	71.09	134.892	198.917	44.081	37.827	41.062	46.001	8761.19	9714.42	647.222	16024
808	18175.9	9494.02	9956.64	14677	9520.26	6110.26	6202.01	6488.62	5.167	70.812	134.919	198.916	44.197	37.941	40.935	45.935	8655.61	3383.76	3754.63	8188.38
809	14665.2	12212.2	10192.4	17074	7443.86	7782.2	8052.78	6633.9	5.164	71.016	135.099	198.794	44.052	37.883	40.892	45.91	7221.31	4429.95	2139.63	10440.1
810	15549	10683.3	8467.93	16451	7445.69	7041.56	6352.91	7716.48	4.905	71.396	135.017	198.912	44.118	37.975	41.196	46.068	8103.35	3641.71	2115.02	8734.52
811	17073.3	8128.49	9088.53	16550	8898.48	6458.57	6949.19	7618.32	5.066	70.924	134.943	198.794	44.076	37.949	40.919	46.206	8174.8	1669.92	2139.34	8931.67
812	17536.6	11869.5	7341.46	18824	8657.75	7272.68	7347	7613.12	5.099	71.071	134.934	199.159	43.927	37.785	40.894	46.238	8878.89	4596.84	-5.532	11210.9
813	17665.2	9304.78	9680.22	18614	9031.12	6453.39	8363.98	6036.88	4.929	71.035	135.11	198.898	44.15	37.936	40.903	45.953	8634.05	2851.39	1316.24	12577.1
814	14984.2	11962.2	8627.82	14875	8393.94	5865.21	6299.19	7242.62	5.295	71.249	134.971	198.827	44.144	37.914	40.569	45.965	6590.28	6096.94	2328.64	7632.38
815	23023.7	11547.8	10738	16150	9446.62	7149.68	7742.75	7743.77	5.051	71.134	134.863	198.881	43.897	38.027	40.772	46.349	13577.1	4398.13	2995.28	8406.23
816	15005.6	12903.4	8038.84	14903	6653.16	7733.64	7093.34	7086.62	5.229	71.002	134.94	198.738	44.214	38.04	40.813	46.129	8352.48	5169.75	945.506	7816.38
817	16347.2	13652.4	7905.15	17852	7455.21	7458.49	9045.98	6305.32	5.165	70.793	135.123	198.773	44.179	38.036	40.965	46.061	8892.02	6193.9	-1140.83	11546.7
818	15939.1	10719.1	8564.59	17118	9481.79	5284.49	7058.69	8125	5.06	71.053	135.049	198.898	44.045	38.069	40.782	46.054	6457.33	5434.64	1505.89	8993
819	14817.4	14800.8	8720.87	19377	7870.35	5515.94	7969.69	6278.02	5.153	71.131	135.157	198.746	43.981	37.794	41.177	45.908	6947.01	9284.86	751.174	13099
820	16266.1	12598.6	12808.5	16202	7899.3	7683.79	7104.79	7031.7	4.903	70.983	135.057	198.73	44.279	38.141	41.059	46.161	8366.77	4914.82	5703.7	9170.3
821	15855.7	10609.6	7985.55	16209	9452.11	5998.26	7750.68	7437.62	5.173	70.677	134.957	198.819	44.323	38.247	41.121	45.905	6403.58	4611.31	234.869	8771.38
822	13418.3	8757.97	9737.13	14976	7904.43	6574.78	7062.81	6223.1	5.103	71.249	135.088	198.983	43.912	37.965	40.913	45.67	5513.84	2183.19	2674.32	8752.9
823	19041.7	13880.5	7549.23	17731	8658.48	8220.17	7128.27	7984.27	5.249	71.017	134.788	198.81	44.018	37.976	40.931	46.272	10383.2	5660.31	420.958	9746.73
824	15766.6	10455.2	10075.9	17874	7487.82	6955.78	7428.61	7556.25	5.043	70.967	134.856	198.757	43.825	37.934	40.868	46.131	8278.81	3499.4	2647.27	10317.8
825	19031.6	11155.4	10352.3	12630	8449.27	6820.47	7481.75	7023.25	5.193	70.991	135.099	198.933	44.114	37.757	41.185	45.974	10582.3	4334.91	2870.55	5606.75
826	16146.6	12459.2	8205.06	19350	8019.11	7296.64	6638.87	6361.88	5.147	71.143	134.674	198.656	44.348	37.81	41.223	46.046	8127.45	5162.52	1566.19	12988.1
827	15889.5	7074.7	10925	13683	8575.68	7520.97	6616.85	6214.32	4.99	71.069	134.984	199.034	44.245	37.907	40.723	46.183	7313.84	-446.264	4308.18	7468.68
828	13977.5	12565.7	8579.95	18219	9481.43	6447.88	8680.47	7355.07	5.036	71.176	134.953	198.665	44.155	37.886	41.34	45.855	4496.03	6117.85	-100.518	10863.9
829	13845.5	9619.52	9349.59	20578	6206.51	6217.08	7362.56	5992.02	5.104	70.93	134.926	199.137	44.088	37.991	40.91	46.012	7639.04	3402.44	1987.04	14586
830	18471.3	10814.7	11165.3	13466	7874.01	6640.49	7438.3	6891.95	5.188	70.853	134.901	198.754	44.151	37.932	40.986	45.967	10597.2	4174.25	3727.01	6574.05
831	17522	11347.6	11795.8	17478	8944.65	5828.96	6418.38	7349.55	5.004	71.058	135.106	198.795	43.965	38.014	40.728	46.237	8577.34	5518.65	5377.46	10128.5
832	21826.4	8449.2	11134.6	18515	7900.4	5917.98	6488.26	7548.45	5.133	71.035	135.018	198.868	43.944	38.153	40.846	46.182	13926	2531.22	4646.34	10966.5
833	23116.1	8297.81	12805.8	16727	7458.88	5677.79	7782.97	8001.82	5.197	70.853	134.998	198.818	44.124	37.987	41.025	45.761	15657.2	2620.02	5022.81	8725.17
834	16756.5	8503.98	9597.11	13736	7172.35	7009.84	6826.17	7452.57	5.263	71.003	134.851	199.089	44.043	37.737	40.778	46.104	9584.13	1494.15	2770.93	6283.43
835	18621.2	10758	11864.5	15981	7795.24	6571.22	8514	8045.38	5.132	71.323	135.042	198.745	44.157	37.958	41.013	46.242	10826	4186.75	3350.5	7935.62
836	18843.3	11495	11331.5	18164	9067.39	7590.89	7803.52	7162.02	5.063	70.878	134.955	199.081	43.938	37.854	40.746	45.806	9775.9	3904.13	3528	11002
837	18284.1	8065.74	8638.66	12493	8039.26	7115.04	7561.02	6780.8	5.071	70.982	135.228	198.997	44.066	37.766	40.89	45.785	10244.8	950.697	1077.64	5712.2
838	19148.8	9104.58	11955.7	17892	8924.49	6006.35	6817.66	6980.68	4.981	71.02	135.162	198.826	44.255	37.892	41.193	45.897	10224.3	3098.23	5138.08	10911.3
839	15873.7	10460.2	10668.5	17974	9279.54	5828.96	6303	6390.8	4.839	71.014	134.979	198.868	44.042	38.068	40.91	46.1	6594.19	4631.2	4365.47	11583.2
840	12147.7	11439.2	9756.1	18821	8280.35	8092.95	7573.94	7287.15	4.944	71.028	135.2	198.797	44.13	37.964	41.016	46.23	3867.33	3346.29	2182.16	11533.9
841	17361.9	13480.1	9659.44	17188	8491.04	7514.49	7746.86	7247.18	5.274	71.062	134.853	198.986	44.166	37.917	41	46.128	8870.86	5965.59	1912.58	9940.83
842	19581.7	7818.73	10131.9	11341	8293.55	6081.45	6742.5	6404.45	5.022	71.171	135.198	199.112	44.23	37.835	41.009	46.197	11288.2	1737.28	3389.39	4936.55
843	13843.3	7512.95	7492.32	9704	7511.27	6539.49	8319.06	6831.18	5.033	71.22	134.737	198.941	44.104	38.034	41.023	46.042	6332.02	973.456	-826.738	2872.82
844	7686.58	7540.84	6518.52	5990	6891.32	6186.65	6685.25	7088.9	5.019	71.185	134.99	198.811	43.652	38.057	40.726	45.841	795.265	1354.18	-166.733	-1098.9
845	8731.68	6675.3	7507.68	5738	7761.53	7720.69	6835.86	6193.2	4.623	70.962	134.874	198.999	44.193	38.175	41.118	45.967	970.152	-1045.39	671.816	-455.199
846	8600.9	5888.45	5807.59	6903	7133.88	6414.54	6451.27	6079.77	4.933	71.12	135.061	199.027	43.877	38.098	40.933	45.786	1467.02	-526.095	-643.676	823.225
847	8912.06	5685.26	6355.92	6694	7355.55	5785.91	7238.08	7095.73	5.206	71.094	134.99	199.337	43.935	37.958	41.023	45.767	1556.51	-100.646	-882.158	-401.724
848	7081.17	7924.3	6625.11	6994	6680.27	6435.26	6836.74	5447.98	5.246	71.227	135.057	199.027	43.733	38.028	41.051	45.901	400.902	1489.04	-211.63	1546.03
849	7128.52	7663.35	6161.7	8125	6890.95	7089.79	7664.36	7297.88	4.832	70.677	134.984	199.099	44.194	37.935	41.129	46.136	237.57	573.556	-1502.66	827.125
850	7896.28	4357.57	6115.63	6544	7580.89	5427.89	6261.9	6173.05	5.155	71.157	134.968	199.016	43.886	37.832	41.298	46.01	315.389	-1070.32	-146.273	370.95
851	9004.51	6229.08	7028.91	7799	7936.67	6216.76	8468.79	6203.27	5.052	70.966	134.816	199.153	43.899	38.01	40.98	45.698	1067.84	12.326	-1439.88	1595.72
852	6441.94	5863.55	6206.86	7180	6983.29	6246.54	7445.05	6261.77	4.884	71.308	134.899	199.066	44.042	38.182	41.016	46.124	-541.346	-382.992	-1238.19	918.225
853	6534.39	6868.53	6888.89	7981	9268.18	5833.81	6651.49	5984.55	4.976	70.97	134.906	198.879	43.895	37.874	41.327	45.716	-2733.79	1034.71	237.398	1996.45
854	6636.98	7240.04	7404.7	6705	6966.43	7554.31	6424.55	6877.65	5.136	71.25	134.909	199.342	44.17	37.666	40.952	45.65	-329.452	-314.267	980.149	-172.649
855	8155.58	7009.96	6679.31	5838	7761.89	5932.87	6754.25	7861.75	5.219	70.855	135.228	199.067	43.944	38.051	41.002	45.954	393.687	1077.09	-74.931	-2023.75
856	8166.85	6357.57	7104.79	5641	7941.06	5511.08	6018.81	8321.95	5.091	71.127	135.172	199.142	44.047	37.873	41.05	45.918	225.789	846.489	1085.98	-2680.95
857	7760.99	6526.89	6261.97	6419	8696.59	7001.1	6891.35	6098.95	5.216	70.829	135.227	198.714	44.22	38.127	41.016	45.699	-935.597	-474.202	-629.38	320.05
858	8000	5897.41	6182.48	7854	6961.3	6199.6	7112.42	7547.15	5.035	70.957	135.002	198.835	44.05	37.943	40.886	46.187	1038.7	-302.19	-929.945	306.85
859	8210.82	5627.49	7721.77	4908	7450.82	6542.73	7021.12	6495.12	4.87	71.025	134.972	199.123	44.033	38.165	41.13	45.967	760.006	-915.238	700.655	-1587.12
860	7258.17	5588.65	7497.74	6771	7623.03	9016.16	6834.98	6584.18	4.814	71.18	134.734	199.29	44.357	37.983	40.867	45.977	-364.852	-3427.51	662.76	186.825
861	7790.3	4381.47	4733.51	7604	8057.95	6126.77	7153.23	6443.12	4.837	71.16	134.732	199.044	43.717	37.828	40.944	45.961	-267.643	-1745.29	-2419.71	1160.88
862	10142.1	7513.94	5406.5	6722	6102.82	7516.76	6920.12	5690.43	4.763	71.3	135.133	198.967	44.284	38.151	40.923	45.973	4039.23	-2.813	-1513.62	1031.58
863	6998.87	10222.1	6503.16	4779	7402.45	8145.07	7183.18	6254.62	4.819	70.956	135.179	198.542	44.058	38.021	41.03	46.039	-403.578	2077.04	-680.013	-1475.62
864	7665.16	6991.04	6512.19	6254	7984.67	6477.34	7688.44	6298.5	5.025	71.23	134.886	199.324	44.139	37.837	40.941	45.999	-319.503	513.695	-1176.24	-44.499
865	9609.92	7560.76	6186.99	6867	7366.91	7758.89	6619.2	7449.65	4.766	70.708	135.204	199.092	43.753	37.976	40.863	45.937	2243.01	-198.131	-432.203	-582.649
866	7735.06	5682.27	8738.03	4581	8135.99	6969.37	7578.05	7108.07	5.105	71.191	134.982	198.94	44.134	38.072	40.993	45.825	-400.929	-1287.1	1159.98	-2527.07
867	6859.08	6406.38	7229.45	5658	7903.69	7647.53	7193.45	6448.65	5.057	70.913	135.127	199.146	44.034	37.991	40.986	45.631	-1044.62	-1241.16	35.998	-790.649
868	5759.86	4857.57	6850.05	5588	7379.37	6261.11	6687.6	5634.2	5.03	71.256	134.742	199.266	44.052	37.909	40.942	45.677	-1619.5	-1403.54	162.444	-46.199
869	6510.71	6370.52	7133.69	5117	7481.6	6180.18	7424.21	6445.73	5.121	70.792	135.027	198.982	43.876	38.091	40.908	45.913	-970.884	190.339	-290.514	-1328.72
870	7143.18	6514.94	7466.12	8113	6992.81	6577.69	5770.15	6213.35	5.001	71.214	135.059	199.123	44.245	37.808	40.928	46.02	150.366	-62.748	1695.98	1899.65
871	6943.63	6172.31	5616.98	5904	8126.83	6284.41	7472.06	6374.55	4.953	70.801	134.969	199.218	44.19	37.843	40.919	45.996	-1183.2	-112.101	-1855.08	-470.549
872	6039.46	5167.33	6469.74	6651	8262.4	7444.9	7369.31	6830.2	4.537	71.158	135.157	198.905	43.686	38.145	41.189	46.12	-2222.94	-2277.56	-899.57	-179.199
873	8510.71	5342.63	4620.6	4890	7347.49	6751.52	6151.81	6397.3	5.013	71.288	135.053	199.25	43.905	37.537	41.084	45.995	1163.22	-1408.89	-1531.21	-1507.3
874	9220.97	5296.81	4815.72	5948	9313.61	5636.03	5887.28	7187.7	5.077	71.06	134.99	198.977	43.884	37.729	40.976	45.849	-92.643	-339.217	-1071.57	-1239.7
875	8986.47	6274.9	8240.29	7270	7565.5	7123.13	7068.38	7891.32	5.148	71.032	134.992	199.136	44.054	38.231	40.873	46.007	1420.97	-848.231	1171.91	-621.324
876	7231.12	5606.57	6067.75	7198	7965.25	7085.91	7263.91	6822.73	4.774	70.952	134.69	198.856	43.95	37.93	40.735	45.832	-734.131	-1479.33	-1196.16	375.275
877	7392.33	6573.7	7616.08	6386	8256.17	6060.41	5919.87	6123.32	5.094	71.048	135.009	199.02	43.785	37.905	41.124	45.998	-863.838	513.297	1696.21	262.675
878	12039.5	5985.06	7347.79	5473	6593.43	6645.99	6504.11	7295.93	4.832	71.128	135.091	198.998	43.86	38.016	41.174	45.973	5446.03	-660.93	843.677	-1822.92
879	8105.98	6751	6210.48	7289	7073.79	8070.29	6936.86	7592.98	5.118	71.076	134.846	199.311	44.189	37.922	40.945	46.185	1032.19	-1319.3	-726.377	-303.974
880	6732.81	5870.52	5268.29	8477	7199.1	6011.2	6669.11	6316.05	5.344	71.15	134.836	199.181	43.997	37.951	41.078	45.918	-466.29	-140.686	-1400.81	2160.95
881	6397.97	5512.95	8682.93	4838	7488.19	6402.89	6861.11	6977.1	4.856	71.025	135.077	199.038	44.371	37.986	41.071	46.203	-1090.22	-889.939	1821.82	-2139.1
882	6565.95	7291.83	6521.23	5507	7472.44	6618.48	6072.24	6287.12	4.973	71.263	135.012	199.145	44.074	38.182	40.546	46.062	-906.482	673.357	448.984	-780.124
883	7086.81	8860.56	7426.38	6379	7650.51	7015.66	6136.83	7109.38	5.177	71.326	134.793	199.337	43.706	38.041	40.881	46.078	-563.697	1844.89	1289.54	-730.374
884	8307.78	5378.49	7271	6603	7048.51	7750.47	6495.01	7351.82	5.294	71.02	134.978	198.747	43.815	37.742	41.107	45.986	1259.27	-2371.99	775.994	-748.824
885	7602.03	6258.96	6482.39	6552	7033.85	7152.27	5567.28	6873.43	4.898	71.085	134.981	199.106	43.768	38.01	41.044	46.12	568.179	-893.301	915.108	-321.424
886	5788.05	5915.34	8005.42	7605	8650.79	6871.61	7565.43	6835.73	4.871	71.18	135.067	199.186	43.979	38.04	41.006	46.276	-2862.74	-956.274	439.995	769.275
887	7555.81	6635.46	6086.72	6136	8438.27	6706.85	7647.63	6854.57	5.041	71.081	134.774	199.207	43.939	38.09	41.001	46.341	-882.468	-71.388	-1560.91	-718.574
888	7502.82	6564.74	6630.53	5744	7340.9	6731.12	7259.21	6123.32	4.804	70.924	134.901	198.902	43.981	38.036	40.961	46.016	161.922	-166.383	-628.68	-379.324
889	6863.59	4943.23	6748.87	8202	8395.04	7254.88	6582.5	7662.52	5.221	71.198	135.09	199.311	43.902	38.074	40.841	45.974	-1531.45	-2311.65	166.373	539.475
890	7841.04	8217.13	6258.36	5753	7077.09	7695.77	7313.53	6522.75	4.877	70.94	134.927	199.135	43.726	38.006	40.863	46.247	763.952	521.365	-1055.17	-769.749
891	9188.27	5517.93	4482.39	5926	7912.49	6931.82	6480.04	7336.55	4.685	71.065	134.966	199.015	44.004	37.925	41.181	45.93	1275.79	-1413.89	-1997.65	-1410.55
892	7937.99	8242.03	7565.49	5538	8728.47	5943.88	6335.3	6524.7	5.015	71.012	135.022	199.243	44.209	37.777	40.865	46.087	-790.473	2298.16	1230.19	-986.699
893	8846.67	6008.96	6984.64	8550	7129.85	6634.66	5848.24	7761.65	4.854	70.989	135.042	198.94	43.813	37.982	40.819	45.945	1716.83	-625.696	1136.4	788.35
894	5889.52	7332.67	8457.09	8442	7742.48	5490.69	5619.83	5229.57	4.964	70.896	134.849	198.903	43.831	37.589	41.141	45.736	-1852.96	1841.98	2837.26	3212.43
895	6370.91	6169.32	5831.98	6373	7496.98	8179.06	6590.43	5904.6	4.869	70.878	134.686	199.456	44.017	38.093	40.901	45.929	-1126.07	-2009.73	-758.445	468.4
896	7520.86	5393.43	7310.75	5283	7725.62	7004.98	7255.69	6005.02	5.18	71.214	135.054	199.176	44.008	38.016	40.898	45.828	-204.762	-1611.55	55.059	-722.024
897	6656.14	7792.83	5371.27	5559	7896	7636.53	6694.65	7060.62	4.853	71.03	134.904	198.908	43.946	38.023	40.97	45.907	-1239.85	156.3	-1323.37	-1501.62
898	7863.59	8595.62	7069.56	6315	8377.45	7046.09	7276.83	5814.9	4.87	70.95	134.962	198.938	43.867	38.013	40.885	45.736	-513.866	1549.53	-207.271	500.1
899	9130.78	5799.8	7767.84	5362	7322.58	7244.85	7438.89	6069.05	5.072	71.162	134.922	198.978	44.002	37.914	41.341	45.984	1808.2	-1445.04	328.952	-707.049
900	10825.3	7664.34	5167.12	6641	7290.33	6313.87	7081.01	6750.9	4.683	70.796	134.72	199.04	43.946	37.708	40.808	45.721	3534.92	1350.47	-1913.89	-109.899
901	7350.62	6976.1	7689.25	6236	8012.88	6622.68	6495.6	6222.45	5.12	70.82	134.997	199.279	44.018	38.047	41.087	46.26	-662.259	353.411	1193.65	13.55
902	6275.09	6046.81	5886.18	6609	7140.47	6952.22	6548.15	5870.48	5.044	71.022	135.094	199.075	43.653	38.12	41.092	45.725	-865.388	-905.402	-661.968	738.525
903	7142.05	8458.17	6275.52	5459	8196.08	6479.61	7224.57	6529.57	5.073	71.132	134.644	198.822	43.922	38.04	40.833	46.201	-1054.03	1978.56	-949.05	-1070.57
904	6555.81	6115.54	6067.75	5818	6184.53	5317.18	7302.96	6004.38	4.952	70.771	135.079	198.997	44.057	37.759	41.244	45.908	371.28	798.357	-1235.21	-186.374
905	9865.84	5090.64	7831.98	4306	7175.65	5960.71	6883.72	5390.77	5.013	71.154	135.145	198.829	44.397	37.726	40.915	46.277	2690.19	-870.069	948.261	-1084.77
906	8866.97	4756.97	5551.94	8598	9307.75	7320.92	6763.35	7281.3	4.942	71.14	134.936	199.355	44.035	38.249	41.036	46.214	-440.783	-2563.94	-1211.4	1316.7
907	8323.56	6506.97	6659.44	5144	8581.17	6665.74	6291.55	6062.88	5.068	71.211	135.307	199.066	43.982	37.991	40.9	46.072	-257.609	-158.764	367.886	-918.874
908	5835.4	6522.91	6308.94	6077	7410.15	7648.51	7216.64	7576.73	4.788	70.864	135.008	199.176	43.899	38.219	40.913	46.215	-1574.74	-1125.6	-907.7	-1499.72
909	5956.03	7962.15	7156.28	8325	7414.91	6865.46	6824.41	6068.4	5.124	71.263	134.849	199.009	44.033	37.889	41.137	45.931	-1458.88	1096.69	331.865	2256.6
910	7475.76	5642.43	7576.33	4844	8586.3	5816.34	6915.72	6372.27	5.14	71.256	135.249	198.961	43.877	37.889	41.021	45.871	-1110.54	-173.903	660.614	-1528.27
911	7219.84	5835.66	6857.27	7651	8471.98	6124.18	7553.98	5885.1	5.025	71.234	135.074	199.018	43.951	37.87	40.848	45.814	-1252.14	-288.52	-696.702	1765.9
912	7464.49	4923.31	7034.33	5433	8682.67	5284.81	7967.64	6791.52	4.863	70.977	135.412	199.266	44.026	37.94	40.861	46.076	-1218.18	-361.503	-933.31	-1358.52
913	9249.15	5826.69	6964.77	6465	7934.84	6376.02	6720.78	6787.95	4.913	71.205	134.907	199.432	44.107	38.038	41.055	46.132	1314.32	-549.327	243.993	-322.949
914	5004.51	6189.24	6078.59	7250	8034.13	6404.51	6740.74	6967.02	5.028	71.252	135.112	198.938	44.009	38.085	41.005	46.039	-3029.62	-215.263	-662.149	282.975
915	6444.19	6202.19	8249.32	6413	8309.3	6307.07	7542.23	6879.27	5.003	71.067	135.108	199.248	43.956	38.095	41.05	45.854	-1865.11	-104.879	707.091	-466.274
916	8233.37	6672.31	6176.15	8343	7480.86	6181.15	7445.05	6668.68	4.733	71.205	135.144	199.041	44.197	37.588	40.96	46.197	752.508	491.16	-1268.9	1674.33
917	9904.17	5683.27	10316.2	6958	7204.23	5989.84	7049.59	6271.85	5.016	70.785	135.141	198.795	44.054	38.081	41.195	46.248	2699.94	-306.573	3266.58	686.15
918	6104.85	5061.75	5835.59	7162	8005.19	6145.22	7071.91	6106.75	5.428	71.046	134.899	198.675	43.744	37.898	41.038	45.903	-1900.34	-1083.46	-1236.31	1055.25
919	8233.37	6441.23	8148.15	7558	7883.91	5711.13	7031.39	6661.52	5.049	71.187	134.985	199.294	43.942	38.235	41.029	45.79	349.464	730.105	1116.76	896.475
920	7374.3	6857.57	7342.37	7038	7874.38	6719.47	6552.26	7282.6	4.839	71.117	135.049	199.223	43.886	37.931	40.932	46.047	-500.084	138.098	790.108	-244.599
921	9197.29	7842.63	6360.43	6260	8253.97	6536.58	6218.45	6114.88	4.959	71.029	134.898	198.959	44.048	38.227	40.86	45.788	943.32	1306.05	141.983	145.125
922	8882.75	6560.76	5756.1	5075	8224.3	7309.59	6819.42	7527.65	5.054	71.033	134.812	198.879	43.742	37.989	41.108	46.073	658.455	-748.829	-1063.32	-2452.65
923	7381.06	6710.16	9156.28	6719	7706.93	7166.83	8053.66	7072.65	5.34	71.167	135.093	199.238	43.723	37.828	41.008	45.879	-325.873	-456.672	1102.62	-353.649
924	8376.55	7794.82	6093.95	6277	7596.28	6446.91	7537.83	6404.12	5.185	71.078	134.812	199.028	43.889	37.738	40.795	45.85	780.271	1347.91	-1443.88	-127.124
925	6058.62	6933.27	5560.07	5541	7089.18	6949.3	7371.95	6582.88	4.992	70.998	135.088	198.997	44.031	37.914	40.912	45.689	-1030.55	-16.035	-1811.88	-1041.87
926	8591.88	7873.51	6800.36	6953	7815.39	7709.04	6720.19	6287.45	5.171	71.266	134.844	198.777	43.775	37.933	40.853	46.019	776.494	164.467	80.172	665.55
927	7100.34	6745.02	7878.95	5682	7776.55	6363.07	6230.78	6983.27	5.006	70.915	135.116	199.129	44.041	38.05	41.117	45.79	-676.211	381.947	1648.17	-1301.27
928	9087.94	7952.19	5702.8	5957	6071.67	7210.53	7319.4	6661.52	5.081	71.163	134.665	199.005	44.041	37.993	40.975	46.102	3016.26	741.658	-1616.6	-704.524
929	6493.8	7234.06	6410.12	7070	7115.56	7205.68	6194.38	6984.25	4.892	71.068	135.603	198.773	44.217	38.103	41.181	46.189	-621.758	28.386	215.741	85.75
930	8846.67	7615.54	6713.64	9057	7695.57	7389.22	7521.39	6818.5	4.709	71.215	135.083	199.225	44.349	37.969	40.954	46.01	1151.1	226.32	-807.745	2238.5
931	8373.17	8107.57	8222.22	5640	8311.87	6519.1	6967.68	6472.7	5.185	71.248	135.068	198.771	44.209	37.976	41.274	45.638	61.302	1588.47	1254.54	-832.699
932	7153.33	6375.5	6552.85	7763	7933.01	6177.91	6354.68	6181.5	5.268	71.193	134.971	199.137	43.69	38.116	40.958	46.12	-779.678	197.585	198.171	1581.5
933	6205.19	7033.86	6754.29	4342	8170.8	6688.72	6251.92	6659.9	5.052	70.913	134.878	199.368	44.121	37.681	40.856	46.082	-1965.61	345.144	502.371	-2317.9
934	7224.35	8076.69	7885.28	5667	7342.36	5827.02	5657.11	6805.82	4.961	70.979	134.83	199.006	44.055	38.122	41.071	45.883	-118.009	2249.68	2228.16	-1138.82
935	6306.65	4585.66	6198.73	4427	7391.46	7113.74	6404.58	6288.75	5.185	71.25	134.989	199.132	44.111	37.786	41	46.214	-1084.81	-2528.09	-205.848	-1861.75
936	7215.33	5678.29	7257.45	5043	6325.23	6869.99	7024.35	6872.45	5.044	71.016	134.852	198.795	43.89	37.851	41.133	45.604	890.107	-1191.71	233.107	-1829.45
937	11257	6579.68	6476.97	6236	7427.37	6211.26	5585.77	6167.85	4.92	71.226	134.935	198.848	43.984	38.023	41.048	46.107	3829.68	368.426	891.192	68.15
938	8206.31	5990.04	4499.55	7267	7518.24	6595.17	6632.7	6804.2	5.241	70.913	134.727	198.838	44.029	37.955	40.595	45.739	688.078	-605.128	-2133.15	462.8
939	6937.99	5228.09	6226.74	6981	8404.57	6130.65	6253.09	6220.18	4.733	71.404	134.979	199.057	44.036	38.084	41.113	45.972	-1466.57	-902.564	-26.354	760.825
940	8148.82	5148.41	6833.78	5716	6911.47	6938.3	6985.3	5727.48	4.913	70.834	134.757	198.79	43.84	37.846	40.993	46.174	1237.35	-1789.89	-151.512	-11.474
941	6376.55	5348.61	5590.79	6099	6731.2	6103.46	6449.8	6668.02	5.002	70.791	134.977	198.839	44.049	38.097	41.095	46.031	-354.65	-754.855	-859.01	-569.024
942	8337.09	6232.07	6990.06	5908	7404.28	6039.04	6758.36	6216.93	4.976	70.766	135.155	198.937	44.178	37.883	41.127	46.031	932.807	193.028	231.707	-308.924
943	8001.13	6108.57	6194.22	6482	7819.79	6030.63	7247.18	6075.55	5.128	71.384	134.78	199.11	43.769	37.851	41.264	46.189	181.342	77.938	-1052.96	406.45
944	6598.65	4882.47	5989.16	7806	7679.45	6831.15	6478.27	8343.08	4.97	71.237	135.168	199.05	44.163	38.125	41.039	45.871	-1080.81	-1948.68	-489.114	-537.074
945	8072.15	5763.94	6829.27	6472	7919.81	6600.35	6483.56	7103.85	5.184	71.092	135.025	199.002	43.959	37.789	40.847	46.133	152.339	-836.403	345.709	-631.849
946	8232.24	7946.22	5756.1	5029	7756.03	5659.98	6640.92	6942.98	4.738	71.119	135.096	199.152	44.137	37.958	40.929	45.974	476.212	2286.23	-884.823	-1913.97
947	8678.69	6903.39	6604.34	6748	7483.43	7049	6321.21	6329.38	4.87	71.431	135.064	198.977	43.891	37.819	40.956	45.928	1195.27	-145.617	283.13	418.625
948	7777.9	4961.15	7673.89	5429	6973.39	5206.15	6887.53	6361.55	5.067	71.18	134.843	199.185	44.221	38.169	41.071	45.993	804.51	-244.994	786.36	-932.549
949	8100.34	5469.12	6952.12	6436	6689.8	5935.78	6618.02	7001.15	5.212	70.748	135.274	198.749	43.867	37.973	41.011	45.934	1410.54	-466.657	334.101	-565.149
950	7181.51	6378.49	6942.19	5956	7871.08	7069.72	6025.86	6946.88	5.053	71.173	135.001	199.289	43.848	37.845	40.753	46.007	-689.571	-691.234	916.328	-990.874
951	7568.21	6077.69	7837.4	5474	7579.79	6669.62	7190.22	7157.48	5.135	71.163	134.916	198.913	44.157	37.927	41.224	45.723	-11.583	-591.931	647.177	-1683.47
952	9010.15	6428.29	5784.1	5774	8565.05	5979.48	7659.37	7217.27	4.979	71.232	135.019	199.207	43.978	37.859	40.795	46.279	445.096	448.805	-1875.27	-1443.27
953	8892.9	4819.72	6583.56	6551	7711.33	6957.07	6872.56	6764.23	4.888	70.997	135.231	199.117	44.121	38.026	41.07	45.999	1181.57	-2137.35	-289.001	-213.224
954	10146.6	5323.7	5532.97	6815	7925.68	6469.25	6851.42	6855.88	5.272	71.103	135.136	198.893	43.905	37.824	41.159	46.146	2220.89	-1145.54	-1318.45	-40.874
955	9000	6231.08	6876.24	5910	7572.83	6487.05	7000.86	6829.23	4.721	70.762	135.016	198.719	43.88	38.023	41.022	46.177	1427.17	-255.975	-124.615	-919.224
956	8193.91	5069.72	9288.17	5555	8015.81	4836.15	6593.95	7273.82	5.162	70.729	135.015	198.902	43.945	38.043	40.914	46.031	178.1	233.566	2694.22	-1718.82
957	7234.5	6661.35	6425.47	5450	8889.68	6670.27	7374.3	6649.18	5.299	71.111	134.788	199.17	43.877	37.968	40.865	45.984	-1655.18	-8.913	-948.825	-1199.17
958	8591.88	6031.87	8124.66	6702	8010.32	6939.59	6292.14	7227.02	4.885	70.856	135.174	199.08	44.075	38.055	41.089	45.866	581.567	-907.718	1832.52	-525.024
959	9118.38	6502.99	6208.67	7395	7754.57	7384.69	7068.09	7667.4	4.724	71.392	134.982	198.92	43.833	38.121	41.058	46.093	1363.81	-881.697	-859.416	-272.399
960	7958.29	7946.22	7952.12	4803	6553.49	6876.79	6123.33	7237.75	4.731	71.041	134.733	199.104	44.275	37.772	41.048	45.954	1404.79	1069.42	1828.79	-2434.75
961	8621.19	5513.94	6233.06	7999	7800.37	5866.19	6623.89	5763.23	5.243	71.422	134.945	198.907	43.966	38.012	40.886	46.087	820.829	-352.24	-390.83	2235.78
962	7799.32	7001	8558.27	5597	7686.05	5686.53	6606.57	6794.45	4.933	71.127	134.947	199.081	43.9	38.029	41.259	46.281	113.275	1314.47	1951.69	-1197.45
963	7895.15	6683.27	5409.21	4206	7136.44	8423.78	7110.95	6324.82	5.003	70.578	135.141	199.073	44.036	37.859	40.994	46.158	758.709	-1740.51	-1701.74	-2118.82
964	5683.2	6712.15	6591.69	6190	8423.99	6808.49	6773.03	5050.82	5.245	71.102	134.896	199.117	44.102	38.185	40.884	45.934	-2740.78	-96.339	-181.345	1139.17
965	7726.04	8630.48	7830.17	5246	8988.25	6399.98	6094.85	6821.43	5.092	71.223	135.163	198.954	44.349	37.807	41.196	45.923	-1262.2	2230.5	1735.32	-1575.42
966	6989.85	5065.74	6216.8	4967	9300.06	7249.7	6129.49	6746.35	4.787	71.025	135.083	199.115	43.682	38.1	41.42	45.673	-2310.2	-2183.96	87.308	-1779.35
967	6815.11	6083.66	7499.55	5833	6183.43	7443.92	6980.31	6205.55	5.209	71.046	134.982	199.248	43.757	38.102	41.039	46.085	631.68	-1360.26	519.241	-372.549
968	8207.44	6830.68	6923.22	5261	6634.47	6484.14	7124.16	6234.15	4.994	71.11	134.882	198.981	44.083	37.822	41.059	46.33	1572.97	346.539	-200.948	-973.149
969	6602.03	5473.11	7075.88	8908	6867.5	7584.41	6690.24	6153.55	4.825	71.307	134.93	199.228	44.018	37.936	40.916	45.972	-265.473	-2111.3	385.637	2754.45
970	6271.7	7566.73	6663.05	5246	7712.43	6212.55	6374.93	6752.52	5.091	71.352	134.89	199.192	44.016	37.941	41.142	45.834	-1440.73	1354.18	288.121	-1506.52
971	8063.13	4795.82	7011.74	6994	7585.65	6524.6	6741.03	6283.23	4.985	71.017	134.952	199.066	43.87	38.053	40.934	45.955	477.48	-1728.78	270.709	710.775
972	8181.51	7469.12	6546.52	6505	8037.06	5937.08	6148.28	6410.95	4.741	71.11	135.006	199.119	43.641	38.159	41.161	45.805	144.448	1532.05	398.238	94.05
973	7360.77	6234.06	6549.23	5871	8181.06	6574.78	6916.31	5931.25	4.904	71.005	135.244	199.015	44.074	37.737	40.935	45.817	-820.292	-340.711	-367.072	-60.249
974	10463.4	7082.67	7551.04	6385	6890.59	5989.19	6080.47	5985.85	5.215	70.868	134.691	199.102	43.774	37.94	41.15	45.959	3572.77	1093.48	1470.57	399.15
975	6942.5	5231.08	4804.88	7383	8321.39	6661.53	5804.79	6477.57	5.018	71.185	135.133	199.286	43.837	38.119	41.19	45.869	-1378.89	-1430.45	-999.909	905.425
976	7829.76	6447.21	8835.59	6547	6544.7	5622.76	6362.01	6493.18	4.814	70.965	135.011	199.016	43.801	38.243	40.8	45.977	1285.06	824.452	2473.58	53.825
977	8892.9	6716.14	4973.8	6714	8210.37	6014.77	6498.83	6124.62	4.992	71.079	134.637	199.272	44.296	38.018	40.973	45.974	682.525	701.37	-1525.02	589.375
978	6578.35	6368.53	7477.87	6248	7845.8	6950.27	5581.66	6829.55	4.947	71.232	135.268	198.986	43.995	38.006	40.879	46.006	-1267.44	-581.747	1896.21	-581.549
979	7177	7638.45	6233.06	5811	7586.39	6843.13	6773.62	6942.65	4.987	70.917	135.272	199.045	44	38.164	40.997	46.253	-409.385	795.319	-540.559	-1131.65
980	6790.3	8468.13	5457.09	6121	8034.13	5979.48	8677.53	6251.38	4.749	71.071	134.973	198.977	44.16	37.892	41.209	45.823	-1243.83	2488.64	-3220.44	-130.374
981	6369.79	7400.4	6457.99	6697	8881.26	6417.13	8374.25	6221.48	5.002	71.102	134.93	198.958	44.063	38.018	41.154	46.094	-2511.47	983.267	-1916.26	475.525
982	5266.06	6694.22	6585.37	5535	7781.68	5907.94	6327.66	6639.1	5.111	71.006	135.304	199.014	43.985	37.728	40.986	45.857	-2515.61	786.28	257.701	-1104.1
983	6686.58	6135.46	7328.82	7430	7027.26	6055.23	7424.8	5890.95	5.134	71.059	135.092	198.817	43.867	37.641	40.731	46.147	-340.67	80.229	-95.979	1539.05
984	5558.06	6224.1	5494.13	6432	6526.02	8072.88	6867.57	7288.12	5.267	71.082	135.085	199.21	43.871	38.047	41.094	46.171	-967.953	-1848.78	-1373.44	-856.124
985	6259.3	6545.82	7299.91	5256	7421.14	7002.07	7418.93	6206.85	4.945	71.145	134.995	198.846	43.933	38.073	40.832	45.999	-1161.84	-456.249	-119.014	-950.849
986	6927.85	5817.73	8148.15	6446	7672.49	6297.04	6083.11	6827.93	4.977	71.175	134.965	198.9	44.329	37.847	40.9	45.812	-744.644	-479.307	2065.04	-381.924
987	6767.76	5497.01	6637.76	6598	8248.48	6190.21	6813.26	6362.52	5.02	71.185	134.97	199.031	43.978	38.264	41.193	46.028	-1480.72	-693.201	-175.496	235.475
988	9846.67	7456.18	5283.65	7570	8348.14	6332.64	7874.28	7775.95	4.88	71.092	134.924	199.155	43.853	37.821	41.22	46.114	1498.53	1123.53	-2590.63	-205.949
989	9416.01	7251.99	7188.8	6575	7344.56	7118.92	6258.09	7092.48	5.023	71.029	134.962	199.214	44.034	37.978	40.906	45.935	2071.45	133.068	930.714	-517.474
990	7739.57	7062.75	8014.45	5242	8348.51	5897.26	6105.71	6398.27	4.881	71.055	135.066	198.671	43.734	37.957	40.914	46.169	-608.934	1165.49	1908.74	-1156.27
991	7144.31	5696.22	6586.27	6053	7895.27	7071.34	7524.03	6205.88	5.023	71.009	134.884	198.864	43.775	37.794	41.039	45.878	-750.957	-1375.12	-937.759	-152.874
992	6957.16	5366.53	7917.8	5921	6828.66	6599.05	7199.03	6642.68	5.226	71.094	134.96	198.92	43.936	38.056	40.78	45.652	128.495	-1232.52	718.767	-721.674
993	5808.34	6680.28	7654.02	5257	7058.4	6344.94	5866.73	6686.88	4.85	70.982	134.755	199.015	43.971	38.061	40.982	45.814	-1250.06	335.334	1787.29	-1429.87
994	6882.75	7152.39	5719.96	6831	8459.89	5302.94	6950.07	7228.98	4.791	71.282	134.993	198.898	43.935	38.249	41.107	45.713	-1577.14	1849.45	-1230.1	-397.974
995	7435.18	5895.42	7097.56	3858	6105.38	6397.06	6332.07	7944.62	5.048	70.858	134.932	198.951	43.992	38.006	40.931	46.042	1329.79	-501.642	765.492	-4086.62
996	7329.2	6550.8	6007.23	7109	9012.43	7944.7	6861.99	6470.75	5.151	70.808	134.899	198.823	44.003	38.149	41.108	46.177	-1683.23	-1393.9	-854.764	638.25
997	6873.73	6387.45	7652.21	5367	7553.41	6486.08	6165.31	6785.35	5.006	70.962	134.682	199.195	43.904	38.043	40.929	45.912	-679.678	-98.629	1486.9	-1418.35
998	7293.12	5539.84	6014.45	5708	7299.13	6762.2	6559.6	7328.1	4.823	70.997	134.989	198.786	43.971	37.815	41.174	45.879	-6.002	-1222.36	-545.144	-1620.1
999	6378.81	6879.48	6070.46	5853	8277.79	6027.07	6456.55	6583.85	5.005	71.094	135.007	199.003	44.29	38.056	41.033	46.076	-1898.98	852.415	-386.088	-730.849
1000	7564.82	6844.62	7180.67	5089	8680.47	5955.2	5776.9	6128.52	5.247	71.124	135.218	199.095	43.806	37.965	40.837	46.22	-1115.64	889.417	1403.77	-1039.52
1001	8465.61	8183.27	6423.67	6713	8329.09	7051.92	8144.38	6671.93	4.864	70.972	135.112	198.995	44.147	37.878	41.102	46.131	136.528	1131.35	-1720.71	41.075
1002	9019.17	6449.2	5783.2	6338	7481.96	6645.34	6413.98	7319.32	5.106	70.879	135.059	198.946	43.81	37.98	41.179	45.844	1537.2	-196.139	-630.78	-981.324
1003	6891.77	6927.29	7425.47	5608	7306.82	6029.98	6476.81	5349.82	5.084	70.92	135.087	199.034	44.108	37.829	40.806	46.159	-415.05	897.311	948.668	258.175
1004	7062.01	7825.7	7107.5	5187	7762.63	5969.45	6446.57	5828.88	4.894	71.242	135.104	199.198	44.067	37.838	40.856	46.117	-700.619	1856.25	660.93	-641.874
1005	6878.24	5198.21	7523.03	6188	6953.24	7266.86	5650.07	5963.75	4.834	70.905	134.983	199.241	43.922	38.059	41.163	45.978	-74.999	-2068.65	1872.97	224.25
1006	6869.22	4746.02	6813.01	6938	7540.95	6704.26	6885.48	7387.57	4.809	71.149	134.857	199.173	44.013	38.027	41.045	46.21	-671.73	-1958.24	-72.47	-449.574
1007	6512.97	6998.01	4263.78	5113	7972.21	7403.14	6037.6	7185.43	5.348	70.984	134.876	199.117	43.854	38.336	40.886	46.002	-1459.24	-405.128	-1773.83	-2072.42
1008	6745.21	5569.72	7495.94	6399	7425.17	6218.38	7194.62	6537.05	5.242	70.827	134.943	199.065	44.143	38.018	41.024	46.023	-679.96	-648.654	301.31	-138.049
1009	7227.73	6431.27	5921.41	6880	7512.74	6523.63	6538.75	7222.15	5.232	71.171	135.215	199.228	43.985	37.916	40.655	46.041	-285.005	-92.355	-617.343	-342.149
1010	6800.45	5881.47	5391.15	7398	7462.91	6309.98	7004.09	7311.85	5.03	71.096	135.022	199.156	43.983	38.09	40.929	46.043	-662.457	-428.51	-1612.94	86.15
1011	8126.27	7535.86	7177.96	5580	7252.59	5962.97	5939.84	6326.77	5.077	70.831	134.927	199.132	44.04	37.959	40.951	45.824	873.675	1572.88	1238.12	-746.774
1012	7909.81	6438.25	6740.74	7038	7732.95	6386.7	5936.9	5949.45	5.137	70.993	135.162	198.974	43.925	38.181	41.06	46.16	176.86	51.544	803.839	1088.55
1013	8280.72	6863.55	6861.79	6743	7623.03	5175.72	6706.39	7275.77	5.117	71.214	134.924	198.878	44.091	37.923	40.856	46.114	657.694	1687.82	155.397	-532.774
1014	5923.34	4958.17	7077.69	5841	8504.96	5759.36	7240.43	6255.93	5.216	71.245	134.947	199.011	43.757	38.013	40.865	45.787	-2581.62	-801.194	-162.736	-414.924
1015	7500.56	6426.3	4417.34	10658	8157.24	6985.88	7073.67	5526.62	5.228	71.183	135.012	198.997	43.659	38.078	41.445	45.936	-656.679	-559.586	-2656.32	5131.38
1016	8228.86	5862.55	6294.49	4879	7394.02	6541.76	6865.52	6412.57	5.333	71.222	134.783	198.997	44.173	38.125	41.148	46.067	834.837	-679.207	-571.024	-1533.57
1017	5669.67	7024.9	6183.38	6551	7989.06	6550.82	6603.64	5792.15	5.055	70.962	135.113	198.91	43.697	38.013	40.995	46.026	-2319.39	474.079	-420.256	758.85
1018	7395.72	7035.86	5349.59	7215	7808.43	5998.58	6936.27	7085.98	5.149	71.338	135.126	199.188	43.992	38.174	41.22	46.026	-412.71	1037.28	-1586.67	129.025
1019	9375.42	9754.98	6905.15	5636	6492.67	7074.25	7770.05	6769.75	4.863	71.214	135.009	199.246	44.273	37.811	41.124	46.165	2882.75	2680.73	-864.904	-1133.75
1020	6696.73	6074.7	7984.64	6794	6963.13	6923.41	7681.69	6190.27	4.736	71.241	135.188	199.148	43.78	37.965	41.119	45.797	-266.403	-848.704	302.958	603.725
1021	8922.21	6243.03	5747.06	5344	7617.53	7270.42	6667.64	7200.38	4.831	71.155	134.752	199.308	44.044	37.969	41.084	45.801	1304.68	-1027.39	-920.573	-1856.37
1022	8280.72	7045.82	6284.55	5122	7767.02	6893.62	5721.7	6433.7	5.418	70.982	135.079	198.718	44.12	38.285	40.961	45.701	513.698	152.191	562.85	-1311.7
1023	7151.07	6454.18	8050.59	7324	10662.3	7447.81	6670.87	5791.18	4.941	71.095	134.863	199.148	44.176	37.779	40.882	46.165	-3511.27	-993.624	1379.72	1532.83
1024	8024.8	6065.74	7930.44	6109	7295.1	6143.6	7059.57	6556.55	5.267	71.04	135.211	198.775	44.098	38.181	41.147	46.084	729.707	-77.863	870.867	-447.549
1025	7875.99	5939.24	6862.69	5210	8410.43	6498.38	7701.06	7433.4	4.77	70.978	135.031	199.192	44.216	37.788	41.058	46.214	-534.441	-559.137	-838.368	-2223.4
1026	9012.4	5288.85	6291.78	5424	6191.12	8567.18	6334.12	6073.93	4.855	71.126	135.174	198.647	43.997	37.917	41.089	45.957	2821.28	-3278.34	-42.343	-649.924
1027	7358.51	5008.96	7362.24	5471	7730.02	6094.07	6457.43	6927.05	5.134	71.232	135.267	199.046	43.86	38.28	40.945	45.876	-371.504	-1085.11	904.81	-1456.05
1028	7634.72	5436.26	5205.06	5587	8868.8	6077.24	8146.14	8340.8	4.84	71.342	134.952	199.263	44.088	38.039	41.005	45.803	-1234.08	-640.985	-2941.08	-2753.8
1029	5688.84	5011.95	5673.89	6632	7026.52	6050.05	6028.21	6839.95	4.63	70.997	135.126	198.873	44.109	38.154	40.805	45.719	-1337.68	-1038.1	-354.312	-207.949
1030	7111.61	6856.57	8214.09	4868	7794.5	6105.73	6371.7	5680.68	5.116	70.927	135.187	199.035	44.02	38.079	40.952	46.291	-682.891	750.847	1842.39	-812.674
1031	8943.63	5560.76	7107.5	6181	9198.93	6418.43	6946.55	4906.2	4.666	71.135	135.238	199.331	44.138	37.866	40.757	46.146	-255.298	-857.668	160.953	1274.8
1032	7339.35	5650.4	5614.27	5891	8377.82	6333.62	6704.04	5590	5.14	71.124	134.808	199.127	43.84	38.008	41.005	46.187	-1038.47	-683.216	-1089.77	301
1033	8461.1	4700.2	4922.31	6069	6688.33	7051.92	7324.1	6506.18	4.536	71.339	135.144	199.051	43.828	37.931	40.695	46.002	1772.77	-2351.72	-2401.78	-437.174
1034	7164.6	5715.14	5890.7	8583	7602.88	6312.25	7325.56	7521.15	5.174	71.058	134.844	198.856	44.02	38.081	41.325	45.951	-438.274	-597.111	-1434.87	1061.85
1035	6812.85	7268.92	5527.55	9169	7396.96	7967.68	6758.65	6357.32	5.215	70.776	134.875	198.989	44.064	37.905	40.878	45.965	-584.103	-698.754	-1231.1	2811.68
1036	7356.26	6154.38	6028	5261	7291.06	6669.3	6500.88	6473.68	5.169	71.288	135.096	199.304	43.932	37.888	41.117	45.93	65.192	-514.914	-472.876	-1212.67
1037	8268.32	5820.72	6452.57	7091	6883.62	7264.91	5946.3	6803.55	4.948	71.067	134.751	198.994	44.223	37.901	41.116	46.233	1384.7	-1444.2	506.278	287.45
1038	8896.28	8209.16	5828.36	6580	5780.75	6988.8	6231.96	7049.9	4.789	70.895	134.945	198.997	44.166	37.925	40.781	45.917	3115.53	1220.37	-403.59	-469.899
1039	9039.46	4921.31	5288.17	7244	7250.4	6654.08	6898.69	6853.93	4.785	70.879	134.737	198.957	44.059	38.112	40.963	46.023	1789.06	-1732.77	-1610.52	390.075
1040	7655.02	6057.77	6558.27	6711	7094.31	7081.7	6073.13	6573.45	4.987	71.115	134.938	198.992	44.266	38.1	40.962	46.025	560.71	-1023.93	485.14	137.55
1041	10196.2	5576.69	3821.14	4802	7466.57	5756.12	6644.44	6487.32	5.269	71.219	135.066	199.05	44.16	38.138	40.966	45.857	2729.59	-179.431	-2823.3	-1685.32
1042	8403.61	5775.9	7427.28	4705	8259.47	7025.7	6642.1	6997.9	4.893	71.372	135.177	199.034	43.827	37.905	41.257	46.078	144.138	-1249.8	785.185	-2292.9
1043	8072.15	8649.4	6648.6	5476	7378.64	7245.49	6473.58	6853.93	5.178	70.968	134.793	199.005	43.747	38.005	41.012	46.04	693.517	1403.91	175.023	-1377.92
1044	6153.33	4876.49	6410.12	5284	6614.32	6679.01	6121.86	5339.75	4.845	71.055	135.115	198.768	44.101	38.042	41.295	46.037	-460.991	-1802.51	288.257	-55.749
1045	6636.98	5594.62	5997.29	6192	6943.72	7082.35	7255.69	7423.65	5.018	71.121	135.078	199.139	43.735	37.903	40.941	46.146	-306.735	-1487.72	-1258.4	-1231.65
1046	6467.87	5586.65	5333.33	5907	7985.4	8721.91	7098.33	6628.38	5.133	71.055	135.032	199.262	43.866	37.77	40.781	45.655	-1517.53	-3135.26	-1764.99	-721.374
1047	6090.19	5955.18	6587.17	5011	6845.89	7333.54	6369.35	7481.18	5.075	71.182	135.118	198.965	44.061	38.067	41.047	45.956	-755.692	-1378.36	217.818	-2470.17
1048	6871.48	5990.04	6414.63	5911	8919	7251.32	7301.78	6519.82	5.051	71.034	134.979	199.082	43.599	37.807	40.768	46.328	-2047.52	-1261.28	-887.149	-608.824
1049	7726.04	6157.37	5500.45	8438	7492.59	6372.46	6733.69	6905.93	5.232	71.199	134.625	198.901	43.743	37.973	41.237	45.81	233.455	-215.089	-1233.24	1532.08
1050	6821.87	7248.01	6697.38	7024	7310.12	5816.34	6547.56	6780.8	5.021	71.067	134.898	199.193	43.832	37.685	40.81	46.034	-488.246	1431.67	149.819	243.2
1051	7660.65	6761.95	5073.17	5029	7458.15	7178.49	6406.05	7826	5.069	70.97	135.03	199.162	43.962	37.637	41.124	45.97	202.508	-416.533	-1332.88	-2797
1052	4792.56	4750	4447.15	5929	7455.21	6118.35	5692.34	6803.88	4.979	70.868	135.093	199.067	43.981	38.264	41.122	45.787	-2662.65	-1368.35	-1245.19	-874.874
1053	6687.71	8793.83	7196.02	7152	6721.31	6645.99	7348.46	6114.55	5.145	70.963	135.061	199.034	44.359	37.903	40.946	46.16	-33.595	2147.83	-152.438	1037.45
1054	8650.51	6954.18	7743.45	5898	7558.17	6144.25	7259.21	5472.68	5.331	71.129	134.905	199.125	43.778	37.867	40.878	45.822	1092.33	809.935	484.237	425.325
1055	6750.85	6032.87	6364.95	4981	7854.96	6472.48	6958.88	6481.15	5.016	70.802	134.974	198.96	43.904	38.172	41.165	45.911	-1104.11	-439.616	-593.924	-1500.15
1056	7810.6	4604.58	5365.85	5522	8430.21	6985.56	6559.6	6471.07	5.316	71.217	134.856	199.008	43.878	38.146	41.198	45.879	-619.616	-2380.97	-1193.74	-949.074
1057	6801.58	7473.11	5604.34	8720	6960.57	6949.95	6575.16	6994	5.111	71.097	134.77	199.018	43.867	37.944	41.002	46.377	-158.99	523.157	-970.821	1726
1058	6604.28	6772.91	8847.33	5412	7128.75	5371.89	6597.47	6432.07	5.244	71.085	134.848	199.091	44.202	38.057	41.134	46.091	-524.463	1401.02	2249.86	-1020.07
1059	5813.98	7048.81	6787.72	6014	7153.66	7780.25	6858.18	5482.75	4.814	71.048	134.897	198.875	43.972	38.272	40.738	45.972	-1339.68	-731.448	-70.46	531.25
1060	8962.8	6157.37	6439.93	6064	9366.38	5477.74	6960.34	5696.27	5.134	71.284	134.831	198.849	43.977	37.76	41.082	46.197	-403.578	679.631	-520.415	367.725
1061	7859.08	7310.76	6662.15	6484	7258.45	6225.5	6945.08	6585.15	4.532	71.186	135.197	199.116	43.852	38.269	41.162	46.065	600.62	1085.26	-282.926	-101.149
1062	7450.96	4652.39	6497.74	5595	8843.52	6329.08	6036.72	6576.7	4.934	71.232	135.189	198.808	44.35	38.135	41.284	46.044	-1392.56	-1676.69	461.021	-981.699
1063	6932.36	5533.86	6911.47	6595	7298.03	7383.72	6498.24	6523.73	4.875	70.963	135.186	199.032	44.266	38.062	41.013	45.916	-365.67	-1849.85	413.234	71.275
1064	8417.14	8157.37	6494.13	7061	7395.49	6527.52	6290.38	7333.95	5.118	70.856	134.89	199.061	43.986	37.865	40.976	46.045	1021.65	1629.86	203.749	-272.949
1065	5403.61	6462.15	7127.37	6293	7659.67	5691.71	6589.54	5054.4	5.026	71.051	135.1	199.039	43.924	38.072	41.063	46.263	-2256.06	770.443	537.827	1238.6
1066	6732.81	5345.62	7236.68	4605	7550.85	5963.62	6984.42	6237.73	5.236	71.028	135.076	199.146	43.822	37.947	41.101	46.025	-818.037	-618.002	252.258	-1632.72
1067	6768.88	5736.06	6455.28	6102	8055.38	6454.36	7092.75	6194.82	5.299	71.142	134.828	198.838	44.133	38.166	41.216	46.108	-1286.5	-718.301	-637.465	-92.824
1068	7456.6	6037.85	6727.19	6120	7698.51	6468.6	6133.9	6681.02	5.122	70.915	135.164	199.21	44.109	37.968	41.051	46.324	-241.91	-430.751	593.293	-561.024
1069	9037.2	7440.24	6409.21	6275	7523.36	6243.95	5685.3	6369.02	4.983	71.009	134.584	198.744	44.014	37.943	41.154	45.825	1513.84	1196.29	723.916	-94.024
1070	6588.5	5212.15	7269.2	6180	7086.98	5973.65	5941.6	6225.38	4.985	71.122	134.971	198.909	44.28	38.065	41.05	46.272	-498.477	-761.503	1327.6	-45.374
1071	7413.75	5656.38	7130.08	6800	7583.45	7175.9	7465.02	6795.43	5.05	71.088	135.016	199.053	44.011	37.908	40.753	45.939	-169.7	-1519.52	-334.936	4.575
1072	7172.49	6680.28	5816.62	6060	7643.91	6106.05	5663.87	6337.5	5.128	70.979	135.015	199.106	44.168	38.155	40.926	45.992	-471.42	574.228	152.755	-277.499
1073	10348.4	7562.75	8379.4	8471	8711.25	6189.24	6726.06	5829.2	4.943	71.468	135.094	198.823	43.974	38.128	41.192	46.05	1637.12	1373.51	1653.34	2641.8
1074	7790.3	5687.25	7635.05	4648	7624.13	6804.28	5774.84	6331.32	4.891	70.865	134.969	198.815	43.927	38.105	40.856	46.15	166.178	-1117.03	1860.21	-1683.32
1075	6144.31	8136.45	7393.86	7642	8067.48	5858.09	7939.75	6954.02	4.884	70.739	135.069	198.814	43.971	37.732	41.177	45.799	-1923.17	2278.36	-545.889	687.975
1076	7129.65	6409.36	7723.58	5520	6479.48	5991.78	7430.08	6414.52	5.226	71.077	134.798	199.181	44.035	37.655	40.844	45.899	650.169	417.58	293.496	-894.524
1077	7402.48	6511.95	9588.98	7118	6767.11	6911.11	5854.11	8521.17	4.847	71.011	135.055	198.968	43.935	37.806	41.057	46.065	635.372	-399.152	3734.87	-1403.17
1078	5879.37	7714.14	6030.71	5756	9010.6	6807.52	7267.14	7053.48	4.875	70.897	135.239	198.953	43.909	38.224	41.242	46.024	-3131.23	906.624	-1236.43	-1297.47
1079	7978.58	6477.09	7247.52	6303	7784.61	6455.33	6804.15	6601.07	4.648	71.088	135.028	198.959	43.89	37.973	40.964	46.161	193.968	21.763	443.36	-298.074
1080	8307.78	6377.49	5863.6	5977	7341.63	6309.34	6970.32	6680.05	5.034	71.337	135.146	198.791	44.24	37.637	41.036	45.783	966.15	68.152	-1106.73	-703.049
1081	7623.45	4395.42	5102.98	5673	8011.05	5252.44	6740.74	6230.57	5.046	71.143	135.133	198.556	44.235	37.507	40.952	46.09	-387.598	-857.021	-1637.76	-557.574
1082	6472.38	5716.14	5498.65	6670	8191.69	7336.78	6160.91	6023.88	5.033	71.114	134.887	198.879	43.938	37.994	40.946	45.92	-1719.31	-1620.64	-662.262	646.125
1083	6219.84	5202.19	6202.35	7453	7084.05	5680.06	6365.54	5762.57	5.044	70.913	134.82	199.072	44.103	37.701	40.858	45.864	-864.204	-477.863	-163.188	1690.42
1084	8595.26	6501	7664.86	5245	7912.12	6529.78	5859.69	6452.23	4.92	71.08	135.192	198.901	43.888	38.369	40.99	45.919	683.145	-28.784	1805.17	-1207.22
1085	6052.99	7245.02	5864.5	6291	7353.35	7430.33	7631.19	7002.12	5.337	71.454	135.074	198.961	44.247	38.405	41.003	46.141	-1300.37	-185.308	-1766.69	-711.124
1086	9237.88	4466.14	6822.94	7318	9408.15	5932.22	8130.58	6158.43	4.944	71.335	135.106	199.05	43.888	38.117	41.122	45.927	-170.264	-1466.09	-1307.63	1159.58
1087	6800.45	5525.9	6270.1	6198	8940.25	6788.1	6609.8	5605.93	5.124	70.942	135.153	199.292	43.839	38.136	40.945	45.704	-2139.8	-1262.2	-339.701	592.075
1088	9284.1	7323.7	8258.36	6359	6873.36	6116.41	7295.03	6682.65	5.012	71.054	135.076	198.754	44.062	38.118	40.674	45.974	2410.74	1207.3	963.324	-323.649
1089	7934.61	5136.45	5102.08	7435	8042.56	6981.67	6992.05	7471.43	5.046	70.811	135.226	198.964	44.111	38.201	40.961	46.056	-107.947	-1845.22	-1889.97	-36.424
1090	5540.02	5287.85	5704.61	6778	8530.24	7016.96	6724.3	7551.38	4.801	71.254	134.918	199.021	44.104	37.987	40.824	46.153	-2990.22	-1729.11	-1019.69	-773.374
1091	8744.08	7961.15	7153.57	5510	8207.07	5960.71	6195.26	7220.52	5.342	70.861	134.838	198.996	43.924	38.178	41.033	45.715	537.007	2000.45	958.311	-1710.52
1092	7171.36	6529.88	7629.63	6732	7411.61	6252.69	6480.92	7185.43	5.066	71.104	134.848	198.899	43.701	38.057	40.961	46.056	-240.247	277.191	1148.71	-453.424
1093	6448.7	7468.13	7843.72	5683	8843.88	5871.69	5667.98	6777.23	5.304	71.032	134.97	199.171	43.921	37.811	40.966	46.083	-2395.18	1596.44	2175.74	-1094.22
1094	6474.63	6363.55	7010.84	7063	7852.03	6493.53	7148.24	7049.57	4.93	70.989	135.075	199.176	43.813	38.012	41.254	45.812	-1377.39	-129.979	-137.397	13.425
1095	7232.24	6227.09	5300.81	6883	7443.86	6733.72	7048.42	6362.85	5.076	71.025	135.18	199.134	44.119	37.983	40.731	45.816	-211.611	-506.623	-1747.61	520.15
1096	9797.07	6540.84	5439.02	6533	6757.58	7025.7	5777.19	5985.85	5.22	70.792	134.997	198.918	44.047	37.861	41.201	45.741	3039.49	-484.86	-338.165	547.15
1097	6974.07	6351.59	6028	6819	8098.98	5802.09	6428.36	7174.38	5.407	71.113	135.135	199.16	44.129	38.199	41.305	45.875	-1124.91	549.502	-400.36	-355.374
1098	8457.72	4772.91	5425.47	6557	6910.01	6652.47	7873.4	8078.52	4.89	70.811	134.974	199.071	43.905	37.605	40.728	46.004	1547.72	-1879.56	-2447.92	-1521.52
1099	7908.68	6858.57	8142.73	7045	8434.98	6472.16	5860.28	6498.05	4.675	71.159	134.949	198.99	44.093	38.163	40.907	45.985	-526.296	386.404	2282.45	546.95
1100	7391.21	6701.19	7131.89	6400	8640.9	5510.11	6384.03	6582.55	4.928	70.936	135.162	199.16	44.348	37.923	40.99	45.713	-1249.69	1191.09	747.855	-182.549
1101	6685.46	5186.26	7651.31	7774	8152.85	6277.61	7032.56	6254.3	5.012	70.755	135.119	198.9	44.036	38.076	40.978	45.939	-1467.39	-1091.36	618.744	1519.7
1102	6562.57	5542.83	7615.18	4756	8804.31	5871.04	6467.12	6060.27	5.264	71.094	135.167	198.996	43.957	37.755	41.007	46.158	-2241.74	-328.211	1148.06	-1304.27
1103	8577.23	6996.02	6053.3	5116	7640.25	5936.11	8279.13	5223.73	5.218	71.037	135.102	198.816	43.943	37.942	41.023	45.833	936.979	1059.91	-2225.84	-107.724
1104	5703.49	7843.62	6662.15	5763	8350.7	7144.17	7470.89	6102.85	5.155	71.102	135.23	199.123	44.179	38.194	41.11	45.731	-2647.21	699.452	-808.739	-339.849
1105	5978.58	6195.22	5028	6099	6690.16	7039.94	6790.06	7333.95	5.33	71.069	134.842	199.01	44.056	37.971	41.164	45.896	-711.583	-844.72	-1762.06	-1234.95
1106	6171.36	5777.89	6019.87	6114	7955.72	6354.01	7465.9	5681.32	5.014	71.235	134.793	199.081	43.89	38.33	40.967	46.006	-1784.36	-576.12	-1446.02	432.675
1107	8031.57	4920.32	5618.79	7511	7622.66	6772.24	6117.75	6310.2	5.106	71.037	135.037	198.776	43.813	38.178	40.88	45.763	408.906	-1851.92	-498.96	1200.8
1108	6126.27	5589.64	7284.55	7167	8668.38	7355.23	7164.09	6230.57	5.121	71.066	135.187	199.149	44.01	37.898	41.174	46.256	-2542.11	-1765.59	120.461	936.425
1109	8324.69	6096.61	7147.24	8402	8885.29	7964.12	6527.3	6835.73	5.035	71.024	134.803	199.228	43.835	37.907	40.955	45.975	-560.597	-1867.5	619.941	1566.28
1110	7464.49	5471.12	5608.85	6591	7461.81	6629.48	6108.36	6285.82	5.207	71.252	134.785	198.869	43.721	37.998	40.955	46.08	2.678	-1158.37	-499.502	305.175
1111	7845.55	6506.97	7644.99	7438	7667.36	6382.17	5741.37	7042.1	5.03	71.307	134.973	198.987	43.963	37.949	41.047	45.631	178.185	124.801	1903.61	395.9
1112	6210.82	6003.98	5060.52	7354	6830.86	6881	7610.05	6568.57	5.15	71.065	134.876	198.799	44.154	38.014	40.782	45.829	-620.038	-877.016	-2549.53	785.425
1113	6987.6	6625.5	7679.31	6568	7018.83	7304.08	7259.8	6250.73	4.897	71.281	134.785	198.908	43.781	38.042	40.672	45.739	-31.228	-678.585	419.512	317.275
1114	6589.63	7018.92	6188.8	5645	7399.15	5975.92	6650.32	6124.95	4.879	70.814	134.831	198.855	44.192	38.071	40.888	45.859	-809.525	1043	-461.517	-479.949
1115	6659.53	6890.44	7454.38	6159	7696.67	7819.75	7302.96	6066.12	4.829	71.17	135.199	198.828	43.867	38.167	41.144	46.081	-1037.15	-929.307	151.423	92.875
1116	7436.3	5970.12	5201.44	4360	7247.46	6836.98	7740.11	6098.95	4.901	70.931	135.121	199.169	43.997	38.045	41.198	46.034	188.839	-866.857	-2538.66	-1738.95
1117	9394.59	7333.66	6559.17	5446	8046.22	6446.91	6923.94	6177.93	4.768	70.902	134.969	198.835	44.004	38.087	40.782	45.756	1348.37	886.753	-364.769	-731.924
1118	8578.35	5928.29	6204.15	6125	7706.93	6942.18	7143.54	6762.6	5.011	71.207	135	199.287	44.281	37.906	41.467	46.081	871.421	-1013.89	-939.385	-637.599
1119	8941.38	4768.92	9046.97	5179	7972.21	6924.05	7229.27	7641.73	5.037	70.907	134.751	198.909	43.77	37.977	41.014	46.03	969.166	-2155.13	1817.71	-2462.72
1120	9301.01	6277.89	5855.47	6782	7757.13	7310.56	5983.29	7127.9	5.157	71.434	135.067	198.986	44.113	37.999	40.925	45.899	1543.88	-1032.67	-127.822	-345.899
1121	8732.81	6003.98	6019.87	6334	8374.89	7102.09	6295.08	6503.25	4.972	70.821	135.015	198.895	44.004	37.965	40.968	46.058	357.92	-1098.11	-275.202	-169.249
1122	7264.94	6735.06	8056.91	5953	7813.92	6450.47	7065.74	6154.85	5.207	71.069	135.455	199.141	43.996	37.691	41.011	45.817	-548.984	284.587	991.17	-201.849
1123	6951.52	4215.14	6335.14	5386	7809.16	6950.92	7303.55	6860.75	5.17	70.832	134.679	199.029	44.038	37.851	40.837	46.257	-857.637	-2735.78	-968.405	-1474.75
1124	8021.42	5810.76	6894.31	6925	7643.18	7693.5	6619.2	6284.85	4.962	71.097	135.2	199.092	43.998	37.901	40.596	46.16	378.241	-1882.74	275.113	640.15
1125	7602.03	6740.04	8230.35	4868	7349.32	6831.47	7413.05	6998.88	5.103	71.294	135.569	199.481	43.964	37.828	41.014	45.986	252.706	-91.433	817.299	-2130.87
1126	7563.7	5948.21	7384.82	8214	8415.92	6074.33	6893.99	6408.02	4.943	70.707	135.165	199.114	44.066	37.611	41.037	46.034	-852.226	-126.12	490.831	1805.97
1127	7800.45	6035.86	5872.63	4848	8505.69	6852.84	6321.5	6574.43	4.742	71.151	134.737	199.144	43.743	38.108	40.9	46.028	-705.241	-816.981	-448.87	-1726.42
1128	9459.98	6551.79	5666.67	5393	8073.7	6704.9	6942.14	6448.65	5.237	70.949	135.051	198.945	44.144	37.918	40.876	46.292	1386.27	-153.112	-1275.47	-1055.65
1129	6821.87	5973.11	6436.31	6516	7481.6	6381.85	7431.55	6762.93	5.151	71.331	135.032	199.189	43.667	38.158	40.854	46.153	-659.723	-408.739	-995.234	-246.924
1130	7540.02	5414.34	5026.2	5465	6556.79	5751.92	6342.34	6214	5.02	70.833	134.765	199.089	43.844	38.139	40.766	46.076	983.23	-337.574	-1316.15	-748.999
1131	7643.74	7286.85	6878.95	7200	6913.67	6299.95	6271	6945.25	5.238	71.028	135.19	199.003	44.252	38.13	40.849	46.011	730.073	986.902	607.949	254.75
1132	6746.34	4840.64	5240.29	5511	7960.48	7147.73	7343.18	6641.05	5.032	70.859	134.926	199.029	43.987	38.069	40.948	45.878	-1214.15	-2307.1	-2102.89	-1130.05
1133	6695.6	5782.87	7092.14	7084	8502.76	6634.98	7297.67	6439.88	4.946	70.7	134.772	198.869	44.153	38.167	41.015	46.22	-1807.16	-852.116	-205.532	644.125
1134	7809.47	6280.88	9378.5	6432	7170.52	7481.8	8858.38	6486.35	5.024	71.142	134.922	198.933	43.733	38.156	41.344	46.529	638.952	-1200.92	520.122	-54.349
1135	6213.08	5860.56	6515.81	5190	7685.68	6509.39	7646.16	7951.77	4.875	71.091	135.026	198.89	44.002	37.767	41.035	45.729	-1472.6	-648.829	-1130.35	-2761.77
1136	6823	8067.73	7329.72	5159	7899.66	6500	7455.04	6664.45	5.199	70.999	135.148	199.136	44.021	37.825	41.192	46.188	-1076.66	1567.73	-125.315	-1505.45
1137	7156.71	5874.5	6302.62	6150	7591.88	7730.4	6807.97	6755.77	4.921	71.096	135.229	198.991	43.984	37.567	41.23	45.804	-435.174	-1855.9	-505.351	-605.774
1138	7588.5	7798.81	6063.23	5398	7299.86	6001.82	6858.47	7846.48	4.949	71.013	134.914	198.828	43.955	37.987	41.171	46.143	288.641	1796.99	-795.234	-2448.47
1139	6926.72	7645.42	6775.97	8265	8233.82	6241.04	7586.56	5451.55	4.822	71.188	135.004	198.986	43.795	38.372	40.956	45.892	-1307.1	1404.38	-810.591	2813.45
1140	8369.79	7084.66	6370.37	6657	9026.72	7149.35	5630.4	6519.18	5.083	70.958	134.886	198.992	44.041	38.006	41.21	45.999	-656.932	-64.69	739.973	137.825
1141	8091.32	6071.71	6409.21	5885	7499.55	7105.33	7527.85	7865.98	5.144	71.041	135.208	198.94	44.258	38.056	41.074	46.101	591.77	-1033.62	-1118.63	-1980.97
1142	8708	7165.34	6982.84	7406	6512.82	6656.35	6779.2	7619.95	5.065	70.99	134.9	199.194	43.55	37.988	41.035	46.267	2195.18	508.989	203.636	-213.949
1143	6009.02	3710.16	5817.52	6413	8103.02	6382.17	6906.91	7568.93	5.224	70.961	135.063	198.9	44.13	38.155	40.769	46.045	-2094	-2672.01	-1089.38	-1155.92
1144	7341.6	6164.34	7708.22	3937	8462.09	5046.56	5748.13	6618.3	4.962	70.938	135.073	199.218	43.803	37.985	41.221	45.946	-1120.49	1117.78	1960.1	-2681.3
1145	6715.9	7175.3	5055.1	7469	9078.75	6423.28	6496.77	5363.48	4.804	71.188	134.982	198.931	44.103	37.95	40.871	45.96	-2362.85	752.017	-1441.67	2105.53
1146	7263.81	6649.4	5261.07	8143	8053.55	7307	5369.99	6917.95	5.089	71.338	134.929	198.984	44.201	38.099	40.939	46.049	-789.74	-657.594	-108.92	1225.05
1147	6864.71	7538.85	6261.97	6097	7096.51	6328.44	6491.78	7969	5.024	71.007	135.157	198.914	43.986	37.846	40.881	46.144	-231.792	1210.41	-229.809	-1872
1148	8399.1	7709.16	5068.65	6964	7662.97	7352.96	5468.63	8259.55	5.052	71.143	135.043	198.932	43.971	37.763	41.013	46.169	736.133	356.2	-399.976	-1295.55
1149	9202.93	6236.06	6986.45	5812	7185.54	7054.18	6231.07	6812	4.832	71.307	135.109	198.903	44.007	37.909	41.454	46.027	2017.39	-818.126	755.375	-999.999
1150	8794.81	7832.67	6383.92	5792	7654.54	7042.53	6638.57	6487	5.036	70.864	134.796	198.989	44.107	38.058	40.941	45.994	1140.28	790.139	-254.651	-694.999
1151	7872.6	5401.39	7302.62	7364	7755.3	6165.61	6925.11	6149.32	5.125	71.024	134.965	199.17	44.17	37.587	41.058	45.974	117.306	-764.217	377.507	1214.67
1152	5549.04	6381.47	5865.4	6302	7318.91	6928.91	7890.13	6944.27	4.889	71.226	134.803	199.15	44.052	38.12	40.987	45.888	-1769.87	-547.434	-2024.73	-642.274
1153	8933.48	6068.73	6515.81	6145	7021.76	6389.29	6838.8	5933.2	4.988	71.091	134.745	199.19	44.292	37.903	40.699	46.256	1911.72	-320.567	-322.989	211.8
1154	6585.12	5543.82	6843.72	6561	9034.78	7092.7	7556.03	7236.12	4.935	71.164	135.264	198.824	43.74	37.839	40.759	45.719	-2449.66	-1548.88	-712.307	-675.124
1155	6732.81	6038.85	7186.09	6203	8632.83	6799.75	7300.9	5802.88	5.071	70.986	135.256	198.993	44.036	37.886	40.933	45.776	-1900.03	-760.905	-114.814	400.125
1156	6708.01	5070.72	5954.83	5521	7524.46	5693.65	7698.42	5180.18	4.836	71.033	135.029	199.155	44.241	37.685	41.104	46.072	-816.459	-622.932	-1743.59	340.825
1157	7302.14	7226.1	6239.39	7946	8180.69	6525.25	6106.3	6732.38	4.967	71.057	135.237	198.952	43.994	38.158	41.239	45.948	-878.55	700.847	133.085	1213.62
1158	8161.22	7160.36	7426.38	6099	9001.8	7026.67	7610.34	6801.6	4.965	71.005	135.158	199.012	43.918	37.972	40.885	46.028	-840.585	133.69	-183.965	-702.599
1159	6427.28	7310.76	7078.59	8065	7925.68	7416.41	6857.29	7106.77	4.957	71.042	135.132	199.044	43.925	37.65	41.103	46.197	-1498.39	-105.651	221.296	958.225
1160	11270.6	5645.42	7094.85	5401	8127.56	6812.05	6264.54	7389.52	5.019	71.232	135.002	199.362	43.909	38.015	40.755	46.179	3143.01	-1166.63	830.307	-1988.52
1161	7257.05	5318.73	6664.86	5990	7485.99	7226.72	6394.02	6155.5	5.304	71.035	135.025	199.127	43.796	38.217	41.223	46.101	-228.945	-1907.99	270.845	-165.499
1162	6307.78	5265.94	6614.27	4894	9036.25	6034.19	7238.08	6445.07	5.117	71.018	135.215	199.354	44.176	37.805	40.909	46.232	-2728.47	-768.251	-623.802	-1551.07
1163	9859.08	6037.85	5135.5	8076	7766.29	5626.32	6268.07	6836.7	5.058	70.951	134.951	198.924	44.173	38.085	40.806	45.997	2092.78	411.529	-1132.56	1239.3
1164	8461.1	5019.92	7380.31	6483	7922.01	6559.24	7158.81	6563.05	4.794	70.821	134.981	199.003	43.866	38.088	40.801	45.714	539.092	-1539.32	221.5	-80.049
1165	8483.65	6025.9	7394.76	5718	7028.72	6449.83	6835.57	6797.7	5.257	70.64	135.014	199.325	43.837	37.946	41.044	46.164	1454.93	-423.928	559.192	-1079.7
1166	7691.09	6519.92	6347.79	6699	7525.56	7030.23	7242.77	8900.45	4.851	71.139	134.966	199.154	43.925	37.938	40.92	46.537	165.53	-510.308	-894.985	-2201.45
1167	9010.15	6124.5	4991.87	6748	7719.39	7148.06	7069.56	7323.55	4.889	71.05	134.705	198.959	44.074	37.552	40.915	46.133	1290.76	-1023.55	-2077.69	-575.549
1168	8018.04	7157.37	7895.21	5489	7328.81	7926.57	7812.04	7014.15	4.831	71.222	134.918	199.023	43.831	38.14	41.116	46.077	689.233	-769.197	83.175	-1525.15
1169	5603.16	7464.14	7123.76	5748	7518.24	8211.43	7434.19	6694.35	5.136	71.232	134.979	198.938	44.121	38.144	41.021	46.054	-1915.08	-747.285	-310.433	-946.349
1170	7465.61	5033.86	6280.04	4416	6877.76	7446.51	6910.14	6732.38	5.126	71.084	135.117	199.418	43.788	37.934	41.37	46.149	587.852	-2412.65	-630.103	-2316.37
1171	5861.33	5444.22	5396.57	6368	7441.66	5925.42	7024.64	6623.5	4.663	71.085	135.292	199.144	44.037	37.795	40.957	45.915	-1580.33	-481.199	-1628.07	-255.499
1172	7364.15	5849.6	5762.42	6485	8598.39	6887.15	7715.74	6321.9	5.342	70.91	134.875	199.332	43.714	37.939	40.848	45.904	-1234.24	-1037.55	-1953.32	163.1
1173	9076.66	7125.5	4478.77	6865	7606.17	5570.97	6438.35	6414.2	5.037	70.915	134.994	199.263	43.832	38.009	40.925	45.903	1470.49	1554.53	-1959.57	450.8
1174	5549.04	7808.77	7726.29	8888	7642.81	6078.86	6218.16	6654.7	5.167	70.854	134.776	198.812	43.771	38.168	41.251	46.097	-2093.77	1729.9	1508.13	2233.3
1175	6907.55	7571.71	5713.64	5012	7026.89	6519.1	6204.36	6603.68	4.932	70.989	135.003	199.138	43.903	37.992	41.208	46.186	-119.334	1052.62	-490.717	-1591.67
1176	8793.69	4848.61	7573.62	5607	7158.43	5918.3	6602.76	5972.52	5.29	70.89	134.903	199.028	44.115	37.939	40.713	46.006	1635.26	-1069.69	970.867	-365.524
1177	7162.35	5142.43	7123.76	7030	7258.82	6637.25	6729.88	6530.55	5.06	71.059	135.03	198.779	43.595	38.065	41.082	46.245	-96.476	-1494.82	393.88	499.45
1178	7178.13	5113.55	4687.44	6015	7332.1	7310.56	6279.22	6432.4	5.022	71.222	135.035	198.896	44.055	37.855	40.821	45.779	-153.973	-2197.01	-1591.78	-417.399
1179	6952.65	4910.36	6587.17	6829	7855.33	5600.75	6383.74	6278.35	4.942	71.019	135.132	198.857	44.108	38.044	40.867	46.214	-902.677	-690.387	203.433	550.65
1180	11817.4	4759.96	6968.38	5692	6376.52	5830.9	6439.23	5463.9	4.919	70.84	134.938	199.02	44.023	37.993	41.389	45.929	5440.84	-1070.94	529.155	228.1
1181	8354	5656.38	4540.2	4994	8137.46	5450.55	6523.19	6126.25	5.07	70.827	135.011	199.281	43.868	38.146	40.665	46.005	216.545	205.827	-1982.99	-1132.25
1182	8476.89	5789.84	4461.61	7414	7326.24	5236.26	5980.94	5570.82	5.093	71.077	135.082	198.898	43.959	37.827	41.167	45.891	1150.65	553.586	-1519.33	1843.17
1183	6657.27	6506.97	5911.47	6219	7397.69	6500.97	6956.23	7534.15	4.975	71.117	135.051	199.333	43.868	37.866	41.039	45.832	-740.416	6.001	-1044.76	-1315.15
1184	7474.63	5728.09	7511.29	4819	7288.87	5704.01	6801.22	6606.27	5.04	71.087	135.038	199.248	44.029	37.816	41.066	46.484	185.767	24.079	710.072	-1787.27
1185	5794.81	7017.93	5870.82	7718	7346.03	7576.64	7891.6	7032.02	5.118	71.065	135.005	198.9	43.981	38.115	41.26	45.743	-1551.21	-558.714	-2020.78	685.975
1186	6427.28	5273.9	5745.26	6430	7134.98	6021.89	5859.98	6055.07	5.02	71.149	134.864	198.941	43.727	37.981	40.775	45.862	-707.693	-747.982	-114.723	374.925
1187	9128.52	6016.93	6657.63	4833	7052.54	5438.57	7187.28	5641.02	5.181	71.031	134.598	198.945	43.925	37.849	41.242	46.049	2075.99	578.362	-529.651	-808.024
1188	6228.86	4379.48	5373.08	5842	6884.72	5854.86	6653.55	6577.02	5.197	70.992	135.24	199.033	43.843	37.781	41.137	46.043	-655.861	-1475.37	-1280.46	-735.024
1189	8496.05	5801.79	6909.67	6570	7309.75	6853.81	6459.19	6122.02	4.733	71.043	135.045	198.74	43.91	37.852	41.065	46.199	1186.3	-1052.02	450.474	447.975
1190	7162.35	4577.69	6954.83	5528	7560.74	6983.94	5910.48	6906.9	4.84	70.837	134.988	198.971	44.163	37.862	40.709	45.824	-398.392	-2406.25	1044.35	-1378.9
1191	7343.86	6645.42	5963.87	5937	8042.93	6992.36	6626.54	6334.25	5.198	71.232	135.293	198.906	44.112	37.967	41.134	45.741	-699.069	-346.936	-662.668	-397.249
1192	7237.88	7434.26	6847.34	4713	8945.74	7636.2	7844.62	6741.15	4.75	71.351	135.259	198.908	44.011	38.356	41.05	46.091	-1707.86	-201.941	-997.289	-2028.15
1193	10391.2	6512.95	5386.63	4971	6733.03	6923.41	7692.25	6312.48	4.954	70.784	134.962	198.957	44.027	38.085	41.132	46.047	3658.17	-410.457	-2305.62	-1341.47
1194	9369.79	5491.04	6203.25	6775	7472.44	6551.79	6987.06	7097.68	4.75	70.863	135.076	198.801	43.949	38.139	41.055	46.117	1897.35	-1060.76	-783.807	-322.674
1195	7512.97	6986.06	6592.59	5881	8527.31	7257.47	5741.37	5531.18	4.936	70.818	135.149	199.073	43.979	37.894	41.023	45.919	-1014.35	-271.413	851.22	349.825
1196	7808.34	7677.29	6872.63	6332	7638.42	6559.56	7446.52	6662.82	4.727	71.086	134.777	198.556	43.791	38.036	41.219	46.041	169.927	1117.73	-573.892	-330.824
1197	7179.26	7235.06	5790.43	7210	7150.73	6173.7	5978	6673.23	5.113	71.221	134.93	199.43	43.964	38.062	40.972	45.799	28.523	1061.36	-187.578	536.775
1198	7616.69	6560.76	6897.02	4474	7865.22	7329.01	6936.27	6315.07	5.054	71.206	134.952	198.864	43.646	37.766	41.105	46.04	-248.533	-768.251	-39.249	-1841.07
1199	7564.82	5718.13	6412.83	5468	6863.11	5622.11	6417.5	6760.98	5.054	70.863	134.942	198.851	43.778	38.137	40.883	45.914	701.719	96.016	-4.674	-1292.97
1200	7232.24	5369.52	8595.3	5042	8196.08	5798.21	5317.73	6534.77	4.777	70.925	134.837	199.016	43.959	38.059	41.025	45.95	-963.838	-428.684	3277.57	-1492.77
1201	6117.25	7253.98	4799.46	6168	8372.69	5592.33	5990.63	6534.45	4.972	70.93	135.225	198.977	44.085	38.185	40.783	45.973	-2255.44	1661.65	-1191.17	-366.449
1202	6553.55	6958.17	5713.64	7643	7354.45	7422.88	6895.46	6000.15	5.091	70.964	134.95	199.221	44.077	38.055	40.898	46.04	-800.901	-464.715	-1181.82	1642.85
1203	8874.86	7439.24	7413.73	7002	6713.98	5921.22	7969.99	6577.35	5.212	70.921	134.938	199.013	43.717	37.998	40.798	46.081	2160.88	1518.03	-556.255	424.65
1204	6131.9	6468.13	6474.26	5479	6925.03	6456.95	6105.42	6719.05	5.037	70.842	135.255	199.322	44.049	38.021	41.091	46.008	-793.122	11.18	368.835	-1240.05
1205	7295.38	6140.44	8173.44	7224	7379.73	7238.05	6061.09	7598.5	5.083	70.634	134.95	198.883	44.003	38.135	41.087	45.962	-84.356	-1097.61	2112.35	-374.499
1206	6404.73	4613.55	8208.67	7021	8977.62	6830.5	7619.44	5672.23	5.098	71.051	135.314	198.947	43.941	37.974	40.925	45.927	-2572.89	-2216.96	589.228	1348.78
1207	8012.4	6868.53	6436.31	7342	8009.95	6110.26	7598.31	6086.6	5.228	71.112	135.22	198.996	43.965	37.837	40.735	46.229	2.452	758.267	-1161.99	1255.4
1208	7535.51	7189.24	6037.04	7186	8619.65	6655.06	6372.29	6969.3	4.751	71.081	134.961	198.875	43.932	37.908	40.894	46.105	-1084.13	534.188	-335.252	216.7
1209	6718.15	9100.6	6838.3	6317	6823.53	6904.63	7486.74	6261.12	4.929	71.144	135.261	199.033	43.879	38.132	41.077	45.754	-105.382	2195.97	-648.441	55.875
1210	7082.3	6560.76	6837.4	5965	7239.4	5766.81	6756.3	7822.43	5.01	71.016	135.238	199.104	44.361	37.764	41.185	46.316	-157.102	793.949	81.098	-1857.42
1211	7872.6	6486.06	6153.57	4910	6920.27	6289.59	5696.16	6613.75	5.181	71.261	134.804	199.056	44.328	38.077	40.909	46.069	952.339	196.464	457.407	-1703.75
1212	6984.22	4981.08	6152.66	6083	7293.63	6716.23	6320.91	6303.38	5.159	71.283	134.917	198.984	44.127	38.101	40.939	45.991	-309.413	-1735.16	-168.247	-220.374
1213	6801.58	5952.19	5296.3	5343	9367.84	5984.01	6758.65	7154.88	4.939	71.193	134.912	199.143	44.062	37.877	41.12	46.169	-2566.26	-31.822	-1462.35	-1811.87
1214	8036.08	6243.03	7530.26	6451	7805.86	6710.73	6480.04	5490.23	4.794	71.399	135.004	198.979	43.999	37.986	40.795	46.035	230.214	-467.703	1050.23	960.775
1215	8182.64	5607.57	7429.09	5721	8109.98	5685.23	7632.07	6786.65	5.185	71.252	135.143	198.867	43.839	37.864	41.167	45.93	72.661	-77.663	-202.98	-1065.65
1216	8379.93	9093.62	5579.04	5700	6881.43	5634.41	6886.95	6255.93	5.032	71	134.95	199.107	44.145	38.246	40.869	46.064	1498.51	3459.21	-1307.9	-555.924
1217	5823	4839.64	6588.98	7015	8091.66	6593.88	7070.15	7122.38	4.881	71.08	135.044	199.115	44.247	37.861	40.685	45.862	-2268.66	-1754.23	-481.164	-107.374
1218	7966.18	7861.55	7345.98	8387	7598.48	7438.42	6607.75	5675.48	4.977	70.866	135.275	198.887	44.022	38.194	41.179	46.063	367.7	423.132	738.234	2711.53
1219	8187.15	7434.26	7503.16	5176	7376.44	6841.83	6952.71	5191.88	5.105	71.211	134.972	199.266	43.786	38.215	40.929	46.03	810.71	592.43	550.452	-15.874
1220	6469	5131.47	7523.03	5646	7713.16	7264.59	7065.15	6117.8	5.163	71.202	135.03	199.038	44.018	37.845	40.971	46.256	-1244.16	-2133.12	457.882	-471.799
1221	7487.03	5727.09	6243.9	6814	7043.01	5814.07	7420.69	7866.3	4.933	71.108	135.249	199.09	43.987	37.837	41.016	45.884	444.025	-86.976	-1176.78	-1052.3
1222	7747.46	6914.34	6476.97	7218	8339.71	6111.23	6849.95	7310.55	4.701	71.008	135.008	199.149	44.023	37.947	41.213	45.896	-592.248	803.113	-372.989	-92.549
1223	7376.55	6956.18	7021.68	5066	7558.17	6699.73	7438.6	6238.7	5.194	71.19	135.058	198.924	44.028	38.074	40.936	45.853	-181.622	256.449	-416.914	-1172.7
1224	7269.45	7849.6	8009.94	8248	7800.37	6139.07	7026.69	7419.43	5.091	70.877	134.958	198.651	44.043	38.112	40.752	46.007	-530.918	1710.53	983.243	828.575
1225	7352.88	7807.77	5737.13	5043	7341.99	6387.35	6492.66	5928.65	4.894	71.153	135.177	199.168	43.753	37.952	40.997	45.932	10.879	1420.42	-755.532	-885.649
1226	9936.87	6178.29	7090.33	6461	6814.74	6141.34	7504.65	7595.25	5.099	71.001	134.98	198.902	44.149	38.009	40.956	46.151	3122.12	36.952	-414.317	-1134.25
1227	8465.61	8735.06	6114.72	7228	7837.37	8152.52	6516.15	6460.35	5.19	70.97	134.847	199.308	43.762	37.784	40.945	45.923	628.241	582.545	-401.422	767.65
1228	8554.68	7787.85	6334.24	7784	5992.16	6840.21	7264.5	5938.4	4.9	71.316	134.979	198.845	44	37.694	41.2	45.98	2562.51	947.634	-930.261	1845.6
1229	8671.93	4964.14	5637.76	5662	7036.41	6802.34	7004.68	6347.25	5.211	71.334	135.117	198.721	44.087	37.885	41.035	46.227	1635.51	-1838.2	-1366.91	-685.249
1230	5237.88	8121.51	6480.58	5346	7216.32	6767.7	6997.63	5285.15	4.798	71.206	135.06	199.166	43.899	38.102	41.11	46.16	-1978.44	1353.81	-517.05	60.85
1231	6916.57	4328.69	6306.23	7137	6639.6	7166.83	7138.84	6118.45	4.846	70.919	134.928	199.11	43.883	38.053	40.841	46.334	276.973	-2838.15	-832.61	1018.55
1232	7009.02	5822.71	4505.87	6113	7993.46	6607.15	6839.97	6249.75	5.278	71.131	135.067	199.077	44.133	38.157	41.36	46.256	-984.441	-784.436	-2334.1	-136.749
1233	6847.8	5611.55	7588.08	3673	7077.82	6424.58	7004.68	6241.95	5.241	70.67	135.121	198.926	43.955	38.004	40.982	45.992	-230.016	-813.022	583.401	-2568.95
1234	8024.8	5605.58	6009.03	7794	6823.9	6854.13	7541.94	6122.68	5.107	71.308	134.999	198.965	43.984	37.925	40.935	45.979	1200.9	-1248.56	-1532.9	1671.33
1235	6793.69	6523.9	6121.05	4649	8352.17	4834.21	7201.67	6623.82	5.283	70.982	135.05	198.981	43.759	37.803	41.1	45.887	-1558.48	1689.69	-1080.62	-1974.82
1236	6033.82	6171.31	7288.17	5972	7433.23	6150.07	6405.17	5311.15	5.113	70.775	134.874	199.047	44.137	37.703	40.784	45.794	-1399.41	21.24	882.995	660.85
1237	8438.56	7020.92	6526.65	7737	7039.71	6968.73	6473.87	5004.02	5.094	71.176	135.045	199.077	43.953	38.244	40.984	46.081	1398.84	52.191	52.778	2732.97
1238	6356.26	6497.01	6434.51	6622	7723.06	6548.56	6739.57	7173.73	4.898	71.26	134.502	199.29	43.999	37.961	41.236	45.691	-1366.8	-51.543	-305.058	-551.724
1239	6490.42	7352.59	6546.52	4901	7838.47	5628.91	6517.61	6801.27	5.057	70.813	134.975	199.048	43.762	38	40.999	45.86	-1348.05	1723.68	28.907	-1900.27
1240	5527.62	4418.33	7093.95	6412	9345.86	6450.8	7086	5021.57	4.92	71.12	134.644	199.036	43.725	37.963	41.038	46.039	-3818.24	-2032.47	7.949	1390.42
1241	6301.02	5763.94	8318.88	5064	7083.68	6606.5	7686.38	7307.95	5.063	71.017	134.801	199.072	44.017	37.897	40.869	46.045	-782.665	-842.554	632.498	-2243.95
1242	8922.21	6904.38	6711.83	5578	6981.82	5617.9	6099.26	5168.48	4.909	71.095	134.886	198.952	44.039	38.016	40.895	45.905	1940.39	1286.48	612.579	409.525
1243	6908.68	7513.94	5824.75	5860	7965.25	5068.9	7170.85	6322.23	4.972	70.74	135.199	199.16	43.922	38.309	40.92	46.037	-1056.57	2445.05	-1346.09	-462.224
1244	7483.65	8138.45	6846.43	5640	6263.67	7268.15	5629.52	7021.62	4.897	71.135	134.991	199.321	43.939	38.169	41.037	45.896	1219.98	870.294	1216.91	-1381.62
1245	9492.67	6508.96	5587.17	5333	7658.94	6311.6	7347.29	6075.55	5.161	71.022	135.209	198.912	43.996	38.092	41.262	45.795	1833.74	197.361	-1760.12	-742.549
1246	9985.34	7588.65	5491.42	6174	7387.43	7816.19	7420.98	5534.75	4.95	71.441	134.965	198.792	43.894	38.003	41.067	46.074	2597.91	-227.539	-1929.56	639.25
1247	10015.8	6184.26	7678.41	6800	7355.92	6411.95	7511.7	6420.7	5.174	71.192	135.277	198.792	43.757	38.095	40.806	45.957	2659.86	-227.688	166.712	379.3
1248	8114.99	7222.11	6133.69	7755	8177.76	7967.36	6559.3	7830.55	4.932	70.835	135.096	199.188	44.188	37.924	40.952	45.743	-62.767	-745.243	-425.609	-75.549
1249	8465.61	7200.2	6486	4528	7494.79	6049.4	7048.71	6272.82	5.171	71.026	134.757	199.079	43.765	38.426	40.753	45.928	970.829	1150.8	-562.714	-1744.82
1250	9966.18	6352.59	5720.87	6980	8949.04	6848.31	7605.06	5399.88	4.667	71.112	135.111	199.285	43.893	37.853	41.073	46.352	1017.14	-495.716	-1884.19	1580.12
1251	9268.32	6951.19	4978.32	6519	7687.88	7158.09	7204.02	6032	4.618	71.163	135.041	198.95	43.39	37.901	40.862	45.947	1580.44	-206.896	-2225.7	487
1252	8683.2	7655.38	5707.32	5417	7236.84	6835.03	7393.68	6054.1	4.991	70.98	135.252	198.812	43.868	38.259	40.789	46.052	1446.36	820.344	-1686.36	-637.099
1253	7933.48	5668.33	7355.92	5029	7505.41	8070.62	6689.36	6747.98	5.004	71.36	134.956	199.111	44.069	37.795	40.95	45.814	428.072	-2402.29	666.554	-1718.97
1254	8604.28	7309.76	5091.24	5665	7709.5	5445.69	6913.96	7553	4.893	71.081	135.087	198.965	44.027	37.872	40.996	46.23	894.786	1864.07	-1822.72	-1888
1255	10076.7	5210.16	6577.24	5253	10065.8	5795.94	7376.94	7969.65	4.85	71.054	134.99	199.129	43.928	37.979	40.784	46.036	10.823	-585.781	-799.705	-2716.65
1256	6576.1	7464.14	6233.06	8375	7480.13	8010.41	6827.35	6725.88	4.814	71.173	134.887	199.269	44.326	37.819	40.67	46.004	-904.029	-546.264	-594.285	1649.12
1257	8222.1	7190.24	5478.77	7588	8210.01	7728.78	5867.32	7753.2	4.902	71.085	134.925	199.055	43.897	37.882	41.258	45.991	12.091	-538.545	-388.549	-165.199
1258	7160.09	6439.24	6823.85	6400	8027.9	8386.23	6985.89	7609.55	4.781	70.896	134.944	199.082	43.825	38.078	40.495	45.989	-867.812	-1946.99	-162.036	-1209.55
1259	7547.91	6226.1	6496.84	5532	8007.38	6481.55	6324.14	5823.35	5.152	70.744	134.942	198.99	43.976	38.002	40.912	46.03	-459.469	-255.452	172.696	-291.349
1260	7339.35	8615.54	6300.81	5816	7383.03	6198.31	7011.43	6243.9	4.965	70.83	135.252	199.155	43.867	37.936	41.006	46.101	-43.686	2417.23	-710.613	-427.899
1261	10372	7364.54	5737.13	6878	8504.23	6656.67	7214.3	5882.18	4.846	71.016	135.178	198.96	44.192	38.082	41.018	45.94	1867.81	707.869	-1477.17	995.825
1262	7841.04	6450.2	8467.03	5617	7787.91	7112.77	7094.22	6660.55	4.936	70.928	134.993	198.799	43.859	37.83	41.175	46.003	53.129	-662.574	1372.81	-1043.55
1263	6640.36	7389.44	6476.06	5545	7197.63	6751.84	6844.96	6970.6	4.917	70.907	135.067	199.034	43.914	37.801	40.751	45.89	-557.271	637.6	-368.901	-1425.6
1264	6890.64	6648.41	7288.17	5422	8345.21	7706.12	6566.06	8196.83	5.097	70.789	134.872	198.938	43.95	37.955	41.401	46.158	-1454.57	-1057.72	722.109	-2774.82
1265	7222.1	9313.75	5743.45	6828	7230.61	6506.47	6665.88	6607.25	5.351	71.202	135.107	198.955	43.965	37.788	40.985	46.154	-8.511	2807.27	-922.424	220.75
1266	6764.37	7748.01	6440.83	6829	6905.61	7311.53	6614.2	6028.43	4.938	70.952	135.043	198.885	43.985	38.123	40.985	45.984	-141.233	436.479	-173.373	800.575
1267	7001.13	7226.1	5906.05	7547	7922.74	5992.75	6863.75	6943.95	4.887	71.236	134.965	198.525	44.182	38.236	40.918	45.974	-921.617	1233.34	-957.7	603.05
1268	5173.62	6376.49	6006.32	6484	8299.04	6410.01	7296.79	7078.18	4.832	71.32	135.035	199.042	43.924	38.097	41.277	46.212	-3125.42	-33.515	-1290.47	-594.174
1269	7969.56	5771.91	5900.63	6097	8006.28	5327.54	7571	6924.12	4.891	70.998	134.839	198.998	44.098	38.22	41.052	45.717	-36.724	444.373	-1670.37	-827.124
1270	8011.27	7097.61	6436.31	7307	6678.44	5766.16	6502.94	6490.25	5.089	71.087	135.02	199.128	43.905	38.16	40.899	46.226	1332.84	1331.45	-66.62	816.75
1271	8558.06	6985.06	7958.45	4837	6581.34	7122.16	7306.77	6890.32	5.236	71.025	135.004	199.18	43.879	37.964	41.231	45.959	1976.72	-137.101	651.671	-2053.32
1272	7464.49	5620.52	6615.18	7887	7728.19	6345.92	6584.85	6490.9	4.97	70.967	134.921	199.026	44.143	37.889	41.166	46.321	-263.697	-725.397	30.33	1396.1
1273	6357.38	5838.65	4753.39	5536	7789.37	6656.03	7723.08	6702.15	5.3	71.036	135.085	199.109	43.853	37.952	40.836	46.088	-1431.99	-817.379	-2969.69	-1166.15
1274	6643.74	7831.67	7093.04	6021	7162.09	5678.44	6868.45	6279.65	5.306	71.161	135.038	199.254	43.857	37.732	41.072	46.091	-518.347	2153.24	224.593	-258.649
1275	8700.11	6770.92	5750.68	5829	7123.98	6997.86	6956.53	5964.73	4.931	71.044	134.899	198.924	43.948	37.994	40.876	46.012	1576.13	-226.941	-1205.85	-135.724
1276	7965.05	8451.19	5524.84	5813	6521.25	7018.9	6141.24	7564.38	5.059	70.697	135.089	198.871	43.929	38.142	40.85	45.871	1443.8	1432.3	-616.395	-1751.37
1277	7773.39	6461.15	6368.56	6821	7773.62	8795.07	7423.03	5763.23	5.066	71.141	134.865	199.356	44.351	37.963	41.316	45.95	-0.224	-2333.91	-1054.47	1057.78
1278	8205.19	6436.26	6757.9	6084	6187.46	7791.26	7853.43	6471.4	4.988	71.221	134.841	199.32	44.14	37.91	41.214	45.846	2017.73	-1355	-1095.53	-387.399
1279	8199.55	5193.23	5373.98	6998	7997.86	7217.33	7733.06	5383.95	5.076	71.19	134.577	198.962	43.902	38.295	40.817	46.135	201.691	-2024.1	-2359.08	1614.05
1280	7606.54	5071.71	5941.28	4778	7485.63	6916.93	6383.74	5862.02	5.018	71.131	134.715	198.886	44.306	38.209	40.828	45.653	120.913	-1845.22	-442.456	-1084.02
1281	9580.61	6669.32	7457.99	7132	8835.46	5821.84	7085.7	6092.12	4.815	71.248	135.142	199.069	43.832	38.118	40.989	45.952	745.152	847.485	372.29	1039.88
1282	7235.63	6414.34	6935.86	5963	7806.96	6407.1	8219.83	5341.7	5.258	71.116	134.883	198.665	44.096	38.267	41.162	45.984	-571.335	7.246	-1283.96	621.3
1283	7024.8	6319.72	5686.54	7091	8289.51	6510.36	7445.35	5517.85	4.872	71.229	135.091	199.041	43.861	37.967	41.256	45.964	-1264.71	-190.636	-1758.81	1573.15
1284	8146.56	6375.5	7603.43	8092	8611.22	6393.18	8115.9	6546.8	4.96	71.01	135.319	198.892	43.996	38.067	40.816	45.94	-464.655	-17.678	-512.465	1545.2
1285	7505.07	5527.89	7053.3	7668	7485.63	5629.23	7221.34	5670.27	4.702	71.016	134.8	199.202	44.145	38.044	40.944	46.12	19.448	-101.344	-168.043	1997.72
1286	7904.17	6470.12	4759.71	4893	6342.08	5446.99	7172.31	6496.75	4.885	70.941	135.065	199.113	44.005	38.062	41.098	45.891	1562.09	1023.13	-2412.6	-1603.75
1287	7331.45	5687.25	7238.48	4590	7162.09	7330.63	6541.98	5824	5.07	71.131	135.084	198.891	44.016	38.178	40.872	45.804	169.363	-1643.38	696.5	-1234
1288	7304.4	6284.86	5471.55	4648	8007.75	6446.27	6385.21	7150.32	5.221	71.218	135.076	199.179	43.963	37.961	41.079	45.968	-703.353	-161.403	-913.662	-2502.32
1289	6266.06	5569.72	5587.17	6401	7165.39	6109.94	6514.39	7462	5.211	71.041	134.802	198.81	44.27	38.222	41.11	46.004	-899.323	-540.213	-927.212	-1061
1290	6127.4	7049.8	7005.42	5001	7788.27	6961.6	7260.68	7116.52	5.057	70.849	135.335	199.351	44.181	38.197	40.852	46.003	-1660.88	88.197	-255.261	-2115.52
1291	7799.32	6088.65	5866.31	5197	8534.27	6551.79	5690.29	6618.62	4.997	71.179	134.915	199.135	43.853	37.835	41.07	46.006	-734.948	-463.146	176.016	-1421.62
1292	6609.92	7751	5696.48	5138	7979.54	5526.94	6339.11	6239.02	4.854	70.739	134.957	199.103	44.011	37.85	40.93	45.899	-1369.62	2224.05	-642.637	-1101.02
1293	9326.94	5535.86	4914.18	8987	7641.71	6056.2	6648.56	5099.9	4.808	70.966	134.847	198.752	44.323	38.307	41.366	46.194	1685.23	-520.343	-1734.37	3887.1
1294	9131.91	5693.23	5235.77	5762	7501.02	6218.05	6743.97	6454.18	5.098	71.05	135.07	199.111	43.833	37.966	41.031	45.822	1630.89	-524.825	-1508.2	-692.174
1295	5608.79	6963.15	8338.75	8329	7725.25	6645.99	6778.91	6394.38	5.208	71.186	135.08	198.727	43.949	37.985	41.006	46.01	-2116.46	317.156	1559.85	1934.62
1296	6023.68	6867.53	7162.6	6360	7596.65	6488.35	6797.7	6055.4	5.041	71.115	135.255	199.126	44.117	38.078	41.056	46.048	-1572.97	379.183	364.905	304.6
1297	8051.86	5433.27	6782.29	7495	7741.01	6736.95	6495.89	6766.18	4.896	71.338	134.88	198.794	43.717	37.851	40.801	45.954	310.851	-1303.68	286.405	728.825
1298	5702.37	7690.24	6892.5	6713	7512.74	6725.62	6958.88	7765.88	5.128	71.197	135.144	198.959	43.985	37.886	41.099	45.938	-1810.37	964.617	-66.372	-1052.87
1299	6269.45	6457.17	4785.91	6236	8540.5	6489.64	6250.45	7280.32	5.119	71.002	135.281	199.13	43.615	38.059	40.922	45.998	-2271.05	-32.469	-1464.54	-1044.32
1300	8604.28	6467.13	7225.84	6860	7459.61	5392.93	6608.63	6539.65	5.241	70.858	135.181	199.105	43.979	38.321	41.084	45.919	1144.67	1074.2	617.209	320.35
1301	6266.06	5294.82	6925.93	5897	9522.46	6263.69	6224.62	7228.98	4.843	71.096	134.831	198.716	43.827	38.195	41.056	46.095	-3256.4	-968.874	701.31	-1331.97
1302	8480.27	6357.57	4679.31	6286	8304.17	5939.02	6497.65	6445.07	4.836	71.129	134.972	199.107	44.003	37.918	41.01	46.073	176.099	418.551	-1818.34	-159.074
1303	9183.77	6097.61	5944.9	5629	7673.96	6933.12	6378.45	6832.15	5.192	70.955	134.933	199.014	44.091	37.992	41.032	45.925	1509.81	-835.507	-433.558	-1203.15
1304	10210.8	7266.93	6221.32	6155	7393.66	6367.93	6945.96	6158.1	5.328	71.092	135.009	199.302	44.008	38.28	41.038	46.175	2817.16	899.004	-724.638	-3.099
1305	8347.24	5155.38	5392.95	6807	7864.49	6467.95	6491.19	6793.48	5.045	71.071	135.124	199.015	44.151	38.121	41.105	45.922	482.751	-1312.57	-1098.24	13.525
1306	6809.47	4886.45	7003.61	5519	7760.8	6254.95	7447.99	7178.93	5.069	71.35	135.128	198.98	44.266	37.895	40.825	46.007	-951.324	-1368.5	-444.376	-1659.92
1307	6689.97	6781.87	5859.98	6708	7765.92	5771.66	7504.36	6472.7	5.1	71.054	135.037	198.838	43.754	38.076	41.111	46.109	-1075.96	1010.21	-1644.38	235.3
1308	6359.64	7473.11	6735.32	6642	6915.5	6478.31	5884.06	6217.9	5.05	71.018	134.931	199.077	44.107	38.318	40.778	46.153	-555.861	994.796	851.265	424.1
1309	7650.51	6029.88	7614.27	5676	6409.5	4875.97	6881.37	6682.65	5.17	70.851	134.592	199.14	44.064	38.129	40.71	46.263	1241.01	1153.91	732.904	-1006.65
1310	7638.11	5885.46	5729	6457	6594.53	7431.3	6433.06	5993	4.925	71.074	135.054	198.811	44.014	38.293	40.905	45.96	1043.57	-1545.84	-704.064	464
1311	8219.84	5352.59	5804.88	6921	6049.32	5559.64	5735.5	6379.75	5.166	70.826	135.065	199.392	44.03	38.052	41.022	46.137	2170.52	-207.046	69.377	541.25
1312	7812.85	6650.4	7799.46	6913	9609.67	6896.54	6851.72	6309.23	4.985	71.053	134.893	199.114	43.828	38.028	40.811	45.901	-1796.81	-246.139	947.742	603.775
1313	6856.82	4800.8	5556.46	4574	7775.09	6355.3	5670.32	5624.77	4.855	71.079	134.844	198.728	44.219	38.097	40.951	46.193	-918.263	-1554.51	-113.865	-1050.77
1314	7892.9	6111.55	5676.6	4781	7276.41	6367.6	6686.72	6230.9	4.756	71.433	135.073	198.99	44.034	37.99	40.792	46.123	616.488	-256.05	-1010.12	-1449.9
1315	8152.2	6711.15	6445.35	5968	7008.2	7118.28	6162.96	5421.32	5.102	70.874	135.013	199.184	44.026	37.707	40.713	45.773	1144	-407.121	282.385	546.675
1316	5540.02	7644.42	7361.34	5451	9468.97	6518.45	5829.45	6913.07	5.054	71.342	135.054	199.049	43.906	37.96	40.884	45.987	-3928.95	1125.97	1531.89	-1462.07
1317	6692.22	6248.01	5710.93	6525	7125.09	8200.75	6790.65	6778.2	5.03	70.897	134.801	199.377	43.92	37.967	41.339	45.808	-432.863	-1952.74	-1079.72	-253.199
1318	6467.87	5645.42	6226.74	6569	9330.47	5803.39	6321.79	6212.7	5.031	71.029	134.812	198.843	44.139	38.197	40.924	46.093	-2862.6	-157.967	-95.053	356.3
1319	7863.59	4815.74	6271	7165	6793.86	7228.34	7046.66	6219.85	5.077	70.907	134.958	198.969	43.91	37.927	40.845	46.049	1069.73	-2412.6	-775.654	945.15
1320	7684.33	5984.06	6545.62	5561	7599.58	6545.64	6671.16	6609.52	4.738	71.203	134.918	199.103	44.414	37.923	40.942	46.038	84.752	-561.578	-125.541	-1048.52
1321	10062	8234.06	8126.47	7353	8071.14	6247.19	6781.26	5579.93	5.145	71.195	134.997	198.729	43.971	38.101	41.073	46.218	1990.87	1986.88	1345.21	1773.08
1322	6452.09	6395.42	6658.54	6994	6655.72	5782.99	5656.53	6394.38	5.212	70.937	135.034	199.252	44.047	38.136	40.868	46.176	-203.635	612.425	1002.01	599.625
1323	7949.27	7170.32	3740.74	6350	7631.45	7011.45	7344.94	7996.95	5.02	71.016	135.124	199.28	44.158	38.301	40.954	45.967	317.813	158.865	-3604.2	-1646.95
1324	7112.74	7098.61	5817.52	6322	7459.61	6793.92	6162.38	7035.6	5.081	71.271	135.053	199.086	43.883	38.258	41.065	45.772	-346.87	304.681	-344.85	-713.599
1325	7833.15	5899.4	6077.69	7812	8077.73	7127.02	6390.2	6456.45	5.288	71.181	134.938	198.983	44.133	37.936	40.999	46.018	-244.588	-1227.61	-312.51	1355.55
1326	6237.88	5962.15	8763.32	6107	7410.88	6843.45	7376.94	6305.65	5.06	71.069	134.888	199.186	43.993	37.82	41.115	45.927	-1173	-881.299	1386.38	-198.649
1327	6129.65	6036.85	6974.71	6665	8402.37	6957.4	7184.64	5908.82	5.097	71.024	135.02	198.793	43.9	38.08	40.935	45.833	-2272.72	-920.542	-209.936	756.175
1328	9279.59	7466.14	5626.92	8548	7855.33	6619.45	6384.91	7020.98	4.968	71.175	135.137	199.048	44.205	38.091	40.968	46.025	1424.27	846.688	-757.994	1527.03
1329	6175.87	6276.89	6386.63	5034	6745.49	5046.56	7023.76	5484.05	5.259	71.037	135.072	199.054	44.09	38.052	40.897	45.461	-569.616	1230.33	-637.126	-450.049
1330	9391.21	4621.51	5902.44	7607	6694.56	5729.58	7061.04	7056.73	4.894	70.896	135.024	198.69	43.978	37.827	40.958	45.888	2696.65	-1108.07	-1158.6	550.275
1331	4953.78	6761.95	6502.26	5960	7408.68	5944.52	5543.5	6545.18	4.961	70.861	134.885	199.324	43.969	37.797	40.99	46.165	-2454.9	817.43	958.762	-585.174
1332	6760.99	5716.14	6166.22	4557	6867.87	6479.28	6665.88	5922.15	5.172	70.801	135.097	198.913	43.957	38.28	41.218	45.805	-106.876	-763.146	-499.66	-1365.15
1333	7429.54	6938.25	5164.41	7651	8624.77	6226.15	5880.53	7069.07	4.839	70.824	134.963	198.94	44.001	38.012	41.105	45.832	-1195.24	712.102	-716.124	581.925
1334	7419.39	5063.74	7186.09	5291	6871.17	6379.26	6936.27	5847.73	5.145	71.066	134.74	199.07	44.458	37.956	40.93	45.989	548.224	-1315.51	249.819	-556.724
1335	6041.71	5099.6	5305.33	4735	8707.95	6207.05	6790.06	5704.73	5.048	71.092	135.026	198.917	43.882	37.913	41.008	45.982	-2666.23	-1107.44	-1484.73	-969.724
1336	4719.28	4853.59	6417.34	6900	6601.49	7408.32	6437.76	6273.48	5.045	71.003	134.93	198.746	44.161	37.956	40.843	46.194	-1882.21	-2554.73	-20.415	626.525
1337	7780.16	7592.63	8818.43	5872	6630.44	6022.86	6380.51	5751.2	5.493	71.215	134.74	199.038	43.855	37.91	41.024	45.846	1149.72	1569.77	2437.92	120.8
1338	7878.24	7430.28	6772.36	6717	7293.26	6080.48	5532.63	6261.12	4.922	71.053	134.636	198.855	43.708	38.2	40.799	46.178	584.977	1349.8	1239.72	455.875
1339	6134.16	8209.16	5892.5	5840	8072.24	6865.79	7031.69	5879.9	4.987	71.173	134.74	198.861	44.016	37.974	41.177	46.148	-1938.08	1343.38	-1139.18	-39.899
1340	5774.52	7107.57	5943.99	5385	7795.24	4740.34	7548.4	5590.65	4.693	71.096	135.162	198.802	44.168	37.936	40.965	46.224	-2020.71	2367.23	-1604.4	-205.649
1341	7264.94	5862.55	5064.14	7790	6561.92	6898.81	7359.91	8097.7	4.963	71.474	134.842	199.229	44.014	37.94	40.836	45.897	703.016	-1036.25	-2295.78	-307.699
1342	8600.9	6510.96	8860.89	7118	7388.53	5874.6	8363.98	6534.77	5.185	71.153	134.765	198.876	44.013	38.244	40.956	46.119	1212.37	636.355	496.906	583.225
1343	8271.7	5741.04	6615.18	6502	6918.8	7814.89	8217.19	7963.15	4.926	71.152	134.858	199.113	44.043	38.14	41.069	45.857	1352.9	-2073.85	-1602.01	-1461.15
1344	5322.44	8817.73	6722.67	5444	7466.57	6072.71	6443.63	6240.32	4.993	71.039	135.022	198.962	43.803	37.856	41.037	46.039	-2144.14	2745.02	279.042	-796.324
1345	8594.14	4684.26	4037.94	5863	8005.19	5854.21	6572.81	5362.18	5.22	71.228	135.08	198.93	44.102	38.021	40.92	46.069	588.952	-1169.94	-2534.87	500.825
1346	7888.39	7241.04	5881.66	4339	6944.81	6834.39	7190.22	6182.48	5.022	70.799	135.466	199.006	43.943	38.016	41.137	46.089	943.574	406.648	-1308.56	-1843.47
1347	7683.2	5932.27	7680.22	6443	7584.92	7608.04	8051.02	6559.8	4.826	70.937	135.078	198.835	43.67	38.034	40.78	45.813	98.281	-1675.77	-370.798	-116.799
1348	6660.65	6076.69	7362.24	9284	8470.52	7181.4	6699.05	7002.12	5.123	71.047	134.942	199.035	44.041	38.106	40.968	46.086	-1809.86	-1104.7	663.189	2281.88
1349	7224.35	8109.56	6557.36	4963	6559.72	5895.32	6265.13	6994.65	4.915	71.11	135.276	198.808	44.058	38.015	41.091	46.264	664.628	2214.24	292.231	-2031.65
1350	10164.6	6169.32	7711.83	4696	7287.77	5894.35	6101.6	6276.73	4.848	70.967	134.963	199.034	44.071	38.014	40.879	45.912	2876.83	274.975	1610.23	-1580.72
1351	8043.97	6323.7	7510.39	6143	7334.3	6083.07	6986.77	6909.18	5.082	71.199	135.002	199.253	44.107	37.925	41.348	46.076	709.667	240.637	523.622	-766.174
1352	5626.83	4883.47	7560.07	5453	7970.74	6016.71	7166.15	7690.15	4.797	71.004	134.976	198.851	43.925	38.018	41.007	45.771	-2343.91	-1133.24	393.925	-2237.15
1353	6343.86	5577.69	6959.35	6379	7896	5399.73	6417.5	7922.85	5.044	70.904	134.851	198.927	43.743	37.863	40.979	45.761	-1552.14	177.963	541.847	-1543.85
1354	7306.65	6385.46	6542.01	4940	6450.17	5651.57	6304.77	5832.12	5.026	70.63	135.092	199.279	44.063	38.174	41.146	46.015	856.483	733.889	237.24	-892.124
1355	5473.51	7003.98	7062.33	7052	6684.67	5452.81	5753.12	5779.48	5.122	71.228	135.034	198.977	43.912	38.015	40.958	46.387	-1211.16	1551.17	1309.21	1272.53
1356	7466.74	7800.8	5284.55	6052	6386.41	6618.15	5198.83	6203.27	5.052	71.132	135.253	198.971	44.107	37.862	41.079	46.017	1080.33	1182.64	85.727	-151.274
1357	5608.79	5832.67	4044.26	5186	7421.51	5626.32	6321.5	5948.48	4.99	70.922	134.838	198.977	43.935	38.284	40.983	45.892	-1812.71	206.35	-2277.24	-762.474
1358	6598.65	6392.43	6807.59	5106	7887.2	5773.61	6919.53	5730.4	4.799	70.931	135.012	198.89	43.99	38.028	40.795	45.725	-1288.56	618.825	-111.946	-624.399
1359	5652.76	4956.18	7838.3	7539	7676.89	6778.71	6511.74	6678.1	5.123	71.221	134.962	199.127	44.107	38.137	40.979	45.887	-2024.12	-1822.53	1326.56	860.9
1360	6182.64	5834.66	6922.31	5873	8272.66	6432.02	7440.94	6200.68	4.919	70.9	135.14	199.09	44.276	37.953	41.075	46.151	-2090.02	-597.36	-518.63	-327.674
1361	7764.37	5503.98	7441.73	4973	7181.88	5919.6	6660.01	6175.32	4.69	71.146	134.856	198.857	43.991	37.827	41.087	45.966	582.497	-415.612	781.73	-1202.32
1362	8349.49	5302.79	5877.15	4382	7926.41	6654.73	6271.3	6509.1	5.075	71.159	135.043	198.957	43.906	38.052	41.062	45.841	423.083	-1351.94	-394.15	-2127.1
1363	7384.44	6671.31	8581.75	7587	7903.33	5836.08	7361.68	7689.18	5.192	70.718	134.94	198.623	43.859	38.099	41.022	45.569	-518.883	835.234	1220.08	-102.174
1364	7593.01	6738.05	7688.35	5029	7622.29	5543.45	5760.46	7035.6	5.395	71.373	135.017	199.017	43.683	38.314	40.978	46.018	-29.283	1194.6	1927.89	-2006.6
1365	7151.07	5009.96	7430.89	6981	6235.82	5113.89	6757.48	7107.75	4.885	70.999	135.061	198.979	43.953	38.197	41.054	46.122	915.248	-103.933	673.419	-126.749
1366	6496.05	7205.18	4340.56	5725	7340.53	7347.46	6488.84	5906.23	5.001	71.062	135.22	199.371	43.888	38.187	40.928	46.14	-844.475	-142.28	-2148.28	-181.224
1367	9664.04	6802.79	6971.09	5139	6664.15	6516.19	6637.69	7438.6	5.147	70.94	135.212	198.848	44.155	38.048	41.283	45.82	2999.89	286.604	333.401	-2299.6
1368	6617.81	5248.01	9492.32	7158	8183.26	6324.23	6859.64	6953.38	4.8	70.879	134.772	198.904	43.944	37.573	40.947	46.105	-1565.44	-1076.22	2632.68	204.625
1369	9841.04	5932.27	7093.95	5894	8137.82	6566.68	7012.6	7233.85	4.965	70.947	134.798	198.858	44.34	37.799	40.845	46.016	1703.21	-634.411	81.346	-1339.85
1370	7396.84	6097.61	6228.55	6410	6746.96	5995.34	7648.22	6609.52	4.833	71.192	134.987	199.065	44.084	38.311	40.8	46.135	649.887	102.266	-1419.67	-199.524
1371	7226.61	6647.41	6538.39	6419	8403.83	5894.99	6752.19	7647.9	5.291	71.104	135.021	199.077	44.289	38.15	41.195	45.973	-1177.23	752.415	-213.798	-1228.9
1372	6084.56	5771.91	6729.9	6353	7742.48	6264.02	6541.4	6438.57	5.161	71.043	134.888	199.101	44.189	37.98	40.99	45.807	-1657.92	-492.106	188.505	-85.574
1373	6503.95	6499	7483.29	5876	7438.36	6257.22	6841.44	5926.05	4.569	71.146	134.915	199.031	44.026	38.078	40.743	45.986	-934.413	241.783	641.847	-50.049
1374	7174.75	7483.07	5616.08	6786	7313.42	8364.54	7154.99	6657.62	4.979	70.848	134.881	198.901	44.295	38.178	40.903	46.03	-138.669	-881.473	-1538.91	128.375
1375	5441.94	7535.86	8032.52	5382	9253.52	6336.53	7271.25	7815.93	4.955	71.011	134.615	198.997	44.12	37.849	41.119	45.944	-3811.58	1199.33	761.269	-2433.92
1376	6441.94	7419.32	7232.16	8225	7569.9	5663.87	6825.59	5896.48	4.978	71.462	134.762	198.896	44.075	38.094	40.891	45.854	-1127.96	1755.45	406.572	2328.53
1377	7369.79	7852.59	7280.04	7511	7270.55	5829.61	6575.16	7658.62	4.999	71.283	135.089	198.716	43.83	37.892	40.809	46.24	99.239	2022.98	704.878	-147.624
1378	8160.09	5814.74	7043.36	7708	8085.06	6784.21	7214.3	6403.48	4.903	71.027	134.907	199.019	44.081	38.278	40.991	46.012	75.028	-969.471	-170.934	1304.53
1379	9533.26	6251.99	5792.23	5828	7962.32	6389.62	6673.8	6198.07	5.133	70.969	135.115	198.931	43.772	38.098	41.103	45.972	1570.94	-137.624	-881.571	-370.074
1380	7923.34	6086.65	4850.95	6922	7092.11	6866.76	6951.83	6523.4	5.128	71.141	135.017	199.078	44.019	38.087	40.886	45.92	831.229	-780.104	-2100.88	398.6
1381	7960.54	6984.06	8144.53	6904	6187.09	4713.47	7571	5626.4	4.75	71.084	134.934	198.995	43.769	38.065	40.816	46.012	1773.45	2270.59	573.532	1277.6
1382	7925.59	5735.06	6517.61	6114	8135.99	6043.25	7054.29	6529.57	5.242	70.991	135.021	198.957	43.938	38.054	41.113	46.153	-210.399	-308.191	-536.675	-415.574
1383	6489.29	6919.32	8397.47	8234	7553.04	6615.24	6237.53	5796.38	4.949	71.001	135.239	198.966	44.227	37.94	41.191	46.024	-1063.75	304.084	2159.94	2437.62
1384	6255.92	5528.88	8411.92	7182	7507.61	6336.2	6604.52	6820.45	5.358	70.919	135.053	198.899	43.609	37.772	40.772	46.021	-1251.69	-807.32	1807.41	361.55
1385	5839.91	7362.55	6585.37	6050	7751.64	6348.51	6178.82	8408.73	5.157	71.27	134.998	198.979	44.137	37.984	41.241	46.223	-1911.72	1014.04	406.549	-2358.72
1386	8913.19	7712.15	5739.84	6865	6776.64	6190.54	7613.87	7757.43	5.225	71.187	135.481	199.004	43.777	37.973	40.767	45.795	2136.56	1521.61	-1874.03	-892.424
1387	5465.61	5943.23	5957.54	6173	7982.47	6103.46	6611.27	6150.62	4.849	71.198	134.803	199.003	44.142	38.07	41.006	45.919	-2516.85	-160.233	-653.725	22.375
1388	7719.28	6014.94	5358.63	6453	7225.11	6380.88	6849.95	6197.43	4.944	71.077	135.124	199.36	43.729	38.018	41.371	45.869	494.166	-365.935	-1491.33	255.575
1389	6326.94	4949.2	6809.4	4790	9199.3	6650.85	7414.81	5575.05	4.969	71.077	134.926	198.792	44.061	37.754	40.93	46.095	-2872.35	-1701.64	-605.419	-785.049
1390	8074.41	6796.81	5247.52	8078	8877.23	6245.57	8405.08	6323.85	4.889	71.108	134.814	199.1	44.311	37.861	40.922	46.158	-802.817	551.245	-3157.56	1754.15
1391	6662.91	6694.22	5990.06	8625	7613.5	6549.85	6103.66	6791.2	4.968	71.045	135.25	198.931	44.316	37.96	41.225	46.009	-950.591	144.373	-113.594	1833.8
1392	5618.94	6009.96	5569.11	6690	7738.81	7254.56	7015.83	7691.77	5.044	70.948	135.202	198.707	44.203	37.832	41.15	45.836	-2119.87	-1244.6	-1446.72	-1001.77
1393	7806.09	5714.14	6999.1	9063	7343.83	6907.22	7175.25	7011.88	5.188	71.156	135.093	199.104	43.807	37.925	41.121	45.914	462.26	-1193.08	-176.151	2051.12
1394	7971.81	8921.32	7654.02	7612	8174.46	6394.8	6331.48	6286.48	4.801	71.533	135.379	198.847	43.921	38.426	40.99	45.901	-202.648	2526.52	1322.54	1325.53
1395	8839.91	5651.39	5098.46	5612	9224.21	5530.18	7241.01	6547.45	5.191	71.343	135.131	199.17	44.157	37.94	41.207	46.18	-384.3	121.215	-2142.55	-935.449
1396	7469	6931.27	6086.72	5810	7293.63	6863.85	6014.41	6472.05	4.965	71.04	135.086	199.02	44.068	38.313	40.685	46.222	175.366	67.43	72.313	-662.049
1397	6650.51	5159.36	7032.52	5569	6413.9	5525.32	5945.71	6645.6	5.291	71.024	135.224	199.215	44.32	38.008	40.941	45.942	236.612	-365.96	1086.81	-1076.6
1398	6864.71	6543.82	5411.92	6086	6905.24	6340.09	7120.05	5898.43	4.808	71.126	135.056	199.033	44.181	38.232	41.086	46.118	-40.529	203.735	-1708.13	187.575
1399	7797.07	5052.79	7609.76	6318	6233.62	5775.87	6199.66	5609.82	4.802	71.22	135.122	198.949	44.161	38.178	41.345	46.134	1563.44	-723.082	1410.1	708.175
1400	6825.25	5555.78	6786.81	6588	8267.53	5173.78	5861.16	6633.25	4.782	70.922	135.104	199.061	43.991	38.146	41.09	46.117	-1442.28	381.997	925.655	-45.249
1401	7677.56	5721.12	6289.97	6144	7366.55	5717.6	6552.85	6311.18	4.912	71.219	135.325	199.211	43.897	37.986	40.899	46.294	311.02	3.511	-262.872	-167.174
