# Supplementary material for: Tracking multiple conformations occurring on angstrom-and-millisecond scales in single amino-acid-transporter molecules
Source: eLife. 2023 Feb 17;12:e82175. doi: 10.7554/eLife.82175 (PMC9937647; doi:10.7554/eLife.82175)
Supplement: Figure 3—figure supplement 1—source data 2. [file elife-82175-fig3-figsupp1-data2.xlsx]

## Sheet: raw intensity trace 0.75mM pt 1
Intensities traces captured from EMCCD camera - [Arg]= 0.75 mM
	Particle Intensity by channel				Background intensity by channel				x-coordinates of particle				y-coordinates of particle				Intensity with background subtracted
Frame #	I45	I135	I90	I0	I45 - bak	I135 - bak	I90 - bak	I0 - bak	x-45	x-135	x-90	x-0	y-45	y-135	y-90	y-0	I45	I135	I90	I0
1	3535	4190.76	2450.42	7238.82	1610.12	1952.43	1765.02	1869.41	27.16	92.167	156.991	220.741	27.125	20.399	21.851	29.066	1924.88	2238.33	685.399	5369.41
2	2729	4289.16	2290.76	6343.53	1858.88	1436.87	1901.05	1773.09	26.917	92.342	156.845	220.791	26.777	20.315	21.918	28.991	870.125	2852.28	389.706	4570.44
3	2657	6643.57	4021.01	5362.35	1664.12	1967.87	1584.87	2646.47	26.957	92.092	157.132	220.844	27.101	19.861	22.128	28.894	992.875	4675.7	2436.13	2715.88
4	2881	6226.91	3081.51	3198.82	2213	1876.63	1826.47	1967.06	26.949	92.183	157.016	220.905	26.847	19.99	21.891	28.847	668	4350.28	1255.04	1231.77
5	2874	2825.3	4205.88	3754.12	1938.5	2496.61	1901.26	2404.56	27.265	92.208	156.836	221.026	27.066	20.099	22.111	29.156	935.5	328.69	2304.62	1349.56
6	1952	3732.93	1621.01	3135.29	1800.5	2422.06	2243.7	2201.03	27.049	92.483	156.9	220.935	26.963	19.89	22.014	29.017	151.5	1310.87	-622.688	934.265
7	1215	5743.98	3090.76	5007.06	2050.75	2228.92	2055.88	2076.91	26.911	92.181	156.983	221.007	26.885	20.248	22.011	29.022	-835.749	3515.06	1034.87	2930.15
8	1108	6526.1	3500.84	5831.77	1952.25	1697.79	1882.77	2078.38	26.946	92.355	156.818	220.894	26.951	20.257	22.105	28.735	-844.249	4828.31	1618.07	3753.38
9	2175	3537.15	2920.17	6707.06	1731	2138.43	2050.32	1842.06	26.796	92.351	156.906	220.757	26.844	19.928	21.841	29.067	444	1398.72	869.853	4865
10	2224	4203.81	3847.06	3289.41	1816.88	1629.64	1550.84	1941.03	27.19	92.082	157.013	220.938	26.973	20.177	22.068	28.864	407.125	2574.17	2296.22	1348.38
11	2091	3158.64	1144.54	5217.65	2027.62	2098.39	2560.4	2667.79	27.203	91.836	157.028	220.85	26.754	19.976	21.999	29.111	63.375	1060.24	-1415.86	2549.85
12	2409	3240.96	2157.14	4511.77	1576.88	1770.96	1855.67	1501.32	27.367	92.144	156.865	220.911	26.81	19.857	21.901	28.794	832.125	1470.01	301.471	3010.44
13	3097	5283.13	1689.92	8017.65	2040.5	2055.09	1899.37	2123.97	27.015	92.157	156.966	221.033	27.187	20.066	22.078	28.421	1056.5	3228.04	-209.453	5893.68
14	2243	4673.69	3409.24	5201.18	1602.62	2365.46	1929.73	2108.82	26.877	91.953	156.966	221.146	27.24	19.968	21.824	28.952	640.375	2308.23	1479.52	3092.35
15	1572	4765.06	3142.86	5687.06	2112.38	1834.84	2139.92	1963.23	27.137	92.172	156.918	220.788	27.02	20.089	21.725	29.159	-540.374	2930.22	1002.94	3723.82
16	1645	5934.74	3468.91	3221.18	1796.12	2177.59	1832.46	2207.06	27.166	92.296	157.131	220.964	27.175	19.945	22.097	28.842	-151.124	3757.15	1636.45	1014.12
17	3042	5781.12	2057.98	2191.76	2175.12	1827.56	1695.8	1513.82	27.078	91.915	156.88	220.881	27.061	19.945	22.083	28.893	866.875	3953.56	362.185	677.941
18	3271	3916.67	2983.19	5749.41	1943.12	1697.92	2027.1	1878.53	27.294	92.305	156.944	220.923	27.138	20.142	21.936	28.769	1327.88	2218.75	956.092	3870.88
19	5408	7317.27	3042.86	4320	1551	2232.81	1798.95	2375	26.822	92.176	157.167	220.801	27.232	20.321	22.181	28.725	3857	5084.46	1243.91	1945
20	4521	6488.96	3956.3	6464.71	1953.62	2264.93	1323.21	1822.35	26.949	92.184	157.288	220.851	26.911	20.077	21.919	28.715	2567.38	4224.02	2633.09	4642.35
21	4573	8348.39	4324.37	8900	1997.38	2503.14	1718.59	1839.41	27.044	92.275	157.219	220.718	26.724	19.963	21.94	28.789	2575.62	5845.26	2605.78	7060.59
22	3642	8916.67	4264.71	5060	1920	1674.32	1961.87	1801.03	27.318	92.193	157.018	220.874	26.915	20.154	21.994	28.851	1722	7242.34	2302.84	3258.97
23	3612	6027.11	5389.92	3742.35	1806.75	2279.24	1993.28	1447.79	26.98	92.103	156.829	220.705	27.067	20.078	22.315	28.91	1805.25	3747.87	3396.64	2294.56
24	4035	7542.17	2298.32	8018.82	1805.75	1558.11	2013.76	2023.23	27.166	92.176	157.205	220.733	27.008	20.139	22.176	28.809	2229.25	5984.06	284.559	5995.59
25	3798	4405.62	3544.54	7792.94	2054.25	1920.93	1798.53	2474.56	26.851	92.067	157.29	221.032	27.176	20.31	21.867	28.706	1743.75	2484.69	1746.01	5318.38
26	3341	5080.32	6522.69	5865.88	1905.88	2344.75	1852.63	2138.97	27.071	92.173	157.081	220.804	26.832	19.897	22.103	28.84	1435.12	2735.57	4670.06	3726.91
27	6785	3944.78	1465.55	6521.18	2139	2318.65	1704.62	1998.97	26.916	92.035	157.02	220.881	27.112	20	21.801	28.82	4646	1626.13	-239.075	4522.21
28	2066	6593.37	3311.76	6348.23	1679.38	1912.53	1480.67	1937.06	27.266	91.99	156.956	220.985	27.002	20.204	21.92	28.946	386.625	4680.85	1831.09	4411.18
29	2981	5194.78	2531.93	6347.06	1961.12	2195.66	2035.4	2102.35	26.78	92.186	157.14	220.919	26.822	20.125	22.132	28.85	1019.88	2999.12	496.534	4244.71
30	3190	6021.08	4184.03	6376.47	2423.38	1808.61	1535.4	1945.29	27.159	92.169	157.113	220.864	27.308	20.274	21.794	28.984	766.625	4212.48	2648.63	4431.18
31	3531	3976.91	3000.84	4676.47	1597.12	2145.08	1678.36	1434.12	26.956	92.355	157.24	220.761	27.216	19.953	22.026	28.757	1933.88	1831.83	1322.48	3242.35
32	3207	3686.75	2412.61	3718.82	2021.88	1861.7	1745.38	1516.32	27.083	92.109	156.903	220.899	26.788	19.897	22.134	28.752	1185.12	1825.05	667.227	2202.5
33	4729	7367.47	2584.87	8135.29	2188.88	2303.97	1491.18	1716.91	26.911	92.513	157.016	220.927	26.89	20.349	22.036	28.838	2540.12	5063.5	1093.7	6418.38
34	3251	4418.68	4299.16	8214.12	2037.12	2407.51	2007.56	1665.59	26.965	92.264	156.72	220.803	26.929	20.2	22.313	28.966	1213.88	2011.17	2291.6	6548.53
35	1376	4614.46	3968.91	1797.65	1659	1881.15	1647.48	1733.23	26.874	92.082	157.307	220.871	26.928	20.143	21.789	28.783	-282.999	2733.31	2321.43	64.412
36	4205	8197.79	3068.91	8556.47	1870.38	1997.49	1673.63	2157.65	27.271	92.336	157.018	220.829	26.921	20.219	21.987	28.913	2334.62	6200.3	1395.27	6398.82
37	2881	7797.19	2126.05	8171.77	2032	1740.46	2000.53	1891.91	26.97	92.143	156.925	220.756	26.963	20.115	22.014	28.972	849	6056.73	125.525	6279.85
38	2807	6754.02	2976.47	6378.82	1694.5	2102.66	1539.08	2195.88	27.015	92.198	157.075	220.833	26.99	20.235	22.057	28.93	1112.5	4651.35	1437.39	4182.94
39	2533	5792.17	3457.14	6116.47	1510	1885.92	1628.78	2214.26	27.044	92.258	157.086	220.837	27.359	20.226	22.041	28.993	1023	3906.25	1828.36	3902.21
40	3359	4381.53	2281.51	4884.71	2179.62	1993.1	2075.32	1871.32	26.88	92.012	157.207	221.038	26.796	20.107	22.164	28.9	1179.38	2388.43	206.197	3013.38
41	4677	6169.68	2655.46	6180	1554.62	1883.16	2353.78	1969.56	27.021	92.323	157.081	220.925	26.954	20.315	22.151	28.7	3122.38	4286.52	301.681	4210.44
42	2900	5441.77	2665.55	6711.77	2302.12	2142.19	1821.74	2144.71	27.16	92.222	156.914	220.579	26.874	20.046	21.915	28.813	597.875	3299.57	843.803	4567.06
43	4927	7196.79	3522.69	6854.12	1683.38	1969.38	2229.41	2439.41	27.381	92.002	157.231	220.898	27.061	20.216	21.956	28.946	3243.62	5227.41	1293.28	4414.71
44	2576	9388.55	5690.76	10856.5	1665.12	2168.05	2196.11	2105.74	27.066	92.199	157.115	220.707	27.298	20.239	22.278	28.979	910.875	7220.51	3494.64	8750.74
45	3426	4346.39	3397.48	7470.59	1552.75	2577.94	1745.8	2119.71	26.957	92.235	157.109	220.916	26.965	20.239	21.906	29.071	1873.25	1768.45	1651.68	5350.88
46	2279	6891.57	3830.25	8642.35	1473.25	2125.5	1824.58	1840.88	26.808	92.081	156.96	220.831	26.942	20.241	22.387	28.887	805.75	4766.06	2005.67	6801.47
47	3270	6829.32	4406.72	4202.35	2179.12	2462.47	1679.94	1905	27.003	92.274	157.036	220.907	27.186	20.059	22.236	28.926	1090.88	4366.84	2726.79	2297.35
48	2658	5276.1	3704.2	5500	1995.88	1518.7	1759.87	2074.12	26.964	92.197	157.131	220.774	27.022	20.133	22.157	28.927	662.125	3757.41	1944.33	3425.88
49	2850	7854.42	2161.34	5692.94	1955.75	2081.83	1560.19	2276.76	27.132	92.352	157.28	220.593	27.063	19.946	22.087	28.905	894.25	5772.59	601.155	3416.18
50	4585	7351.41	4403.36	11303.5	1290	2042.67	1435.61	2125.59	27.156	92.393	157.043	221.057	26.789	20.311	21.812	28.913	3295	5308.73	2967.75	9177.94
51	2606	5331.32	3166.39	4707.06	1532.5	2015.19	1637.71	2085.88	27.099	92.228	157.024	220.829	26.757	19.738	22.207	28.757	1073.5	3316.14	1528.68	2621.18
52	5519	5777.11	2014.29	8575.29	1561.12	2187	1752.1	1817.35	26.987	92.336	156.974	220.718	26.833	20.197	22.032	29.211	3957.88	3590.11	262.185	6757.94
53	2794	8220.88	5094.12	7455.29	2151.25	2157.51	2187.61	1606.77	27.073	92.291	157.136	221.002	27.186	20.315	22.21	28.961	642.75	6063.38	2906.51	5848.53
54	1980	4147.59	4658.82	3445.88	1949.12	1827.31	1731.2	2042.21	27.172	92.117	156.918	221.154	27.077	19.976	22.023	29.065	30.875	2320.28	2927.63	1403.68
55	2255	9852.41	3613.45	8642.35	1459.12	1972.52	1938.13	1766.91	27.119	92.312	156.901	220.995	26.979	20.235	22.361	28.724	795.875	7879.9	1675.32	6875.44
56	3723	7556.23	4489.92	7301.18	1638.38	2454.44	2193.49	1805.73	27.087	92.269	156.81	220.84	26.802	20.012	22.124	28.676	2084.62	5101.78	2296.43	5495.44
57	2863	5405.62	3054.62	6481.18	1580.12	1610.69	1954.52	1785.88	27.071	92.239	157.01	220.903	27.007	20.335	21.999	28.938	1282.88	3794.93	1100.11	4695.29
58	1786	5272.09	2581.51	5523.53	1738.25	2425.58	1630.67	1517.35	26.83	92.245	157.036	220.773	27.139	19.851	21.929	28.8	47.75	2846.51	950.84	4006.18
59	976	4512.05	2128.57	4578.82	1866.62	1991.09	1639.6	1871.47	27.006	92.159	157.031	220.765	27.022	20.23	22.043	29.115	-890.624	2520.96	488.971	2707.35
60	2541	5265.06	4300	6062.35	1710.12	2039.91	1727.21	1748.97	27.137	92.357	157.26	220.704	27.087	19.87	21.837	28.966	830.875	3225.15	2572.79	4313.38
61	4520	7188.76	3064.71	6878.82	2257.62	2145.96	2049.26	1654.12	27.029	92.271	156.936	220.888	26.989	20.346	22.114	28.961	2262.38	5042.8	1015.44	5224.71
62	1904	6538.15	5384.03	6463.53	2190.62	2137.68	1889.18	1635.73	26.684	92.131	157.055	220.816	26.979	20.216	22.228	28.875	-286.624	4400.48	3494.85	4827.79
63	3950	8387.55	4857.14	7409.41	1500.12	2251.63	1955.78	2371.18	26.95	92.133	157.041	220.708	26.802	20.222	22.261	28.91	2449.88	6135.92	2901.37	5038.23
64	2809	10937.8	3183.19	9480	1463.5	2110.82	1799.89	2263.38	27.008	92.384	156.947	220.796	26.802	20.134	21.955	28.77	1345.5	8826.93	1383.3	7216.62
65	4562	10961.8	5313.44	7638.82	1928	2317.52	2045.59	2145.15	27.07	92.227	157.122	221.006	27.022	20.21	21.999	28.799	2634	8644.33	3267.86	5493.68
66	5699	6768.07	2026.89	6704.71	2095.88	2293.3	1982.56	2225.74	27.02	92.169	157.208	220.784	27.018	20.4	22.14	28.814	3603.12	4474.77	44.328	4478.97
67	3947	4634.54	3219.33	8089.41	1753.25	2097.51	2065.13	2382.35	27.235	92.332	157.172	220.857	27.028	20.227	22.033	28.865	2193.75	2537.02	1154.2	5707.06
68	4582	6265.06	2991.6	8017.65	1738	2088.6	1625.53	2158.97	26.955	92.198	157.071	220.762	26.776	20.047	22.006	28.849	2844	4176.46	1366.07	5858.68
69	6547	6961.85	5494.12	7781.18	2255.38	1862.2	1570.59	1514.27	26.964	92.297	157.013	220.795	26.9	20.168	22.061	28.905	4291.62	5099.65	3923.53	6266.91
70	2984	4819.28	4272.27	5640	1557.38	2125.38	2288.76	1606.77	26.963	92.356	156.865	220.988	26.921	20.138	22.242	28.984	1426.62	2693.9	1983.51	4033.24
71	2237	8175.7	1574.79	8705.88	1785.75	1354.42	1718.38	2326.47	27.024	92.096	157.342	220.897	27.169	20.138	22.115	29.091	451.25	6821.28	-143.591	6379.41
72	2513	6491.97	2091.6	4145.88	2066.62	2114.46	1968.7	1947.79	27.122	92.039	157.301	220.838	26.845	20.219	21.575	28.801	446.375	4377.51	122.899	2198.09
73	1800	4723.9	3195.8	5163.53	1993.88	2150.23	1586.35	2414.41	26.958	92.168	157.189	220.883	26.985	20.017	22.273	28.833	-193.874	2573.67	1609.45	2749.12
74	3043	4700.8	2231.93	8398.82	1678.38	1582.45	1878.15	1870.44	27.07	92.13	157.181	220.738	27.1	19.959	22.203	28.869	1364.62	3118.35	353.782	6528.38
75	3498	7209.84	3612.61	6758.82	1624.88	1885.04	2068.91	1797.35	27.181	92.235	157.129	220.85	26.889	20.058	22.225	28.948	1873.12	5324.8	1543.7	4961.47
76	3696	8155.62	2000.84	14396.5	1661.88	1784.39	2183.72	1733.82	27.001	91.889	157.141	220.962	27.166	20.166	22.225	28.837	2034.12	6371.23	-182.877	12662.6
77	2723	7089.36	3332.77	9745.88	1642.25	2069.4	1971.64	2106.03	26.913	92.075	157.021	220.944	26.83	20.255	22.092	28.842	1080.75	5019.95	1361.13	7639.85
78	4505	4395.58	2773.95	5488.23	1806.38	1704.32	1930.78	2423.38	26.821	92.176	156.832	220.707	27.036	20.081	22.151	28.751	2698.62	2691.26	843.172	3064.85
79	2029	6735.94	1819.33	7615.29	1903.25	2377.76	1717.96	1650.15	27.09	92.165	156.827	220.942	27.059	19.791	21.996	28.821	125.75	4358.18	101.366	5965.15
80	3098	5966.87	3010.08	7557.65	1776.62	2144.45	1844.75	2151.03	27.029	92.302	157.202	220.704	27.023	20.175	21.957	28.716	1321.38	3822.41	1165.34	5406.62
81	3158	5892.57	3100	9380	2452	1999.5	1933.09	1754.27	27.083	92.079	156.95	220.783	27.02	20.068	22.084	28.861	706	3893.07	1166.91	7625.73
82	3332	5670.68	3057.98	12620	2129.75	2478.66	1536.66	2135.15	27.145	92.15	156.785	220.767	26.86	19.891	22.043	28.959	1202.25	3192.02	1521.32	10484.9
83	2266	8567.27	3616.81	7837.65	2282.25	2507.78	1720.9	2119.12	27.07	92.198	157.188	220.942	26.867	20.26	22.094	28.589	-16.249	6059.49	1895.9	5718.53
84	4131	6799.2	3005.04	7789.41	1765.25	1793.17	1999.37	2282.35	27.06	92.08	157.045	220.736	26.896	20.169	22.109	28.566	2365.75	5006.02	1005.67	5507.06
85	6022	8667.67	3626.89	10789.4	1680.62	1840.36	1595.06	1899.56	27.072	92.22	157.054	220.856	27.176	20.183	22.13	29.058	4341.38	6827.31	2031.83	8889.85
86	3998	6022.09	1133.61	7452.94	2058.38	1662.78	1654.2	2335.44	27.3	92.275	156.952	220.767	26.747	20.247	21.995	29.029	1939.62	4359.31	-520.587	5117.5
87	4240	6591.36	3494.96	7420	1940.38	1890.56	1602.73	2074.26	27.111	92.237	157.136	220.893	26.916	20.11	22.05	28.895	2299.62	4700.8	1892.23	5345.73
88	4208	4278.11	5505.88	5885.88	2626.62	1519.83	1972.16	1587.5	26.93	92.262	156.979	220.954	26.756	19.862	22.221	28.745	1581.38	2758.28	3533.72	4298.38
89	4342	4472.89	4794.12	8381.18	1707.38	1953.31	1700.84	1880.88	27.047	92.068	157.143	220.893	27.048	20.096	22.184	28.908	2634.62	2519.58	3093.28	6500.29
90	5695	5468.88	4170.59	7770.59	1524.5	1823.04	1825	2002.94	26.763	92.282	157.044	220.807	27.025	20.366	22.001	29.156	4170.5	3645.83	2345.59	5767.65
91	3341	10821.3	4557.14	5297.65	2300.88	1855.8	1859.98	2320.74	26.995	92.177	157.17	221.045	26.835	20.443	22.424	29.047	1040.12	8965.49	2697.16	2976.91
92	3708	9559.24	3629.41	10709.4	1619.75	1880.15	1503.68	2678.24	27.077	92.002	156.924	220.878	26.942	20.074	21.735	28.479	2088.25	7679.09	2125.74	8031.18
93	1532	6658.64	2984.87	8157.65	1200.5	1719.38	1553.26	2195.44	27.147	92.167	157.084	220.944	26.852	20.026	22.038	28.796	331.5	4939.26	1431.62	5962.21
94	4117	5219.88	3520.17	3264.71	2369.62	2034.89	1736.97	1450.15	27.112	92.062	156.979	220.769	26.87	20.048	22.242	29.094	1747.38	3184.99	1783.19	1814.56
95	4374	5756.02	3425.21	7331.77	1513.88	1960.97	2223.42	1923.68	26.888	91.911	156.932	220.812	27.038	20.135	22.091	29.017	2860.12	3795.05	1201.79	5408.09
96	2535	9119.48	2795.8	8636.47	1713.25	1766.06	1810.08	2337.5	27.056	92.393	157.128	220.87	26.869	20.143	22.072	28.928	821.75	7353.41	985.714	6298.97
97	3676	8589.36	5314.29	10658.8	1952.75	2287.15	2276.37	1899.41	27.174	92.222	157.042	220.844	27.062	20.036	22.195	28.649	1723.25	6302.21	3037.92	8759.41
98	3072	8432.73	3757.98	2803.53	1929.25	1908.51	1681.93	1875.29	27.063	92.105	157.027	220.954	26.661	20.502	22.167	29.138	1142.75	6524.22	2076.05	928.235
99	1872	6842.37	2573.95	5012.94	1120.62	2395.96	1998.74	2088.53	27.085	92.165	156.955	220.735	26.816	20.282	21.956	29.042	751.375	4446.41	575.21	2924.41
100	4100	5422.69	3237.82	6383.53	1724.75	2079.19	1851.58	1716.77	27.11	92.264	157.15	220.867	26.596	20.18	22.164	28.969	2375.25	3343.5	1386.24	4666.77
101	2029	7252.01	5022.69	9451.76	1855.5	1813	1923.42	2083.24	27.361	92.303	156.98	220.806	27.068	20.153	22.003	28.804	173.5	5439.01	3099.26	7368.53
102	2408	8267.07	2335.29	8231.76	2041.88	2049.45	1353.05	2169.85	26.868	92.155	156.866	220.962	27.191	19.974	22.323	28.654	366.125	6217.62	982.248	6061.91
103	3508	5350.4	3431.09	6395.29	2047.12	1686.5	1625.94	1783.23	27.196	92.248	157.081	220.863	27.074	20.136	22.077	28.956	1460.88	3663.91	1805.15	4612.06
104	3137	5374.5	5357.98	3827.06	1534.25	2199.8	1629.73	1878.53	26.989	92.205	157.133	220.838	26.956	20.243	22.283	29.149	1602.75	3174.7	3728.26	1948.53
105	2996	9909.64	7230.25	3622.35	1794	1508.41	1619.96	2070.15	27.209	92.204	157.095	220.934	26.986	20.181	22.21	29.218	1202	8401.23	5610.29	1552.21
106	6150	7761.04	6299.16	6669.41	1928.5	1842.87	2231.62	2215.88	26.877	92.028	157.147	220.902	27.25	19.833	22.159	28.861	4221.5	5918.17	4067.54	4453.53
107	3616	6445.78	3969.75	6500	1893.38	1952.69	1709.35	1944.12	27.064	92.064	157.19	220.899	26.872	20.099	22.099	29.071	1722.62	4493.1	2260.4	4555.88
108	1830	6222.89	8078.15	4067.06	1696.38	2372.36	1930.67	1506.62	26.799	92.2	156.937	220.748	27.02	20.436	22.317	28.835	133.625	3850.53	6147.48	2560.44
109	3546	6244.98	3952.1	2961.18	2006.38	2028.61	2226.58	2513.38	27.079	92.163	156.876	220.983	26.814	20.036	22.167	28.92	1539.62	4216.36	1725.53	447.794
110	3878	4671.69	6831.93	2921.18	1904.5	2361.32	2025.84	2263.68	27.08	92.19	157.037	221.07	26.876	20.108	22.089	29.062	1973.5	2310.37	4806.09	657.5
111	6441	4099.4	7535.29	3629.41	2186.62	2299.32	1740.86	1885.29	27.063	92.144	156.946	220.963	26.966	20	21.999	28.935	4254.38	1800.08	5794.43	1744.12
112	3893	9122.49	5296.64	4142.35	1875.25	2281.5	1770.17	2098.97	26.964	92.023	157.166	220.745	26.854	20.068	22.135	29.049	2017.75	6840.99	3526.47	2043.38
113	6942	5720.88	7571.43	6502.35	2011.88	2080.95	2181.83	2086.47	27.284	92.18	157.044	220.712	26.808	20.058	22.194	28.829	4930.12	3639.93	5389.6	4415.88
114	7405	8258.03	6963.87	4622.35	1937	1571.29	2232.14	2605.74	27.095	92.251	156.965	220.906	27.018	20.096	22.04	29.036	5468	6686.75	4731.72	2016.62
115	3984	7539.16	9600	2336.47	2664.12	1825.43	2476.05	2215.29	26.924	92.141	156.982	221.183	26.846	20.092	21.954	28.885	1319.88	5713.73	7123.95	121.176
116	5037	7124.5	7491.6	2640	1613.62	1773.22	2180.67	1442.79	27.07	92.194	156.836	220.932	26.818	20.197	22.068	28.803	3423.38	5351.28	5310.92	1197.21
117	4580	5639.56	6226.89	5032.94	1574.75	2045.18	1705.57	1633.82	27.189	91.894	157.084	221.007	27.053	19.898	22.151	28.782	3005.25	3594.38	4521.32	3399.12
118	5190	7507.03	5758.82	2331.76	2096.62	2073.67	1582.67	2054.56	27.037	92.036	156.979	220.998	26.836	20.132	22.169	28.86	3093.38	5433.36	4176.15	277.206
119	5427	4615.46	7874.79	2985.88	2194	2322.16	1623.21	2747.5	26.894	92.171	156.792	220.935	27.266	20.22	22.195	28.97	3233	2293.3	6251.58	238.382
120	4333	6125.5	8833.61	3878.82	2333.88	1464.23	2295.17	2602.35	27.234	92.196	157.217	221.277	26.872	20.08	22.087	28.849	1999.12	4661.27	6538.44	1276.47
121	3345	7191.77	6099.16	2337.65	2152.38	2189.51	2233.3	1490.73	27.041	92.024	157.075	220.844	27.008	20.171	22.26	29.061	1192.62	5002.26	3865.86	846.912
122	6442	6567.27	5902.52	3338.82	1710	1974.52	1928.78	2089.56	27.173	92.111	157.121	220.922	26.939	20.189	22.283	28.947	4732	4592.75	3973.74	1249.27
123	7650	6866.47	8863.87	4770.59	2052.38	1942.52	1771.11	2302.06	27.056	91.94	156.781	221.01	26.864	20.271	22.328	28.905	5597.62	4923.95	7092.75	2468.53
124	4303	6476.91	4898.32	4389.41	2255.12	2363.2	2097.79	1780	27.244	92.02	157.21	221.073	26.876	19.914	22.066	29.029	2047.88	4113.7	2800.53	2609.41
125	4829	4897.59	7847.9	6627.06	2352.12	2086.72	1544.54	1510.29	27.106	92.239	157.05	220.794	27.152	20.156	22.019	28.761	2476.88	2810.87	6303.36	5116.77
126	5700	8514.06	3917.65	4395.29	1829.12	1782.76	1962.18	2107.35	27.152	92.241	157.241	220.704	26.838	19.789	22.094	29.152	3870.88	6731.3	1955.46	2287.94
127	5287	6534.14	8721.01	4357.65	2050.75	1852.16	2154.31	1781.62	27.156	92.141	157.01	221.189	26.797	20.258	22.22	29.058	3236.25	4681.98	6566.7	2576.03
128	3503	5660.64	8094.96	4200	1775.12	2176.96	1608.61	2389.26	27.046	92.058	157.084	221.103	26.891	20.089	22.224	28.949	1727.88	3483.68	6486.35	1810.73
129	4314	8213.85	6421.01	2838.82	1412	1927.21	1639.6	2510.15	26.937	92.138	157.171	221.029	27.164	20.258	22.07	28.942	2902	6286.65	4781.41	328.676
130	6702	10649.6	6254.62	9077.65	1928.5	2325.3	1659.56	1807.35	27.297	92.15	157.149	220.957	27.187	20	22.036	28.7	4773.5	8324.3	4595.06	7270.29
131	4139	6839.36	7645.38	6245.88	1879.75	2048.44	2254.73	2115	27.116	92.278	157.28	220.887	27	20.227	22.216	28.909	2259.25	4790.91	5390.65	4130.88
132	5482	5500	6161.35	7370.59	2288.12	2038.15	1471.22	1740.88	27.404	92.07	157.138	221.031	26.943	20.21	22.138	28.967	3193.88	3461.85	4690.13	5629.71
133	4609	7056.23	7361.35	2510.59	2016.75	2354.67	1887.82	1726.03	27.107	92.127	157.084	221.03	26.867	20.347	22.263	28.913	2592.25	4701.56	5473.53	784.559
134	3659	8721.89	6440.34	1532.94	2167.5	2002.26	1862.61	1942.94	26.992	92.171	157.02	220.977	26.735	19.89	21.975	28.992	1491.5	6719.63	4577.73	-409.999
135	3059	7015.06	6458.82	4502.35	1793.75	2004.02	2183.51	2029.71	27.433	91.91	157.119	220.921	26.781	20.151	22.158	29.128	1265.25	5011.04	4275.31	2472.65
136	3431	4764.06	6143.7	2065.88	1793.25	1593	2465.76	1536.62	27.341	91.984	157.065	221.039	27.036	20.093	22.079	28.672	1637.75	3171.06	3677.94	529.265
137	4009	7704.82	7005.04	3545.88	1881.25	1834.09	1997.06	1873.09	27.28	91.927	156.951	221.085	27.184	20.314	22.318	29.005	2127.75	5870.73	5007.98	1672.79
138	3654	5801.2	6207.56	2750.59	1689.62	2111.07	2174.16	1928.09	27.332	92.115	157.155	221.208	26.577	20.124	21.867	29.006	1964.38	3690.14	4033.4	822.5
139	4953	6090.36	8384.87	2207.06	2025.38	2502.13	1901.37	2406.62	27.111	91.891	157.14	220.862	26.849	19.956	22.063	29.159	2927.62	3588.23	6483.51	-199.558
140	4926	5783.13	5053.78	6044.71	1797.75	2095.26	1971.95	2081.18	26.891	92.206	157.071	220.984	26.964	19.989	22.115	29.056	3128.25	3687.88	3081.83	3963.53
141	3865	7486.95	4530.25	5864.71	1992.88	2292.17	1819.43	2044.41	27.118	91.995	157.019	221.037	26.885	20.1	22.202	28.775	1872.12	5194.78	2710.82	3820.29
142	4075	6767.07	3070.59	8588.24	1827.75	2296.81	2088.66	2049.71	26.913	92.225	157.085	220.943	26.859	20.105	21.742	28.82	2247.25	4470.26	981.933	6538.53
143	2920	8145.58	6514.29	4041.18	2284.38	1780.25	1759.03	3008.82	26.985	92.357	157.362	220.843	27.104	20.031	22.12	28.811	635.625	6365.34	4755.25	1032.35
144	3388	5357.43	3744.54	5031.77	2037	1579.32	1720.59	1879.85	26.73	92.094	157.166	220.901	26.622	19.917	22.227	28.971	1351	3778.11	2023.95	3151.91
145	4239	4805.22	4494.96	4192.94	1324.25	2625.63	1789.71	1977.06	27.013	92.042	157.089	220.954	27.078	20.104	22.071	28.896	2914.75	2179.59	2705.25	2215.88
146	3512	6984.94	9251.26	3703.53	1760	2561.62	2241.6	1725	27.149	91.877	157.041	220.924	27.025	20.265	22.361	28.542	1752	4423.32	7009.66	1978.53
147	6250	11099.4	2946.22	8904.71	1976.88	2240.21	1452.21	1814.71	27.259	92.173	157.138	220.864	26.99	20.166	22.027	28.815	4273.12	8859.19	1494.01	7090
148	3793	10531.1	4520.17	9770.59	1850.38	1672.06	1527	1902.94	27.116	92.271	157.141	220.963	26.873	20.041	22.226	28.771	1942.62	8859.06	2993.17	7867.65
149	2559	9658.64	5543.7	11554.1	1667.62	1797.44	2118.07	1870.15	27.322	92.339	156.908	220.779	27.076	20.172	21.997	28.635	891.375	7861.19	3425.63	9683.97
150	4067	9673.69	4730.25	10170.6	1574.75	1958.71	1700.94	1483.68	26.961	92.202	157.06	220.721	26.914	20.07	22.192	28.977	2492.25	7714.98	3029.31	8686.91
151	6085	7829.32	5110.92	8272.94	2070.12	1506.9	1657.46	1793.23	27.038	92.337	157.192	221.02	26.704	20.194	22.424	29.021	4014.88	6322.41	3453.47	6479.71
152	4352	9140.56	2714.29	11440	2165.5	1663.15	1852.31	2446.03	26.957	92.208	157.086	220.842	26.791	20.039	22.272	28.769	2186.5	7477.41	861.975	8993.97
153	6721	9509.04	1957.14	14791.8	2152.62	1954.82	1850.32	2376.76	27.114	92.358	156.897	220.822	26.846	20.127	22.248	28.766	4568.38	7554.22	106.828	12415
154	5709	7395.58	1768.07	12347.1	2159.12	1670.93	1981.09	2222.79	26.994	92.317	157.24	220.837	26.871	20.178	22.032	28.85	3549.88	5724.65	-213.024	10124.3
155	5302	8361.45	3430.25	12350.6	2167.12	2411.27	1524.37	1828.82	27.15	92.167	156.711	220.781	26.964	20.112	21.865	28.91	3134.88	5950.18	1905.88	10521.8
156	8805	6439.76	1323.53	13416.5	2004.12	1893.32	1664.39	1930.29	26.863	92.366	157.036	220.911	27.375	20.384	21.877	29.069	6800.88	4546.44	-340.86	11486.2
157	6643	7635.54	3602.52	10640	1728.25	1997.11	1721.11	2168.24	27.257	92.122	156.946	220.815	26.939	20.128	21.974	28.755	4914.75	5638.43	1881.41	8471.76
158	5399	8821.28	2021.85	10977.6	1385.38	1648.97	1519.22	2542.21	26.907	92.203	156.772	220.91	26.875	19.985	22.036	28.692	4013.62	7172.31	502.626	8435.44
159	5385	5474.9	2178.99	10162.4	1531.12	2458.46	2021.53	2354.71	27.078	92.13	157.123	220.862	26.778	20.178	22.227	28.882	3853.88	3016.44	157.458	7807.65
160	5105	7706.83	2181.51	9301.18	1900	1952.43	1778.36	1876.62	26.975	92.355	156.925	220.905	26.934	20.103	22.045	29.089	3205	5754.39	403.151	7424.56
161	8367	4153.61	2929.41	9941.18	1666.5	2145.33	2011.56	1816.47	27.059	92.145	157.154	220.925	26.864	20.167	22.027	28.855	6700.5	2008.28	917.857	8124.71
162	6626	5110.44	2132.77	9303.53	1689.88	1658.89	1940.86	2188.09	27.057	92.334	156.874	220.888	26.689	20.136	21.99	28.68	4936.12	3451.56	191.912	7115.44
163	5613	9434.74	2272.27	8816.47	1636.38	1338.73	1557.35	1962.21	27.179	92.242	157.142	220.938	26.635	19.947	22.166	28.735	3976.62	8096.01	714.916	6854.27
164	4701	5639.56	2772.27	13308.2	1982.75	1691.64	1833.09	2134.85	27.149	92.141	157.243	220.932	26.959	20.091	21.967	28.717	2718.25	3947.92	939.181	11173.4
165	6932	4385.54	3226.05	15787.1	1967.62	2141.94	1660.5	1639.56	26.981	92.095	157.099	220.901	26.84	20.297	21.758	29.105	4964.38	2243.6	1565.55	14147.5
166	6066	7540.16	2911.76	12824.7	1543.5	1718.25	1981.41	2423.97	27.05	92.432	156.697	220.95	26.819	20.209	22.208	29.065	4522.5	5821.91	930.357	10400.7
167	8263	7284.14	1901.68	10612.9	1984	2253.26	1805.88	2547.35	27.069	92.174	157.163	220.832	26.719	20.042	21.803	28.755	6279	5030.87	95.798	8065.59
168	5272	5902.61	1671.43	9470.59	1779.25	1960.34	1907.35	2375	27.078	92.303	156.764	220.849	26.993	20.434	22.288	29.176	3492.75	3942.27	-235.923	7095.59
169	6623	5636.55	2278.15	13669.4	1953.88	2336.85	2059.35	2181.03	27.218	92.308	156.874	220.887	26.887	20.294	21.945	28.859	4669.12	3299.7	218.803	11488.4
170	7747	10385.5	2741.18	8838.82	1866.5	1762.8	2080.46	2336.47	26.984	92.218	157.11	220.869	26.599	20.253	22.089	28.682	5880.5	8622.74	660.714	6502.35
171	7934	5244.98	2034.45	17424.7	2040.75	1991.59	1631.93	1286.47	27.113	92.455	156.808	220.748	26.924	19.988	22.079	28.822	5893.25	3253.39	402.521	16138.2
172	5390	5958.84	2922.69	10705.9	1627.25	1640.56	1538.87	1537.65	27.248	92.238	157.145	220.915	26.626	20.056	22.125	28.859	3762.75	4318.27	1383.82	9168.24
173	4816	8260.04	2193.28	11175.3	1786	1871.99	1837.82	1710.59	27.018	92.433	157.181	220.826	26.868	20.013	22.166	28.742	3030	6388.05	355.462	9464.71
174	8146	7221.89	794.118	9849.41	1807.62	1825.8	1751.47	1847.94	27.094	92.367	157.016	220.948	26.892	20.282	21.892	28.909	6338.38	5396.08	-957.352	8001.47
175	8185	7949.8	3696.64	12147.1	1516.12	2345.13	1940.23	1568.53	27.085	92.278	156.933	220.758	27.117	20.274	22.154	28.983	6668.88	5604.67	1756.41	10578.5
176	4694	7472.89	4416.81	13061.2	2155.38	1900.85	1666.07	1256.77	27.318	92.274	157.348	220.928	26.856	20.115	21.916	28.904	2538.62	5572.04	2750.74	11804.4
177	5513	8260.04	4658.82	9118.82	1784.25	2170.81	2101.37	2063.97	27.218	92.368	157.077	220.784	26.784	20.408	22.165	28.74	3728.75	6089.23	2557.46	7054.85
178	4652	8596.39	7419.33	9803.53	1941.62	1640.69	1192.54	2636.18	27.257	92.187	156.926	220.815	26.815	20.179	22.057	28.819	2710.38	6955.7	6226.79	7167.35
179	5951	7388.55	2281.51	14104.7	2195.75	2055.35	1571.95	1855.44	26.981	92.44	157.036	220.919	27.001	20.106	21.825	28.902	3755.25	5333.21	709.559	12249.3
180	7173	7425.7	3252.94	12991.8	1984.88	2001.76	1953.36	2200.74	27.138	92.205	157.248	220.774	26.872	19.984	22.022	28.848	5188.12	5423.95	1299.58	10791
181	5242	7203.81	2425.21	11600	2154.5	2059.99	1724.06	2014.85	27.138	92.122	157.017	220.699	26.988	20.168	21.943	28.744	3087.5	5143.82	701.155	9585.15
182	5692	7798.19	1745.38	12438.8	1564	1673.07	1545.8	1802.35	27.003	92.295	157.029	220.938	26.71	19.911	22.117	28.967	4128	6125.13	199.58	10636.5
183	4332	5640.56	1768.91	13694.1	2146.25	1942.9	1532.04	2465.29	27.041	92.397	157.017	220.879	26.838	20.096	21.812	28.997	2185.75	3697.67	236.87	11228.8
184	5837	6382.53	3342.86	12364.7	1871.62	1747.87	1844.22	1950.29	27.171	92.279	156.999	220.824	26.968	20.329	22.223	28.971	3965.38	4634.66	1498.63	10414.4
185	6119	5763.05	1897.48	16762.4	1967.88	2008.28	1922.16	2218.97	27.124	92.142	157.018	220.815	26.89	20.022	21.955	28.764	4151.12	3754.77	-24.684	14543.4
186	6392	6813.25	2137.82	7538.82	2010.12	2056.98	1638.03	1794.56	27.029	92.056	157.263	220.908	26.675	20.049	21.788	28.716	4381.88	4756.27	499.79	5744.27
187	5753	4692.77	1994.96	15537.6	1816	1719.88	1709.14	1990	27.097	92.136	156.877	220.802	26.885	20.343	21.809	28.962	3937	2972.89	285.819	13547.6
188	6240	9187.75	804.202	11369.4	1966.75	1811.24	2294.12	1708.82	26.975	92.351	156.855	220.913	26.984	20.193	22.117	28.644	4273.25	7376.51	-1489.91	9660.59
189	7372	7568.27	2243.7	14096.5	1862.62	1703.94	1758.19	2308.97	27.164	92.296	157.244	220.994	26.953	20.236	22.221	28.884	5509.38	5864.33	485.504	11787.5
190	4758	5787.15	2184.03	11469.4	2026.25	1762.3	1965.02	2038.97	27.072	92.129	156.739	220.955	26.964	20.185	21.816	29	2731.75	4024.85	219.013	9430.44
191	5264	4427.71	2657.14	10987.1	1645.5	1576.05	1667.02	1932.06	27.034	92.272	156.933	220.712	26.869	20.124	21.838	28.866	3618.5	2851.66	990.126	9055
192	9930	7730.92	1828.57	13102.4	1609.12	1872.62	1741.07	2401.76	26.86	92.323	157.208	220.77	26.919	20.142	22.283	28.896	8320.88	5858.31	87.5	10700.6
193	5454	7177.71	1979.83	14168.2	2091.62	1824.92	2080.25	1052.5	27.055	92.225	157.364	220.816	26.995	20.338	21.876	29.15	3362.38	5352.79	-100.419	13115.7
194	3440	10263.1	4951.26	9523.53	1952.12	1941.27	1736.77	2232.79	26.952	92.161	157.15	220.91	27.12	20.058	22.242	28.778	1487.88	8321.79	3214.5	7290.73
195	5740	8975.9	3398.32	10894.1	2021	1913.53	2205.36	2700	26.994	91.985	156.921	220.855	26.921	20.078	21.954	29.017	3719	7062.37	1192.96	8194.12
196	8412	7061.24	3390.76	12494.1	1559.75	2073.54	1829.31	1916.47	27.129	92.212	157.174	220.701	26.817	19.949	22.205	28.836	6852.25	4987.7	1561.45	10577.6
197	6445	8601.41	1705.04	13976.5	2078.88	2157.38	1721.32	1846.18	26.889	92.181	157.069	220.764	26.85	20.111	21.968	28.794	4366.12	6444.03	-16.281	12130.3
198	5859	6758.03	3006.72	13522.4	1617.12	1743.47	1349.47	1771.32	27.214	92.265	157.263	220.953	26.945	20.33	22.005	28.776	4241.88	5014.56	1657.25	11751
199	5861	8625.5	4648.74	9895.29	1446.88	1655.37	1500.63	2013.97	27.075	92.326	157.139	220.899	26.957	20.008	22.149	28.814	4414.12	6970.13	3148.11	7881.32
200	5049	8543.17	2376.47	7130.59	2109.88	1985.44	1624.16	2047.06	26.884	91.951	157.227	220.802	26.958	20.101	21.992	28.706	2939.12	6557.73	752.311	5083.53
201	6180	8115.46	3868.07	10821.2	1867.12	1735.94	1820.69	2079.71	27.178	92.226	157.157	220.77	26.875	19.921	22.121	28.89	4312.88	6379.52	2047.37	8741.47
202	5219	6289.16	3243.7	11043.5	1577.25	1879.89	1886.03	1494.27	27.133	92.197	157.045	220.995	26.942	20.189	22.013	28.766	3641.75	4409.26	1357.67	9549.26
203	3049	7870.48	2070.59	6552.94	1566.5	2401.98	1798.63	1669.56	27.06	92.203	157.189	220.726	27.029	20.218	22.217	28.975	1482.5	5468.5	271.954	4883.38
204	5381	7643.57	5753.78	4101.18	1738.75	1507.4	1950	1834.71	27.279	92.035	157.067	220.862	26.96	20.071	22.075	28.872	3642.25	6136.17	3803.78	2266.47
205	3535	5566.27	3568.91	8214.12	2277.62	2107.43	1228.05	1677.06	26.997	92.147	157.115	220.969	27.077	20.171	22.121	28.696	1257.38	3458.84	2340.86	6537.06
206	2967	5876.51	3141.18	8850.59	1821	1589.11	1637.29	2213.53	27.127	92.282	157.032	221.007	27.055	20.192	22.173	28.923	1146	4287.4	1503.89	6637.06
207	3479	8578.31	4023.53	7524.71	1949	2095.13	1681.93	1628.09	26.963	92.272	157.008	220.808	26.785	20.138	22.352	29.001	1530	6483.18	2341.6	5896.62
208	3901	6464.86	4026.89	11645.9	2066.5	1525.1	1796.11	1822.35	27.166	92.218	157.141	220.941	26.926	20.043	22.189	28.891	1834.5	4939.76	2230.78	9823.53
209	3067	7934.74	3644.54	8496.47	1804	2106.3	2263.87	2073.24	27.114	92.122	156.919	220.801	26.901	20.131	22.078	28.96	1263	5828.44	1380.67	6423.23
210	4121	7279.12	4960.5	9951.76	1720.62	1812.88	1695.48	2012.06	27.267	92.348	157.357	220.62	27.046	20.084	21.964	28.766	2400.38	5466.24	3265.02	7939.71
211	3089	8907.63	3555.46	10578.8	1713.5	1969.25	1533.61	1505.44	26.889	92.257	156.981	220.828	26.723	20.355	21.832	28.764	1375.5	6938.38	2021.85	9073.38
212	5956	7297.19	2005.04	17071.8	1683.5	1913.4	1931.62	1689.41	26.972	92.518	156.895	220.891	26.851	20.213	22.277	28.929	4272.5	5383.78	73.424	15382.4
213	5268	6334.34	3668.07	7975.29	1961.38	1742.6	1894.01	2559.71	27.053	92.296	156.922	220.742	26.998	20.237	21.902	28.851	3306.62	4591.74	1774.06	5415.59
214	4196	11098.4	4355.46	11818.8	1768.88	2135.79	1741.18	2581.32	27.089	92.164	156.95	221.07	26.793	19.952	22.172	28.778	2427.12	8962.6	2614.29	9237.5
215	4484	7720.88	5776.47	5132.94	1790.62	1976.53	1627.84	2251.62	27.236	92.185	157.039	220.778	26.83	20.253	22.022	29.034	2693.38	5744.35	4148.63	2881.32
216	2004	5708.84	2066.39	10563.5	1921.75	2130.52	1618.8	1673.82	26.92	92.303	157.023	220.856	27.102	20.143	22.114	28.969	82.25	3578.31	447.584	8889.71
217	3351	8852.41	4352.1	9575.29	1745.88	1307.86	1824.06	1915.44	26.911	92.33	157.182	220.813	27.094	20.103	22.005	29.015	1605.12	7544.55	2528.05	7659.85
218	1755	11424.7	4631.93	10820	1605.88	2035.39	1524.16	1539.85	27.159	92.39	157.264	220.807	26.711	20.3	22.144	28.983	149.125	9389.31	3107.77	9280.15
219	2783	9273.09	4565.55	10990.6	2054	1866.72	1821.85	2202.06	26.967	92.201	156.957	220.701	26.915	19.953	22.257	28.868	729	7406.38	2743.7	8788.53
220	4171	9071.28	3591.6	6812.94	2191.88	1994.98	1823.53	1757.65	26.926	92.278	157.231	220.872	26.882	20.097	22.051	28.79	1979.12	7076.31	1768.07	5055.29
221	4993	8845.38	3535.29	9385.88	1444	2417.67	1763.13	2258.09	27.131	92.226	157.119	220.904	26.822	20.328	22.283	28.928	3549	6427.71	1772.16	7127.79
222	3818	7560.24	6420.17	9842.35	1911.88	1785.14	2047.06	1512.06	27.196	92.271	157.314	220.845	26.779	19.979	22.093	28.78	1906.12	5775.1	4373.11	8330.29
223	3469	7823.29	2888.24	6938.82	1619	1980.05	1929.73	2477.21	27.247	92.284	157.074	220.976	26.991	20.175	22.13	28.91	1850	5843.25	958.508	4461.62
224	5748	6381.53	3248.74	6720	2093.75	1441.77	1733.72	2812.94	26.846	92.287	157.008	220.953	27.007	20.107	22.168	28.736	3654.25	4939.76	1515.02	3907.06
225	5341	8543.17	3799.16	8496.47	2346.62	2266.82	1631.2	1100.15	27.208	92.137	156.955	220.645	26.79	20.264	22.209	28.868	2994.38	6276.35	2167.96	7396.32
226	4596	7830.32	5240.34	9991.76	1550.12	2161.14	1469.54	2148.24	27.206	92.159	157.116	220.894	27.084	20.335	22.336	28.815	3045.88	5669.18	3770.8	7843.53
227	2993	8258.03	3636.97	10591.8	1599.75	2445.03	1343.17	1903.97	27.079	92.233	156.923	220.805	26.779	20.181	21.83	28.82	1393.25	5813	2293.8	8687.79
228	2778	7515.06	5225.21	10300	1923.5	2076.68	1885.61	1756.32	27.072	92.229	157.139	220.659	26.635	20.022	22.246	28.602	854.5	5438.38	3339.6	8543.68
229	6325	7781.12	3763.87	12309.4	2113.12	2483.56	1442.23	2283.97	27.111	92.303	156.937	220.618	27.018	20.131	22.008	28.628	4211.88	5297.56	2321.64	10025.4
230	4738	6377.51	1781.51	9802.35	1712	1937.75	2086.03	1616.32	26.88	92.146	157.078	220.838	26.731	20.035	22.146	28.805	3026	4439.76	-304.516	8186.03
231	7848	4687.75	2200	13330.6	1296.75	2551.46	1777.73	2006.91	26.974	92.01	157.069	220.7	27.045	20.099	22.223	28.922	6551.25	2136.3	422.269	11323.7
232	9504	6131.53	3027.73	14164.7	2027.75	1880.4	1825.63	2689.26	27.12	92.136	156.952	220.808	26.847	19.933	22.176	28.79	7476.25	4251.13	1202.1	11475.4
233	5539	8516.06	1278.15	14201.2	1255.12	2038.28	1799.06	2166.76	26.993	92.141	157.103	220.911	26.771	20.018	22.094	28.686	4283.88	6477.79	-520.902	12034.4
234	2638	11665.7	2791.6	12189.4	1854.88	2268.82	1684.66	2062.5	26.927	92.251	156.975	220.633	26.883	20.369	22.332	28.67	783.125	9396.84	1106.93	10126.9
235	7586	7096.39	3041.18	13274.1	1489.62	2098.02	1468.59	1795.73	27.36	92.371	157.035	220.746	26.806	20.29	22.032	28.832	6096.38	4998.37	1572.58	11478.4
236	4794	6231.93	4039.5	11677.6	1731.25	2490.96	1654.1	1966.91	26.93	92.188	157.181	220.659	26.894	19.955	21.91	28.958	3062.75	3740.96	2385.4	9710.74
237	8422	10157.6	3108.4	8710.59	2197.62	1274.85	1861.66	1839.56	26.881	92.301	156.956	220.798	27.104	19.916	21.945	28.823	6224.38	8882.78	1246.74	6871.03
238	8844	5765.06	1537.82	13152.9	1911.38	1448.8	1776.15	1662.94	27.067	92.06	156.697	220.799	26.815	20.123	22.078	28.849	6932.62	4316.27	-238.339	11490
239	7247	6011.04	3953.78	12075.3	1542.75	1369.35	1815.55	2219.41	27.143	92.198	157.072	220.92	27.201	20.117	21.947	28.936	5704.25	4641.69	2138.24	9855.88
240	4220	7493.98	5999.16	4816.47	2012.88	1507.03	2067.96	1924.41	27.346	92.4	157.017	220.862	26.805	20.285	22.447	29.003	2207.12	5986.95	3931.2	2892.06
241	3248	6419.68	7610.08	1875.29	1680.62	1812.5	1843.8	1581.03	27.034	92.282	157.04	221.226	26.793	20.181	22.126	29.013	1567.38	4607.18	5766.28	294.265
242	2754	8125.5	6984.87	5867.06	1522	2771.08	2163.13	1485.29	27.135	92.357	157.152	220.645	26.826	20.032	22.19	28.726	1232	5354.42	4821.74	4381.77
243	3984	3638.55	7147.06	1297.65	1796.75	1869.85	1731.41	1682.94	27.264	91.974	157.101	220.961	26.962	20.195	22.159	29.067	2187.25	1768.7	5415.65	-385.293
244	4436	4979.92	6210.08	2777.65	1683.25	1968.5	1421.01	1707.94	26.832	92.398	157.298	220.879	27.051	20.324	22.283	29.163	2752.75	3011.42	4789.08	1069.71
245	5745	6740.96	4290.76	2164.71	1909	1886.67	2240.34	1812.79	27.06	92.316	156.979	220.938	26.847	20.268	22.222	28.734	3836	4854.29	2050.42	351.912
246	3461	5935.74	4563.87	3641.18	1545.88	1756.4	1918.59	1568.82	27.331	92.355	156.844	221.13	26.848	19.91	22.098	29.011	1915.12	4179.34	2645.27	2072.35
247	4838	5244.98	4768.07	5257.65	1724.75	1582.08	1557.46	1670.73	27.061	92.42	156.731	220.797	26.928	20.224	22.254	28.931	3113.25	3662.9	3210.61	3586.91
248	3943	8011.04	5468.91	6732.94	1702.25	1996.86	1787.18	1670.29	26.799	92.275	156.957	221.267	26.927	20.095	22.171	28.857	2240.75	6014.18	3681.72	5062.65
249	2856	7644.58	4782.35	5762.35	1873.5	1764.68	1833.93	1758.97	27.059	92.297	157.104	221.11	27.096	20.188	22.23	28.826	982.5	5879.9	2948.42	4003.38
250	2093	7192.77	4276.47	8682.35	2008.25	2025.23	1877.42	1949.71	27.12	92.288	156.944	220.936	26.97	20.225	22.365	28.952	84.75	5167.55	2399.05	6732.65
251	4420	10480.9	4127.73	7889.41	1870.75	1735.57	1913.76	1764.27	27.189	92.496	157.098	220.804	27.133	19.977	22.071	28.84	2549.25	8745.36	2213.97	6125.15
252	6482	11470.9	2563.03	11325.9	1668.38	2114.21	2029.2	1447.79	27.009	92.669	156.962	220.892	26.779	19.987	22.232	28.846	4813.62	9356.68	533.824	9878.09
253	8714	11518.1	3902.52	10400	1582.5	1883.41	1908.82	1846.47	27.163	92.204	157.101	220.698	27.019	20.242	21.964	28.794	7131.5	9634.66	1993.7	8553.53
254	4451	8197.79	5480.67	7891.77	2041.88	2526.98	1962.82	2256.32	27.088	92.089	156.949	220.891	27.082	20.354	22.111	28.926	2409.12	5670.81	3517.86	5635.44
255	4262	6905.62	4883.19	6681.18	1637.38	1756.9	1548.42	1897.79	27.106	92.207	156.968	220.988	26.824	20.138	22.101	28.794	2624.62	5148.72	3334.77	4783.38
256	6988	8944.78	5436.13	5888.23	2278.88	1841.37	1771.53	1618.68	27.098	92.308	157.185	221.034	26.776	20.273	22.162	28.682	4709.12	7103.41	3664.6	4269.56
257	3600	9782.13	6633.61	6472.94	1973.5	1557.35	1814.18	1723.97	26.923	92.138	157.108	221.023	26.821	20.214	21.938	29.119	1626.5	8224.77	4819.43	4748.97
258	3409	10979.9	4905.88	10701.2	1879.75	1856.55	1682.35	2132.5	26.97	92.345	157.233	220.793	27.142	20.249	22.206	28.809	1529.25	9123.37	3223.53	8568.68
259	3974	8619.48	3769.75	6512.94	1701.12	1616.84	1797.48	1635.88	27.186	92.108	157.013	220.782	26.875	20.105	22.257	28.877	2272.88	7002.64	1972.27	4877.06
260	3622	10865.5	4756.3	6401.18	1721.38	2340.11	1465.86	1641.18	27.104	92.353	157.114	220.924	26.923	19.979	22.02	28.948	1900.62	8525.35	3290.44	4760
261	3070	9287.15	6636.13	5627.06	2054.38	2128.01	1718.91	1880.88	26.87	92.292	156.956	220.74	26.983	19.929	22.091	28.753	1015.62	7159.14	4917.23	3746.18
262	2261	9295.18	5401.68	5891.77	1800.38	1889.93	1467.33	1665.15	27.214	92.237	157.355	220.901	26.749	20.104	22.042	28.796	460.625	7405.25	3934.35	4226.62
263	2815	7326.31	4737.81	9950.59	1884.75	1800.33	2024.37	1430.59	27.274	92.103	156.987	220.969	26.923	20.056	22.149	28.741	930.25	5525.98	2713.45	8520
264	3608	10098.4	3727.73	9656.47	2037.12	2351.28	1713.76	1992.79	27.033	92.375	157.272	220.903	26.994	20.15	22.111	29.124	1570.88	7747.11	2013.97	7663.68
265	3705	8099.4	5236.13	6717.65	1945.38	1757.53	1876.37	1719.71	27.109	92.188	156.99	220.76	27.143	20.046	22.063	29.129	1759.62	6341.87	3359.77	4997.94
266	7021	7845.38	1337.82	14024.7	2158	2040.66	1626.26	1974.85	26.924	92.188	156.864	220.716	26.543	20.072	22.156	28.72	4863	5804.72	-288.444	12049.9
267	7487	4751	2287.39	12941.2	1687.38	2171.94	1979.41	2149.41	27.323	92.383	157.043	220.798	26.62	20.25	22.039	29.072	5799.62	2579.07	307.983	10791.8
268	5131	7364.46	5755.46	11227.1	1997.38	2143.2	1734.87	2035.73	27.036	92.149	157.298	220.956	26.818	20.204	22.183	28.788	3133.62	5221.26	4020.59	9191.32
269	6987	4878.51	2314.29	10560	2016.25	2002.64	1719.64	2395.59	27.18	92.205	157.061	220.796	27.01	20.452	22.336	28.681	4970.75	2875.88	594.643	8164.41
270	7115	7578.31	1922.69	12344.7	1883.25	1796.94	1772.58	1299.27	27.117	92.213	156.734	220.8	26.509	20.043	21.985	28.824	5231.75	5781.38	150.105	11045.4
271	7923	7007.03	1519.33	9538.82	1849.62	2329.95	1781.3	2397.21	27.111	92.212	157.141	220.862	26.661	20.217	21.9	29.085	6073.38	4677.08	-261.974	7141.62
272	5033	6673.69	2978.99	13029.4	1629.25	1339.36	1755.15	1743.68	27.305	92.284	157.059	220.797	27.405	20.289	22.373	29.022	3403.75	5334.34	1223.85	11285.7
273	8253	6324.3	1858.82	11417.6	1360.38	1892.7	1217.54	2094.26	27.287	92.488	157.215	220.911	26.75	20.249	22.026	28.822	6892.62	4431.6	641.282	9323.38
274	6500	9542.17	1842.86	12356.5	2182.75	2635.04	1849.47	1812.79	27.192	92.154	157.008	220.844	26.711	20.124	22.057	28.799	4317.25	6907.13	-6.617	10543.7
275	6435	6293.17	2169.75	11204.7	2199.25	2326.56	2016.81	2325.44	27.033	92.132	156.936	220.925	26.856	19.864	22.011	28.824	4235.75	3966.62	152.941	8879.26
276	5612	10167.7	1859.66	9327.06	1669.12	1743.85	1950	2343.38	26.881	92.398	156.978	220.953	27.116	20.173	22.191	28.867	3942.88	8423.82	-90.335	6983.68
277	6305	6072.29	2822.69	13057.6	1354	1991.59	1581.41	2651.62	27.176	92.438	156.859	220.943	27.257	20.249	22.221	29.074	4951	4080.7	1241.28	10406
278	6442	6336.35	2599.16	12662.4	1563.88	1980.42	1271.74	2369.85	27.17	92.169	156.916	220.77	26.976	20.229	21.994	29.021	4878.12	4355.92	1327.42	10292.5
279	7184	6455.82	1744.54	10470.6	1928.25	1914.16	1859.35	2473.53	27.348	92.288	156.982	220.769	26.742	20.152	21.704	28.954	5255.75	4541.67	-114.81	7997.06
280	6728	7185.74	3374.79	9485.88	2146.12	1749	2196.53	1965.73	26.972	92.47	157.035	220.956	26.741	19.958	22.206	28.706	4581.88	5436.75	1178.26	7520.15
281	5557	8654.62	1605.88	13067.1	1522.88	2146.96	1720.69	1937.65	27.157	92.35	156.872	220.915	26.94	20.261	22.254	28.903	4034.12	6507.66	-114.81	11129.4
282	8598	7128.51	2696.64	11742.4	1756.88	1601.78	1519.54	1635.15	27.03	92.449	156.991	220.754	26.853	20.281	22.024	28.992	6841.12	5526.73	1177.1	10107.2
283	6946	7434.74	3813.45	12412.9	1795.62	2200.93	1649.06	1888.53	27.086	92.189	157.241	220.875	26.94	20.289	22.055	28.968	5150.38	5233.81	2164.39	10524.4
284	7787	7611.45	1242.02	12717.6	1483.75	2096.89	2014.29	2126.76	27.097	92.207	157.015	220.814	26.835	19.891	22.236	28.72	6303.25	5514.56	-772.268	10590.9
285	6368	5654.62	2275.63	14524.7	1978.38	2005.77	2061.13	2278.38	27.108	92.096	156.908	220.967	27.033	20.269	21.982	28.769	4389.62	3648.84	214.496	12246.3
286	6131	5472.89	2905.88	14160	1531.5	1999.5	1803.36	2355.59	27.058	92.085	157.081	220.639	27.033	20.247	22.091	29.003	4599.5	3473.39	1102.52	11804.4
287	5725	4162.65	1662.18	13454.1	1934	1840.36	2127.1	2310.29	26.995	92.365	156.988	220.938	26.945	20.179	22.158	28.916	3791	2322.29	-464.915	11143.8
288	6717	7963.85	1497.48	13587.1	2030.12	2150.73	1918.59	2614.85	27.072	92.349	156.891	220.912	26.751	19.992	22.272	28.819	4686.88	5813.13	-421.112	10972.2
289	7187	7413.65	1426.89	14217.6	1861	2084.09	1809.77	2223.68	27.141	92.444	156.953	220.895	26.99	20.022	22.067	28.914	5326	5329.57	-382.877	11994
290	9128	5151.61	3129.41	11110.6	2159.88	2538.28	1427.31	1926.03	27.009	92.096	157.244	220.722	26.906	20.136	22.116	28.948	6968.12	2613.33	1702.1	9184.56
291	7957	7095.38	1978.15	10531.8	1755.75	1715.86	1799.89	2178.97	27.091	92.315	157.068	220.941	26.868	20.246	21.846	28.836	6201.25	5379.52	178.256	8352.79
292	4826	4570.28	2931.09	10757.6	1676.75	2004.77	1464.71	1851.77	26.957	92.306	156.704	220.949	26.838	19.963	22.084	29.109	3149.25	2565.51	1466.39	8905.88
293	3613	7817.27	2126.89	10623.5	1864.88	1455.7	2257.77	2217.35	26.976	92.358	157.128	221.021	27.006	20.105	22.159	28.923	1748.12	6361.57	-130.881	8406.18
294	3837	8497.99	2378.15	12544.7	2381.62	2165.41	1716.6	2319.56	27.003	92.357	156.912	220.901	26.931	20.021	22.127	28.747	1455.38	6332.58	661.555	10225.1
295	5723	8890.56	1672.27	12450.6	1631.5	1708.21	1476.79	2162.79	26.948	92.492	156.966	220.848	27.148	20.192	21.939	29.082	4091.5	7182.35	195.483	10287.8
296	5338	5322.29	3251.26	15503.5	1517.5	1930.1	1653.26	2558.24	27.091	92.255	156.972	220.891	26.869	20.217	21.911	28.738	3820.5	3392.19	1598	12945.3
297	5376	7154.62	3315.97	15707.1	1637.62	2091.36	1692.65	2073.09	26.933	92.275	156.901	220.664	27.064	20.067	22.155	28.843	3738.38	5063.25	1623.32	13634
298	6223	7014.06	2473.11	9596.47	2440.38	1697.54	1478.05	1756.32	27.064	92.335	156.921	220.816	26.69	20.072	22.246	28.758	3782.62	5316.52	995.063	7840.15
299	8210	5893.57	1598.32	9751.76	1878.62	1622.24	1646.22	1571.03	27.171	92.29	156.988	221.051	26.784	19.881	22.012	28.874	6331.38	4271.34	-47.898	8180.73
300	8780	7254.02	2000.84	13016.5	1841.38	1935.99	1695.27	2036.62	26.876	92.232	156.923	221.01	26.96	20.211	22.099	28.862	6938.62	5318.02	305.567	10979.9
301	8995	4279.12	1603.36	17704.7	1583	1940.26	1359.14	1815.73	27.146	92.21	156.765	221.009	26.824	20.419	22.194	28.77	7412	2338.86	244.223	15889
302	5093	6566.27	2656.3	9287.06	2102.38	1762.17	1635.5	2067.35	27.103	92.406	157	220.601	26.852	20.147	22.132	28.983	2990.62	4804.09	1020.8	7219.71
303	5341	4501	2963.87	7957.65	1914.75	1608.06	2158.61	2425.88	27.007	92.237	157.036	220.898	26.917	20.223	21.715	28.926	3426.25	2892.95	805.252	5531.77
304	5566	6041.16	2274.79	14131.8	1860.12	1828.94	1326.68	2278.82	27.14	92.265	157.337	220.723	26.972	20.317	21.985	29.116	3705.88	4212.22	948.109	11852.9
305	5486	5861.45	3028.57	9367.06	1803.75	1630.52	1430.15	1903.53	27.107	92.413	157.278	220.904	27.104	20.343	22.3	28.812	3682.25	4230.92	1598.42	7463.53
306	5874	7110.44	4519.33	9808.24	1478.75	2019.2	1685.08	1707.65	27.091	92.205	156.984	220.999	26.815	20.181	22.156	28.929	4395.25	5091.24	2834.24	8100.59
307	4940	8804.22	2607.56	8561.18	1746.38	2112.95	1582.14	2199.71	27.017	91.979	157.112	220.924	26.874	20.176	21.955	28.82	3193.62	6691.27	1025.42	6361.47
308	4703	8791.17	1610.92	6710.59	1849	1536.52	1631.3	1837.79	27.028	92.061	157.333	220.789	27.03	20.103	22.132	28.882	2854	7254.64	-20.377	4872.79
309	5724	5639.56	1610.92	13429.4	1808.88	2194.03	1979.62	1716.77	27.019	92.08	157.146	220.877	26.981	19.941	21.954	29.028	3915.12	3445.53	-368.696	11712.6
310	4232	5802.21	1371.43	11581.2	1413.25	1691.89	1702.84	1620.59	27.06	92.267	157.14	220.717	27.15	20.184	21.955	28.788	2818.75	4110.32	-331.407	9960.59
311	7957	7928.72	2800.84	11258.8	2113.75	1564.38	1757.67	1703.09	27.333	92.103	157.14	220.825	26.848	19.899	21.936	29.043	5843.25	6364.33	1043.17	9555.74
312	5611	11657.6	4699.16	9276.47	1907.88	1978.92	2081.2	1979.12	26.945	92.227	156.952	220.752	26.899	19.989	22.03	28.856	3703.12	9678.72	2617.96	7297.35
313	4591	7890.56	3494.96	10314.1	1578.62	1393.07	1607.14	2108.82	26.869	92.177	157.06	220.812	26.94	19.918	21.968	28.725	3012.38	6497.49	1887.82	8205.29
314	3580	9930.72	3532.77	11447.1	1935.88	2303.21	1946.64	1930	27.027	92.462	157.209	220.882	26.966	20.352	22.407	29.184	1644.12	7627.51	1586.13	9517.06
315	6348	6973.9	3804.2	13294.1	1913.75	1904.99	1812.92	2199.56	27.031	92.264	157.149	220.866	26.651	20.121	22.169	28.849	4434.25	5068.9	1991.28	11094.6
316	6261	7160.64	1945.38	13988.2	1826.5	2124.12	1759.45	2262.35	26.958	92.088	156.954	220.878	26.88	20.333	22.162	29.01	4434.5	5036.52	185.924	11725.9
317	3281	8180.72	1831.93	12658.8	1386.25	1792.67	1851.89	1861.91	26.701	92.07	157.058	220.834	27.005	20.087	22.071	28.732	1894.75	6388.05	-19.957	10796.9
318	3435	7648.59	3140.34	10564.7	1402.75	1937.12	1945.17	1606.77	26.954	92.291	156.872	220.723	27.008	20.386	22.236	29.102	2032.25	5711.47	1195.17	8957.94
319	4236	6404.62	2961.34	10891.8	2528	1729.04	1630.57	1996.32	27.025	92.27	157.046	220.928	27.09	20.169	21.969	29.025	1708	4675.58	1330.78	8895.44
320	1867	9202.81	4326.05	5608.23	1624.25	1659.26	1339.18	1337.35	26.867	92.32	157.084	220.997	27.207	20.245	22.127	29.05	242.75	7543.55	2986.87	4270.88
321	5225	9773.09	2239.5	14731.8	1832.12	1857.81	1889.39	1745.29	26.878	92.099	157.046	220.942	26.76	20.234	22.097	28.74	3392.88	7915.29	350.105	12986.5
322	8141	6229.92	1836.97	13915.3	2043.12	1663.03	1605.15	1984.41	27.144	92.328	157.013	220.784	26.849	20.041	21.811	28.585	6097.88	4566.89	231.828	11930.9
323	4306	7113.45	3459.66	7149.41	2082.62	1525.1	1432.88	1861.47	26.92	92.154	157.216	220.943	26.757	20.093	21.991	28.998	2223.38	5588.35	2026.79	5287.94
324	6106	8106.43	2005.88	12271.8	1652.25	1940.14	1796.11	2104.41	27.12	92.199	157.027	220.699	26.751	20.29	22.103	28.998	4453.75	6166.29	209.769	10167.4
325	6740	8235.94	1610.08	12401.2	1692	2133.28	1705.25	1688.97	27.165	92.334	157.236	220.807	26.789	20.023	22.03	28.875	5048	6102.66	-95.167	10712.2
326	5988	5439.76	1309.24	11365.9	1911.75	2103.92	1483.19	2358.24	27.3	92.309	157.071	220.86	26.955	19.932	21.81	28.824	4076.25	3335.84	-173.949	9007.65
327	5959	7896.59	2576.47	12029.4	2020.75	1859.94	1753.47	2250	27.174	92.293	156.844	220.725	26.956	19.863	22.082	28.903	3938.25	6036.65	823.004	9779.41
328	5214	7524.1	2629.41	12721.2	1597	2166.16	2124.05	1762.35	27.187	92.265	157.025	221.186	27.044	20.01	21.924	29.089	3617	5357.93	505.357	10958.8
329	2974	6031.12	6647.06	6727.06	2010.5	1899.1	1646.01	2036.18	26.985	92.259	157.025	220.75	26.943	20.073	21.948	28.889	963.5	4132.03	5001.05	4690.88
330	1979	7696.79	4496.64	8092.94	1757.38	1790.04	1759.87	2068.82	26.904	92.093	156.952	220.831	26.814	20.374	22.112	29.073	221.625	5906.75	2736.76	6024.12
331	4142	7995.98	3904.2	4700	1351.25	2140.19	1889.6	1720.29	27.27	92.212	157.13	220.881	26.96	20.106	22.187	28.559	2790.75	5855.8	2014.6	2979.71
332	5263	7615.46	6853.78	6115.29	1751.5	1990.46	1780.46	1592.5	27.076	92.079	157.098	220.8	26.893	19.951	21.969	28.607	3511.5	5625	5073.32	4522.79
333	4645	8458.83	3923.53	9011.76	1615.88	1707.83	1678.68	2248.24	27.091	92.268	157.19	220.81	27.003	20.157	21.995	29.102	3029.12	6751	2244.85	6763.53
334	2818	9228.92	4384.87	6815.29	1220.88	2216.36	1508.09	1759.27	27.025	92.291	157.272	220.692	27.147	20.272	22.021	29.058	1597.12	7012.55	2876.79	5056.03
335	3254	4835.34	4520.17	6089.41	1608.25	2613.2	1396.43	1466.18	26.951	92.166	156.71	220.996	26.773	19.955	22.152	28.786	1645.75	2222.14	3123.74	4623.23
336	4010	11227.9	4918.49	8344.71	1863.88	2091.99	1292.75	2124.26	26.909	92.413	156.785	220.957	27.068	19.993	22.011	28.829	2146.12	9135.92	3625.74	6220.44
337	3946	9670.68	3814.29	4655.29	1911.12	1616.09	1805.99	2136.62	27.157	92.233	156.945	220.672	27.08	20.024	22.154	28.858	2034.88	8054.59	2008.3	2518.68
338	4946	7847.39	4442.86	6596.47	1895.5	1497.99	2068.17	2056.91	27.032	92.142	157.214	220.929	27.066	20.103	22.196	28.794	3050.5	6349.4	2374.68	4539.56
339	3169	8799.2	4107.56	9514.12	1690.5	2124.62	1799.79	1899.71	26.687	92.296	157.066	220.867	26.841	20.38	22.256	29.165	1478.5	6674.57	2307.77	7614.41
340	3472	9737.95	6388.23	5055.29	1503.5	1833.46	2298.11	1708.82	26.949	92.231	157.294	220.907	26.692	20.19	22.014	28.765	1968.5	7904.49	4090.13	3346.47
341	1875	9133.53	4900	6702.35	1407.62	2415.16	1481.62	2030.15	27.073	92.239	156.849	220.859	26.687	20.054	21.953	28.752	467.375	6718.37	3418.38	4672.21
342	5211	6314.26	5585.71	7388.23	2622.75	2011.92	1820.48	1917.65	26.842	92.322	157.084	220.786	26.82	20.159	22.315	29.11	2588.25	4302.33	3765.23	5470.59
343	2811	6943.77	4231.09	9565.88	1547	2111.2	1909.77	1699.41	27.092	92.175	157.098	220.838	26.958	20.387	22.108	28.859	1264	4832.58	2321.32	7866.47
344	1947	7162.65	4868.91	7704.71	1525.75	1966.99	1665.44	2265.74	27.13	92.16	156.762	220.838	26.897	20.012	22.258	28.647	421.25	5195.66	3203.47	5438.97
345	3148	8495.98	3409.24	9316.47	1966.75	2264.43	1696.74	2166.18	26.889	92.263	157.077	221.077	27.042	20.036	22.139	28.797	1181.25	6231.55	1712.5	7150.29
346	3609	10900.6	3701.68	7837.65	1436.12	1911.14	1729.41	2011.91	27.032	92.101	157.271	221.068	27.078	19.839	22.001	29.15	2172.88	8989.46	1972.27	5825.73
347	3366	6802.21	5476.47	9221.18	1427.75	2044.3	1737.18	1836.18	26.953	91.952	157.065	220.848	26.87	20.09	21.971	28.674	1938.25	4757.91	3739.29	7385
348	3168	5778.11	6382.35	6435.29	2228.25	1810.62	1825.84	1718.53	27.111	92.073	156.959	221.031	26.99	20.06	22.308	28.968	939.75	3967.49	4556.51	4716.77
349	4198	8592.37	5210.92	6861.18	1753.62	1730.05	2012.71	1727.79	26.872	92.063	156.955	220.805	26.813	20.147	21.991	28.802	2444.38	6862.32	3198.21	5133.38
350	3603	8187.75	4416.81	4675.29	1943.62	1921.06	2122.16	1649.27	26.833	92.179	157.326	220.921	27.101	19.836	22.144	29.187	1659.38	6266.69	2294.64	3026.03
351	3767	8689.76	5705.88	7229.41	2152.5	1726.03	1773.95	2000.73	26.951	92.371	157.12	220.738	27.079	20.179	22.375	28.844	1614.5	6963.73	3931.93	5228.68
352	3088	6088.35	3447.06	12868.2	1484	2168.8	1878.68	2263.38	27.008	92.308	157.002	220.879	27.117	20.29	21.951	28.97	1604	3919.55	1568.38	10604.9
353	5311	9240.96	5599.16	9912.94	1834.12	1928.71	1912.29	2491.76	27.009	92.331	157.12	220.992	26.871	20.189	21.954	28.883	3476.88	7312.25	3686.87	7421.18
354	4407	9383.53	8094.96	7988.23	1454.75	2051.08	1826.37	1957.35	27.107	92.262	157.012	220.933	26.761	20.252	22.285	28.855	2952.25	7332.45	6268.59	6030.88
355	4833	10704.8	3700	9876.47	1519.12	1830.82	1932.77	2435.44	26.899	92.171	156.973	220.864	27.028	20.068	22.166	28.887	3313.88	8874	1767.23	7441.03
356	2428	6747.99	5056.3	7967.06	1651.62	2118.1	2310.61	1565.88	26.888	92.295	157.092	220.938	26.792	20.282	22.086	28.802	776.375	4629.9	2745.69	6401.18
357	2752	10687.8	6401.68	8008.23	1474.25	1937.37	1951.05	1886.77	26.912	92.284	157.242	220.871	26.774	20.443	22.343	28.919	1277.75	8750.38	4450.63	6121.47
358	3254	9875.5	7968.07	7875.29	1808.5	1703.56	1965.65	1591.77	26.745	92.197	157.24	220.767	26.666	20.134	22.183	29.096	1445.5	8171.94	6002.42	6283.53
359	3193	8769.08	4991.6	4857.65	2247.62	2015.19	1882.35	2057.35	27.237	92.017	157.061	221.035	26.799	20.106	22.16	28.861	945.375	6753.89	3109.24	2800.29
360	3375	10718.9	7192.44	8144.71	2012.38	1926.71	1770.06	1957.65	27.204	92.396	156.945	221.021	26.934	20.224	22.204	28.962	1362.62	8792.17	5422.37	6187.06
361	4540	7065.26	4926.05	7296.47	1391.5	2012.42	1947.06	1630.59	26.713	92.068	157.141	221.137	27.225	20.164	22.275	29.059	3148.5	5052.84	2978.99	5665.88
362	2879	12697.8	4803.36	6977.65	1487.75	1731.55	1627.84	2415.29	27.08	92.38	156.952	221.154	26.957	20.263	22.186	29.005	1391.25	10966.2	3175.53	4562.35
363	3115	8899.6	4669.75	8363.53	1784	2002.64	1678.26	1758.82	27.286	92.312	157.292	220.884	26.674	20.134	22.209	28.801	1331	6896.96	2991.49	6604.71
364	2289	9519.08	4876.47	8312.94	1809.5	1774.72	2034.03	1985.15	27.124	92.211	157.031	221.046	26.792	19.933	22.13	28.75	479.5	7744.35	2842.44	6327.79
365	3585	7907.63	7747.9	2654.12	1554.25	1645.46	1686.45	2192.79	26.989	92.117	157.146	221.188	26.963	20.086	22.175	29.105	2030.75	6262.17	6061.45	461.324
366	2951	6691.77	5735.29	4091.76	1982.88	1808.99	1898.85	1719.12	27.091	92.104	157.194	220.926	26.991	20.2	22.164	28.972	968.125	4882.78	3836.45	2372.65
367	3201	8427.71	6182.35	2468.24	1762.25	1793.05	1590.23	1363.82	27.207	91.999	157.332	220.779	26.74	19.895	22.255	28.637	1438.75	6634.66	4592.12	1104.41
368	4897	6079.32	5336.98	4458.82	1700	1676.58	1823.74	1486.77	27.113	92.05	157.168	220.791	26.943	20.312	22.102	28.736	3197	4402.74	3513.24	2972.06
369	5723	7714.86	2720.17	6827.06	1360.38	1753.39	1496.74	2267.21	26.799	92.132	157.255	220.947	27	20.22	22.214	28.571	4362.62	5961.47	1223.42	4559.85
370	7314	4021.08	2052.1	11508.2	1941.12	1879.27	1430.57	1570.15	27.33	92.201	157.038	220.881	26.888	20.05	21.826	29.019	5372.88	2141.82	621.534	9938.09
371	6582	3988.96	3477.31	8676.47	1863.25	1754.77	1870.06	1941.32	26.891	92.373	157.002	221.093	27.063	20.027	22.182	28.87	4718.75	2234.19	1607.25	6735.15
372	5287	4215.86	1521.85	6123.53	1955.75	1724.4	2121.74	2482.21	26.952	92.174	157.023	221.061	27.117	19.944	22.076	28.939	3331.25	2491.47	-599.894	3641.32
373	3036	6039.16	2382.35	6584.71	1593.62	1546.94	1789.08	2095.59	27.255	92.083	156.855	220.987	26.902	20.164	22.309	28.82	1442.38	4492.22	593.277	4489.12
374	5447	8448.8	4136.98	4820	1753.5	2161.65	1856.83	2263.97	26.948	92.314	156.934	220.719	26.725	20.226	22.293	28.745	3693.5	6287.15	2280.15	2556.03
375	7204	3841.36	4248.74	12716.5	1971.62	1411.77	1767.65	1622.21	26.979	91.94	157.186	220.967	26.906	20.429	22.122	28.977	5232.38	2429.59	2481.09	11094.3
376	6914	3887.55	2470.59	6244.71	1728.38	1361.19	1604.94	1980.88	27.165	92.041	156.721	220.886	26.786	20.274	21.953	28.957	5185.62	2526.36	865.651	4263.82
377	5254	2343.37	3494.96	7354.12	1966	1874	1808.61	1940.44	27.34	92.309	157.433	220.73	26.792	19.94	22.112	28.771	3288	469.378	1686.35	5413.68
378	7236	2972.89	1433.61	8654.12	2026.25	1908.01	1433.3	1907.79	27.085	92.116	157.141	220.938	26.697	20.033	21.844	28.767	5209.75	1064.88	0.315	6746.32
379	1256	8785.14	3694.96	4456.47	1568.38	1668.05	1551.47	2399.12	27.074	92.243	157.041	221.009	26.904	20.188	22.071	28.806	-312.374	7117.09	2143.49	2057.35
380	5464	3977.91	2773.11	12929.4	1767.38	2075.93	1679.83	1551.18	27.261	92.066	156.943	220.949	26.859	20.101	22.014	28.806	3696.62	1901.98	1093.28	11378.2
381	4853	5375.5	3429.41	6710.59	2088.38	2018.83	1788.76	1874.41	26.888	92.3	157.138	220.807	27.092	20.165	22.253	29.149	2764.62	3356.68	1640.65	4836.18
382	1779	3629.52	4392.44	5868.23	1741.25	1749.5	1786.45	1724.85	26.869	92.056	157.028	220.739	26.958	20.218	22.066	28.908	37.75	1880.02	2605.99	4143.38
383	4975	7965.86	4434.45	7930.59	1861.88	1943.78	1530.57	1527.06	27.036	92.16	157.363	220.868	26.743	19.877	22.109	28.675	3113.12	6022.09	2903.89	6403.53
384	2651	7175.7	8366.39	4676.47	1413.12	1826.31	1653.89	1940	27.023	91.73	156.975	220.756	27.291	20.121	22.08	28.629	1237.88	5349.4	6712.5	2736.47
385	1147	8749	7335.29	4141.18	1765.12	1981.17	1913.23	2182.21	27.049	92.227	157.169	220.905	26.979	20.289	22.2	28.942	-618.124	6767.82	5422.06	1958.97
386	3565	8773.09	4764.71	5960	1888.38	1702.81	1932.77	2198.82	27.149	92.203	157.286	220.811	26.905	20.158	21.915	28.854	1676.62	7070.28	2831.93	3761.18
387	3298	6453.81	8495.8	5724.71	1988.38	1959.09	2193.8	1701.62	27.068	92.164	157.193	221.246	27.071	20.059	22.156	29.254	1309.62	4494.73	6302	4023.09
388	5276	5977.91	5361.35	3775.29	2109.5	1977.79	2179.73	1912.94	27.313	92.018	157.248	221.073	26.851	20.272	22.196	28.63	3166.5	4000.13	3181.62	1862.35
389	4002	7462.85	6751.26	4840	1625.62	2126.26	1981.51	1863.82	27.21	91.897	157.186	220.859	26.835	20.119	22.064	28.75	2376.38	5336.6	4769.75	2976.18
390	6029	8583.33	4670.59	4789.41	1563.25	2018.57	2071.43	1538.23	27.31	92.044	157.164	220.808	27.047	20.135	22.099	29.234	4465.75	6564.76	2599.16	3251.18
391	2729	10260	3888.24	8296.47	1588	1803.46	1705.46	1599.41	26.855	92.049	157.141	220.784	26.839	20.053	22.116	28.796	1141	8456.58	2182.77	6697.06
392	2478	7652.61	4022.69	4676.47	1804.88	2090.24	1487.92	1983.97	27.123	92.254	156.988	220.939	26.985	20.261	22.009	28.754	673.125	5562.37	2534.77	2692.5
393	2640	9062.25	4658.82	5589.41	1963	2264.43	1768.8	2218.09	27.27	92.185	156.94	220.814	26.814	20.247	22.274	29.109	677	6797.82	2890.02	3371.32
394	4301	6854.42	3768.07	7956.47	1699.5	1771.59	1578.36	2583.24	27.018	92.039	157.011	220.778	26.961	20.171	22.142	28.774	2601.5	5082.83	2189.71	5373.23
395	5216	8842.37	4079.83	5128.23	1677.38	1929.22	1750.11	1673.09	26.721	92.188	157.197	221.007	26.908	20.121	22.231	28.711	3538.62	6913.15	2329.73	3455.15
396	3421	9103.41	2787.39	5715.29	1903.5	1854.29	1468.7	1965.73	26.945	92.176	156.926	220.917	26.964	20.026	21.944	28.701	1517.5	7249.12	1318.7	3749.56
397	3336	8321.28	5605.04	5491.77	1642.38	1811.62	1952.52	2046.77	27.046	92.154	156.814	220.986	26.791	19.962	22.185	28.963	1693.62	6509.66	3652.52	3445
398	2931	6646.59	3782.35	8103.53	1787.62	1693.65	1665.23	1584.56	27.2	92.174	157.145	220.723	26.861	20.264	22.055	29.006	1143.38	4952.94	2117.12	6518.97
399	3942	6107.43	5099.16	7951.77	1927.12	1406.38	1896.11	1356.03	27.153	92.047	157.138	220.877	26.938	20.143	22.092	29.228	2014.88	4701.05	3203.05	6595.73
400	4498	4911.65	4623.53	5902.35	2001.38	2190.01	1720.17	1991.77	27.041	92.138	157.124	220.841	26.89	20.116	22.06	28.559	2496.62	2721.64	2903.36	3910.59
401	2308	6022.09	5933.61	2711.76	1842	1659.14	2161.03	1546.32	27.043	92.46	157.043	220.78	26.901	20.137	22.186	29.047	466	4362.95	3772.58	1165.44
402	2626	6147.59	5847.9	4463.53	1605.62	1522.21	1752.31	1525.73	26.665	92.193	157.073	221.02	27.211	19.975	22.175	29.007	1020.38	4625.38	4095.59	2937.79
403	1970	5651.61	3547.9	4621.18	1805.38	1746.49	1792.02	1664.56	26.962	92.454	157.12	221.17	27.052	20.027	22.29	28.895	164.625	3905.12	1755.88	2956.62
404	2817	6740.96	5312.6	5387.06	1788.75	2033.26	1941.91	1542.94	27.096	92.141	157.121	220.911	27.07	20.283	22.13	28.875	1028.25	4707.71	3370.69	3844.12
405	5472	11100.4	5904.2	4108.23	1733.25	2342.75	1891.28	1991.77	27.158	92.352	157.133	220.883	27.249	20.227	22.097	28.855	3738.75	8757.66	4012.92	2116.47
406	3702	8228.92	5525.21	5618.82	1947.75	2368.22	1796.32	2131.76	27.123	92.532	157.071	220.901	27.193	20.178	22.174	28.689	1754.25	5860.69	3728.89	3487.06
407	2596	6200.8	5974.79	7254.12	1354.25	2130.27	1521.43	1343.09	27.406	92.126	157.038	220.842	26.808	20.204	22.23	28.954	1241.75	4070.53	4453.36	5911.03
408	2936	11245	6207.56	6514.12	1630.25	1840.86	1945.8	1849.12	27.077	92.433	156.884	220.931	26.929	20.034	21.987	28.683	1305.75	9404.12	4261.77	4665
409	4123	4996.99	5000	5890.59	1883.88	1575.93	1992.75	1687.94	27.276	92.359	156.973	220.88	26.97	20.112	22.406	29.045	2239.12	3421.06	3007.25	4202.65
410	5378	5432.73	4677.31	7760	2553	2109.44	1715.44	1883.68	27.221	92.064	157.147	220.83	26.865	20.272	21.915	28.788	2825	3323.29	2961.87	5876.32
411	3313	7289.16	2930.25	6255.29	1950.88	1879.89	1654.83	1735.88	27.281	92.091	157.115	220.964	26.967	19.916	22.165	29.03	1362.12	5409.26	1275.42	4519.41
412	2448	7478.92	4552.94	3392.94	1510.75	1886.92	1371.95	1770.29	26.971	92.151	156.958	220.972	27.241	20.082	22.138	28.995	937.25	5591.99	3180.99	1622.65
413	1924	6372.49	5150.42	4123.53	1342.75	1579.44	1680.78	1908.97	27.152	92.032	157.143	220.679	26.751	20.025	22.115	28.754	581.25	4793.05	3469.64	2214.56
414	4106	7125.5	5572.27	5812.94	2369.5	1688.88	2079.62	1901.47	27.195	92.215	157.03	221.064	26.968	20.455	22.519	29.027	1736.5	5436.62	3492.65	3911.47
415	2984	3833.33	4371.43	3170.59	2094	1573.67	1605.67	1437.94	26.96	92.099	157.117	220.997	27.071	20.05	21.922	28.823	890	2259.66	2765.76	1732.65
416	2678	7395.58	4824.37	6668.23	1679.62	1797.57	1628.68	1951.18	27.213	92.091	157.159	220.898	26.858	20.158	21.993	29.139	998.375	5598.02	3195.69	4717.06
417	3505	6610.44	5875.63	4868.23	1764.62	2049.7	1609.77	2076.62	26.92	92.363	157.359	220.854	26.83	20.323	22.405	29.084	1740.38	4560.74	4265.86	2791.62
418	2760	6546.19	4863.87	5330.59	1799.75	1807.23	1616.7	1685.15	27.104	92.112	156.985	221.253	27.159	20.313	21.968	28.759	960.25	4738.96	3247.16	3645.44
419	3299	4629.52	7289.92	2158.82	2154.62	2078.94	1840.23	1592.5	26.99	92.286	157.047	221.038	27.017	20.04	22.058	29.129	1144.38	2550.58	5449.69	566.324
420	2993	6773.09	7359.66	3303.53	1622.75	1939.51	2007.04	1722.35	27.119	92.136	157	220.995	26.855	20.155	22.339	29.001	1370.25	4833.58	5352.63	1581.18
421	2236	7710.84	6842.02	7823.53	1757.5	2158.64	1915.02	1916.77	27.22	92.436	157.09	220.876	26.741	20.157	21.755	28.892	478.5	5552.21	4927	5906.77
422	5949	3616.47	4511.77	2590.59	1935.25	1967.62	1667.33	1980.15	27.1	91.958	156.974	221.014	27.081	20.295	21.837	28.794	4013.75	1648.85	2844.43	610.441
423	3773	9545.18	3789.92	4436.47	1791	1805.1	1637.61	1850.59	26.975	92.352	157.066	220.797	26.918	20.216	22.194	28.856	1982	7740.09	2152.31	2585.88
424	4052	7976.91	5723.53	5821.18	2003	1486.7	1262.61	2375.29	27.165	92.213	157.178	220.802	27.013	20.022	22.011	28.707	2049	6490.21	4460.92	3445.88
425	1468	3936.75	4862.19	4272.94	1380.75	1278.24	1543.91	1458.09	26.933	92.113	157.112	220.927	26.875	20.16	22.15	29.025	87.25	2658.51	3318.28	2814.85
426	1717	4044.18	2519.33	2395.29	1664.12	1679.34	1736.97	1770.59	27.062	91.973	157.137	221.165	26.942	20.239	22.179	29.018	52.875	2364.83	782.353	624.706
427	3952	6879.52	5796.64	5141.18	1817.5	2186.5	1546.11	1540.88	26.946	92.173	157.184	221.015	26.702	20.118	22.001	28.798	2134.5	4693.02	4250.52	3600.29
428	3952	6178.72	6836.13	6016.47	1455	2004.89	1740.97	1869.85	26.997	92.099	157.308	220.804	26.762	20.26	22.132	28.947	2497	4173.82	5095.17	4146.62
429	3743	4389.56	5737.81	3901.18	2184.12	1640.19	1576.15	1859.71	26.906	92.091	156.904	220.771	26.779	19.987	21.979	28.782	1558.88	2749.37	4161.66	2041.47
430	3033	4939.76	7844.54	3348.24	1872.12	1693.78	1564.18	2009.27	26.837	92.123	157.218	221.004	27.091	20.105	22.226	28.774	1160.88	3245.98	6280.36	1338.97
431	4033	6567.27	4961.35	2572.94	1797.5	1133.28	1859.35	2085.74	26.968	92.121	156.951	221.076	27.13	20.247	22.157	29.345	2235.5	5433.99	3102	487.206
432	5359	3012.05	4833.61	2607.06	2144.25	2303.09	1853.26	1969.85	27.321	92.06	157.075	220.833	26.756	20.142	22.127	29.076	3214.75	708.961	2980.36	637.206
433	6150	7085.34	4552.94	3254.12	1664.62	2295.43	2158.51	1649.27	27.024	92.308	157.075	220.917	27.209	20.13	22.14	28.941	4485.38	4789.91	2394.43	1604.85
434	3546	7551.2	6556.3	5101.18	1758.38	1788.4	1698.21	1751.03	26.935	92.163	157	220.687	26.877	20.365	22.188	28.752	1787.62	5762.8	4858.09	3350.15
435	2672	10594.4	3934.45	6945.88	1716.62	1382.4	1845.8	1607.94	26.91	92.131	156.969	220.893	26.932	20.321	22.165	28.441	955.375	9211.97	2088.66	5337.94
436	3962	6518.07	4704.2	9604.71	1975.62	1755.4	1820.17	1659.85	27.309	92.185	157.106	220.877	26.944	20.26	22.316	29.047	1986.38	4762.68	2884.03	7944.85
437	3469	11300.2	3969.75	8005.88	2258.88	1885.17	2132.35	1378.82	26.971	92.241	156.761	220.708	26.871	20.287	21.921	28.847	1210.12	9415.03	1837.39	6627.06
438	3594	6808.23	4141.18	9330.59	1472.38	1981.93	1667.33	1927.5	27.093	92.262	156.99	220.836	27.101	20.344	21.86	28.75	2121.62	4826.31	2473.84	7403.09
439	2441	9587.35	6218.49	10447.1	1754.88	1549.95	1930.57	1440.29	26.985	92.265	157.069	221.241	26.759	20.12	22.303	28.929	686.125	8037.4	4287.92	9006.76
440	4128	9318.27	6198.32	7130.59	1592.38	1492.09	1767.86	1898.53	26.83	92.275	157.101	220.754	27.21	20.109	22.394	28.838	2535.62	7826.18	4430.46	5232.06
441	3716	9593.37	5969.75	8302.35	1415.38	1883.28	1906.09	1818.38	27.113	92.214	157.188	221.029	26.689	20.213	22.319	28.848	2300.62	7710.09	4063.66	6483.97
442	2390	9849.4	4609.24	9849.41	1997.75	2165.79	1633.51	1803.38	27.042	92.261	157.06	220.902	26.925	20.116	22.425	28.879	392.25	7683.61	2975.74	8046.03
443	3409	8318.27	5542.86	10068.2	1564.38	1723.52	1641.18	2161.47	26.772	92.394	157.1	220.991	26.962	20.187	21.974	28.767	1844.62	6594.75	3901.68	7906.77
444	4061	8613.45	4209.24	9881.18	2071.38	1988.83	1727.73	2061.18	26.994	92.201	157.087	220.658	26.977	20.293	22.1	28.726	1989.62	6624.62	2481.51	7820
445	5406	6659.64	2849.58	11543.5	1784	1863.2	2136.87	2135.59	27.189	92.184	157.093	220.67	27.097	20.129	22.285	29.08	3622	4796.44	712.71	9407.94
446	3335	8586.34	5678.99	6470.59	1932	1821.41	1915.86	2192.21	27.057	92.255	157.183	220.778	26.702	20.049	22.017	28.634	1403	6764.94	3763.13	4278.38
447	4402	12301.2	4400	10432.9	1787.75	1662.65	1785.5	2130.44	26.944	92.154	157.197	220.939	26.818	20.272	22.064	28.808	2614.25	10638.6	2614.5	8302.5
448	4299	8816.26	3642.86	8858.82	2007.75	2227.41	1763.34	1887.79	26.795	92.035	157.237	220.914	26.845	20.233	22.169	29.089	2291.25	6588.85	1879.52	6971.03
449	3012	8814.26	3457.98	6502.35	1989.62	1746.99	1480.99	2428.97	27.058	92.297	157.018	220.841	27.058	20.075	21.983	28.922	1022.38	7067.27	1977	4073.38
450	3664	5746.99	3214.29	11494.1	1983.62	1685.12	1697.69	1895.88	27.192	92.342	157.241	220.535	27.1	20.282	22.271	28.951	1680.38	4061.87	1516.6	9598.24
451	930	8604.42	3190.76	5308.23	1679.88	2019.95	1577.63	2444.41	26.666	92.383	156.937	220.94	27.013	20.008	22.176	28.642	-749.874	6584.46	1613.13	2863.82
452	2853	10135.5	5042.86	7637.65	1532.12	2028.11	1315.86	1514.71	27.016	92.331	156.949	220.753	27.315	20.214	22.242	28.849	1320.88	8107.43	3727	6122.94
453	953	6815.26	5073.95	9636.47	1603.88	2195.53	1715.97	2006.18	27.164	92.097	157.025	220.816	27.234	20.234	22.208	28.81	-650.874	4619.73	3357.98	7630.29
454	2011	9378.51	6301.68	7563.53	1902.75	1982.43	1319.75	2197.94	27.036	92.307	157.188	220.998	27.048	20.328	22.294	29.048	108.25	7396.08	4981.93	5365.59
455	2984	9418.67	6591.6	4441.18	1682.38	1682.86	2198.42	1570.73	26.937	92.236	157.081	220.785	26.901	20.193	22.071	28.917	1301.62	7735.82	4393.17	2870.44
456	4385	6158.64	5584.03	4394.12	1553.88	1938.88	1796.43	1725.15	27.066	92.232	157.246	220.563	26.85	20.162	22.203	28.843	2831.12	4219.75	3787.61	2668.97
457	2745	7723.9	4415.97	7192.94	1406.12	1936.37	1574.68	1478.53	26.925	92.071	156.944	221.042	26.82	20.096	22.299	28.881	1338.88	5787.52	2841.28	5714.41
458	1384	8863.45	6526.89	7963.53	1600.5	2115.46	2072.79	1520.88	27.016	92.368	157.041	220.994	27.058	20.229	22.347	29.192	-216.499	6747.99	4454.1	6442.65
459	1856	8071.28	4623.53	5357.65	1537.5	2315.76	2084.24	1663.53	26.954	92.278	157.186	220.882	27.127	20.086	22.094	28.825	318.5	5755.52	2539.29	3694.12
460	2670	12265.1	7713.44	5355.29	1681.25	1477.16	1710.71	1861.47	27.041	92.231	156.929	220.888	27.081	20.09	21.996	28.986	988.75	10787.9	6002.73	3493.82
461	3074	6507.03	8584.03	3532.94	1589.25	2365.59	1771.32	1739.41	27.153	92.138	157.182	220.98	26.809	20.029	22.019	28.897	1484.75	4141.44	6812.71	1793.53
462	3436	6114.46	3854.62	5022.35	1494.5	2420.05	1858.93	2246.18	26.833	92.147	157.09	220.939	26.822	20.198	22.254	29.168	1941.5	3694.4	1995.69	2776.18
463	2342	8479.92	5515.97	7889.41	2105.25	1909.01	1591.07	1854.85	26.996	92.166	157.098	220.956	26.929	20.25	22.303	28.884	236.75	6570.91	3924.89	6034.56
464	6281	11491	6642.02	3569.41	1980.5	2360.44	2085.71	1934.41	27.258	92.318	157.228	221.139	27.034	20.108	22.048	28.987	4300.5	9130.52	4556.3	1635
465	3557	4440.76	6957.14	3097.65	1790.62	2377.64	1843.8	1882.21	26.948	91.978	157.198	220.691	27.074	19.998	22.159	28.769	1766.38	2063.13	5113.34	1215.44
466	3412	6504.02	5590.76	6950.59	1910.62	1571.03	1375.11	1897.79	27.12	92.042	156.988	220.92	26.909	20.198	22.085	28.985	1501.38	4932.98	4215.65	5052.79
467	4457	6847.39	4885.71	6568.23	2089.88	2154.37	1570.59	2048.53	27.27	92.063	157.206	220.751	26.953	20.237	22.069	28.784	2367.12	4693.02	3315.13	4519.71
468	5536	7097.39	3947.9	9101.18	1912.62	1884.41	2053.89	1714.85	27.066	92.274	156.879	220.671	26.932	20.352	22.233	29.011	3623.38	5212.98	1894.01	7386.32
469	2694	7426.71	4651.26	2457.65	1649.5	1942.14	2048.95	1969.41	26.78	92.035	156.92	221.028	27.117	20.175	22.057	28.788	1044.5	5484.56	2602.31	488.235
470	2826	8624.5	4447.06	4884.71	2018.5	2199.8	1625.32	2039.85	26.988	92.345	157.245	220.92	26.95	19.855	22.018	28.807	807.5	6424.7	2821.74	2844.85
471	2579	7742.97	5054.62	6768.23	1544.62	1303.84	1506.72	2092.21	26.989	92.269	156.997	220.872	26.857	20.041	21.842	28.95	1034.38	6439.13	3547.9	4676.03
472	2388	10984.9	5842.02	10751.8	1827	1653.36	1670.69	2397.06	26.901	92.343	157.209	220.9	27.313	19.903	22.177	29.086	561	9331.58	4171.32	8354.71
473	3715	7848.39	4105.88	13068.2	1845.38	1586.47	1864.71	1927.5	27.016	92.131	157.175	220.901	27.065	20.005	22.167	28.951	1869.62	6261.92	2241.18	11140.7
474	4262	8378.51	5256.3	10897.6	1644.5	1695.03	1688.55	1763.82	26.881	92.237	157.162	220.889	26.892	19.978	22.065	28.99	2617.5	6683.48	3567.75	9133.82
475	1153	13405.6	6478.99	9151.76	1612.88	1617.6	1673.32	1825.88	27.077	92.352	157.069	220.749	27.027	20.109	22.168	28.858	-459.874	11788	4805.67	7325.88
476	3480	11002	5334.45	7143.53	1732.38	2232.05	1329.41	1540.29	26.875	92.444	157.097	220.904	26.796	19.98	22.065	28.674	1747.62	8769.95	4005.04	5603.23
477	4302	9227.91	2899.16	9516.47	1780.62	2477.03	2460.82	2002.94	26.999	92.236	156.998	220.673	26.908	20.122	22.099	29.019	2521.38	6750.88	438.34	7513.53
478	4471	9378.51	3292.44	5868.23	1383.88	2035.14	1845.9	2048.82	27.125	92.181	157.044	221.005	26.903	20.121	22.184	28.741	3087.12	7343.37	1446.53	3819.41
479	3475	10310.2	5596.64	6802.35	1970.5	1848.64	1775.21	1987.94	26.965	92.266	156.967	220.704	27.018	20.012	21.79	28.933	1504.5	8461.6	3821.43	4814.41
480	3470	4992.97	4881.51	8122.35	2029.75	1826.81	2164.92	1269.41	26.846	92.011	157.17	220.98	27.256	20.077	22.06	28.635	1440.25	3166.16	2716.6	6852.94
481	3993	8441.77	3982.35	6192.94	1690.88	2003.89	1712.61	2344.12	27.049	92.228	157.087	220.931	27.325	20.298	22.149	29.147	2302.12	6437.88	2269.75	3848.82
482	4465	10313.3	4163.02	5535.29	1696.12	1602.41	2128.68	1652.21	27.285	92.341	157.255	220.951	27.016	20.156	22.09	28.951	2768.88	8710.84	2034.35	3883.09
483	2446	11453.8	3450.42	9097.65	1523.88	1925.33	2297.06	2306.62	26.955	92.321	156.974	220.693	27.005	20.084	21.902	28.955	922.125	9528.49	1153.36	6791.03
484	3753	9480.92	6431.09	8254.12	1652.62	2215.86	1890.65	1761.03	26.905	92.306	156.828	220.829	27.212	20.044	21.852	28.803	2100.38	7265.06	4540.44	6493.09
485	4187	10100.4	4496.64	8582.35	2154.12	1781	1486.24	2098.68	27.156	92.305	157.083	220.782	26.795	19.968	22.261	28.958	2032.88	8319.4	3010.4	6483.68
486	2754	10101.4	5020.17	8272.94	1638.38	1899.22	1709.87	1580.15	27.019	92.269	157.064	220.886	27.068	19.901	21.95	28.525	1115.62	8202.18	3310.29	6692.79
487	3075	10595.4	6736.98	11843.5	1599.62	2073.67	1780.04	1778.53	26.988	92.294	157.223	220.671	27.042	20.415	22.409	29.082	1475.38	8521.71	4956.93	10065
488	2787	11598.4	3897.48	7210.59	1624	1645.08	1556.72	2251.47	26.989	92.311	156.879	220.934	27.129	20.175	22.043	28.774	1163	9953.31	2340.76	4959.12
489	2404	9068.27	6844.54	6229.41	1707	1794.68	2123.63	1592.5	27.104	92.037	157.058	220.976	27.135	19.911	22.118	28.929	697	7273.59	4720.9	4636.91
490	2190	10195.8	3464.71	7277.65	1820.62	2025.85	1643.28	1976.32	26.975	92.432	157.148	220.944	27.122	20.156	21.943	29.017	369.375	8169.93	1821.43	5301.32
491	5075	6717.87	3520.17	9634.12	1949.38	1535.64	1741.39	2205	26.877	92.217	156.951	220.77	26.679	20.211	22.206	28.894	3125.62	5182.23	1778.78	7429.12
492	2100	10970.9	3265.55	11218.8	1374.12	1859.94	1513.34	1567.65	26.921	92.275	157.028	220.901	27.063	20.23	22.287	28.831	725.875	9110.94	1752.21	9651.18
493	2719	7097.39	4636.98	8687.06	2138.38	1870.98	1627.21	1918.68	26.976	92.274	157.012	220.9	26.771	20.121	22.4	28.793	580.625	5226.41	3009.77	6768.38
494	3622	7976.91	5557.14	5770.59	1794.62	1818.65	1578.99	2028.82	27.145	92.309	156.735	220.683	26.749	19.973	22.089	28.692	1827.38	6158.26	3978.15	3741.76
495	3336	12170.7	4372.27	11434.1	1429.25	2307.73	1788.44	2542.06	27.126	92.174	157.135	220.765	26.969	20.043	22.276	28.939	1906.75	9862.95	2583.82	8892.06
496	3697	9538.15	5104.2	7909.41	1311.12	1675.2	1556.62	1836.18	26.928	92.275	157.35	220.946	26.853	20.222	22.106	29.045	2385.88	7862.95	3547.58	6073.23
497	5222	7430.72	3853.78	12034.1	1999.5	2070.78	2045.8	1767.65	26.991	92.297	156.966	220.878	26.913	19.991	22.051	29.027	3222.5	5359.94	1807.98	10266.5
498	1647	7580.32	4932.77	7861.18	1715.75	2023.59	1357.35	1929.85	27.24	92.238	157.032	221.15	26.73	20.199	22.17	28.652	-68.749	5556.73	3575.42	5931.32
499	2933	7879.52	2993.28	9375.29	2130.75	2049.07	1337.08	1675.73	27.203	92.223	156.995	220.877	26.805	19.975	22.23	28.578	802.25	5830.45	1656.2	7699.56
500	3521	9322.29	2874.79	8469.41	1533.88	2356.05	2034.03	1936.32	26.958	92.125	157.13	220.872	26.801	19.953	22.267	28.761	1987.12	6966.24	840.756	6533.09
501	2926	11885.5	4144.54	9041.18	1956.88	1779.12	1818.17	1845.29	27.206	92.312	157.148	220.713	26.744	19.951	22.239	28.692	969.125	10106.4	2326.37	7195.88
502	2180	11563.3	4354.62	12616.5	1738	2118.98	2007.25	1795.73	27.021	92.142	157.071	220.765	27.018	20.11	22.246	29.026	442	9444.28	2347.37	10820.7
503	2723	9557.23	4263.87	10668.2	1629.38	1877.38	2173.11	1880.15	27.219	92.3	157.025	220.861	26.911	19.979	22.033	28.683	1093.62	7679.84	2090.76	8788.09
504	2946	10179.7	4609.24	8904.71	1948.12	2512.3	1447.79	2202.5	27.08	92.307	157.005	220.835	27.051	20.21	22.13	28.835	997.875	7667.42	3161.45	6702.21
505	2563	7152.61	4834.45	11301.2	1758.62	2325.8	1938.03	1660	27.077	92.275	157.104	220.743	26.959	20.19	22.259	28.906	804.375	4826.81	2896.43	9641.18
506	4131	7566.27	3700.84	7643.53	1828.88	1823.17	1597.37	2076.91	27.229	92.177	157.278	220.931	27.227	20.235	22.15	28.86	2302.12	5743.1	2103.47	5566.62
507	5063	8196.79	3914.29	10623.5	1470.5	1605.55	1611.03	1632.5	27.187	92.238	157.016	220.926	26.74	20.028	22.419	28.838	3592.5	6591.24	2303.26	8991.03
508	3458	10513.1	5389.08	8744.71	1778.88	2048.7	2064.39	1723.09	26.94	92.206	157.146	220.848	26.754	20.329	22.336	28.858	1679.12	8464.36	3324.68	7021.62
509	5449	8417.67	4661.35	10804.7	1696.75	1781.88	1502.73	2119.41	27.26	92.261	157.003	220.997	26.991	20.209	22.271	28.792	3752.25	6635.79	3158.61	8685.29
510	2541	6523.09	6108.4	3488.24	2358	2177.08	1779.2	1831.32	27.214	92.216	156.903	220.933	26.979	20.125	22.195	28.979	183	4346.01	4329.2	1656.91
511	3359	4371.49	9633.61	4502.35	2222.88	1941.64	2210.4	1796.18	27.256	92.033	157.103	220.981	26.956	20.295	22.202	28.752	1136.12	2429.84	7423.21	2706.18
512	2457	7059.24	4542.86	4732.94	1574.88	2151.48	1571.85	1928.68	27.247	92.053	157.188	220.938	26.867	20.089	21.968	28.741	882.125	4907.76	2971.01	2804.26
513	2268	10951.8	5065.55	9254.12	1529.88	1937	1918.7	1615.15	27.063	92.513	157.017	220.8	26.907	20.052	22	28.986	738.125	9014.81	3146.85	7638.97
514	2760	5781.12	5863.02	5844.71	1897.38	1696.54	1941.6	1510.15	26.697	92.379	157.093	220.804	27.013	20.432	22.267	29.163	862.625	4084.59	3921.43	4334.56
515	3551	5482.93	5506.72	5922.35	1690.5	1893.83	2129.83	1956.32	26.939	92.236	156.935	220.703	26.598	20.124	22.219	29.047	1860.5	3589.11	3376.89	3966.03
516	3567	9476.91	4218.49	5556.47	1367.88	1584.46	1933.61	1989.12	27.054	92.094	157.022	220.964	26.926	20.118	22.007	29.1	2199.12	7892.44	2284.87	3567.35
517	4724	11287.1	4349.58	6623.53	1691.12	1866.72	1729.1	1233.38	26.948	92.309	156.882	220.81	26.822	20.11	22.269	28.709	3032.88	9420.43	2620.48	5390.15
518	3701	5659.64	7251.26	5037.65	1682.62	1947.79	1828.36	1645.44	27.122	92.131	157.125	221.061	26.969	20.232	22.268	28.744	2018.38	3711.85	5422.9	3392.21
519	3930	6385.54	4521.85	9221.18	1332.75	1772.21	1760.5	1585.29	26.892	92.438	157.01	221.012	27.147	20.257	22.299	29.095	2597.25	4613.33	2761.34	7635.88
520	4162	7542.17	3526.89	10357.6	1566.38	2535.52	1491.91	1594.71	27.134	92.122	157.098	220.834	26.948	20.191	22.427	28.921	2595.62	5006.65	2034.98	8762.94
521	4189	10968.9	3799.16	4687.06	2016.25	1846.51	2119.43	2136.03	27.147	92.403	157.037	221.018	26.957	20.137	22.033	28.727	2172.75	9122.36	1679.73	2551.03
522	3275	8176.71	3852.94	5968.23	1733	2296.31	1969.75	2042.35	26.81	92.091	157.256	221.201	27.131	20.066	21.966	29.149	1542	5880.4	1883.19	3925.88
523	2858	6485.94	4594.96	7661.18	1840.88	2134.66	1632.25	2314.12	26.964	92.291	156.914	220.904	26.816	20.155	21.991	28.979	1017.12	4351.28	2962.71	5347.06
524	3549	6632.53	3687.39	7445.88	1499.5	1687.88	1357.56	1857.65	27.018	92.403	157.187	220.905	26.937	20.177	22.359	29.199	2049.5	4944.65	2329.83	5588.23
525	4081	10210.8	6120.17	5391.77	2011.25	1945.66	1936.35	1734.56	26.99	92.351	157.056	220.806	26.933	20.379	22.303	28.882	2069.75	8265.19	4183.82	3657.21
526	1388	9687.75	7768.91	5250.59	1558.12	2548.07	1784.24	2234.56	26.797	92.383	156.869	220.626	26.926	20.086	22.303	29.034	-170.124	7139.68	5984.66	3016.03
527	3871	10633.5	5586.56	6176.47	1465.75	2456.07	1611.56	1856.47	26.885	92.347	156.998	220.914	27.009	19.926	21.973	28.716	2405.25	8177.46	3975	4320
528	2166	9890.56	3810.92	5190.59	1847.75	2354.67	1535.71	1897.35	27.01	92.273	157.108	220.823	26.889	20.305	22.145	28.791	318.25	7535.89	2275.21	3293.24
529	2919	13328.3	7092.44	6338.82	1200.88	2219.13	2150.32	1900.73	27.18	92.191	157.071	220.811	27.003	20.323	22.269	28.957	1718.12	11109.2	4942.12	4438.09
530	2574	7264.06	3527.73	12601.2	1944.5	2148.09	1851.58	2340.74	27.084	92.201	157.075	220.705	26.817	20.077	22.145	28.912	629.5	5115.96	1676.15	10260.4
531	1938	8360.44	2603.36	8695.29	2075.88	1963.1	1430.36	1912.21	27.078	92.322	157.223	221.025	26.959	20.022	21.998	28.69	-137.874	6397.34	1173	6783.09
532	2414	9806.23	4787.4	3903.53	1897	1347.39	1789.29	1858.23	27.11	92.192	157.159	220.822	27.041	20.058	22.029	28.728	517	8458.83	2998.11	2045.29
533	3998	8522.09	6109.24	6391.77	1759.38	1750.63	1603.99	1975.73	27.111	92.321	156.862	220.867	26.945	20.276	22.02	29.114	2238.62	6771.46	4505.25	4416.03
534	2067	8640.56	5003.36	7920	1842.38	2147.59	1811.56	2053.24	26.821	91.989	156.997	220.871	27.056	20.09	22.021	29.069	224.625	6492.97	3191.81	5866.77
535	1343	7940.76	3103.36	8258.82	2015.75	1323.29	2123.32	2138.09	27.021	92.123	156.938	220.871	26.893	20.093	21.953	28.774	-672.749	6617.47	980.042	6120.73
536	3284	5929.72	4874.79	9501.18	1823.88	2375.38	1455.04	1853.09	27.254	92.347	157.114	220.912	26.681	19.938	22.157	28.627	1460.12	3554.34	3419.75	7648.09
537	2163	6547.19	3954.62	9100	1444.5	1776.61	1773	1943.53	26.999	92.023	157.012	220.722	26.887	20.108	22.138	28.529	718.5	4770.58	2181.62	7156.47
538	4774	10059.2	4584.87	14489.4	1578.5	1897.97	1858.4	1776.32	27.112	92.347	156.869	220.941	27.189	20.257	22.15	28.864	3195.5	8161.27	2726.47	12713.1
539	2126	10872.5	4844.54	10210.6	1545	1653.87	1561.87	1640.15	26.898	92.315	156.906	220.787	26.968	20.332	22.005	29.052	581	9218.62	3282.67	8570.44
540	1926	11923.7	4983.19	6083.53	1762.75	1552.59	1706.62	1926.62	27.12	92.366	157.06	220.787	26.973	20.056	22.144	28.865	163.25	10371.1	3276.58	4156.91
541	3836	8667.67	3479.83	7104.71	1958	2055.72	1376.47	2116.76	26.861	92.104	157.126	220.894	26.811	20.076	21.988	28.724	1878	6611.95	2103.36	4987.94
542	3384	9611.45	3778.99	9417.65	1407.5	1886.42	1382.46	2015.88	26.931	92.235	157.156	220.684	26.968	19.999	22.282	28.837	1976.5	7725.02	2396.53	7401.77
543	2011	3075.3	1254.62	4282.35	1797.38	2062.37	1752.52	2123.38	26.777	91.801	156.855	220.766	26.911	20.039	21.908	28.575	213.625	1012.93	-497.898	2158.97
544	2552	2621.49	2561.34	1225.88	1994.12	1582.58	1890.65	1911.47	26.928	91.88	157.051	221.001	27.029	20.097	21.654	29.038	557.875	1038.91	670.693	-685.587
545	1381	2006.02	1806.72	1140	1768.62	1560.24	1997.27	2387.79	27.026	91.999	156.745	220.868	27.066	20.14	21.983	28.951	-387.624	445.783	-190.545	-1247.79
546	1302	2085.34	1129.41	1270.59	1677.12	1681.73	1702.63	1823.23	27.065	92.254	156.758	221.111	27.185	19.953	21.766	29.08	-375.124	403.614	-573.213	-552.646
547	1095	1948.8	2102.52	1022.35	1639.25	1871.74	1942.44	1738.68	26.913	91.928	157.317	220.895	27.051	20.076	22.288	29.245	-544.249	77.058	160.084	-716.323
548	3270	998.996	2073.11	892.941	1862.88	1885.79	1386.66	1507.35	27.044	92.135	156.92	221.098	27.047	20.155	22.051	29.05	1407.12	-886.796	686.45	-614.411
549	2624	2605.42	2668.07	2241.18	1442.38	2016.57	1503.36	1946.03	27.02	91.983	156.85	221.049	26.78	20.378	22.142	29.291	1181.62	588.855	1164.71	295.147
550	817	1417.67	2908.4	657.647	1508.12	1844.63	1575.73	1929.12	26.843	92.131	157.051	221.035	26.902	19.98	22.004	29.007	-691.124	-426.957	1332.67	-1271.47
551	1840	1917.67	2577.31	767.059	1363.25	1518.83	1537.61	1491.18	26.808	91.962	156.862	221.12	27.03	19.767	21.711	28.97	476.75	398.845	1039.71	-724.117
552	732	2164.66	1532.77	2140	1709.25	1659.76	1603.36	2159.41	26.986	92.232	156.862	221.065	26.899	19.914	22.1	29.029	-977.249	504.895	-70.587	-19.411
553	1559	669.679	2091.6	2176.47	1812	2143.2	1553.99	1556.62	26.975	91.85	157.128	220.664	26.894	19.895	21.99	29.009	-252.999	-1473.52	537.605	619.853
554	1219	2181.73	2836.13	2527.06	1400.12	1564.26	2163.66	1665.59	26.941	91.992	156.902	221.017	27.138	20.305	22.057	28.811	-181.124	617.47	672.479	861.471
555	2486	346.386	1830.25	1509.41	1336.88	1511.42	1779.83	1667.94	27.114	92.012	156.906	220.954	27.141	19.876	21.8	28.838	1149.12	-1165.03	50.42	-158.528
556	1682	875.502	680.672	2276.47	1886.12	1965.36	1512.39	1630	26.905	91.765	157.006	221.249	27.112	19.825	22.111	28.787	-204.124	-1089.86	-831.722	646.471
557	1673	1887.55	756.303	1536.47	1188.25	2292.67	1716.91	2225.74	27.131	92.185	157.092	220.818	26.982	19.985	22.149	29.016	484.75	-405.119	-960.608	-689.264
558	1777	2158.64	1827.73	2281.18	2257.38	1835.47	2027.21	1674.41	27.114	92.275	156.78	221.266	27.081	20.087	21.944	29.067	-480.374	323.168	-199.474	606.765
559	1238	684.739	1130.25	2080	1713.25	1735.07	1324.37	1378.38	26.753	91.858	157.168	220.741	26.906	20.159	22.058	29.125	-475.249	-1050.33	-194.117	701.618
560	1178	1300.2	1369.75	1735.29	1803.75	2090.11	1719.43	2115.88	27.128	92.126	157.16	221.066	26.786	19.944	22.09	28.935	-625.749	-789.909	-349.684	-380.587
561	2004	1868.47	1923.53	2154.12	1927	1601.03	1643.07	1900.73	26.932	92.373	157.091	221.053	26.882	20	22.084	28.989	77	267.445	280.462	253.382
562	2876	1460.84	1033.61	1591.77	1816.62	1468.25	1612.71	1908.82	26.99	91.967	156.98	220.995	27.042	20.006	21.938	29.233	1059.38	-7.404	-579.096	-317.058
563	739	3019.08	1986.56	1976.47	1654.62	1499.75	1736.03	1350.73	26.901	91.827	156.91	221.261	27.006	19.899	21.851	29.29	-915.624	1519.33	250.525	625.735
564	344	1138.55	859.664	1452.94	1606.62	1943.27	1306.09	1655.59	27.215	92.138	156.978	221.033	26.772	19.909	21.831	29.003	-1262.62	-804.718	-446.428	-202.646
565	1972	1907.63	2492.44	1412.94	1760.62	1904.99	1778.05	1404.71	26.996	91.971	157.233	221.07	27.272	19.984	22.098	28.779	211.375	2.636	714.391	8.235
566	1075	1364.46	1604.2	1290.59	1870.62	1389.06	1807.98	1620.29	27.176	91.845	156.866	220.905	26.819	19.924	21.927	29.273	-795.624	-24.597	-203.781	-329.705
567	2231	1280.12	1034.45	745.882	1595.5	1844.88	1574.79	1490.44	27.024	92.083	156.827	220.989	26.838	20.091	21.927	29.074	635.5	-564.758	-540.335	-744.558
568	1310	532.129	2146.22	1729.41	1544.62	1784.76	1340.65	1506.32	27.23	92.036	156.988	220.964	26.906	20.269	21.869	28.972	-234.624	-1252.63	805.567	223.088
569	2055	902.61	1487.39	1517.65	1391.12	1638.55	1663.97	1529.12	26.903	92.278	156.953	220.813	27.114	20.281	21.781	29.058	663.875	-735.943	-176.575	-11.47
570	1761	1536.14	2370.59	2055.29	1347.38	1709.46	1575.42	1745.73	26.892	91.89	156.929	221.329	27.392	20.087	22.004	28.794	413.625	-173.317	795.168	309.559
571	648	1763.05	762.185	1363.53	1472.88	1665.66	1791.6	1731.62	27.118	91.901	156.992	221.115	26.78	20.008	22.259	28.982	-824.874	97.39	-1029.41	-368.087
572	1024	1339.36	917.647	1180	1959.5	1515.56	1539.39	1591.18	27.198	92.028	156.946	221.133	27.25	20.017	22.059	28.852	-935.499	-176.204	-621.743	-411.175
573	865	1830.32	1092.44	1963.53	1657.88	1306.35	1591.39	1864.12	27.073	91.98	157.107	220.754	27.176	19.934	22.027	29.156	-792.874	523.971	-498.949	99.412
574	2090	993.976	2741.18	1560	1421.75	1588.86	1518.07	1645.44	27.151	92.027	156.724	220.711	26.807	19.869	22.095	29.086	668.25	-594.879	1223.11	-85.44
575	2415	1304.22	2029.41	1843.53	1455.38	1840.86	1678.57	1752.79	27.181	91.999	157.079	221.177	26.888	20.058	22.023	28.964	959.625	-536.646	350.84	90.735
576	1571	3918.68	3158.82	1589.41	1933.5	1771.08	1501.89	1596.32	26.933	91.58	157.074	220.884	26.957	19.744	21.437	28.829	-362.499	2147.59	1656.93	-6.911
577	2144	1726.91	2546.22	1089.41	1620.25	1777.48	1537.61	1753.82	27.291	92.021	157.155	220.83	27.025	19.904	21.838	29.113	523.75	-50.576	1008.61	-664.411
578	2128	764.056	1211.77	1884.71	1433.25	2208.84	1988.44	1490.73	26.917	91.943	157.067	221.316	26.628	20.102	21.938	28.84	694.75	-1444.78	-776.68	393.971
579	1291	680.723	988.235	1031.77	1734.5	1601.41	1476.79	1517.35	27.052	91.93	157.009	221.143	27.247	19.937	21.989	28.956	-443.499	-920.682	-488.549	-485.587
580	632	1484.94	921.849	1458.82	2031.62	1749.62	1866.18	2260.74	26.886	92.098	156.927	221.107	27.039	19.885	22.168	28.779	-1399.62	-264.683	-944.327	-801.911
581	873	838.353	2226.89	222.353	1401.5	1399.1	1630.46	1772.94	27.216	91.81	156.944	220.885	26.874	19.988	21.973	28.979	-528.499	-560.742	596.429	-1550.59
582	1924	1111.45	1271.43	937.647	1554.38	1694.15	1933.61	1377.06	26.913	91.823	157	221.294	26.59	19.925	21.879	28.699	369.625	-582.705	-662.184	-439.411
583	993	1156.63	2297.48	1335.29	1363.88	1754.39	1548.42	1624.71	27.05	92.193	157.217	220.787	27.004	19.929	22.005	28.825	-370.874	-597.765	749.055	-289.411
584	1295	1081.33	1466.39	1351.77	2028.25	1348.77	2062.61	1565.59	26.83	91.956	156.935	220.979	26.878	20.101	21.831	29.002	-733.249	-267.444	-596.217	-213.823
585	1188	1163.65	1942.86	798.824	1792.12	1576.31	1880.99	1456.77	27.049	92.165	157.046	220.96	26.803	20.29	21.966	28.783	-604.124	-412.65	61.87	-657.94
586	1965	1534.14	804.202	728.235	1553.75	1892.7	1805.15	1554.71	27.107	91.949	157.105	221.167	27.045	20.089	21.764	28.961	411.25	-358.558	-1000.94	-826.47
587	1281	2210.84	1905.04	1134.12	1250.5	1603.41	1678.57	1729.85	27.186	92.011	156.816	221.179	27.127	19.984	21.779	29.057	30.5	607.43	226.471	-595.734
588	1827	1747.99	2197.48	1675.29	1745.75	1779.12	1237.18	1914.41	26.948	92.056	157.349	220.898	27.064	19.975	21.998	28.932	81.25	-31.123	960.294	-239.117
589	641	2082.33	2668.91	309.412	1798.88	1458.58	1429.52	1742.06	26.835	91.876	157.199	220.969	26.892	20.126	22.067	28.996	-1157.87	623.745	1239.39	-1432.65
590	551	1902.61	1884.87	2255.29	1500.62	1425.58	1739.92	1300.88	27.064	92.102	156.841	221.181	27.074	20.263	21.834	28.826	-949.624	477.033	144.958	954.412
591	967	1889.56	1746.22	654.118	1568.5	1513.43	1722.69	2220.59	27.1	91.886	156.844	221.01	26.783	20.072	21.98	29.151	-601.499	376.13	23.529	-1566.47
592	550	2142.57	2228.57	1142.35	1794.38	1424.07	1878.26	1466.77	26.832	91.996	156.926	221.089	27.002	19.82	22.059	29.157	-1244.37	718.499	350.315	-324.411
593	1446	1568.27	2480.67	2020	1963	1373.24	1419.85	1521.62	26.949	92.077	157.187	220.859	27.239	20.124	21.918	29.019	-516.999	195.03	1060.82	498.382
594	583	1185.74	1447.9	2287.06	1799.12	1681.73	1052.94	1543.82	26.902	92.012	157.009	220.929	26.933	19.842	21.853	28.64	-1216.12	-495.983	394.958	743.235
595	3067	866.466	973.95	1638.82	1397.5	1394.58	1550.53	1856.47	27.306	92.049	156.923	221.033	26.945	19.873	22.281	29.164	1669.5	-528.111	-576.575	-217.646
596	1947	2732.93	2106.72	494.118	1463.12	1231.3	1657.46	1432.94	27.185	92.184	156.84	221.087	27.016	20.066	22.023	28.998	483.875	1501.63	449.265	-938.823
597	2444	2790.16	1258.82	1609.41	1649.62	1606.93	1708.82	1828.82	27.034	91.873	157.191	221.225	26.93	20.017	22.09	29.001	794.375	1183.23	-449.999	-219.411
598	835	1628.51	1342.02	932.941	1889.62	1762.17	1584.66	1455.73	26.895	92.045	156.867	220.873	26.876	20.157	22.157	28.718	-1054.62	-133.659	-242.646	-522.793
599	1535	1519.08	1996.64	1095.29	1704.75	1495.61	1370.27	2084.85	26.904	92.126	156.933	221.092	26.88	19.935	21.937	28.823	-169.749	23.469	626.366	-989.558
600	1235	1557.23	1580.67	2224.71	1559.12	1352.91	1674.16	1551.18	26.76	91.95	157.109	220.661	26.925	20.355	22.061	29.025	-324.124	204.317	-93.486	673.529
601	2178	3146.59	862.185	2370.59	1814.38	1611.07	1543.7	1637.5	26.704	92.15	157.061	220.928	27.123	19.774	22.172	29.069	363.625	1535.52	-681.512	733.088
602	746	1329.32	1534.45	1292.94	1940	1673.69	1684.77	1704.56	27.224	91.957	156.875	220.979	26.912	19.859	21.787	28.999	-1194	-344.377	-150.314	-411.617
603	2472	905.622	1567.23	2400	1328.5	1784.89	1411.24	1553.38	26.889	91.894	156.992	220.717	27.351	19.863	21.853	29.091	1143.5	-879.266	155.987	846.618
604	1483	1835.34	1820.17	2257.65	2018.12	1426.71	1474.16	1367.5	27.17	92.024	156.797	221.206	26.839	20.005	22.121	28.98	-535.124	408.635	346.008	890.147
605	1503	1592.37	1565.55	2856.47	1751.62	2272.97	1300.53	1948.53	26.989	92.166	157.091	220.987	26.925	19.998	21.775	28.998	-248.624	-680.596	265.021	907.941
606	1935	2389.56	1335.29	1747.06	1715.12	1814.63	1711.77	1497.94	27.276	92.049	156.756	220.769	26.997	20.155	22.147	28.822	219.875	574.925	-376.47	249.118
607	1517	1240.96	2256.3	1011.76	2224	2393.45	1936.56	1788.38	26.754	91.688	156.711	220.98	26.968	20.032	22.084	29.06	-706.999	-1152.48	319.748	-776.617
608	1000	2506.02	935.294	2445.88	1891.38	2019.83	1676.15	1466.77	26.881	92.077	156.952	220.858	27.06	19.998	22.191	28.929	-891.374	486.195	-740.86	979.118
609	978	603.414	906.723	2341.18	1635.88	1954.07	1762.92	1973.53	26.965	91.869	156.989	220.671	26.927	20.053	21.865	28.814	-657.874	-1350.65	-856.196	367.647
610	2119	1088.35	1241.18	615.294	1304.25	1370.86	1869.54	2125.15	27.097	91.802	157.021	220.981	27.137	19.985	21.955	28.986	814.75	-282.504	-628.36	-1509.85
611	1938	849.398	795.798	804.706	1648.62	1743.98	1744.54	1636.77	26.879	91.99	157.031	221.254	27.156	20.084	21.941	28.779	289.375	-894.577	-948.738	-832.058
612	1908	1394.58	1605.88	1491.77	1580.75	1553.71	1359.66	1277.65	27.023	92.134	157.22	220.987	27.023	20.092	22.191	28.98	327.25	-159.136	246.218	214.118
613	1412	2038.15	2500.84	450.588	1949.38	1794.68	1982.88	1695.59	27.069	92.015	156.898	221.052	27.074	20.275	21.887	28.93	-537.374	243.474	517.962	-1245
614	1891	1581.33	1522.69	569.412	1465.5	1724.52	1540.34	1913.09	26.997	92.275	156.961	220.768	27.015	19.887	22.217	28.837	425.5	-143.197	-17.646	-1343.67
615	1374	1969.88	2869.75	2010.59	1876	1772.72	1882.46	1847.35	26.995	92.134	157.268	221.114	26.883	20.114	22.044	29.077	-501.999	197.164	987.29	163.235
616	1993	1485.94	1179.83	2584.71	1402.12	2124.5	1558.93	1366.91	27.33	91.945	156.941	220.715	26.895	20.115	21.814	29.428	590.875	-638.553	-379.096	1217.79
617	1737	1802.21	2449.58	3217.65	1509.62	1571.79	1759.77	1606.18	27.168	92.172	157.074	221.07	26.851	19.905	21.787	29.245	227.375	230.422	689.811	1611.47
618	1916	2102.41	1770.59	2714.12	1688.38	1984.94	1868.49	1620.73	26.629	91.88	156.771	220.967	26.866	19.915	22.099	29.069	227.625	117.47	-97.898	1093.38
619	1037	1078.31	1315.97	1284.71	1450.12	1742.22	1958.4	2302.5	26.97	91.963	157.01	220.799	27.135	19.919	21.967	28.752	-413.124	-663.905	-642.436	-1017.79
620	1063	1101.41	1718.49	914.118	2025.75	1300.2	1684.14	1982.94	27.015	92.165	156.9	220.812	27.053	20.047	22.14	28.787	-962.749	-198.794	34.349	-1068.82
621	2377	1537.15	2011.77	2698.82	1707.75	1916.67	1994.54	1420.88	27.008	92.048	156.997	221.132	26.908	19.873	22.064	28.884	669.25	-379.517	17.227	1277.94
622	2522	1153.61	1951.26	320	1437	1510.54	1787.29	1162.94	27.081	91.788	157.279	220.972	26.752	20.16	21.954	29.1	1085	-356.927	163.971	-842.94
623	2414	2801.2	1565.55	970.588	1476.25	1539.91	1313.44	2323.09	27.034	92.11	157.259	220.875	26.878	19.83	21.737	28.866	937.75	1261.3	252.101	-1352.5
624	1435	1864.46	794.958	1151.77	1325.25	1518.07	1500	1461.32	26.999	91.697	157.136	221.095	27.23	19.789	22.061	29.063	109.75	346.386	-705.041	-309.558
625	1873	1880.52	2207.56	1005.88	1643.62	1568.4	1990.34	1523.68	27.165	91.907	157.001	221.048	27.045	20.087	21.838	29.074	229.375	312.123	217.227	-517.793
626	740	2409.64	1652.1	1660	2172.5	1530.62	1733.09	1716.62	26.952	92.08	157.107	220.915	26.891	19.743	21.741	28.89	-1432.5	879.016	-80.986	-56.617
627	1993	1212.85	1638.65	395.294	1716.62	1285.39	1504.83	1280.88	27.124	92.138	157.12	221.062	27.012	19.827	21.963	28.868	276.375	-72.539	133.824	-885.587
628	1495	1997.99	2108.4	1274.12	1540.25	1684.86	1935.71	1687.21	27.175	91.783	156.97	221.295	26.934	19.824	21.95	29.06	-45.249	313.128	172.689	-413.087
629	1407	2073.29	1007.56	1467.06	1524.88	1878.01	1761.77	1332.21	27.088	92.253	157.13	221.206	27.159	20.123	22.057	29.039	-117.874	195.281	-754.201	134.853
630	1889	1222.89	1610.08	1989.41	1881.25	1528.24	1241.81	1261.18	26.938	92.059	156.931	220.922	26.638	20.268	22.089	28.851	7.75	-305.345	368.277	728.235
631	3350	1703.82	1562.18	1163.53	1583.38	1383.53	1615.55	1357.5	26.926	92.213	156.944	220.851	26.686	20.194	21.801	28.989	1766.62	320.281	-53.36	-193.97
632	1699	1431.73	1380.67	2180	1723.75	1855.92	1555.36	2350.88	27.312	91.78	157.176	221.147	26.72	19.816	21.901	29.215	-24.749	-424.196	-174.684	-170.881
633	940	1109.44	1631.93	1071.77	1837.62	1869.1	1740.55	1966.47	27.139	91.887	156.812	220.923	27.053	19.635	22.193	28.999	-897.624	-759.663	-108.612	-894.705
634	1213	2436.75	1273.95	1710.59	1720.62	1647.72	1432.56	2038.09	27.127	91.718	156.882	220.975	26.919	19.908	21.75	29.136	-507.624	789.031	-158.612	-327.499
635	1047	2339.36	730.252	2135.29	1805.75	1493.47	1591.18	1725.29	27.046	92.337	156.843	221.169	27.052	20.266	21.865	29.017	-758.749	845.884	-860.923	410
636	1475	641.566	2705.04	1863.53	1654	1832.08	2034.56	1478.53	26.889	92.073	157.011	220.999	27.108	20.186	21.88	28.998	-178.999	-1190.51	670.483	385
637	1516	1192.77	1112.61	740	1486.38	2242.22	1789.39	1823.68	26.875	91.993	157.051	221.006	27.089	20.227	21.881	28.946	29.625	-1049.45	-676.785	-1083.67
638	1494	1836.35	1225.21	1418.82	1418.88	1548.44	1627.63	1466.77	27.08	92.097	157.016	221.055	27	19.78	21.868	28.835	75.125	287.902	-402.415	-47.94
639	1884	1443.78	2087.39	1320	1695.62	1840.74	1743.17	1623.09	26.814	91.941	157.34	221.17	27.154	20.156	22.167	29.174	188.375	-396.962	344.223	-303.087
640	1516	825.301	1210.92	2150.59	2067.88	2042.42	1771.11	2219.85	26.81	92.11	157.025	220.741	27.181	19.966	22.023	28.937	-551.874	-1217.12	-560.188	-69.264
641	1011	828.313	1485.71	2405.88	1307.62	1286.02	1803.05	1615.29	26.894	91.897	157.281	221.076	27.107	20.052	22.37	28.911	-296.624	-457.705	-317.331	790.588
642	1692	1418.67	1376.47	2091.76	1482.25	1573.92	2055.25	1721.91	27.272	92.037	157.001	221.138	27.029	19.744	21.873	29.006	209.75	-155.245	-678.781	369.853
643	1263	3338.35	2515.13	582.353	1906.38	1549.57	1816.7	1851.62	27.024	92.24	157.238	220.778	27.05	19.839	21.934	28.789	-643.374	1788.78	698.424	-1269.26
644	3235	2451.81	1457.98	2123.53	1576.25	1740.71	1980.25	1871.47	27.005	92.065	157.171	220.897	26.944	19.715	22.072	29.272	1658.75	711.094	-522.268	252.059
645	913	2501	1185.71	625.882	2373.12	1603.92	1792.02	1914.41	26.987	92.018	157.233	220.952	27.261	20.187	22.137	28.903	-1460.12	897.088	-606.302	-1288.53
646	2469	1341.37	2147.06	2222.35	1587.25	1881.4	1912.39	1947.5	27.228	91.966	157.092	220.973	26.788	20.015	21.905	29.098	881.75	-540.034	234.664	274.853
647	2116	2787.15	1517.65	1920	1706.75	2071.54	1200.73	1716.62	27.139	92.196	156.987	220.747	26.762	19.836	21.795	29.116	409.25	715.612	316.912	203.382
648	2532	1700.8	2020.17	2301.18	1894.5	1787.02	2392.54	1377.06	27.041	92.202	157.005	220.849	27.034	19.932	21.977	29.18	637.5	-86.219	-372.373	924.118
649	690	705.823	1744.54	1829.41	1446.38	1668.67	1625	1549.27	27.142	91.882	156.889	221.115	27.018	20.255	22.168	28.706	-756.374	-962.85	119.538	280.147
650	1930	3069.28	2979.83	776.471	1636.88	1993.22	1266.91	1644.27	26.811	91.851	156.869	220.999	26.657	19.713	22.226	29.196	293.125	1076.05	1712.92	-867.793
651	1657	890.562	921.849	1402.35	1343	1386.67	1868.49	1633.53	27.167	91.986	157.009	221.069	26.785	19.86	21.925	29.005	314	-496.108	-946.638	-231.175
652	2818	2240.96	669.748	1880	1944.5	1896.84	1760.29	1480.88	27.26	91.947	157.013	220.55	27.167	19.865	22.199	28.618	873.5	344.127	-1090.55	399.118
653	2024	1897.59	1255.46	1411.77	1462.38	1646.71	1670.06	1429.71	26.638	91.86	156.886	220.829	26.947	20.067	22.174	28.971	561.625	250.879	-414.6	-17.94
654	3096	1334.34	2403.36	1594.12	1606.38	1635.92	2145.17	1970	27.01	91.825	157.012	221.168	27.103	19.71	21.786	28.834	1489.62	-301.58	258.193	-375.881
655	2221	631.526	1470.59	1742.35	1283.25	1918.67	1607.88	2226.03	26.987	92.005	157.106	220.783	27.005	19.983	21.722	28.857	937.75	-1287.15	-137.289	-483.675
656	787	1205.82	2553.78	1485.88	1638.38	1855.3	2037.92	1408.09	27.173	91.919	156.949	220.877	27.142	20.092	22.157	28.807	-851.374	-649.472	515.861	77.794
657	1898	2595.38	1417.65	1156.47	1967.12	1711.97	1967.23	1401.32	27.049	92.302	156.835	220.907	27.102	19.776	21.937	28.955	-69.124	883.409	-549.579	-244.852
658	1655	1037.15	1047.06	2752.94	1555.75	1547.69	1351.58	1737.5	26.714	91.82	157.085	221.038	26.77	20.191	21.856	28.9	99.25	-510.541	-304.516	1015.44
659	878	2347.39	989.916	1968.23	1576.88	1595.01	1321.22	1955.59	27.206	92.18	157.206	221.162	26.978	20.203	22.005	28.986	-698.874	752.385	-331.302	12.647
660	765	2197.79	1214.29	1512.94	1790.75	2012.3	2069.75	1930.15	26.797	91.967	156.979	221.192	27.054	20.249	21.883	28.924	-1025.75	185.492	-855.461	-417.205
661	1949	1202.81	1803.36	3797.65	2003.25	2095.63	1552.21	1343.53	27.187	91.836	157.197	220.785	27.107	20.244	21.803	28.804	-54.249	-892.82	251.155	2454.12
662	866	1826.31	1958.82	1685.88	1865.25	1766.44	1601.79	1505.73	27.238	91.788	156.985	221.053	27.09	19.925	22.013	29.03	-999.249	59.864	357.038	180.147
663	1396	939.759	1843.7	1487.06	1710	1974.4	1702.42	1680.88	26.98	91.99	156.939	221.116	26.765	19.804	21.883	28.965	-313.999	-1034.64	141.282	-193.823
664	3441	1021.08	2414.29	2770.59	1656.38	2006.15	1431.51	1327.21	27.322	92.179	157.122	220.78	26.883	19.926	22.38	28.796	1784.62	-985.064	982.773	1443.38
665	2602	2548.19	1538.65	1696.47	1502.62	1905.12	1615.44	1805.44	26.827	92.097	156.99	221.136	26.857	19.997	21.922	29.061	1099.38	643.072	-76.785	-108.97
666	1126	2446.79	742.017	580	1870.62	1604.67	1767.33	1521.47	26.951	92.205	156.999	220.97	27.152	20.164	22.026	28.958	-744.624	842.118	-1025.31	-941.47
667	1802	839.357	896.639	910.588	2021.62	2033.51	1556.09	1683.09	27.245	91.942	157.019	221.13	26.923	19.936	21.994	29.209	-219.624	-1194.15	-659.453	-772.499
668	2357	2250	2002.52	2408.24	2731	2074.55	1497.9	1973.68	26.989	92.138	156.781	220.879	27.029	20.122	21.881	28.888	-373.999	175.452	504.622	434.559
669	1653	3564.26	1226.05	1651.77	1697.38	1813.76	1612.39	1628.82	27.235	92.247	156.936	220.855	26.876	20.146	21.971	28.973	-44.374	1750.5	-386.344	22.941
670	2321	1325.3	1869.75	2904.71	1683.62	1622.74	1933.82	1312.21	27.098	91.999	156.739	221.057	26.99	19.897	22.037	29.166	637.375	-297.439	-64.075	1592.5
671	830	1348.39	1902.52	1875.29	1601	1403.74	1459.24	1732.79	27.09	92.01	157.265	221.032	27.016	20.02	22.168	28.987	-770.999	-55.345	443.277	142.5
672	1474	975.904	1784.87	2110.59	1787.75	1544.43	1437.5	1664.27	27.102	92.142	156.827	220.731	26.8	20.348	21.849	29.12	-313.749	-568.523	347.374	446.324
673	1015	1990.96	2297.48	849.412	1339.62	2116.84	1765.34	1267.06	26.893	91.886	156.647	220.866	26.877	20.02	21.857	29.184	-324.624	-125.878	532.143	-417.646
674	761	1038.15	1957.98	761.176	1715	2049.95	1599.89	1584.85	27.091	92.21	156.995	220.976	27.072	20.186	22.326	28.825	-953.999	-1011.8	358.088	-823.675
675	1635	1625.5	633.613	1132.94	1563.25	2233.56	1337.71	1646.77	26.775	91.817	156.882	221.278	26.98	19.796	21.881	29.011	71.75	-608.056	-704.096	-513.823
676	2251	1171.69	373.95	1755.29	1182.75	1808.23	1462.29	1489.12	27.305	92.19	157.151	220.901	26.778	19.836	22.061	29.205	1068.25	-636.545	-1088.34	266.176
677	1401	2189.76	2103.36	1537.65	1790.62	1896.34	1490.34	1932.65	26.939	92.088	156.914	221.066	26.846	19.89	22.088	29.281	-389.624	293.424	613.025	-394.999
678	608	1029.12	1468.07	2981.18	1568.88	1650.6	2007.46	1956.03	27.047	91.896	157.042	221.148	26.936	20.145	21.958	29.071	-960.874	-621.485	-539.39	1025.15
679	1793	1799.2	1015.97	1611.77	1619.75	1776.48	1083.09	1728.38	26.894	92.371	156.995	221.116	26.918	20.023	22.031	28.913	173.25	22.716	-67.121	-116.617
680	1229	2348.39	698.319	548.235	1937.12	1648.34	1714.29	1261.18	27.154	92.006	156.867	220.99	27.165	19.901	22.077	28.86	-708.124	700.05	-1015.97	-712.94
681	1907	1047.19	3394.12	2209.41	1739.12	1579.82	1505.04	1380.29	27.024	91.983	156.812	221.274	27.011	20.051	22.259	29.027	167.875	-532.63	1889.08	829.118
682	1790	2091.36	1690.76	1647.06	1874.62	1357.81	1537.08	1642.79	26.876	92.126	157.053	221.115	27.139	19.92	21.872	29.048	-84.624	733.559	153.676	4.265
683	2153	2440.76	1498.32	2501.18	1892.38	1557.23	1500	1413.97	26.995	91.837	156.887	221.139	27.223	19.829	22.065	28.898	260.625	883.534	-1.68	1087.21
684	2456	1243.98	1579.83	1896.47	1945.25	1800.33	1571.22	1585	26.936	92.008	156.923	220.796	26.958	20.158	22.011	28.91	510.75	-556.349	8.613	311.471
685	2561	2013.05	2094.96	1104.71	1882.12	1776.61	1832.88	1532.35	27.112	91.772	157.284	220.979	26.992	20.071	22.069	28.999	678.875	236.446	262.08	-427.646
686	1996	3019.08	1054.62	2318.82	2069.88	1774.6	1580.67	1654.71	27.274	92.136	157.242	221.082	26.629	19.989	22.054	29.019	-73.874	1244.48	-526.049	664.118
687	977	2752.01	1667.23	1610.59	1660.25	2045.68	1637.82	1849.41	26.903	91.703	157.078	221.261	27.006	20.119	21.997	29.246	-683.249	706.325	29.412	-238.823
688	804	2659.64	1323.53	1471.77	1568.75	1739.33	1692.23	1684.85	27.221	92.314	156.929	221.093	26.933	20.192	21.76	28.897	-764.749	920.306	-368.696	-213.087
689	3732	1174.7	1389.92	821.176	1556.5	1804.72	1463.23	1369.56	27.318	92.049	157.087	221.107	26.914	19.692	22.129	28.885	2175.5	-630.019	-73.318	-548.381
690	2798	824.297	2001.68	1036.47	2217.12	1916.67	1732.98	2120.44	26.838	92.002	157.02	221.2	26.724	19.832	21.942	28.952	580.875	-1092.37	268.697	-1083.97
691	1762	1491.97	1650.42	1475.29	1899.5	1798.07	1774.27	1675	26.976	91.792	156.968	221.013	27.072	20.092	21.866	28.831	-137.499	-306.098	-123.844	-199.705
692	391	2158.64	1098.32	4198.82	1341.88	1314.13	1422.58	1598.97	26.966	91.937	156.916	220.993	26.884	19.882	21.993	28.995	-950.874	844.503	-324.264	2599.85
693	806	1198.8	1668.91	2494.12	1729	1728.41	1438.55	1885.29	27.169	92.101	157.016	221.236	26.903	19.788	21.715	28.893	-922.999	-529.617	230.357	608.824
694	1919	2424.7	1558.82	624.706	1697.12	1293.93	1872.48	2168.82	27.095	92.216	157.117	221.041	26.851	20.027	22.102	28.886	221.875	1130.77	-313.654	-1544.12
695	897	2518.07	1122.69	2536.47	1932	1631.53	1520.9	1465.88	26.999	92.383	157.022	220.8	27.04	19.749	22.003	28.969	-1035	886.546	-398.213	1070.59
696	1027	1594.38	2037.82	1177.65	1816.88	2155.37	1511.13	1062.79	26.882	91.882	156.781	220.969	26.938	20	22.262	28.988	-789.874	-560.993	526.681	114.853
697	2566	1873.49	2863.03	1224.71	2012.88	1600.28	1807.35	1779.56	27.317	91.999	157.231	220.921	26.938	20.066	22.219	28.915	553.125	273.218	1055.67	-554.852
698	1925	978.916	2197.48	1343.53	1581.75	1720.38	1485.92	1669.41	27.075	92.152	157.054	221.032	26.715	20.191	22.047	29.164	343.25	-741.465	711.555	-325.881
699	494	1223.9	1854.62	976.471	1618.12	1848.9	1692.65	1724.27	26.942	91.851	156.833	221.108	27.19	20.118	21.9	28.972	-1124.12	-624.999	161.975	-747.793
700	2071	2345.38	717.647	1140	1769.88	1382.53	1192.54	1744.71	26.9	92.258	157.113	220.992	27.246	20.158	22.025	29.122	301.125	962.851	-474.894	-604.705
701	1584	768.072	900.84	998.824	1861.25	1629.39	1547.37	1733.68	26.728	91.951	156.788	220.97	27.099	19.797	21.816	29.073	-277.249	-861.319	-646.533	-734.852
702	516	1323.29	2898.32	2110.59	1751.25	1812.75	1539.5	1449.27	26.987	92.15	157.004	220.841	27.07	19.933	21.958	29.121	-1235.25	-489.457	1358.82	661.324
703	1890	989.96	1200	2001.18	1079.25	1810.99	1841.18	2043.09	27.03	92.038	156.961	221.238	27.356	20.105	22.019	28.929	810.75	-821.033	-641.175	-41.911
704	1343	1386.55	1465.55	1692.94	1034.88	1361.07	1631.62	1956.62	26.991	92.044	157.128	221.015	26.815	20.088	22.126	29.191	308.125	25.477	-166.07	-263.675
705	2918	919.679	1529.41	4128.23	2006.88	1847.39	1670.27	1504.71	26.742	91.863	157.016	220.961	27.023	20.102	21.943	29.081	911.125	-927.71	-140.86	2623.53
706	1406	1447.79	2468.07	1545.88	1194.25	1666.92	1756.51	1916.91	26.784	91.946	156.86	221.211	26.824	20.289	21.811	28.637	211.75	-219.126	711.555	-371.028
707	1294	1513.05	1308.4	2287.06	1669.12	1502.51	1239.92	1829.56	26.908	91.91	156.978	221.06	26.879	20.105	21.7	28.807	-375.124	10.542	68.487	457.5
708	1581	1410.64	1642.86	2485.88	1528.75	1832.96	1443.38	1801.77	27.167	92.122	157.072	220.744	26.968	20.188	21.706	29.062	52.25	-422.313	199.475	684.118
709	1665	1119.48	1397.48	1568.23	1489.62	2320.78	2324.79	1723.82	27.231	91.882	157.226	221.129	27.257	19.684	22.03	29.26	175.375	-1201.3	-927.31	-155.587
710	2026	1975.9	1173.95	2603.53	1477.88	1715.86	1566.7	1929.85	26.879	92.037	156.729	221.113	27.268	20.209	21.855	29.046	548.125	260.04	-392.751	673.676
711	947	1076.31	2262.18	2098.82	1353.12	1891.82	1818.59	1804.56	26.957	91.821	157.113	220.914	27.228	19.867	21.9	28.91	-406.124	-815.511	443.592	294.265
712	1675	1199.8	1095.8	1223.53	1491	1609.44	1763.13	1623.97	26.785	91.816	156.902	221.015	26.698	20.103	21.898	29.029	184	-409.638	-667.331	-400.44
713	1011	2030.12	1394.96	1531.77	1963.75	1326.18	1970.48	2087.65	26.993	92.054	157.29	221.126	27.113	20.056	22.023	29.008	-952.749	703.941	-575.524	-555.881
714	1373	838.353	1631.93	2022.35	1594.88	1628.01	1974.16	1678.82	26.823	91.87	157.266	220.919	26.993	20.174	22.39	28.961	-221.874	-789.658	-342.226	343.529
715	1298	1737.95	2174.79	1131.77	1646.38	1780.37	1673	1399.56	26.839	92.268	157.015	220.975	26.966	19.918	22.189	28.971	-348.374	-42.419	501.786	-267.793
716	1669	1227.91	2647.06	2092.94	1535.5	1416.92	1279.62	2223.97	26.951	91.985	157.133	220.845	27.241	20.218	22.061	28.929	133.5	-189.005	1367.44	-131.028
717	1272	1015.06	1685.71	837.647	1417.5	1362.7	1533.93	1741.77	27.087	92.083	156.942	220.997	26.664	19.972	22.055	28.827	-145.499	-347.64	151.786	-904.117
718	676	502.008	1128.57	1187.06	1884	1483.06	1570.17	2003.97	27.046	91.96	156.948	221.138	26.973	19.8	21.763	29.105	-1208	-981.048	-441.596	-816.911
719	1842	2149.6	1668.07	2435.29	1454.75	1592.49	1665.34	1680	26.965	92.076	157.035	221.008	26.766	20.122	21.985	29.341	387.25	557.103	2.731	755.294
720	823	1850.4	1761.35	1147.06	1915.12	1534.64	1478.26	1645	26.974	91.794	156.824	220.914	26.892	19.888	22.111	28.692	-1092.12	315.763	283.088	-497.94
721	1120	1896.59	1521.01	542.353	1291.38	1328.31	1427.31	1851.62	27.115	91.963	157.011	221.011	27.29	19.952	22.055	29.018	-171.374	568.273	93.697	-1309.26
722	775	1255.02	1799.16	1668.23	1786.88	1763.68	2117.12	2356.18	26.94	92.085	157.069	221.081	26.951	20.163	21.878	28.816	-1011.87	-508.659	-317.961	-687.94
723	2183	828.313	1275.63	1831.77	1578.25	1354.79	1473.42	1797.06	27.243	91.825	156.876	221.22	27.112	20.102	21.873	28.978	604.75	-526.48	-197.793	34.706
724	1432	1692.77	1133.61	1171.77	1960.12	1580.32	1660.4	1938.53	26.807	91.81	156.87	221.037	27.274	20.093	22.048	29.185	-528.124	112.45	-526.785	-766.764
725	1720	3134.54	1531.93	335.294	1769	2086.72	1387.61	1408.09	26.84	91.951	156.954	220.848	26.814	19.921	21.95	28.782	-48.999	1047.82	144.328	-1072.79
726	1191	195.783	2021.01	1029.41	1482.38	1588.98	1510.82	1491.32	26.816	91.979	156.822	221.316	27.104	20.004	22.14	29.115	-291.374	-1393.2	510.189	-461.911
727	1556	1091.37	2648.74	2329.41	1650.25	1614.21	1840.97	1905.73	26.987	91.843	157.19	221.047	26.833	20.12	22.469	28.908	-94.249	-522.84	807.773	423.676
728	701	1992.97	1157.98	2129.41	2136.75	1413.4	1582.25	1717.79	27.063	92.114	157.098	220.762	27.148	20.074	21.933	29.099	-1435.75	579.568	-424.264	411.618
729	1940	1669.68	659.664	1441.18	1702	1050.45	1592.75	1541.03	27.06	91.799	156.9	220.955	27.458	20.086	22.099	29.024	238	619.227	-933.087	-99.852
730	1403	1045.18	1942.86	1060	1557.25	1344	1861.03	1769.56	27.109	92.296	156.802	220.88	27.154	19.839	22.032	28.994	-154.249	-298.819	81.828	-709.558
731	784	1250	1579.83	555.294	1466.38	1563	1336.35	1959.27	26.972	92.16	157.336	220.981	26.927	20.059	22.156	29.032	-682.374	-313.001	243.487	-1403.97
732	763	694.779	1115.97	2090.59	1659.88	2260.29	1964.18	1685.73	26.951	92.145	156.822	220.683	26.816	20.092	22.168	29.218	-896.874	-1565.51	-848.213	404.853
733	1413	601.406	1179.83	624.706	1607.88	1685.24	1742.02	1118.38	27.047	92.003	157.149	220.996	27.113	20.091	22.005	28.908	-194.874	-1083.83	-562.184	-493.675
734	1764	2339.36	2182.35	281.176	1596.12	1778.36	1208.19	1805.73	27.266	92.197	156.833	221.014	26.636	19.949	22.097	29.166	167.875	560.994	974.16	-1524.56
735	1957	2091.36	1075.63	1763.53	2043	1359.44	1357.35	1617.5	26.776	92.084	157.021	221.021	26.833	20.107	22.032	28.991	-85.999	731.928	-281.722	146.029
736	1958	835.341	1961.35	2398.82	1382.88	1555.6	1452	1344.71	27.317	91.937	156.928	221.125	26.927	20.148	22.157	29.457	575.125	-720.255	509.349	1054.12
737	297	1955.82	2673.11	1255.29	1202.88	1344	1414.39	1659.27	26.949	92.238	157.145	221.134	27.047	19.815	22.047	29.021	-905.874	611.822	1258.72	-403.97
738	1935	740.964	830.252	495.294	1209.62	1561.37	1333.82	2056.76	27.323	91.875	156.778	220.937	27.057	19.931	22.078	29.15	725.375	-820.406	-503.57	-1561.47
739	2332	2931.73	2122.69	720	1362.12	1838.35	1647.37	1899.71	27.344	92.068	157.113	221.013	27.058	20.028	22.256	29.23	969.875	1093.37	475.315	-1179.7
740	2222	2600.4	1187.39	1178.82	1803.12	1521.21	1621.85	1298.23	26.835	92.128	157.115	221.218	27.123	19.788	22.181	28.997	418.875	1079.19	-434.453	-119.411
741	623	1085.34	1805.88	1936.47	2047.75	1775.85	1427.63	1688.23	27	91.861	156.71	220.935	26.888	20.169	21.769	29.145	-1424.75	-690.511	378.256	248.235
742	1295	578.313	2167.23	1680	1946.62	2155.75	1324.27	1366.62	26.804	91.867	157.284	221.121	27.12	19.956	21.968	29.008	-651.624	-1577.43	842.962	313.382
743	576	2651.61	3057.14	1442.35	1697	1796.06	2035.08	1858.53	27.083	92.086	156.947	220.979	27.085	20.157	22.164	29.018	-1121	855.547	1022.06	-416.175
744	2090	2775.1	638.655	1544.71	1669.75	1702.69	1518.07	1684.41	26.844	92.102	156.865	221.165	26.996	19.927	22.059	29.055	420.25	1072.41	-879.411	-139.705
745	1206	1622.49	943.697	990.588	1499.25	1477.54	1423.21	1903.97	27.152	91.771	157.093	220.697	27.106	20.051	22.004	29.101	-293.249	144.955	-479.516	-913.381
746	1275	309.237	1739.5	1701.18	1284.5	1871.23	1506.93	1770.29	27.193	92.004	157.051	220.838	27.219	20.118	22.154	28.971	-9.499	-1562	232.563	-69.117
747	1016	862.45	2505.04	1351.77	1526.62	1536.14	1471.74	1522.06	27.092	91.966	157.079	220.942	27.017	19.989	21.887	29.037	-510.624	-673.694	1033.3	-170.293
748	1696	1619.48	951.261	1696.47	1949.75	1291.92	1949.06	1396.32	26.815	92.131	157.105	221.074	26.805	20.129	21.948	29.082	-253.749	327.56	-997.793	300.147
749	1321	1927.71	1409.24	2668.24	1858.25	1269.33	1348.32	1885.44	27.186	91.989	156.804	221.065	26.951	19.851	21.87	29.068	-537.249	658.384	60.924	782.794
750	2088	656.627	1710.08	2375.29	1591.88	1626	1318.91	1380.59	26.914	92.07	156.6	221.125	27.047	19.849	22.34	28.88	496.125	-969.377	391.176	994.706
751	356	1687.75	534.454	681.176	1571.5	1412.65	1413.13	1621.91	26.935	91.929	156.965	220.921	27.049	19.907	22.124	29.186	-1215.5	275.1	-878.675	-940.734
752	1469	1790.16	2071.43	941.176	1164.88	1470.13	1709.98	1974.85	27.229	91.934	156.9	221.208	26.866	20.116	22.034	28.821	304.125	320.03	361.45	-1033.67
753	1194	1098.39	884.034	963.529	1120.62	1894.33	1779.1	1592.21	27.012	92.041	157.147	221.113	26.86	19.852	22.078	28.94	73.375	-795.933	-895.062	-628.675
754	2400	2091.36	1764.71	1368.23	1467.25	1484.19	1785.82	1786.62	27.063	91.926	157.165	220.987	27.227	19.973	22.134	28.89	932.75	607.179	-21.112	-418.381
755	1096	1790.16	1256.3	797.647	1713.75	1270.33	1786.35	1796.32	27.087	91.928	156.989	220.763	27.105	20.092	21.932	29.073	-617.749	519.829	-530.041	-998.675
756	2425	1641.57	2131.93	1016.47	1556.75	1562.5	1609.87	1175	27.139	91.901	156.98	221.124	26.775	19.809	22.012	29.041	868.25	79.066	522.059	-158.528
757	1046	1587.35	1889.08	1361.18	1279.38	1676.58	1336.66	1378.82	27.136	91.865	157.096	221.163	27.067	20.339	21.879	28.996	-233.374	-89.231	552.416	-17.646
758	420	2272.09	1120.17	1550.59	1568.25	1575.68	1281.83	1715.44	27.055	92.035	157.159	221.138	26.989	20.045	21.878	29.053	-1148.25	696.411	-161.659	-164.852
759	789	1152.61	996.639	895.294	1631.12	1339.98	1588.23	1759.56	26.852	92.228	156.809	221.011	27.198	20.177	22.007	28.96	-842.124	-187.373	-591.596	-864.264
760	2901	2757.03	1144.54	2749.41	1336	1563.88	1801.37	1874.85	27.12	92.13	157.193	221.238	27.375	20.303	21.909	28.572	1565	1193.15	-656.827	874.559
761	1478	1788.15	1133.61	1948.23	1579.38	1866.84	1794.64	2224.56	26.95	91.954	156.896	221.142	26.878	20.237	22.162	28.847	-101.374	-78.689	-661.028	-276.323
762	686	1739.96	1877.31	1608.23	2220.12	2148.34	1598.32	2002.35	26.934	92.107	156.926	220.951	27.023	19.974	22.07	28.935	-1534.12	-408.383	278.992	-394.117
763	2288	2949.8	1347.9	1560	1827.88	1724.02	1780.88	1779.41	27.015	91.876	156.934	220.79	27.012	20.259	22.154	28.803	460.125	1225.78	-432.982	-219.411
764	455	1951.81	1387.39	2460	1915.12	1699.05	1714.08	1914.27	26.917	91.882	157.054	220.698	26.905	20.032	21.866	28.997	-1460.12	252.761	-326.68	545.735
765	2740	669.679	1493.28	595.294	2014.75	1946.54	1505.15	1496.32	27.215	91.99	157.192	220.917	27.023	20.111	22.113	29.056	725.25	-1276.86	-11.869	-901.028
766	1893	1246.99	773.109	1455.29	1956.38	1474.9	1684.66	1784.71	26.726	91.984	157.014	220.795	26.943	19.995	21.942	28.834	-63.374	-227.911	-911.554	-329.411
767	2999	1531.12	1262.18	482.353	1634.25	1784.14	1614.6	1296.77	26.901	92.129	156.826	220.929	27.019	20.099	22.09	28.912	1364.75	-253.011	-352.415	-814.411
768	589	1274.1	1227.73	1955.29	1757.25	1631.65	1781.09	1852.06	27.045	91.831	156.978	220.901	27.063	20.056	22.201	29.148	-1168.25	-357.554	-553.36	103.235
769	817	2944.78	2775.63	3998.82	1348.12	1817.27	1400	1801.03	27.029	91.795	157.24	220.709	26.977	19.97	21.809	29.027	-531.124	1127.51	1375.63	2197.79
770	940	2060.24	852.101	1885.88	1984	2173.82	1243.8	1374.12	26.983	91.926	156.877	220.969	27	20.227	21.949	28.652	-1044	-113.578	-391.701	511.765
771	839	1774.1	1146.22	970.588	1537	1895.21	1477	1378.82	26.962	92.199	157.135	221.035	26.882	20.281	21.912	29.095	-697.999	-121.108	-330.776	-408.234
772	2097	3681.73	2248.74	2335.29	1441.38	1422.06	1805.15	1745.59	27.293	91.902	157.031	221.16	27.009	20.22	21.935	28.743	655.625	2259.66	443.592	589.706
773	1408	947.791	1807.56	1605.88	1394.38	1524.85	1788.13	2033.97	26.864	91.816	156.967	220.646	27.268	19.987	22.174	29	13.625	-577.057	19.433	-428.087
774	1806	476.908	1182.35	981.176	1496.12	1547.94	1675	1463.82	27.071	91.947	157.194	220.917	26.916	19.952	21.759	28.738	309.875	-1071.03	-492.646	-482.646
775	3630	2746.99	1168.91	1687.06	1570.75	2102.41	1541.91	1954.85	27.061	91.769	157.02	221.135	27.317	20.137	22.174	28.923	2059.25	644.578	-373.003	-267.793
776	2085	1407.63	1521.85	1052.94	1446.12	1923.32	1264.18	1633.68	27.32	91.9	156.859	221.082	26.756	19.995	22.013	28.965	638.875	-515.687	257.668	-580.734
777	1472	2227.91	841.176	1409.41	1641.12	1724.77	1614.29	1634.12	27.046	91.925	157.166	221.254	26.872	20.04	22.045	29.081	-169.124	503.138	-773.108	-224.705
778	852	1619.48	916.807	1370.59	1938.62	1482.81	1888.03	1772.94	27.147	92.141	156.827	220.995	26.842	20.111	21.827	29.175	-1086.62	136.672	-971.217	-402.352
779	2818	770.08	1674.79	1242.35	1920	1420.81	1475.32	1567.35	26.957	92.158	157.091	221.192	26.944	20.022	21.841	29.219	898	-650.727	199.475	-324.999
780	512	2765.06	3011.76	1552.94	1603.62	1917.29	1318.59	1139.71	26.823	91.88	156.774	220.743	27.034	19.985	22.149	29.112	-1091.62	847.766	1693.17	413.235
781	2008	916.667	2983.19	2103.53	1981.88	1584.21	1656.72	1039.12	27.15	91.942	157.013	221.089	26.999	19.84	22.193	28.906	26.125	-667.544	1326.47	1064.41
782	1859	1306.22	1219.33	1183.53	1448.12	1881.4	2074.16	1862.79	27.17	92.068	157.05	221.123	27.07	20.015	22.178	29.102	410.875	-575.175	-854.831	-679.264
783	1686	1576.31	1915.13	1415.29	1619.5	1415.04	1367.44	1679.71	26.908	91.801	157.357	220.955	26.94	20.16	22.141	28.866	66.5	161.27	547.689	-264.411
784	1075	607.43	741.176	1967.06	1323.88	1621.74	1461.24	1624.27	26.933	91.996	156.939	220.979	27.253	19.981	21.92	28.804	-248.874	-1014.31	-720.062	342.794
785	2350	2234.94	2139.5	2778.82	2353	1908.63	1971.95	1955.73	26.962	91.773	157.04	221.03	26.959	20.081	21.872	29.299	-2.999	326.305	167.542	823.088
786	550	1478.92	1563.87	2491.76	1930.38	1955.32	1844.96	2044.85	26.986	91.942	156.773	220.865	26.991	19.911	21.721	29.161	-1380.37	-476.405	-281.091	446.912
787	1242	1957.83	1688.23	2620	1925.38	1356.93	1406.93	1566.18	26.929	92.003	157.228	221.027	27.026	19.852	22.328	28.896	-683.374	600.904	281.303	1053.82
788	2096	2147.59	1526.05	758.824	1718.88	1526.73	1652.52	1239.41	27.055	92.031	156.896	220.984	27.02	20.243	22.086	29.216	377.125	620.858	-126.47	-480.587
789	3852	2470.88	1864.71	1970.59	1668.12	1740.71	1732.46	1555.44	26.921	92.109	157.006	220.621	27.046	19.887	21.804	28.999	2183.88	730.171	132.248	415.147
790	619	1371.49	2261.34	2780	1949.75	1941.14	1939.08	1544.12	27.018	91.909	156.916	220.793	26.881	20.119	22.042	28.878	-1330.75	-569.653	322.269	1235.88
791	1925	1069.28	1344.54	2081.18	1707.38	1544.68	1658.19	1397.94	27.18	92.085	157.328	220.887	27.131	20.032	22.013	29.077	217.625	-475.401	-313.654	683.235
792	2916	1001	983.193	1176.47	1809.62	1501.13	1716.18	1038.38	26.872	92.009	156.866	220.822	26.807	19.979	22.037	28.969	1106.38	-500.125	-732.982	138.088
793	2156	1136.55	1921.01	2155.29	1690.88	1759.41	2214.29	1436.47	27.227	91.855	157.135	220.89	26.955	19.786	21.907	29.029	465.125	-622.865	-293.276	718.824
794	1551	1099.4	926.05	1761.18	1353.38	1499.62	1487.08	1696.91	26.971	91.973	156.843	221.073	26.966	20.132	22.2	29.173	197.625	-400.225	-561.028	64.265
795	1021	1454.82	2462.18	794.118	1550.88	1696.54	1655.04	1318.97	26.99	91.857	156.84	221.029	26.89	19.993	22.081	28.738	-529.874	-241.716	807.143	-524.852
796	1943	2963.86	1870.59	1294.12	1416.12	1190.76	1356.2	2214.85	27.094	92.44	157.157	220.975	27.103	19.74	22.309	29.164	526.875	1773.09	514.391	-920.734
797	1357	1641.57	1742.86	1217.65	1363.62	1547.94	1358.09	1646.47	26.918	91.912	157.326	221.078	27.019	20.013	22.109	29.155	-6.624	93.624	384.769	-428.823
798	3107	2885.54	1221.01	1092.94	1350	1590.24	1634.03	1372.5	26.878	92.137	156.821	221.206	27.179	19.975	22.089	28.915	1757	1295.31	-413.024	-279.558
799	880	914.659	2391.6	992.941	1639.12	1549.45	1331.51	2262.21	27.051	92.058	156.927	220.862	26.954	20.19	21.91	28.982	-759.124	-634.788	1060.08	-1269.26
800	2099	2615.46	994.118	2054.12	1789.12	1747.49	1639.39	1973.09	27.017	91.905	157.163	220.823	26.701	20.153	21.995	29.069	309.875	867.972	-645.272	81.029
801	676	1159.64	1026.89	2476.47	1333.88	1809.86	1275.42	1453.53	27.105	91.959	157.155	220.959	26.926	19.957	22.201	28.858	-657.874	-650.225	-248.528	1022.94
802	1019	298.193	773.95	2542.35	1174.38	1804.34	1472.58	2192.65	27.105	92.173	156.95	221.053	27.001	19.972	21.901	28.99	-155.374	-1506.15	-698.633	349.706
803	1539	1813.25	1389.92	1724.71	1679.62	1845.76	1693.8	1539.12	27.231	91.648	156.72	220.747	27.001	19.777	22.089	29.057	-140.624	-32.504	-303.886	185.588
804	1664	1258.03	1907.56	1685.88	1525.5	1422.57	1620.59	1079.71	26.946	91.937	157.039	221.063	26.831	20.119	21.929	28.926	138.5	-164.532	286.975	606.176
805	2044	1158.63	1805.04	1750.59	1510.62	1334.96	1990.44	1551.32	27.363	92.212	157.114	221.078	27.11	20.087	21.988	28.923	533.375	-176.329	-185.398	199.265
806	2457	2843.37	1883.19	1061.18	1275	1182.23	1521.43	1718.53	27.025	92.167	156.869	221.131	26.826	20	22.084	29.05	1182	1661.14	361.765	-657.352
807	1244	1747.99	1309.24	794.118	1378.5	1434.61	1409.14	1478.97	26.734	92.119	156.998	221.088	27.074	19.919	21.963	28.994	-134.499	313.379	-99.894	-684.852
808	1456	1183.73	2305.88	1909.41	1518.75	1653.99	1330.57	1322.06	27.267	91.898	157.143	221.255	27.137	19.947	21.904	28.965	-62.749	-470.255	975.315	587.353
809	2001	1732.93	1001.68	2211.76	1726	1422.69	1253.78	1477.21	26.776	92.063	157.067	220.866	26.943	20.066	22.1	28.851	275	310.241	-252.1	734.559
810	1869	1287.15	3115.97	1312.94	1659.25	1782.51	1648.42	1518.53	26.858	92.127	157.037	221.151	27.001	19.75	21.75	29.236	209.75	-495.355	1467.54	-205.587
811	2227	1033.13	1081.51	1267.06	1686	1524.6	1446.64	1452.94	26.838	91.918	156.922	220.845	26.831	19.922	22.143	29.201	541	-491.465	-365.125	-185.881
812	3028	1651.61	1376.47	2552.94	1904.25	1674.07	1882.56	1262.21	26.786	91.915	157.026	220.865	27.073	19.696	21.88	29.236	1123.75	-22.464	-506.091	1290.73
813	1997	1449.8	1868.07	2178.82	1844.38	1972.39	1707.14	1453.53	27.333	92.093	157.134	220.911	26.74	20.042	21.855	29.283	152.625	-522.589	160.924	725.294
814	1009	1791.16	1319.33	3664.71	1901.62	1503.14	1667.75	1634.12	27.053	91.975	156.901	220.987	26.876	19.625	21.87	29.134	-892.624	288.027	-348.423	2030.59
815	603	1357.43	984.874	652.941	1635.25	1449.3	1718.49	1212.06	26.888	91.803	157.148	220.96	27.104	20.072	22.013	29.176	-1032.25	-91.866	-733.612	-559.117
816	948	1071.29	1806.72	1628.23	2238.88	1187.88	1505.57	1575.73	27.08	92.002	157.036	221.032	27.096	19.995	22.29	28.861	-1290.87	-116.59	301.155	52.5
817	2694	1758.03	2116.81	1816.47	1864.62	1636.42	1509.98	1328.97	27.075	92.019	156.95	220.869	27.261	20.125	22.007	28.947	829.375	121.611	606.828	487.5
818	1461	3598.39	1984.03	1541.18	1314.75	1654.24	1857.25	1564.85	27.115	91.88	157.142	221.082	27.049	20.204	21.818	29.173	146.25	1944.15	126.786	-23.675
819	1529	2091.36	984.874	3321.18	1101	1499.62	2033.09	1528.38	26.817	91.598	156.874	221.008	26.895	20.085	22.021	29.143	428	591.742	-1048.21	1792.79
820	2114	1052.21	2157.98	175.294	1687	1528.99	1496.22	2145.74	27	91.971	156.973	220.98	26.963	19.891	22.24	28.839	427	-476.781	661.765	-1970.44
821	1632	1071.29	856.303	1395.29	1851.12	1660.77	1570.48	1668.09	26.98	91.946	156.977	220.711	27.092	19.831	21.973	29.172	-219.124	-589.482	-714.18	-272.793
822	996	1012.05	2967.23	2291.76	1595	1117.85	1599.06	1776.91	26.951	92.154	157.022	221.142	26.864	19.986	21.98	29.026	-598.999	-105.797	1368.17	514.853
823	611	2066.26	1572.27	1555.29	1064.12	1693.02	1709.66	1546.03	27.031	91.884	156.849	221.086	26.887	19.732	22.156	29.017	-453.124	373.243	-137.394	9.265
824	2151	1685.74	1103.36	1448.23	1500.5	1556.73	1497.69	1453.97	27.036	92.158	157.04	221.097	27.212	19.8	21.726	28.968	650.5	129.016	-394.327	-5.734
825	1541	2783.13	1605.04	2458.82	1897.5	1668.42	1516.39	1763.68	26.942	91.936	157.07	220.693	27.085	19.873	21.838	29.128	-356.499	1114.71	88.655	695.147
826	1977	2117.47	1261.35	3309.41	1770.12	1710.09	1284.14	2049.41	27.133	91.82	156.975	221.176	26.889	19.938	22.04	29.386	206.875	407.38	-22.793	1260
827	976	1364.46	1339.5	780	1959.12	1692.02	1556.09	1473.97	26.922	91.783	156.928	221.013	27.086	19.895	21.946	29.032	-983.124	-327.559	-216.596	-693.97
828	1844	1305.22	346.218	3142.35	1082.38	1584.21	1606.83	1756.18	27.025	91.973	156.903	221.117	26.913	20.247	22.102	29.292	761.625	-278.99	-1260.61	1386.18
829	2398	1529.12	1922.69	1397.65	874.125	1369.6	1940.44	1587.5	26.966	92.194	157.033	221.23	27.184	20.102	22.099	29.202	1523.88	159.513	-17.751	-189.852
830	2055	2590.36	2395.8	2831.76	1619.5	1396.08	1568.7	1418.53	26.943	92.075	157.005	220.969	27.183	20.111	22.171	29.219	435.5	1194.28	827.101	1413.23
831	923	2306.22	714.286	2834.12	1519.88	1980.8	1477.73	1500.59	27.089	91.954	157.232	220.939	27.114	19.782	21.87	29.099	-596.874	325.427	-763.444	1333.53
832	1802	2128.51	1146.22	1276.47	1669.75	1872.24	1390.55	1548.09	26.772	91.991	157.119	220.971	27.251	20.173	21.855	29.08	132.25	256.275	-244.327	-271.617
833	2588	1127.51	2168.91	1322.35	1646.88	1876	1482.46	1712.35	26.995	92	157.13	221.018	27.006	20.013	22.036	29.026	941.125	-748.493	686.45	-389.999
834	1469	3033.13	1197.48	1517.65	1364.88	1547.31	1807.14	1703.97	27.025	91.755	156.963	220.864	26.897	19.933	21.932	29.15	104.125	1485.82	-609.663	-186.323
835	869	2494.98	1294.96	1347.06	1490	1576.05	1681.3	1423.53	27.088	92.168	157.016	221.188	27.209	20.136	22.049	28.789	-620.999	918.926	-386.344	-76.47
836	1072	552.209	968.067	1261.18	1847.75	1856.68	1613.03	1658.97	27.044	91.968	157.122	221.078	26.937	20.081	21.921	29.183	-775.749	-1304.47	-644.957	-397.793
837	494	925.703	2299.16	1937.65	1373.38	1875.75	1478.36	1654.12	27.044	91.973	156.815	221.077	27.016	20.003	21.963	29.154	-879.374	-950.049	820.798	283.529
838	2459	1112.45	1877.31	1974.12	1730.38	1790.04	1362.18	1980.73	27.147	91.865	157.237	220.94	26.972	20.184	22.193	29.22	728.625	-677.584	515.126	-6.617
839	1776	1733.94	1399.16	2025.88	1639.62	1105.8	1522.16	1875.59	26.739	92.032	157.166	221.086	27.117	20.17	22.029	28.848	136.375	628.138	-123.003	150.294
840	1769	1104.42	1390.76	790.588	1177.88	1589.61	1448.63	1462.06	27.148	92.104	157.266	221.132	26.939	20.086	22.119	29.035	591.125	-485.19	-57.877	-671.47
841	2701	1284.14	2238.66	1669.41	1292.88	1806.73	1262.5	1788.38	27.145	91.827	156.968	221.247	26.745	19.888	22.299	29.225	1408.12	-522.589	976.155	-118.97
842	1720	880.522	1149.58	1480	1384.25	1373.74	1706.51	1430.29	26.97	92.042	156.83	220.89	27.125	20.222	21.985	29.035	335.75	-493.222	-556.932	49.706
843	1071	818.273	1291.6	1535.29	1455.12	1473.39	1925.84	1718.38	26.903	92.149	157.107	220.851	27.079	20.01	22.045	29.171	-384.124	-655.119	-634.243	-183.087
844	1094	1796.18	1414.29	2789.41	1588.25	1450.43	1568.38	1671.32	26.882	92.017	156.833	221.21	27.119	19.97	22.249	29.268	-494.249	345.758	-154.096	1118.09
845	2253	1897.59	1105.88	2197.65	1865.12	2347.51	1729.94	1523.23	27.057	91.856	156.974	221.131	27.104	20.184	22.129	29.131	387.875	-449.924	-624.054	674.412
846	2810	966.867	1353.78	1744.71	1654.38	1334.34	1469.75	1736.91	27.066	91.827	157.125	220.851	27.018	19.972	21.79	28.717	1155.62	-367.469	-115.965	7.794
847	1898	1849.4	2348.74	1107.06	1569.25	1942.27	1813.13	1561.91	26.927	92.238	157.095	220.938	26.924	19.95	22.075	29.009	328.75	-92.87	535.609	-454.852
848	1314	1247.99	1853.78	1951.77	1447.88	1831.95	1728.05	1772.06	26.836	92.008	156.676	220.913	26.852	19.927	22.041	29.193	-133.874	-583.96	125.735	179.706
849	1890	1476.91	1505.04	2954.12	1320.38	1838.23	1727.52	1428.97	26.742	92.026	157.115	220.887	27.198	19.96	21.945	28.94	569.625	-361.319	-222.478	1525.15
850	1818	2372.49	636.134	2192.94	1710.12	1637.3	1669.85	1456.18	27.085	92.257	156.837	221.114	27.032	19.691	22.038	28.971	107.875	735.191	-1033.72	736.765
851	2286	2440.76	1627.73	1488.23	1464.88	1547.94	2106.62	1441.18	27.147	92.043	156.705	221.016	26.899	20.158	21.932	28.894	821.125	892.821	-478.886	47.059
852	2891	1411.65	1367.23	1168.23	1605.25	1651.86	1877.21	1646.91	26.774	91.916	157.115	220.91	26.845	19.975	22.064	29.093	1285.75	-240.21	-509.978	-478.675
853	394	1158.63	2106.72	521.176	2339.75	1771.84	1670.48	1436.47	27.014	92.152	156.756	221.021	27.102	20.041	21.875	28.904	-1945.75	-613.202	436.239	-915.293
854	1670	2791.16	1812.61	1178.82	1634.62	1787.4	1619.01	1336.32	26.767	91.969	156.991	221.011	26.85	20.072	22.005	29.049	35.375	1003.76	193.592	-157.499
855	1156	1127.51	800.84	647.059	1564.88	1563.63	1545.38	1632.35	26.982	91.931	157.036	220.861	26.823	19.952	21.909	29.164	-408.874	-436.118	-744.537	-985.293
856	962	1995.98	1510.92	2397.65	1754.25	1639.06	1167.86	1815.44	26.98	92.197	157.211	221.078	26.957	20.04	22.2	28.688	-792.249	356.928	343.067	582.206
857	2769	1745.98	2163.87	2197.65	1957.62	1251.63	1288.55	1465.59	27.024	92.199	156.847	220.651	27.211	20.205	22.053	29.084	811.375	494.352	875.315	732.059
858	3645	2077.31	1837.82	661.176	1565.62	1853.79	1519.43	1460	26.776	91.963	156.944	220.988	27.25	19.737	21.772	28.925	2079.38	223.519	318.382	-798.823
859	3130	909.639	849.58	421.176	1577.25	1724.02	1596.01	1419.12	26.866	91.782	156.907	221.044	26.813	20.046	22.063	29.063	1552.75	-814.382	-746.428	-997.94
860	1396	1990.96	1584.87	1641.18	1504.88	1847.52	1907.77	1357.65	27.126	91.911	157.303	220.892	26.985	19.793	21.845	28.848	-108.874	143.449	-322.898	283.529
861	1149	2371.49	1549.58	1094.12	1491.38	1528.87	1329.62	1739.41	26.903	91.791	157.044	221.157	26.973	19.985	22.366	28.832	-342.374	842.62	219.958	-645.293
862	1235	1605.42	1468.07	2850.59	1915.25	1710.97	2212.29	1643.82	27.242	91.92	157.008	221.02	27.025	20.324	22.066	28.766	-680.249	-105.546	-744.222	1206.77
863	1394	1252.01	1505.88	1752.94	1758.25	1242.97	1466.18	1760.88	27.27	91.981	157.254	220.757	27.248	19.958	21.801	29.01	-364.249	9.036	39.706	-7.94
864	1609	1388.55	1415.13	1488.23	1747	2225.53	1525.94	1931.18	26.967	91.953	156.878	220.963	26.901	20.134	21.792	28.936	-137.999	-836.972	-110.818	-442.94
865	1555	1066.27	1817.65	1391.77	1631.62	2016.44	1457.67	1682.06	26.919	91.856	157.086	221.199	26.822	20.047	22.043	29.008	-76.624	-950.175	359.979	-290.293
866	1146	1065.26	1110.92	3175.29	1662.62	1756.9	1347.9	1775	26.877	91.765	157.203	221.34	26.953	19.994	22.015	29.123	-516.624	-691.641	-236.974	1400.29
867	1963	2216.87	1982.35	721.176	1422.25	1580.45	1315.55	2062.94	26.858	91.941	156.901	220.954	27.042	19.814	22.117	29.033	540.75	636.421	666.807	-1341.76
868	2369	1140.56	1442.86	2261.18	1563.38	1421.44	1772.27	1939.85	27.112	91.903	156.671	220.911	26.938	19.997	21.675	29.203	805.625	-280.872	-329.411	321.324
869	1553	2236.95	1152.94	2315.29	1516.5	1778.24	1209.45	1566.77	27.332	91.945	156.912	221.017	26.693	20.202	21.902	28.827	36.5	458.71	-56.512	748.529
870	1087	2831.32	747.059	1352.94	1701.12	1770.83	1597.58	2211.76	27.216	91.803	157.114	220.851	27.149	20.131	21.948	29.245	-614.124	1060.49	-850.524	-858.823
871	1691	932.731	1414.29	3988.24	1465.88	1709.59	1396.53	1237.65	27.079	91.969	156.624	220.957	26.806	20.052	21.78	28.789	225.125	-776.856	17.752	2750.59
872	1123	1115.46	1591.6	3005.88	1424	1730.3	1584.87	1413.97	26.97	91.888	156.967	221.257	26.82	19.841	22.022	28.822	-300.999	-614.833	6.723	1591.91
873	597	959.839	1173.95	169.412	1713.12	1626.76	1558.4	1883.38	26.997	92.207	156.941	221.002	26.989	19.794	22.175	29.005	-1116.12	-666.917	-384.453	-1713.97
874	483	2500	1052.1	420	1427.12	1465.36	1248	1590	26.916	91.888	156.705	221.137	26.855	20.315	22.204	29.001	-944.124	1034.64	-195.902	-1170
875	1330	1579.32	2297.48	1040	1700.38	1581.95	1717.65	1544.27	26.754	92.061	157.012	221.132	26.754	20.04	21.737	29.099	-370.374	-2.635	579.832	-504.264
876	1535	1910.64	1867.23	1794.12	1489.88	1820.16	1706.72	1318.97	26.958	92.045	157.117	220.884	27.174	19.745	22.063	28.997	45.125	90.487	160.504	475.147
877	1282	1361.45	2798.32	1165.88	1423.12	1477.16	1762.29	1503.97	27.28	92.044	157.129	221.069	27.088	19.823	22.043	28.903	-141.124	-115.712	1036.03	-338.087
878	1595	1732.93	1931.93	1210.59	1594.38	1592.49	1415.34	1314.56	26.752	91.82	157.181	220.896	27.033	19.818	21.931	29.062	0.625	140.437	516.597	-103.97
879	3059	1454.82	2374.79	1364.71	1537.5	1037.53	1512.39	1669.71	27.026	92.068	157.017	221.168	26.96	19.913	21.87	28.891	1521.5	417.294	862.395	-304.999
880	1133	2964.86	1473.11	1483.53	1416.62	1640.31	1548.11	1402.06	26.919	91.832	156.928	220.738	27.272	19.822	21.973	29.247	-283.624	1324.55	-74.999	81.471
881	2338	2190.76	1061.35	1862.35	1755.38	1617.47	1670.27	1924.27	27.037	91.925	156.887	220.956	26.934	19.962	22.284	29.012	582.625	573.293	-608.928	-61.911
882	2142	1356.43	1694.12	1256.47	2028	1666.29	1415.55	1744.27	27.145	92.044	156.953	220.991	27.411	19.858	21.839	29.014	114	-309.863	278.571	-487.793
883	647	1708.84	1395.8	616.471	1620.5	1792.42	1461.77	1973.53	27.081	92.135	157.045	221.067	26.98	20.328	21.716	28.964	-973.499	-83.583	-65.965	-1357.06
884	1145	1200.8	1535.29	2691.76	1160	1482.43	2030.25	1945	26.946	92.208	157.072	220.972	27.144	19.849	21.936	28.997	-14.999	-281.626	-494.957	746.765
885	1655	1957.83	1939.5	1692.94	1289	2086.85	1688.23	1543.23	26.955	91.764	156.761	221.079	27.164	20.044	22.152	29.059	366	-129.015	251.261	149.706
886	1065	2353.41	870.588	2250.59	1595.12	1420.81	1874.06	1542.06	27.149	91.913	157.265	220.997	26.694	19.942	21.842	29.147	-530.124	932.605	-1003.47	708.529
887	441	1135.54	2489.92	1401.18	1517.25	1861.19	1344.96	1701.03	26.899	92.087	156.676	220.665	26.979	19.958	22.387	29.011	-1076.25	-725.652	1144.96	-299.852
888	2125	1066.27	542.017	1282.35	1947.5	1522.59	1713.03	1613.23	26.827	92.049	157.055	221.001	26.948	19.938	22.215	29.171	177.5	-456.324	-1171.01	-330.881
889	857	985.944	802.521	1549.41	1693.75	1722.14	1584.56	1661.47	27.161	92.142	156.894	220.957	26.949	19.905	21.843	28.887	-836.749	-736.194	-782.037	-112.058
890	1502	2276.1	1465.55	1340	1308	1343.37	1655.04	1870.88	26.895	91.835	156.782	220.952	27.128	20.107	22.2	28.824	194	932.731	-189.495	-530.881
891	4669	1413.65	1015.13	2652.94	1723	1653.24	1959.98	1443.97	27.02	92.203	157.226	220.957	27.108	19.966	22.018	28.799	2946	-239.582	-944.852	1208.97
892	1245	843.373	1100	1704.71	1563.62	1798.57	1724.27	2103.97	27.058	91.968	157.11	221.228	26.877	19.849	22.099	29.026	-318.624	-955.195	-624.264	-399.264
893	1008	685.743	1041.18	1609.41	1810.12	1729.54	1451.89	1528.23	27.136	92.101	156.77	221.024	27.138	20.106	21.918	28.606	-802.124	-1043.8	-410.713	81.176
894	1287	1843.37	1744.54	1805.88	1545.12	1546.56	1534.87	1786.03	26.996	92.166	157.272	221.127	26.824	20.064	22.274	28.878	-258.124	296.812	209.664	19.853
895	1337	1188.76	1613.44	1028.23	1314.38	1309.24	1129.52	1825.88	27.104	92.162	157.045	220.898	26.914	19.839	21.895	28.872	22.625	-120.481	483.929	-797.646
896	767	1882.53	2696.64	767.059	1725.88	2130.77	1636.35	1942.06	27.186	92.047	157.323	220.833	27.02	19.981	22.18	28.954	-958.874	-248.242	1060.29	-1175
897	1937	1530.12	766.387	812.941	1359.38	1943.4	1265.65	1771.18	26.729	92.157	157.011	220.823	26.912	20.045	22.271	28.793	577.625	-413.277	-499.264	-958.234
898	855	1618.47	743.697	2483.53	1831.88	1466.62	1393.28	1490.44	26.969	92.274	157.029	221.09	27.093	20.187	21.93	29.166	-976.874	151.857	-649.579	993.088
899	1631	2103.41	1700	2196.47	1597.38	1438.88	1258.82	2271.03	26.905	92.019	157.054	221.169	26.796	19.791	21.887	29.266	33.625	664.533	441.176	-74.558
900	1085	708.835	1079.83	2488.24	1517.5	1577.56	1590.86	1306.77	26.898	91.99	156.93	221.161	26.875	19.834	22.209	29.325	-432.499	-868.724	-511.028	1181.47
901	2315	1602.41	966.387	2382.35	1160.88	1724.02	1529.73	1744.56	27.189	91.773	157.066	220.643	27.104	20.145	21.981	28.986	1154.12	-121.61	-563.339	637.794
902	3379	1626.51	1161.35	1968.23	1695.75	1659.14	1474.47	1845.29	26.977	91.775	156.86	220.938	27.026	19.986	22.038	28.878	1683.25	-32.63	-313.129	122.941
903	158	3619.48	3589.08	1764.71	1657.5	1673.57	1376.79	1628.82	27.01	91.688	157.355	220.902	26.964	19.628	22.605	28.946	-1499.5	1945.91	2212.29	135.882
904	2735	517.068	2848.74	1595.29	1855.88	1833.33	1964.6	1810.73	27.11	91.875	156.913	220.961	27.257	19.953	21.989	29.095	879.125	-1316.26	884.139	-215.44
905	2661	2102.41	1072.27	1407.06	1865.62	1776.1	1336.87	1550.59	27.02	91.86	156.941	220.682	26.794	19.942	22.104	29.071	795.375	326.305	-264.6	-143.528
906	2206	2082.33	1036.13	711.765	1754.25	1501.63	1613.03	1600.29	27.106	92.04	156.974	221.08	26.969	19.843	21.836	28.909	451.75	580.698	-576.89	-888.528
907	1046	3478.92	1040.34	874.118	1899.88	2032.38	1738.13	1616.91	26.754	91.989	157.13	220.875	26.982	20.029	21.835	28.812	-853.874	1446.54	-697.793	-742.793
908	2144	1551.2	1971.43	2203.53	1471.5	1471.51	1546.11	1792.21	26.891	92.08	156.932	220.832	27.02	19.934	22.25	28.706	672.5	79.694	425.315	411.324
909	1560	956.827	294.958	1788.23	1174.75	1520.58	1111.87	1448.09	27.011	92.03	156.968	220.801	26.963	20.088	21.962	28.947	385.25	-563.754	-816.911	340.147
910	2261	613.454	2681.51	1523.53	1757.75	1256.78	1390.65	1940.73	26.898	92.194	157.031	220.918	26.643	20.13	21.953	28.757	503.25	-643.322	1290.86	-417.205
911	2340	953.815	1490.76	2414.12	1941.75	1859.94	1468.91	1728.97	27.069	91.975	156.97	221.166	26.879	20.123	21.962	29.078	398.25	-906.123	21.849	685.147
912	1937	2612.45	552.941	854.118	1581.88	1616.97	2135.92	1208.23	26.909	91.824	156.965	220.895	27.085	19.981	21.765	29.017	355.125	995.482	-1582.98	-354.117
913	2357	2241.97	3382.35	2888.24	2190.38	1375.88	1473.11	1783.53	27.049	92.152	157.003	220.89	26.785	19.744	22.18	28.792	166.625	866.089	1909.24	1104.71
914	1844	737.952	999.16	1084.71	1737.5	1854.79	1726.58	1600.59	27.024	91.903	156.909	220.826	27.07	19.695	22.014	29.087	106.5	-1116.84	-727.415	-515.881
915	1088	1291.16	1203.36	1675.29	1626.25	2104.17	1612.61	1916.62	27.118	91.76	157.007	220.889	27.318	20.051	21.934	28.867	-538.249	-813.001	-409.243	-241.323
916	1340	2570.28	598.319	1570.59	1754.88	1657.63	1912.39	1330	27.188	92.174	157.167	220.892	27.062	20.046	22.211	29.009	-414.874	912.651	-1314.08	240.588
917	935	2056.22	1865.55	1794.12	1746.12	1399.72	1756.93	1225	27.038	92.038	157.171	221.171	26.948	20.006	22.027	29.148	-811.124	656.501	108.613	569.118
918	1901	2367.47	787.395	2660	1599.88	1598.64	1440.86	1759.71	27.19	92.027	157.175	220.707	26.828	20.099	21.953	29.185	301.125	768.825	-653.465	900.294
919	1332	1054.22	1719.33	2136.47	1717.62	1793.8	1478.89	1464.85	27.031	91.834	157.163	221.08	26.92	20.102	21.924	28.985	-385.624	-739.582	240.441	671.618
920	1660	1573.29	1251.26	1172.94	1802.62	2039.53	1304.94	1830.29	26.944	91.929	156.838	221.086	27.106	20.414	21.893	28.75	-142.624	-466.239	-53.675	-657.352
921	937	725.904	1103.36	2200	1684.12	1798.07	1494.75	1161.18	26.985	92.195	157.081	221.224	27.083	19.888	22.158	29.145	-747.124	-1072.16	-391.386	1038.82
922	1372	1185.74	1089.08	1872.94	1916.88	2121.61	1563.34	1611.91	26.966	92.159	156.981	220.833	26.91	19.934	21.992	29.139	-544.874	-935.867	-474.264	261.029
923	1791	922.691	762.185	1207.06	1425.88	2011.17	1959.03	1514.41	27.121	92.05	157.052	220.851	26.79	19.983	21.873	28.991	365.125	-1088.48	-1196.85	-307.352
924	2904	1158.63	1231.93	1125.88	1538.38	1852.91	1882.04	1684.41	27.208	91.828	156.974	220.954	26.895	20.116	22.056	29.116	1365.62	-694.276	-650.104	-558.528
925	1334	2296.18	1321.85	2000	1676.12	1180.22	1758.4	2018.23	26.994	91.899	157.094	220.845	27.043	19.99	21.879	29.11	-342.124	1115.96	-436.554	-18.234
926	1530	883.534	988.235	2602.35	1403.38	1815.14	1709.87	1643.68	27.259	91.818	157.025	220.963	26.879	19.954	22.271	28.714	126.625	-931.6	-721.638	958.676
927	1772	2510.04	979.832	762.353	1575.88	1894.33	1821.64	1347.94	26.972	92.11	157.186	221.14	27.086	19.788	21.905	29.131	196.125	615.713	-841.806	-585.587
928	1089	1987.95	1693.28	534.118	1219.62	2309.11	1486.56	1530.44	27.09	91.939	157.138	220.952	26.768	20.024	21.994	28.849	-130.624	-321.159	206.723	-996.323
929	1102	670.683	2661.34	1945.88	1377.12	1159.14	1344.64	2103.53	27.126	91.995	156.994	221.036	27.123	19.759	22.038	28.902	-275.124	-488.453	1316.7	-157.646
930	1744	1475.9	2184.87	2744.71	1494.62	1445.41	1086.35	1278.68	26.714	92.314	156.67	221.01	26.817	20.135	22.052	28.908	249.375	30.497	1098.53	1466.03
931	1762	1789.16	739.496	2378.82	1284.62	1653.49	1523	1789.27	26.955	91.779	156.869	221.028	27.195	20.277	21.977	29.121	477.375	135.668	-783.507	589.559
932	1556	3522.09	1492.44	1780	1528.38	1614.58	1697.69	1256.91	26.902	91.951	157.078	220.82	27.121	19.995	22.136	28.744	27.625	1907.51	-205.251	523.088
933	1282	1294.18	1200	2282.35	1604.25	1417.8	1524.27	1514.71	27.113	91.859	157.014	220.932	26.959	20.012	21.958	29.148	-322.249	-123.618	-324.264	767.647
934	1766	1212.85	1293.28	3528.24	1655.88	1705.45	1255.46	1372.21	26.956	91.98	156.915	221.068	26.697	19.939	21.981	29.03	110.125	-492.594	37.815	2156.03
935	1640	583.333	1268.91	727.059	1608.5	1518.7	1506.51	1645.29	26.994	91.996	156.975	221.117	27.055	19.833	22.174	29.078	31.5	-935.365	-237.604	-918.234
936	2171	1837.35	2683.19	1469.41	1810.88	1915.54	1414.71	1460.44	26.78	92.11	156.877	220.831	27.078	20.054	21.937	28.799	360.125	-78.187	1268.49	8.971
937	3205	806.225	1725.21	2965.88	2135	1774.22	1355.88	1696.18	27.197	92.199	156.895	221.19	26.851	20.142	22.084	28.934	1070	-967.996	369.328	1269.71
938	1084	662.651	1381.51	1238.82	1623.62	1792.67	1501.26	1487.5	27.014	92.027	157.078	220.951	27.172	19.978	22.088	29.235	-539.624	-1130.02	-119.747	-248.675
939	1601	1210.84	1573.11	1554.12	1575.62	2225.9	1424.47	1403.68	26.855	91.931	157.053	221.09	27.012	20.08	21.995	29.102	25.375	-1015.06	148.634	150.441
940	1063	833.333	1100	2207.06	1691.62	1377.26	1730.36	2081.62	26.844	91.859	156.919	220.674	27.086	20.184	22.025	29.01	-628.624	-543.925	-630.356	125.441
941	1109	1925.7	2381.51	2478.82	1397.25	1668.8	1647.37	1394.41	26.953	92.17	157.027	220.998	27.009	19.805	22.128	29.033	-288.249	256.903	734.139	1084.41
942	974	2722.89	645.378	1892.94	1371.38	2105.67	1566.07	1727.94	27.044	92.149	157.05	221.153	26.989	20.153	22.068	28.959	-397.374	617.219	-920.692	165
943	1392	2024.1	752.941	1101.18	1475.12	1889.93	1751.05	1355.88	26.896	91.889	157.103	221.109	27.098	19.956	22.021	29.043	-83.124	134.162	-998.108	-254.705
944	1655	2055.22	1779.83	531.765	1482.38	1791.16	1643.38	2190.44	27.061	92.222	157.151	220.937	26.688	20.116	22.149	29.015	172.625	264.056	136.45	-1658.67
945	2418	1030.12	2207.56	1122.35	1985.25	1477.03	2059.56	1595.29	26.834	92.246	157.194	220.958	27.054	20.142	22.13	28.865	432.75	-446.912	148.004	-472.94
946	1293	1109.44	643.697	1705.88	1436	2157.63	1883.82	1313.23	26.927	92.01	157.04	220.697	27.139	20.142	21.763	29.113	-142.999	-1048.19	-1240.12	392.647
947	1534	1292.17	2804.2	2000	1582.5	1286.9	1555.57	1735.44	27.081	91.788	157.055	220.979	26.751	19.873	21.597	29.156	-48.499	5.271	1248.63	264.559
948	2836	1410.64	1012.61	1835.29	1626.12	1926.71	1362.18	1304.71	27.339	91.99	157.203	220.985	26.873	20.074	22.235	29.037	1209.88	-516.063	-349.579	530.588
949	1626	1914.66	1709.24	777.647	1335.25	1329.32	1577.84	1891.47	27.14	91.761	157.223	221.047	26.953	19.829	21.783	28.89	290.75	585.341	131.408	-1113.82
950	1700	2712.85	1008.4	1007.06	1232.25	1563.25	1397.06	1761.47	27.017	91.774	156.975	221.019	26.909	20.132	22.091	28.852	467.75	1149.6	-388.654	-754.411
951	991	1259.04	657.983	510.588	2073.38	1694.03	1590.34	1649.56	26.972	92.133	157.129	221.076	26.9	19.997	21.862	29.116	-1082.37	-434.989	-932.352	-1138.97
952	1212	2320.28	902.521	1205.88	1673.75	2187.12	1352.1	1448.68	26.942	91.851	157.037	221.068	26.896	20.243	21.967	29.009	-461.749	133.158	-449.579	-242.793
953	964	906.627	2335.29	3524.71	1917.88	1647.21	1817.12	1803.53	26.974	92.043	156.798	221.025	26.791	20.063	22.093	28.978	-953.874	-740.586	518.172	1721.18
954	2009	2413.66	1439.5	2148.24	1763.5	1410.52	1850.42	1957.21	26.858	91.996	156.951	221.041	27.014	20.017	22.024	29.051	245.5	1003.14	-410.923	191.029
955	1368	2580.32	1283.19	2164.71	1654.88	1562.37	1904.41	1704.41	26.847	91.877	157.03	221.195	26.777	19.988	21.966	28.75	-286.874	1017.95	-621.217	460.294
956	2763	1688.76	1563.03	2130.59	1420.38	1679.47	1514.39	1478.23	27.026	91.726	156.904	220.878	27.143	19.975	22.225	29.021	1342.62	9.287	48.634	652.353
957	892	1173.69	1826.05	312.941	1471.62	1177.46	1461.87	1635.88	26.931	92.123	157.025	221.035	27.191	20.154	22.417	28.995	-579.624	-3.764	364.181	-1322.94
958	1709	1813.25	1165.55	1474.12	1703.62	1562.12	1625.21	1525.15	27.193	91.973	156.95	221.119	26.663	20.095	21.899	28.944	5.375	251.13	-459.663	-51.028
959	2743	2315.26	766.387	1264.71	1872.25	1996.36	1847.79	1844.56	26.999	92.317	156.965	220.866	26.991	20.029	22.148	29.026	870.75	318.901	-1081.41	-579.852
960	2505	1774.1	1210.08	967.059	1255.75	1779.49	1085.5	1363.53	27.135	92.371	157.037	221.25	27.012	20.038	21.709	28.984	1249.25	-5.396	124.58	-396.47
961	1387	2589.36	1581.51	625.882	1675	1510.79	1208.72	1768.53	27.22	92.39	157.296	221.173	27.347	20.154	21.935	28.961	-287.999	1078.56	372.794	-1142.65
962	945	2307.23	960.504	3222.35	1673.25	2286.52	1615.97	1774.56	26.883	92.144	157.176	221.214	26.793	19.875	21.853	29.551	-728.249	20.708	-655.461	1447.79
963	583	984.94	1295.8	2403.53	1497.75	1857.3	1511.03	1375.73	26.781	91.91	157.075	221.022	27.024	20.092	21.974	28.767	-914.749	-872.363	-215.23	1027.79
964	2109	631.526	815.966	1121.18	1829.75	1583.33	1292.54	1936.18	27.272	92.082	156.992	220.79	26.763	20.267	22.034	29.048	279.25	-951.806	-476.575	-814.999
965	1633	1508.03	2283.19	1061.18	1791.75	1584.46	1901.68	1555.73	26.834	91.993	157.101	221.248	27.144	20.06	21.995	29.037	-158.749	-76.43	381.513	-494.558
966	1876	2439.76	1495.8	2954.12	1445.75	1671.06	1733.72	1464.85	27.163	92.082	156.975	221.133	26.983	19.677	21.838	29.034	430.25	768.7	-237.919	1489.27
967	548	3014.06	1167.23	771.765	1245.5	1427.21	1571.43	2378.24	26.75	92.054	156.801	221	27.118	20.171	22.018	28.985	-697.499	1586.85	-404.201	-1606.47
968	3725	1385.54	1503.36	3312.94	1593.75	1868.1	1355.67	1975.15	27.066	91.728	156.836	220.493	26.944	20.063	21.922	28.862	2131.25	-482.554	147.689	1337.79
969	987	1720.88	1969.75	1142.35	1533.25	1451.43	1485.61	1602.79	27.003	92.241	157.083	221.02	27.026	20.086	21.973	29.166	-546.249	269.453	484.139	-460.44
970	1713	1187.75	1424.37	987.059	1601.75	1520.46	1458.61	1815.29	27.001	92.002	156.936	221.226	26.978	19.835	21.8	29.317	111.25	-332.705	-34.243	-828.234
971	1796	1574.3	2259.66	1014.12	1935.75	1425.45	1680.99	1836.18	26.767	92.029	156.876	221.021	27.146	20.069	22.04	28.933	-139.749	148.845	578.676	-822.058
972	285	855.422	1295.8	1569.41	1674	1584.21	1415.65	1285.59	26.952	92.106	157.082	220.91	26.979	20.254	21.867	29.133	-1389	-728.789	-119.852	283.824
973	3247	1899.6	3094.96	1255.29	1159.62	1211.09	1461.24	2079.85	27.048	91.992	157.287	220.874	26.932	19.932	21.795	28.937	2087.38	688.504	1633.72	-824.558
974	1147	822.289	1931.09	2182.35	1182.75	1884.16	2193.8	1771.62	27.074	92.166	156.855	221.022	27.051	19.771	22.178	28.804	-35.749	-1061.87	-262.709	410.735
975	1302	759.036	1936.13	1787.06	1574	1846.76	1518.7	1985	27.079	91.986	156.694	220.831	26.88	19.983	22.054	29.056	-271.999	-1087.72	417.437	-197.94
976	2007	966.867	2312.61	692.941	1659.62	1305.97	1582.35	1819.85	27.25	92.228	156.902	220.939	27.074	19.831	21.937	28.979	347.375	-339.105	730.252	-1126.91
977	1965	1231.93	2421.85	2403.53	1164.38	1675.58	2053.15	2107.5	26.933	92.234	157.288	220.885	26.937	20.123	22.425	28.936	800.625	-443.649	368.697	296.029
978	891	1267.07	1514.29	523.529	1266.5	1688.13	1697.37	1457.94	27.23	91.843	157.04	220.992	26.757	19.779	21.813	29.012	-375.499	-421.058	-183.087	-934.411
979	2442	1507.03	1966.39	2152.94	1671.25	1849.02	1793.91	1690.88	27.265	92.147	157.319	221.232	26.967	19.906	21.576	29.01	770.75	-341.992	172.479	462.059
980	482	1513.05	2006.72	837.647	1536.88	1789.78	1232.88	1634.85	26.873	91.816	156.938	220.848	26.916	19.864	21.88	28.958	-1054.87	-276.731	773.845	-797.205
981	892	2030.12	1184.03	891.765	1604.12	1809.86	1723.53	1805.88	27.195	91.826	157.045	221.026	26.887	20.028	21.994	28.897	-712.124	220.256	-539.495	-914.117
982	1881	2243.98	1944.54	2631.76	1715.5	1773.22	1182.77	1923.23	26.899	91.971	156.9	220.839	26.995	19.852	22.12	29.218	165.5	470.758	761.765	708.529
983	2119	1538.15	742.017	941.176	1524	1639.06	1478.36	1649.12	26.983	91.838	157.038	220.95	27.16	19.838	21.836	29.133	595	-100.903	-736.344	-707.94
984	2610	414.659	1965.55	1082.35	1407.25	2151.73	1582.67	1975.15	26.974	91.888	157.12	221.016	26.722	19.998	21.866	28.739	1202.75	-1737.07	382.878	-892.793
985	871	1812.25	3042.02	1718.82	1404.5	1823.54	1584.66	1505	26.845	91.974	156.84	220.938	27.016	20.144	21.994	29.126	-533.499	-11.294	1457.35	213.824
986	1742	1565.26	752.941	1352.94	1245.25	2225.78	1312.29	1766.62	27.172	92.216	157.176	220.669	27.217	20.044	21.929	29.101	496.75	-660.516	-559.348	-413.675
987	1543	707.831	1047.06	1931.77	1572.75	1832.45	1605.15	1635.59	26.875	91.942	156.904	220.926	26.832	19.828	22.079	29.166	-29.749	-1124.62	-558.087	296.176
988	1265	1272.09	1275.63	517.647	1137.38	1662.15	1698.32	1684.12	26.942	91.955	156.901	220.896	27.049	19.782	21.873	28.878	127.625	-390.059	-422.688	-1166.47
989	1264	1588.35	2608.4	2336.47	1793.75	1839.86	1533.4	1169.85	27.081	91.865	157.342	220.855	27.326	19.889	21.989	29.057	-529.749	-251.505	1075	1166.62
990	741	904.618	1894.96	2137.65	1403	1816.39	1335.29	1205.73	26.883	91.897	157.112	221.059	26.885	19.94	22.1	28.863	-661.999	-911.771	559.664	931.912
991	1111	2435.74	2871.43	1162.35	2314.88	1629.02	1608.19	1738.68	26.935	92.135	157.04	220.849	26.824	19.814	21.899	28.858	-1203.87	806.727	1263.23	-576.323
992	2236	977.912	1701.68	2956.47	1602.25	1752.01	1529.62	2062.06	27.102	91.933	157.347	221.208	26.975	20.112	22.227	29.033	633.75	-774.095	172.059	894.412
993	1587	1569.28	1489.92	1083.53	1365.5	1707.58	1521.53	2452.06	26.991	91.897	156.865	221.186	27.017	19.87	22.13	28.796	221.5	-138.302	-31.617	-1368.53
994	673	1951.81	2120.17	1258.82	1975	1861.82	1978.36	1172.06	27.031	91.953	156.83	220.855	26.996	20.001	22.309	29.012	-1302	89.985	141.807	86.765
995	2380	834.337	1142.02	2311.76	1370.5	1544.93	1761.45	1548.23	27.13	92.016	157.162	221.121	26.89	20.063	21.842	28.887	1009.5	-710.591	-619.432	763.529
996	2123	1216.87	1538.65	1268.23	1724.38	1955.95	1581.09	1727.06	27.238	92.221	157.105	221.231	27.132	19.95	22.061	29.148	398.625	-739.08	-42.436	-458.823
997	1525	1198.8	1736.13	2522.35	1528.25	1956.33	1780.78	1344.12	27.075	92.041	157.018	220.901	27	19.693	21.906	29.048	-3.249	-757.529	-44.642	1178.23
998	2093	1308.23	984.034	1098.82	1661.75	1543.42	1422.37	1345.73	27.041	92.169	156.862	220.942	27.081	20.082	22.114	28.942	431.25	-235.19	-438.339	-246.911
999	1654	931.727	2851.26	1091.77	1919.88	1469.63	1366.18	1790	26.826	91.975	156.886	221.111	26.886	20.017	22.118	29.154	-265.874	-537.901	1485.08	-698.234
1000	1773	1547.19	1971.43	154.118	1333.62	1566.64	1661.03	1264.27	27.053	91.919	156.964	220.97	27.04	20.1	22.095	29.014	439.375	-19.452	310.399	-1110.15
1001	1210	2614.46	856.303	1272.94	1967.5	1869.98	1369.22	1917.5	26.938	92.072	157.029	220.87	26.936	20.058	21.924	28.989	-757.499	744.478	-512.919	-644.558
1002	1479	1387.55	1373.95	1647.06	1724.88	1684.36	1528.15	1519.12	26.87	92.008	157.265	220.876	27.078	19.892	21.97	28.867	-245.874	-296.811	-154.201	127.941
1003	2882	439.759	1901.68	1137.65	1874.38	1889.81	1568.07	1535.15	27.092	92.018	156.878	220.988	27.125	20.04	22.161	28.894	1007.62	-1450.05	333.613	-397.499
1004	1512	1882.53	2253.78	1455.29	1400.25	1695.16	1824.89	1469.56	26.982	92.058	157.129	220.844	26.867	20.114	21.772	28.955	111.75	187.374	428.887	-14.264
1005	1021	1892.57	814.286	1729.41	1503.62	1309.36	1626.89	1702.94	26.957	91.902	157.058	220.9	26.795	20.12	21.926	29.177	-482.624	583.208	-812.604	26.471
1006	1115	2371.49	1684.87	1311.77	1351.12	1505.65	1707.04	1589.41	27.005	92.057	156.984	220.96	27.035	19.781	21.885	28.897	-236.124	865.838	-22.163	-277.646
1007	1712	1264.06	1855.46	1282.35	1684.38	2243.47	1593.38	2022.06	27.072	92.075	157.101	220.905	27.018	19.877	22.056	29.092	27.625	-979.417	262.08	-739.705
1008	1414	1773.09	3148.74	470.588	1579	1632.78	1587.39	2006.77	27.098	92.158	156.765	220.929	26.997	20.246	21.851	28.915	-164.999	140.311	1561.35	-1536.17
1009	1896	1487.95	2363.03	2298.82	1501.88	1606.3	1471.95	1999.27	26.817	91.915	157.039	220.866	26.898	20.167	21.78	28.93	394.125	-118.347	891.071	299.559
1010	1304	1475.9	1940.34	412.941	1759.75	1776.48	1437.08	1552.79	27.006	91.638	156.946	221.018	26.886	19.92	21.868	28.946	-455.749	-300.576	503.256	-1139.85
1011	1450	1501	1673.95	1117.65	1299.75	1294.8	1566.91	1494.56	26.913	92.074	156.93	220.926	27.225	20.014	21.879	29.05	150.25	206.2	107.038	-376.911
1012	2169	1144.58	1721.85	2240	1488.75	1779.62	1658.61	1797.65	26.83	92.078	157.16	220.78	26.997	20.051	21.978	28.911	680.25	-635.039	63.235	442.353
1013	1037	1966.87	1380.67	1517.65	1383	1569.9	1471.43	1760.59	26.929	91.955	157.129	220.96	26.82	19.976	21.859	29.204	-345.999	396.963	-90.755	-242.94
1014	1616	1270.08	1046.22	2502.35	1739.88	1792.92	1771.64	1450.15	27.167	92.14	157.055	221.227	26.96	19.887	22.064	29.143	-123.874	-522.84	-725.419	1052.21
1015	1629	2246.99	2126.05	1485.88	1779.25	1670.93	1621.43	1650.29	26.931	91.986	156.993	220.89	27.172	20.039	22.103	29.247	-150.249	576.054	504.622	-164.411
1016	1170	1986.95	1601.68	1491.77	1303	1826.18	1582.56	1541.91	26.988	91.914	156.887	221.078	27.039	20.045	21.916	29.099	-132.999	160.768	19.118	-50.146
1017	1753	1920.68	1272.27	1288.23	1253.62	1812.25	1576.47	1591.32	26.835	92.044	156.984	221.168	27.139	20.091	22.215	29.109	499.375	108.434	-304.201	-303.087
1018	2277	1337.35	2751.26	734.118	1240.62	1310.74	1280.88	1691.32	27.115	91.795	157.087	221.123	27.226	19.958	21.917	29.054	1036.38	26.606	1470.38	-957.205
1019	831	1454.82	1769.75	1945.88	1705.88	1289.78	1791.91	1485.59	26.978	91.981	156.875	221.126	27.231	20.008	21.991	29.008	-874.874	165.035	-22.163	460.294
1020	1561	1334.34	938.655	1844.71	1644.38	1594.63	1788.23	2070.74	27.017	91.733	157.092	221.088	26.991	19.893	21.974	28.86	-83.374	-260.29	-849.579	-226.028
1021	1564	1737.95	723.529	2056.47	1323.75	1202.69	1463.87	1611.47	27.024	91.99	156.942	221.017	27.039	20.02	22.106	29.33	240.25	535.266	-740.335	445
1022	2215	891.566	1194.12	3242.35	1638.88	2030.5	1809.77	1777.5	26.998	92.044	157.15	221.008	26.991	20.005	21.836	28.792	576.125	-1138.93	-615.65	1464.85
1023	1096	464.859	637.815	1480	1658.88	2078.44	1526.37	1374.27	27.131	92.063	156.859	220.898	27.14	20.032	21.834	29.117	-562.874	-1613.58	-888.549	105.735
1024	508	374.498	1278.15	1175.29	1410.88	2047.06	1469.43	1457.35	26.971	91.836	157.076	221.049	26.998	20.121	21.746	29.21	-902.874	-1672.56	-191.281	-282.058
1025	1787	2809.24	1457.98	1181.18	1518.75	1550.33	1738.76	1529.71	26.99	92.352	156.932	220.919	27.006	19.907	22.096	28.875	268.25	1258.91	-280.776	-348.528
1026	1570	1830.32	2647.9	1500	1915.12	2063.88	1429.31	1619.85	26.998	91.9	156.985	221.147	27.068	19.97	21.713	28.714	-345.124	-233.558	1218.59	-119.852
1027	1573	2410.64	1299.16	2761.18	1224.62	1684.99	1896.74	1507.65	27.305	91.816	157.154	220.986	27.034	20.11	21.925	28.929	348.375	725.653	-597.583	1253.53
1028	2108	1131.53	705.042	1628.23	1326.88	1589.36	1710.4	1636.32	26.804	92.239	157.09	220.808	27.033	20.218	22	28.988	781.125	-457.83	-1005.36	-8.087
1029	907	1583.33	1092.44	1354.12	1543.88	1690.26	1871.32	1502.65	27.023	91.778	157.094	220.871	27.024	19.888	22.24	29.181	-636.874	-106.927	-778.886	-148.528
1030	2400	1326.31	1735.29	3112.94	1701.5	1409.76	1631.72	1688.97	26.988	91.935	156.922	221.299	26.893	20.062	21.585	29.143	698.5	-83.458	103.571	1423.97
1031	1560	2843.37	1678.99	1642.35	1381.62	2329.95	1652.52	1755.88	27.201	92.212	157.281	221.036	26.835	19.646	21.726	28.804	178.375	513.429	26.471	-113.528
1032	760	1714.86	1271.43	1827.06	1873	1705.2	1730.04	1581.18	26.982	92.068	156.857	220.925	27.089	19.826	22.13	28.917	-1113	9.664	-458.612	245.882
1033	700	719.88	991.597	3952.94	1331.12	1696.54	1406.83	1662.35	27.066	92.12	157.149	221.007	26.882	20.019	22.173	28.906	-631.124	-976.656	-415.23	2290.59
1034	1090	1813.25	2560.5	1317.65	1406	1913.53	1676.15	1647.94	26.861	91.812	156.789	220.904	27.253	19.983	21.653	29.031	-315.999	-100.275	884.349	-330.293
1035	648	341.365	1731.93	455.294	2232.62	1997.49	1603.68	1606.03	26.868	92.047	156.892	221.026	26.992	19.874	21.835	29.018	-1584.62	-1656.12	128.256	-1150.73
1036	730	1283.13	1223.53	1994.12	1004.38	1493.1	1723.42	1429.27	27.155	92.007	157.05	220.804	27.219	19.878	21.919	28.893	-274.374	-209.964	-499.894	564.853
1037	1430	1301.2	1142.86	1742.35	1361	2095.38	1339.5	1813.68	27.293	92.063	156.87	220.739	27.049	19.887	22.061	29.013	69	-794.176	-196.638	-71.323
1038	2690	2403.61	2265.55	427.059	1503.62	1299.57	1573.32	1549.12	26.773	91.965	156.995	221.149	26.708	20.139	22.111	29.185	1186.38	1104.04	692.227	-1122.06
1039	806	1610.44	2216.81	1984.71	1646.75	1048.32	1861.45	1593.38	26.87	91.974	156.85	220.822	27.055	19.9	22.083	29.055	-840.749	562.123	355.357	391.324
1040	896	741.968	1428.57	2235.29	1813.25	1558.61	1649.89	1309.41	27.238	91.964	157.001	220.758	27.094	19.918	21.923	28.872	-917.249	-816.641	-221.323	925.882
1041	1418	1764.06	1705.88	1574.12	1506.38	1717.62	1774.68	1163.97	26.811	92.155	156.827	221.093	27.055	20.071	22.126	28.804	-88.374	46.436	-68.802	410.147
1042	2515	1522.09	2340.34	1718.82	1631.62	1400.35	1394.33	1795	26.982	92.106	157.105	220.908	26.817	20.039	22.196	29.036	883.375	121.737	946.008	-76.175
1043	2140	1380.52	638.655	1592.94	1480.88	1641.06	1669.33	2007.21	27.04	92.274	157.062	221.056	26.743	20.086	22.026	28.935	659.125	-260.541	-1030.67	-414.264
1044	1687	1797.19	1659.66	3456.47	1069.5	1331.45	1500.11	1385.88	27.02	91.864	156.638	220.62	26.983	20.168	21.735	29.405	617.5	465.738	159.559	2070.59
1045	1609	814.257	675.63	1140	1871.38	1827.56	1930.78	1772.21	27.072	92.038	157.113	220.916	27.147	20.004	21.843	28.829	-262.374	-1013.3	-1255.15	-632.205
1046	1590	1607.43	1228.57	2428.24	1648.62	1832.71	1408.82	1527.21	26.777	91.899	157.07	221.013	27.25	19.804	22.218	29.068	-58.624	-225.275	-180.251	901.029
1047	2119	385.542	1443.7	2052.94	1289.75	2047.06	1610.5	2057.5	27.026	91.918	156.814	220.973	26.754	19.848	22.35	29.252	829.25	-1661.52	-166.806	-4.558
1048	1757	1658.63	1445.38	1011.76	1622.12	1989.21	1347.27	1442.94	26.829	91.814	156.888	221.022	26.948	20.052	22.134	28.746	134.875	-330.571	98.109	-431.175
1049	2952	3203.82	1569.75	1656.47	1901.25	1413.4	1563.44	1482.79	26.838	91.988	156.877	220.964	26.776	20.114	21.889	29.063	1050.75	1790.41	6.303	173.676
1050	1544	2230.92	586.555	463.529	1280	1319.78	1552	1987.79	26.913	92.15	157.005	220.979	27.009	19.901	21.962	28.969	264	911.145	-965.44	-1524.26
1051	2714	2316.26	1416.81	1483.53	1858.75	1513.68	1723.32	1653.38	26.941	91.738	156.746	220.932	26.979	20.273	22.152	29.08	855.25	802.585	-306.512	-169.852
1052	1224	1400.6	2316.81	2725.88	1383.62	1806.48	1616.39	1855	26.789	91.861	156.737	220.92	26.955	20.176	21.804	29.291	-159.624	-405.872	700.42	870.882
1053	1437	1834.34	296.639	2504.71	1524.5	1076.31	1385.5	1669.27	27.136	92.155	157.012	221.007	27.18	20.014	22.041	29.024	-87.499	758.032	-1088.87	835.441
1054	1506	1106.43	1557.14	1890.59	1917.75	1825.43	1349.16	1581.18	27.192	92.183	156.911	221.029	26.955	20.044	22.272	28.917	-411.749	-719	207.983	309.412
1055	1522	897.59	1786.56	2380	1382.38	1902.99	1780.46	1450.29	27.026	92.061	157.027	221.213	27.041	20.064	21.794	29.007	139.625	-1005.4	6.092	929.706
1056	1430	1384.54	2229.41	2615.29	1477.12	1734.94	1191.07	1540.44	26.779	91.906	157.002	220.944	26.798	19.917	21.82	28.92	-47.124	-350.401	1038.34	1074.85
1057	1757	3788.15	1854.62	3477.65	1507.75	1402.61	1455.88	1359.27	26.72	91.57	157.171	220.981	26.777	20.163	21.97	29.029	249.25	2385.54	398.739	2118.38
1058	739	1908.63	1363.87	1710.59	1654.5	1181.22	1592.12	1895.15	27.058	92.245	156.834	220.872	26.827	20.041	22.056	28.907	-915.499	727.41	-228.255	-184.558
1059	2725	1744.98	1769.75	3625.88	1480.62	1476.03	1756.72	2066.76	27.158	92.208	157.047	220.894	26.947	20.323	22.108	29.076	1244.38	268.951	13.025	1559.12
1060	1319	1094.38	1184.03	2405.88	1746.5	1644.08	1487.92	1343.97	26.809	91.976	157.109	221.04	26.839	20.041	22.165	28.948	-427.499	-549.698	-303.886	1061.91
1061	1955	2150.6	1296.64	960	1866.12	1547.69	1569.33	1280	27.002	92.127	156.995	221.086	26.928	20.073	21.925	28.876	88.875	602.912	-272.688	-319.999
1062	658	1572.29	1478.15	954.118	1354.38	1620.36	1578.15	1737.35	26.904	92.265	157.054	220.967	27.113	20.34	22.104	28.845	-696.374	-48.066	-99.999	-783.234
1063	2402	1432.73	1430.25	1947.06	1703.12	1865.71	1811.24	1688.53	26.87	91.995	156.938	220.938	27.323	20.013	21.911	28.725	698.875	-432.981	-380.986	258.529
1064	2867	1408.63	1440.34	3232.94	1610.88	1470.76	1821.11	1495.29	26.846	91.693	157.063	220.663	27.122	20.227	22.163	29.067	1256.12	-62.122	-380.776	1737.65
1065	1218	713.855	587.395	2040	1759.62	1397.46	1376.58	1349.56	26.907	91.989	156.856	220.989	26.862	20.297	21.973	29.013	-541.624	-683.608	-789.18	690.441
1066	1847	2566.26	836.134	1344.71	1719.88	1549.57	1569.85	1770.29	26.956	91.689	156.873	220.952	27.25	19.605	22.11	28.986	127.125	1016.69	-733.717	-425.587
1067	1028	2211.85	2349.58	2115.29	1401.38	1532.13	1534.35	1195.29	27.083	91.917	157.054	221.018	27.012	20.073	22.04	29.198	-373.374	679.719	815.231	920
1068	1177	1817.27	1753.78	898.824	1571.75	1888.18	1737.71	1596.77	26.906	91.818	156.975	220.982	26.871	20.037	21.862	29.206	-394.749	-70.908	16.071	-697.94
1069	2195	1018.07	1355.46	1083.53	1252.62	1865.34	1779.31	1703.23	26.89	92.103	156.972	220.995	27.379	20.096	21.84	28.86	942.375	-847.263	-423.844	-619.705
1070	2760	808.233	1354.62	1275.29	1245	1192.02	1317.23	1344.71	26.921	91.998	157.212	221.052	26.986	20.038	22.254	29.109	1515	-383.784	37.395	-69.411
1071	2304	2099.4	1724.37	1108.23	1192.12	1616.59	1665.97	1580.29	26.656	92.267	157.151	221.005	27.028	19.938	22.15	29.064	1111.88	482.806	58.403	-472.058
1072	1743	1305.22	1704.2	1332.94	1523.62	1586.22	1305.88	1737.5	27.01	91.977	156.704	220.977	27	19.996	21.615	28.867	219.375	-280.998	398.319	-404.558
1073	597	1284.14	1452.1	1962.35	1255.12	1317.9	1981.2	1302.21	27.026	92.031	157.042	220.744	27.045	20.245	21.82	28.8	-658.124	-33.759	-529.096	660.147
1074	501	738.956	918.487	1641.18	1442.88	1756.4	1693.91	1297.94	27.058	91.815	157.235	220.847	26.845	19.984	21.953	29.161	-941.874	-1017.44	-775.419	343.235
1075	1114	1037.15	815.126	1065.88	1828.25	1855.42	1503.05	1384.41	27.109	91.996	157.182	220.945	27.227	19.839	21.878	28.902	-714.249	-818.272	-687.919	-318.528
1076	2886	1837.35	1563.87	1692.94	1282.5	1394.33	1334.98	1763.82	27.305	92.171	156.896	220.785	27.239	19.875	21.803	29.234	1603.5	443.022	228.887	-70.881
1077	1666	1222.89	1029.41	349.412	1907.5	1815.39	1669.12	2075	26.847	92.176	156.966	221.047	27.138	20.16	21.945	28.98	-241.499	-592.494	-639.705	-1725.59
1078	1464	2021.08	741.176	675.294	1704.12	1643.45	1588.76	1062.06	27.076	92.029	157.003	220.93	26.716	19.848	22.164	29.049	-240.124	377.636	-847.583	-386.764
1079	1520	3000	1816.81	1311.77	1770.25	1662.78	1658.82	1758.68	27.074	92.023	156.795	220.816	26.833	20.183	22.106	29.169	-250.249	1337.22	157.983	-446.911
1080	915	2894.58	1429.41	564.706	1391.25	1537.53	1325.32	1509.27	26.951	92.103	157.116	220.959	26.973	19.789	22.066	28.776	-476.249	1357.05	104.097	-944.558
1081	1408	1446.79	2533.61	2021.18	1711.62	1584.84	1333.51	1512.5	26.751	91.952	156.927	220.963	27.111	19.944	21.689	28.818	-303.624	-138.051	1200.11	508.676
1082	975	1462.85	1517.65	1197.65	1795.5	2022.34	1321.53	1850	27.076	91.986	156.694	221.157	27.097	19.894	21.743	28.879	-820.499	-559.487	196.113	-652.352
1083	2097	871.486	1149.58	1685.88	1615.5	1722.01	1885.29	1680.15	26.989	91.79	156.827	220.576	27.139	20.11	21.899	28.749	481.5	-850.526	-735.713	5.735
1084	1363	1038.15	1931.93	1642.35	1897.25	1321.91	1375.84	1450.29	27.203	91.994	157.08	221.115	27.044	19.763	22.139	28.946	-534.249	-283.759	556.092	192.059
1085	1414	1803.21	703.361	2195.29	1639.75	2125.5	1542.65	1189.27	27.082	92.01	157.012	220.86	27.015	19.917	22.155	28.858	-225.749	-322.288	-839.285	1006.03
1086	1458	2075.3	959.664	2411.76	1590.88	1631.15	1456.51	1806.32	27.062	91.873	156.942	221.222	26.907	20.024	21.882	29.086	-132.874	444.152	-496.848	605.441
1087	1890	1353.41	1156.3	656.471	1478.5	1515.06	1888.76	1932.21	27.372	91.835	156.961	221.108	27.161	19.719	21.955	29.057	411.5	-161.646	-732.457	-1275.73
1088	878	1794.18	1666.39	2764.71	1830	1763.93	1645.48	1231.03	26.954	91.871	156.991	220.947	27.06	20.369	21.905	28.956	-951.999	30.246	20.903	1533.68
1089	1172	979.92	1354.62	1176.47	1332	1627.51	1888.34	1487.94	26.977	92.09	156.977	221.07	26.947	20.124	21.865	28.945	-159.999	-647.589	-533.717	-311.47
1090	820	567.269	1730.25	1665.88	1543.88	1340.86	1659.03	1766.03	26.993	91.851	156.91	221.237	26.959	19.994	21.753	28.696	-723.874	-773.593	71.218	-100.146
1091	1224	1301.2	2137.82	2212.94	1791.62	1691.14	1944.12	1405.88	26.977	91.876	157.279	220.671	26.987	20.072	21.694	28.942	-567.624	-389.934	193.697	807.059
1092	1163	2347.39	1768.07	2285.88	1815.5	1901.48	1527.94	1926.62	27.223	92.393	156.939	221.03	27.098	19.884	22.249	29.146	-652.499	445.909	240.126	359.265
1093	1867	722.892	1410.08	1276.47	1495.75	2026.1	1167.12	1346.91	27.234	91.962	156.892	220.916	27.079	19.921	22.082	29.148	371.25	-1303.21	242.962	-70.44
1094	1095	1949.8	1631.09	600	1106.88	1663.91	1432.35	1530.44	26.961	91.847	156.968	220.93	27.046	20.245	21.869	29.127	-11.874	285.894	198.739	-930.44
1095	1127	2291.16	2747.9	2571.76	1513.88	1499	1997.16	1967.79	27.052	92.179	157.326	220.831	26.831	20.191	22.282	28.986	-386.874	792.169	750.735	603.971
1096	1319	3367.47	1146.22	1432.94	1558.25	1369.98	1407.35	1559.27	26.602	91.93	157.067	221.234	27.284	19.977	21.741	28.983	-239.249	1997.49	-261.133	-126.323
1097	1833	787.149	778.151	1101.18	1307.25	1800.83	1315.13	1426.91	27.266	92.033	157.15	220.792	26.777	20.149	21.923	28.952	525.75	-1013.68	-536.974	-325.734
1098	1239	1403.61	3312.61	745.882	1250.25	1629.89	1555.46	1759.41	26.986	92.017	156.965	221.143	26.935	20.017	22.017	28.93	-11.249	-226.279	1757.14	-1013.53
1099	1292	1609.44	957.143	1344.71	1323.12	1524.97	1511.45	1504.27	27.02	91.911	157.236	220.746	27.146	19.822	21.946	28.949	-31.124	84.463	-554.306	-159.558
1100	3401	1735.94	1551.26	2357.65	1217.25	1621.49	1383.93	1576.62	27.15	91.759	156.944	220.864	27.157	19.989	22.053	29.037	2183.75	114.458	167.332	781.029
1101	1825	1095.38	1333.61	411.765	1125	1980.05	1713.03	1707.79	26.921	92.106	156.802	221.095	27.057	20.099	22.147	28.991	700	-884.663	-379.411	-1296.03
1102	1124	1821.29	1886.56	1555.29	1429.5	1932.73	1367.44	1665.59	27.085	92.075	156.971	221.021	26.855	19.801	22.078	28.947	-305.499	-111.445	519.118	-110.293
1103	1858	4184.74	1023.53	1012.94	1485.38	1590.36	1851.37	1007.94	27.037	91.807	156.651	221.094	26.608	19.892	22.128	28.992	372.625	2594.38	-827.835	5
1104	151	1425.7	1856.3	501.176	1866.62	1021.59	1722.9	2014.41	27.079	91.909	156.942	221.094	27.116	20.025	21.845	28.955	-1715.62	404.116	133.403	-1513.23
1105	2342	868.474	828.571	1792.94	1393.12	1396.96	1211.97	1416.77	27.032	92.09	156.711	221.055	27.01	19.976	21.768	29.225	948.875	-528.488	-383.402	376.176
1106	1470	1019.08	1383.19	1221.18	1627.62	1326.05	1095.8	1778.68	27.082	91.769	156.858	221.002	26.928	19.982	22	29.183	-157.624	-306.977	287.395	-557.499
1107	1995	1916.67	2106.72	2252.94	1698.75	1669.18	1503.36	1837.06	27.116	92.378	157.17	221.009	26.913	20.236	21.71	28.932	296.25	247.49	603.361	415.882
1108	1660	480.924	840.336	703.529	1139.5	1784.89	1496.22	1598.23	26.857	92.062	156.863	220.962	26.925	19.975	22.06	29.012	520.5	-1303.96	-655.881	-894.705
1109	2115	1544.18	3153.78	1220	1022.38	1537.15	1602.52	1457.65	27.064	92.24	157.01	220.994	27.256	19.893	21.777	29.18	1092.62	7.028	1551.26	-237.646
1110	1204	1679.72	476.471	2328.24	1653.12	2116.22	1803.26	1471.32	27.223	91.736	157.008	221.046	26.777	19.646	21.93	29.139	-449.124	-436.495	-1326.79	856.912
1111	1422	1100.4	610.084	2014.12	1735.5	1412.65	1809.77	2377.79	26.926	91.956	157.07	221.19	26.836	19.915	21.899	28.927	-313.499	-312.248	-1199.68	-363.675
1112	1454	1519.08	2051.26	1352.94	1513	1534.51	1323.32	1287.21	26.875	92.116	156.804	221.123	27.136	20.186	22.042	28.983	-58.999	-15.436	727.941	65.735
1113	1398	1798.19	1013.45	955.294	1238.62	1798.82	1504.2	1977.06	27.002	92.174	156.85	221.141	27.097	20.035	21.759	29.028	159.375	-0.627	-490.755	-1021.76
1114	998	1705.82	719.328	1537.65	1779	1543.93	1509.45	2143.68	27.078	91.805	156.937	220.743	27.009	20.106	21.933	29.254	-780.999	161.898	-790.125	-606.028
1115	2110	1142.57	3001.68	1028.23	1347.62	1457.58	1470.06	2036.47	27.113	91.807	157.023	220.772	26.822	19.944	22.247	29.091	762.375	-315.009	1531.62	-1008.23
1116	745	2067.27	1883.19	525.882	1781.62	1385.42	1432.56	1374.12	26.896	92.078	157.117	220.875	26.926	20.025	21.927	28.915	-1036.62	681.852	450.63	-848.234
1117	3531	1227.91	1336.97	1105.88	1523.5	1578.06	1544.96	1268.53	26.901	92.039	157.316	220.942	26.817	19.848	22.063	28.945	2007.5	-350.15	-207.982	-162.646
1118	1433	1652.61	889.916	2909.41	1449.88	1591.24	1540.65	1689.71	27.213	91.835	157.059	221.042	27.065	19.761	21.948	29.225	-16.874	61.37	-650.734	1219.71
1119	1054	1697.79	1497.48	3609.41	1434.25	1560.49	1625.53	1429.27	26.82	92.382	157.208	220.761	26.966	19.916	22.099	28.767	-380.249	137.299	-128.045	2180.15
1120	1136	3555.22	1651.26	1915.29	1413.5	1679.84	1413.13	1747.06	26.989	91.968	156.822	220.946	27.027	20.303	22.053	28.867	-277.499	1875.38	238.13	168.235
1121	1203	1241.97	1757.14	2683.53	1663	1511.17	1334.77	1454.27	27.112	92.115	156.852	221.119	27.25	19.938	21.885	29.031	-459.999	-269.201	422.374	1229.27
1122	1887	2961.85	2477.31	1292.94	1751.12	2013.55	1819.96	1443.23	26.76	92.168	157.06	220.988	26.96	19.937	22.275	28.893	135.875	948.293	657.353	-150.293
1123	1524	2334.34	1788.23	2092.94	1367.25	1383.41	1271.74	1493.97	27.228	92.001	156.94	221.132	27.184	19.617	21.923	29.142	156.75	950.929	516.492	598.971
1124	1875	2301.2	970.588	1138.82	1413.12	1434.99	1092.44	1419.71	27.247	91.856	157.049	220.955	26.996	19.947	22.094	28.866	461.875	866.215	-121.848	-280.881
1125	1629	645.582	2130.25	2548.24	1543.5	1496.11	1371.74	1368.38	26.921	91.868	157.221	220.837	27.039	20.13	21.729	28.795	85.5	-850.526	758.508	1179.85
1126	2509	1645.58	1672.27	1210.59	1387.12	1853.79	1330.46	1400.73	26.864	92.159	156.935	220.987	26.956	20.015	22.008	29.175	1121.88	-208.207	341.807	-190.146
1127	252	932.731	975.63	2052.94	1550	1629.64	1748.85	1149.56	26.914	92.111	156.862	221.029	26.856	19.99	21.818	28.901	-1298	-696.912	-773.213	903.382
1128	1291	1150.6	1370.59	2165.88	1493.88	1779.12	1883.4	1366.47	26.922	92.111	157.129	220.921	27.029	20.182	22.076	29.078	-202.874	-628.513	-512.814	799.412
1129	743	1484.94	2244.54	1236.47	1310.12	1415.41	1747.06	1667.35	27.08	91.965	156.95	221.168	27.174	20.174	21.954	29.09	-567.124	69.528	497.479	-430.881
1130	1894	632.53	2236.97	1352.94	2149	1781.63	1341.07	1860.44	27.018	91.969	156.998	220.883	27.112	20.096	21.95	28.997	-254.999	-1149.1	895.903	-507.499
1131	255	1755.02	839.496	1832.94	1802.12	1308.23	1895.59	1390.29	27.082	91.949	156.944	221.098	27.116	19.974	22.117	29.218	-1547.12	446.787	-1056.09	442.647
1132	2744	2025.1	580.672	858.824	1691.12	1802.59	1930.67	1770.59	26.872	91.976	156.91	220.981	26.932	20.078	22.027	28.887	1052.88	222.515	-1350	-911.764
1133	1474	2311.24	910.084	2169.41	1784.38	1286.02	1718.17	1216.77	26.893	91.717	156.988	221.199	26.949	19.959	22.102	28.798	-310.374	1025.23	-808.087	952.647
1134	2049	1868.47	731.933	1743.53	1147.12	1863.83	1436.45	1869.41	27.088	92.152	156.869	220.854	27.164	19.98	21.929	28.898	901.875	4.644	-704.516	-125.881
1135	2315	1930.72	636.134	2064.71	1583.75	1508.66	1565.44	1569.12	27.06	91.733	157.134	221.224	26.995	20.074	21.964	28.889	731.25	422.063	-929.306	495.588
1136	920	2060.24	524.37	1487.06	1759.75	1691.77	1346.85	1742.94	26.972	91.951	157.04	220.917	26.993	20.199	21.864	29.293	-839.749	368.474	-822.478	-255.881
1137	1373	1153.61	2947.9	2178.82	1544	2014.18	1495.8	1308.53	26.866	91.864	157.133	220.75	27.01	19.865	21.931	29.312	-170.999	-860.566	1452.1	870.294
1138	1236	1142.57	2348.74	2797.65	1268.12	1349.27	2032.98	1525.73	27.1	91.893	157.122	220.967	27.043	20.158	21.96	29.304	-32.124	-206.701	315.756	1271.91
1139	1197	763.052	1295.8	1443.53	1423.25	1606.8	1548.32	1380.73	26.802	92.075	156.764	220.89	26.956	19.946	21.757	29.324	-226.249	-843.749	-252.52	62.794
1140	1158	1298.19	857.983	1143.53	1393.75	1917.55	1709.77	1590.29	26.942	92.039	156.842	221.104	27.021	19.989	21.838	29.088	-235.749	-619.351	-851.785	-446.764
1141	2182	1454.82	1999.16	1111.77	1850.5	1665.29	1601.15	1466.32	27.068	91.89	157.21	221.108	27.288	20.021	22.014	29.051	331.5	-210.466	398.004	-354.558
1142	403	620.482	1288.23	721.176	1638.38	1557.73	1552.73	1507.65	26.939	91.872	156.956	220.957	27.015	20.002	22.162	29.029	-1235.37	-937.248	-264.495	-786.47
1143	1565	1236.95	2226.89	2255.29	1510.5	1668.8	1373.63	1257.65	27.19	91.893	156.959	221.156	27.109	20.09	22.185	28.715	54.5	-431.851	853.256	997.647
1144	782	517.068	1275.63	1844.71	1632.12	1989.08	2031.2	1142.06	27.04	91.921	156.874	220.994	26.894	20.041	22.187	29.207	-850.124	-1472.01	-755.566	702.647
1145	1058	1300.2	1224.37	782.353	1457.88	1423.32	1687.71	1986.77	26.847	92.091	156.838	221.039	26.889	19.656	22.04	29.047	-399.874	-123.116	-463.339	-1204.41
1146	346	1505.02	800	1071.77	1237.88	1753.39	1808.09	2288.38	27.063	92.028	156.864	220.902	26.953	20.211	21.932	29.069	-891.874	-248.367	-1008.09	-1216.62
1147	2205	1846.39	2480.67	408.235	1247.12	1963.35	1652.63	1687.35	27.059	91.933	157.11	220.989	26.89	20.334	21.576	28.952	957.875	-116.967	828.046	-1279.12
1148	1951	1972.89	1626.89	1977.65	1718.75	1308.73	1430.88	1339.56	26.995	92.075	156.948	220.966	27.091	20.171	22.195	29.035	232.25	664.157	196.008	638.088
1149	2456	2408.64	1020.17	1909.41	1734.62	1628.26	1513.44	1780	27.167	92.381	157.048	220.781	27.146	19.888	22.153	29.055	721.375	780.371	-493.276	129.412
1150	1081	995.984	1268.07	1445.88	1794.38	1845.88	1556.3	1687.79	27.069	92.091	157.004	220.83	26.961	19.985	22.004	29.026	-713.374	-849.899	-288.234	-241.911
1151	888	974.9	1136.97	392.941	1327.88	2029.99	1164.5	1367.65	26.842	91.921	156.937	220.881	27.169	20.243	21.852	29.108	-439.874	-1055.09	-27.52	-974.705
1152	2876	1627.51	1789.92	1063.53	1851.75	1787.4	1173.42	1825.29	27.19	91.962	156.932	220.99	27.107	20.054	21.922	29.105	1024.25	-159.889	616.492	-761.764
1153	1148	272.088	1679.83	1392.94	1482.75	1965.24	1234.35	1219.12	27.147	92.058	157.023	220.969	27.006	20.124	21.953	28.818	-334.749	-1693.15	445.483	173.824
1154	1210	3131.53	1081.51	1598.82	1500.25	1354.29	1432.14	1761.91	27.011	91.786	157.027	221.216	26.763	19.84	21.989	28.836	-290.249	1777.23	-350.629	-163.087
1155	885	2038.15	1527.73	444.706	1716.25	1396.46	1516.81	2129.71	26.806	91.823	156.972	220.858	26.8	19.955	21.85	29.047	-831.249	641.692	10.924	-1685
1156	1713	2810.24	879.832	1792.94	1693.75	1691.39	1468.38	1478.23	26.854	92.056	156.989	220.914	26.842	19.744	21.755	28.736	19.25	1118.85	-588.549	314.706
1157	2469	1326.31	877.311	1643.53	1308.88	1480.92	1592.23	1816.18	27.155	92.153	156.998	220.681	26.925	19.804	21.974	29.028	1160.12	-154.617	-714.915	-172.646
1158	1721	1901.61	1921.01	3050.59	1545.12	2051.71	1435.71	1495.15	27.04	91.81	157.225	220.785	27.098	20.118	22.179	28.768	175.875	-150.099	485.294	1555.44
1159	1061	1694.78	1280.67	2155.29	1254	1130.15	1649.37	972.353	26.85	92.028	156.784	221.023	26.88	20.235	21.988	29.055	-192.999	564.634	-368.696	1182.94
1160	1610	1048.19	2168.91	2950.59	1587.12	1494.48	1834.45	1403.09	26.979	91.843	156.994	220.607	26.704	20.11	21.801	28.918	22.875	-446.284	334.454	1547.5
1161	1006	2044.18	3294.12	523.529	1618.62	1490.59	1471.74	1840	27.163	91.897	157.293	221.055	27.109	19.919	22.216	28.917	-612.624	553.589	1822.37	-1316.47
1162	1885	1253.01	1295.8	927.059	1416.62	1415.79	1558.93	1741.47	26.947	92.099	156.962	221.09	26.912	19.993	22.017	29.282	468.375	-162.775	-263.129	-814.411
1163	1952	1802.21	1415.97	2831.76	1562.75	1799.07	1389.39	1821.32	26.95	91.907	156.752	220.884	27.018	20.08	22.118	29.006	389.25	3.138	26.576	1010.44
1164	2445	1463.86	1557.98	3642.35	1355	1620.11	1472.9	1658.53	26.696	92.036	157.054	221.067	27.04	20.031	22.14	28.949	1090	-156.249	85.084	1983.82
1165	2632	463.855	936.134	1575.29	1449.12	1500.75	1320.27	1414.27	27.081	92.021	157.037	220.98	26.758	20.113	22.203	28.92	1182.88	-1036.9	-384.138	161.029
1166	1359	869.478	1630.25	1312.94	1912.75	1978.92	2008.4	1571.77	26.785	91.935	156.983	220.965	27.058	20.332	22.109	29.026	-553.749	-1109.44	-378.15	-258.823
1167	600	81.325	1531.93	1815.29	1190.38	1539.53	1491.91	1432.79	26.807	92.017	156.944	220.605	26.946	20.044	22.023	29.078	-590.374	-1458.21	40.021	382.5
1168	364	1364.46	1810.92	540	1845.88	1482.93	1563.23	1973.09	26.922	92.219	156.747	221.077	26.984	20.27	21.877	28.978	-1481.87	-118.473	247.689	-1433.09
1169	2121	1457.83	1875.63	1300	1322	1155.75	1099.58	1174.27	27.172	91.944	157.216	220.986	27.083	20.12	21.721	29.067	799	302.083	776.05	125.735
1170	1773	1308.23	984.034	2640	1338.88	1747.62	1705.04	1466.77	26.882	91.736	156.929	220.925	26.965	20.011	21.988	28.903	434.125	-439.382	-721.007	1173.23
1171	1762	1310.24	1865.55	780	1300.25	1232.05	1473.85	1573.23	26.784	92.328	156.765	220.994	26.864	20.114	21.809	29.122	461.75	78.188	391.702	-793.234
1172	773	1481.93	979.832	1287.06	1318.62	1808.99	1310.61	1889.12	27.083	92.298	156.88	220.979	26.841	19.937	21.892	29.049	-545.624	-327.057	-330.776	-602.058
1173	1998	980.924	1242.86	583.529	1458	1779.99	1198.21	1855.88	27.187	92.139	156.805	221.001	27.147	20.084	22.132	28.933	540	-799.07	44.643	-1272.35
1174	1719	2052.21	2326.89	2929.41	1585.5	1737.2	1521.85	1657.79	27.045	92.296	157.121	221.148	26.848	19.795	22.05	28.956	133.5	315.01	805.042	1271.62
1175	1562	1740.96	1736.97	2271.76	1358.38	1267.19	1572.06	1749.27	27.249	92.007	157.244	221.132	27.182	19.839	22.01	28.79	203.625	473.77	164.916	522.5
1176	2397	1818.27	1045.38	2476.47	1701	1398.22	1370.8	1516.47	27.043	92.298	156.897	220.855	26.813	20.274	21.941	28.772	696	420.055	-325.419	960
1177	2666	843.373	1039.5	845.882	1917.25	1783.38	1378.47	1217.79	26.83	92.048	157.043	220.875	27.035	20.081	21.903	28.911	748.75	-940.009	-338.97	-371.911
1178	1518	1612.45	2564.71	1425.88	1889.25	1654.74	1335.82	1506.32	26.947	92.037	157.202	220.967	26.93	20.175	21.981	28.924	-371.249	-42.293	1228.89	-80.44
1179	884	1808.23	2275.63	1091.77	1763.88	1760.92	1300.42	1329.56	26.739	92.136	156.731	221.26	27.083	20.052	22.252	28.943	-879.874	47.314	975.21	-237.793
1180	2217	676.707	2739.5	2020	1721.62	1452.31	1612.92	1304.56	27.087	91.977	157.157	221.069	27.133	19.953	22.242	29.129	495.375	-775.601	1126.58	715.441
1181	1385	1422.69	896.639	778.824	1652.38	1122.99	906.408	1677.5	27.036	92.232	156.788	221.068	27.021	20.16	22.181	29.023	-267.374	299.699	-9.768	-898.675
1182	2761	954.819	596.639	1348.23	1600.88	1912.02	1322.9	1611.18	27.269	92.049	157.074	221.031	27.015	19.869	21.962	28.856	1160.12	-957.203	-726.26	-262.94
1183	182	2156.63	984.874	2492.94	1641.12	1653.49	1470.8	1445.88	26.932	92.277	156.91	221.142	26.908	20.101	21.977	29.127	-1459.12	503.138	-485.923	1047.06
1184	720	2574.3	1889.92	1448.23	1273.62	1500.25	1615.65	1426.03	26.861	92.137	157.472	221.308	26.816	20.084	22.279	29.261	-553.624	1074.05	274.265	22.206
1185	1494	3242.97	1960.5	1254.12	1546.5	1835.97	1599.37	1561.62	26.962	92.352	157.004	220.969	26.72	20.015	22.072	28.811	-52.499	1407	361.134	-307.499
1186	1746	2723.9	1996.64	60	1434.38	1550.33	1845.69	1220.29	27.08	91.902	157.015	221.035	26.928	20.032	21.826	28.998	311.625	1173.57	150.945	-1160.29
1187	1350	732.932	1381.51	1098.82	1256.12	1827.18	1974.79	1547.06	26.773	92.013	156.786	220.91	26.953	19.931	22.164	28.942	93.875	-1094.25	-593.276	-448.234
1188	1180	821.285	2404.2	460	1403.5	1724.9	1861.66	1339.41	26.915	92.108	157.117	221.044	26.848	19.984	22.132	28.997	-223.499	-903.613	542.542	-879.411
1189	1629	1495.98	2057.98	1482.35	1562.25	1383.41	2023.21	1531.18	27.169	91.981	157.146	221.026	27.142	19.958	22.117	29.177	66.75	112.575	34.769	-48.823
1190	1120	2692.77	749.58	1004.71	1699	1473.77	1472.79	1800.29	26.886	92.136	157.115	221.152	27.057	20.091	21.957	28.93	-578.999	1219	-723.213	-795.587
1191	1080	2069.28	2380.67	538.824	1811.38	1695.78	1654.31	1881.77	27.145	91.921	156.944	221.004	27.286	19.957	21.971	29.081	-731.374	373.494	726.366	-1342.94
1192	1402	1535.14	1295.8	395.294	1538.62	1636.04	1447.9	1451.62	26.945	92.079	157.213	221.088	26.951	19.938	22.339	28.904	-136.624	-100.903	-152.1	-1056.32
1193	1266	1380.52	2546.22	1076.47	1926.5	1388.55	1199.79	1524.56	27.051	92.257	157.04	221.064	26.963	19.905	22.063	28.928	-660.499	-8.031	1346.43	-448.087
1194	1021	768.072	1374.79	921.176	1405.5	1368.98	1166.07	1751.32	26.994	92.117	156.982	220.978	27.246	20.076	21.935	28.972	-384.499	-600.903	208.718	-830.146
1195	980	1031.12	3636.13	1847.06	1903.75	1469.75	1423.63	1752.21	27.057	91.915	156.871	220.916	26.875	20.047	22.029	28.738	-923.749	-438.629	2212.5	94.853
1196	1070	1874.5	441.176	1456.47	1191.12	1890.44	1676.15	1727.35	26.962	92.135	157.008	220.693	26.945	20.062	21.999	28.819	-121.124	-15.938	-1234.98	-270.881
1197	896	623.494	2612.61	1798.82	1253.25	2097.89	1622.58	1408.97	27.214	92.045	156.796	221.044	26.927	20.058	21.911	29.032	-357.249	-1474.4	990.021	389.853
1198	2399	563.253	2434.45	689.412	1560.5	1697.67	1417.54	1005.88	27.284	91.854	157.16	221.171	26.977	20	22.048	28.789	838.5	-1134.41	1016.91	-316.47
1199	563	2303.21	857.983	1485.88	1215.62	1621.74	1260.61	1470.15	26.938	92.281	156.979	221.163	27.098	20.134	22.21	28.897	-652.624	681.476	-402.625	15.735
1200	1243	1851.41	1065.55	2283.53	1417.5	1629.39	1499.06	1966.32	26.86	92.079	156.944	220.889	27.103	20.435	21.993	28.913	-174.499	222.013	-433.507	317.206
1201	2982	1155.62	1038.65	1388.23	1181.62	1880.77	1655.36	2078.68	26.919	92.046	156.896	220.93	27.118	19.851	21.871	29.13	1800.38	-725.15	-616.701	-690.44
1202	1005	2944.78	1625.21	1375.29	1457.62	1311.87	1457.98	1341.91	27.021	91.763	157.007	221.045	27.012	20.093	21.831	29.003	-452.624	1632.91	167.227	33.382
1203	1343	1678.71	1178.99	2523.53	927.125	1731.68	1987.29	1069.85	27.036	91.996	156.737	220.767	27.022	20.042	21.771	28.756	415.875	-52.961	-808.297	1453.68
1204	1329	2356.43	2012.61	1241.18	1991.88	1769.45	2253.68	1684.71	27.248	92.007	156.687	221.027	27.062	20.099	21.893	29.147	-662.874	586.973	-241.07	-443.528
1205	1962	2582.33	1022.69	2122.35	1514.88	1218	1503.68	1867.35	27.113	92.028	157.1	221.274	26.871	20.022	21.783	28.855	447.125	1364.33	-480.986	255
1206	881	2229.92	3053.78	560	1437.88	1827.69	1828.89	1080.29	26.979	91.952	157.149	220.988	26.981	19.876	22.289	28.832	-556.874	402.234	1224.89	-520.293
1207	1206	720.884	2605.04	1850.59	1701.62	1617.22	1340.23	1262.65	27.017	92.146	156.756	220.725	27.011	19.93	22.183	29.264	-495.624	-896.334	1264.81	587.941
1208	1224	2491.97	1978.99	1154.12	1833.5	1468.25	1585.82	1517.5	26.909	92.271	157.16	220.964	27.021	20.004	21.893	28.794	-609.499	1023.72	393.172	-363.381
1209	1913	929.719	1074.79	1035.29	1272.12	1696.29	1281.09	1570.15	26.929	91.973	157.119	220.801	27.086	19.895	22.158	29.118	640.875	-766.565	-206.302	-534.852
1210	1128	1134.54	578.151	1617.65	1553.88	1647.59	1508.72	1616.32	26.96	91.975	157.197	220.931	26.991	20.235	22.037	29.12	-425.874	-513.051	-930.566	1.324
1211	1499	2426.71	891.597	472.941	1835.38	1215.86	1754.1	1498.53	26.791	91.846	157.173	220.948	26.699	20.152	21.892	29.067	-336.374	1210.84	-862.499	-1025.59
1212	678	1543.17	2192.44	3174.12	1504.88	1824.3	1820.69	1684.41	26.958	92.228	157.208	221.08	26.938	20.043	22.11	28.947	-826.874	-281.123	371.744	1489.71
1213	1859	1084.34	903.361	1192.94	1726.38	1533.38	1128.05	1647.21	27.104	92.25	156.87	220.976	27.049	19.837	22.009	29.158	132.625	-449.045	-224.684	-454.264
1214	1468	2115.46	2165.55	1115.29	1429.5	1630.52	1484.35	1523.82	26.96	92.114	156.805	221.159	26.976	20.034	22.235	28.907	38.5	484.94	681.197	-408.528
1215	3076	2071.28	1651.26	2720	1309.12	1858.18	1295.59	1500.15	27.02	91.905	156.875	221.022	26.997	19.882	22.093	29.016	1766.88	213.102	355.672	1219.85
1216	3058	1305.22	2065.55	1647.06	1621.38	1645.96	1171.22	1530.73	26.978	91.717	156.827	220.843	27.183	20.001	22.182	28.793	1436.62	-340.737	894.328	116.324
1217	1242	2644.58	1491.6	858.824	1752.88	1627.13	1592.65	1428.97	27.282	92.067	157.054	221.175	27.002	19.907	22.025	28.846	-510.874	1017.45	-101.049	-570.146
1218	1535	1910.64	1344.54	2028.23	2048.38	1628.77	1165.02	1321.91	26.882	91.96	156.857	221.257	26.851	19.973	22.236	29.104	-513.374	281.878	179.517	706.324
1219	1652	705.823	1594.96	734.118	1428.5	1457.58	1335.19	1578.23	27.141	92.111	157.103	220.978	27.243	20.115	22.017	28.907	223.5	-751.756	259.769	-844.117
1220	1516	2777.11	1763.87	592.941	1717.88	1508.66	1501.15	1821.91	26.953	91.947	156.909	221.013	26.934	19.814	22.012	29.063	-201.874	1268.45	262.71	-1228.97
1221	1056	853.414	1987.39	1981.18	1725.62	1296.06	1302.52	1316.32	27.013	91.981	157.033	221	27.236	19.831	22.142	29.028	-669.624	-442.645	684.874	664.853
1222	1744	2957.83	2387.39	3621.18	1506.38	1826.43	1516.6	1721.03	27.007	92.084	157.119	220.919	27.113	20.139	22.187	28.902	237.625	1131.4	870.798	1900.15
1223	2167	598.394	1064.71	1027.06	1935.5	1281.25	1812.61	1065.88	27.104	92.099	157.113	221.042	26.703	20.092	22.094	28.746	231.5	-682.855	-747.898	-38.823
1224	1432	925.703	1784.87	2643.53	1767.5	1587.6	1683.93	1320.88	27.127	92.077	156.893	221.084	27.161	19.909	22.169	28.773	-335.499	-661.897	100.945	1322.65
1225	851	421.687	964.706	1677.65	1507	2227.03	1413.34	1543.38	27.005	92.096	156.836	221.124	26.878	19.917	22.179	29.05	-655.999	-1805.35	-448.633	134.265
1226	2118	1733.94	801.681	2938.82	1955	1887.05	1403.36	1816.18	26.793	91.889	157.055	221.138	26.648	19.778	21.803	28.927	163	-153.111	-601.68	1122.65
1227	1932	3272.09	2589.08	1223.53	1197	1809.61	1248.32	1250.29	27.005	92.044	156.757	220.856	27.16	19.829	22.017	28.841	735	1462.47	1340.76	-26.764
1228	823	1185.74	1061.35	1514.12	1667.75	1695.53	1195.06	1321.03	27.049	92.015	157.025	221.132	26.971	20.297	22.08	29.194	-844.749	-509.788	-133.717	193.088
1229	1867	1519.08	1334.45	2356.47	1340.38	1194.78	2039.71	1899.27	26.948	91.953	156.794	220.849	27.036	19.958	21.975	28.736	526.625	324.297	-705.251	457.206
1230	1333	1938.76	1259.66	772.941	1471.25	1253.14	1718.07	1369.85	26.835	92.198	157.224	220.971	27.103	20.157	22.188	28.854	-138.249	685.617	-458.402	-596.911
1231	1848	1323.29	805.882	2032.94	1243.62	1753.51	1711.56	1045.29	27.135	92.146	157.013	221.087	26.779	20.015	22.109	28.848	604.375	-430.22	-905.671	987.647
1232	1447	1944.78	676.471	2258.82	1449.75	1484.06	1477.21	1155.88	26.621	91.839	156.964	220.879	26.805	19.871	22.278	29.107	-2.749	460.718	-800.734	1102.94
1233	1282	1160.64	1089.08	1274.12	1816.25	1500.75	1834.98	1574.71	26.898	91.99	156.976	220.921	27.093	19.671	21.853	29.132	-534.249	-340.109	-745.902	-300.587
1234	1503	1263.05	1190.76	1631.77	1130.5	1984.44	1178.15	1434.71	27.032	92.175	157.029	221.021	26.693	19.796	22.091	28.786	372.5	-721.385	12.605	197.059
1235	2112	1272.09	1266.39	1061.18	1390.62	1483.18	1322.16	1672.06	26.552	92.022	156.903	220.904	27.192	20.052	22.071	29.168	721.375	-211.093	-55.776	-610.881
1236	2310	2184.74	2431.93	1334.12	1895.88	1572.16	1375.53	1366.77	26.791	92.042	156.977	221.011	27.139	19.964	21.95	29.097	414.125	612.575	1056.41	-32.646
1237	2107	946.787	1036.13	917.647	1509	1793.8	1136.77	1714.41	27.263	92.261	157.03	220.831	26.939	19.986	21.956	28.923	598	-847.012	-100.629	-796.764
1238	587	1744.98	1850.42	1671.77	1442.62	1834.96	1528.78	1752.79	26.819	91.964	157.214	221.159	27.095	20.011	21.945	29.001	-855.624	-89.984	321.639	-81.028
1239	1297	1895.58	1460.5	1707.06	1654.38	1753.64	1263.87	1652.94	26.864	92.19	156.873	220.787	27.094	19.778	22.109	28.962	-357.374	141.943	196.639	54.118
1240	1145	1493.98	1736.13	1261.18	1480.38	1388.18	1140.02	1924.41	26.852	91.794	157.011	220.961	26.994	20.029	22.069	28.9	-335.374	105.798	596.113	-663.234
1241	1593	1430.72	889.916	1363.53	1920.75	1467.24	1572.9	1383.68	27.079	91.873	157.001	220.819	27.35	19.778	22.026	28.889	-327.749	-36.52	-682.982	-20.146
1242	1403	857.43	1187.39	1950.59	1733.88	2085.34	1302.42	1204.56	26.977	91.942	156.784	220.806	26.911	19.966	22.008	29.092	-330.874	-1227.91	-115.02	746.029
1243	1166	2023.09	2436.13	1398.82	1621.75	1256.9	1612.39	1339.85	27.355	91.864	157.06	221.022	27.215	19.82	21.909	28.986	-455.749	766.19	823.739	58.971
1244	984	2239.96	1105.88	1695.29	1209	1376.76	1773.63	1366.91	26.952	92.308	156.804	221.329	26.841	20.081	21.883	29.17	-224.999	863.203	-667.751	328.382
1245	584	1803.21	1363.87	1247.06	1334.12	1336.85	1436.56	1929.41	27.112	92.132	157.09	220.979	26.989	19.947	22.067	29.257	-750.124	466.365	-72.688	-682.352
1246	2820	2399.6	1180.67	1714.12	1643.38	1634.16	1612.5	1905.44	26.989	91.91	157.034	221.158	26.965	20.021	21.931	29.128	1176.62	765.437	-431.827	-191.323
1247	642	1462.85	1962.18	1138.82	1493.5	1816.01	1571.85	1819.27	27.144	91.931	156.856	220.95	26.88	19.945	21.812	28.695	-851.499	-353.162	390.336	-680.44
1248	1363	1156.63	2245.38	3316.47	1615	1395.46	1394.96	1638.23	27.048	91.788	156.815	220.945	27.108	19.943	22.158	28.723	-251.999	-238.829	850.42	1678.23
1249	1623	2979.92	2164.71	910.588	2041	1799.2	1705.57	1883.82	27.191	91.988	156.892	221.117	26.897	19.971	21.853	29.103	-417.999	1180.72	459.139	-973.234
1250	1975	2502.01	2344.54	281.176	1431.12	2055.09	1218.28	1491.47	27.079	92.366	157.005	221.007	26.798	19.928	22.266	29.089	543.875	446.913	1126.26	-1210.29
1251	2683	2138.55	1464.71	182.353	1375.75	1854.92	1417.96	1694.56	27.047	92.192	156.835	221.037	26.923	20.048	22.048	28.929	1307.25	283.635	46.744	-1512.2
1252	1873	2279.12	2152.94	1911.77	1763.88	1343.25	1602.1	1128.68	27.084	92.117	157.016	220.835	27.094	20.242	22.096	28.994	109.125	935.868	550.84	783.088
1253	1787	1462.85	2136.97	902.353	1504.62	1784.01	1544.64	1290.15	26.917	92.202	156.828	221.037	27.149	20.078	21.839	29.164	282.375	-321.159	592.332	-387.793
1254	1511	1574.3	507.563	498.824	1855.88	1987.95	1827.84	1631.03	26.93	91.958	157.062	221.016	26.906	20.023	22.087	29.151	-344.874	-413.654	-1320.27	-1132.2
1255	2486	2301.2	2279.83	2303.53	1479.75	1745.86	1717.54	1461.18	27.093	92.15	157.171	221.065	27.459	20.126	21.976	28.752	1006.25	555.346	562.29	842.353
1256	423	1587.35	1605.04	1208.23	1327.12	1563.63	1603.89	945	27.025	91.965	157.128	220.833	26.978	19.968	21.903	29.067	-904.124	23.72	1.155	263.235
1257	1037	634.538	2072.27	1078.82	1416.75	1622.62	1793.17	1400.73	26.893	92.05	156.886	221.027	26.749	19.959	22.208	29.169	-379.749	-988.076	279.097	-321.911
1258	2650	1273.09	2641.18	2390.59	1795	1624.62	1538.87	1526.91	26.883	92.139	157.037	221.213	26.945	20.199	21.993	29.01	855	-351.53	1102.31	863.676
1259	877	300.201	1376.47	2743.53	1915.88	1504.77	1473.74	1767.79	26.999	92.178	156.971	221.243	26.982	19.9	22.192	29.056	-1038.87	-1204.57	-97.268	975.735
1260	684	1905.62	1784.03	2402.35	1503.12	1864.71	1387.18	1650.29	26.856	91.985	157.169	220.94	26.939	20.24	21.884	28.857	-819.124	40.914	396.849	752.059
1261	948	1446.79	1580.67	1150.59	1220.75	1584.46	974.265	1339.12	26.947	92.082	157.183	220.862	26.956	20.075	21.938	28.905	-272.749	-137.675	606.408	-188.528
1262	1403	1716.87	1533.61	1422.35	1452.5	1345.51	1472.06	1986.77	26.757	92.024	157.104	220.749	27.17	20.054	21.723	28.976	-49.499	371.36	61.555	-564.411
1263	1363	2544.18	1326.05	884.706	1469.25	1833.71	1419.01	1527.94	27.22	91.597	157.063	221.036	27.19	20.272	21.946	29.015	-106.249	710.467	-92.961	-643.234
1264	1070	740.964	754.622	1707.06	1221	1516.06	1005.57	1828.97	27.135	92.06	157.051	220.982	27.054	19.962	21.856	29.019	-150.999	-775.099	-250.944	-121.911
1265	1599	2095.38	867.227	1128.23	1635.75	1429.84	1631.62	1885.29	27.162	91.992	157.036	221.075	26.935	20.258	21.913	29.102	-36.749	665.537	-764.39	-757.058
1266	959	3160.64	1525.21	605.882	1611.88	1727.54	1469.54	1714.85	26.955	91.845	156.827	221.167	27.16	20.058	22.063	29.101	-652.874	1433.11	55.672	-1108.97
1267	1130	1042.17	1616.81	1271.77	1488.5	1365.96	1991.81	2149.85	27.258	91.889	156.878	221.094	26.86	19.891	21.848	29.24	-358.499	-323.794	-374.999	-878.087
1268	1930	1635.54	2019.33	2458.82	1543.62	2003.64	1401.68	1330.73	27.15	92.235	157.257	221.092	27.181	19.966	21.903	28.858	386.375	-368.096	617.647	1128.09
1269	1761	1604.42	901.681	907.059	1324.88	1815.39	1294.64	1839.12	26.871	92.177	156.966	220.864	27.056	19.942	22.025	29.103	436.125	-210.968	-392.961	-932.058
1270	1481	1934.74	1691.6	1787.06	1532.88	1337.47	1217.65	1298.68	27.271	92.103	156.928	221.074	27.119	19.702	21.799	29.06	-51.874	597.264	473.95	488.382
1271	2029	1093.37	1535.29	2370.59	1995.5	1591.99	1559.35	1744.56	26.948	92.342	157.182	220.98	26.944	20.234	21.863	28.707	33.5	-498.618	-24.054	626.029
1272	1619	1934.74	1097.48	1211.77	1631.88	1578.94	1296.01	1115.15	26.856	92.074	156.678	220.903	26.795	19.781	22.069	29.056	-12.874	355.798	-198.528	96.618
1273	1540	1176.71	2057.14	462.353	1764.25	1424.95	1200.63	1469.12	26.891	92.169	157.273	221.109	26.843	19.975	22.085	28.878	-224.249	-248.242	856.513	-1006.76
1274	2450	1781.12	3174.79	3305.88	1629.62	2023.59	1359.24	1481.77	27.068	92.057	156.776	220.946	26.776	20.145	21.678	29.172	820.375	-242.469	1815.55	1824.12
1275	2361	1434.74	1663.87	2015.29	1688.38	1155.5	1896.22	1813.23	27.118	91.982	156.836	220.917	27.056	20.078	21.985	29.262	672.625	279.242	-232.352	202.059
1276	1072	2292.17	1181.51	540	1632	1760.67	1667.86	1506.03	26.953	91.874	156.854	220.77	27.357	19.809	22.302	28.858	-559.999	531.501	-486.344	-966.028
1277	1667	300.201	1927.73	2301.18	1600.38	1597.77	1542.02	1508.09	26.979	92.094	157.047	221.195	27.211	20.004	21.872	28.804	66.625	-1297.56	385.714	793.088
1278	2636	2471.89	1378.99	323.529	1755.25	1390.81	1252.84	1467.5	26.997	91.997	156.957	220.955	26.953	20.1	22.119	28.901	880.75	1081.07	126.155	-1143.97
1279	1541	1826.31	1447.06	1975.29	1244.25	1881.9	1530.67	2402.79	27.137	92.209	157.007	221.021	26.782	19.885	22.178	28.885	296.75	-55.596	-83.612	-427.499
1280	2268	2129.52	1842.02	998.824	1502.38	1454.07	1653.26	1675.59	27.146	92.095	157.126	221.017	26.641	20.071	21.815	28.976	765.625	675.452	188.761	-676.764
1281	2473	1826.31	1916.81	1078.82	1656.25	1344.5	1607.56	1671.18	26.812	92.259	157.042	221.075	27.177	20.335	21.976	28.811	816.75	481.802	309.244	-592.352
1282	1040	1171.69	1222.69	2382.35	2005.12	1802.46	1273.21	1739.71	26.706	92.052	157.172	220.801	26.951	19.783	22.183	29.155	-965.124	-630.772	-50.524	642.647
1283	948	1197.79	1563.87	2071.76	1444	1282.76	1276.68	1277.5	26.998	92.222	156.759	221.058	26.982	19.887	22.068	28.888	-495.999	-84.964	287.185	794.265
1284	2880	1154.62	2077.31	458.824	1728.62	1407.25	1229.62	1543.23	26.7	91.911	156.891	221.028	27.206	20.16	22.147	29.068	1151.38	-252.635	847.689	-1084.41
1285	2148	1451.81	1942.86	497.647	1644.75	1488.83	1536.24	1759.85	27.053	91.928	157.269	220.966	26.916	20.083	22.081	28.959	503.25	-37.022	406.618	-1262.2
1286	1171	2683.74	1655.46	1076.47	1433.12	1628.39	1291.07	1745.44	27.302	92.052	157.087	220.988	26.995	20.014	21.794	28.802	-262.124	1055.35	364.391	-668.97
1287	729	3051.2	800	921.176	1504.5	1759.91	1527.31	1352.65	27.11	91.999	156.912	221	27.085	19.926	21.947	29.193	-775.499	1291.29	-727.31	-431.47
1288	1804	1580.32	1496.64	1410.59	1325.12	1641.57	1473.11	1488.68	27.227	92.104	157.025	220.923	26.684	20.103	21.869	28.934	478.875	-61.244	23.529	-78.087
1289	1222	1067.27	1479.83	1964.71	1134	1257.15	1651.47	1744.85	27.09	92.288	156.898	220.996	27.223	19.836	22.206	28.789	88	-189.884	-171.638	219.853
1290	1897	2415.66	956.303	2182.35	1173.5	1577.94	1284.87	1344.56	27.175	92.103	156.678	220.94	26.806	20.315	21.653	29.058	723.5	837.726	-328.57	837.794
1291	1566	1723.9	1099.16	761.176	1268.62	1862.45	1087.29	1609.41	26.817	92.13	157.017	220.955	27.077	19.999	22.065	29.092	297.375	-138.553	11.87	-848.234
1292	339	901.606	1097.48	3116.47	1783.75	1693.78	1476.26	1315.59	27.135	91.93	157.204	220.72	26.978	20.106	22.154	28.73	-1444.75	-792.168	-378.781	1800.88
1293	1215	1768.07	1105.88	2156.47	1846.88	1158.13	1211.66	1313.09	27.021	91.748	157.284	220.801	27.15	19.916	21.946	28.898	-631.874	609.94	-105.776	843.382
1294	1351	1874.5	2330.25	1174.12	1600.88	1586.6	1456.41	1725.59	26.955	92.424	156.95	221.1	26.817	20.248	21.97	29.098	-249.874	287.902	873.845	-551.47
1295	774	3133.53	1889.92	487.059	1737.25	1691.77	2154.2	1831.18	27.157	92.166	157.139	221.161	26.993	20.099	21.934	29.1	-963.249	1441.77	-264.285	-1344.12
1296	2019	1329.32	1585.71	558.824	1426.12	1420.81	1135.71	1664.41	27.095	91.787	156.926	221.03	27.038	19.821	22.027	29.018	592.875	-91.49	450	-1105.59
1297	873	1041.16	1861.35	1794.12	1426.25	1705.57	1353.89	1500.44	27.077	92.132	157.125	220.988	27.221	19.679	22.236	29.08	-553.249	-664.407	507.458	293.676
1298	686	644.578	2090.76	2000	1892.25	1183.61	1388.23	1033.97	27.05	91.91	157.094	221.046	27.015	20.072	21.973	28.906	-1206.25	-539.03	702.521	966.029
1299	1399	486.948	680.672	1178.82	1164.88	1787.02	1541.18	1877.65	26.864	91.936	156.949	221.111	27.07	19.986	21.836	29.096	234.125	-1300.07	-860.503	-698.823
1300	2045	1423.69	1276.47	1241.18	1427.88	1625.63	1422.58	2075.74	26.846	92.14	156.774	221.184	27.092	20.101	21.832	29.097	617.125	-201.932	-146.112	-834.558
1301	1943	3136.55	1188.23	2032.94	1808.38	1472.77	1473.42	1968.97	27.008	92.206	156.95	221.022	27.08	20.021	22.056	29.144	134.625	1663.78	-285.188	63.971
1302	1765	819.277	2178.15	848.235	1615.88	1795.31	1435.61	1481.62	27.307	92.209	156.992	220.816	26.903	20.003	22.24	29.062	149.125	-976.028	742.542	-633.381
1303	1842	960.843	1004.2	348.235	1861.25	2041.16	1786.87	1354.85	26.845	92.222	157.235	221.025	26.899	19.978	22.031	28.986	-19.249	-1080.32	-782.667	-1006.62
1304	1821	1384.54	868.908	1710.59	1225.38	1933.61	1798.42	1965.88	27.161	91.947	156.931	220.991	26.978	20	22.045	29.183	595.625	-549.07	-929.516	-255.293
1305	274	1078.31	717.647	1410.59	1279.5	1797.82	1516.07	886.912	27.064	92.167	156.925	221	26.925	19.986	21.872	28.966	-1005.5	-719.502	-798.423	523.676
1306	2005	1192.77	1406.72	1321.18	1299.62	1501.51	1463.87	1735.15	27.11	91.846	156.938	220.748	26.711	19.976	22.237	29.074	705.375	-308.734	-57.142	-413.97
1307	824	1572.29	1363.03	1670.59	1512.25	1427.21	1098.21	2045.88	27.116	92.221	156.882	220.957	26.801	19.974	21.889	29.074	-688.249	145.08	264.811	-375.293
1308	1351	1196.79	456.303	1487.06	1691.5	2221.51	1392.96	1632.06	26.979	92.005	157.079	221.012	27.14	19.784	21.958	28.903	-340.499	-1024.72	-936.659	-144.999
1309	1189	1914.66	757.143	1844.71	1256	1750.25	1712.08	1582.35	26.824	92.119	156.971	221.034	26.846	19.955	22.059	29.215	-66.999	164.408	-954.936	262.353
1310	1298	1099.4	1743.7	1060	1693.12	1989.08	1564.6	2120	27.033	91.993	157.154	220.929	26.796	19.972	22.191	28.772	-395.124	-889.683	179.097	-1060
1311	1494	2671.69	1451.26	2309.41	1573.88	1519.7	1161.77	1396.91	27.003	91.933	156.869	220.783	27.01	20.018	22.071	29.089	-79.874	1151.98	289.496	912.5
1312	3491	1406.63	1854.62	1628.23	1460	1441.89	1547.58	1668.53	26.871	91.957	156.934	220.912	27.041	20.004	21.944	28.917	2031	-35.265	307.038	-40.293
1313	1515	1378.51	1412.61	680	1229.62	1246.23	1193.7	1857.35	27.001	91.964	156.925	221.085	26.926	20.036	22.205	29.074	285.375	132.279	218.908	-1177.35
1314	795	1159.64	741.176	2838.82	2064.62	1534.51	1260.29	1767.79	26.951	92.02	157.012	220.749	26.989	20.124	22.115	28.966	-1269.62	-374.873	-519.117	1071.03
1315	598	1858.43	1073.11	1605.88	1918.88	1193.65	1417.54	1484.56	26.74	92.012	156.948	221.035	26.811	20.081	22.211	28.971	-1320.87	664.784	-344.432	121.324
1316	2244	1327.31	1386.56	1996.47	1377.38	2039.53	1284.35	2065.29	27.293	91.927	156.996	221.038	27.226	19.848	21.962	28.956	866.625	-712.223	102.206	-68.823
1317	1842	946.787	1227.73	1652.94	1926.75	1845.38	1735.71	1796.62	27.261	91.922	156.972	221.085	26.776	19.78	21.913	28.945	-84.749	-898.593	-507.982	-143.675
1318	1463	2037.15	2305.88	2484.71	1458.38	1814.13	1503.15	1328.82	27.184	91.92	157.037	220.981	26.996	19.916	21.993	28.889	4.625	223.017	802.731	1155.88
1319	891	1622.49	2070.59	2108.24	1205.25	1964.23	1458.61	1921.91	26.953	91.913	156.869	220.928	27.214	19.989	22.238	28.968	-314.249	-341.741	611.975	186.324
1320	609	1348.39	1986.56	1352.94	1711.38	1176.71	1206.3	1746.03	26.903	91.847	156.845	220.801	26.909	20.061	21.686	28.992	-1102.37	171.687	780.252	-393.087
1321	200	1383.53	1055.46	1214.12	1381.75	1677.84	1535.08	1487.94	27.022	91.903	156.97	221.176	26.906	19.711	22.17	29.038	-1181.75	-294.301	-479.621	-273.823
1322	1726	1342.37	1063.87	2736.47	1334.5	1392.7	1676.05	1690	27.188	92.169	156.937	221.006	26.972	20.173	22.217	28.889	391.5	-50.325	-612.184	1046.47
1323	1965	966.867	1277.31	1620	1090.62	1498.24	1141.39	1809.71	27.071	92.046	156.758	220.979	27.028	20.007	22.142	28.948	874.375	-531.375	135.924	-189.705
1324	1378	1987.95	1351.26	2631.76	1262.5	1871.86	1321.95	1766.32	27.104	91.996	156.927	220.953	27.128	19.903	21.754	29.18	115.5	116.089	29.307	865.441
1325	2272	1360.44	1058.82	1205.88	1395.75	1542.8	1642.96	1716.18	26.995	91.842	157.216	220.937	26.595	20.26	22.017	29.006	876.25	-182.353	-584.138	-510.293
1326	1323	626.506	1864.71	977.647	1767.75	1480.92	998.004	1540.29	27.004	92.047	157.184	220.961	27.038	19.753	22.068	28.693	-444.749	-854.417	866.702	-562.646
1327	2287	1101.41	2659.66	2080	1519.38	1503.89	1548.42	1615.15	26.917	92.013	156.984	221.177	27.17	19.933	21.942	29.091	767.625	-402.484	1111.24	464.853
1328	1075	828.313	2138.66	517.647	1883.12	1736.19	1655.88	1339.56	27.242	91.888	157.169	220.956	26.65	20.06	22.18	28.953	-808.124	-907.881	482.773	-821.911
1329	1001	1520.08	1484.87	2058.82	1588	2034.14	1504.31	1224.41	26.821	92.228	156.841	220.997	27.005	19.812	21.965	28.9	-586.999	-514.055	-19.432	834.412
1330	2176	1388.55	1757.98	2304.71	1681.75	1828.19	2102.31	1714.71	26.895	92.098	156.93	221.127	27.065	19.856	21.855	28.922	494.25	-439.633	-344.327	590
1331	1681	1417.67	1183.19	2703.53	1748.12	1773.09	1267.96	1402.5	26.907	92.028	157.099	220.815	26.912	19.987	22.036	28.888	-67.124	-355.421	-84.768	1301.03
1332	1852	2667.67	1246.22	2338.82	2238.25	1377.89	1348.21	1598.82	26.838	92.047	156.808	220.945	26.963	20.131	22.197	29.276	-386.249	1289.78	-101.995	740
1333	1512	2742.97	1589.08	2277.65	1406.12	1958.96	1526.37	1584.85	27.061	91.885	157.065	221.152	26.987	19.645	21.805	28.862	105.875	784.011	62.71	692.794
1334	654	530.12	1828.57	2288.24	1107	1442.27	1672.9	1895.44	26.845	91.918	157.263	220.823	26.852	19.9	21.73	28.787	-452.999	-912.148	155.672	392.794
1335	1588	909.639	1640.34	2317.65	1418.5	1370.86	1473.53	1507.79	27.234	91.988	156.907	220.891	27.066	20.038	22.064	29.2	169.5	-461.219	166.807	809.853
1336	1081	2815.26	922.689	1674.12	1379.88	1524.22	1521.32	1566.91	27.225	92.143	157.045	221.007	26.964	20.058	22.149	28.904	-298.874	1291.04	-598.633	107.206
1337	1875	1408.63	2095.8	1456.47	1527.75	1432.35	1107.77	1425.44	26.671	91.814	157.058	221.122	27.25	19.879	22.061	28.973	347.25	-23.719	988.025	31.029
1338	1199	1924.7	1473.11	1164.71	1798.38	1353.29	1649.27	1609.27	27.249	92.095	157.166	221.153	27.266	19.799	21.936	29.128	-599.374	571.411	-176.154	-444.558
1339	439	1020.08	1511.77	1028.23	1972.25	1621.61	1113.13	1529.41	27.146	92.141	156.903	220.911	26.801	19.699	22.032	29.236	-1533.25	-601.53	398.634	-501.175
1340	2279	1120.48	1894.12	1909.41	1296.88	1414.91	1737.92	1691.62	27.049	92.053	156.851	221.034	27.03	20.233	21.964	29.334	982.125	-294.427	156.197	217.794
1341	1278	1636.55	1195.8	2288.24	1669.88	1142.32	1350.63	1729.85	26.905	91.836	156.691	220.838	27.07	19.958	22.202	28.744	-391.874	494.227	-154.831	558.382
1342	2225	1559.24	557.143	1640	1209.25	1784.51	1739.08	1552.5	26.821	91.957	157.033	221.388	27.216	20.122	21.941	28.987	1015.75	-225.275	-1181.93	87.5
1343	2789	1874.5	2088.24	1435.29	2025.5	1497.62	1875.94	1319.56	26.65	91.935	157.199	221.145	27.318	20.096	21.853	28.834	763.5	376.883	212.29	115.735
1344	1390	2135.54	2362.18	1328.23	1524.25	1394.08	1832.46	1271.91	26.636	91.79	156.824	221.046	26.825	19.968	22.12	29.331	-134.249	741.466	529.727	56.324
1345	345	455.823	1998.32	595.294	1425.38	1506.15	1308.19	1840.73	26.835	91.965	157.083	221.046	26.982	20.036	21.931	29.145	-1080.37	-1050.33	690.126	-1245.44
1346	2171	1588.35	2028.57	1531.77	1433	1321.03	1689.71	1909.27	26.791	91.937	157.041	220.989	27.078	19.755	21.781	28.956	738	267.319	338.866	-377.499
1347	913	717.871	1537.82	2096.47	957.125	1726.66	1632.67	1546.03	26.733	92.088	156.679	221.307	27.01	19.89	22.194	29.024	-44.124	-1008.78	-94.852	550.441
1348	1921	1945.78	1421.01	3004.71	1405	1346.76	949.475	1849.41	26.796	92.002	156.948	221.107	27.093	20.163	21.965	28.759	516	599.021	471.534	1155.29
1349	873	1563.25	630.252	1772.94	1478.5	1809.99	1561.03	1403.82	26.95	91.87	157.075	220.674	27.067	19.899	21.855	28.997	-605.499	-246.736	-930.776	369.118
1350	1846	1736.95	1033.61	318.824	1254.88	1467.49	1936.45	1489.71	27.213	92.249	157.075	220.978	27.203	20.186	22.071	29.005	591.125	269.453	-902.835	-1170.88
1351	2541	604.418	1805.88	965.882	1765	1962.73	1557.88	1787.65	26.602	91.883	156.95	220.782	27.203	19.992	21.906	29.119	776	-1358.31	248.004	-821.764
1352	1338	2144.58	1145.38	2098.82	1772.62	1841.37	1746.11	1659.85	26.918	91.918	156.968	221.214	26.995	20.048	22.334	28.902	-434.624	303.213	-600.734	438.971
1353	1912	1851.41	1047.9	2274.12	1372	1863.45	1639.5	1345.59	26.749	91.937	156.943	221.023	27.174	19.998	21.829	29.275	540	-12.047	-591.596	928.529
1354	2775	1762.05	1194.96	1484.71	1712.38	1454.19	1871.53	1815.59	26.786	91.907	157.214	220.979	27.178	20.111	22.064	29.121	1062.62	307.856	-676.575	-330.881
1355	2008	1821.29	1542.02	1124.71	1500.88	1578.31	1442.75	1398.38	26.96	91.786	157.124	221.083	26.825	20.04	22.002	28.984	507.125	242.972	99.265	-273.675
1356	870	1622.49	1657.14	1965.88	1447.62	1947.04	1645.27	2033.97	26.906	92.024	156.787	221.29	27.056	20.046	22.002	28.922	-577.624	-324.547	11.87	-68.087
1357	3712	2719.88	1168.91	1031.77	1844	1695.16	1656.2	1266.47	26.955	91.745	157.005	220.956	26.738	19.715	21.815	29.006	1868	1024.72	-487.289	-234.705
1358	1731	987.952	958.824	1385.88	1435.25	2153.49	1177.84	1565.73	26.958	92.105	156.85	220.919	27.037	20.17	22.08	29.081	295.75	-1165.54	-219.012	-179.852
1359	1575	1135.54	1595.8	1660	1345.38	1733.18	1978.99	1413.38	26.96	91.951	157.055	221.215	27.208	20.1	21.956	28.806	229.625	-597.64	-383.192	246.618
1360	1141	1269.08	813.445	2092.94	1458.38	1538.65	1227.73	1967.5	26.888	91.683	156.785	220.863	27.062	19.684	21.849	29.258	-317.374	-269.577	-414.285	125.441
1361	2515	1775.1	1834.45	1485.88	1375.88	1137.93	1696.64	1498.82	27.353	91.936	157.312	221.239	26.832	19.867	21.966	28.944	1139.12	637.174	137.815	-12.94
1362	1512	1417.67	680.672	1261.18	1374.75	1643.45	1456.62	1910.29	27.086	92.003	156.948	220.952	27.013	20.081	21.973	28.92	137.25	-225.777	-775.944	-649.117
1363	1225	1051.2	1396.64	4163.53	1598	1601.78	1962.71	1762.21	27.084	92.14	157.066	221.264	26.89	19.975	22.038	29.004	-372.999	-550.576	-566.07	2401.32
1364	2593	1349.4	1132.77	1723.53	1264.62	1534.51	1063.23	1887.06	27.225	91.872	157.026	220.805	26.868	20.27	22.02	29.078	1328.38	-185.114	69.538	-163.528
1365	507	1495.98	794.118	1796.47	1302.12	1619.85	1536.97	1753.97	27.222	92.251	157.229	221.015	27.085	20.082	21.979	29.237	-795.124	-123.869	-742.856	42.5
1366	1173	1604.42	2537.82	1537.65	1577.38	1438.88	1291.49	1723.38	26.86	92.063	156.631	221.01	26.912	19.68	21.914	28.786	-404.374	165.537	1246.32	-185.734
1367	1746	1027.11	1643.7	2744.71	1533	1563	1395.38	1397.35	27.273	91.966	156.92	221.102	27.108	20.031	21.944	29.121	213	-535.893	248.319	1347.35
1368	2071	1993.98	1248.74	2194.12	1484.88	1763.68	1969.43	1791.32	27.073	92.099	156.932	220.874	26.799	19.983	21.673	29.246	586.125	230.296	-720.692	402.794
1369	1616	2055.22	1312.61	976.471	1534.75	1914.78	1528.05	1846.32	27.037	92.114	156.92	220.919	26.955	19.837	21.916	29.092	81.25	140.437	-215.44	-869.852
1370	1623	1637.55	1536.97	2592.94	1509.88	1475.78	1359.45	1242.94	26.876	92.11	156.964	220.885	26.94	19.839	22.067	28.816	113.125	161.772	177.521	1350
1371	1392	1555.22	1599.16	2171.76	2070.38	1394.08	1897.16	1733.23	27.1	92.108	157.129	220.9	26.95	19.915	22.116	29.187	-678.374	161.145	-298.003	438.529
1372	1444	1917.67	1824.37	1208.23	1542.75	1634.41	1386.87	1361.03	27.052	92.005	156.919	220.912	26.941	19.922	21.995	28.933	-98.749	283.258	437.5	-152.793
1373	1280	328.313	1155.46	3168.24	1553.25	1755.02	1353.15	1817.06	26.944	92.028	157.344	221.287	27.213	20.043	21.934	29.287	-273.249	-1426.71	-197.688	1351.18
1374	1468	1271.08	1810.92	2175.29	1520.5	1794.3	1869.22	2038.09	27.114	91.96	157.063	220.911	27.234	19.842	22.161	28.647	-52.499	-523.217	-58.297	137.206
1375	1532	1353.41	1329.41	1696.47	1066	2010.17	1710.92	1630.73	27.011	92.186	156.674	220.744	27.358	20.133	22.125	28.938	466	-656.751	-381.512	65.735
1376	2043	480.924	975.63	1377.65	1430.25	1644.95	1693.7	1846.62	26.925	92.05	157.094	221.072	26.834	19.969	22.039	29.224	612.75	-1164.03	-718.066	-468.97
1377	2291	2977.91	1842.02	1234.12	1050.38	1619.48	1252.94	1666.32	27.131	92.291	156.771	220.784	27.102	20.113	21.965	28.978	1240.62	1358.43	589.076	-432.205
1378	1310	1029.12	755.462	2361.18	1664.25	1709.96	1422.27	1019.26	26.91	91.991	156.868	220.968	26.67	20.135	22.032	28.983	-354.249	-680.847	-666.806	1341.91
1379	1569	666.667	2547.9	1290.59	1662.62	1641.19	1758.82	1713.97	27.204	92.101	156.745	221.097	26.932	19.988	21.858	28.989	-93.624	-974.522	789.076	-423.381
1380	2362	2383.53	477.311	1165.88	1784.25	1432.1	1626.89	1366.32	26.799	91.945	156.969	220.972	26.952	20.219	21.897	29.12	577.75	951.431	-1149.58	-200.44
1381	1405	637.55	2099.16	2605.88	1614	1697.79	1415.97	1862.06	26.761	92.023	156.981	221.131	26.699	20.11	21.945	28.867	-208.999	-1060.24	683.193	743.824
1382	1485	1306.22	731.933	2221.18	1547	1813.63	1102.52	1318.09	27.228	92.228	157.256	221.304	27.264	20.305	22.271	28.94	-61.999	-507.404	-370.587	903.088
1383	1799	1472.89	3237.82	1157.65	1060	1200.3	1537.71	1213.82	27.04	92.24	156.961	221.145	26.958	19.949	22.063	28.91	739	272.59	1700.11	-56.175
1384	2088	419.679	1529.41	623.529	1652.5	1714.86	1492.02	1483.38	27.02	92.041	156.895	220.994	27.341	19.972	21.707	28.974	435.5	-1295.18	37.395	-859.852
1385	763	2032.13	2179.83	1603.53	1412.38	1592.12	1922.37	1401.77	26.997	92.302	156.961	221.215	27.068	20.202	21.929	28.834	-649.374	440.01	257.458	201.765
1386	1606	1785.14	953.782	1961.18	1606.12	1288.65	1602.94	2098.82	26.918	92.202	157.207	221.234	26.903	19.879	21.868	29.147	-0.124	496.486	-649.159	-137.646
1387	1393	1778.11	2343.7	2945.88	1522.75	1529.12	1791.28	1178.38	27.061	92.166	156.596	221.065	26.892	19.975	21.781	29.237	-129.749	248.996	552.416	1767.5
1388	1419	1198.8	2646.22	2016.47	1269.5	1657	1641.81	1914.27	26.937	91.974	157.321	220.957	26.782	20.16	21.861	29.119	149.5	-458.207	1004.41	102.206
1389	1019	1267.07	536.975	1254.12	1336.12	1603.66	1246.01	1581.91	26.927	92.104	156.896	220.819	26.763	20.12	21.991	28.668	-317.124	-336.595	-709.033	-327.793
1390	1528	1545.18	1472.27	585.882	1740.12	1535.27	1235.82	1293.97	26.972	92.314	156.74	220.998	27.027	19.84	21.921	28.919	-212.124	9.915	236.45	-708.087
1391	536	1061.24	1830.25	632.941	1726.38	1716.49	1442.75	1244.85	27.153	92.174	156.738	220.923	26.752	19.755	22.059	29.059	-1190.37	-655.245	387.5	-611.911
1392	1745	2147.59	1384.03	632.941	1582.88	1674.45	1145.59	1703.09	27.269	92.106	156.895	220.943	26.833	19.815	22.076	28.829	162.125	473.143	238.445	-1070.15
1393	662	1177.71	1996.64	1604.71	1024.88	1249.75	1317.54	1630.44	26.93	91.782	157.177	220.938	26.98	20.091	22.275	29.143	-362.874	-72.037	679.097	-25.734
1394	2307	3076.3	1652.1	1575.29	2041	1326.93	1601.47	1166.32	26.91	91.947	156.923	221.091	27.1	20.088	21.982	29.021	266	1749.37	50.63	408.971
1395	1046	1743.98	2583.19	1388.23	1383.25	1328.82	1605.25	1593.09	27.053	92.078	156.963	221.301	27.072	20.072	22.128	29.045	-337.249	415.161	977.941	-204.852
1396	792	1143.57	1578.15	1004.71	1830.38	1679.72	1487.82	1143.53	27.016	92.094	157.13	221.132	26.973	19.828	21.994	28.898	-1038.37	-536.144	90.336	-138.823
1397	3140	1307.23	2274.79	1838.82	1568.38	1700.3	2344.75	2165.88	27.25	91.82	157.171	220.979	27.032	20.235	21.795	29.156	1571.62	-393.071	-69.957	-327.058
1398	949	1711.85	2020.17	3742.35	2102	1670.93	1301.68	1715.44	27.121	91.902	157.261	221.033	27.019	19.812	22.304	28.804	-1153	40.914	718.487	2026.91
1399	1763	1030.12	1117.65	1728.23	1700.5	1606.68	1529.83	1501.62	26.773	91.98	157.071	220.838	27.023	20.107	21.942	29.09	62.5	-576.555	-412.184	226.618
1400	1543	747.992	1191.6	2015.29	1698.75	1680.35	1707.98	1977.65	26.83	91.892	157.049	221.121	26.912	19.927	22.124	29.127	-155.749	-932.353	-516.386	37.647
1401	1557	509.036	550.42	3248.24	1807.5	1497.49	1783.09	1502.65	27.081	91.99	157.129	220.848	26.938	20.045	22.044	28.873	-250.499	-988.453	-1232.67	1745.59
1402	1912	1284.14	2013.44	2947.06	1642.75	1612.07	1306.51	1607.79	27.413	91.883	156.827	220.859	27.089	20.165	22.148	29.102	269.25	-327.936	706.933	1339.27
1403	2363	1754.02	1157.14	1202.35	1610.12	1528.36	1746.74	2027.5	26.913	92.281	156.949	220.985	26.947	20.049	21.966	29.133	752.875	225.653	-589.6	-825.146
1404	1163	2585.34	757.143	1450.59	2179.25	2421.18	1591.91	1160.73	26.897	91.714	157.372	220.927	27.456	19.962	22.038	29.135	-1016.25	164.157	-834.768	289.853
1405	2173	1267.07	2112.61	1561.18	1391.12	1611.19	1857.46	1396.47	27.06	92.102	157.16	221.136	27.206	20.045	22.318	29.112	781.875	-344.126	255.147	164.706
1406	1361	730.924	2260.5	1237.65	1351.62	1920.93	1586.24	1694.12	26.982	92.032	156.982	220.955	26.947	20.081	22.211	28.892	9.375	-1190.01	674.265	-456.47
1407	2390	2837.35	1284.87	1582.35	1354.88	1390.69	1457.98	1284.85	27.338	92.006	156.933	220.766	27.241	19.984	21.999	29.316	1035.12	1446.66	-173.108	297.5
1408	571	2168.68	930.252	2143.53	1592.12	1634.91	1681.51	1875.29	26.964	92.158	156.949	220.913	27.02	19.775	22.023	28.805	-1021.12	533.76	-751.26	268.235
1409	2359	1235.94	2178.99	3568.24	1677	1758.66	1449.06	1889.12	27.078	92.056	157.238	220.822	26.868	20.162	22.278	29.063	682	-522.715	729.937	1679.12
1410	1243	2112.45	1317.65	1050.59	1231.62	1791.67	1724.79	1492.06	26.898	92.219	156.741	221.064	26.915	19.654	21.864	29.018	11.375	320.783	-407.142	-441.47
1411	1237	1472.89	1437.82	2525.88	1641.25	1691.27	1721.01	1645	27.046	92.086	156.869	220.835	26.96	19.924	22.044	29.075	-404.249	-218.372	-283.192	880.882
1412	1335	1413.65	819.328	1835.29	1852.38	1420.56	1853.78	2154.85	27.237	91.904	157.031	221.32	26.886	20.175	22.11	28.843	-517.374	-6.902	-1034.45	-319.558
1413	2499	2948.8	1244.54	955.294	1088.12	1400.85	1355.15	2046.32	27.198	92.325	157.061	221.048	26.995	19.862	22.074	29.004	1410.88	1547.94	-110.608	-1091.03
1414	1303	1594.38	3212.61	1042.35	1440.62	1406.12	1407.14	1324.56	27.072	91.856	157.188	220.871	26.957	20.118	22.019	29.055	-137.624	188.253	1805.46	-282.205
1415	1559	1653.61	1252.94	982.353	1766.62	1528.87	1602.73	1464.41	26.714	91.817	157.081	221.152	27.169	20.08	22.038	28.996	-207.624	124.749	-349.789	-482.058
1416	1866	1427.71	3868.07	572.941	1625.5	1420.93	1915.76	1691.18	27.141	92.11	157.261	220.929	26.93	20.018	21.864	29.011	240.5	6.777	1952.31	-1118.23
1417	370	1361.45	2753.78	1265.88	1706.38	1713.23	1603.47	1624.12	26.891	92.019	156.908	221.135	26.922	19.897	22.112	29.041	-1336.37	-351.781	1150.32	-358.234
1418	1548	3150.6	1342.86	1562.35	1545.62	1609.81	1464.5	1174.27	26.967	91.882	156.951	220.994	27.07	19.737	22.196	29.143	2.375	1540.79	-121.638	388.088
1419	2020	1177.71	1494.12	2071.76	2009.25	1498.62	1445.27	1276.91	27.155	91.972	157.353	221.137	26.984	19.937	21.89	28.921	10.75	-320.908	48.845	794.853
1420	749	1145.58	1947.9	698.824	1863.62	1467.62	1562.71	1899.56	27.059	92.379	157.081	220.944	27.102	20.123	21.998	29.127	-1114.62	-322.037	385.189	-1200.73
1421	1527	1098.39	1729.41	2957.65	1857	1847.77	1728.57	1638.38	26.614	92.116	156.697	220.894	27.013	19.844	21.876	28.949	-329.999	-749.371	0.84	1319.27
1422	2503	1718.88	3027.73	1582.35	1879.75	1849.02	1230.46	1620	26.975	91.989	157.042	220.842	27.453	19.823	22.106	28.722	623.25	-130.145	1797.27	-37.646
1423	1313	1540.16	1455.46	1265.88	1141.38	1522.84	1085.5	1488.09	27.048	91.857	156.809	220.788	26.939	19.98	22.011	29.016	171.625	17.319	369.958	-222.205
1424	1375	2196.79	1862.18	1128.23	1525.25	1487.2	1643.07	1721.77	27.151	91.761	157.083	221.064	27.051	19.826	21.891	29.032	-150.249	709.588	219.118	-593.528
1425	872	1236.95	642.017	1370.59	1630.38	1364.33	1717.65	1792.5	27.024	91.967	157.015	221.187	27.095	20.009	21.847	28.75	-758.374	-127.384	-1075.63	-421.911
1426	754	1564.26	1199.16	590.588	1227.38	1568.15	1739.5	2463.97	26.926	92.157	157.088	220.837	27.127	20.038	21.931	29.164	-473.374	-3.89	-540.335	-1873.38
1427	1643	972.892	1800.84	1909.41	1425	1683.48	1686.24	831.029	27.002	91.915	156.873	221.139	27.116	20.067	22.093	29.022	218	-710.591	114.601	1078.38
1428	1599	2047.19	1339.5	2187.06	2001.5	1844.88	1578.68	1470.15	27.02	92.141	156.912	220.939	26.762	20.136	21.924	28.834	-402.499	202.309	-239.18	716.912
1429	1881	2454.82	1536.97	1608.23	1162.38	1800.45	1707.14	1550.88	27.137	92.004	157.285	220.969	26.73	19.946	22.083	29.208	718.625	654.367	-170.167	57.353
1430	994	2220.88	1270.59	1038.82	1544	1687.63	1121.64	2128.24	27.042	92.177	156.992	221.154	27.092	19.953	22.133	29.012	-549.999	533.258	148.95	-1089.41
1431	1330	1539.16	786.555	1469.41	1530.25	1746.23	1449.89	1371.91	26.817	92.011	157.037	220.914	27.108	19.815	21.905	28.867	-200.249	-207.077	-663.339	97.5
1432	1260	1550.2	1015.13	1388.23	1557.62	1587.6	1476.26	2107.06	26.967	91.702	156.887	221.061	27.04	20.153	21.883	28.798	-297.624	-37.399	-461.133	-718.823
1433	1585	615.462	2270.59	1320	1680.88	1429.97	1514.6	1897.21	26.995	92.089	156.873	220.897	26.901	19.89	21.965	29.036	-95.874	-814.507	755.987	-577.205
1434	1530	185.743	2196.64	2152.94	1207.88	1678.59	1857.46	1992.35	27.124	92.011	157.032	221.056	27.156	20.093	22.071	29.124	322.125	-1492.85	339.181	160.588
1435	2344	2106.43	2114.29	836.471	1806.12	1736.57	1508.09	1262.79	27.077	91.811	157.239	220.813	26.949	20.105	22.05	29.118	537.875	369.854	606.197	-426.323
1436	1378	767.068	1913.44	1927.06	1555.88	1333.33	1436.87	1808.68	26.716	92.058	157.006	220.846	26.784	19.956	22.06	28.915	-177.874	-566.264	476.576	118.382
1437	2154	987.952	1477.31	1248.23	1947.75	1527.86	1197.9	1322.94	26.912	91.943	157.02	220.994	26.978	20.019	22.159	29.173	206.25	-539.909	279.412	-74.705
1438	853	856.426	862.185	823.529	1341.88	1951.93	1485.4	2178.97	26.934	92.089	157.002	221.063	27.107	19.876	22.107	28.911	-488.874	-1095.51	-623.213	-1355.44
1439	1116	1795.18	837.815	1080	1222.5	1574.8	1548.63	1232.65	26.936	91.943	157.119	221.099	27.178	19.98	22.073	28.876	-106.499	220.382	-710.818	-152.646
1440	764	863.454	1429.41	2392.94	1802.5	1578.56	1532.25	1782.21	26.974	91.963	156.817	221.044	27.089	20.023	22.202	29.091	-1038.5	-715.109	-102.835	610.735
1441	754	610.442	905.882	3017.65	1730.75	1863.08	1927.52	2114.12	26.978	92.113	156.987	221.286	27.091	20.004	21.983	29.001	-976.749	-1252.63	-1021.64	903.529
1442	1146	2012.05	1460.5	2998.82	1476	1918.8	1363.03	1700	27.003	91.936	156.972	221.26	26.942	20.303	21.917	28.821	-329.999	93.248	97.479	1298.82
1443	939	1634.54	1742.02	2802.35	1482.75	1419.18	1396.74	1567.5	27.209	92.253	157.051	221.034	27.07	20.111	22.055	29.128	-543.749	215.361	345.273	1234.85
1444	2110	1521.08	2021.01	2067.06	1236.12	1301.58	1884.35	1911.32	27.03	92.01	156.965	220.858	27.061	20.056	21.873	28.795	873.875	219.503	136.66	155.735
1445	1419	2326.3	1660.5	547.059	1141.88	1896.84	1934.56	1447.79	26.907	92.353	156.809	221.005	26.982	19.758	21.849	29.038	277.125	429.468	-274.054	-900.734
1446	853	853.414	1724.37	689.412	1254	1748.12	2021.64	2287.21	27.011	92.094	157.198	220.813	27.048	20.058	21.824	28.962	-400.999	-894.703	-297.268	-1597.79
1447	758	1517.07	1091.6	788.235	1737.75	1645.96	1450.84	1646.62	27.016	92.087	157.122	221.068	27.067	20.015	21.862	28.898	-979.749	-128.89	-359.243	-858.381
1448	853	2074.3	1899.16	971.765	1768.75	1900.85	1362.82	1529.71	27.011	91.897	157.015	220.875	26.878	20.151	21.795	28.938	-915.749	173.444	536.345	-557.94
1449	2283	1479.92	2810.08	1988.23	1638.12	1608.56	1354.62	1605	27.109	92.135	156.912	220.782	26.82	20.075	21.976	29.127	644.875	-128.639	1455.46	383.235
1450	2693	1839.36	1821.01	1341.18	1986.5	1905.75	1963.34	1847.94	27.053	92.21	157.208	220.905	26.984	20.114	22.154	29.128	706.5	-66.39	-142.331	-506.764
1451	1500	2203.82	1828.57	2080	1680.12	1794.43	1509.87	1490.73	27.033	92.045	157.329	220.925	26.986	20.115	21.903	28.964	-180.124	409.388	318.697	589.265
1452	3513	2510.04	997.479	1632.94	1602.88	1687.25	1530.67	1529.12	27.391	92.075	157.117	220.921	27.053	19.76	21.842	28.989	1910.12	822.791	-533.192	103.824
1453	937	1828.31	1429.41	1057.65	1632.25	1777.86	1807.88	1636.91	27.071	91.921	157.028	220.866	26.962	20.247	22.093	29.235	-695.249	50.452	-378.465	-579.264
1454	1604	934.739	693.277	2060	1500.62	1554.72	1391.91	1623.38	27.026	92.115	157.022	220.937	27.11	19.961	21.969	28.869	103.375	-619.979	-698.633	436.618
1455	2593	1373.49	810.084	2162.35	1673.75	1520.21	1898.11	1384.41	26.892	91.902	157.266	221.224	26.96	19.922	21.972	28.892	919.25	-146.711	-1088.02	777.941
1456	1481	1278.11	1203.36	2035.29	1622.62	1896.84	1696.64	1656.32	27.061	92.046	156.977	220.978	27.031	20.221	22.023	29.271	-141.624	-618.724	-493.276	378.971
1457	1372	665.663	1793.28	715.294	2187.12	1300.45	1472.16	1488.97	26.972	92.035	157.142	221.109	26.737	19.961	21.894	29.057	-815.124	-634.788	321.113	-773.675
1458	2168	1369.48	1789.08	1290.59	1472.25	1302.96	1424.47	1462.21	26.871	91.812	156.945	221.08	27.085	20.191	21.727	29.227	695.75	66.516	364.601	-171.617
1459	2040	2257.03	828.571	1925.88	1548.75	1481.93	1209.98	1235	27.1	92.079	156.768	220.814	27.112	19.807	21.925	29.026	491.25	775.1	-381.407	690.882
1460	1443	1892.57	1254.62	2677.65	1625.5	1618.47	1133.93	1456.62	26.774	91.86	156.868	221.043	26.886	20.115	22.137	29.161	-182.499	274.096	120.693	1221.03
1461	2021	1022.09	1478.15	1105.88	1580	1825.68	1537.39	1417.35	26.937	91.993	157.017	220.923	27.27	20.022	22.045	28.955	441	-803.588	-59.243	-311.47
1462	1487	2008.03	2392.44	795.294	1646.12	2029.62	1348.42	1595.29	27.149	92.155	157.032	220.914	26.947	20.088	22.109	29.084	-159.124	-21.585	1044.01	-799.999
1463	1364	1591.37	1754.62	1840	1378.88	1404.74	1657.25	1598.38	27.099	92.024	156.941	221.085	27.027	20.113	22.107	28.92	-14.874	186.621	97.374	241.618
1464	1046	2298.19	2102.52	1523.53	1150	1709.46	1531.2	1553.23	27.073	91.907	157.287	220.946	27.042	20.153	22.291	29.085	-103.999	588.73	571.324	-29.705
1465	2369	2736.95	1330.25	2058.82	1651.88	1286.02	1434.66	1254.56	26.94	91.977	157.178	220.929	27.078	19.845	21.905	29.029	717.125	1450.93	-104.411	804.265
1466	1385	2213.86	1649.58	1315.29	1588.5	1409.01	1281.3	1712.21	27.045	92.348	157.086	221.01	27.094	20.157	22.059	28.816	-203.499	804.844	368.277	-396.911
1467	372	2258.03	2036.97	3388.24	1586.88	1713.48	1600.42	1557.21	27.078	92.015	156.747	220.936	26.882	19.878	22.067	29.252	-1214.87	544.553	436.555	1831.03
1468	889	1271.08	636.975	1409.41	1976.5	1929.59	1810.08	1591.18	26.976	92.115	157.041	221.147	27.171	20.064	22.108	28.904	-1087.5	-658.508	-1173.11	-181.764
1469	647	1462.85	1639.5	1615.29	1839.5	1611.7	1566.49	1723.09	26.855	92.039	157.002	220.815	26.828	19.774	22.024	29.028	-1192.5	-148.844	73.004	-107.793
1470	1418	1114.46	1315.97	2858.82	1774.88	1351.28	1540.97	1658.38	26.976	91.922	156.873	220.84	26.73	19.975	22.065	28.703	-356.874	-236.821	-224.999	1200.44
1471	1185	1619.48	1273.95	1725.88	1858.88	1239.96	1376.58	1678.38	26.953	92.353	157.144	220.952	26.992	20.045	22.091	29.117	-673.874	379.518	-102.625	47.5
1472	1281	2564.26	1604.2	877.647	1755	1209.71	1465.55	1196.77	26.918	91.983	157.11	220.949	26.914	20.368	21.901	29.09	-473.999	1354.54	138.655	-319.117
1473	1869	1877.51	705.042	2547.06	1382.5	1821.79	1136.35	1583.38	26.996	92.029	157.016	220.796	26.952	19.932	22.061	28.906	486.5	55.723	-431.302	963.676
1474	1119	1584.34	2423.53	2511.76	1545	937.123	1536.77	1673.82	27.085	92.073	157.04	220.901	26.9	20.126	22.053	28.902	-425.999	647.214	886.765	837.941
1475	870	1843.37	1036.97	325.882	1599.62	1539.91	1614.92	1735.88	27.232	91.989	156.876	220.958	26.984	20.003	22.004	29.014	-729.624	303.464	-577.94	-1410
1476	2655	1050.2	973.95	3381.18	1597.88	1434.49	1768.49	1453.23	27.191	91.983	157.034	221.192	27.293	20.097	22.114	28.778	1057.12	-384.286	-794.537	1927.94
