# Supplementary material for: Tracking multiple conformations occurring on angstrom-and-millisecond scales in single amino-acid-transporter molecules
Source: eLife. 2023 Feb 17;12:e82175. doi: 10.7554/eLife.82175 (PMC9937647; doi:10.7554/eLife.82175)
Supplement: Figure 3—source data 1. [file elife-82175-fig3-data1.xlsx]

## Sheet: Angle and intensity trace apo p
Angle and intensity trace for [arg]=0 traces
time	I0	I45	I90	I135	Itot	I0	I45	I90	I135	theta - L	phi - L	Omega	state number
0	25	18	5	3	102	35	23	9	11	77	16	22	3
0.01	30	19	6	7	124	35	23	9	11	77	16	22	3
0.02	31	20	9	8	136	35	23	9	11	77	16	22	3
0.03	35	20	9	12	152	35	23	9	11	77	16	22	3
0.04	34	20	7	9	140	35	23	9	11	77	16	22	3
0.05	32	23	7	10	144	35	23	9	11	77	16	22	3
0.06	32	28	9	10	158	35	23	9	11	77	16	22	3
0.07	34	30	11	9	168	35	23	9	11	77	16	22	3
0.08	34	29	11	9	166	35	23	9	11	77	16	22	3
0.09	34	24	9	11	156	35	23	9	11	77	16	22	3
0.1	34	20	7	13	148	35	23	9	11	77	16	22	3
0.11	37	19	6	14	152	35	23	9	11	77	16	22	3
0.12	41	18	7	14	160	35	23	9	11	77	16	22	3
0.13	43	19	8	12	164	35	23	9	11	77	16	22	3
0.14	43	19	9	10	162	35	23	9	11	77	16	22	3
0.15	42	20	8	8	156	35	23	9	11	77	16	22	3
0.16	41	22	7	8	156	35	23	9	11	77	16	22	3
0.17	42	21	8	13	168	35	23	9	11	77	16	22	3
0.18	41	21	9	17	176	35	23	9	11	77	16	22	3
0.19	37	24	9	14	168	35	23	9	11	77	16	22	3
0.2	33	26	8	10	154	35	23	9	11	77	16	22	3
0.21	33	24	8	10	150	35	23	9	11	77	16	22	3
0.22	34	23	8	12	154	35	23	9	11	77	16	22	3
0.23	33	26	8	13	160	35	23	9	11	77	16	22	3
0.24	35	27	9	13	168	35	23	9	11	77	16	22	3
0.25	38	24	9	14	170	35	23	9	11	77	16	22	3
0.26	38	24	9	14	170	35	23	9	11	77	16	22	3
0.27	37	26	10	13	172	35	23	9	11	77	16	22	3
0.28	37	25	12	12	172	35	23	9	11	77	16	22	3
0.29	35	24	14	10	166	35	23	9	11	77	16	22	3
0.3	33	24	12	10	158	35	23	9	11	77	16	22	3
0.31	36	24	8	15	166	41	21	8	18	72	7	23	2
0.32	43	22	7	20	184	41	21	8	18	72	7	23	2
0.33	45	22	9	20	192	41	21	8	18	72	7	19	2
0.34	42	22	9	18	182	41	21	8	18	72	7	19	2
0.35	36	22	7	15	160	41	21	8	18	72	7	19	2
0.36	34	21	7	13	150	41	21	8	18	72	7	19	2
0.37	36	21	8	13	156	41	21	8	18	72	7	19	2
0.38	37	20	8	14	158	41	21	8	18	72	7	19	2
0.39	37	19	7	17	160	41	21	8	18	72	7	19	2
0.4	41	18	8	19	172	41	21	8	18	72	7	19	2
0.41	47	19	9	19	188	41	21	8	18	72	7	19	2
0.42	52	21	9	19	202	41	21	8	18	72	7	19	2
0.43	52	20	8	20	200	41	21	8	18	72	7	19	2
0.44	46	19	8	20	186	41	21	8	18	72	7	19	2
0.45	41	22	9	18	180	41	21	8	18	72	7	19	2
0.46	38	29	9	17	186	38	27	9	13	71	17	30	4
0.47	37	33	9	18	194	38	27	9	13	71	17	30	4
0.48	36	32	7	17	184	38	27	9	13	71	17	30	4
0.49	34	30	7	14	170	38	27	9	13	71	17	25	4
0.5	35	29	8	12	168	38	27	9	13	71	17	25	4
0.51	37	28	9	13	174	38	27	9	13	71	17	25	4
0.52	38	27	11	13	178	38	27	9	13	71	17	25	4
0.53	38	28	12	12	180	38	27	9	13	71	17	25	4
0.54	38	27	10	11	172	38	27	9	13	71	17	25	4
0.55	36	25	10	11	164	38	27	9	13	71	17	25	4
0.56	38	22	11	11	164	38	27	9	13	71	17	25	4
0.57	39	19	11	11	160	38	27	9	13	71	17	25	4
0.58	38	20	10	14	164	38	27	9	13	71	17	25	4
0.59	38	23	9	16	172	38	27	9	13	71	17	25	4
0.6	39	24	8	15	172	38	27	9	13	71	17	25	4
0.61	41	25	8	13	174	38	27	9	13	71	17	25	4
0.62	42	24	6	13	170	42	22	4	14	90	10	12	1
0.63	42	23	4	13	164	42	22	4	14	90	10	12	1
0.64	41	22	4	13	160	42	22	4	14	90	10	12	1
0.65	41	22	4	14	162	42	22	4	14	90	10	12	1
0.66	43	20	4	17	168	42	22	4	14	90	10	12	1
0.67	44	18	3	20	170	42	22	4	14	90	10	4	1
0.68	41	17	3	19	160	42	22	4	14	90	10	4	1
0.69	36	17	3	13	138	34	21	6	10	82	17	13	3
0.7	34	20	3	9	132	34	21	6	10	82	17	13	3
0.71	33	24	5	8	140	34	21	6	10	82	17	20	3
0.72	34	23	8	11	152	34	21	6	10	82	17	20	3
0.73	34	21	9	11	150	34	21	6	10	82	17	20	3
0.74	33	21	9	10	146	34	21	6	10	82	17	20	3
0.75	29	19	7	8	126	36	22	7	11	67	14	32	4
0.76	26	20	7	6	118	36	22	7	11	67	14	32	4
0.77	24	24	11	4	126	36	22	7	11	67	14	32	4
0.78	24	27	16	2	138	36	22	7	11	67	14	39	4
0.79	27	28	16	3	148	36	22	7	11	67	14	39	4
0.8	32	25	10	4	142	36	22	7	11	67	14	39	4
0.81	37	22	5	7	142	36	22	7	11	67	14	26	4
0.82	39	21	4	9	146	36	22	7	11	67	14	26	4
0.83	36	22	6	11	150	36	22	7	11	67	14	26	4
0.84	35	23	8	14	160	36	22	7	11	67	14	26	4
0.85	40	25	9	14	176	36	22	7	11	67	14	26	4
0.86	47	24	9	13	186	36	22	7	11	67	14	26	4
0.87	47	22	8	12	178	36	22	7	11	67	14	26	4
0.88	39	22	6	13	160	36	22	7	11	67	14	26	4
0.89	35	23	6	13	154	36	22	7	11	67	14	26	4
0.9	34	25	7	11	154	36	22	7	11	67	14	26	4
0.91	36	26	7	10	158	36	22	7	11	67	14	26	4
0.92	36	24	6	11	154	36	22	7	11	67	14	26	4
0.93	36	24	6	10	152	36	22	7	11	67	14	26	4
0.94	38	26	7	9	160	36	22	7	11	67	14	26	4
0.95	40	25	7	10	164	36	22	7	11	67	14	26	4
0.96	42	21	7	13	166	36	22	7	11	67	14	26	4
0.97	44	19	7	15	170	36	22	7	11	67	14	26	4
0.98	45	20	8	13	172	36	22	7	11	67	14	26	4
0.99	41	21	10	10	164	36	22	7	11	67	14	26	4
1	35	19	9	10	146	36	22	7	11	67	14	26	4
1.01	32	17	7	11	134	36	22	7	11	67	14	26	4
1.02	30	17	7	10	128	36	22	7	11	67	14	26	4
1.03	31	19	7	10	134	36	22	7	11	67	14	26	4
1.04	34	20	7	11	144	36	22	7	11	67	14	26	4
1.05	36	21	9	11	154	36	22	7	11	67	14	26	4
1.06	35	25	12	11	166	36	22	7	11	67	14	26	4
1.07	36	27	12	13	176	36	22	7	11	67	14	26	4
1.08	37	25	9	16	174	36	22	7	11	67	14	26	4
1.09	34	22	7	16	158	36	22	7	11	67	14	26	4
1.1	33	22	7	13	150	36	22	7	11	67	14	26	4
1.11	36	22	7	10	150	36	22	7	11	67	14	26	4
1.12	40	19	6	11	152	36	22	7	11	67	14	26	4
1.13	40	18	6	13	154	36	22	7	11	67	14	26	4
1.14	37	21	7	13	156	36	22	7	11	67	14	26	4
1.15	33	23	6	13	150	36	22	7	11	67	14	26	4
1.16	34	21	5	15	150	36	22	7	11	67	14	26	4
1.17	38	17	4	16	150	40	16	6	15	68	5	22	2
1.18	41	16	5	15	154	40	16	6	15	68	5	22	2
1.19	41	16	7	15	158	40	16	6	15	68	5	22	2
1.2	40	19	7	15	162	40	16	6	15	68	5	22	2
1.21	39	24	6	12	162	39	30	5	12	90	18	20	3
1.22	37	30	5	11	166	39	30	5	12	90	18	20	3
1.23	40	32	4	12	176	39	30	5	12	90	18	20	3
1.24	43	31	5	12	182	39	30	5	12	90	18	20	3
1.25	39	30	5	9	166	39	30	5	12	90	18	21	3
1.26	38	26	4	10	156	39	30	5	12	90	18	21	3
1.27	41	19	3	15	156	49	16	2	19	90	0	2	1
1.28	46	13	2	19	160	49	16	2	19	90	0	2	1
1.29	49	10	1	20	160	49	16	2	19	90	0	2	1
1.3	52	12	1	21	172	49	16	2	19	90	0	2	1
1.31	55	16	1	20	184	49	16	2	19	90	0	2	1
1.32	53	22	3	18	192	49	16	2	19	90	0	11	1
1.33	47	26	5	15	186	49	16	2	19	90	0	11	1
1.34	40	25	7	10	164	36	19	6	10	87	14	16	3
1.35	35	24	7	8	148	36	19	6	10	87	14	16	3
1.36	33	23	7	10	146	36	19	6	10	87	14	16	3
1.37	33	20	7	13	146	36	19	6	10	87	14	16	3
1.38	36	18	7	15	152	36	19	6	10	87	14	16	3
1.39	37	19	6	14	152	36	19	6	10	87	14	16	3
1.4	37	19	4	10	140	36	19	6	10	87	14	15	3
1.41	37	19	4	7	134	36	19	6	10	87	14	15	3
1.42	36	19	4	8	134	36	19	6	10	87	14	13	3
1.43	38	18	3	12	142	36	19	6	10	87	14	13	3
1.44	43	16	3	16	156	48	17	4	18	86	3	-4	1
1.45	48	16	4	18	172	48	17	4	18	86	3	-4	1
1.46	50	16	4	21	182	48	17	4	18	86	3	-4	1
1.47	52	17	3	28	200	48	17	4	18	86	3	4	1
1.48	52	17	2	31	204	48	17	4	18	86	3	4	1
1.49	50	17	3	26	192	48	17	4	18	86	3	-6	1
1.5	46	19	5	18	176	48	17	4	18	86	3	-6	1
1.51	43	19	8	15	170	48	17	4	18	86	3	-6	1
1.52	42	18	11	16	174	48	17	4	18	86	3	-6	1
1.53	44	18	11	18	182	48	17	4	18	86	3	-6	1
1.54	49	19	9	18	190	48	17	4	18	86	3	-6	1
1.55	54	19	5	21	198	53	21	5	21	78	5	12	2
1.56	53	21	4	21	198	53	21	5	21	78	5	12	2
1.57	46	24	6	17	186	53	21	5	21	78	5	12	2
1.58	40	25	9	12	172	38	24	10	11	76	17	22	3
1.59	36	23	11	10	160	38	24	10	11	76	17	22	3
1.6	32	23	9	11	150	32	22	8	14	65	15	28	4
1.61	32	22	6	16	152	32	22	8	14	65	15	28	4
1.62	38	19	5	24	172	38	22	7	20	67	9	24	2
1.63	45	20	5	26	192	38	22	7	20	67	9	24	2
1.64	45	22	7	20	188	38	22	7	20	67	9	24	2
1.65	37	25	10	11	166	38	22	7	20	67	9	24	2
1.66	30	29	11	6	152	38	22	7	20	67	9	24	2
1.67	29	30	9	6	148	31	29	6	9	90	22	24	3
1.68	31	29	6	9	150	31	29	6	9	90	22	24	3
1.69	37	24	4	14	158	31	29	6	9	90	22	24	3
1.7	46	18	2	19	170	46	18	3	21	90	2	4	1
1.71	51	16	2	18	174	46	18	3	21	90	2	4	1
1.72	52	14	3	17	172	46	18	3	21	90	2	4	1
1.73	55	13	3	23	188	46	18	3	21	90	2	2	1
1.74	55	14	4	28	202	46	18	3	21	90	2	2	1
1.75	48	19	4	25	192	46	18	3	21	90	2	2	1
1.76	42	21	4	21	176	46	18	3	21	90	2	4	1
1.77	43	20	2	22	174	46	18	3	21	90	2	4	1
1.78	42	18	2	22	168	46	18	3	21	90	2	4	1
1.79	40	18	3	21	164	46	18	3	21	90	2	4	1
1.8	36	21	4	18	158	46	18	3	21	90	2	4	1
1.81	32	25	6	11	148	32	26	8	8	77	22	26	3
1.82	30	27	7	5	138	32	26	8	8	77	22	26	3
1.83	31	27	9	6	146	32	26	8	8	77	22	26	3
1.84	34	25	10	13	164	32	26	8	8	77	22	26	3
1.85	41	20	7	20	176	50	14	3	25	90	-3	2	1
1.86	48	15	4	25	184	50	14	3	25	90	-3	2	1
1.87	52	13	3	27	190	50	14	3	25	90	-3	2	1
1.88	55	13	2	27	194	50	14	3	25	90	-3	2	1
1.89	51	14	3	25	186	50	14	3	25	90	-3	2	1
1.9	44	15	3	21	166	50	14	3	25	90	-3	2	1
1.91	38	17	4	14	146	37	18	6	14	69	8	22	2
1.92	37	20	6	11	148	37	18	6	14	69	8	22	2
1.93	39	21	5	14	158	37	18	6	14	69	8	22	2
1.94	38	19	5	17	158	37	18	6	14	69	8	22	2
1.95	33	16	6	18	146	37	18	6	14	69	8	22	2
1.96	30	13	8	17	136	37	18	6	14	69	8	22	2
1.97	30	14	7	15	132	37	18	6	14	69	8	22	2
1.98	34	16	6	13	138	37	18	6	14	69	8	22	2
1.99	36	17	5	13	142	37	18	6	14	69	8	22	2
2	34	18	6	13	142	37	18	6	14	69	8	22	2
2.01	32	18	6	12	136	37	18	6	14	69	8	22	2
2.02	33	18	5	9	130	37	18	6	14	69	8	22	2
2.03	37	19	4	9	138	37	18	6	14	69	8	22	2
2.04	44	20	4	11	158	37	18	6	14	69	8	22	2
2.05	47	22	6	14	178	37	18	6	14	69	8	22	2
2.06	50	21	7	17	190	37	18	6	14	69	8	22	2
2.07	56	18	5	21	200	37	18	6	14	69	8	22	2
2.08	55	15	3	23	192	49	13	3	27	90	-6	4	1
2.09	47	14	3	22	172	49	13	3	27	90	-6	4	1
2.1	45	13	3	24	170	49	13	3	27	90	-6	4	1
2.11	49	12	2	27	180	49	13	3	27	90	-6	4	1
2.12	49	11	1	27	176	49	13	3	27	90	-6	4	1
2.13	49	12	2	28	182	49	13	3	27	90	-6	4	1
2.14	50	16	6	29	202	49	13	3	27	90	-6	4	1
2.15	53	18	9	29	218	53	18	5	28	72	-4	17	2
2.16	55	19	8	28	220	53	18	5	28	72	-4	17	2
2.17	53	18	4	28	206	53	18	5	28	72	-4	17	2
2.18	44	16	4	25	178	53	18	5	28	72	-4	17	2
2.19	36	16	5	21	156	53	18	5	28	72	-4	17	2
2.2	37	16	4	20	154	45	17	4	19	90	3	2	1
2.21	44	16	2	20	164	45	17	4	19	90	3	2	1
2.22	48	18	3	18	174	45	17	4	19	90	3	8	1
2.23	46	21	4	14	170	45	17	4	19	90	3	8	1
2.24	38	22	6	12	156	36	22	9	9	86	17	19	3
2.25	33	21	9	9	144	36	22	9	9	86	17	19	3
2.26	34	21	12	9	152	36	22	9	9	86	17	19	3
2.27	36	22	11	8	154	36	22	9	9	86	17	19	3
2.28	38	22	8	9	154	36	22	9	9	86	17	19	3
2.29	40	19	5	13	154	40	17	5	13	74	8	18	2
2.3	40	17	5	13	150	40	17	5	13	74	8	18	2
2.31	40	16	6	13	150	40	17	5	13	74	8	22	2
2.32	44	16	5	16	162	52	14	3	26	90	-4	1	1
2.33	48	16	4	20	176	52	14	3	26	90	-4	1	1
2.34	53	14	2	22	182	52	14	3	26	90	-4	1	1
2.35	56	12	2	24	188	52	14	3	26	90	-4	1	1
2.36	55	13	2	28	196	52	14	3	26	90	-4	1	1
2.37	51	16	2	30	198	52	14	3	26	90	-4	1	1
2.38	48	19	3	27	194	52	14	3	26	90	-4	1	1
2.39	47	21	4	20	184	52	14	3	26	90	-4	1	1
2.4	50	23	5	13	182	52	14	3	26	90	-4	11	1
2.41	56	20	4	13	186	52	14	3	26	90	-4	11	1
2.42	58	16	2	20	192	52	14	3	26	90	-4	3	1
2.43	57	15	2	26	200	52	14	3	26	90	-4	3	1
2.44	57	16	3	28	208	52	14	3	26	90	-4	3	1
2.45	58	16	4	27	210	52	14	3	26	90	-4	3	1
2.46	56	14	5	28	206	52	14	3	26	90	-4	3	1
2.47	51	12	4	31	196	52	14	3	26	90	-4	3	1
2.48	51	12	3	30	192	52	14	3	26	90	-4	3	1
2.49	56	14	2	29	202	52	14	3	26	90	-4	3	1
2.5	57	14	1	30	204	52	14	3	26	90	-4	3	1
2.51	57	13	1	29	200	52	14	3	26	90	-4	3	1
2.52	54	12	1	27	188	52	14	3	26	90	-4	3	1
2.53	49	12	2	25	176	52	14	3	26	90	-4	3	1
2.54	47	12	4	21	168	52	14	3	26	90	-4	3	1
2.55	46	13	3	19	162	52	14	3	26	90	-4	3	1
2.56	44	16	3	20	166	52	14	3	26	90	-4	3	1
2.57	38	21	4	17	160	52	14	3	26	90	-4	3	1
2.58	35	24	5	13	154	35	22	5	12	80	14	18	3
2.59	37	22	4	12	150	35	22	5	12	80	14	18	3
2.6	34	20	6	11	142	35	22	5	12	80	14	18	3
2.61	25	20	10	9	128	25	21	10	11	56	15	36	4
2.62	25	21	10	11	134	25	21	10	11	56	15	36	4
2.63	36	21	7	19	166	25	21	10	11	56	15	36	4
2.64	50	18	5	25	196	56	15	4	25	88	-1	0	1
2.65	56	14	4	27	202	56	15	4	25	88	-1	0	1
2.66	58	13	4	25	200	56	15	4	25	88	-1	0	1
2.67	57	15	3	22	194	56	15	4	25	88	-1	0	1
2.68	50	21	5	18	188	56	15	4	25	88	-1	0	1
2.69	41	25	8	12	172	41	25	8	10	69	16	26	4
2.7	36	25	9	9	158	41	25	8	10	69	16	26	4
2.71	41	19	7	10	154	41	25	8	10	69	16	26	4
2.72	50	14	4	14	164	49	16	4	22	81	-1	3	1
2.73	51	12	3	17	166	49	16	4	22	81	-1	3	1
2.74	49	15	3	19	172	49	16	4	22	81	-1	3	1
2.75	51	18	3	22	188	49	16	4	22	81	-1	-7	1
2.76	50	16	3	27	192	49	16	4	22	81	-1	-7	1
2.77	49	16	4	30	198	49	16	4	22	81	-1	-7	1
2.78	48	19	5	29	202	49	16	4	22	81	-1	-7	1
2.79	43	23	8	23	194	49	16	4	22	81	-1	-7	1
2.8	39	24	10	18	182	49	16	4	22	81	-1	-7	1
2.81	43	20	8	20	182	49	16	6	20	69	1	20	2
2.82	49	16	6	22	186	49	16	6	20	69	1	20	2
2.83	49	14	5	18	172	49	16	6	20	69	1	20	2
2.84	41	17	5	11	148	41	21	5	11	83	11	14	3
2.85	37	21	5	8	142	41	21	5	11	83	11	14	3
2.86	43	21	4	14	164	41	21	5	11	83	11	14	3
2.87	52	19	4	19	188	53	14	2	24	90	-3	2	1
2.88	56	15	3	23	194	53	14	2	24	90	-3	2	1
2.89	56	11	2	26	190	53	14	2	24	90	-3	2	1
2.9	53	11	2	26	184	53	14	2	24	90	-3	2	1
2.91	53	13	3	24	186	53	14	2	24	90	-3	2	1
2.92	56	15	3	23	194	53	14	2	24	90	-3	2	1
2.93	56	16	2	22	192	53	14	2	24	90	-3	2	1
2.94	56	15	1	20	184	53	14	2	24	90	-3	2	1
2.95	56	14	0	21	182	53	14	2	24	90	-3	2	1
2.96	54	14	0	23	182	53	14	2	24	90	-3	2	1
2.97	53	12	1	25	182	53	14	2	24	90	-3	2	1
2.98	50	11	2	25	176	53	14	2	24	90	-3	2	1
2.99	48	12	2	26	176	53	14	2	24	90	-3	2	1
3	47	15	2	29	186	53	14	2	24	90	-3	2	1
3.01	45	18	3	30	192	53	14	2	24	90	-3	2	1
3.02	38	22	6	26	184	53	14	2	24	90	-3	2	1
3.03	30	25	9	17	162	30	25	9	12	61	18	34	4
3.04	28	26	9	12	150	30	25	9	12	61	18	34	4
3.05	32	22	8	11	146	30	25	9	12	61	18	34	4
3.06	37	17	6	13	146	48	16	5	22	73	0	16	2
3.07	40	16	4	15	150	48	16	5	22	73	0	16	2
3.08	43	17	3	18	162	48	16	5	22	73	0	16	2
3.09	47	15	3	20	170	48	16	5	22	73	0	16	2
3.1	47	12	4	23	172	48	16	5	22	73	0	16	2
3.11	47	11	6	25	178	48	16	5	22	73	0	16	2
3.12	49	10	6	25	180	48	16	5	22	73	0	16	2
3.13	47	13	5	22	174	48	16	5	22	73	0	16	2
3.14	43	16	5	22	172	48	16	5	22	73	0	16	2
3.15	44	16	4	28	184	48	16	5	22	73	0	16	2
3.16	50	14	4	31	198	48	16	5	22	73	0	16	2
3.17	52	14	5	30	202	48	16	5	22	73	0	16	2
3.18	53	15	5	27	200	48	16	5	22	73	0	16	2
3.19	53	14	4	24	190	48	16	5	22	73	0	16	2
3.2	51	14	4	20	178	48	16	5	22	73	0	16	2
3.21	42	15	5	15	154	48	16	5	22	73	0	16	2
3.22	37	17	5	13	144	48	16	5	22	73	0	16	2
3.23	39	19	5	14	154	48	16	5	22	73	0	16	2
3.24	40	23	5	14	164	48	16	5	22	73	0	16	2
3.25	40	25	7	15	174	48	16	5	22	73	0	16	2
3.26	45	21	7	19	184	48	16	5	22	73	0	16	2
3.27	49	16	8	22	190	48	16	5	22	73	0	16	2
3.28	49	14	7	21	182	48	16	5	22	73	0	16	2
3.29	52	13	6	22	186	48	16	5	22	73	0	16	2
3.3	57	14	5	25	202	48	16	5	22	73	0	16	2
3.31	56	15	5	27	206	48	16	5	22	73	0	16	2
3.32	51	17	5	27	200	48	16	5	22	73	0	16	2
3.33	50	18	6	27	202	48	16	5	22	73	0	16	2
3.34	55	16	5	28	208	48	16	5	22	73	0	16	2
3.35	57	15	4	27	206	48	16	5	22	73	0	16	2
3.36	51	17	2	24	188	48	16	5	22	73	0	16	2
3.37	49	20	2	23	188	48	16	5	22	73	0	16	2
3.38	49	20	4	23	192	48	16	5	22	73	0	16	2
3.39	43	20	5	19	174	48	16	5	22	73	0	16	2
3.4	36	20	6	15	154	48	16	5	22	73	0	16	2
3.41	35	19	8	15	154	48	16	5	22	73	0	16	2
3.42	42	18	7	17	168	48	16	5	22	73	0	16	2
3.43	52	16	4	20	184	48	16	5	22	73	0	16	2
3.44	56	15	4	21	192	48	16	5	22	73	0	16	2
3.45	50	16	6	21	186	48	16	5	22	73	0	16	2
3.46	40	21	8	20	178	48	16	5	22	73	0	16	2
3.47	30	27	10	17	168	48	16	5	22	73	0	16	2
3.48	27	29	12	12	160	27	22	11	8	63	22	35	4
3.49	28	25	11	9	146	27	22	11	8	63	22	35	4
3.5	27	23	11	8	138	27	22	11	8	63	22	35	4
3.51	26	22	12	7	134	27	22	11	8	63	22	35	4
3.52	27	19	10	7	126	27	22	11	8	63	22	35	4
3.53	34	14	7	12	134	27	22	11	8	63	22	35	4
3.54	43	14	4	17	156	43	14	4	17	82	1	-7	1
3.55	46	14	3	19	164	43	14	4	17	82	1	-7	1
3.56	42	15	4	17	156	43	14	4	17	82	1	-7	1
3.57	38	17	4	14	146	40	20	4	16	79	8	14	2
3.58	39	20	4	13	152	40	20	4	16	79	8	14	2
3.59	42	22	5	17	172	40	20	4	16	79	8	14	2
3.6	40	21	7	18	172	40	20	4	16	79	8	20	2
3.61	36	19	11	16	164	32	21	11	12	59	16	34	4
3.62	34	19	12	13	156	32	21	11	12	59	16	34	4
3.63	32	21	11	12	152	32	21	11	12	59	16	34	4
3.64	30	25	10	10	150	32	21	11	12	59	16	34	4
3.65	30	26	8	12	152	32	21	11	12	59	16	34	4
3.66	33	22	6	16	154	38	16	6	17	75	1	14	2
3.67	35	18	5	17	150	38	16	6	17	75	1	14	2
3.68	38	16	6	17	154	38	16	6	17	75	1	14	2
3.69	44	15	8	21	176	38	16	6	17	75	1	14	2
3.7	54	15	8	26	206	38	16	6	17	75	1	14	2
3.71	64	14	7	30	230	64	14	6	30	81	-6	-9	1
3.72	64	14	5	32	230	64	14	6	30	81	-6	-9	1
3.73	56	17	6	28	214	64	14	6	30	81	-6	-9	1
3.74	51	19	8	22	200	53	18	8	22	67	0	21	2
3.75	55	17	7	22	202	53	18	8	22	67	0	21	2
3.76	60	14	4	25	206	52	13	3	26	90	-4	2	1
3.77	58	12	3	27	200	52	13	3	26	90	-4	2	1
3.78	56	14	3	27	200	52	13	3	26	90	-4	2	1
3.79	56	15	3	26	200	52	13	3	26	90	-4	2	1
3.8	54	14	3	25	192	52	13	3	26	90	-4	2	1
3.81	55	15	2	24	192	52	13	3	26	90	-4	2	1
3.82	57	18	1	25	202	52	13	3	26	90	-4	2	1
3.83	58	20	2	26	212	52	13	3	26	90	-4	2	1
3.84	55	19	3	27	208	52	13	3	26	90	-4	2	1
3.85	50	16	5	25	192	52	13	3	26	90	-4	2	1
3.86	47	14	5	21	174	52	13	3	26	90	-4	2	1
3.87	48	13	5	21	174	52	13	3	26	90	-4	2	1
3.88	52	13	4	25	188	52	13	3	26	90	-4	2	1
3.89	56	12	2	28	196	52	13	3	26	90	-4	2	1
3.9	58	12	2	31	206	52	13	3	26	90	-4	2	1
3.91	59	12	3	30	208	52	13	3	26	90	-4	2	1
3.92	58	12	3	28	202	52	13	3	26	90	-4	2	1
3.93	56	12	2	27	194	52	13	3	26	90	-4	2	1
3.94	54	13	1	26	188	52	13	3	26	90	-4	2	1
3.95	52	14	1	25	184	52	13	3	26	90	-4	2	1
3.96	52	16	1	23	184	52	13	3	26	90	-4	2	1
3.97	52	18	2	23	190	52	13	3	26	90	-4	2	1
3.98	50	21	4	25	200	52	13	3	26	90	-4	2	1
3.99	47	22	6	26	202	52	13	3	26	90	-4	-6	1
4	47	21	5	27	200	52	13	3	26	90	-4	-6	1
4.01	49	19	4	28	200	52	13	3	26	90	-4	-6	1
4.02	50	18	5	29	204	52	13	3	26	90	-4	-6	1
4.03	51	18	8	28	210	52	13	3	26	90	-4	-6	1
4.04	51	19	7	27	208	52	13	3	26	90	-4	-6	1
4.05	49	20	5	27	202	52	13	3	26	90	-4	-6	1
4.06	48	18	5	28	198	52	13	3	26	90	-4	-6	1
4.07	53	14	5	26	196	52	13	3	26	90	-4	5	1
4.08	59	12	5	25	202	52	13	3	26	90	-4	5	1
4.09	59	12	5	27	206	52	13	3	26	90	-4	5	1
4.1	57	12	5	29	206	52	13	3	26	90	-4	5	1
4.11	53	12	5	27	194	52	13	3	26	90	-4	5	1
4.12	49	14	5	21	178	52	13	3	26	90	-4	5	1
4.13	48	16	5	20	178	52	13	3	26	90	-4	5	1
4.14	50	14	5	25	188	52	13	3	26	90	-4	5	1
4.15	52	11	4	28	190	52	13	3	26	90	-4	5	1
4.16	51	8	3	27	178	52	13	3	26	90	-4	5	1
4.17	46	8	3	26	166	52	13	3	26	90	-4	5	1
4.18	43	10	2	27	164	52	13	3	26	90	-4	5	1
4.19	44	12	2	29	174	52	13	3	26	90	-4	5	1
4.2	48	12	2	31	186	52	13	3	26	90	-4	5	1
4.21	51	11	2	28	184	52	13	3	26	90	-4	5	1
4.22	53	11	4	25	186	52	13	3	26	90	-4	5	1
4.23	54	13	5	26	196	52	13	3	26	90	-4	5	1
4.24	54	13	4	27	196	52	13	3	26	90	-4	5	1
4.25	55	12	2	27	192	52	13	3	26	90	-4	3	1
4.26	54	12	1	28	190	52	13	3	26	90	-4	3	1
4.27	51	12	1	28	184	52	13	3	26	90	-4	3	1
4.28	49	12	1	27	178	52	13	3	26	90	-4	3	1
4.29	50	10	1	24	170	52	13	3	26	90	-4	3	1
4.3	53	8	0	22	166	52	13	3	26	90	-4	3	1
4.31	56	9	1	20	172	52	13	3	26	90	-4	3	1
4.32	56	11	1	20	176	52	13	3	26	90	-4	3	1
4.33	54	15	2	20	182	52	13	3	26	90	-4	3	1
4.34	48	18	4	18	176	52	13	3	26	90	-4	3	1
4.35	41	19	6	15	162	32	20	6	14	68	11	24	2
4.36	37	21	7	14	158	32	20	6	14	68	11	24	2
4.37	35	21	7	16	158	32	20	6	14	68	11	24	2
4.38	29	20	6	15	140	32	20	6	14	68	11	24	2
4.39	26	19	5	13	126	32	20	6	14	68	11	24	2
4.4	28	18	6	12	128	32	20	6	14	68	11	24	2
4.41	32	18	8	11	138	32	20	6	14	68	11	24	2
4.42	33	22	10	10	150	32	20	6	14	68	11	24	2
4.43	31	28	11	8	156	38	28	7	9	90	22	29	3
4.44	30	32	11	7	160	38	28	7	9	90	22	29	3
4.45	32	33	10	6	162	38	28	7	9	90	22	29	3
4.46	37	31	8	8	168	38	28	7	9	90	22	29	3
4.47	41	27	6	10	168	38	28	7	9	90	22	20	3
4.48	40	27	6	10	166	38	28	7	9	90	22	20	3
4.49	40	27	6	10	166	38	28	7	9	90	22	15	3
4.5	46	22	5	15	176	38	28	7	9	90	22	15	3
4.51	47	18	4	22	182	46	18	4	24	81	-1	-8	1
4.52	46	18	4	25	186	46	18	4	24	81	-1	-8	1
4.53	46	17	4	25	184	46	18	4	24	81	-1	-8	1
4.54	43	17	4	22	172	46	18	4	24	81	-1	-8	1
4.55	39	17	4	17	154	39	19	5	12	78	10	16	2
4.56	39	19	5	12	150	39	19	5	12	78	10	16	2
4.57	35	22	5	8	140	39	19	5	12	78	10	16	2
4.58	27	24	5	6	124	26	24	6	6	90	25	27	3
4.59	24	24	6	6	120	26	24	6	6	90	25	27	3
4.6	29	23	5	10	134	43	21	4	15	90	9	11	1
4.61	37	20	4	15	152	43	21	4	15	90	9	11	1
4.62	43	18	4	19	168	43	21	4	15	90	9	11	1
4.63	44	21	3	18	172	43	21	4	15	90	9	11	1
4.64	43	25	3	14	170	43	21	4	15	90	9	11	1
4.65	38	25	3	11	154	32	23	5	10	79	19	18	3
4.66	31	23	4	11	138	32	23	5	10	79	19	18	3
4.67	28	23	5	9	130	32	23	5	10	79	19	23	3
4.68	32	24	7	7	140	32	23	5	10	79	19	23	3
4.69	37	23	8	10	156	32	23	5	10	79	19	23	3
4.7	42	19	8	16	170	45	16	7	18	68	1	21	2
4.71	48	14	5	20	174	45	16	7	18	68	1	21	2
4.72	48	14	6	21	178	45	16	7	18	68	1	21	2
4.73	42	18	10	17	174	45	16	7	18	68	1	21	2
4.74	35	22	13	12	164	34	22	10	9	64	21	33	4
4.75	33	22	12	8	150	34	22	10	9	64	21	33	4
4.76	32	20	9	7	136	34	22	10	9	64	21	33	4
4.77	33	22	9	6	140	34	22	10	9	64	21	33	4
4.78	36	27	10	5	156	34	22	10	9	64	21	33	4
4.79	40	27	11	5	166	34	22	10	9	64	21	33	4
4.8	41	25	11	5	164	34	22	10	9	64	21	33	4
4.81	40	23	11	8	164	34	22	10	9	64	21	33	4
4.82	41	21	8	12	164	34	22	10	9	64	21	25	4
4.83	40	20	6	11	154	34	22	10	9	64	21	25	4
4.84	38	20	8	9	150	34	22	10	9	64	21	25	4
4.85	34	19	10	7	140	34	22	10	9	64	21	24	4
4.86	31	19	12	8	140	34	22	10	9	64	21	24	4
4.87	34	23	11	10	156	34	22	10	9	64	21	24	4
4.88	39	24	9	12	168	34	22	10	9	64	21	24	4
4.89	36	21	8	12	154	34	22	10	9	64	21	24	4
4.9	30	22	8	12	144	34	22	10	9	64	21	36	4
4.91	26	26	10	11	146	34	22	10	9	64	21	36	4
4.92	25	28	10	10	146	34	22	10	9	64	21	36	4
4.93	26	26	11	9	144	34	22	10	9	64	21	36	4
4.94	26	23	11	7	134	34	22	10	9	64	21	36	4
4.95	25	24	11	4	128	28	24	9	6	78	26	33	3
4.96	28	27	11	2	136	28	24	9	6	78	26	33	3
4.97	33	30	11	4	156	28	24	9	6	78	26	30	3
4.98	33	30	10	5	156	28	24	9	6	78	26	30	3
4.99	30	28	9	4	142	28	24	9	6	78	26	30	3
5	29	25	8	3	130	28	24	9	6	78	26	30	3
5.01	30	24	6	3	126	28	24	9	6	78	26	30	3
5.02	29	24	6	5	128	28	24	9	6	78	26	30	3
5.03	29	24	6	8	134	28	24	9	6	78	26	30	3
5.04	29	23	7	8	134	28	24	9	6	78	26	30	3
5.05	28	23	9	7	134	28	24	9	6	78	26	30	3
5.06	24	22	10	6	124	28	24	9	6	78	26	30	3
5.07	22	21	10	7	120	28	24	9	6	78	26	30	3
5.08	22	21	10	6	118	28	24	9	6	78	26	30	3
5.09	23	21	9	6	118	28	24	9	6	78	26	30	3
5.1	24	23	10	7	128	28	24	9	6	78	26	30	3
5.11	26	24	9	11	140	28	24	9	6	78	26	30	3
5.12	27	26	8	15	152	30	25	9	10	70	22	34	4
5.13	27	29	7	16	158	30	25	9	10	70	22	34	4
5.14	30	29	7	13	158	30	25	9	10	70	22	34	4
5.15	35	25	8	10	156	30	25	9	10	70	22	29	4
5.16	39	23	9	9	160	30	25	9	10	70	22	29	4
5.17	35	25	11	8	158	30	25	9	10	70	22	29	4
5.18	29	29	11	8	154	30	25	9	10	70	22	29	4
5.19	26	32	10	9	154	30	25	9	10	70	22	29	4
5.2	26	28	8	10	144	30	25	9	10	70	22	29	4
5.21	28	24	9	10	142	30	25	9	10	70	22	29	4
5.22	30	21	10	10	142	30	25	9	10	70	22	29	4
5.23	32	19	11	11	146	30	25	9	10	70	22	29	4
5.24	36	18	12	12	156	30	25	9	10	70	22	29	4
5.25	41	19	12	14	172	41	19	10	13	74	10	18	2
5.26	41	19	9	12	162	41	19	10	13	74	10	18	2
5.27	39	21	6	10	152	26	23	8	6	90	30	17	3
5.28	39	24	5	9	154	26	23	8	6	90	30	17	3
5.29	42	25	6	10	166	26	23	8	6	90	30	17	3
5.3	42	23	6	10	162	26	23	8	6	90	30	19	3
5.31	36	21	6	9	144	26	23	8	6	90	30	19	3
5.32	27	22	7	6	124	26	23	8	6	90	30	31	3
5.33	21	23	7	4	110	26	23	8	6	90	30	31	3
5.34	21	23	7	3	108	26	23	8	6	90	30	31	3
5.35	23	23	9	3	116	26	23	8	6	90	30	31	3
5.36	24	25	10	4	126	26	23	8	6	90	30	31	3
5.37	26	27	10	5	136	26	23	8	6	90	30	31	3
5.38	27	31	9	5	144	26	23	8	6	90	30	31	3
5.39	27	33	10	6	152	26	23	8	6	90	30	31	3
5.4	26	30	10	7	146	26	23	8	6	90	30	31	3
5.41	24	25	10	7	132	26	23	8	6	90	30	31	3
5.42	23	23	9	5	120	26	23	8	6	90	30	31	3
5.43	24	23	8	4	118	26	23	8	6	90	30	31	3
5.44	25	21	6	7	118	26	23	8	6	90	30	31	3
5.45	25	21	5	11	124	24	22	6	11	67	19	30	4
5.46	23	22	6	11	124	24	22	6	11	67	19	30	4
5.47	20	25	8	8	122	29	26	9	7	82	26	29	3
5.48	20	25	10	7	124	29	26	9	7	82	26	29	3
5.49	25	22	10	7	128	29	26	9	7	82	26	29	3
5.5	29	18	9	7	126	29	26	9	7	82	26	29	3
5.51	33	18	8	8	134	29	26	9	7	82	26	29	3
5.52	34	24	8	9	150	29	26	9	7	82	26	29	3
5.53	28	30	8	8	148	29	26	9	7	82	26	29	3
5.54	25	32	8	8	146	29	26	9	7	82	26	29	3
5.55	27	28	9	8	144	29	26	9	7	82	26	29	3
5.56	29	25	10	7	142	29	26	9	7	82	26	29	3
5.57	29	25	8	6	136	29	26	9	7	82	26	29	3
5.58	30	25	5	6	132	29	26	9	7	82	26	29	3
5.59	31	23	5	6	130	29	26	9	7	82	26	29	3
5.6	32	22	8	6	136	29	26	9	7	82	26	29	3
5.61	33	22	11	5	142	29	26	9	7	82	26	29	3
5.62	33	24	12	4	146	29	26	9	7	82	26	29	3
5.63	35	25	11	4	150	29	26	9	7	82	26	29	3
5.64	34	27	9	6	152	29	26	9	7	82	26	29	3
5.65	29	28	8	6	142	29	26	9	7	82	26	29	3
5.66	26	27	9	6	136	29	26	9	7	82	26	29	3
5.67	29	28	10	9	152	29	26	9	7	82	26	29	3
5.68	29	30	10	11	160	29	26	9	7	82	26	29	3
5.69	23	32	10	10	150	29	26	9	7	82	26	29	3
5.7	19	32	10	8	138	29	26	9	7	82	26	29	3
5.71	20	31	9	7	134	29	26	9	7	82	26	29	3
5.72	22	28	8	6	128	29	26	9	7	82	26	29	3
5.73	26	24	7	6	126	29	26	9	7	82	26	29	3
5.74	30	23	6	6	130	29	26	9	7	82	26	29	3
5.75	32	29	6	6	146	29	26	9	7	82	26	29	3
5.76	33	33	7	5	156	29	26	9	7	82	26	29	3
5.77	32	31	8	3	148	29	26	9	7	82	26	29	3
5.78	30	26	9	4	138	29	26	9	7	82	26	29	3
5.79	31	22	10	6	138	29	26	9	7	82	26	29	3
5.8	35	22	11	9	154	29	26	9	7	82	26	29	3
5.81	36	25	12	11	168	29	26	9	7	82	26	29	3
5.82	32	26	11	11	160	29	26	9	7	82	26	29	3
5.83	27	26	8	11	144	29	26	9	7	82	26	29	3
5.84	26	25	6	10	134	29	26	9	7	82	26	29	3
5.85	26	25	6	7	128	29	26	9	7	82	26	29	3
5.86	25	26	8	5	128	29	26	9	7	82	26	29	3
5.87	26	27	9	5	134	29	26	9	7	82	26	29	3
5.88	26	27	9	5	134	29	26	9	7	82	26	29	3
5.89	26	27	9	7	138	29	26	9	7	82	26	29	3
5.9	27	27	10	9	146	27	24	11	6	74	28	32	4
5.91	29	25	11	8	146	27	24	11	6	74	28	32	4
5.92	28	25	11	6	140	27	24	11	6	74	28	32	4
5.93	28	25	12	5	140	27	24	11	6	74	28	32	4
5.94	27	24	11	5	134	27	24	11	6	74	28	32	4
5.95	26	24	11	5	132	27	24	11	6	74	28	32	4
5.96	27	24	13	4	136	27	24	11	6	74	28	32	4
5.97	28	24	14	5	142	27	24	11	6	74	28	32	4
5.98	29	24	13	7	146	27	24	11	6	74	28	32	4
5.99	29	24	10	9	144	27	24	11	6	74	28	32	4
6	26	23	8	8	130	27	24	11	6	74	28	32	4
6.01	23	22	7	8	120	27	24	11	6	74	28	32	4
6.02	21	24	8	7	120	27	24	11	6	74	28	32	4
6.03	23	25	10	6	128	27	24	11	6	74	28	32	4
6.04	25	25	10	6	132	27	24	11	6	74	28	32	4
6.05	26	23	9	7	130	27	24	11	6	74	28	32	4
6.06	25	22	9	7	126	27	24	11	6	74	28	32	4
6.07	22	20	11	8	122	27	24	11	6	74	28	32	4
6.08	22	19	11	7	118	27	24	11	6	74	28	32	4
6.09	24	19	11	5	118	27	24	11	6	74	28	32	4
6.1	25	21	12	4	124	27	24	11	6	74	28	32	4
6.11	27	23	11	4	130	27	24	11	6	74	28	32	4
6.12	27	25	10	3	130	27	24	11	6	74	28	32	4
6.13	25	25	11	2	126	27	24	11	6	74	28	32	4
6.14	26	25	13	2	132	27	24	11	6	74	28	32	4
6.15	29	25	15	3	144	27	24	11	6	74	28	32	4
6.16	32	23	13	5	146	27	24	11	6	74	28	32	4
6.17	34	22	10	8	148	27	24	11	6	74	28	32	4
6.18	35	22	10	9	152	27	24	11	6	74	28	32	4
6.19	33	23	11	10	154	27	24	11	6	74	28	32	4
6.2	30	23	11	10	148	27	24	11	6	74	28	32	4
6.21	28	24	12	10	148	27	24	11	6	74	28	32	4
6.22	30	24	12	8	148	27	24	11	6	74	28	32	4
6.23	32	26	12	6	152	27	24	11	6	74	28	32	4
6.24	27	27	12	6	144	27	24	11	6	74	28	32	4
6.25	22	26	11	6	130	27	24	11	6	74	28	32	4
6.26	23	24	11	5	126	27	24	11	6	74	28	32	4
6.27	25	21	10	5	122	27	24	11	6	74	28	32	4
6.28	24	21	10	6	122	27	24	11	6	74	28	32	4
6.29	21	21	10	8	120	27	24	11	6	74	28	32	4
6.3	21	22	10	9	124	27	24	11	6	74	28	32	4
6.31	21	26	8	7	124	31	22	8	8	79	19	32	3
6.32	23	31	6	6	132	31	22	8	8	79	19	32	3
6.33	25	30	6	6	134	31	22	8	8	79	19	32	3
6.34	29	24	6	6	130	31	22	8	8	79	19	22	3
6.35	32	21	7	6	132	31	22	8	8	79	19	22	3
6.36	30	22	9	8	138	31	22	8	8	79	19	22	3
6.37	28	22	10	10	140	31	22	8	8	79	19	22	3
6.38	28	19	10	11	136	31	22	8	8	79	19	22	3
6.39	31	19	10	11	142	31	22	8	8	79	19	22	3
6.4	32	21	9	12	148	31	22	8	8	79	19	22	3
6.41	33	23	9	14	158	31	22	8	8	79	19	22	3
6.42	34	22	9	14	158	31	22	8	8	79	19	22	3
6.43	36	21	9	13	158	31	22	8	8	79	19	22	3
6.44	34	20	11	10	150	31	22	8	8	79	19	22	3
6.45	28	22	12	6	136	31	22	8	8	79	19	22	3
6.46	23	24	10	8	130	31	22	8	8	79	19	22	3
6.47	24	25	7	12	136	31	22	8	8	79	19	22	3
6.48	28	24	5	13	140	31	22	8	8	79	19	22	3
6.49	30	24	4	11	138	31	22	8	8	79	19	22	3
6.5	32	23	5	7	134	31	22	8	8	79	19	22	3
6.51	32	19	6	5	124	31	22	8	8	79	19	22	3
6.52	33	17	6	4	120	31	22	8	8	79	19	22	3
6.53	35	20	7	5	134	31	22	8	8	79	19	22	3
6.54	37	23	8	7	150	31	22	8	8	79	19	22	3
6.55	37	22	7	8	148	31	22	8	8	79	19	22	3
6.56	34	19	7	9	138	31	22	8	8	79	19	22	3
6.57	30	18	8	8	128	31	22	8	8	79	19	22	3
6.58	28	20	12	7	134	34	23	12	7	69	23	31	4
6.59	30	23	14	7	148	34	23	12	7	69	23	31	4
6.6	32	23	15	10	160	34	23	12	7	69	23	31	4
6.61	34	20	14	10	156	34	23	12	7	69	23	31	4
6.62	34	21	12	8	150	34	23	12	7	69	23	31	4
6.63	34	25	10	7	152	34	23	12	7	69	23	31	4
6.64	34	27	10	7	156	34	23	12	7	69	23	31	4
6.65	32	25	9	5	142	30	26	8	5	90	26	28	3
6.66	30	24	8	4	132	30	26	8	5	90	26	28	3
6.67	31	25	7	5	136	30	26	8	5	90	26	28	3
6.68	34	25	7	6	144	30	26	8	5	90	26	28	3
6.69	32	26	7	6	142	30	26	8	5	90	26	28	3
6.7	29	27	6	6	136	30	26	8	5	90	26	28	3
6.71	26	28	4	5	126	30	26	8	5	90	26	28	3
6.72	23	27	6	3	118	30	26	8	5	90	26	28	3
6.73	22	26	9	3	120	30	26	8	5	90	26	28	3
6.74	24	26	11	5	132	30	26	8	5	90	26	28	3
6.75	28	25	9	6	136	30	26	8	5	90	26	28	3
6.76	34	25	5	7	142	30	26	8	5	90	26	28	3
6.77	36	27	4	7	148	30	26	8	5	90	26	28	3
6.78	36	27	5	7	150	30	26	8	5	90	26	28	3
6.79	35	26	7	7	150	30	26	8	5	90	26	28	3
6.8	30	26	8	6	140	30	26	8	5	90	26	28	3
6.81	25	28	8	5	132	30	26	8	5	90	26	28	3
6.82	24	30	9	5	136	30	26	8	5	90	26	28	3
6.83	24	30	10	5	138	30	26	8	5	90	26	28	3
6.84	21	27	9	5	124	30	26	8	5	90	26	28	3
6.85	22	23	8	5	116	30	26	8	5	90	26	28	3
6.86	27	21	7	5	120	30	26	8	5	90	26	28	3
6.87	35	21	9	4	138	30	26	8	5	90	26	28	3
6.88	37	23	11	3	148	30	26	8	5	90	26	31	3
6.89	31	27	12	2	144	30	26	8	5	90	26	31	3
6.9	24	28	10	4	132	30	26	8	5	90	26	31	3
6.91	23	26	8	9	132	24	26	8	10	65	26	36	4
6.92	26	25	9	12	144	24	26	8	10	65	26	36	4
6.93	32	26	11	9	156	30	26	10	7	77	25	29	3
6.94	37	27	10	5	158	30	26	10	7	77	25	29	3
6.95	39	27	8	5	158	30	26	10	7	77	25	29	3
6.96	38	28	8	7	162	30	26	10	7	77	25	29	3
6.97	36	30	9	8	166	30	26	10	7	77	25	29	3
6.98	33	32	10	7	164	30	26	10	7	77	25	29	3
6.99	31	32	10	5	156	30	26	10	7	77	25	29	3
7	29	31	10	7	154	30	26	10	7	77	25	29	3
7.01	29	30	10	8	154	30	26	10	7	77	25	29	3
7.02	30	27	11	7	150	30	26	10	7	77	25	29	3
7.03	31	25	13	6	150	30	26	10	7	77	25	29	3
7.04	30	26	13	5	148	30	26	10	7	77	25	29	3
7.05	28	28	10	6	144	30	26	10	7	77	25	29	3
7.06	28	29	7	6	140	30	26	10	7	77	25	29	3
7.07	30	25	7	5	134	30	26	10	7	77	25	29	3
7.08	30	21	7	5	126	30	26	10	7	77	25	29	3
7.09	28	21	8	6	126	30	26	10	7	77	25	29	3
7.1	26	23	10	7	132	30	26	10	7	77	25	29	3
7.11	28	26	13	8	150	30	26	10	7	77	25	29	3
7.12	32	25	12	8	154	30	26	10	7	77	25	29	3
7.13	30	22	10	7	138	30	26	10	7	77	25	29	3
7.14	27	23	7	6	126	30	26	10	7	77	25	29	3
7.15	27	27	6	7	134	30	26	10	7	77	25	29	3
7.16	30	27	7	8	144	30	26	10	7	77	25	29	3
7.17	32	25	8	8	146	30	26	10	7	77	25	29	3
7.18	30	23	9	6	136	30	26	10	7	77	25	29	3
7.19	29	22	9	7	134	30	26	10	7	77	25	29	3
