# Supplementary material for: Tracking multiple conformations occurring on angstrom-and-millisecond scales in single amino-acid-transporter molecules
Source: eLife. 2023 Feb 17;12:e82175. doi: 10.7554/eLife.82175 (PMC9937647; doi:10.7554/eLife.82175)
Supplement: Figure 3—source data 2. [file elife-82175-fig3-data2.xlsx]

## Sheet: Arg Angle and intensity trace 0
Angle and intensity trace for [arg]=0.75 mM traces
time (sec)	I0	I45	I90	I135	theta-L	phi-L	Itot	I0	I45	I90	I135	Omega	state number
0	30	9	0	19	79	179	116	35	15	3	19	51	4
0.01	30	11	2	19	79	179	124	35	15	3	19	51	4
0.02	30	12	2	21	79	179	130	35	15	3	19	51	4
0.03	37	14	1	22	79	179	148	35	15	3	19	51	4
0.04	36	15	1	20	79	179	144	35	15	3	19	51	4
0.05	35	17	2	19	79	179	146	35	15	3	19	51	4
0.06	32	16	3	18	79	179	138	35	15	3	19	51	4
0.07	30	14	3	17	79	179	128	35	15	3	19	51	4
0.08	28	13	3	16	79	179	120	35	15	3	19	51	4
0.09	26	14	3	14	79	179	114	35	15	3	19	51	4
0.1	26	17	3	13	79	179	118	35	15	3	19	51	4
0.11	26	16	3	14	79	179	118	35	15	3	19	51	4
0.12	29	14	3	16	79	179	124	35	15	3	19	51	4
0.13	36	13	2	15	79	179	132	35	15	3	19	51	4
0.14	39	15	3	15	79	179	144	35	15	3	19	51	4
0.15	37	16	4	16	79	179	146	35	15	3	19	51	4
0.16	32	17	3	17	79	179	138	35	15	3	19	51	4
0.17	31	16	3	17	79	179	134	35	15	3	19	51	4
0.18	32	17	4	18	79	179	142	35	15	3	19	51	4
0.19	35	18	3	19	79	179	150	35	15	3	19	51	4
0.2	37	17	2	19	79	179	150	35	15	3	19	51	4
0.21	35	15	1	20	79	179	142	35	15	3	19	51	4
0.22	32	15	2	22	79	179	142	35	15	3	19	51	4
0.23	31	17	3	23	79	179	148	35	15	3	19	51	4
0.24	33	17	5	23	79	179	156	35	15	3	19	51	4
0.25	32	14	7	22	79	179	150	35	15	3	19	51	4
0.26	30	12	9	22	79	179	146	35	15	3	19	51	4
0.27	31	12	9	21	79	179	146	35	15	3	19	51	4
0.28	35	14	6	20	79	179	150	35	15	3	19	51	4
0.29	36	15	3	20	79	179	148	35	15	3	19	51	4
0.3	36	13	2	20	79	179	142	35	15	3	19	51	4
0.31	36	12	2	19	79	179	138	35	15	3	19	51	4
0.32	38	12	3	17	79	179	140	35	15	3	19	51	4
0.33	39	13	4	15	79	179	142	35	15	3	19	51	4
0.34	38	14	2	13	79	179	134	35	15	3	19	51	4
0.35	36	15	1	13	79	179	130	35	15	3	19	51	4
0.36	36	15	0	15	79	179	132	35	15	3	19	51	4
0.37	37	15	0	19	79	179	142	35	15	3	19	51	4
0.38	36	15	0	20	79	179	142	35	15	3	19	51	4
0.39	35	14	1	17	79	179	134	35	15	3	19	51	4
0.4	34	16	1	16	79	179	134	35	15	3	19	51	4
0.41	36	17	2	19	79	179	148	35	15	3	19	51	4
0.42	35	14	4	21	79	179	148	35	15	3	19	51	4
0.43	32	12	6	22	79	179	144	35	15	3	19	51	4
0.44	32	14	7	21	79	179	148	35	15	3	19	51	4
0.45	35	17	5	20	79	179	154	35	15	3	19	51	4
0.46	37	16	4	20	79	179	154	35	15	3	19	51	4
0.47	35	15	5	19	79	179	148	35	15	3	19	51	4
0.48	29	13	7	19	54	171	136	26	12	8	19	31	3
0.49	26	13	8	19	54	171	132	26	12	8	19	31	3
0.5	26	12	8	20	54	171	132	26	12	8	19	31	3
0.51	24	10	7	19	54	171	120	26	12	8	19	31	3
0.52	19	9	6	17	64	160	102	25	7	8	20	27	2
0.53	16	8	7	16	64	160	94	25	7	8	20	27	2
0.54	18	7	8	16	64	160	98	25	7	8	20	27	2
0.55	21	5	8	19	64	160	106	25	7	8	20	27	2
0.56	24	5	9	20	64	160	116	25	7	8	20	27	2
0.57	26	6	8	20	64	160	120	25	7	8	20	27	2
0.58	27	6	8	19	64	160	120	25	7	8	20	27	2
0.59	29	6	7	20	64	160	124	25	7	8	20	27	2
0.6	33	8	5	21	64	160	134	25	7	8	20	27	2
0.61	35	10	5	20	64	160	140	25	7	8	20	27	2
0.62	31	11	7	20	64	160	138	25	7	8	20	27	2
0.63	26	9	10	22	64	160	134	25	7	8	20	27	2
0.64	23	7	10	22	64	160	124	25	7	8	20	27	2
0.65	24	4	9	23	64	160	120	25	7	8	20	27	2
0.66	27	3	9	26	64	160	130	25	7	8	20	27	2
0.67	28	3	10	29	64	160	140	25	7	8	20	27	2
0.68	27	4	10	28	64	160	138	25	7	8	20	27	2
0.69	24	7	8	26	64	160	130	25	7	8	20	27	2
0.7	23	8	8	25	64	160	128	25	7	8	20	27	2
0.71	23	8	9	24	64	160	128	25	7	8	20	27	2
0.72	20	9	8	22	64	160	118	25	7	8	20	27	2
0.73	20	10	7	20	64	160	114	25	7	8	20	27	2
0.74	22	11	8	18	64	160	118	25	7	8	20	27	2
0.75	26	9	9	18	64	160	124	25	7	8	20	27	2
0.76	29	7	9	17	64	160	124	25	7	8	20	27	2
0.77	30	7	9	17	64	160	126	25	7	8	20	27	2
0.78	31	11	7	15	67	185	128	35	16	5	14	48	3
0.79	33	14	5	13	67	185	130	35	16	5	14	48	3
0.8	37	18	5	12	67	185	144	35	16	5	14	48	3
0.81	39	19	4	15	67	185	154	35	16	5	14	48	3
0.82	40	15	3	21	86	174	158	39	14	4	23	52	4
0.83	38	12	4	25	86	174	158	39	14	4	23	52	4
0.84	36	13	4	23	69	178	152	31	16	4	19	43	3
0.85	33	16	5	21	69	178	150	31	16	4	19	43	3
0.86	31	19	4	19	69	178	146	31	16	4	19	43	3
0.87	31	20	4	17	58	185	144	31	16	4	19	44	3
0.88	26	16	8	17	58	185	134	31	16	4	19	44	3
0.89	16	11	14	18	32	142	118	6	8	14	16	-20	1
0.9	8	7	17	18	63	117	100	6	8	14	16	17	1
0.91	6	6	18	16	63	117	92	6	8	14	16	17	1
0.92	4	7	17	14	50	114	84	6	8	14	16	-14	1
0.93	3	9	15	14	50	114	82	6	8	14	16	-14	1
0.94	3	10	12	15	50	114	80	6	8	14	16	-14	1
0.95	6	9	11	15	50	114	82	6	8	14	16	-14	1
0.96	11	8	11	16	50	114	92	6	8	14	16	-14	1
0.97	14	7	12	19	60	144	104	22	8	9	26	14	2
0.98	17	5	12	21	60	144	110	22	8	9	26	14	2
0.99	20	5	10	24	60	144	118	22	8	9	26	14	2
1	24	9	8	28	59	160	138	22	8	9	26	24	2
1.01	27	14	6	29	59	160	152	22	8	9	26	24	2
1.02	26	16	8	27	59	160	154	22	8	9	26	24	2
1.03	22	13	11	23	42	150	138	18	12	12	23	-16	1
1.04	18	12	12	22	42	150	128	18	12	12	23	-16	1
1.05	16	11	13	24	42	150	128	18	12	12	23	-16	1
1.06	19	9	12	26	64	148	132	19	6	10	24	19	2
1.07	21	7	10	27	64	148	130	19	6	10	24	19	2
1.08	19	6	9	26	64	148	120	19	6	10	24	19	2
1.09	16	6	10	25	64	148	114	19	6	10	24	19	2
1.1	15	4	12	24	64	148	110	19	6	10	24	19	2
1.11	18	3	13	22	64	148	112	19	6	10	24	19	2
1.12	22	4	12	21	64	148	118	19	6	10	24	19	2
1.13	24	6	9	21	64	148	120	19	6	10	24	19	2
1.14	27	10	6	21	64	148	128	19	6	10	24	19	2
1.15	33	14	3	19	84	181	138	33	15	3	19	56	4
1.16	35	16	4	17	84	181	144	33	15	3	19	56	4
1.17	33	16	5	16	84	181	140	33	15	3	19	56	4
1.18	32	17	4	16	84	181	138	33	15	3	19	56	4
1.19	32	18	3	17	84	181	140	33	15	3	19	56	4
1.2	32	18	3	18	84	181	142	33	15	3	19	56	4
1.21	33	17	3	18	84	181	142	33	15	3	19	56	4
1.22	34	17	2	19	84	181	144	33	15	3	19	56	4
1.23	33	17	2	21	84	181	146	33	15	3	19	56	4
1.24	32	15	2	21	84	181	140	33	15	3	19	56	4
1.25	32	15	3	21	84	181	142	33	15	3	19	56	4
1.26	33	15	4	18	84	181	140	33	15	3	19	56	4
1.27	34	16	3	17	84	181	140	33	15	3	19	56	4
1.28	31	17	4	19	84	181	142	33	15	3	19	56	4
1.29	31	17	4	23	84	181	150	33	15	3	19	56	4
1.3	33	17	4	24	84	181	156	33	15	3	19	56	4
1.31	35	19	3	23	84	181	160	33	15	3	19	56	4
1.32	36	19	3	21	84	181	158	33	15	3	19	56	4
1.33	38	18	2	18	84	181	152	33	15	3	19	56	4
1.34	40	17	1	15	84	181	146	33	15	3	19	56	4
1.35	41	15	2	13	84	181	142	33	15	3	19	56	4
1.36	40	15	3	14	84	181	144	33	15	3	19	56	4
1.37	40	17	3	17	84	181	154	33	15	3	19	56	4
1.38	38	19	3	18	84	181	156	33	15	3	19	56	4
1.39	34	21	3	17	84	181	150	33	15	3	19	56	4
1.4	31	18	3	16	84	181	136	33	15	3	19	56	4
1.41	31	13	3	17	84	181	128	33	15	3	19	56	4
1.42	32	9	3	19	84	181	126	33	15	3	19	56	4
1.43	35	9	2	21	84	181	134	33	15	3	19	56	4
1.44	39	11	2	21	84	181	146	33	15	3	19	56	4
1.45	42	12	2	19	84	181	150	33	15	3	19	56	4
1.46	39	14	3	19	84	181	150	33	15	3	19	56	4
1.47	34	16	2	20	84	181	144	33	15	3	19	56	4
1.48	33	20	1	19	84	181	146	33	15	3	19	56	4
1.49	37	22	2	17	84	181	156	33	15	3	19	56	4
1.5	39	20	2	15	84	181	152	33	15	3	19	56	4
1.51	33	16	3	15	78	174	134	33	15	3	19	46	4
1.52	30	13	4	15	78	174	124	33	15	3	19	46	4
1.53	30	13	4	16	78	174	126	33	15	3	19	46	4
1.54	29	13	6	18	78	174	132	33	15	3	19	46	4
1.55	26	12	6	19	78	174	126	33	15	3	19	46	4
1.56	24	12	5	20	78	174	122	33	15	3	19	46	4
1.57	25	11	2	18	78	174	112	33	15	3	19	46	4
1.58	30	12	1	17	78	174	120	33	15	3	19	46	4
1.59	32	13	1	18	78	174	128	33	15	3	19	46	4
1.6	31	14	2	22	78	174	138	33	15	3	19	46	4
1.61	29	13	4	25	78	174	142	33	15	3	19	46	4
1.62	30	11	5	25	78	174	142	33	15	3	19	46	4
1.63	33	10	6	23	78	174	144	33	15	3	19	46	4
1.64	37	12	6	20	78	174	150	33	15	3	19	46	4
1.65	38	11	4	18	78	174	142	33	15	3	19	46	4
1.66	35	8	3	19	78	174	130	33	15	3	19	46	4
1.67	31	6	4	20	78	174	122	33	15	3	19	46	4
1.68	27	6	5	21	78	174	118	33	15	3	19	46	4
1.69	28	7	5	23	78	174	126	33	15	3	19	46	4
1.7	33	11	4	22	78	174	140	33	15	3	19	46	4
1.71	34	14	3	20	78	174	142	33	15	3	19	46	4
1.72	31	14	3	19	78	174	134	33	15	3	19	46	4
1.73	31	14	3	21	78	174	138	33	15	3	19	46	4
1.74	34	15	2	21	78	174	144	33	15	3	19	46	4
1.75	34	15	2	20	78	174	142	33	15	3	19	46	4
1.76	33	13	4	20	78	174	140	33	15	3	19	46	4
1.77	30	10	6	20	78	174	132	33	15	3	19	46	4
1.78	23	6	9	19	59	149	114	18	6	11	23	16	2
1.79	18	5	11	18	59	149	104	18	6	11	23	16	2
1.8	15	7	11	18	59	149	102	18	6	11	23	16	2
1.81	16	9	10	20	59	149	110	18	6	11	23	16	2
1.82	18	8	9	22	59	149	114	18	6	11	23	16	2
1.83	18	6	8	22	59	149	108	18	6	11	23	16	2
1.84	17	6	10	21	59	149	108	18	6	11	23	16	2
1.85	16	7	11	23	59	149	114	18	6	11	23	16	2
1.86	15	8	11	25	59	149	118	18	6	11	23	16	2
1.87	17	8	11	24	59	149	120	18	6	11	23	16	2
1.88	18	6	11	25	59	149	120	18	6	11	23	16	2
1.89	17	5	12	26	59	149	120	18	6	11	23	16	2
1.9	17	5	12	24	59	149	116	18	6	11	23	16	2
1.91	19	6	11	20	59	149	112	18	6	11	23	16	2
1.92	22	5	11	17	59	149	110	18	6	11	23	16	2
1.93	22	3	9	20	59	149	108	18	6	11	23	16	2
1.94	23	4	8	23	59	149	116	18	6	11	23	16	2
1.95	22	5	8	23	59	149	116	18	6	11	23	16	2
1.96	21	5	10	19	59	149	110	18	6	11	23	16	2
1.97	18	6	11	16	59	149	102	18	6	11	23	16	2
1.98	16	6	11	17	59	149	100	18	6	11	23	16	2
1.99	16	7	10	19	59	149	104	18	6	11	23	16	2
2	21	6	9	19	59	149	110	18	6	11	23	16	2
2.01	27	7	9	20	59	161	126	18	6	11	23	25	2
2.02	27	9	11	22	59	161	138	18	6	11	23	25	2
2.03	25	9	14	25	65	141	146	18	6	11	23	16	2
2.04	24	8	13	25	65	141	140	18	6	11	23	16	2
2.05	22	5	13	24	65	141	128	18	6	11	23	16	2
2.06	20	4	16	25	65	141	130	18	6	11	23	16	2
2.07	18	4	18	25	65	141	130	18	6	11	23	16	2
2.08	17	5	16	25	65	141	126	18	6	11	23	16	2
2.09	17	6	15	25	65	141	126	18	6	11	23	16	2
2.1	18	6	14	26	65	141	128	18	6	11	23	16	2
2.11	19	5	13	28	65	141	130	18	6	11	23	16	2
2.12	19	4	13	28	65	141	128	18	6	11	23	16	2
2.13	16	4	14	25	65	141	118	18	6	11	23	16	2
2.14	10	4	17	20	57	122	102	8	6	16	17	10	1
2.15	6	5	18	18	57	122	94	8	6	16	17	10	1
2.16	6	7	15	16	57	122	88	8	6	16	17	10	1
2.17	11	10	11	15	57	122	94	8	6	16	17	10	1
2.18	18	14	6	14	62	189	104	20	12	4	11	49	3
2.19	23	16	3	12	62	189	108	20	12	4	11	49	3
2.2	22	15	2	10	62	189	98	20	12	4	11	49	3
2.21	18	12	3	11	55	180	88	20	12	4	11	38	3
2.22	16	10	4	14	55	180	88	20	12	4	11	38	3
2.23	19	12	6	14	47	178	102	20	12	4	11	35	3
2.24	22	15	6	10	71	195	106	20	12	4	11	58	3
2.25	21	16	4	7	71	195	96	20	12	4	11	58	3
2.26	19	14	3	6	71	195	84	20	12	4	11	58	3
2.27	19	12	4	9	71	195	88	20	12	4	11	58	3
2.28	20	9	6	11	57	178	92	20	12	4	11	38	3
2.29	22	9	6	11	57	178	96	20	12	4	11	38	3
2.3	20	8	6	11	57	178	90	20	12	4	11	38	3
2.31	17	6	9	12	41	152	88	10	6	12	15	-18	1
2.32	15	6	13	14	41	152	96	10	6	12	15	-18	1
2.33	12	4	17	15	63	126	96	10	6	12	15	12	1
2.34	11	3	17	17	63	126	96	10	6	12	15	12	1
2.35	11	5	16	18	52	139	100	10	6	12	15	6	1
2.36	11	7	15	16	52	139	98	10	6	12	15	6	1
2.37	10	9	15	14	52	139	96	10	6	12	15	6	1
2.38	10	10	13	15	52	139	96	10	6	12	15	6	1
2.39	12	9	11	18	52	139	100	10	6	12	15	6	1
2.4	14	6	9	20	52	139	98	10	6	12	15	6	1
2.41	14	4	9	21	52	139	96	10	6	12	15	6	1
2.42	14	5	9	20	52	139	96	10	6	12	15	6	1
2.43	15	7	9	20	52	139	102	10	6	12	15	6	1
2.44	14	8	8	22	52	139	104	10	6	12	15	6	1
2.45	13	7	9	23	52	139	104	10	6	12	15	6	1
2.46	15	6	10	20	52	139	102	10	6	12	15	6	1
2.47	17	6	10	16	52	139	98	10	6	12	15	6	1
2.48	17	6	10	14	52	139	94	10	6	12	15	6	1
2.49	13	6	11	13	52	139	86	10	6	12	15	6	1
2.5	9	4	12	14	52	139	78	10	6	12	15	6	1
2.51	8	3	12	14	52	139	74	10	6	12	15	6	1
2.52	9	3	11	16	52	139	78	10	6	12	15	6	1
2.53	10	5	11	20	52	139	92	10	6	12	15	6	1
2.54	11	7	12	24	52	139	108	10	6	12	15	6	1
2.55	13	7	13	23	52	139	112	10	6	12	15	6	1
2.56	15	5	13	22	52	139	110	10	6	12	15	6	1
2.57	16	5	12	21	52	139	108	10	6	12	15	6	1
2.58	16	7	11	17	52	139	102	10	6	12	15	6	1
2.59	16	8	10	15	52	139	98	10	6	12	15	6	1
2.6	13	6	9	15	52	139	86	10	6	12	15	6	1
2.61	10	4	11	16	58	129	82	10	6	12	15	7	1
2.62	9	3	12	15	58	129	78	10	6	12	15	7	1
2.63	9	4	12	15	58	129	80	10	6	12	15	7	1
2.64	10	5	12	15	58	129	84	10	6	12	15	7	1
2.65	11	4	12	15	58	129	84	10	6	12	15	7	1
2.66	11	4	12	15	58	129	84	10	6	12	15	7	1
2.67	9	4	12	13	58	129	76	10	6	12	15	7	1
2.68	7	4	14	13	58	129	76	10	6	12	15	7	1
2.69	8	4	15	15	58	129	84	10	6	12	15	7	1
2.7	10	6	13	16	58	129	90	10	6	12	15	7	1
2.71	9	8	11	16	47	131	88	10	6	12	15	-4	1
2.72	9	8	11	16	47	131	88	10	6	12	15	-4	1
2.73	9	5	10	15	47	131	78	10	6	12	15	-4	1
2.74	8	3	8	12	62	134	62	10	6	12	15	11	1
2.75	7	3	8	12	62	134	60	10	6	12	15	11	1
2.76	9	5	11	14	44	118	78	10	6	12	15	-12	1
2.77	10	6	13	13	44	118	84	10	6	12	15	-12	1
2.78	8	6	14	10	44	118	76	10	6	12	15	-12	1
2.79	5	7	14	10	44	118	72	10	6	12	15	-12	1
2.8	4	8	14	10	43	101	72	10	6	12	15	-23	1
2.81	4	11	13	11	43	101	78	10	6	12	15	-23	1
2.82	7	11	12	15	43	101	90	10	6	12	15	-23	1
2.83	11	8	11	20	63	152	100	22	5	12	23	21	2
2.84	17	6	10	23	63	152	112	22	5	12	23	21	2
2.85	22	6	9	24	63	152	122	22	5	12	23	21	2
2.86	24	6	7	24	63	152	122	22	5	12	23	21	2
2.87	25	5	9	24	63	152	126	22	5	12	23	21	2
2.88	24	5	12	25	63	152	132	22	5	12	23	21	2
2.89	23	6	15	27	63	152	142	22	5	12	23	21	2
2.9	23	5	15	28	63	152	142	22	5	12	23	21	2
2.91	26	5	12	27	63	152	140	22	5	12	23	21	2
2.92	27	6	11	25	63	152	138	22	5	12	23	21	2
2.93	28	8	10	23	63	152	138	22	5	12	23	21	2
2.94	27	9	10	21	63	152	134	22	5	12	23	21	2
2.95	25	8	11	23	63	152	134	22	5	12	23	21	2
2.96	24	8	11	24	63	152	134	22	5	12	23	21	2
2.97	23	7	9	22	63	152	122	22	5	12	23	21	2
2.98	22	6	8	20	63	152	112	22	5	12	23	21	2
2.99	22	4	7	19	63	152	104	22	5	12	23	21	2
3	20	3	8	21	79	146	104	22	5	12	23	30	2
3.01	20	2	10	23	79	146	110	22	5	12	23	30	2
3.02	21	1	12	23	79	146	114	22	5	12	23	30	2
3.03	18	2	13	24	79	146	114	22	5	12	23	30	2
3.04	13	4	13	23	82	134	106	22	5	12	23	30	2
3.05	13	5	12	21	82	134	102	22	5	12	23	30	2
3.06	15	4	14	22	82	134	110	22	5	12	23	30	2
3.07	16	2	15	25	82	134	116	22	5	12	23	30	2
3.08	14	1	15	27	82	134	114	22	5	12	23	30	2
3.09	11	3	15	25	82	134	108	22	5	12	23	30	2
3.1	10	4	15	21	82	134	100	22	5	12	23	30	2
3.11	11	5	14	20	82	134	100	22	5	12	23	30	2
3.12	12	7	13	24	82	134	112	22	5	12	23	30	2
3.13	10	8	14	24	56	128	112	13	8	14	16	5	1
3.14	10	8	14	18	56	128	100	13	8	14	16	5	1
3.15	13	8	14	15	36	142	100	13	8	14	16	-17	1
3.16	16	9	13	16	36	142	108	13	8	14	16	-17	1
3.17	15	8	11	16	36	142	100	13	8	14	16	-17	1
