# Supplementary material for: Tracking multiple conformations occurring on angstrom-and-millisecond scales in single amino-acid-transporter molecules
Source: eLife. 2023 Feb 17;12:e82175. doi: 10.7554/eLife.82175 (PMC9937647; doi:10.7554/eLife.82175)
Supplement: Figure 4—source data 1. [file elife-82175-fig4-data1.xlsx]

## Sheet: Sheet1
	State 1			State 2			State 3			State 4			Total
SNR (+/- 0.25)	sigma-phi	sigma-theta	N	Sigma-phi	Sigma-theta	N	Sigma-phi	Sigma-theta	N	Sigma-phi	Sigma-theta	N	Sigma-phi	Sigma-theta	N
5	3.43	4.2	1839	3.15	3.37	2540	3.51	3.2	2201	3.17	3.44	1897	3.31875	3.57318	8477
6	2.76	3.4	3037	2.85	2.85	4384	3.26	2.83	3708	2.58	3.14	3012	2.87333	3.06394	14141
7	2.49	2.78	2261	2.86	2.98	3345	2.51	2.4	2763	2.24	2.6	2220	2.53463	2.69856	10589
8	1.69	2.03	1104	2.69	2.59	1809	2.36	2.37	1529	1.88	1.95	1138	2.19067	2.24991	5580
9	1.26	1.38	397	1.81	1.58	546	1.81	1.71	487	1.48	1.53	398	1.60703	1.55449	1828
10	0.99	0.76	101	1.36	1.65	140	1.51	1.58	129	1.25	1.35	116	1.29154	1.38013	486
															41101
