# Supplementary material for: Tracking multiple conformations occurring on angstrom-and-millisecond scales in single amino-acid-transporter molecules
Source: eLife. 2023 Feb 17;12:e82175. doi: 10.7554/eLife.82175 (PMC9937647; doi:10.7554/eLife.82175)
Supplement: Figure 5—source data 1. [file elife-82175-fig5-data1.xlsx]

## Sheet: phi distributions
Phi angles for distributions, by state (s1-s4) and [Arg] = 0 - 5 mM
Arginine (mM)	0				0.002				0.005				0.01				0.02				0.05				0.1				0.2				0.5				0.75				1				3				5
	s1	s2	s3	s4	s1	s2	s3	s4	s1	s2	s3	s4	s1	s2	s3	s4	s1	s2	s3	s4	s1	s2	s3	s4	s1	s2	s3	s4	s1	s2	s3	s4	s1	s2	s3	s4	s1	s2	s3	s4	s1	s2	s3	s4	s1	s2	s3	s4	s1
	1.254	21.195	31.199	66.847	17.046	31.413	40.257	51.499	2.787	23.964	20.904	41.97	11.028	36.205	30.371	46.081	-0.842	11.526	34.669	65.033	5.529	11.36	18.669	36.904	0.135	10.407	28.524	48.833	12.978	34.796	47.622	54.522	-3.616	10.792	38.675	37.773	-1.644	14.803	16.962	25.695	17.281	16.146	47.869	49.752	12.002	12.619	-9.668	3.191	0.725
	1.254	21.195	31.199	66.847	17.046	31.413	40.257	51.499	-1.224	23.964	20.904	41.97	11.028	36.205	30.371	46.081	2.499	11.526	34.669	65.033	5.529	11.36	18.669	36.904	0.135	10.407	28.524	48.833	12.978	34.796	47.622	54.522	-3.616	10.792	38.675	37.773	-1.644	14.803	16.962	25.695	17.281	16.146	28.821	49.752	12.002	12.619	-9.668	3.191	0.725
	1.254	21.195	31.199	61.001	9.925	31.413	40.257	55.487	-1.224	14.984	20.904	41.97	11.028	36.205	30.371	46.081	2.499	15.29	34.669	65.033	5.529	11.36	18.669	36.904	0.135	10.407	28.524	48.833	12.978	34.796	47.622	54.522	-3.616	10.792	38.675	37.773	6.255	14.803	16.962	25.695	0.186	16.146	28.821	49.752	12.002	12.619	-9.668	3.191	0.725
	1.254	29.087	31.199	61.001	9.925	31.413	40.257	55.487	-1.224	14.984	20.904	57.496	11.028	36.205	30.371	46.081	2.499	15.29	34.669	65.033	5.529	11.36	18.669	36.904	0.135	10.407	28.524	48.833	-3.887	34.796	47.622	54.522	-3.616	10.792	38.675	37.773	6.255	14.803	16.962	25.695	0.186	16.146	28.821	54.516	12.002	13.851	4.208	3.191	0.725
	1.254	29.087	31.199	61.001	9.925	31.413	40.257	55.487	-1.224	14.984	20.904	57.496	-6.465	24.957	30.371	46.081	2.499	15.29	34.669	65.033	5.529	11.36	18.669	28.724	0.135	10.407	28.524	52.688	-3.887	34.796	47.622	54.522	-3.616	10.792	38.675	37.773	6.255	14.803	16.962	25.695	0.186	16.146	28.821	54.516	-16.1	13.851	4.208	3.191	0.725
	1.254	29.087	41.075	39.649	9.925	31.413	40.257	61.487	-1.224	14.984	20.904	57.496	-6.465	24.957	30.371	46.081	2.499	15.29	34.669	65.033	5.529	11.36	18.669	28.724	0.135	10.407	28.524	52.688	-3.887	34.796	47.622	54.522	-3.616	10.792	38.675	37.773	6.255	14.803	16.962	25.695	0.186	16.146	28.821	54.516	-16.1	13.851	4.208	3.191	0.725
	1.254	29.087	41.075	39.649	9.925	31.413	40.257	61.487	-1.224	14.984	20.904	42.667	-6.465	24.957	30.371	51.855	2.499	15.29	34.669	65.033	-0.938	11.36	18.669	28.724	-0.203	10.407	28.524	52.688	-14.742	34.796	47.622	54.522	-3.616	10.792	38.675	37.773	6.255	14.803	16.962	35.534	0.186	32.408	28.821	54.516	-16.1	12.951	4.208	3.191	0.725
	1.254	29.087	44.373	39.649	9.285	31.413	40.257	61.487	-0.47	14.984	20.071	42.667	-6.465	30.414	30.371	51.855	2.499	15.29	34.669	65.033	-0.938	11.36	18.669	28.724	-0.203	10.407	28.524	52.688	-14.742	34.796	47.622	54.522	-3.616	10.792	38.675	37.773	6.255	14.803	16.962	35.534	0.186	18.64	33.442	33.098	-1.225	12.951	4.208	3.191	0.725
	1.254	29.087	44.373	51.595	9.285	31.413	40.257	62.544	-0.47	14.497	20.071	40.791	-6.465	30.414	30.371	51.855	2.499	15.29	34.669	65.033	-0.938	11.36	18.669	28.724	-0.203	10.407	28.524	52.688	-14.742	34.796	47.622	54.522	-3.616	10.792	38.675	37.773	6.255	14.803	16.962	35.534	-5.807	18.64	33.442	33.098	-1.225	12.951	4.208	3.191	0.725
	1.254	29.087	26.345	51.595	9.285	31.413	40.257	62.544	-0.47	14.497	20.071	40.791	-6.465	30.414	24.842	51.855	2.499	15.29	34.669	65.033	-0.938	11.36	18.669	28.724	-0.203	10.407	28.524	52.688	-14.742	37.288	47.622	54.522	-3.616	10.792	38.675	37.773	6.255	14.803	16.962	35.534	-5.807	18.64	33.442	33.098	-1.225	12.951	21.939	3.191	0.725
	1.254	29.087	26.345	51.595	9.285	31.413	40.257	62.544	-0.47	14.497	20.071	40.791	-6.465	30.322	24.842	54.778	2.499	15.29	34.669	65.033	-0.938	11.36	18.669	28.724	-0.637	10.407	28.524	52.688	-14.742	37.288	47.622	54.522	-3.616	10.792	38.675	37.773	-0.819	14.803	16.962	35.534	-5.807	18.64	33.442	33.098	-1.225	12.951	21.939	3.191	0.725
	1.254	29.087	26.345	51.595	9.285	31.413	40.257	62.544	-0.47	14.497	20.071	30.334	-6.465	30.322	42.761	54.778	2.499	15.29	34.669	65.033	-0.938	11.36	18.669	28.724	-0.637	10.407	28.524	52.688	11.509	37.288	47.622	54.522	-3.616	9.906	38.675	37.773	-0.819	14.803	16.962	35.534	-5.807	18.64	24.306	33.098	-1.225	12.951	21.939	3.191	0.725
	1.254	29.087	26.345	51.595	9.285	31.413	40.257	62.544	-0.47	14.497	20.071	34.767	3.09	30.322	42.761	54.778	2.499	15.29	23.528	65.033	-0.938	16.492	18.669	30.239	-0.637	10.407	28.524	38.075	11.509	37.288	47.622	54.522	-3.616	9.906	38.675	37.773	-0.819	14.803	16.962	35.534	-5.807	18.64	24.306	33.098	-1.225	12.951	21.939	3.191	0.725
	1.254	29.087	26.345	51.595	9.285	31.413	40.257	50.415	-0.47	14.497	20.071	34.767	3.09	30.322	38.585	54.778	2.499	15.29	23.528	65.033	-0.938	16.492	18.669	30.239	-0.637	10.407	28.524	38.075	11.509	37.288	47.622	54.522	-3.616	9.906	38.675	37.773	-0.819	22.765	16.962	35.534	-5.807	18.64	24.306	33.098	-1.225	12.951	21.939	3.191	0.725
	1.254	29.087	26.345	51.595	9.285	31.413	40.257	63.608	-0.47	14.497	20.071	34.767	3.09	30.322	38.585	54.778	2.499	15.29	23.528	65.033	-0.938	16.492	18.669	30.239	-0.637	10.407	28.524	38.075	11.509	37.288	47.622	54.522	-3.616	9.906	38.675	37.773	-0.819	22.765	16.962	35.534	3.728	18.64	24.306	46.145	-1.225	12.951	21.939	3.191	0.725
	0.733	29.087	26.345	51.595	1.394	31.413	40.257	63.608	-0.47	14.497	20.071	33.452	-8.221	30.322	38.585	54.778	2.499	15.29	23.528	65.033	-0.938	16.492	18.669	30.239	-0.637	10.334	28.524	38.075	-4.424	30.821	47.622	54.522	-2.434	9.906	38.675	37.773	-0.819	22.946	16.962	35.534	3.728	18.64	24.306	46.145	-1.225	12.951	21.939	3.191	0.725
	0.733	29.087	12.336	31.128	1.394	31.413	24.446	63.608	2.694	17.115	20.071	33.452	-8.221	30.322	38.585	48.972	2.499	15.29	23.255	65.033	-0.938	16.492	18.669	30.239	-0.637	10.334	28.524	38.075	-4.424	30.821	47.622	54.522	-2.434	9.906	38.675	37.773	-0.819	22.946	16.962	35.534	3.728	18.64	24.306	46.145	-1.225	12.951	21.939	3.191	0.725
	0.83	29.087	12.336	31.128	-0.493	31.413	24.446	70.204	2.694	17.115	25.944	33.452	-8.221	30.322	38.585	48.972	2.499	15.29	23.255	65.033	-0.938	16.492	18.669	27.075	-0.637	10.334	28.524	38.075	-4.424	30.821	47.622	54.522	-2.434	9.906	38.675	37.773	-0.819	22.946	16.962	35.534	3.728	18.64	24.306	46.145	-1.225	12.951	33.35	3.191	0.725
	0.83	29.087	12.336	31.128	-0.493	31.413	24.446	70.204	2.694	17.115	25.944	33.452	-8.221	30.322	38.585	48.972	-2.098	15.29	23.255	65.033	-0.938	16.492	18.669	27.075	-0.637	20.505	28.524	38.075	-4.424	30.821	47.622	54.522	-2.434	9.906	38.675	37.773	-0.819	22.946	16.962	35.534	3.728	18.64	24.564	37.192	-1.225	21.668	33.35	3.191	0.725
	0.83	29.087	12.336	31.128	-0.493	31.413	24.446	58.697	2.694	17.115	8.139	33.452	-8.221	33.905	38.585	48.972	-2.098	15.29	23.255	65.033	-0.938	16.492	18.669	27.075	-0.637	20.505	28.524	51.185	-4.424	30.791	59.336	54.522	-2.434	9.906	38.675	37.773	-0.819	22.946	16.962	25.318	3.728	18.64	24.564	37.192	-1.225	21.668	33.35	3.191	0.725
	-6.002	29.087	12.336	31.128	-0.493	31.413	44.099	58.697	2.694	17.115	8.139	33.452	-8.221	33.905	38.585	48.972	-2.098	15.29	16.767	65.033	-0.938	16.492	18.669	27.075	-0.637	20.505	28.524	51.185	7.146	30.791	59.336	54.522	-2.434	9.906	38.675	40.335	-0.819	22.946	16.962	25.318	3.728	18.64	24.564	37.192	-1.225	21.668	33.35	3.191	0.725
	-6.002	29.087	12.336	35.414	-0.493	31.413	44.099	58.697	2.694	17.115	8.139	33.452	4.5	33.905	38.585	48.972	-2.098	18.995	16.767	39.613	-0.938	16.492	18.669	27.075	-0.637	20.505	28.524	51.185	7.146	30.791	59.336	54.522	-2.434	9.906	38.675	40.335	-0.819	17.355	16.962	25.318	3.728	18.64	24.564	37.192	-1.225	21.668	33.35	3.191	0.725
	-6.002	29.087	12.336	35.414	-0.493	31.413	44.099	58.697	2.694	17.115	18.588	33.452	4.5	33.905	38.585	52.194	-2.098	18.995	16.767	39.613	-0.938	16.492	18.669	27.075	-0.637	21.987	28.524	51.185	7.146	30.791	59.336	42.988	-2.434	9.906	38.675	38.021	-0.819	17.355	16.962	25.318	3.728	18.64	24.564	37.192	-1.225	21.668	33.35	3.191	0.725
	-6.002	29.087	21.524	35.414	-0.493	31.413	44.099	61.491	3.521	17.115	18.588	33.452	4.5	33.905	38.585	52.194	-2.098	18.995	16.767	34.086	-0.938	16.492	18.669	27.075	-0.637	21.987	19.406	51.185	7.146	30.791	59.336	42.988	-2.434	9.906	38.675	38.021	-0.819	17.355	16.962	25.318	3.728	18.64	24.564	37.192	-1.225	17.376	33.35	3.191	0.725
	4.61	29.087	20.568	35.414	-0.493	31.413	44.099	61.491	3.521	17.115	18.588	33.452	4.5	33.905	38.585	52.194	-2.098	13.94	9.833	34.086	-0.938	16.492	18.669	25.097	-0.637	21.987	19.406	51.185	7.146	37.139	59.336	48.812	-2.434	9.906	38.675	47.81	-0.819	17.355	16.962	25.318	3.728	23.5	24.564	37.192	-1.225	17.376	33.35	3.191	0.725
	4.61	29.087	20.568	35.414	-0.493	31.413	44.099	61.491	3.521	17.115	18.588	33.452	4.5	33.905	38.585	52.194	-2.098	13.94	9.833	34.086	-0.938	16.492	18.669	25.097	-0.637	21.987	19.406	51.185	7.146	37.139	59.336	48.812	-2.434	9.906	38.675	47.81	-0.819	17.355	16.962	25.318	3.728	23.5	24.564	37.192	2.889	17.376	33.35	3.191	0.725
	4.61	29.087	20.568	35.414	-0.493	31.413	44.099	61.491	3.521	17.115	18.588	33.452	4.5	33.905	38.585	52.194	-2.098	13.94	9.833	34.086	-0.938	16.492	18.669	25.097	-0.637	12.454	19.406	51.185	7.146	37.139	59.336	48.812	-2.434	15.544	38.675	47.81	-0.819	17.355	16.962	25.318	3.728	23.5	24.564	37.192	2.889	17.376	33.35	3.191	0.725
	4.61	29.087	23.113	35.414	-6.546	31.413	44.099	61.491	3.521	17.115	18.588	50.933	4.5	33.905	38.585	52.194	-2.098	13.94	9.833	36.814	-0.938	16.492	18.669	29.221	-0.637	12.454	21.239	51.185	7.146	37.139	59.336	52.983	-2.434	15.544	38.675	44.01	-0.819	17.355	16.962	25.318	3.728	23.5	24.564	31.042	2.889	17.376	33.35	3.191	0.725
	-1.068	29.087	23.113	32.547	-6.546	31.413	44.099	45.83	3.521	17.115	8.936	50.933	4.5	33.905	38.585	52.194	-2.221	13.94	9.833	36.814	-0.938	16.492	9.007	29.221	-0.637	12.454	21.239	51.185	7.146	37.139	48.453	52.983	-2.434	15.544	13.359	44.01	-0.819	17.355	16.962	25.318	3.728	23.5	24.564	31.042	2.889	17.376	33.35	3.191	0.725
	-1.068	29.087	23.113	32.547	-6.546	31.413	44.099	45.83	3.521	17.115	8.936	50.933	4.5	33.905	38.585	48.491	-2.221	13.94	9.833	36.814	-0.938	16.492	9.007	29.221	-0.637	12.454	21.239	51.185	7.627	37.139	48.453	52.983	7.859	15.544	13.359	44.01	-1.465	17.355	16.962	25.318	-0.292	23.5	24.564	31.042	2.889	17.376	33.35	3.191	0.725
	-1.068	29.087	23.113	32.547	-6.546	31.413	44.099	45.83	3.521	17.115	8.936	34.519	4.5	33.905	38.585	48.491	-2.221	13.94	36.544	36.814	-0.938	16.492	9.007	29.221	-0.637	12.454	21.239	51.185	7.627	37.139	48.453	52.983	7.859	15.544	21.202	44.01	-1.465	17.355	16.962	25.318	-0.292	23.5	24.564	43.683	2.889	17.376	33.35	3.191	0.725
	-12.911	29.087	23.113	32.547	-6.546	31.413	44.099	45.83	3.521	17.115	8.936	34.519	4.5	33.905	17.343	48.491	-2.221	13.94	36.544	36.814	-0.938	16.492	9.007	29.221	-0.637	11.401	21.239	51.185	7.627	37.139	48.453	52.983	1.509	15.544	17.824	33.606	-1.465	17.355	16.962	25.318	-0.292	23.5	24.564	43.683	2.889	17.376	33.35	-0.875	-0.551
	-12.911	29.087	23.113	32.547	-6.546	31.413	44.099	47.468	3.521	17.115	8.936	34.519	4.5	33.905	17.343	48.491	-2.221	13.94	36.544	36.814	-0.938	12.461	9.007	29.221	-0.637	11.401	21.239	51.185	7.627	37.139	48.453	53.053	1.509	15.544	17.824	33.606	-1.465	17.355	16.962	25.318	-0.292	23.5	24.564	43.683	2.889	17.376	21.896	-0.875	-0.551
	-12.911	29.087	23.113	29.587	3.17	31.413	44.099	47.468	3.521	17.115	8.936	39.503	4.5	33.905	17.343	48.491	-2.221	13.94	36.544	48.128	-0.898	12.461	9.007	29.221	-0.637	11.401	23.499	51.185	1.741	37.139	48.453	53.053	1.509	15.544	17.824	33.606	-1.465	17.355	16.962	25.318	-7.909	23.5	29.791	43.683	8.692	17.376	21.896	-0.875	-0.551
	-7.381	29.087	21.547	29.587	3.17	31.413	44.099	47.468	3.521	17.115	8.936	39.503	4.5	33.905	65.308	48.491	-2.221	19.043	36.544	48.128	-0.898	12.461	9.007	29.221	-0.637	22.58	23.499	51.185	1.741	37.139	48.453	53.053	1.509	15.544	17.824	33.606	-1.465	17.355	16.962	25.318	-7.909	23.5	29.791	43.683	8.692	17.376	17.975	-0.875	-0.551
	-7.381	29.087	21.547	29.587	-14.041	31.413	44.099	47.114	-1.989	17.115	8.936	39.503	4.5	33.905	37.967	48.491	-2.221	19.043	36.544	48.128	-0.898	12.461	9.007	29.221	-0.637	22.58	23.499	51.185	1.741	37.139	48.453	53.053	1.509	15.544	17.824	33.606	-1.465	17.355	16.962	25.318	-7.909	23.5	29.791	43.683	8.692	17.376	17.975	-0.875	-0.551
	-7.381	29.087	21.547	38.262	-14.041	31.413	16.352	47.114	-1.989	17.115	8.936	39.503	-2.076	33.905	37.967	48.516	-1.481	10.441	36.544	40.566	-0.898	12.461	9.007	29.221	-0.637	19.128	23.499	51.185	1.741	28.322	48.453	53.053	1.509	15.544	17.824	33.606	-1.465	17.355	16.962	25.318	-9.03	23.5	29.791	43.683	-6.639	17.376	17.975	-0.875	-2.472
	-7.381	29.087	21.547	38.262	-14.041	31.413	16.352	47.114	-1.989	17.115	8.936	39.503	-2.076	33.905	37.967	48.516	-1.481	10.441	36.544	40.566	-0.898	12.461	9.007	29.221	-0.637	19.128	23.499	51.185	1.741	28.322	48.453	53.053	1.509	15.544	17.824	33.606	-1.465	17.355	16.962	25.318	-9.03	23.5	29.791	43.683	-6.639	17.376	17.975	-0.875	-2.472
	-7.381	29.087	21.547	44.406	-3.851	31.413	16.352	47.159	-1.989	17.115	8.936	39.503	5.199	33.905	14.563	49.552	0.001	10.441	46.886	40.566	-0.898	12.461	9.007	29.221	-0.637	19.128	23.499	51.185	1.741	28.322	48.453	50.347	1.509	15.544	17.824	40.53	-1.465	17.355	16.962	25.318	-9.03	23.5	29.791	43.683	-6.639	21.398	17.975	-0.875	-2.472
	-7.381	29.087	32.502	44.406	-3.851	31.413	16.352	47.159	-1.989	17.115	8.936	37.361	5.199	33.905	14.563	49.552	0.001	10.441	46.886	40.566	-0.898	12.461	9.007	29.221	-0.637	19.128	23.499	51.185	-6.894	28.322	48.453	50.347	1.509	15.544	17.824	40.53	-1.465	17.355	16.962	25.318	-9.03	23.5	28.693	43.683	-6.639	21.398	17.975	-0.875	-2.472
	-7.381	29.087	32.502	44.406	-3.851	31.413	16.352	47.159	-1.989	17.115	8.936	37.361	5.199	33.905	21.324	49.552	0.001	5.244	55.913	45.236	-0.898	12.461	9.007	29.221	-0.637	19.128	23.499	51.185	-6.894	28.718	48.453	50.347	1.509	15.544	17.824	40.53	-1.465	17.355	16.962	25.318	0.413	23.5	28.693	43.683	-2.784	21.398	17.975	-0.875	-2.472
	-7.381	29.087	32.502	44.406	-3.851	31.413	16.352	47.159	-1.989	17.115	8.936	37.361	-16.293	33.905	21.324	28.058	0.001	5.244	55.913	45.236	-0.898	12.461	9.007	29.221	-0.637	19.128	35.845	51.185	-6.894	28.718	48.453	50.347	1.509	15.544	17.824	40.53	-1.465	17.355	16.962	25.318	0.413	23.5	10.739	43.683	-2.784	21.398	17.975	-0.875	-2.472
	-7.381	29.087	32.502	44.406	-3.851	31.413	16.352	53.668	-12.861	17.115	8.936	37.361	-16.293	33.905	21.324	28.058	0.001	5.244	55.913	45.236	-0.898	12.461	9.007	29.221	-0.637	19.128	38.237	51.185	-6.894	28.718	48.453	50.347	1.509	15.544	29.408	40.53	-1.465	17.355	16.962	25.318	0.413	23.5	10.739	43.683	-2.784	21.398	32.235	-0.875	-2.472
	-7.381	29.087	24.35	44.406	-3.851	31.413	16.352	53.668	-12.861	17.115	8.936	37.361	-16.293	33.905	21.324	28.058	0.001	5.244	29.372	45.236	-0.898	12.461	9.007	29.221	-0.637	19.128	38.237	51.185	-6.894	28.718	48.453	50.347	1.509	15.544	29.408	40.53	-1.465	17.355	16.962	25.318	0.413	23.5	10.739	43.683	-2.784	21.398	32.235	-0.875	-2.472
	-7.381	29.087	24.35	36.118	-3.851	31.413	16.352	53.668	-12.861	17.115	8.936	37.361	-16.293	33.905	21.324	28.058	0.001	10.636	29.372	45.236	-0.898	12.461	9.007	29.221	-0.637	19.128	38.237	51.185	-6.894	28.718	17.612	66.733	1.509	15.544	24.873	40.53	-1.465	17.355	16.962	25.318	0.413	23.5	30.466	43.683	-2.784	21.398	31.505	-0.875	-5.46
	7.025	29.087	24.35	36.118	-3.851	31.413	16.352	45.781	1.638	17.115	8.936	37.361	-16.293	33.905	21.324	28.058	0.001	10.636	29.372	53.709	-0.898	12.461	9.007	29.221	-0.637	19.128	38.237	51.185	-6.894	28.718	17.612	66.733	1.509	15.544	24.873	28.932	-1.465	17.355	16.962	25.318	-0.516	23.5	30.466	43.683	-2.784	21.19	31.505	-0.875	-5.46
	-0.135	29.087	24.35	35.222	24.16	31.413	46.688	45.781	1.638	17.115	8.936	37.361	-16.293	33.905	20.523	28.058	-12.324	10.636	29.372	53.709	-0.898	12.461	9.007	29.221	-0.637	19.128	38.237	51.185	-6.894	21.552	17.612	66.733	1.509	15.544	24.873	28.932	-1.465	17.355	16.962	25.318	-0.516	23.5	30.466	43.683	-2.784	21.19	31.505	-0.875	-5.46
	-0.135	23.451	28.733	35.222	24.16	31.413	46.688	45.781	1.638	17.115	8.936	37.361	-16.293	33.905	20.523	28.058	-12.324	10.636	29.372	53.709	-0.898	12.461	9.007	29.221	-0.637	19.128	38.237	51.185	-6.894	21.552	17.612	54.928	1.509	15.544	24.873	28.932	-1.465	17.355	16.962	25.318	-0.516	23.5	30.466	43.683	-2.784	21.19	31.505	-0.875	-5.46
	-0.135	23.451	28.733	33.337	24.16	31.413	46.688	45.781	1.638	17.115	8.936	37.361	-0.707	23.66	20.523	34.701	-12.324	10.636	31.382	53.709	-0.898	12.461	21.048	29.221	-0.637	19.128	38.237	51.185	-6.894	21.552	17.612	54.928	1.509	15.544	24.873	28.932	-1.465	17.355	16.962	25.318	-0.516	23.5	30.466	43.683	-2.784	21.19	62.678	-0.875	-5.46
	-0.135	23.451	28.733	57.761	1.635	31.413	46.688	45.781	1.638	17.115	8.936	37.361	-0.707	23.66	20.523	34.701	8.06	10.636	31.382	53.709	2.7	12.461	21.048	29.221	-0.637	19.128	25.084	51.185	-6.894	21.552	17.612	54.928	1.509	15.544	29.417	28.932	-1.465	17.355	16.962	25.318	-0.751	23.5	30.466	43.683	-2.784	21.19	62.678	-0.875	-5.46
	1.833	23.451	28.733	57.761	1.635	31.413	46.688	45.781	1.638	17.115	8.936	37.361	-0.707	23.66	20.523	34.701	8.06	10.636	31.382	53.709	2.7	12.461	21.048	29.221	-0.637	19.128	25.084	51.185	-6.894	21.552	17.612	54.928	1.509	15.544	29.417	28.932	0.281	17.355	16.962	25.318	-0.751	23.5	30.466	43.683	-2.784	21.19	62.678	-0.875	-5.46
	1.833	23.451	17.49	36.175	1.635	31.413	9.905	66.611	1.638	17.115	8.936	37.361	-0.707	11.611	20.523	34.701	8.06	10.636	31.382	53.709	2.7	12.461	21.048	29.221	-0.637	19.128	25.084	51.185	1.491	21.552	17.612	54.928	1.509	15.544	29.417	28.932	0.281	17.355	16.962	27.443	-0.751	23.5	30.466	43.683	-0.86	21.19	62.678	-0.875	-5.46
	1.833	23.451	17.49	36.175	1.635	31.413	9.905	66.611	1.638	17.115	25.329	37.361	-0.707	11.611	20.523	33.223	8.06	10.636	31.382	53.709	2.7	11.846	21.048	29.221	-0.637	19.128	25.084	51.185	1.491	21.552	17.612	54.928	1.509	15.544	29.417	37.749	-0.016	17.355	16.962	27.443	-0.751	23.5	30.466	43.683	-0.86	21.19	62.678	-0.875	-5.46
	1.833	23.451	17.49	49.643	1.635	31.413	17.665	66.611	1.638	17.115	25.329	37.361	-0.707	11.611	20.523	33.223	8.06	10.636	31.382	53.709	2.7	11.846	21.048	24.569	-0.637	19.128	25.084	51.185	1.491	21.552	17.612	54.928	1.509	15.544	29.417	37.749	-0.016	17.355	16.962	27.443	-0.751	23.5	15.155	43.683	-0.86	21.19	62.678	-0.875	-5.46
	1.833	23.451	17.49	49.643	1.635	31.413	17.665	66.611	1.638	17.115	25.329	37.361	-0.707	11.611	20.523	33.223	8.06	10.636	31.382	53.709	2.7	11.846	21.048	24.569	-0.637	19.128	25.084	51.185	1.491	21.552	17.612	54.928	1.509	15.544	29.417	37.749	-0.016	17.355	10.15	27.443	-0.751	23.5	15.155	43.683	-0.86	21.19	44.789	-0.875	-5.46
	4.816	23.451	30.13	49.643	0.654	31.413	17.665	51.947	1.638	17.115	25.329	37.361	-0.707	11.611	7.754	33.223	8.06	10.636	31.382	53.709	2.7	11.846	21.048	24.569	-0.637	19.128	25.084	51.185	1.491	21.552	17.612	55.348	1.509	15.544	29.417	37.749	-0.016	17.355	10.15	27.443	-0.751	23.5	15.155	43.683	-0.86	21.19	44.789	-0.875	-5.46
	4.816	23.451	30.13	49.643	0.654	31.413	44.565	51.947	1.638	17.115	25.329	37.361	-0.707	11.611	7.754	42.651	8.06	16.717	31.382	52.273	2.7	11.846	15.86	24.569	-0.637	19.128	25.084	51.185	1.491	21.552	17.612	55.348	1.509	15.544	29.417	37.749	-0.016	17.355	10.15	27.443	-0.751	23.5	15.155	43.683	-0.86	21.19	44.789	-0.875	-5.46
	4.816	23.451	30.13	49.643	-7.106	31.413	44.565	51.947	1.638	17.115	25.329	37.361	-0.707	11.611	13.685	42.651	1.887	16.717	31.382	52.273	2.7	11.846	15.86	24.569	-0.637	19.128	25.084	51.185	1.491	21.552	17.612	55.348	1.509	15.544	29.417	37.749	-0.016	17.355	10.15	27.443	-1.302	23.5	15.155	43.683	-0.86	21.19	39.72	-0.875	-5.46
	4.816	23.451	36.508	49.643	-7.106	24.576	50.889	51.947	1.638	17.115	25.329	37.361	-0.707	11.611	13.685	58.257	1.887	16.717	20.5	52.273	2.7	11.846	15.86	24.569	-0.637	19.128	25.084	51.185	1.491	20.567	17.612	55.348	1.509	15.544	29.417	37.749	-0.016	17.355	10.15	27.443	-1.302	23.5	15.155	43.683	-0.86	21.19	39.72	-0.875	-5.46
	4.816	23.451	36.508	49.643	-7.106	24.576	50.889	45.353	1.638	17.115	10.596	37.361	-0.707	11.611	16.019	58.257	1.887	16.717	20.5	52.273	2.7	11.846	15.86	24.569	-0.637	19.128	25.084	51.185	1.491	20.567	17.612	55.348	1.509	15.544	28.377	37.749	-0.016	17.355	10.15	27.443	-1.302	23.5	15.155	43.683	-0.86	21.19	16.808	-0.875	-5.46
	4.816	23.451	36.508	49.643	5.281	24.576	50.889	45.353	1.638	17.115	10.596	37.361	-0.707	13.812	16.019	58.257	1.887	16.717	20.5	52.273	2.7	11.846	15.86	24.569	-0.637	19.128	25.084	51.185	1.491	20.567	17.612	55.348	1.509	15.544	28.377	37.749	-0.016	17.355	10.15	27.443	-1.302	23.5	15.155	43.683	-0.86	21.19	16.808	-0.875	-5.46
	4.816	23.451	36.508	49.643	5.281	24.576	50.889	45.353	1.638	17.115	10.596	37.361	-0.707	13.812	16.019	58.257	1.887	16.717	24.166	52.273	2.7	11.846	15.86	24.569	-0.637	19.128	25.084	51.185	1.491	20.567	17.612	55.348	1.509	15.544	28.377	37.749	-0.016	17.355	18.502	27.443	-1.302	23.5	15.155	43.683	-0.86	16.983	16.808	-0.875	-5.46
	2.515	23.451	12.823	49.643	5.281	24.576	50.889	45.353	1.638	17.115	10.596	37.361	-0.707	14.979	16.019	58.257	1.887	6.042	24.166	52.273	2.7	11.846	15.86	24.569	-0.637	19.128	25.084	51.185	1.491	12.51	17.612	55.348	1.509	15.544	28.107	37.749	-0.016	13.737	18.502	30.581	-1.302	23.5	15.155	43.683	-0.86	16.983	16.808	-0.875	3.232
	2.515	23.451	12.823	49.643	5.281	24.576	50.889	55.397	1.638	17.115	10.596	37.361	-0.707	14.979	16.019	58.257	1.887	6.042	24.611	52.273	2.7	11.846	15.86	24.569	-0.637	19.128	25.084	51.185	1.491	12.51	17.612	55.348	1.509	15.544	28.107	37.749	-0.016	13.737	18.502	30.581	-1.302	23.5	15.155	43.683	-0.86	16.983	16.808	-0.875	3.232
	-4.169	13.577	12.823	49.643	11.577	24.576	41.841	55.397	1.638	17.115	10.596	37.361	-0.707	14.979	22.163	58.257	1.887	6.042	24.611	52.273	2.7	11.846	15.86	24.569	-0.637	24.364	25.084	51.185	1.491	14.987	17.612	55.348	1.509	15.544	23.56	37.749	-0.016	13.737	18.502	30.581	-1.302	23.5	15.155	43.683	-0.86	16.983	21.296	-0.875	3.232
	-4.169	13.577	15.743	36.432	2.759	24.576	41.841	55.397	1.638	17.115	10.596	37.361	4.619	14.979	22.163	58.257	1.887	9.746	24.611	52.273	2.7	11.846	15.86	24.569	-0.637	24.364	25.084	51.185	1.491	14.987	17.612	55.348	1.509	15.544	23.56	37.186	-0.016	13.737	18.502	30.581	-1.302	23.5	15.155	43.683	-0.86	16.983	21.296	-0.875	3.232
	-4.169	13.577	15.743	36.432	2.759	24.576	41.841	55.397	1.638	17.115	10.596	37.361	4.619	14.979	10.185	58.257	1.887	9.746	24.611	52.273	2.7	11.846	15.86	24.569	-0.637	24.364	25.084	51.185	1.491	14.987	17.612	55.348	1.509	15.544	30.66	37.186	-0.016	13.737	18.502	60.091	-1.302	23.5	15.155	43.683	-0.86	16.983	21.296	-0.875	3.232
	-4.169	13.577	15.743	36.432	2.759	24.576	41.841	55.397	1.638	17.115	10.596	37.361	-1.918	14.979	10.185	58.257	1.887	9.746	24.611	52.273	2.7	11.846	15.86	24.569	-0.637	24.364	25.084	51.185	1.491	14.987	17.612	55.348	1.509	15.544	30.66	37.186	-0.016	13.737	18.502	60.091	-1.302	23.5	15.155	43.683	-0.86	16.983	21.296	-0.875	3.232
	-4.169	13.577	9.295	36.432	2.759	24.576	41.841	55.397	1.638	17.115	15.656	37.361	-1.918	14.979	24.077	58.257	-4.749	9.746	24.611	52.273	2.7	11.846	15.86	24.569	-0.637	24.364	12.037	51.185	1.491	14.987	17.612	55.348	1.509	15.544	30.66	37.186	-0.016	13.737	18.794	60.091	-1.302	23.5	9.927	43.683	-0.86	18.005	21.296	-0.875	3.232
	-4.169	13.577	9.295	36.432	2.759	24.576	41.841	55.397	1.638	17.115	15.656	40.689	-1.918	14.979	24.077	58.257	-4.749	9.746	26.843	52.273	2.7	11.846	15.86	24.569	-0.637	24.364	12.037	51.185	1.491	14.987	17.612	55.348	1.509	15.544	30.66	34.302	-0.016	13.737	18.794	35.243	-1.302	23.5	9.927	43.683	-0.86	18.005	21.296	-0.875	3.232
	-4.169	13.577	9.295	73.73	-9.055	24.576	41.841	38.69	1.638	17.115	15.656	40.689	-1.918	14.979	24.077	58.257	-4.749	9.746	26.843	52.273	2.7	11.846	15.86	24.569	-0.637	24.364	12.037	51.185	1.491	14.987	17.612	55.348	1.509	15.544	30.66	34.302	-0.016	13.737	18.794	35.243	-1.302	23.5	9.927	43.683	-0.86	18.005	21.296	-0.875	3.232
	-4.169	13.577	9.295	73.73	-9.055	24.576	41.841	38.69	1.638	17.115	15.656	40.689	-1.918	14.979	24.077	56.228	-4.749	9.746	26.843	60.757	2.7	11.846	15.86	24.569	-0.637	24.364	12.037	51.185	1.491	21.847	17.612	55.348	1.509	15.544	33.536	34.302	-0.016	13.737	18.794	35.243	-1.302	23.5	42.685	51.825	-0.86	18.005	21.296	-0.875	3.232
	-4.169	13.577	9.295	73.73	-9.055	24.576	41.841	38.69	1.638	17.115	15.656	68.365	-1.918	9.636	24.077	56.228	-4.749	9.746	26.843	60.757	2.7	11.846	15.86	24.569	-0.637	16.854	12.037	51.185	1.491	22.077	17.612	55.348	1.509	15.544	33.536	34.302	-0.016	13.737	18.794	35.243	-1.302	23.5	42.685	51.825	-0.86	18.005	25.12	-0.875	3.232
	-4.169	13.577	9.295	75.337	-28.547	24.576	41.841	42.844	1.638	15.982	15.656	68.365	-1.918	9.636	24.077	56.228	-6.173	9.746	21.362	60.757	2.7	11.846	15.86	24.569	-0.637	16.854	12.037	51.185	1.491	22.077	17.612	55.348	1.509	15.544	33.536	34.302	-0.016	13.737	18.794	35.243	-1.302	23.5	42.685	51.825	-0.86	19.963	25.12	-0.875	3.232
	-4.169	13.577	9.295	75.337	-28.547	24.576	41.841	42.844	1.638	15.982	15.656	68.365	-1.918	9.636	19.078	56.228	-6.173	9.746	21.362	60.757	2.7	11.846	15.86	24.569	-0.637	16.854	12.037	51.185	1.491	22.97	17.612	55.348	1.509	15.544	33.536	34.302	-0.016	13.737	18.794	35.243	-1.302	23.5	42.685	51.825	-0.86	19.963	25.12	-0.875	3.232
	-4.169	13.577	9.295	75.337	-28.547	24.576	41.841	57.873	1.638	15.982	15.656	68.365	-1.918	9.636	19.078	56.228	-6.173	9.746	21.362	60.757	2.7	11.846	15.86	24.569	-0.637	18.441	9.082	51.185	1.491	22.97	30.928	55.348	1.509	15.544	33.536	34.302	-0.016	13.737	18.794	35.243	0.396	23.5	42.284	52.345	-0.86	19.963	25.12	-0.875	3.232
	-4.169	13.577	9.295	75.337	-28.547	24.576	41.841	57.873	1.638	15.982	15.656	68.365	-1.918	9.636	19.79	56.228	-6.173	9.746	21.362	60.757	2.7	11.846	15.86	24.569	-0.637	18.441	9.082	51.185	1.491	22.97	30.928	55.348	1.509	15.544	33.536	34.302	-0.016	13.737	18.794	35.243	0.396	23.5	42.284	52.345	-0.86	19.963	25.12	-0.875	3.232
	-17.487	13.577	9.295	75.337	-21.556	24.576	40.841	57.873	1.638	15.982	15.656	68.365	-1.918	9.636	19.79	56.228	-6.173	9.746	21.362	60.757	2.7	11.846	-4.88	24.569	-0.637	18.441	9.082	51.185	1.491	22.97	30.928	55.348	1.509	15.544	33.536	34.302	-0.016	13.737	18.794	44.931	0.396	23.5	42.284	52.345	-0.86	19.963	25.12	-0.875	3.232
	-17.487	13.577	13.809	75.337	-21.556	24.576	40.841	57.873	1.638	15.982	15.656	68.365	-1.918	9.636	19.79	56.228	-6.173	9.746	24.3	60.757	2.7	11.846	-4.88	24.569	-0.637	18.441	9.082	51.185	1.491	22.97	30.928	58.503	1.509	15.544	33.536	34.302	-0.016	13.737	18.794	44.931	0.396	23.5	42.284	52.345	-0.86	19.963	14.902	-0.875	3.232
	-17.487	13.577	13.809	75.337	-21.556	24.576	21.93	55.397	1.638	15.982	15.656	53.536	-1.918	9.636	19.79	56.228	-6.173	9.746	24.3	60.757	2.7	11.846	-4.88	24.569	-0.637	18.441	50.677	51.185	1.491	22.97	30.928	58.503	1.509	15.544	33.536	34.302	-0.016	13.737	18.794	44.931	0.396	23.5	42.284	52.345	-0.86	19.963	14.902	-0.875	3.232
	-17.487	13.577	13.809	75.337	3.667	24.576	21.93	55.397	1.638	15.982	15.656	53.536	-1.918	9.636	19.79	48.607	-6.173	9.746	24.3	60.757	2.7	11.846	-4.88	24.569	-0.637	18.441	50.677	51.185	1.491	22.97	30.928	58.503	1.509	15.544	33.536	37.194	-0.016	13.737	18.794	44.931	0.396	19.014	42.284	52.345	-0.86	19.963	14.902	-0.875	2.664
	-17.487	13.577	13.809	75.337	3.667	24.576	21.93	55.397	1.638	15.982	15.656	53.536	-1.918	9.636	19.79	48.607	-6.173	9.746	24.3	60.757	2.7	11.846	-4.88	24.569	-0.637	18.441	50.677	51.185	1.491	22.97	30.928	58.503	1.509	15.544	33.536	37.194	-0.016	13.737	18.794	44.931	0.396	19.014	25.019	52.345	-0.86	19.963	14.902	-0.875	2.664
	-17.487	13.577	13.809	75.337	7.83	24.576	21.93	55.397	1.638	15.982	15.656	43.336	-1.918	9.636	19.79	36.08	5.888	9.746	24.3	59.354	2.7	11.846	-4.88	24.569	-0.637	18.441	50.677	51.185	-11.931	22.97	30.928	58.503	1.509	15.544	33.536	37.194	-0.016	13.737	18.794	44.931	0.396	19.904	25.019	52.345	-0.86	19.963	14.902	-0.875	2.664
	-17.487	13.577	13.809	75.337	7.83	24.576	55.008	55.397	1.638	15.982	15.656	43.336	2.528	9.636	19.79	36.08	5.888	9.746	24.3	59.354	2.7	11.846	-4.88	24.569	-0.637	18.441	50.677	51.185	-11.931	22.97	30.928	58.503	1.509	15.544	33.536	37.194	-0.016	13.737	18.794	44.931	0.396	19.904	30.556	52.345	-0.86	19.963	14.828	-0.875	2.664
	-4.335	13.577	19.791	75.337	7.83	24.576	55.008	67.058	1.638	15.982	15.656	47.766	2.528	9.636	19.79	36.08	5.888	9.746	24.3	59.354	2.7	11.846	-4.88	24.569	-0.637	18.441	50.677	51.185	-11.931	22.97	30.928	58.503	1.509	15.544	33.536	37.194	-0.016	13.737	18.794	44.931	0.396	19.904	30.556	52.345	-0.86	19.963	14.828	-0.875	2.664
	-4.335	13.577	19.791	75.337	7.83	24.576	55.008	67.058	1.638	15.982	15.656	47.766	2.528	9.636	19.79	36.08	5.888	9.746	24.3	59.354	2.7	11.846	-4.88	24.569	-0.637	18.441	50.677	51.185	-4.126	22.97	30.146	58.503	1.509	15.544	33.536	37.194	-0.016	13.737	18.794	44.931	8.523	19.904	30.556	52.345	-0.86	19.963	14.828	-0.875	2.664
	-4.335	20.122	14.279	75.337	7.83	24.576	55.008	67.058	1.638	15.982	15.656	47.766	2.528	9.636	19.79	36.08	5.888	9.746	19.835	40.602	2.7	11.846	-4.88	24.569	-0.637	18.441	50.677	51.185	-4.126	22.97	30.146	58.503	1.509	15.544	33.536	37.194	-0.016	13.737	18.794	44.931	8.523	19.904	30.556	52.345	3.257	20.07	19.037	-0.875	2.664
	-4.335	20.122	14.279	75.337	17.138	24.576	27.653	35.683	1.638	15.982	15.656	47.766	2.528	12.654	19.79	36.08	9.576	9.746	19.835	40.602	2.7	11.846	-4.153	24.569	-0.637	18.441	50.677	51.185	-4.126	22.97	30.146	58.503	1.509	15.544	33.536	37.194	6.437	13.737	18.794	44.931	8.523	19.904	30.556	52.345	3.257	20.07	19.037	-0.875	2.664
	-4.335	20.122	14.279	75.337	17.138	24.576	27.653	35.683	1.638	15.982	15.656	47.766	2.528	12.654	19.79	36.215	9.576	9.746	22.145	40.602	2.7	11.846	-4.153	24.569	-0.637	19.553	50.677	51.185	-4.126	22.97	30.146	58.503	1.509	15.544	33.536	37.194	6.437	13.737	18.794	44.931	0.678	19.904	30.556	52.345	3.257	20.07	19.037	-0.875	2.664
	-4.335	20.122	21.021	75.337	17.138	24.576	27.653	35.683	1.638	15.982	15.656	47.766	2.528	12.654	19.79	36.215	9.576	9.746	22.145	40.602	2.7	11.846	-4.153	24.569	-0.637	19.553	50.677	51.185	-4.126	22.97	30.146	58.503	1.509	15.544	33.536	37.194	6.437	13.737	18.794	44.931	0.678	19.904	30.556	52.345	3.257	20.07	19.037	-0.875	4.633
	-4.335	26.388	21.021	77.902	-1.1	24.576	27.653	35.683	1.638	15.982	15.656	47.766	2.528	12.654	19.79	36.422	7.795	9.746	22.145	40.602	2.7	11.846	-4.153	24.569	-0.637	19.553	50.677	51.185	-4.126	22.97	30.146	58.503	1.509	15.544	33.536	37.194	7.471	13.737	18.794	44.931	0.678	19.904	30.556	52.345	-3.553	20.07	19.037	-0.875	4.633
	-4.335	26.388	21.021	77.902	-1.1	14.678	27.653	70.783	1.638	15.982	15.656	47.766	2.528	12.654	19.79	36.422	7.795	9.746	22.145	40.602	2.7	11.846	-4.153	24.569	-0.637	19.553	51.967	51.185	-4.126	22.97	30.146	58.503	1.509	15.544	33.536	32.179	7.471	13.737	18.794	44.931	0.678	19.904	30.556	52.345	-3.553	20.07	19.037	-0.875	4.633
	-4.335	26.388	15.958	77.902	-1.1	14.678	27.653	70.783	1.638	15.982	15.656	47.766	2.528	12.654	19.79	36.198	7.795	9.746	22.145	40.602	2.7	11.846	-4.153	24.569	-0.637	19.553	51.967	50.104	-4.126	22.97	30.146	58.503	1.509	15.544	33.536	32.179	7.471	13.737	18.794	44.931	0.678	14.072	30.556	52.345	-3.553	20.07	19.037	-0.875	4.633
	-4.335	26.388	15.958	77.902	-1.1	21.9	27.653	70.783	1.638	15.982	15.656	47.766	2.528	12.654	19.79	36.198	-8.196	9.746	22.145	40.602	2.7	11.846	-4.153	24.569	-0.637	19.553	51.967	50.104	-4.126	22.97	30.146	58.503	1.509	15.544	33.536	32.179	-6.013	13.737	18.794	44.931	0.678	14.072	30.556	52.345	-3.553	20.07	19.037	-0.875	-5.103
	-4.335	26.388	15.958	77.902	-1.1	21.9	13.519	70.783	-12.704	15.982	15.656	47.766	2.528	12.654	19.79	36.198	-8.196	9.746	22.145	40.602	2.7	11.846	-4.153	26.579	-0.637	19.553	51.967	50.104	-0.178	22.97	30.146	58.503	1.509	15.544	33.536	32.179	-6.013	13.737	18.794	44.931	0.678	14.072	30.556	52.345	-3.553	20.07	19.037	-0.875	-5.103
	-4.335	26.388	15.958	77.902	-5.132	21.9	13.519	70.783	-12.704	15.982	15.656	47.766	2.528	12.654	19.79	36.198	-8.196	9.746	22.145	40.602	2.7	11.846	-4.153	26.579	-0.637	19.553	62.869	44.955	-0.178	29.583	30.146	58.503	1.509	15.544	33.536	32.179	-6.013	13.737	18.794	44.931	0.678	14.072	30.556	52.345	-3.553	20.07	19.037	-0.875	3.785
	-4.335	26.388	15.958	77.902	-5.132	21.9	13.519	70.783	-12.704	15.982	37.922	47.766	2.528	12.654	19.79	36.198	-8.196	9.746	22.145	40.602	2.7	11.846	-4.153	28.645	-0.637	19.553	62.869	44.955	-0.178	29.583	30.146	58.503	1.509	15.544	33.536	32.179	-6.013	13.737	18.794	44.931	0.678	14.072	30.556	52.345	-3.553	20.07	19.037	-0.875	3.785
	-4.335	26.388	15.958	77.902	-5.132	21.9	13.519	70.783	-4.815	15.982	37.922	47.766	2.528	12.654	19.79	36.198	-8.196	9.746	22.145	40.602	2.7	11.846	-1.189	28.645	-0.637	19.553	62.127	44.955	-0.178	24.888	30.146	58.503	1.509	15.544	33.536	32.179	-0.959	13.737	18.794	44.931	0.678	14.072	30.556	52.345	-3.553	20.07	19.037	-0.875	-0.867
	-3.506	26.388	15.958	77.902	-5.132	21.9	13.519	70.783	-4.815	15.982	37.922	47.766	2.528	12.654	19.79	36.198	-8.196	9.746	22.145	40.602	2.7	11.846	-1.189	28.645	-0.637	19.553	62.127	44.955	-0.178	24.888	30.146	58.503	1.509	15.544	33.536	32.179	-0.959	13.737	18.794	44.931	0.678	14.072	30.556	52.345	-3.553	20.07	19.037	-0.875	-0.867
	-3.506	26.388	15.958	77.902	-5.132	21.9	13.519	70.783	-4.815	15.982	37.922	47.766	2.528	12.654	19.79	36.198	-8.196	9.746	22.145	40.602	2.7	11.846	-1.189	28.645	-0.637	19.553	62.127	44.955	-0.178	24.888	30.146	58.503	1.509	15.544	33.536	32.179	-0.959	13.737	18.794	44.931	0.678	14.072	30.556	52.345	-3.553	20.07	19.037	-0.875	-0.867
	-3.506	26.388	15.958	77.902	-5.132	11.289	13.519	70.783	-4.815	15.982	37.922	47.766	2.528	12.654	19.79	36.198	-8.196	9.746	22.145	40.602	2.7	11.846	-1.189	28.645	-0.637	19.553	62.127	44.955	-0.178	24.888	32.141	58.503	1.509	15.544	33.536	32.179	-0.959	13.737	18.794	44.931	0.678	14.072	30.556	52.345	-3.553	20.07	19.037	-0.875	4.015
	-3.506	26.388	25.876	77.902	-5.132	11.289	13.519	70.783	-4.815	15.982	37.922	47.766	2.528	12.654	19.79	36.198	-8.196	9.746	22.145	40.602	-1.672	11.846	-1.189	28.645	-0.637	19.553	62.127	43.827	-0.178	24.888	32.141	58.503	1.509	15.544	31.051	32.179	-0.959	16.58	18.794	44.931	0.678	14.072	30.556	52.345	1.863	20.07	19.037	-0.875	4.015
	-3.506	26.388	25.876	77.902	-5.132	11.289	13.519	70.783	-4.815	15.982	37.922	47.766	2.528	12.654	19.79	36.198	-8.196	9.746	22.145	40.602	-1.672	11.846	-1.189	28.645	-0.637	19.553	62.127	43.827	-0.178	24.888	32.141	58.503	1.509	15.544	31.051	31.694	-0.959	16.58	18.794	44.931	0.678	14.072	30.556	52.345	1.863	20.07	19.037	-0.875	4.015
	-3.506	26.388	25.876	77.902	-5.132	27.198	13.519	70.783	-4.815	15.982	37.922	47.766	2.528	12.654	13.807	36.198	-8.196	9.746	22.145	40.602	-1.672	11.846	-1.189	28.645	-0.637	19.553	62.127	43.827	-0.178	19.356	32.141	58.503	-0.337	15.544	31.051	31.694	-0.959	16.58	18.794	44.931	0.678	14.072	30.556	52.345	1.863	20.07	19.037	-0.875	4.015
	-3.506	26.388	8.936	77.902	-5.132	27.198	13.519	70.783	-4.815	15.982	37.922	47.766	2.528	12.654	13.807	36.198	3.077	9.746	22.145	35.519	-1.672	11.846	-1.189	28.645	-0.637	19.553	62.127	43.827	-0.178	19.356	32.141	58.503	-0.337	15.544	33.414	31.694	-0.959	16.58	18.794	44.931	0.678	14.072	30.556	52.345	1.863	20.07	19.037	-0.875	4.015
	-3.506	26.388	8.936	77.902	-5.132	27.198	39.497	70.783	-4.815	15.982	37.922	47.766	2.528	12.654	13.807	36.198	3.077	9.746	22.145	35.519	-1.672	11.846	-1.189	38.133	-0.637	19.553	62.127	43.827	-0.178	19.356	32.141	58.503	-0.337	15.544	33.414	34.186	-0.959	16.58	18.794	44.931	-0.281	14.072	30.556	52.345	1.863	20.07	19.037	-0.875	4.015
	-3.506	26.388	8.936	77.902	0.123	27.198	39.497	70.783	2.467	15.982	37.922	47.766	2.528	12.654	13.807	36.198	3.077	9.746	22.145	35.519	-1.672	11.846	-1.189	38.133	-0.637	19.553	62.127	43.827	-0.178	19.356	32.141	58.503	-0.337	15.544	33.414	34.186	-0.959	16.58	18.794	47.782	-0.281	27.488	30.556	52.345	1.863	23.051	19.037	-0.875	-11.022
	-3.506	26.388	8.936	77.902	0.123	27.198	39.497	70.783	2.467	15.982	37.922	47.766	2.528	12.654	13.807	36.198	3.077	9.746	22.145	42.517	-1.672	11.846	-1.189	38.133	-0.637	19.553	62.127	40.607	-0.178	19.356	32.141	58.503	-0.337	15.544	33.414	35.142	-0.959	16.58	20.252	47.782	-0.281	27.488	30.556	52.345	1.863	23.051	19.037	-0.875	-11.022
	-3.506	26.388	58.145	77.902	0.123	27.198	39.497	70.783	1.292	15.982	37.922	47.766	2.528	12.654	13.807	36.198	3.077	9.746	22.145	42.517	-1.672	11.846	-1.189	38.133	-0.637	19.553	62.127	40.607	-0.178	19.356	32.141	58.503	-0.337	15.544	33.414	35.142	-0.959	16.58	20.252	47.782	-0.281	27.488	30.556	52.345	1.863	23.051	19.037	-0.875	-0.952
	-3.506	26.388	58.145	77.902	2.426	27.198	39.497	70.783	1.292	15.982	37.922	47.766	2.528	12.654	13.807	36.198	3.077	9.746	22.145	42.517	-1.672	11.846	-1.189	38.133	-0.637	19.553	62.127	34.287	-0.178	19.356	32.141	58.503	-0.337	15.544	32.216	35.142	-0.959	16.58	20.252	47.782	-0.281	27.488	30.556	52.345	1.863	23.051	19.037	-0.875	-0.952
	-3.506	26.388	58.145	77.902	2.426	27.198	39.497	70.783	1.292	15.982	37.922	47.766	2.528	12.654	13.807	36.198	3.077	9.746	22.145	42.517	-1.672	11.846	-1.189	38.133	-0.637	19.553	62.127	34.287	-0.178	19.356	32.141	58.503	-0.337	15.544	32.216	35.142	-0.959	16.58	20.252	47.782	-0.281	27.488	30.556	52.345	1.863	23.051	19.037	-0.875	-0.952
	-3.506	26.388	58.145	77.902	2.426	27.198	39.497	70.783	1.292	15.982	37.922	45.946	2.528	12.654	12.483	36.198	8.534	9.746	22.145	42.517	-1.672	11.846	-14.337	38.133	-0.637	19.553	62.127	34.287	-0.178	19.356	32.141	58.503	-0.337	15.544	32.216	35.142	-0.959	16.58	15.175	47.782	-0.281	27.488	30.556	52.345	1.863	23.051	19.037	-0.875	6.374
	-3.506	26.388	58.145	77.902	2.426	27.198	39.497	70.783	-5.241	15.982	38.836	45.946	-0.239	12.654	12.483	36.198	8.534	9.746	22.145	42.517	-1.672	11.846	-14.337	30.72	-0.637	19.553	62.127	34.287	-0.178	19.356	32.141	58.503	-0.337	15.544	32.216	35.142	-0.959	16.58	15.175	47.782	-0.281	27.488	30.556	52.345	1.863	23.051	19.037	-0.875	6.374
	-3.506	26.388	58.145	77.902	2.426	27.198	39.497	70.783	-5.241	15.982	38.836	45.946	-0.239	12.654	12.483	36.198	-6.312	9.746	22.145	42.517	-1.672	11.846	-14.337	30.72	-0.637	19.553	62.127	34.287	-0.178	19.356	32.141	58.503	-0.337	15.544	23.962	35.142	-0.959	16.58	15.175	47.782	-0.281	27.488	30.556	52.345	1.863	23.051	19.037	-0.875	6.374
	-3.506	26.388	58.145	77.902	2.426	27.198	39.497	70.783	-5.241	15.982	41.687	45.946	-0.239	12.654	12.483	36.198	-6.312	9.746	25.659	42.517	-1.672	11.846	-14.337	30.72	-0.637	19.553	60.719	34.287	-0.178	19.356	19.993	58.503	-0.337	15.544	23.962	35.142	-0.959	16.58	15.175	47.782	-0.281	21.065	30.556	52.345	1.863	23.051	19.037	-0.875	6.374
	-3.506	26.388	58.145	77.902	2.426	27.198	39.497	70.783	-5.241	15.982	41.687	45.946	-0.239	12.654	12.483	36.198	-6.312	9.746	25.659	42.517	-1.672	11.846	-14.337	30.72	-0.637	19.553	60.719	34.287	-0.178	19.356	19.993	58.503	-0.337	15.544	23.962	35.142	8.91	16.58	15.175	35.784	-0.281	21.065	30.556	52.345	1.863	23.051	19.037	-0.875	6.374
	-3.506	26.388	58.145	77.902	-5.728	27.198	39.497	70.783	-5.241	15.982	43.421	50.367	-4.669	12.654	11.555	36.198	-6.312	9.746	25.659	42.517	-1.672	11.846	-14.337	30.72	-0.637	19.553	60.719	44.075	-0.178	19.356	19.993	58.503	-2.931	15.544	23.962	35.142	8.91	16.58	19.703	35.784	-0.281	21.065	30.556	52.345	1.863	23.051	19.037	-0.875	1.285
	-3.506	26.388	58.145	77.902	-5.728	27.198	39.497	70.783	-5.241	15.982	43.421	50.367	-4.669	20.799	11.555	36.198	1.824	9.746	40.373	42.517	-1.672	11.846	-14.337	46.63	-0.637	19.553	60.719	44.075	-0.178	19.356	24.104	58.503	-2.931	15.544	23.962	35.142	8.91	16.58	19.703	35.784	-0.281	21.065	30.556	52.345	1.863	23.051	19.037	-0.875	1.285
	-3.506	26.388	58.145	77.902	-5.728	27.198	39.497	70.783	0.22	11.325	43.421	50.367	-4.669	20.799	11.555	36.198	1.824	9.746	40.373	41.547	-1.672	11.846	-14.337	46.63	-0.637	19.553	60.719	44.075	-0.178	19.356	24.104	58.503	-2.931	15.544	23.962	35.142	8.91	16.58	19.703	35.784	-0.281	21.065	30.556	52.345	1.863	23.051	19.037	-0.875	-7.942
	-3.506	26.388	58.145	77.902	7.819	27.198	39.497	70.783	0.22	11.325	43.421	50.367	-4.669	20.799	31.404	36.198	1.824	9.746	40.373	41.547	-1.672	11.846	-14.337	46.63	-0.637	19.553	60.719	44.075	-0.178	18.728	24.104	58.503	-2.931	15.544	23.962	35.142	8.91	16.58	19.703	35.784	-0.281	21.065	30.556	52.345	1.863	23.051	19.037	-0.875	-7.942
	-3.506	26.388	58.145	77.902	7.819	27.198	39.497	70.783	0.22	11.325	43.421	50.367	-4.669	20.799	31.404	36.198	1.824	9.746	40.373	41.547	-1.672	11.846	-14.337	46.63	-0.637	19.553	60.719	44.075	-0.178	18.728	24.104	58.503	-2.931	15.544	23.962	35.142	8.91	16.58	19.703	35.784	-0.281	21.065	30.556	52.345	1.863	28.57	19.037	-0.875	-2.608
	-3.506	26.388	58.145	77.902	7.819	27.198	39.497	70.783	0.22	11.325	33.639	50.367	-4.669	20.799	31.404	36.198	1.824	9.746	40.373	41.547	-1.672	14.23	-14.337	46.63	-0.637	19.553	60.719	44.075	-0.178	18.728	24.104	58.503	-2.931	15.544	23.962	35.142	8.91	16.58	19.703	35.784	-0.281	21.065	30.556	52.345	1.863	28.57	19.037	-0.875	-2.608
	-3.506	20.076	58.145	77.902	7.819	27.198	39.497	70.783	0.22	11.325	33.639	50.367	-4.669	20.799	31.404	36.198	4.329	9.746	40.373	41.547	-1.672	14.23	-14.337	46.63	-0.637	19.553	60.719	44.075	-0.178	12.038	24.104	58.503	-2.931	15.544	23.962	35.142	8.91	16.58	19.703	35.784	-0.281	21.065	30.556	52.345	1.863	23.546	19.037	-0.875	-2.608
	-3.506	20.076	58.145	77.902	7.819	27.198	39.497	70.783	0.22	11.325	33.639	50.367	-4.669	20.799	31.404	36.198	4.329	9.746	40.373	41.547	-1.672	14.23	-14.337	11.067	-0.637	19.553	25.344	44.075	-0.178	12.038	24.104	58.503	-2.931	15.544	23.962	35.142	8.91	16.58	19.703	35.784	-0.281	21.065	30.556	52.345	1.863	23.546	19.037	-0.875	-2.608
	-3.506	20.076	58.145	77.902	7.819	27.198	39.497	70.783	0.22	11.325	23.364	50.367	-4.669	20.799	31.404	36.198	4.329	9.746	40.373	29.59	-1.672	14.23	-14.337	11.067	0.93	19.553	25.344	44.075	2.534	9.075	24.104	58.503	-2.931	15.544	23.962	35.142	3.456	16.58	19.703	35.784	-0.281	21.065	30.556	52.345	1.863	23.546	19.037	-0.875	-2.608
	-3.506	20.076	58.145	77.902	7.819	27.198	39.497	70.783	0.22	11.325	23.364	50.367	-4.669	20.799	31.404	36.198	4.329	9.746	27.863	29.59	-1.672	14.23	-14.337	11.067	0.93	19.553	30.229	44.075	2.534	9.075	24.104	58.503	-2.931	15.544	23.962	35.142	3.456	16.58	19.703	35.784	-0.281	21.065	30.556	52.345	1.863	23.546	19.037	-0.875	-2.608
	-3.506	20.076	58.145	77.902	7.819	27.198	39.497	70.783	0.22	11.325	23.364	50.367	-4.669	20.799	31.404	36.198	4.329	9.746	27.863	29.59	-1.672	14.23	-14.337	11.067	0.93	19.553	30.229	44.075	2.534	14.413	24.104	58.503	-2.931	15.544	23.962	35.142	3.456	16.58	19.703	55.756	-0.281	21.065	30.556	52.345	1.863	22.174	19.037	-0.875	2.18
	-3.506	20.076	58.145	77.902	-4.309	27.198	21.076	70.783	0.22	11.325	23.364	50.367	2.763	20.799	31.404	36.198	4.329	9.746	38.364	29.59	-1.672	14.23	33.237	11.067	0.93	19.553	30.229	44.075	2.534	14.413	24.104	58.503	-2.931	15.544	23.962	35.142	3.456	16.58	19.703	55.756	-0.281	21.065	30.556	52.345	1.863	22.174	19.037	-0.875	2.18
	-3.506	20.076	58.145	77.902	-4.309	27.198	21.076	70.783	0.22	11.325	23.364	50.367	2.763	20.799	31.404	36.198	4.329	9.746	38.364	29.59	-1.672	14.23	33.237	11.067	0.93	19.553	30.229	44.075	2.534	14.413	24.104	58.503	-2.931	15.544	23.962	39.364	3.456	16.58	19.703	55.756	-0.281	21.065	26.311	52.345	1.863	22.174	4.814	-0.875	2.18
	-3.506	20.076	58.145	77.902	-4.309	27.198	22.786	70.783	0.22	11.325	23.364	50.367	1.256	16.724	31.404	36.198	-7.157	9.746	38.364	29.59	-1.672	14.23	33.237	11.067	0.93	19.553	30.229	44.075	2.534	14.413	24.104	58.503	-2.931	15.544	23.962	39.364	-5.619	16.58	19.703	55.756	-0.281	21.065	26.311	52.345	1.863	22.174	4.814	-0.875	2.18
	-3.506	20.076	58.145	77.902	-4.309	27.198	22.786	70.783	0.22	11.325	23.364	50.367	1.256	16.724	31.404	36.198	-7.157	10.906	38.364	29.59	-1.672	14.23	33.237	11.067	0.93	19.553	30.229	44.075	2.534	14.413	24.104	58.503	-2.931	15.544	23.962	38.782	-5.619	16.58	19.703	55.756	-0.281	21.065	26.311	52.345	1.863	22.174	4.814	-0.875	2.18
	-3.506	20.076	58.145	77.902	-4.309	27.198	22.786	70.783	0.22	11.325	23.364	50.367	1.256	16.724	31.404	36.198	-7.157	10.906	39.365	43.638	-1.672	14.23	33.237	11.067	0.93	19.553	30.229	44.075	2.534	14.413	24.104	58.503	-2.931	15.544	23.962	38.782	-5.619	16.58	19.703	55.756	-0.281	21.065	26.311	52.345	1.863	22.174	18.433	-0.875	2.18
	-3.506	20.076	58.145	77.902	-4.309	27.198	22.786	70.783	0.22	11.325	23.364	50.367	1.256	16.724	31.404	36.198	-7.157	10.906	39.365	43.638	-1.672	14.23	33.237	11.067	0.93	19.553	30.229	44.075	5.543	14.413	24.104	58.503	-2.931	15.544	23.962	43.204	-4.784	16.58	19.703	55.756	-0.281	21.065	26.311	52.345	1.863	22.174	18.433	-0.875	2.18
	-3.506	20.076	58.145	77.902	-4.309	27.198	22.786	70.783	0.22	11.325	23.364	50.367	1.256	16.724	31.404	36.198	-7.157	10.906	39.365	43.638	-1.672	14.23	33.237	11.067	0.93	19.553	30.229	44.075	5.543	14.413	24.104	58.503	-2.931	15.544	23.962	43.204	-4.784	16.58	19.703	55.756	-0.281	21.065	26.311	52.345	1.863	22.174	18.433	-0.875	2.18
	-3.506	20.076	58.145	77.902	-4.309	27.198	23.03	70.783	0.22	11.325	23.364	50.367	1.256	16.724	31.404	36.198	5.655	10.906	39.365	43.638	-1.672	14.23	33.237	11.067	0.93	19.553	30.229	36.722	-5.05	14.413	24.104	58.503	-2.931	15.544	23.962	40.981	-4.784	16.58	13.481	55.756	-0.281	21.065	26.311	52.345	1.863	22.174	18.433	-0.875	2.18
	-3.506	20.076	58.145	77.902	-4.309	27.198	23.03	70.783	0.22	11.325	23.364	50.367	1.256	16.724	31.404	36.198	5.655	10.906	39.365	43.638	-1.672	14.23	33.237	11.067	0.93	19.553	30.229	36.722	-5.05	14.413	24.104	58.503	-2.931	15.544	23.962	40.981	-4.784	16.58	13.481	55.756	-0.281	21.065	26.311	52.345	1.863	22.174	18.433	-0.875	2.18
	-3.506	20.076	58.145	77.902	1.572	27.198	23.03	70.783	0.22	11.325	23.364	50.367	1.256	16.724	31.404	36.198	5.655	10.906	39.365	43.638	-1.672	14.23	33.237	11.067	0.93	19.553	30.229	36.722	-7.213	14.413	24.104	58.503	-2.931	15.544	23.962	40.981	-4.784	16.58	26.446	55.756	-0.281	21.065	26.311	52.345	1.863	22.174	18.433	-0.875	2.18
	-3.506	20.076	58.145	77.902	1.572	27.198	38.296	70.783	0.22	11.325	23.364	50.367	1.256	16.724	31.404	36.198	5.655	18.206	39.365	43.638	-1.672	14.23	33.237	11.067	0.93	19.553	30.229	36.722	-7.213	14.413	24.104	58.503	-2.931	15.544	23.962	40.981	-4.784	16.58	26.446	55.756	-0.281	21.065	26.311	52.345	1.863	22.174	18.433	-0.875	2.18
	-3.506	20.076	58.145	77.902	1.572	27.198	38.296	70.783	0.22	11.325	23.364	50.367	1.256	16.724	31.404	36.198	5.655	18.206	39.365	43.638	-1.672	14.23	33.237	12.653	0.93	19.553	30.229	36.722	-7.213	14.413	24.104	58.503	-2.931	15.544	23.962	40.981	-4.784	16.58	26.446	55.756	-0.281	21.065	26.311	52.345	1.863	22.174	18.433	-0.875	2.18
	-3.506	20.076	58.145	77.902	-1.123	27.198	38.296	70.783	0.22	11.325	23.364	50.367	1.256	16.724	31.404	36.198	5.655	18.206	39.365	43.638	-1.672	14.23	33.237	12.653	0.93	19.553	30.229	45.268	-7.213	14.413	24.104	58.503	-2.931	15.544	23.962	40.981	-4.784	16.58	26.446	55.756	-0.281	21.065	26.311	52.345	1.863	22.174	18.433	-0.875	2.18
	-3.506	20.076	58.145	77.902	-1.123	27.198	38.296	70.783	0.22	11.325	23.364	50.367	1.256	16.724	31.404	36.198	5.655	12.123	39.365	43.638	-1.672	14.23	33.237	12.653	0.93	19.553	30.229	45.268	-7.213	14.413	24.104	58.503	-2.931	15.544	23.962	40.981	-4.784	16.58	23.957	50.013	-0.281	21.065	26.311	52.345	1.863	22.174	18.433	-0.875	2.18
	-3.506	20.076	58.145	77.902	-1.123	27.198	47.744	70.783	0.22	11.325	23.364	50.367	1.256	16.724	31.404	36.198	5.655	12.123	39.365	43.638	-1.672	14.23	33.237	12.653	0.93	19.553	30.229	45.268	-7.213	14.413	32.839	58.503	-2.931	15.544	23.962	40.981	-4.784	16.58	23.957	50.013	-0.281	21.065	26.311	52.345	1.863	22.174	18.433	-0.875	2.18
	-3.506	20.076	58.145	77.902	-1.123	27.198	47.744	70.783	0.22	11.325	23.364	56.592	1.256	16.724	31.404	36.198	5.655	12.123	39.365	43.638	-1.672	14.23	33.237	12.653	0.93	19.553	30.229	45.268	5.684	14.413	32.839	58.503	-2.931	15.544	23.962	40.981	-4.784	16.58	26.291	43.633	-0.281	21.065	26.311	52.345	1.863	22.174	18.433	-0.875	2.009
	-3.506	20.076	58.145	77.902	-3.925	27.198	47.744	70.783	0.22	11.325	34.264	56.592	1.256	16.724	31.404	36.198	5.655	12.123	39.365	43.638	-1.672	14.23	33.237	9.688	0.93	22.796	30.229	45.268	5.684	14.413	32.839	58.503	-2.931	13.994	23.962	40.981	-4.784	16.58	26.291	43.633	-0.281	21.065	26.311	52.345	1.863	22.174	18.433	-0.875	2.009
	-3.506	20.076	58.145	77.902	-3.925	27.198	47.744	70.783	0.22	11.325	34.264	52.23	1.256	16.724	31.404	36.198	5.655	12.123	39.365	30.153	-1.672	14.23	33.237	9.688	0.93	22.796	30.229	45.268	5.684	14.413	31.35	58.503	-2.931	13.994	23.962	40.981	-5.957	16.58	26.291	43.633	-0.281	21.065	26.311	52.345	1.863	22.174	18.433	-0.875	2.009
	-3.506	20.076	58.145	77.902	-3.925	27.198	47.393	70.783	0.22	11.325	34.264	52.23	1.256	16.724	31.404	36.198	5.655	12.123	39.365	30.153	-1.672	14.23	33.237	9.688	0.93	22.796	30.229	45.268	5.684	14.413	31.35	58.503	-2.931	13.994	11.803	40.981	-5.957	16.58	24.245	43.633	-0.281	7.435	26.311	52.345	0.808	22.174	18.433	-0.875	2.009
	-3.506	20.076	58.145	77.902	-3.925	27.198	47.393	70.783	0.22	11.325	34.264	55.033	1.256	16.724	31.404	36.198	5.655	12.123	39.365	33.31	-1.672	14.23	33.237	9.688	0.93	22.796	30.229	45.268	5.684	14.413	31.35	58.503	-2.931	13.994	11.803	40.981	-5.957	16.58	24.245	43.633	9.471	7.435	26.311	52.345	0.808	22.174	18.433	-0.875	2.009
	-3.506	20.076	58.145	77.902	-3.925	27.198	47.393	70.783	0.22	11.325	34.264	55.033	1.256	16.724	31.404	36.198	-10.308	12.123	39.365	33.31	-1.672	14.23	33.237	9.688	0.93	22.796	30.229	45.268	5.684	14.413	31.35	58.503	-2.931	13.994	11.803	40.981	-5.957	16.58	24.245	43.633	9.471	7.435	26.311	52.345	0.808	22.174	18.433	-0.875	2.009
	-6.152	20.076	58.145	77.902	-3.925	27.198	37.14	55.768	0.22	11.325	34.264	48.583	1.256	16.724	31.404	36.198	-10.308	12.123	39.365	33.31	-1.672	14.23	33.237	9.688	0.93	22.796	12.17	45.268	5.684	14.413	31.35	58.503	-2.931	21.323	11.803	40.981	-4.27	16.58	24.245	43.633	-1.885	7.435	26.311	52.345	0.808	22.174	18.433	-0.875	-0.392
	-6.152	20.076	58.145	77.902	-3.925	27.198	37.14	55.768	0.22	11.325	34.264	48.583	1.256	16.724	31.404	36.198	-10.308	12.123	39.365	33.31	-1.672	14.23	33.237	9.688	0.93	22.796	12.17	45.268	-6.222	14.413	31.35	58.503	-2.931	21.323	11.803	40.981	-4.27	16.58	23.069	43.633	-1.885	7.435	26.311	52.345	0.808	22.174	18.433	-0.875	-0.392
	-6.152	20.076	58.145	77.902	-3.925	27.198	47.354	55.768	0.22	11.325	34.264	48.583	1.256	16.724	31.404	36.198	-10.308	12.123	39.365	33.31	-1.672	14.23	33.237	9.156	0.93	22.796	23.316	45.268	-6.222	14.413	31.35	58.503	-2.931	21.323	11.803	40.981	-4.27	16.58	23.069	43.633	-1.885	17.707	26.311	52.345	0.808	22.174	18.433	-0.875	-0.392
	-6.152	20.076	58.145	45.945	-3.925	27.198	47.354	55.768	0.22	11.325	34.264	48.583	-6.7	16.724	31.404	36.198	-10.308	12.123	39.365	33.31	-1.672	14.23	33.237	9.156	0.93	22.796	23.316	45.268	8.674	10.982	31.35	58.503	-2.931	21.323	11.803	51.029	4.924	16.58	23.069	43.633	-1.885	17.707	26.311	52.345	0.808	22.174	12.737	-0.875	-0.392
	-6.152	20.076	58.744	45.945	-3.925	27.198	38.749	55.768	0.22	11.325	34.264	48.583	-6.7	16.724	31.404	36.198	-3.82	12.123	39.365	33.31	-1.672	14.23	33.237	9.156	0.93	22.796	23.316	45.268	8.674	10.982	31.35	58.503	-3.247	21.323	11.803	51.029	4.924	16.58	23.069	25.621	-1.885	17.707	26.311	52.345	0.808	22.174	12.737	-0.875	-0.392
	-6.152	20.076	58.744	35.073	-3.925	27.198	38.749	55.768	0.22	11.325	34.264	48.583	-6.7	14.326	31.404	36.198	-3.82	12.123	39.365	33.31	-1.672	14.23	33.237	9.156	0.93	22.796	23.316	45.268	8.674	10.982	31.35	28.32	-3.247	21.323	11.803	28.871	4.924	16.58	28.919	25.621	-1.885	17.707	26.311	52.345	0.808	22.174	12.737	-0.875	-0.392
	-6.152	20.076	58.744	35.073	-3.925	27.198	38.749	55.768	0.22	11.325	34.264	48.583	3.86	14.326	31.404	36.198	-3.82	12.123	39.365	33.31	-1.672	14.23	33.237	9.156	0.93	22.796	23.316	45.268	-2.418	10.982	30.99	28.32	-3.247	21.323	11.803	28.871	4.924	16.58	28.919	25.621	-1.885	17.707	26.311	52.345	0.808	22.174	12.737	-0.875	-0.392
	-6.152	20.076	58.744	35.073	-3.925	27.198	52.642	55.768	0.22	11.325	34.264	48.583	3.86	14.326	31.404	36.198	-3.82	12.123	32.845	33.31	-1.672	14.23	33.237	9.156	0.93	22.796	23.316	45.268	-6.382	10.982	30.99	28.32	-3.247	21.323	23.002	28.871	2.309	16.58	28.919	25.621	-1.885	17.707	26.311	52.345	0.808	22.174	12.737	-0.875	2.365
	-6.152	20.076	58.744	52.059	-0.608	27.198	52.642	55.768	0.22	11.325	34.264	48.583	3.86	14.326	31.404	36.198	-3.82	12.123	32.845	33.31	-1.672	14.23	33.237	9.156	0.93	22.796	23.316	45.268	-6.382	10.982	30.99	28.32	-3.247	21.323	23.002	29.227	2.309	16.58	28.919	25.621	-1.885	17.707	26.311	52.345	0.808	22.174	30.313	-0.875	2.365
	-6.152	20.076	58.744	52.059	-0.608	27.198	52.642	55.768	0.22	11.325	34.264	48.583	3.86	14.326	31.404	36.198	-3.82	12.123	32.845	33.31	-1.672	14.23	33.237	9.156	0.93	22.796	23.316	45.268	-6.382	10.982	35.649	28.32	-3.247	21.323	23.002	29.227	2.309	16.58	28.919	25.621	-1.885	17.707	26.311	52.345	0.808	22.174	30.313	-0.875	2.365
	-6.152	20.076	58.744	34.358	-0.608	27.198	52.642	55.768	0.22	11.325	34.264	48.583	3.86	14.326	31.404	36.198	-3.82	12.123	32.845	33.31	-1.672	14.23	33.237	9.156	0.93	22.796	23.316	45.268	-6.382	13.56	35.649	28.32	-3.247	21.323	23.002	29.227	2.309	16.58	28.919	30.525	-1.812	17.707	26.311	52.345	0.808	22.174	17.904	-0.875	2.365
	-6.152	20.076	58.744	34.358	-0.608	26.69	52.642	55.768	0.22	11.325	34.264	48.583	3.86	14.326	31.404	36.198	-3.82	12.123	32.845	33.31	-1.672	14.23	33.237	9.156	0.93	22.796	23.316	45.268	-6.382	13.56	35.649	28.32	-3.247	21.323	23.002	29.227	2.309	16.58	28.919	30.525	-1.812	17.707	26.311	52.345	0.808	22.174	17.904	-0.875	2.365
	-6.152	20.076	58.744	34.358	-0.608	26.69	52.642	55.768	0.22	11.325	34.264	48.583	3.86	14.326	31.404	36.198	-3.82	12.123	32.845	33.31	-1.672	14.23	33.237	9.156	0.93	22.796	23.316	45.268	4.712	13.56	35.649	28.32	-3.247	21.323	23.002	29.227	2.309	16.58	28.919	30.525	-1.812	17.707	26.311	52.345	0.808	22.174	17.904	-0.875	2.365
	-6.152	20.076	58.744	34.358	-0.608	26.69	52.642	55.768	0.22	11.325	34.264	48.583	3.86	23.715	31.404	36.198	-3.82	12.123	32.845	34.164	-1.672	14.23	33.237	9.156	0.93	22.796	23.316	45.268	4.712	13.56	35.649	28.32	-3.247	21.323	23.002	29.227	2.309	16.58	28.919	30.525	-1.812	17.707	26.311	52.345	0.808	22.174	22.398	-0.875	2.365
	-6.152	20.076	58.744	27.125	-6.439	26.69	52.642	55.768	0.22	11.325	34.264	48.583	3.86	23.715	31.404	36.198	-3.82	12.123	38.171	34.164	-1.672	14.23	33.237	9.156	0.93	22.796	23.316	45.268	4.712	13.56	35.649	28.32	-0.986	21.323	23.002	29.227	2.309	16.58	28.919	30.525	-1.812	17.707	26.311	52.604	0.808	22.174	22.398	-0.875	2.365
	-6.152	20.076	58.744	27.125	-6.439	26.69	48.622	55.768	0.22	11.325	30.853	48.583	3.86	23.715	31.404	36.198	-3.82	12.123	38.171	34.164	-1.672	14.23	33.237	9.156	0.93	22.796	23.316	45.268	4.712	17.651	35.649	28.32	-0.986	21.323	23.002	29.227	2.309	16.58	28.919	30.525	-1.812	17.707	26.311	52.604	0.808	22.174	22.398	-0.875	2.365
	-6.152	20.076	58.744	27.125	-6.439	26.69	48.622	55.768	0.22	11.325	30.853	48.583	3.86	13.547	31.404	36.198	-3.82	12.123	38.171	34.164	-1.672	14.23	33.237	9.156	0.93	22.796	28.127	45.268	4.712	17.651	35.649	28.32	-0.986	21.323	23.002	29.227	2.309	16.58	28.919	30.525	-1.812	17.707	26.311	52.604	0.808	22.174	22.398	-0.875	-0.854
	-6.152	20.076	58.744	27.125	-6.439	26.69	48.622	55.768	0.22	11.325	30.853	48.583	3.86	13.547	31.404	36.198	-3.82	12.123	38.171	35.528	-1.672	14.23	33.237	9.156	0.93	22.796	28.127	45.268	-2.88	17.651	35.649	28.32	-0.986	21.323	23.002	29.227	2.309	16.58	28.919	32.871	-1.812	29.256	26.311	52.604	0.808	22.174	26.101	-0.875	-0.854
	-6.152	20.076	58.744	27.125	8.401	26.69	48.622	55.768	0.22	11.325	30.853	48.583	3.86	13.547	31.404	36.198	-3.82	12.123	38.171	35.528	-1.672	14.23	33.237	9.156	0.93	22.796	28.127	45.268	-2.88	17.651	35.649	28.32	-0.986	21.323	23.002	29.227	2.309	16.58	28.919	32.871	-1.812	29.256	26.311	52.604	0.808	22.174	26.101	-0.875	-0.854
	-6.152	20.076	58.744	27.125	8.401	26.69	48.622	55.768	0.22	11.325	30.853	48.583	3.86	5.218	31.404	36.198	1.595	12.123	38.171	37.486	-1.672	14.23	33.237	9.156	0.93	22.796	28.127	45.268	-2.88	17.651	48.239	28.32	-3.193	21.323	23.002	29.227	2.309	16.58	28.919	33.653	-1.812	15.936	26.311	52.604	0.808	22.174	26.101	-0.875	-0.854
	-6.152	20.076	60.791	27.125	0.951	26.69	52.123	55.768	0.22	11.325	30.853	48.583	3.86	5.218	31.404	36.198	1.595	12.123	38.171	37.486	-1.672	14.23	33.237	9.156	0.93	22.796	28.127	45.268	-2.88	17.651	48.239	37.19	-3.193	21.323	23.002	29.227	2.309	16.58	28.919	33.653	-1.812	15.936	26.311	52.604	0.808	22.174	26.101	-0.875	-0.854
	-6.152	20.076	60.791	27.125	0.951	26.69	52.123	55.768	0.22	11.325	30.853	48.583	3.86	8.622	31.404	36.198	1.595	12.123	38.171	37.486	-1.672	14.23	33.237	9.156	0.93	22.796	28.127	45.268	-2.88	5.977	35.993	37.19	-3.193	21.323	23.002	54.637	2.309	16.58	27.724	33.653	-1.812	15.936	26.311	52.604	0.808	22.174	26.101	-0.875	-0.854
	-6.152	20.076	60.791	27.125	0.951	26.69	52.123	40.156	0.22	11.325	30.853	48.583	3.86	8.622	31.404	36.198	1.595	12.123	38.171	37.486	-1.672	14.23	33.237	9.156	0.93	22.796	28.127	45.268	-2.88	5.977	35.993	37.19	3.05	21.323	23.002	54.637	2.309	16.58	27.724	33.653	-1.812	15.936	26.311	52.604	0.808	22.174	26.101	-0.875	-0.854
	-6.152	20.076	60.791	27.125	14.429	26.69	52.123	40.156	0.22	11.325	30.853	48.583	3.86	10.897	31.404	36.198	1.595	12.123	38.171	37.486	-1.672	14.23	33.237	9.156	0.93	22.796	28.127	45.268	-2.88	5.977	35.993	37.19	3.05	21.323	23.002	54.637	2.309	16.58	27.724	39.896	-1.812	15.936	26.311	52.604	0.808	22.174	20.299	-0.875	-0.854
	-6.152	20.076	60.791	27.125	14.429	26.69	41.254	58.548	0.22	11.325	30.853	48.583	3.86	10.897	31.404	36.198	1.595	12.123	38.171	37.486	-1.672	14.23	33.237	9.156	0.93	22.796	28.127	45.268	-2.88	5.977	34.569	37.19	3.05	21.323	23.002	54.637	2.309	16.58	27.724	39.896	-1.812	15.936	26.311	52.604	0.808	19.908	20.299	-0.875	-0.854
	-6.152	20.076	60.791	27.125	14.429	28.953	41.254	58.548	0.22	11.325	30.853	48.583	3.86	10.897	31.404	36.198	1.595	12.123	38.171	37.486	-1.672	14.23	33.237	9.156	0.93	22.796	11.725	45.268	-2.88	5.977	34.569	37.19	3.05	21.323	23.002	54.637	2.309	16.58	27.724	39.896	-1.812	15.936	26.311	52.604	0.808	19.908	20.299	-0.875	-0.854
	-6.152	20.076	60.791	27.125	14.429	28.953	41.254	58.548	0.22	11.325	30.853	48.583	3.86	10.897	31.404	36.198	1.595	12.123	38.171	37.486	-1.672	14.23	33.237	9.156	0.93	22.796	11.725	45.268	-2.88	5.977	34.569	37.19	3.05	21.323	23.002	48.75	2.309	16.58	27.724	39.896	-1.812	15.936	26.311	56.191	0.808	19.908	20.299	-0.875	-0.854
	-6.152	20.076	60.791	27.125	14.429	28.953	41.254	36.361	0.22	11.325	30.853	48.583	3.86	10.897	31.404	36.198	1.595	12.123	38.171	37.486	-1.672	14.23	33.237	9.156	0.93	22.796	12.833	77.685	-2.88	5.977	34.569	37.19	3.05	21.323	23.002	48.75	2.309	16.58	27.724	39.896	-1.812	15.936	26.311	56.191	0.808	14.948	20.299	-0.875	-0.854
	-11.608	20.076	60.791	27.125	14.429	28.953	41.254	36.361	0.22	11.325	30.853	48.583	3.86	10.897	31.404	36.198	1.595	12.123	38.171	37.486	-1.672	14.23	27.98	9.156	0.93	22.796	12.833	77.685	-2.88	5.977	34.569	37.19	3.05	21.323	22.005	48.75	2.309	16.58	27.724	39.896	-1.812	15.936	26.311	56.191	0.808	14.948	20.299	-0.875	-0.854
	-11.608	3.815	63.437	25.5	14.429	28.953	41.254	34.285	0.22	11.325	30.853	48.583	3.86	10.897	31.404	36.198	1.595	12.123	38.171	37.486	-1.672	14.23	27.98	9.156	0.93	22.796	12.833	77.685	-2.88	5.977	24.719	37.19	3.05	21.323	22.005	48.75	2.309	16.58	27.724	39.896	-1.812	15.936	26.311	56.191	0.808	14.948	5.143	-0.875	-0.854
	-11.608	3.815	46.251	25.5	14.429	28.953	41.254	34.285	0.22	11.325	30.853	48.583	3.86	9.256	31.404	36.198	1.595	12.123	38.171	37.486	-1.672	14.23	27.98	9.156	0.93	22.796	12.833	77.685	-2.88	5.977	24.719	37.19	3.05	21.323	23.248	30.562	-13.931	16.58	27.724	39.896	-1.812	15.936	26.311	56.191	-2.953	14.948	5.143	-0.875	-0.854
	-11.608	3.815	46.251	25.5	14.429	28.953	41.254	44.53	0.22	11.325	30.853	48.583	3.86	9.256	31.404	36.198	1.595	12.123	38.171	31.335	-1.672	14.23	49.047	13.463	0.93	22.796	12.833	75.934	14.944	5.977	24.719	37.19	3.05	21.323	23.248	30.562	-13.931	16.58	24.027	39.896	-1.812	15.936	26.311	42.939	-2.953	14.948	5.143	-0.875	-0.854
	-11.608	3.815	31.882	25.5	-3.929	28.953	41.254	44.53	0.22	11.325	30.853	36.259	3.86	9.256	31.404	36.198	1.595	12.123	38.171	31.335	-1.672	14.23	49.047	13.463	0.93	22.796	12.833	75.934	14.944	5.977	24.719	37.19	3.05	21.323	23.248	30.562	-13.931	16.58	24.027	39.896	-1.812	15.936	26.311	42.939	-2.953	14.948	37.363	-0.875	-0.854
	-11.608	17.24	31.882	29.58	-3.929	26.462	41.254	44.53	0.22	11.325	30.853	36.259	3.86	9.256	31.404	36.198	1.595	12.123	38.171	31.335	-1.672	14.23	49.047	13.463	0.446	22.796	12.833	75.934	14.944	5.977	24.719	37.19	3.05	21.323	23.248	30.562	-4.803	16.58	24.027	39.896	-1.812	15.936	26.311	42.939	-2.953	14.948	37.363	-0.875	-0.854
	-11.608	17.24	31.882	29.58	-3.929	26.462	41.254	43.314	0.22	11.325	30.853	36.259	3.86	9.256	31.404	36.198	1.595	12.123	38.171	31.335	-1.672	14.23	49.047	13.463	0.446	22.796	12.833	75.934	6.293	5.977	24.719	37.19	3.05	21.323	23.248	30.562	-4.803	16.58	24.027	39.896	-1.812	15.936	26.311	42.939	-2.953	14.948	37.363	-0.875	-0.854
	-11.608	17.24	12.72	29.58	-3.929	26.462	41.254	43.314	0.22	11.325	17.975	36.117	3.86	9.256	30.421	36.198	1.595	12.123	38.171	31.335	-1.672	14.23	49.047	13.463	0.446	22.796	18.561	75.934	6.293	5.977	31.197	37.19	3.05	21.323	23.248	30.562	-4.803	16.58	24.027	39.896	-1.812	15.936	26.311	42.939	-2.953	14.948	35.129	-0.875	-0.854
	-11.608	17.24	12.72	29.58	-13.714	26.462	41.254	43.314	0.22	11.325	17.975	36.117	3.86	10.521	30.421	36.198	1.595	12.123	38.171	31.335	-1.672	14.23	41.624	13.463	0.446	22.796	18.561	75.934	4.869	5.977	31.197	37.19	3.05	21.323	23.248	30.562	-4.803	16.58	24.027	39.896	-1.812	15.936	26.311	42.939	-2.953	14.948	35.129	-0.875	-0.854
	-11.608	17.24	12.72	29.58	-13.714	26.462	41.254	44.994	0.22	11.325	17.975	36.117	3.86	10.521	30.421	36.198	1.595	12.123	38.171	31.335	-1.672	14.23	41.624	13.463	0.446	22.796	18.561	75.934	4.869	5.977	31.197	37.19	3.05	21.323	23.248	53.087	-3.685	16.58	24.027	39.896	-1.812	15.936	26.311	42.939	-2.953	14.948	35.129	-0.875	-0.854
	-21.6	17.24	12.72	29.58	4.829	26.462	41.254	44.994	0.22	11.325	17.975	36.117	3.86	10.521	30.421	36.198	1.595	12.123	38.171	31.335	-1.672	14.23	41.624	13.463	0.446	22.796	18.561	75.934	4.869	5.977	31.197	37.19	3.05	21.323	35.702	53.087	-3.685	21.609	24.027	39.896	-1.812	17.163	26.311	42.939	-2.953	14.948	35.129	-0.875	-0.854
	-21.6	17.24	12.72	29.58	4.829	26.462	41.254	44.994	0.22	11.325	17.975	36.117	3.86	18.814	30.421	36.198	1.595	12.123	38.171	30.375	-1.672	14.23	41.624	15.71	0.446	22.796	18.561	75.934	4.869	5.977	31.197	37.19	3.05	22.085	35.702	53.087	-3.685	21.609	24.027	39.896	-1.812	17.163	26.311	42.939	0.268	14.948	35.129	-0.875	-0.854
	-0.809	16.019	12.72	29.58	4.829	26.462	41.254	28.261	0.22	11.325	17.975	36.117	3.86	18.814	30.421	36.198	3.663	12.123	38.171	30.375	-1.672	14.23	41.624	15.71	0.446	22.796	26.55	75.934	4.869	5.977	31.197	37.19	3.05	22.085	35.702	53.087	-3.432	21.609	24.027	39.896	-1.812	17.163	26.311	44.708	0.268	14.948	35.129	-0.875	-0.854
	-0.809	16.019	12.72	29.58	13.792	26.462	41.254	28.261	0.22	11.325	17.975	41.844	3.86	18.814	39.957	36.198	3.663	12.123	38.171	30.375	-1.672	14.23	41.624	15.71	0.446	22.796	26.55	75.934	-17.928	5.977	31.197	37.19	3.05	22.085	35.702	53.087	-3.432	21.609	24.027	39.896	-1.226	17.163	26.311	44.708	0.268	14.948	35.129	-0.875	-0.854
	-0.809	16.019	12.72	29.58	13.792	26.462	43.959	28.261	0.22	22.832	17.975	41.844	3.86	18.814	39.957	36.198	3.663	12.123	38.171	28.576	-1.672	14.23	41.624	37.223	0.446	22.796	26.55	75.934	-17.928	5.977	31.197	37.19	3.05	22.085	35.702	53.087	-3.432	21.609	24.027	39.896	-1.226	17.163	26.311	44.708	0.268	14.948	35.129	-0.875	-0.854
	-0.809	16.019	28.355	29.58	13.792	26.462	43.959	28.261	0.22	22.832	17.975	41.844	3.86	18.814	39.957	36.198	3.663	12.123	38.171	28.576	-1.672	14.23	41.624	37.223	0.446	22.796	14.071	75.934	-0.256	5.977	37.102	37.19	3.05	10.472	40.42	53.087	-3.432	21.609	24.027	38.085	-1.226	30.022	26.311	42.403	0.268	14.948	35.129	-0.875	-0.854
	-0.809	16.019	28.355	29.58	13.792	26.462	43.959	30.752	0.22	20.789	17.975	39.839	3.86	18.814	39.957	36.198	3.663	12.123	38.171	28.576	-1.672	14.23	41.624	37.223	0.446	22.796	14.071	75.934	-0.256	6.505	37.102	37.19	3.05	10.472	30.363	53.087	-3.432	21.609	24.027	38.085	-1.226	30.022	26.311	42.403	0.268	14.948	35.129	-0.875	-0.854
	-0.809	16.019	28.355	29.58	-7.361	26.462	43.959	30.752	0.22	20.789	27.451	39.839	3.86	18.814	39.957	36.198	3.663	12.123	38.171	28.576	-1.672	14.23	41.624	37.223	0.446	22.796	14.071	75.934	-0.256	6.505	37.102	37.19	3.05	10.472	30.363	46.476	-3.432	21.609	24.027	38.085	-1.226	30.022	27.518	42.403	0.268	19.35	35.129	-0.875	-0.854
	-0.809	16.019	28.355	29.58	-7.361	26.462	43.959	39.797	0.22	20.789	27.451	39.839	3.86	18.814	39.957	36.198	9.537	12.123	38.171	36.113	-1.672	14.23	41.624	37.223	0.446	22.796	14.071	75.934	-0.256	6.505	37.102	25.902	3.05	10.472	30.363	46.476	3.632	21.609	24.027	38.085	-1.226	30.022	27.518	42.403	0.268	19.35	35.129	-0.875	-0.854
	-0.809	16.019	28.355	29.58	-7.361	26.462	43.959	39.797	0.22	20.789	27.451	39.839	3.86	18.814	39.957	36.198	9.537	12.123	38.171	36.113	-1.672	14.23	41.624	37.223	0.446	22.796	14.071	75.062	-0.256	6.505	35.322	25.902	3.05	10.472	30.363	46.476	3.632	21.609	24.027	38.085	-1.226	30.022	27.518	42.403	0.268	19.35	35.129	-0.875	-0.854
	-0.809	16.019	28.355	29.58	-7.361	26.462	43.959	39.797	0.22	20.789	27.451	39.839	3.86	18.814	39.957	36.198	9.537	12.123	38.171	36.113	-1.672	14.23	41.624	37.223	0.446	22.796	14.071	75.062	-0.256	18.745	35.322	25.902	3.05	10.098	30.363	46.476	3.632	21.609	14.668	38.085	-1.226	28.247	27.518	42.403	0.268	19.35	35.129	-0.875	-0.854
	-0.809	15.055	28.355	29.58	-7.361	26.462	52.118	39.797	0.22	20.789	21.237	39.839	3.86	18.814	25.763	36.198	-4.249	12.123	38.171	36.113	-1.672	14.23	41.624	37.223	0.446	22.796	21.911	75.062	-0.256	18.745	35.322	25.902	3.05	10.098	30.363	46.476	3.632	21.609	14.668	38.085	-1.226	28.247	27.518	42.403	0.268	19.35	35.129	-0.875	-0.854
	-0.809	15.055	28.355	26.797	-7.361	26.462	52.118	37.171	0.22	20.789	21.237	39.839	3.86	18.814	25.763	36.198	-4.249	12.123	38.171	37.101	-1.672	14.23	41.624	37.223	0.446	35.983	21.911	75.062	-0.256	19.544	35.322	25.902	3.05	10.098	30.363	46.476	3.632	21.609	14.668	34.877	-1.226	28.247	27.518	42.403	0.268	19.35	35.129	-0.875	-0.854
	-0.809	15.055	28.355	26.797	-7.361	26.462	52.118	37.171	0.22	20.789	21.237	39.839	3.86	18.814	25.763	36.198	-3.616	12.123	38.171	37.101	-1.672	14.23	41.624	37.223	0.446	35.983	21.911	29.337	-0.256	19.544	35.322	25.902	3.05	10.098	30.363	46.476	3.632	21.609	14.668	34.877	-1.226	28.247	27.518	42.403	0.268	19.35	35.129	-0.875	-0.854
	-0.809	24.187	6.583	26.797	-7.361	26.462	50.805	37.171	0.22	20.789	21.237	37.297	3.86	18.814	25.763	36.198	-3.616	12.123	38.171	37.101	3.971	14.23	33.495	37.223	0.749	35.983	21.911	29.337	-0.256	19.544	35.322	35.066	3.05	10.098	30.363	46.476	3.632	21.609	28.311	34.877	-1.226	28.247	27.518	42.403	0.268	19.35	35.129	-0.875	-0.854
	-0.809	24.187	6.583	26.797	-7.361	26.462	50.805	37.171	0.22	20.789	21.237	37.297	3.86	18.814	34.992	36.198	-3.616	12.123	38.171	37.101	3.971	14.23	33.495	37.223	0.749	35.983	21.911	29.337	-0.256	19.544	35.322	35.066	3.05	10.098	30.363	46.476	3.632	21.609	28.311	34.877	-1.226	28.247	27.518	42.403	0.268	19.35	35.129	-0.875	-0.854
	-0.809	24.187	6.583	26.797	-7.361	26.462	50.805	37.171	0.22	20.789	21.237	37.297	3.86	18.814	34.992	36.198	-3.616	12.123	38.171	37.101	3.971	14.23	33.495	37.223	0.749	35.983	35.149	29.337	-0.256	19.544	35.322	47.783	3.05	10.098	30.363	46.476	3.632	21.609	28.311	34.877	-1.226	28.247	27.518	42.403	0.268	19.493	35.129	-0.875	-0.854
	-0.809	23.127	6.583	26.797	-7.361	26.462	23.597	37.171	0.22	21.828	21.237	68.359	3.86	18.814	29.017	36.198	-3.616	12.123	38.171	37.101	3.971	14.23	33.495	37.223	0.749	17.079	35.149	29.337	-0.256	19.544	35.322	47.783	3.05	10.098	30.363	46.476	3.632	21.609	28.311	34.877	-1.226	28.247	27.518	42.403	0.268	19.493	35.129	-0.875	-0.854
	-0.809	23.127	16.859	26.797	-7.361	26.462	23.597	37.171	0.22	21.828	21.237	68.359	3.86	18.814	29.017	36.198	1.167	12.123	38.171	37.101	3.971	14.23	22.925	37.223	0.749	17.079	35.149	29.337	-0.256	19.544	35.322	47.783	3.05	10.098	30.363	46.476	3.632	21.609	17.138	34.877	-1.226	28.247	27.518	42.403	0.268	19.493	35.129	-0.875	-0.854
	-0.809	10.017	16.859	26.797	-7.361	26.462	23.597	28.336	0.22	21.828	21.237	47.434	3.86	18.814	29.017	36.198	1.167	12.123	38.171	37.101	3.971	14.23	22.925	37.223	0.622	17.079	35.149	29.337	-0.256	15.733	35.322	47.783	3.05	10.098	30.363	46.476	3.632	21.609	17.138	41.182	-1.226	28.247	27.518	42.403	6.747	19.493	35.129	-0.875	-0.854
	-0.809	10.017	16.859	26.797	-7.361	26.462	23.597	28.336	0.22	21.828	18.164	47.434	3.86	18.814	29.017	36.198	1.167	12.123	38.171	43.143	3.971	14.23	22.925	37.223	0.622	17.079	35.149	29.337	-0.256	15.733	47.754	47.783	3.05	10.098	30.363	46.476	3.632	21.609	17.138	41.182	-1.226	28.247	27.518	42.403	6.747	19.493	35.129	-0.875	-0.854
	-0.809	10.017	16.859	26.797	-7.361	26.462	23.597	28.336	0.22	21.828	18.164	47.434	3.86	18.814	29.017	36.198	1.167	12.123	38.171	43.143	3.971	14.23	22.925	37.223	0.622	17.079	35.149	29.337	-0.256	15.733	47.754	47.783	3.05	10.098	30.363	46.476	-3.873	21.609	17.138	41.182	-1.226	28.247	27.518	42.403	6.747	17.798	35.129	-0.875	-0.854
	-0.809	10.017	16.859	26.797	-7.361	26.462	23.597	28.336	0.22	21.828	18.164	47.434	3.86	18.814	27.671	36.198	1.167	12.123	38.171	43.143	2.017	14.23	22.925	37.223	0.622	30.192	35.149	29.337	-0.256	15.733	35.135	47.783	3.05	10.098	30.363	46.476	-3.873	21.609	17.138	41.62	-1.226	28.247	27.518	42.403	6.747	17.798	35.129	-0.875	-0.854
	-0.809	10.017	16.859	26.797	-1.301	26.462	29.774	28.336	0.22	21.828	18.164	47.434	3.86	18.814	27.671	36.198	1.167	20.963	38.171	30.234	2.017	14.23	22.925	37.223	0.622	30.192	35.149	45.111	-0.256	15.733	35.135	47.783	3.05	10.778	30.363	46.476	-3.873	21.609	17.138	41.62	-1.226	20.76	27.518	42.403	6.747	17.798	35.129	-0.875	-0.854
	-0.809	10.017	16.859	26.797	-1.301	26.462	29.774	28.336	0.22	21.828	18.164	47.434	3.86	18.814	27.671	36.198	1.167	20.963	38.171	30.234	2.017	14.23	22.925	37.223	0.622	30.192	35.149	45.111	-0.256	15.733	35.135	47.783	3.05	10.778	30.363	46.476	-3.873	21.609	17.138	40.308	-1.226	20.76	27.518	42.403	-1.683	17.798	35.129	-0.875	-0.854
	-0.809	10.017	16.859	26.797	-1.301	26.462	29.774	28.336	0.22	21.828	18.164	36.172	3.86	18.814	27.671	36.198	1.167	26.954	38.171	42.996	2.017	14.23	22.925	37.223	0.622	23.951	19.925	45.111	-0.256	15.733	35.135	47.783	3.05	10.778	30.363	35.731	-3.873	21.609	9.976	40.308	-1.226	20.374	27.518	42.403	-1.683	17.798	35.129	-0.875	-0.854
	-0.809	10.017	16.859	26.797	0.385	26.462	29.774	28.336	0.22	21.828	18.164	36.172	3.86	18.814	27.671	36.198	2.649	26.954	38.171	42.996	2.017	14.23	22.925	37.223	-0.92	23.951	19.925	45.111	-0.256	15.733	35.135	47.783	3.05	10.778	30.363	35.731	-3.873	21.609	9.976	40.308	-1.226	20.374	27.518	42.403	-1.683	17.798	35.129	-0.875	-0.854
	-0.809	10.017	16.859	26.797	0.385	26.462	29.774	28.336	0.22	21.828	18.164	41.479	-30.431	18.814	27.671	36.198	2.649	26.954	38.171	42.996	2.017	14.23	25.965	37.223	-0.92	23.951	11.666	36.655	-0.256	15.733	23.565	47.783	3.05	10.778	30.363	46.213	-3.873	21.609	9.976	40.308	-1.226	20.374	27.518	42.403	-1.683	17.798	35.129	-0.875	-0.854
	-0.809	10.017	16.859	26.797	0.385	26.462	29.774	28.336	-0.729	21.828	18.164	41.479	-30.431	18.814	27.671	36.198	2.649	26.954	38.171	42.996	10.543	14.23	25.965	37.223	-0.92	23.951	11.666	36.655	-0.256	43.093	23.565	44.605	3.05	10.778	30.363	46.213	-3.873	21.609	9.976	31.576	-1.226	20.374	27.518	42.403	-1.683	17.798	35.129	-0.875	-0.854
	-0.809	10.017	24.899	26.797	0.385	26.462	29.774	28.336	-0.729	21.828	18.164	41.479	-30.431	18.814	32.393	36.198	2.649	26.954	38.171	43.488	10.543	14.23	25.965	37.223	-0.92	23.951	11.666	36.655	-0.256	43.093	23.565	44.605	3.05	10.778	30.363	46.213	-3.873	21.609	9.976	31.576	-1.226	20.374	27.518	42.403	-1.683	17.798	35.129	-0.875	-0.854
	-0.809	10.017	24.899	26.797	0.385	26.462	29.774	28.336	-0.729	21.828	18.164	46.971	-4.005	18.814	32.393	36.198	2.649	26.954	38.171	43.488	-11.158	14.23	25.965	37.223	-0.92	23.951	11.666	36.655	-0.256	43.093	23.565	44.605	3.05	10.778	30.363	46.213	-3.873	21.609	9.976	31.576	-1.226	20.374	27.518	42.403	-1.683	17.798	35.129	-0.875	-0.854
	-0.809	10.017	19.813	26.797	0.385	26.462	29.774	28.336	-0.729	21.828	18.164	46.971	-4.005	18.814	32.393	36.198	2.649	26.954	38.171	43.488	-11.158	14.23	25.965	37.223	-0.92	23.951	11.666	36.655	-0.256	32.51	59.017	44.605	3.05	10.778	30.363	46.213	5.72	21.609	9.976	31.576	-1.226	20.374	27.518	42.403	-1.683	17.798	35.129	-0.875	-0.854
	-0.809	10.017	19.813	32.537	0.385	26.462	29.774	28.336	-0.729	21.828	18.164	41.726	-4.005	18.814	32.393	36.198	2.649	29.07	38.171	37.373	-11.158	14.23	25.965	37.223	-0.92	29.557	11.666	36.655	-0.256	32.51	59.017	44.605	3.05	10.778	30.363	46.213	5.72	21.609	9.976	42.947	-1.226	20.374	27.518	42.403	-1.683	17.798	35.129	-0.875	-0.854
	-0.809	10.017	19.813	32.537	0.385	26.462	29.774	29.827	-0.729	21.828	18.164	41.726	-4.005	18.814	32.393	36.198	2.649	29.07	38.171	37.373	-11.158	14.23	25.965	37.223	-0.92	29.557	11.666	36.655	-0.256	32.51	59.017	44.605	3.05	10.778	30.363	46.213	5.72	21.609	9.976	42.947	-1.226	20.374	27.518	42.403	-1.683	17.798	35.129	-0.875	-0.854
	-0.809	10.017	11.408	24.411	0.385	26.462	29.774	29.827	-0.729	21.828	18.164	41.726	-4.005	18.814	32.393	36.198	2.649	29.07	38.171	37.373	-11.158	14.23	25.965	37.223	-0.92	29.557	11.666	36.655	-0.256	32.51	59.017	44.605	3.05	10.778	30.363	46.213	5.72	21.609	9.976	42.947	-1.226	20.374	27.518	42.403	-1.683	17.798	35.129	-0.875	-0.854
	-0.809	10.017	11.408	24.411	0.385	26.462	29.774	29.827	-0.729	21.828	11.969	41.726	-4.005	18.814	32.393	36.198	2.649	29.07	38.171	37.373	-11.158	14.23	25.965	37.223	-0.92	29.557	29.917	36.655	-0.256	32.51	59.017	44.605	-3.957	10.778	30.363	45.74	-8.689	21.609	9.976	42.947	-1.226	20.374	27.518	42.403	-1.683	17.798	35.129	-0.875	-0.854
	-3.845	10.017	11.408	32.242	0.385	26.462	29.774	29.827	-0.729	19.254	11.969	41.726	-4.005	18.814	32.393	36.198	2.649	29.07	38.171	37.373	-11.158	14.23	35.109	37.223	-0.92	29.557	29.917	36.655	-0.256	32.51	32.303	44.605	-3.957	10.778	30.363	45.74	-8.689	21.609	9.976	42.947	-1.226	20.374	27.518	42.403	-1.683	17.798	35.129	-0.875	-0.854
	-3.845	10.017	11.408	32.242	0.385	26.462	29.774	29.825	-0.729	19.254	11.969	41.726	-4.005	18.814	32.393	36.198	2.649	24.408	38.171	37.373	-11.158	14.23	35.109	37.223	-0.92	29.557	29.917	36.655	-0.256	32.51	32.303	44.605	-3.957	10.778	30.363	45.74	-8.689	21.609	10.943	42.947	-1.226	20.374	27.518	42.403	-1.683	17.798	35.129	-0.875	-0.854
	-3.845	10.017	11.408	32.242	0.385	26.462	22.576	29.825	-0.729	19.254	11.969	29.506	-4.005	18.814	32.393	36.198	2.649	24.408	38.171	37.373	-11.158	14.23	35.109	37.223	-0.92	29.557	29.917	36.655	-0.256	32.51	32.303	44.605	-3.45	10.778	30.363	45.74	-8.689	21.609	10.943	42.947	-1.226	20.374	27.518	42.403	-1.683	17.798	35.129	-0.875	-0.854
	-3.845	10.017	11.408	32.242	0.385	26.462	22.576	29.825	-0.729	19.254	35.348	29.506	-4.005	18.814	32.393	36.198	2.649	24.408	38.171	37.373	-8.486	14.23	35.109	37.223	-0.92	29.557	29.917	36.655	-0.256	32.51	32.303	44.605	-3.45	10.778	30.363	48.381	5.443	21.609	10.943	42.947	-1.226	20.374	27.518	42.403	-1.683	17.798	35.129	-0.875	-0.854
	-3.845	10.017	15.918	32.242	0.385	30.03	24.566	29.825	-0.729	19.254	35.348	29.506	-4.005	18.814	32.393	36.198	2.649	24.408	38.171	37.373	-8.486	14.23	35.109	37.223	-0.92	29.557	29.917	36.655	-0.256	32.51	32.303	45.138	-3.45	10.778	30.363	63.266	5.443	21.609	10.943	42.947	-1.226	20.374	27.518	42.403	-1.683	17.798	35.129	-0.875	-0.854
	-3.845	10.017	15.918	32.242	0.385	30.03	24.566	29.825	-0.729	19.254	35.348	29.506	-4.005	18.814	32.393	36.198	2.649	24.408	38.171	38.427	6.577	14.23	35.109	37.223	-0.92	29.557	29.917	36.655	-0.256	32.51	32.303	42.523	-3.45	10.778	30.363	63.266	5.443	21.609	10.943	42.947	-1.226	20.374	27.518	42.403	-1.683	17.798	35.129	-0.875	-0.854
	-3.845	10.017	15.918	32.242	0.385	30.03	24.566	29.825	-0.729	19.254	35.348	29.506	-4.005	18.814	28.162	36.198	2.649	27.736	38.171	38.427	6.577	14.23	35.109	37.223	-0.92	29.557	8.127	36.655	-0.256	32.51	32.303	42.523	-3.45	10.778	29.467	63.266	5.443	21.609	10.943	42.947	-1.226	20.374	27.518	42.403	-1.683	17.798	35.129	-0.875	-0.854
	-3.845	10.017	15.918	32.242	0.385	30.03	24.566	29.824	5.479	19.254	35.348	28.709	-4.005	18.814	28.162	36.198	2.649	27.736	38.171	38.427	6.577	14.23	35.109	37.223	-0.92	29.557	8.127	36.655	-0.256	32.51	32.303	42.523	-3.45	10.778	29.467	31.018	6.385	21.609	10.943	42.947	-1.226	20.374	27.518	42.403	-1.683	17.798	35.129	-0.875	-0.854
	-3.845	10.017	15.918	32.242	0.385	30.03	24.566	29.824	5.479	19.254	35.348	28.709	-4.005	18.814	28.162	36.198	2.649	27.736	38.171	38.427	6.577	14.23	35.109	37.223	-0.92	29.557	20.918	36.655	-0.256	32.51	32.303	61.257	-3.45	10.778	29.467	31.018	6.385	21.609	10.943	42.947	-1.226	20.374	27.518	42.403	1.889	17.798	35.129	-0.875	-0.854
	-3.845	10.017	15.918	32.242	0.148	30.03	24.566	29.824	0.217	19.254	35.348	28.709	1.368	18.814	12.825	36.198	2.649	27.736	38.171	42.36	6.577	14.23	35.109	37.223	-0.92	29.557	20.918	36.655	-0.256	32.51	51.33	61.257	-3.45	10.778	29.467	31.018	4.89	21.609	10.943	42.947	-1.226	20.374	27.518	42.403	1.889	17.798	35.129	-0.875	-0.854
	-3.845	10.017	15.918	32.242	0.148	40.096	24.566	29.824	0.217	19.254	35.348	28.709	1.368	18.814	12.825	36.198	2.649	27.736	38.171	42.36	6.577	14.23	35.109	37.223	-0.92	29.557	20.918	36.655	-0.256	32.51	51.33	41.579	1.276	10.778	28.563	28.564	4.89	14.574	10.943	42.947	-1.226	20.374	27.518	42.403	1.889	17.798	35.129	-0.875	-0.854
	-3.845	10.017	15.918	27.736	0.148	40.096	24.566	25.26	0.217	19.254	35.348	39.033	1.368	18.814	12.825	36.198	2.649	27.736	38.171	42.36	6.577	14.23	35.109	37.223	-0.92	29.557	20.918	36.655	-0.256	32.51	51.33	41.579	1.276	10.778	28.563	28.564	4.89	14.574	10.943	42.947	-1.226	20.374	27.518	42.403	1.889	17.798	35.129	-0.875	-0.854
	-3.845	10.017	15.918	27.736	0.148	40.096	24.566	25.26	0.217	22.418	35.348	39.033	1.368	18.814	12.825	36.198	2.649	27.736	38.171	42.36	6.577	14.23	35.109	37.223	0.116	25.251	24.79	36.655	-0.256	32.51	49.83	41.579	1.276	10.778	28.563	28.564	4.89	14.892	10.943	42.947	-1.226	20.374	27.518	42.403	1.889	17.798	35.129	-0.875	-0.854
	-3.845	10.017	15.918	27.736	0.148	40.096	24.566	29.824	0.217	22.418	35.348	39.033	1.368	18.814	12.825	36.198	2.649	27.736	38.171	42.36	6.577	14.23	35.109	37.223	0.116	30.397	24.79	36.655	-0.256	34.778	49.83	41.579	6.196	10.778	29.32	32.699	4.89	14.892	10.943	42.947	-1.226	20.374	27.518	42.403	1.889	17.798	35.129	-0.875	-0.854
	-3.845	10.017	15.918	27.736	0.148	40.096	24.566	29.824	0.217	22.418	35.348	39.033	1.368	18.814	19.218	36.198	2.649	27.736	38.171	42.36	7.75	14.23	35.109	37.223	0.116	30.397	24.79	36.655	0.097	34.778	49.83	41.579	6.196	10.778	29.32	32.699	6.343	16.383	10.943	42.947	-1.226	20.374	27.518	42.403	1.889	17.798	35.129	-0.875	-0.854
	-3.845	10.017	15.918	33.701	-0.011	24.777	24.566	29.824	-0.326	22.418	35.348	39.033	1.368	18.814	19.218	36.198	2.649	27.736	38.171	42.36	7.75	14.23	35.109	37.223	0.116	30.397	39.968	36.655	0.097	34.778	49.83	41.579	6.196	10.778	29.32	32.699	6.343	16.383	10.943	42.947	-1.226	20.374	27.518	42.403	1.889	17.798	35.129	-0.875	-0.854
	1.894	10.017	15.918	33.701	-0.011	24.777	24.566	29.824	-0.326	22.418	35.348	39.033	1.368	18.814	19.218	36.198	2.649	27.736	38.171	42.36	7.75	14.23	35.109	37.223	0.116	30.397	39.968	36.655	0.097	34.778	49.83	41.579	-4.007	10.778	29.32	32.699	6.343	23.946	10.943	42.947	-1.226	20.374	27.518	42.403	1.889	17.798	35.129	-0.875	-0.854
	1.894	10.017	15.918	33.701	-0.011	24.777	24.566	29.832	-0.326	22.418	35.348	39.033	1.368	18.814	19.218	36.198	2.649	27.736	38.171	42.36	7.75	14.23	35.109	37.223	0.116	30.397	39.968	36.655	0.097	34.778	49.83	41.579	-4.007	10.778	29.32	33.931	-3.824	23.946	10.943	38.48	-1.226	20.374	27.518	42.403	1.889	17.798	35.129	-0.875	-0.854
	1.894	10.017	15.918	33.701	-0.011	24.777	24.566	29.832	-0.326	22.418	35.348	39.033	9.232	18.814	19.218	36.198	2.649	27.736	38.171	42.36	7.75	14.23	35.109	37.223	0.116	30.397	39.968	36.655	0.097	36.801	49.83	41.579	-4.007	10.778	29.32	33.931	-3.824	23.946	10.943	38.48	-1.226	20.374	27.518	42.403	1.889	17.798	35.129	-0.875	-0.854
	1.894	10.017	15.918	33.701	-0.011	24.777	24.566	29.832	-1.265	22.418	35.348	39.033	9.232	18.814	19.218	36.198	2.649	27.736	38.171	42.36	7.75	14.23	35.109	37.223	0.116	35.272	2.241	36.655	0.097	36.801	49.83	41.579	6.357	25.138	29.32	33.931	-3.824	23.946	10.943	38.48	-0.136	20.374	27.518	42.403	1.889	17.798	35.129	-0.875	-0.854
	1.894	10.017	15.918	33.701	-0.011	24.777	24.566	29.832	-1.265	18.728	35.348	39.033	9.232	18.814	19.218	36.198	2.649	27.736	38.171	42.36	7.75	14.23	35.109	37.223	0.116	35.272	2.241	36.655	0.097	36.801	43.649	41.579	6.357	25.138	29.32	33.931	10.386	23.946	10.943	38.48	-0.136	20.374	27.518	42.403	-0.518	17.798	35.129	-0.875	-0.854
	1.894	10.017	15.918	33.701	-0.011	24.777	24.566	29.832	-1.265	18.728	35.348	39.033	9.232	18.814	19.218	36.198	2.649	27.736	38.171	42.36	-2.626	14.23	35.109	37.223	0.116	35.272	2.241	36.655	0.097	36.801	43.649	41.579	6.357	25.138	29.32	33.931	10.386	23.946	10.943	38.48	-0.136	20.374	27.518	42.403	-0.518	17.798	35.129	-0.875	-0.854
	1.894	10.017	15.918	33.701	-0.011	24.777	24.566	29.832	-1.265	18.728	35.348	39.033	9.232	18.814	30.353	36.198	2.649	27.736	38.171	42.36	-2.626	14.23	35.109	37.223	0.116	35.272	15.372	36.655	0.097	36.801	43.649	41.579	-5.113	25.138	28.519	21.796	10.386	23.946	10.943	38.48	-2.238	20.374	27.518	42.403	-0.518	17.798	35.129	-0.875	-0.854
	1.894	10.017	15.918	33.701	-0.011	24.777	31.856	29.832	-1.265	18.728	35.348	39.033	-2.329	18.814	30.353	36.198	2.649	27.736	38.171	42.36	4.892	14.23	35.109	37.223	0.116	16.312	15.372	33.739	0.097	36.801	43.649	46.049	-5.113	25.138	28.519	21.796	10.386	23.946	10.943	38.406	-2.238	16.625	27.518	42.403	-0.518	21.249	35.129	-0.875	-0.854
	1.894	10.017	15.918	33.701	-0.85	24.777	31.856	29.832	-1.265	18.728	35.348	39.033	-2.329	18.814	30.353	36.198	2.649	27.736	38.171	42.36	4.892	14.23	35.109	37.223	0.116	16.312	15.372	33.739	0.097	36.801	43.649	46.049	-5.113	25.138	28.519	21.796	0.519	23.946	10.943	38.406	-2.238	16.625	27.518	42.403	-0.608	21.249	35.129	-0.875	-0.854
	1.894	10.017	15.918	33.701	-0.85	24.777	24.383	29.832	-1.265	18.728	35.348	39.033	-2.329	18.814	30.353	36.198	2.649	20.891	38.171	42.36	4.892	14.23	35.109	37.223	0.116	16.312	29.321	33.739	7.27	36.801	43.649	46.049	-5.113	25.138	28.519	21.796	0.519	23.946	10.943	38.406	-2.238	16.625	27.518	42.403	-0.608	20.816	35.129	-0.875	-0.854
	1.894	10.017	15.918	33.701	-0.85	24.777	24.383	29.832	-1.265	18.728	35.348	39.033	-2.756	18.814	14.296	36.198	2.649	20.891	38.171	42.36	4.892	14.23	35.109	37.223	0.116	16.312	29.321	33.739	7.27	36.801	43.649	46.049	-5.113	13.995	28.519	26.978	-14.982	23.946	10.943	38.406	-2.238	22.675	27.518	42.403	-0.608	20.816	35.129	-0.875	-0.854
	1.894	10.017	15.918	33.701	-0.85	24.777	24.383	29.832	-1.265	18.728	35.348	39.033	-2.756	18.814	14.296	36.198	2.649	20.891	38.171	42.36	4.892	14.23	35.109	37.223	0.116	16.312	29.321	33.739	7.27	36.801	43.649	46.049	-5.113	13.995	28.519	26.978	-14.982	23.946	10.943	38.406	-2.238	22.675	27.518	42.403	-0.608	20.816	35.129	-0.875	-0.854
	1.894	10.017	15.918	33.701	-0.85	24.777	24.383	29.819	-1.265	18.728	35.348	39.033	-2.756	18.814	14.296	36.198	2.649	20.891	38.171	42.36	4.892	14.23	35.109	37.223	0.116	16.312	29.321	33.739	-0.123	36.801	43.649	46.049	-2.857	13.995	28.519	26.978	-14.982	23.946	10.943	38.406	-2.238	22.675	27.518	42.403	-0.608	20.816	35.129	-0.875	-0.854
	1.894	10.017	15.918	33.701	-1.354	24.777	24.383	29.819	-1.265	18.728	35.348	39.033	-2.756	18.814	15.588	36.198	2.649	20.891	38.171	42.36	-7.283	14.23	35.109	37.223	0.116	16.312	29.321	33.739	-0.123	36.801	43.649	46.049	-2.857	13.995	28.519	26.978	7.65	23.946	24.449	38.406	-2.238	22.675	27.518	42.403	-0.608	20.816	35.129	-0.875	-0.854
	1.894	10.017	15.918	33.701	-1.354	24.777	24.383	29.819	-1.265	18.728	35.348	39.033	-2.756	18.814	15.588	36.198	2.649	20.891	38.171	42.36	-7.283	14.23	35.109	37.223	0.116	16.312	29.321	33.739	-0.123	36.801	43.649	46.049	-2.857	13.995	28.519	26.978	7.65	23.946	24.449	38.406	-2.238	22.675	27.518	42.403	-0.608	20.816	35.129	-0.875	-0.854
	1.894	10.017	15.918	30.546	-1.354	24.777	24.383	29.825	-1.265	18.728	35.348	39.033	-2.756	20.865	24.123	36.198	2.649	27.217	38.171	42.36	-7.283	14.23	35.109	37.223	0.116	16.312	29.321	33.739	-0.123	36.801	43.649	46.049	-8.374	13.995	28.519	26.978	-1.485	23.946	24.449	38.406	-2.238	22.25	27.518	42.403	-0.608	20.816	35.129	-0.875	1.181
	1.894	10.017	15.918	30.546	-1.354	24.777	24.383	29.825	-1.265	18.728	35.348	39.033	-2.756	20.865	24.123	36.198	2.649	27.217	38.171	42.36	-7.283	15.933	35.109	37.223	0.116	13.681	29.321	33.739	-0.123	36.801	43.649	46.049	-8.374	13.995	28.519	26.978	-1.485	23.946	24.449	38.406	-2.238	22.25	27.518	42.403	-0.608	20.816	35.129	-0.875	1.181
	1.894	10.017	15.918	30.546	-1.354	24.777	24.383	29.825	-1.265	18.728	35.348	33.713	-1.563	20.865	24.999	36.198	2.649	27.217	38.171	48.523	6.359	15.933	35.109	37.223	0.116	13.681	29.321	33.739	-0.123	36.801	43.649	46.049	-8.374	13.995	29.737	26.978	-1.485	23.946	24.449	38.406	-2.238	22.25	27.518	42.403	-0.608	20.816	35.129	-0.875	1.181
	1.894	10.017	15.918	30.546	-1.354	24.777	24.383	29.825	-1.265	18.728	36.138	33.713	-1.563	20.865	24.999	36.198	2.649	27.217	38.171	48.523	6.359	15.933	35.109	37.223	0.116	13.681	5.538	33.739	-0.123	36.801	43.649	46.049	-8.374	13.995	29.737	26.978	-1.485	23.946	24.449	38.406	-2.238	22.25	27.518	42.403	-0.608	20.816	35.129	-0.875	1.181
	1.894	10.017	15.918	30.546	2.247	24.777	24.383	29.828	-1.265	18.728	36.138	33.713	-1.563	20.865	24.999	36.198	-2.523	27.217	38.171	48.523	6.359	15.933	35.109	37.223	0.116	13.681	5.538	33.739	-0.123	36.801	43.649	58.804	4.72	13.995	29.737	26.978	-1.485	23.946	24.449	38.406	-2.238	22.25	27.518	42.403	-0.608	20.816	35.129	-0.875	1.181
	1.894	10.017	15.361	30.546	2.247	24.777	24.383	29.828	-1.265	18.728	36.138	33.713	-1.563	20.865	24.999	36.198	-2.523	27.217	38.171	48.523	4.087	15.933	35.109	37.223	0.116	13.681	5.538	33.739	-0.123	36.801	43.649	58.804	4.72	13.995	29.737	26.978	-1.485	23.946	24.449	38.406	-2.238	22.25	27.518	42.403	-0.608	20.816	35.129	-0.875	1.181
	1.894	10.017	15.361	30.546	2.247	24.777	24.383	29.822	-1.265	14.486	36.138	33.713	-1.563	20.865	24.745	36.198	-2.523	27.217	38.171	48.523	4.087	15.933	35.109	37.223	0.116	13.681	5.538	33.739	-0.123	36.801	43.649	50.357	4.72	13.995	29.737	26.978	-1.485	23.946	30.109	38.406	-2.238	22.25	27.518	42.403	-0.608	20.816	35.129	-0.875	1.181
	1.894	10.017	20.301	30.546	2.247	24.777	24.383	29.822	-1.265	14.486	36.138	33.713	-2.447	22.62	24.745	36.198	-2.523	27.217	38.171	48.523	4.087	15.933	35.109	37.223	0.116	23.409	10.956	33.739	-0.123	36.801	43.649	50.357	4.72	13.995	29.737	26.978	-1.485	23.946	30.109	38.406	-2.238	22.25	27.518	42.403	-0.608	20.816	35.129	-0.875	1.181
	1.894	10.017	20.301	30.546	2.247	24.777	24.383	29.822	-1.265	14.486	36.138	33.713	-2.447	22.62	24.745	36.198	-2.538	27.217	38.171	48.523	4.087	15.933	35.109	37.223	0.116	23.409	10.956	33.739	-0.123	36.801	43.649	45.536	4.72	13.995	27.236	26.978	-1.485	23.946	30.109	38.406	-2.238	22.25	27.518	42.403	-0.608	19.191	35.129	-0.875	1.181
	1.894	10.017	20.301	30.546	2.247	24.777	24.383	29.822	-1.265	21.36	36.138	33.713	-2.324	22.62	24.745	36.198	-2.538	27.217	38.171	48.523	0.541	15.933	35.109	37.223	0.116	12.385	34.287	33.739	-0.123	36.801	43.649	45.536	2.331	13.995	27.236	26.978	-1.485	23.946	30.109	38.406	-2.238	22.25	27.518	42.403	-2.317	19.191	35.129	-0.875	1.181
	1.894	10.017	20.301	30.546	2.247	24.777	24.383	29.822	-1.265	21.36	36.138	33.713	-2.324	22.62	24.745	36.198	-2.538	27.217	38.171	48.523	0.541	15.933	35.109	37.223	0.116	12.385	34.287	33.739	-0.123	36.801	43.649	45.536	2.331	13.995	27.236	26.978	-1.485	23.946	30.109	38.406	-2.238	22.25	27.518	42.403	-2.317	19.191	35.129	-0.875	1.181
	1.894	10.017	20.301	30.546	2.247	24.777	24.383	29.822	-1.265	21.36	36.138	33.713	-2.324	22.62	24.745	36.198	-2.538	27.217	38.171	48.523	0.541	15.933	35.109	37.223	0.116	12.385	34.287	33.739	-0.123	36.801	43.649	45.536	2.331	13.995	27.236	26.978	-1.485	23.946	30.109	38.406	2.291	22.25	27.518	42.403	-2.317	19.191	35.129	-0.875	1.181
	1.894	10.017	20.301	30.546	2.247	24.777	24.383	29.822	-1.265	21.36	36.138	33.713	-2.324	22.62	24.745	36.198	-2.538	27.217	38.171	48.523	-9.364	15.933	35.109	37.223	0.116	12.385	23.496	52.865	0.933	36.801	43.649	45.536	2.331	19.378	27.236	26.978	-1.485	23.946	30.158	38.406	7.116	22.25	27.518	42.403	-2.317	19.191	35.129	-0.875	1.181
	1.894	10.017	20.301	30.546	2.247	24.777	24.383	29.822	5.025	21.36	36.138	33.713	-2.883	22.62	24.745	36.198	-2.538	27.217	38.171	48.523	-9.364	15.933	32.691	37.223	0.116	12.385	23.496	52.865	0.933	36.801	43.649	45.536	2.331	19.378	27.236	26.978	-14.349	23.946	30.158	38.406	7.116	22.25	27.518	42.403	-2.317	19.191	35.129	-0.875	1.181
	1.894	10.017	28.4	30.546	2.247	24.777	24.383	29.822	5.025	21.36	36.138	33.713	-2.883	22.62	24.745	36.198	-2.538	27.217	38.171	48.523	4.306	15.933	32.691	37.223	0.116	11.187	23.496	52.865	-4.279	36.801	43.649	45.536	2.331	19.378	27.236	26.978	-14.349	23.946	30.158	38.406	7.116	22.25	27.518	42.403	5.393	19.191	35.129	-0.875	1.181
	1.894	10.017	28.4	41.638	2.247	24.777	24.383	29.822	5.407	21.36	36.138	33.713	-1.979	22.62	24.745	36.198	-2.538	27.217	38.171	48.523	4.306	15.933	32.691	37.223	0.116	13.05	23.496	52.865	-4.279	36.801	43.649	45.536	2.331	19.378	27.236	23.878	-3.637	24.467	30.158	38.406	7.116	22.25	27.518	42.403	5.393	19.191	35.129	-0.875	1.181
	1.894	10.017	28.4	41.638	2.247	24.777	24.383	29.822	5.407	21.36	36.138	33.713	-1.979	22.62	24.745	36.198	-2.538	27.217	38.171	44.6	4.306	15.933	32.691	37.223	0.116	13.05	23.496	52.865	-4.279	36.801	55.502	45.536	2.331	19.378	29.014	23.878	-3.637	24.467	30.158	38.406	7.116	22.25	27.518	42.403	5.393	19.191	35.129	-0.875	1.181
	1.894	10.017	28.4	41.638	2.247	24.777	24.383	29.822	5.407	21.36	36.138	33.713	-0.047	22.62	20.092	36.198	-2.538	27.217	38.171	44.6	4.306	15.933	32.691	37.223	0.116	13.05	42.038	52.865	-4.279	36.801	55.502	45.536	2.331	19.378	29.014	23.878	-3.637	24.467	30.158	38.406	7.116	22.25	27.518	42.403	-5.277	19.191	35.129	-0.875	1.181
	1.894	10.017	28.4	33.774	-5.506	24.777	24.383	29.822	5.407	21.36	36.138	33.713	-0.047	22.62	20.092	36.198	-2.538	27.217	38.171	44.6	4.306	15.933	32.691	37.223	0.116	24.714	42.038	35.564	-4.279	36.801	55.502	45.536	2.331	19.378	29.014	31.546	-3.637	24.467	30.158	38.406	7.116	22.25	27.518	42.403	-5.277	19.191	35.129	-0.875	1.181
	1.894	10.017	18.345	33.774	-5.506	24.777	24.383	29.822	1.316	21.36	36.138	33.713	-0.047	22.62	20.092	36.198	-2.538	27.217	38.171	44.6	4.306	15.933	32.691	37.223	0.116	24.714	34.145	35.564	-4.279	36.801	55.502	45.536	-1.191	19.378	29.014	31.546	7.37	24.467	30.158	38.406	7.116	22.25	27.518	42.403	-5.277	19.191	35.129	-0.875	1.181
	1.894	10.017	18.345	33.774	-5.506	24.777	24.383	29.822	1.316	21.36	36.138	33.713	-0.047	22.62	20.092	36.198	-2.538	17.964	38.171	44.6	-10.256	15.933	32.691	37.223	0.116	24.714	34.145	35.564	-4.279	36.801	55.502	45.536	-1.191	19.378	29.014	31.546	7.37	24.467	30.158	38.406	7.116	22.25	27.518	42.403	9.309	19.191	35.129	-0.875	1.181
	1.894	10.017	18.345	33.774	-5.506	24.777	24.383	29.827	1.316	26.129	36.138	33.713	-0.047	22.62	20.092	36.198	-2.538	17.964	38.171	44.6	-10.256	15.933	32.691	37.223	0.116	12.402	34.145	34.513	-4.279	36.801	55.502	45.536	-1.191	19.378	29.014	31.546	-8.213	24.467	30.158	38.406	7.116	22.25	27.518	42.403	9.309	26.055	35.129	-0.875	1.181
	1.894	10.017	18.345	33.774	-5.506	24.777	24.383	29.827	1.316	26.129	36.138	33.713	-0.047	22.62	20.092	36.198	-2.538	17.964	38.171	44.6	-10.256	15.933	32.691	37.223	0.116	12.402	40.46	34.513	-4.279	36.801	55.502	45.536	-1.191	25.349	29.014	31.546	-8.213	24.467	30.158	38.406	7.116	22.25	27.518	42.403	9.309	26.055	35.129	-0.875	1.181
	1.894	10.017	18.345	33.774	-5.506	24.777	24.383	29.827	-1.77	26.129	36.138	33.713	-0.047	22.62	20.092	36.198	-2.538	17.964	38.171	44.6	-19.691	15.933	32.691	37.223	0.116	12.402	40.46	34.513	-4.279	36.801	55.502	45.536	-1.191	25.349	29.014	31.546	-8.213	24.467	30.158	38.406	7.116	22.25	27.518	42.403	0.201	26.055	35.129	-0.875	1.181
	1.894	10.017	18.345	33.774	-5.506	24.777	24.383	29.827	-1.77	26.129	36.138	33.713	-0.047	22.62	20.092	36.198	-2.538	18.005	38.171	44.6	-19.691	15.933	32.691	37.223	0.116	12.402	40.46	34.513	-4.279	36.801	55.502	45.536	-1.191	25.349	29.014	31.546	-8.213	24.467	30.158	38.406	7.116	22.25	27.518	42.403	0.201	26.055	35.129	-0.875	1.181
	1.894	10.017	18.345	33.774	-5.506	24.777	24.383	29.827	-1.77	24.604	36.138	33.713	-0.047	22.62	20.092	36.198	-2.538	18.005	38.171	44.6	1.545	15.933	32.691	37.223	0.116	12.402	40.46	34.697	-4.279	36.801	55.502	45.536	-1.191	22.731	29.014	31.546	-8.213	24.467	30.158	38.406	7.116	22.25	27.518	42.403	0.201	8.864	35.129	-0.875	1.181
	1.894	10.017	18.345	33.774	-5.506	24.777	24.383	29.827	-1.77	24.604	36.138	33.713	-0.047	22.62	20.092	36.198	-2.538	18.005	38.171	44.6	1.545	15.933	32.691	37.223	0.116	12.402	36.343	34.697	-8.289	36.801	55.502	45.536	-1.191	22.731	29.014	31.546	-8.213	24.467	30.158	38.406	7.116	22.25	27.518	42.403	0.201	8.864	35.129	-0.875	1.181
	1.894	10.017	15.575	33.774	-5.506	24.777	24.383	29.827	-1.77	24.604	36.138	33.713	-5.304	22.62	20.092	36.198	-2.538	18.005	38.171	56.895	1.545	15.933	32.691	37.223	0.116	12.402	36.343	34.697	-8.289	36.801	55.502	45.536	-1.191	22.731	29.014	31.546	-8.213	24.467	30.158	38.406	7.116	22.25	27.518	42.403	0.201	8.864	35.129	-0.875	1.181
	1.894	10.017	15.575	33.774	-5.506	24.777	24.383	29.827	-1.77	24.604	36.138	33.713	-5.304	22.62	20.092	36.198	-2.538	18.005	38.171	56.895	-0.927	19.621	32.691	37.223	0.116	12.402	36.343	34.697	-8.289	36.801	55.502	50.458	-1.191	22.731	29.014	31.546	-3.006	24.467	30.158	38.406	7.116	22.25	27.518	42.403	0.201	8.864	35.129	-0.875	1.181
	1.894	10.017	15.575	33.774	-5.506	24.777	18.198	29.827	-1.77	24.604	36.138	33.713	-5.304	22.62	20.092	36.198	-2.538	18.005	38.171	56.895	-0.927	19.621	32.691	37.223	0.116	12.402	36.343	34.697	-8.289	36.801	55.502	50.458	-1.191	22.731	29.014	31.546	-3.006	24.467	30.158	38.406	7.116	22.25	27.518	42.403	0.201	8.864	35.129	-0.875	1.181
	1.894	10.017	15.575	33.774	3.555	24.777	18.198	29.827	-1.77	24.604	36.138	33.713	-5.304	22.62	20.092	36.198	-2.538	18.005	38.171	56.895	-0.927	19.621	32.691	37.223	0.116	12.402	36.343	34.697	-8.289	36.801	55.502	50.458	-1.191	22.731	29.014	31.546	-3.006	24.467	30.158	38.412	7.116	22.25	27.518	42.403	0.201	8.864	35.129	-0.875	1.181
	1.894	10.017	15.575	33.774	3.555	24.777	18.198	29.827	-1.77	17.096	36.138	33.713	-5.304	22.62	20.092	36.198	-2.538	18.005	38.171	56.895	-0.927	19.621	32.691	37.223	0.116	12.402	36.343	34.697	6.403	36.801	55.502	50.458	-1.191	22.731	29.014	30.927	-3.006	24.467	30.158	38.412	7.116	22.25	27.518	42.403	0.201	6.585	35.129	-0.875	1.181
	1.894	10.017	15.575	49.333	3.555	24.777	18.198	29.827	-1.77	18.213	36.138	33.713	-5.304	22.62	20.092	36.198	-2.538	18.005	38.171	56.895	-0.927	19.621	32.691	37.223	0.116	12.402	36.343	34.697	6.403	36.801	55.502	50.458	-1.191	22.731	29.014	30.927	-3.006	24.467	30.158	38.412	7.116	22.25	27.518	42.403	0.201	6.585	35.129	-0.875	1.181
	1.894	10.017	16.863	49.333	3.555	24.777	18.198	29.827	-1.77	18.213	36.138	33.713	5.686	22.62	20.092	36.198	-2.538	18.005	38.171	56.895	1.085	19.621	32.691	37.223	0.116	12.402	36.343	34.697	6.403	36.801	55.502	50.458	-1.191	22.731	29.014	30.927	-0.789	24.467	30.158	38.412	7.116	22.25	27.518	42.403	0.201	6.585	35.129	-0.875	3.213
	1.894	10.017	16.863	49.333	3.555	24.777	18.198	29.827	-1.77	18.213	36.138	33.713	5.686	22.62	20.092	36.198	-2.538	8.963	38.171	56.895	1.085	19.621	32.691	37.223	0.116	12.402	36.343	34.697	6.403	36.801	61.654	50.458	-1.191	22.731	29.014	30.927	-0.789	24.467	30.158	38.412	7.116	22.25	27.518	42.403	0.201	6.585	35.129	-0.875	3.213
	1.894	10.017	16.863	49.333	3.555	24.777	18.198	29.827	-1.77	18.213	36.138	33.713	1.304	22.62	20.092	36.198	-2.538	8.963	38.171	56.895	1.085	19.621	32.691	37.223	0.116	12.402	36.343	34.697	6.403	36.801	61.654	50.458	-1.191	22.731	29.014	30.927	-0.789	24.467	30.158	38.412	-0.288	22.25	27.518	42.403	0.201	6.585	35.129	-0.875	3.213
	1.894	10.017	16.863	49.333	3.555	24.777	18.198	29.827	1.021	18.213	36.138	33.713	1.304	22.62	20.092	36.198	-2.538	8.963	38.171	56.895	1.085	19.621	32.691	37.223	0.116	12.402	36.343	34.697	6.403	36.801	61.654	50.458	-1.191	22.731	29.014	30.927	-0.789	24.467	30.158	38.412	-0.288	22.25	27.518	42.403	0.201	17.641	35.129	-0.875	-0.453
	1.894	10.017	16.863	34.031	3.555	24.777	18.198	29.827	1.021	18.213	36.138	33.713	1.304	22.62	20.092	36.198	-2.538	20.821	38.171	56.895	1.085	19.621	32.691	37.223	0.116	12.402	36.343	34.697	6.403	36.801	61.189	50.458	-1.191	22.731	29.014	30.927	-0.789	24.467	30.158	38.412	-0.288	22.25	27.518	42.403	0.201	17.641	35.129	-0.875	-0.453
	1.894	10.017	16.863	34.031	3.555	24.777	18.198	29.827	1.021	18.213	36.138	33.713	1.304	22.62	20.092	36.198	-2.538	20.821	38.171	56.895	1.085	19.621	32.691	37.223	0.116	12.402	36.343	34.697	6.403	36.801	61.189	50.458	-1.191	22.731	29.014	30.927	-0.789	24.467	30.158	38.412	-0.288	22.25	27.518	42.403	0.201	17.641	35.129	-0.875	-0.453
	1.894	10.017	16.863	34.031	3.555	24.777	18.198	29.827	7.418	10.496	36.138	33.713	1.304	22.62	20.092	36.198	-2.538	20.821	38.171	56.895	1.085	19.621	32.691	37.223	0.116	12.402	36.343	34.697	6.403	36.801	61.189	55.404	-1.191	8.668	29.014	40.363	-0.789	24.467	30.158	38.412	-0.288	22.25	27.518	42.403	0.201	17.641	35.129	-0.875	-0.453
	1.894	10.017	16.863	34.031	3.555	24.777	18.198	29.827	7.418	10.496	36.138	33.713	1.304	22.62	20.092	36.198	-2.538	20.821	38.171	56.895	-0.418	19.621	32.691	37.223	0.116	22.035	36.343	34.697	6.403	36.801	61.189	55.404	-1.191	8.668	29.014	40.363	-0.789	24.467	30.158	56.321	-0.288	22.25	27.518	42.403	0.201	17.641	35.129	-0.875	-0.453
	1.894	10.017	16.863	34.031	3.555	24.777	18.198	29.827	-3.158	24.433	36.138	33.713	1.304	22.62	20.092	36.198	-2.538	20.821	38.171	56.895	-0.418	19.621	32.691	37.223	0.116	22.035	30.625	34.697	6.403	36.801	61.189	55.404	-1.733	8.668	29.014	40.363	-0.789	24.467	30.158	56.321	-0.288	22.25	30.989	42.403	0.201	17.641	35.129	-0.875	-0.453
	1.894	10.017	24.749	34.031	6.637	24.777	18.198	29.827	-3.158	24.433	36.138	33.713	1.304	22.62	20.092	36.198	-2.538	17.999	38.171	56.895	-0.418	19.621	32.691	37.223	0.116	22.035	37.791	34.697	6.403	36.801	61.189	55.404	-1.733	12.869	29.014	41.81	-0.789	24.467	30.158	64.831	-0.288	22.25	30.989	42.403	0.201	11.898	35.129	-0.875	-0.453
	1.894	10.017	24.749	34.031	6.637	24.777	18.198	29.827	-3.158	24.433	36.138	33.713	1.304	22.62	26.902	36.198	-2.538	17.999	38.171	56.895	-0.418	19.621	32.691	37.223	0.116	22.035	37.791	34.697	6.403	36.801	61.189	55.404	-1.733	12.869	29.014	41.81	-0.789	24.467	30.158	56.202	-0.288	22.25	30.989	42.403	0.201	11.898	35.129	-0.875	-0.453
	1.894	10.017	24.749	32.516	-3.279	24.777	18.198	29.827	-3.158	24.433	36.138	33.713	1.304	22.62	26.902	36.198	-2.538	17.999	38.171	56.895	-0.418	19.621	32.691	37.223	0.116	22.035	37.791	34.697	6.403	36.801	61.189	55.404	-1.733	12.869	29.014	41.81	-0.789	24.467	30.158	43.728	-0.288	22.25	30.989	42.403	0.201	11.898	35.129	-0.875	-0.453
	1.894	10.017	8.018	32.516	-3.279	23.525	18.198	29.827	-3.158	24.433	36.138	33.713	1.304	22.62	26.902	36.198	-2.538	17.999	38.171	56.895	-0.418	19.621	32.691	37.223	0.116	22.035	37.791	34.697	6.403	36.801	49.177	55.404	-1.733	23.768	29.014	41.81	-0.789	24.467	30.158	43.728	-0.288	22.25	30.989	42.403	0.201	11.898	35.129	-0.875	-0.453
	1.894	10.017	8.018	32.516	-3.279	23.525	18.198	29.827	-3.158	24.433	36.138	33.713	-0.81	22.62	26.902	36.198	-2.538	13.417	38.171	56.895	-0.418	19.621	32.691	37.223	0.116	22.035	37.791	34.697	6.403	36.801	49.177	55.404	-1.733	23.768	29.014	41.81	-0.789	24.467	30.158	43.728	-0.288	22.25	30.989	42.403	0.201	11.898	35.129	-0.875	-0.453
	1.894	10.017	8.018	32.516	-3.279	23.525	18.198	29.827	-6.542	24.433	36.138	33.713	-0.81	22.62	26.309	36.198	-2.538	13.417	38.171	56.895	-0.418	19.621	32.691	37.223	0.116	22.035	37.791	34.697	6.403	36.801	49.177	55.404	-1.733	23.768	29.014	41.81	-0.789	24.467	30.158	43.728	-0.288	22.25	30.989	42.403	0.201	11.898	35.129	-0.875	-0.453
	1.894	10.017	8.018	32.516	-3.279	23.525	18.198	29.827	-6.542	24.433	36.138	33.713	-0.81	22.62	26.309	36.198	-2.271	13.417	38.171	56.895	-0.418	19.621	32.691	37.223	0.116	22.035	37.791	34.697	6.403	36.801	49.177	55.404	-1.733	15.659	29.014	41.81	-0.789	24.467	30.158	43.728	-0.288	22.25	30.989	42.403	0.201	11.898	35.129	-0.875	-0.453
	1.894	10.017	8.018	32.516	5.081	7.456	18.198	29.827	-6.542	24.433	36.138	33.713	-0.81	22.62	26.309	36.198	-2.271	13.417	38.171	56.895	-0.418	19.621	32.691	37.223	0.116	22.035	37.791	34.697	6.403	36.801	49.177	55.404	-1.733	15.659	29.014	41.81	-0.789	24.467	30.158	58.171	-0.288	22.25	30.989	42.403	0.201	11.898	35.129	-0.875	-0.453
	1.894	10.017	24.394	32.516	5.081	7.456	18.198	29.827	-6.542	25.871	36.138	33.713	-0.81	22.62	26.309	36.198	-2.271	13.417	38.171	56.895	-0.418	19.621	32.691	37.223	0.116	22.035	37.791	34.697	6.403	36.801	49.177	55.404	-1.733	15.659	29.014	41.81	-0.789	24.467	30.158	58.171	-0.288	22.25	30.989	42.403	0.201	7.967	35.129	-0.875	-0.453
	1.894	10.017	24.394	32.516	5.081	28.771	18.198	29.827	-5.863	25.871	36.138	33.713	-0.81	22.62	14.317	36.198	-2.516	13.417	38.171	41.179	-0.418	19.621	32.691	37.223	0.116	22.035	37.791	34.697	6.403	36.801	35.076	55.404	-1.733	15.659	28.116	41.81	-0.789	24.467	30.158	58.171	-0.288	22.25	30.989	42.403	-7.403	7.967	35.129	-0.875	-0.453
	1.894	10.017	24.394	32.516	5.081	28.771	18.198	29.827	-5.863	25.871	36.138	33.713	-0.81	22.62	14.317	36.198	-2.516	13.417	38.171	41.179	-0.418	19.621	32.691	37.223	0.116	22.035	37.791	34.697	6.403	36.801	35.076	55.404	-1.733	15.659	28.116	47.799	-0.789	24.467	30.158	58.171	-0.288	22.25	30.989	42.403	-7.403	7.967	35.129	-0.875	-0.453
	1.894	10.017	24.394	32.516	5.081	28.771	18.198	29.827	-5.863	25.871	36.138	33.713	-0.81	22.62	14.317	36.198	-2.516	13.417	38.171	41.179	-0.418	19.621	32.691	37.223	0.116	22.035	37.791	34.697	6.403	36.801	39.182	64.383	-1.733	15.659	28.116	47.799	-0.789	24.467	30.158	58.171	-0.288	22.25	30.989	42.403	-7.403	7.967	35.129	-0.875	-0.453
	1.894	10.017	24.394	32.516	5.081	28.771	18.198	29.827	-5.863	25.871	36.138	33.713	-0.81	22.62	16.533	36.198	-2.516	13.417	38.171	41.179	-0.418	19.621	32.691	37.223	0.116	22.035	37.791	34.697	6.403	36.801	39.182	64.383	-1.733	15.659	28.116	47.799	-0.789	24.467	30.158	58.171	-0.288	22.25	30.989	42.403	-7.403	7.967	35.129	-0.875	-0.453
	1.894	10.017	21.618	25.023	5.081	28.771	18.198	29.827	-5.863	25.871	36.138	33.713	-0.81	22.62	16.533	36.198	-2.516	13.417	38.171	41.179	-0.418	19.621	32.691	37.223	0.116	22.035	37.791	34.697	6.403	36.801	39.182	64.383	-1.733	24.593	28.116	47.799	-0.789	24.467	30.158	56.21	-0.288	22.25	30.989	42.403	-7.403	7.967	35.129	-0.875	-0.453
	1.894	10.017	21.618	25.023	2.445	28.771	18.198	29.827	-5.863	33.556	36.138	33.713	-0.81	22.62	16.533	36.198	1.789	13.417	38.171	41.179	-0.418	19.621	32.691	37.223	0.116	22.035	37.791	34.697	6.403	36.801	39.182	64.383	-1.733	24.593	28.116	47.799	-0.789	24.467	30.158	56.21	-0.288	22.25	30.989	42.403	-7.403	7.967	35.129	-0.875	-0.453
	1.894	10.017	21.618	25.023	2.445	14.384	18.198	29.827	-3.253	33.556	36.138	33.713	-0.81	22.62	16.533	36.198	1.789	13.417	38.171	41.179	-0.418	19.621	32.691	37.223	0.116	22.035	37.791	30.175	6.403	36.801	39.182	64.383	-1.733	22.599	28.116	48.176	-0.789	24.467	30.158	56.21	-0.288	22.25	30.989	42.403	-7.403	7.967	35.129	-0.875	-1.667
	1.894	10.017	21.618	25.023	2.445	14.384	18.198	29.827	-3.253	33.556	36.138	33.713	-0.81	22.62	16.533	36.198	1.789	13.417	38.171	41.179	2.54	19.621	32.691	37.223	0.116	22.035	37.791	30.175	6.403	36.801	39.182	64.383	-1.733	22.599	28.116	48.176	-0.789	24.467	30.158	56.21	-0.288	22.25	30.989	42.403	-7.403	7.967	35.129	-0.875	-1.667
	1.894	10.017	21.618	25.023	2.445	14.384	18.198	29.827	-1.134	33.556	36.138	33.713	-0.81	22.62	16.533	36.198	1.789	13.417	38.171	41.179	2.54	19.621	32.691	37.223	0.116	22.035	37.791	30.175	6.403	36.801	39.182	64.383	2.174	22.599	28.116	48.176	-0.789	24.467	30.158	56.21	-0.288	22.25	30.989	42.403	-7.403	7.967	35.129	-0.875	-1.667
	1.894	10.017	21.618	25.023	2.445	35.958	18.198	29.821	-1.134	33.556	36.138	33.713	-0.81	22.62	16.533	36.198	1.789	13.417	38.171	41.179	-6.25	19.621	32.691	37.223	0.116	22.035	21.771	30.175	6.403	36.801	39.182	64.383	2.174	22.599	28.116	49.472	-0.789	24.467	30.158	56.21	-0.288	22.25	30.989	42.403	-7.403	7.967	35.129	-0.875	-1.667
	1.894	10.017	21.618	25.023	2.445	35.958	18.198	29.821	-1.134	33.556	36.138	29.687	-0.81	22.62	16.533	36.198	1.789	13.417	38.171	30.81	-6.25	13.907	32.691	37.223	0.116	22.035	21.771	30.175	6.403	36.801	39.182	52.458	2.174	22.599	28.116	49.472	-0.789	24.467	30.158	56.21	-0.288	22.25	30.989	42.403	-7.403	7.967	35.129	-0.875	-1.667
	1.894	10.017	21.618	25.023	2.445	35.958	18.198	29.821	-1.134	33.556	36.138	29.687	-0.81	22.62	16.533	36.198	1.789	13.417	38.171	30.81	-6.25	13.907	26.228	37.223	0.116	22.035	13.829	30.175	3.128	36.801	39.182	52.458	2.174	22.599	28.116	49.472	-0.789	24.467	30.158	56.21	-0.288	22.25	30.989	42.403	-7.403	7.967	35.129	-0.875	0.295
	1.894	10.017	21.618	25.023	2.445	35.958	18.198	29.821	-1.134	33.556	36.138	29.687	-17.686	22.62	16.533	36.198	-2.536	13.417	38.171	30.81	-9.027	13.907	26.228	55.329	0.116	22.035	13.829	30.175	3.128	36.801	39.182	52.458	2.174	22.599	28.116	49.472	-0.789	24.467	30.158	56.21	-0.288	22.25	30.989	42.403	-7.403	7.967	35.129	-0.875	0.295
	1.894	10.017	21.618	25.023	0.487	35.958	16.723	29.824	-1.134	33.556	36.138	33.623	-17.686	22.62	16.533	36.198	-2.536	13.417	38.171	30.81	-9.027	13.907	26.228	55.329	0.116	22.035	13.829	30.175	3.128	36.801	39.182	52.458	6.664	22.599	28.116	46.591	-0.789	24.467	30.158	56.21	-0.288	22.25	30.989	35.737	-7.403	7.967	35.129	-0.875	0.295
	1.894	10.017	21.618	25.023	0.487	35.958	16.723	29.824	-1.134	33.556	36.138	33.623	4.095	22.62	16.533	36.198	-2.536	26.862	38.171	30.81	8.035	13.907	26.228	55.329	0.116	22.035	13.829	30.175	3.128	36.801	39.182	52.458	6.664	22.599	28.116	46.591	-0.789	24.467	30.158	56.21	-0.288	22.25	30.989	35.737	-7.403	7.967	35.129	-0.875	0.295
	1.894	10.017	21.618	25.023	1.657	35.958	16.723	29.821	6.773	33.556	36.138	33.623	4.095	22.62	16.533	36.198	-2.536	26.862	38.171	30.81	-1.197	13.907	26.228	55.329	0.116	22.035	13.829	30.175	3.128	36.801	39.182	52.458	6.664	22.599	28.116	46.591	-0.789	24.467	30.158	56.21	-0.288	22.25	30.989	35.737	-7.403	7.967	35.129	-0.875	0.295
	1.894	10.017	21.618	25.023	1.657	35.958	16.723	29.821	6.773	33.556	36.138	33.623	4.095	22.62	16.533	36.198	-0.631	20.201	38.171	30.81	-1.197	13.907	26.228	55.329	0.116	22.035	13.829	29.165	3.128	36.801	39.182	52.458	6.664	22.599	28.848	46.591	-0.789	24.467	30.158	56.21	-0.288	22.25	30.989	35.737	-7.403	7.967	35.129	-0.875	0.295
	1.894	10.017	21.618	25.023	1.657	35.958	16.723	29.821	6.773	33.103	36.138	31.744	4.095	22.62	14.385	36.198	-0.631	20.201	38.171	30.81	-1.197	13.907	26.228	55.329	0.116	22.035	13.829	29.165	3.128	36.801	39.182	52.458	6.664	22.599	28.848	46.591	-0.789	24.467	30.158	56.21	-0.288	22.25	30.989	35.737	-7.403	7.967	35.129	-0.875	-0.587
	1.894	10.017	21.618	25.023	1.657	35.958	16.723	29.821	6.761	33.103	36.138	31.744	4.095	22.62	14.385	36.198	-0.631	20.201	38.171	29.856	-1.197	13.907	26.228	55.329	0.116	18.1	10.307	29.165	3.128	36.801	39.182	52.458	6.664	22.599	28.848	46.591	-0.789	24.467	30.158	56.21	-0.288	22.25	30.989	35.737	-7.403	7.967	35.129	-0.875	-0.587
	1.894	10.017	21.618	26.499	1.657	35.958	16.723	29.821	6.761	33.103	36.138	42.584	4.095	22.62	14.385	36.198	-0.631	20.201	38.171	29.856	2.371	13.907	26.228	55.329	0.116	18.1	10.307	52.685	3.128	36.801	39.182	52.458	6.664	22.599	28.848	46.591	-0.789	24.467	30.158	56.21	-0.288	22.25	29.547	35.737	-7.403	7.967	35.129	-0.875	-0.587
	1.894	10.017	21.618	26.499	1.657	22.982	16.723	29.821	6.761	33.103	36.138	42.584	4.095	22.62	14.385	36.198	-0.631	20.201	38.171	29.856	2.371	13.907	26.228	55.329	0.116	18.1	14.857	52.685	3.128	36.801	39.182	52.458	10.929	22.599	28.848	46.591	-0.789	24.467	30.158	56.21	-0.288	22.25	29.547	35.737	-7.403	7.967	35.129	-0.875	-0.587
	1.894	10.017	21.618	26.499	4.254	22.982	23.47	29.821	6.761	33.103	36.138	42.584	7.342	22.62	14.385	36.198	-0.631	20.201	38.171	45.815	2.371	13.907	26.228	55.329	0.116	18.1	14.857	52.685	3.128	36.801	39.182	52.458	10.929	22.599	29.442	46.591	-0.789	24.467	30.158	56.21	-0.288	22.25	11.21	35.737	-7.403	7.967	35.129	-0.875	-0.587
	1.894	10.017	21.618	26.499	4.254	22.982	23.47	29.821	6.761	22.434	36.138	42.584	7.342	22.62	14.385	36.198	-0.631	20.201	38.171	45.815	2.371	13.907	26.228	55.329	0.116	18.1	14.857	52.685	3.128	36.801	39.182	52.458	-2.034	16.806	29.442	46.591	-0.789	24.467	30.158	44.666	-0.288	22.25	11.21	35.737	-7.403	7.967	35.129	-0.875	-0.587
	1.894	10.353	21.618	26.499	-2.759	22.982	8.285	29.821	6.761	22.434	36.138	42.584	8.574	22.62	14.385	36.198	-0.631	20.201	38.171	45.815	2.371	13.907	26.228	55.329	0.116	18.1	14.857	52.685	3.128	36.801	39.182	52.458	-2.034	16.806	29.442	46.591	-0.789	24.467	30.158	44.666	-0.288	22.25	11.21	35.737	-7.403	18.136	35.129	-0.875	-0.587
	1.894	10.353	21.618	26.499	-2.759	22.982	8.285	29.821	6.761	22.434	36.138	42.584	8.574	22.62	14.385	36.198	-0.631	20.201	28.832	45.815	-15.023	13.907	40.43	55.329	0.116	18.1	14.857	52.685	3.128	36.801	33.99	52.458	-2.034	16.806	29.442	46.591	-0.789	24.467	30.158	44.666	-0.288	22.25	11.21	35.737	-7.403	18.136	35.129	-0.875	-0.587
	1.894	10.353	21.618	26.499	-3.095	22.982	8.285	29.821	6.761	22.434	36.138	42.584	8.574	22.62	14.385	36.198	-0.631	20.201	28.832	45.815	-15.023	9.629	40.43	55.329	0.116	18.1	14.857	52.685	3.128	36.801	33.99	52.458	-2.034	16.806	29.442	46.591	-0.789	24.467	30.158	44.666	-0.288	22.25	11.21	35.737	-7.403	18.136	35.129	-0.875	-0.587
	1.894	10.353	21.618	26.499	-3.095	23.169	8.285	29.821	6.761	22.434	36.138	42.584	8.574	22.62	14.385	36.198	-0.631	20.201	28.832	45.815	-15.023	9.629	40.43	55.329	0.116	18.1	14.857	52.685	3.128	29.277	33.99	52.458	-2.034	16.806	29.442	46.591	-0.789	24.467	30.158	44.666	-0.288	22.25	-1.916	35.737	-7.403	18.136	35.129	-0.875	-0.587
	1.894	10.353	21.618	26.499	-3.095	23.169	8.285	29.821	6.761	22.434	36.138	40.158	8.574	22.62	14.385	36.198	2.474	24.639	28.832	30.811	7.478	9.629	40.43	55.329	0.116	18.1	23.499	55.093	3.128	29.277	35.427	52.458	-2.034	16.806	29.442	46.591	-0.789	24.467	30.158	44.666	-0.288	22.25	-1.916	35.737	-7.403	22.334	35.129	-0.875	-0.587
	1.894	10.353	23.27	26.499	-3.095	23.169	8.285	29.821	6.761	22.434	36.138	40.158	8.574	12.065	14.385	36.198	2.474	24.639	28.832	30.811	7.478	9.629	40.43	55.329	0.116	18.1	17.616	55.093	-0.469	29.277	35.427	52.458	-1.573	16.806	29.442	46.591	-0.789	24.467	30.158	44.666	-0.288	22.25	-1.916	35.737	-7.403	22.334	35.129	-0.875	-0.587
	1.894	10.353	23.27	26.499	-3.095	23.169	8.285	29.821	0.996	22.434	36.138	40.158	-1.432	12.065	14.385	36.198	2.474	24.639	28.832	30.811	7.478	9.629	40.43	55.329	0.116	18.1	17.616	55.093	-0.469	29.277	35.427	52.458	-1.573	16.806	29.442	46.591	-0.789	24.467	30.158	44.666	-0.288	22.25	-1.916	35.737	-7.403	11.462	35.129	-0.875	-0.587
	1.894	8.197	23.27	26.499	-3.095	23.169	8.285	29.821	0.996	22.434	36.138	40.158	-1.432	12.065	14.385	36.198	2.474	24.639	28.832	30.811	7.478	9.629	20.53	55.329	0.116	18.1	17.616	55.093	-0.469	29.277	35.427	52.458	-1.573	16.806	29.442	46.591	-0.789	24.467	30.158	44.666	-0.288	22.25	-1.916	35.737	-7.403	11.462	35.129	-0.875	-0.587
	1.894	8.197	23.27	26.499	-3.095	23.169	8.285	29.821	0.996	22.434	36.138	40.158	-1.432	12.065	14.385	36.198	2.474	24.639	28.832	30.811	7.478	16.42	20.53	55.329	0.116	18.1	17.616	57.038	-0.469	29.277	35.427	52.458	-1.573	16.806	29.442	46.591	-0.789	24.467	30.158	61.522	-0.288	22.25	-1.916	35.737	-7.403	11.462	35.129	-0.875	-0.587
	1.894	8.197	23.27	26.499	-3.095	23.169	8.285	29.821	0.996	22.434	36.138	40.158	-1.432	12.065	14.385	36.198	-0.304	24.639	28.832	30.811	7.478	16.42	20.53	55.329	0.116	18.1	17.616	57.038	-0.469	29.277	43.973	52.458	-1.573	16.806	29.442	46.591	-0.789	24.467	30.158	61.522	-0.288	22.25	-1.916	35.737	-7.403	11.462	35.129	-0.875	-0.587
	1.894	8.197	23.27	26.499	2.095	23.169	8.285	29.821	0.996	22.434	36.138	40.158	-1.432	13.747	14.385	36.198	-0.304	24.639	28.832	30.811	7.478	16.42	20.53	55.329	0.116	18.1	17.616	57.038	-0.469	29.277	30.582	52.458	-1.573	16.806	29.442	46.591	-0.789	24.467	30.158	61.522	-0.288	22.25	-1.916	35.737	-7.403	23.902	35.129	-0.875	-0.587
	1.894	8.197	23.27	26.499	2.095	23.169	8.285	29.821	0.996	22.434	36.138	53.938	-3.51	13.747	14.385	36.198	-0.304	24.639	28.832	30.811	7.478	16.42	27.382	55.329	0.116	18.1	17.616	57.038	-0.469	29.277	30.582	52.458	-1.771	16.806	29.442	46.591	-0.789	24.467	30.158	61.522	-0.288	22.25	-1.916	35.737	-7.403	23.902	35.129	-0.875	-0.587
	1.894	8.197	23.27	26.499	2.095	23.169	8.285	29.821	0.996	22.434	36.138	53.938	-3.51	19.235	14.385	36.198	-0.304	24.639	28.832	41.146	-0.173	16.42	27.382	55.329	0.116	18.1	17.616	57.038	-0.469	29.277	30.582	52.458	-1.771	16.806	29.442	46.591	-0.789	24.467	30.158	61.522	-0.288	22.25	-1.916	35.737	0.237	23.902	35.129	-0.875	-0.587
	1.894	8.197	23.27	27.81	2.095	23.169	8.285	29.821	0.996	22.434	36.138	53.938	-3.51	19.235	14.385	36.198	-0.304	24.639	28.832	41.146	-0.173	16.42	27.382	55.329	0.116	18.1	17.616	57.038	-0.469	29.277	25.061	43.714	-2.993	16.806	29.442	46.591	-0.789	24.467	30.158	61.522	-0.288	22.25	-1.916	35.737	0.237	14.07	35.129	-0.875	-0.587
	1.894	8.197	23.27	27.81	4.531	23.169	8.285	29.821	0.996	22.434	42.622	53.938	-3.51	19.235	14.385	36.198	-0.304	12.853	28.832	41.146	-0.173	16.42	27.382	55.329	0.116	18.1	17.616	44.533	-0.469	29.277	25.061	43.714	-2.993	16.806	29.442	46.591	-0.789	24.467	30.158	61.522	-0.288	22.25	-1.916	35.737	0.237	14.07	35.129	-0.875	-0.587
	1.894	8.197	23.27	27.81	4.531	23.169	23.225	29.821	0.996	22.434	42.622	53.938	-3.51	19.235	14.385	36.198	-0.304	12.853	28.832	41.146	-0.173	16.42	27.382	55.329	0.116	18.1	22.826	44.533	-0.469	29.277	25.061	43.714	-2.993	16.806	29.442	46.591	-0.789	24.467	30.158	61.522	-0.288	22.25	-1.916	37.399	0.237	14.07	35.129	-0.875	-0.587
	1.894	8.197	23.27	27.81	2.566	23.169	23.225	29.821	0.996	22.434	42.622	53.938	-3.51	19.235	14.385	36.198	-0.304	19.463	28.832	54.974	-0.173	16.42	27.382	55.329	0.116	18.1	22.826	44.533	-0.469	29.277	25.061	43.714	-6.385	16.806	29.442	46.591	-0.789	24.467	30.158	61.522	3.808	22.25	-1.916	37.399	0.237	14.07	35.129	-0.875	-0.587
	1.894	8.197	23.27	27.81	2.566	31.896	23.225	29.821	0.996	22.434	42.622	41.36	-3.51	19.235	14.385	36.198	-0.304	19.463	28.832	54.974	-0.173	16.42	27.382	55.329	0.116	18.1	29.827	44.533	-0.469	29.277	25.061	43.714	-6.385	16.806	29.442	48.877	3.029	24.467	30.158	61.522	3.808	22.25	-1.916	37.399	0.237	14.07	35.129	-0.875	-0.587
	1.894	8.197	23.27	27.81	2.566	31.896	23.225	29.821	0.996	22.434	42.622	41.36	-3.51	19.235	14.385	36.198	-0.304	19.463	28.832	54.974	-0.173	16.42	27.382	48.242	0.116	18.1	29.827	44.533	-0.469	29.277	25.061	43.714	-6.385	16.806	29.442	48.877	3.029	24.467	30.158	61.522	3.808	22.25	-1.916	7.37	0.237	14.07	35.129	-0.875	-0.587
	1.894	8.197	23.27	27.81	2.566	31.896	23.225	29.821	0.996	22.434	35.685	41.36	-3.51	19.235	14.385	36.198	-0.304	19.463	28.832	50.365	1.217	16.42	27.382	48.242	0.116	18.1	29.827	44.533	-0.469	29.277	25.061	43.714	-6.385	16.806	29.442	48.877	3.029	24.467	30.158	61.522	3.808	22.25	-1.916	7.37	0.237	14.07	35.129	-0.875	-0.587
	1.894	8.197	23.27	27.81	2.566	31.896	23.225	29.821	0.996	22.434	35.685	41.36	-3.51	19.235	14.385	36.198	-0.304	19.463	28.832	50.365	-2.134	16.42	27.382	48.242	0.116	18.1	29.827	44.533	-0.469	29.277	25.061	43.714	1.627	16.806	29.442	44.001	3.029	24.467	30.158	61.522	10.515	22.25	-1.916	7.37	0.237	14.07	35.129	-0.875	-0.587
	1.894	8.197	25.968	27.81	-0.603	31.896	23.225	29.821	0.996	22.434	44.424	41.36	-3.51	19.235	14.385	36.198	2.048	19.463	32.195	50.365	-2.134	16.42	47.479	48.242	0.116	18.1	29.827	44.533	-0.469	29.277	25.061	43.714	1.627	16.806	29.442	44.001	3.029	24.467	30.158	61.522	10.515	22.25	-1.916	7.37	0.237	14.07	35.129	-0.875	-0.587
	1.894	8.197	25.968	27.81	-0.603	31.896	23.225	29.821	0.996	22.434	44.424	41.36	-3.51	19.235	13.517	36.198	2.048	19.463	32.195	50.365	-2.134	16.42	47.479	48.242	0.116	18.1	29.827	44.533	-0.469	29.277	25.061	43.714	1.627	16.806	29.442	44.001	3.029	24.467	30.158	61.522	10.515	22.25	-1.916	7.37	0.237	14.07	35.129	-0.875	-0.587
	1.894	8.197	25.968	27.81	-0.603	31.896	23.225	29.821	0.996	22.434	44.424	41.36	-3.51	19.235	13.517	36.198	5.973	19.463	32.195	50.365	0.5	16.42	47.479	55.634	0.116	18.1	29.827	44.533	-0.469	29.277	25.061	43.714	1.627	16.806	29.442	44.001	3.029	24.467	30.158	61.522	5.69	22.25	-1.916	7.37	0.237	14.07	35.129	-0.875	-0.587
	1.894	8.197	25.968	27.81	-0.603	31.896	23.225	29.821	0.996	22.434	44.424	41.36	0.214	19.235	13.517	36.198	-5.667	19.463	32.195	34.216	0.5	16.42	47.479	55.634	0.116	18.1	29.827	44.533	-0.469	29.277	25.061	43.714	1.627	16.806	29.442	44.001	3.029	24.467	30.158	61.522	-4.379	22.25	-1.916	7.37	0.237	14.07	35.129	-0.875	-0.587
	1.894	8.197	25.968	26.682	-0.603	31.896	23.225	29.821	0.996	22.434	44.424	41.36	0.214	19.235	13.517	36.198	-5.667	19.463	32.195	34.216	0.5	16.42	47.479	42.448	0.116	18.1	29.827	44.533	-0.469	29.277	25.061	43.714	1.627	16.806	29.442	44.001	3.029	24.467	30.158	59.88	-4.379	22.25	-1.916	7.37	0.237	14.07	35.129	-0.875	-0.587
	1.894	8.197	25.968	26.682	-0.603	31.896	23.225	29.821	0.996	22.434	44.424	41.36	0.214	19.235	13.517	36.198	7.837	19.463	32.195	34.216	0.857	16.42	47.479	42.448	0.116	18.1	29.827	44.533	-0.469	29.277	25.061	43.714	1.627	16.806	29.442	44.001	3.029	24.467	30.158	59.88	-4.379	22.25	-1.916	7.37	0.237	14.07	35.129	-0.875	-0.587
	1.894	8.197	25.968	26.682	-0.603	31.896	23.225	29.821	0.996	22.434	44.424	40.952	6.193	19.235	13.517	36.198	7.837	19.463	32.195	40.854	0.857	16.42	47.479	42.448	0.116	18.1	27.441	44.533	-0.469	29.277	25.061	43.714	1.627	16.806	29.442	44.001	3.029	24.467	30.158	59.88	-4.379	22.25	-1.916	7.37	0.237	14.07	35.129	-0.875	-0.587
	1.894	8.197	16.558	26.682	-0.603	31.896	23.225	29.821	0.996	22.434	44.424	40.952	6.193	19.235	13.517	36.198	-11.405	20.401	32.195	40.854	0.857	16.42	47.479	42.448	0.116	18.1	27.441	44.533	-0.469	29.277	25.061	43.714	1.627	16.806	29.442	44.001	3.029	24.467	30.158	59.88	-4.379	22.25	-1.916	7.37	0.237	14.07	35.129	-0.875	-0.587
	1.894	8.197	16.558	46.353	3.092	31.896	23.225	29.821	-5.97	22.434	44.424	40.952	-8.015	19.235	13.517	36.198	-11.405	20.401	32.195	40.854	0.857	16.42	47.479	42.448	0.116	18.1	27.441	32.224	-0.469	29.277	25.061	43.714	1.627	16.806	29.442	44.001	3.029	24.467	30.158	59.88	-4.379	22.25	-1.916	7.37	0.237	14.07	35.129	-0.875	7.306
	1.894	8.197	16.558	46.353	-2.329	31.896	23.225	29.821	-5.97	22.434	44.424	40.952	-8.015	19.235	13.517	36.198	-11.405	20.401	32.195	46.903	0.857	16.42	47.479	42.448	0.116	18.1	27.441	32.224	-0.469	29.277	25.061	43.714	1.627	16.806	29.442	44.001	3.029	24.467	30.158	59.88	-4.379	22.25	-1.916	7.37	0.237	14.07	35.129	-0.875	7.306
	1.894	8.197	16.558	46.353	-2.329	31.896	23.225	29.821	-5.97	22.434	44.424	40.952	-8.015	19.235	13.517	36.198	-11.405	20.401	32.195	46.903	0.327	16.42	47.479	42.448	0.116	18.1	27.441	32.224	-0.469	29.277	25.061	43.714	1.627	16.806	29.442	44.001	-0.38	24.467	30.158	59.88	-4.379	22.25	-1.916	-7.877	0.237	14.07	35.129	-0.875	7.306
	1.894	8.197	16.558	32.218	-2.329	31.896	23.225	29.821	-5.97	22.434	44.424	59.833	3.79	19.235	12.809	36.198	-11.405	20.401	32.195	46.903	0.327	16.42	47.479	42.448	0.116	18.1	31.784	32.224	-0.469	29.277	25.061	50.783	1.627	16.806	29.442	44.001	-0.38	24.467	30.158	59.88	1.517	22.25	-1.916	-7.877	0.237	14.07	35.129	-0.875	7.306
	1.894	8.197	16.558	32.218	5.348	31.896	23.225	29.821	16.681	22.434	44.424	59.833	3.79	19.235	12.809	36.198	-11.405	19.999	32.195	30.233	0.981	16.42	47.479	42.448	0.116	18.938	31.784	32.224	-0.469	29.277	47.814	50.783	1.627	16.806	29.442	51.669	-0.38	24.467	30.158	59.88	1.517	22.25	-1.916	-7.452	0.237	14.07	35.129	-0.875	-5.787
	1.894	8.197	14.217	32.218	5.348	31.896	23.225	29.821	16.681	22.434	44.424	41.905	3.79	19.235	24.143	36.198	-11.405	19.999	32.195	30.233	0.981	16.42	23.573	42.448	0.116	18.938	31.784	32.224	-0.469	35.365	47.814	50.783	1.627	16.806	29.442	51.669	3.797	24.467	30.158	59.88	1.517	22.25	-1.916	-7.452	0.237	14.07	35.129	-0.875	-5.787
	1.894	8.197	14.217	32.218	3.243	31.896	23.225	29.821	16.681	22.434	44.424	41.905	3.79	19.235	24.143	36.198	-11.405	21.96	32.195	64.976	0.981	16.42	23.573	42.448	0.116	9.616	31.784	32.224	-0.469	35.365	33.486	50.783	1.627	16.806	29.442	51.669	3.797	24.467	30.158	59.88	1.517	22.25	-1.916	-7.452	0.237	14.07	35.129	-0.875	-5.787
	1.894	8.197	14.217	32.218	3.243	31.896	23.225	29.821	16.681	22.434	44.424	35.455	3.79	19.235	24.143	36.198	-11.405	21.96	32.195	64.976	0.981	16.42	23.573	42.448	0.116	9.616	25.093	32.224	-0.469	35.365	33.486	50.783	1.627	16.806	29.442	51.669	3.797	24.467	30.158	33.093	1.517	22.25	-1.916	-7.452	0.237	14.07	35.129	-0.875	2.588
	1.894	8.197	14.217	32.218	3.243	31.896	23.225	29.821	3.486	22.434	44.424	35.455	3.79	19.235	24.143	36.198	4.464	21.96	32.195	64.976	0.981	16.42	23.573	49.242	0.116	9.616	25.093	32.224	-0.469	35.365	33.486	50.783	1.627	16.806	29.442	51.669	3.797	24.467	30.158	33.093	-4.745	22.25	-1.916	-7.452	0.237	14.07	35.129	-0.875	2.588
	1.894	8.197	14.217	32.218	3.243	31.896	23.225	29.821	3.486	22.434	44.424	35.455	3.79	19.235	24.143	36.198	4.464	21.96	32.195	64.976	0.981	16.42	23.573	49.242	0.116	9.616	25.093	32.224	-0.469	35.365	35.689	50.783	3.187	16.806	29.442	51.669	3.797	24.467	30.158	33.093	-4.745	9.547	-1.916	-7.452	0.237	14.07	35.129	-0.875	-8.324
	1.894	8.197	14.217	32.218	3.243	31.896	23.225	29.821	-4.736	22.434	39.203	35.455	3.79	19.235	24.143	36.198	4.464	21.96	32.195	64.976	0.981	16.42	23.573	49.242	0.116	9.616	25.093	36.04	-0.469	35.365	35.689	50.783	3.187	16.806	29.442	51.669	3.797	24.467	30.158	33.093	1.394	9.547	-1.916	-7.452	0.237	3.314	35.129	-0.875	-8.324
	1.894	10.675	14.217	32.218	3.243	31.896	30.518	29.821	-4.736	22.434	39.203	32.555	3.79	19.235	24.143	36.198	4.464	21.96	32.195	64.976	0.981	16.42	23.573	49.242	0.116	15.538	25.093	36.04	-0.469	35.365	37.697	50.783	3.187	16.806	29.442	51.669	3.797	24.467	30.158	53.509	1.394	9.547	-1.916	-7.452	0.237	3.314	35.129	-0.875	-8.324
	1.894	10.675	29.904	32.218	3.243	31.896	30.518	29.821	-4.736	22.434	39.203	32.555	3.79	19.235	24.143	36.198	4.464	21.96	32.195	48.228	0.981	16.42	23.573	49.242	0.116	15.538	25.093	36.04	-0.469	35.365	37.697	50.783	-0.372	16.806	29.442	51.669	3.797	24.467	30.158	53.509	1.394	9.547	-1.916	-7.452	0.237	3.314	35.129	-0.875	-8.324
	1.894	10.675	29.904	30.095	3.243	31.896	30.518	29.821	-4.736	22.434	39.203	37.271	3.79	19.235	24.143	36.198	4.464	16.864	32.195	48.228	0.981	16.42	23.573	49.242	0.116	15.538	25.093	36.04	-0.469	35.365	37.697	50.783	-0.372	16.806	29.442	51.669	3.797	24.467	30.158	53.509	1.394	9.547	-1.916	-7.452	0.237	23.2	35.129	-0.875	-1.87
	1.894	10.675	29.904	30.095	3.243	31.896	29.808	29.821	-4.736	22.434	39.203	37.271	-2.979	19.235	24.143	36.198	4.464	16.864	32.195	48.228	0.981	16.42	30.811	49.242	0.116	15.538	25.093	36.04	-0.469	35.365	37.697	50.783	-0.372	13.126	29.442	51.669	3.797	12.98	30.158	53.509	1.394	9.547	-1.916	-7.452	0.237	23.2	35.129	-0.875	-1.87
	1.894	12.177	41.157	30.095	3.243	31.896	29.808	29.821	-4.736	22.434	39.203	37.271	-2.979	19.235	24.143	36.198	4.464	16.864	32.195	48.228	0.981	16.42	30.811	44.787	0.116	16.898	25.093	36.04	-0.469	19.203	37.697	35.199	-0.372	13.126	29.442	51.669	3.797	12.98	30.158	53.509	1.394	9.547	-1.916	-7.452	0.237	10.843	35.129	-0.875	-1.87
	1.894	12.177	41.157	30.095	-7.014	31.896	29.808	29.821	0.88	22.434	39.203	37.271	-2.979	19.235	24.143	36.198	4.464	16.864	32.195	48.228	0.981	16.42	30.811	44.787	0.116	16.898	25.093	36.04	-0.469	33.525	37.697	51.496	-0.187	13.126	29.442	51.669	3.797	12.98	30.158	53.509	1.394	9.547	-1.916	-7.452	0.237	10.843	35.129	-0.875	6.477
	1.894	12.177	41.157	34.364	-7.014	31.896	29.808	29.821	0.88	22.434	39.203	37.271	-2.979	19.235	24.143	36.198	4.464	16.864	32.195	48.228	0.981	16.42	43.971	44.787	0.116	16.898	25.093	36.04	-0.469	33.525	37.697	51.496	-0.187	13.126	29.442	51.669	3.797	12.98	30.158	53.509	1.394	9.547	-1.916	-7.452	8.299	10.843	35.129	-0.875	6.477
	1.894	12.177	15.316	34.364	-7.014	31.896	29.808	29.821	0.88	22.434	39.203	40.439	-2.979	19.235	24.143	36.198	4.464	16.864	32.195	48.228	0.981	16.42	35.983	44.787	0.116	16.898	25.093	36.04	-0.469	33.525	37.697	51.496	-0.187	13.126	29.442	37.24	3.797	12.98	30.158	39.03	1.394	9.547	-1.916	-7.452	8.299	10.843	35.129	-0.875	6.477
	1.894	12.177	15.316	34.364	-9.5	31.896	29.808	29.821	0.88	22.434	39.203	40.439	-2.979	19.235	24.143	36.198	4.464	16.864	32.195	48.228	0.981	16.42	35.983	44.787	0.116	16.898	25.093	36.04	-0.469	33.525	37.697	51.496	-0.187	13.126	29.442	37.24	3.797	12.98	30.158	39.03	1.394	9.547	-1.916	-7.452	8.299	10.843	35.129	-0.875	6.477
	1.894	17.317	15.316	34.364	-9.5	31.896	29.808	29.821	0.88	22.434	39.203	40.439	-0.008	19.235	24.143	36.198	4.464	16.864	32.195	48.228	0.981	16.42	35.983	44.787	0.116	16.898	25.093	36.04	-0.469	33.525	37.697	51.496	-0.187	13.126	29.442	37.24	3.797	17.484	30.158	39.03	-3.296	-4.054	-1.916	-7.452	8.299	10.843	35.129	-0.875	6.477
	1.894	17.317	15.316	34.364	-9.5	31.896	29.808	29.821	0.88	22.434	39.203	33.995	-0.008	19.235	24.143	36.198	4.464	16.864	32.195	48.228	-1.496	16.42	35.983	54.641	0.116	16.898	25.093	36.04	-0.469	33.525	37.883	51.496	-0.187	13.126	29.442	37.24	3.797	17.484	30.158	39.03	-3.296	-4.054	-1.916	-7.452	8.299	10.843	35.129	-0.875	6.477
	1.894	17.317	15.316	34.364	-9.5	31.896	29.808	29.821	-4.18	22.434	39.203	33.995	-0.008	19.235	24.143	36.198	4.464	16.864	32.195	48.228	-1.496	16.42	35.983	54.641	0.116	16.898	25.093	36.04	-0.469	33.525	37.883	51.496	-0.187	13.126	29.442	42.611	3.797	25.896	30.158	39.03	-3.296	-4.054	-1.916	-7.452	8.299	17.997	35.129	-0.875	6.477
	1.894	17.317	15.316	34.364	-4.02	20.847	29.808	29.822	-4.18	22.434	39.203	33.995	-0.008	19.235	24.143	36.198	4.464	16.864	32.195	48.228	-1.496	-3.023	35.983	54.641	0.116	16.898	25.093	36.04	-0.469	33.525	37.883	33.689	8.17	13.126	29.442	42.611	3.797	25.896	30.158	59.183	-3.296	-4.054	-1.916	-7.452	8.299	17.997	35.129	-0.875	6.477
	1.894	17.317	15.316	34.364	-4.02	20.847	29.808	29.822	-21.875	20.65	41.052	33.995	-0.008	19.235	24.143	36.198	4.464	16.864	32.195	48.228	-1.496	-3.023	35.983	54.641	0.116	16.898	25.093	36.04	-0.469	33.525	37.883	33.689	-8.264	13.126	29.442	42.611	3.797	25.896	30.158	59.183	-3.296	-4.054	-1.916	-7.452	8.299	17.997	35.129	-0.875	6.477
	1.894	8.989	15.316	37.264	-4.02	20.847	29.808	29.822	-21.875	20.65	41.052	33.995	-0.008	19.235	18.575	36.198	4.464	16.864	32.195	48.228	-2.7	-3.023	35.983	44.771	0.116	16.898	25.093	36.04	-0.469	33.525	37.883	33.689	-8.264	13.126	29.442	42.611	-4.265	23.379	30.158	59.183	-3.296	-3.153	-1.916	-7.452	8.299	17.997	35.129	-0.875	6.477
	1.894	8.989	15.316	37.264	-4.02	20.847	29.808	29.822	0.685	20.65	41.052	36.243	-0.008	19.235	18.575	36.198	4.464	21.373	32.195	48.228	-2.7	-3.023	35.983	44.771	0.116	16.898	25.093	36.04	-0.469	33.525	37.883	33.689	2.862	21.231	29.442	42.611	-4.265	23.379	30.158	59.183	-3.296	-3.153	-1.916	-7.452	8.299	17.997	35.129	-0.875	6.477
	1.894	8.989	15.316	37.264	-4.02	20.847	29.814	29.822	0.685	20.65	41.052	36.243	-0.008	19.235	18.158	36.198	-2.667	21.373	32.195	48.228	-2.7	-3.023	35.983	44.771	0.116	16.898	25.093	36.04	-0.469	33.525	28.998	33.689	2.862	21.231	29.442	38.827	-4.265	23.379	30.158	59.183	-3.296	-3.153	-1.916	-9.503	8.299	17.997	35.129	-0.875	6.477
	1.894	8.989	15.316	37.264	-4.02	20.847	29.814	29.822	0.685	20.65	41.052	36.243	-4.1	19.235	18.158	36.198	-2.667	21.373	32.195	48.228	-2.7	-8.825	35.983	44.771	0.116	16.898	25.093	36.04	-0.469	33.525	28.998	34.08	2.862	21.231	29.442	38.827	-4.265	26.185	30.158	59.183	-3.296	-3.153	-1.916	-9.503	8.299	17.997	35.129	-0.875	6.477
	1.894	8.989	31.175	37.264	4.136	20.847	29.814	29.827	0.685	20.65	41.052	36.243	-4.1	19.235	17.68	36.198	-2.667	21.373	32.195	48.228	-0.121	-8.825	35.983	44.771	0.116	16.898	25.093	36.04	-0.469	33.525	28.998	34.08	2.862	21.231	29.442	39.201	-4.265	26.185	30.158	59.183	-3.296	-3.153	-1.916	-9.503	8.299	10.863	35.129	-0.875	6.477
	1.894	8.989	31.175	29.505	4.136	20.847	29.816	29.827	0.685	20.65	41.052	36.243	2.745	19.235	17.68	36.198	-2.667	21.373	32.195	48.228	-0.121	-8.825	35.983	44.771	0.116	16.898	25.093	43.135	-0.469	33.525	28.998	34.08	3.32	21.231	29.442	39.201	-4.265	26.185	30.158	59.183	-3.296	-3.153	-1.916	-9.503	8.299	10.863	35.129	-0.875	6.477
	1.894	8.989	31.175	29.505	4.136	16.912	29.816	29.827	0.685	20.65	41.052	36.243	2.745	19.235	17.68	36.198	-2.667	21.373	32.195	48.228	-0.121	-8.825	35.983	44.771	0.116	16.898	25.093	43.135	-0.469	33.525	28.998	34.08	3.32	21.231	29.442	39.201	-4.265	26.185	30.158	39.027	-3.296	-3.153	-1.916	-9.503	8.299	10.863	35.129	-0.875	6.477
	1.894	8.989	31.175	29.505	4.136	16.912	29.816	29.827	0.685	20.65	41.052	36.243	2.745	19.235	17.68	36.198	6.68	21.373	32.195	48.228	-0.121	-8.825	35.983	44.771	0.116	16.898	25.093	43.135	-0.469	33.525	28.998	34.08	3.32	21.231	29.442	39.201	-4.265	22.202	30.158	39.027	-3.296	-3.153	-1.916	-9.503	8.299	10.863	35.129	-0.875	6.477
	1.894	8.989	34.373	29.505	4.136	16.912	29.816	29.827	0.685	20.65	38.623	35.661	-0.168	19.235	17.68	36.198	6.68	21.373	32.195	48.228	-0.121	-8.825	35.983	44.771	0.116	16.898	25.093	54.515	-0.469	33.525	28.998	34.08	-5.759	21.231	29.442	39.201	2.852	22.202	30.158	39.027	-3.296	-3.153	-1.916	-8.519	8.299	10.863	35.129	-0.875	0.695
	1.894	8.989	34.373	29.505	4.136	16.912	29.816	29.827	0.685	20.65	38.623	35.661	-0.168	19.235	17.68	36.198	-0.349	21.373	32.195	48.228	-0.121	-8.825	35.983	44.771	0.116	16.898	25.093	54.515	-0.469	33.525	28.998	34.08	-5.759	21.231	29.442	39.201	2.852	22.202	30.158	39.027	-3.296	-3.153	-1.916	-8.519	8.299	10.863	35.129	-0.875	0.695
	1.894	8.989	34.373	29.505	4.136	16.912	29.816	29.827	0.685	20.65	38.597	60.277	-0.168	19.235	17.68	36.198	-0.349	21.373	32.195	48.228	-0.121	-8.825	35.983	44.771	0.116	16.042	25.093	54.515	-0.469	33.525	28.998	34.08	-5.759	23.108	29.442	39.201	2.852	22.202	30.158	39.027	-3.296	-3.23	-1.916	-8.519	8.299	10.863	35.129	-0.875	0.695
	1.894	13.891	34.373	29.505	4.136	16.912	29.816	29.827	0.685	20.65	38.597	60.277	-0.168	19.235	17.68	36.198	-0.349	21.373	32.195	48.228	-0.121	-8.825	35.983	44.771	0.116	16.042	25.093	37.985	-0.469	33.525	28.998	34.08	-5.759	23.108	29.442	39.201	2.852	22.202	30.158	37.428	-3.296	-3.23	2.83	-8.519	8.299	10.863	35.129	-0.875	5.432
	1.894	13.891	34.373	29.505	4.136	16.912	29.816	29.827	0.685	20.65	38.597	40.32	-0.168	19.235	17.68	36.198	-0.349	21.373	32.195	48.228	-0.121	-8.825	35.983	44.771	0.116	16.042	25.093	37.985	-0.469	33.525	28.998	34.08	-5.759	23.108	29.442	39.201	2.852	22.202	30.158	37.428	-3.296	-3.23	2.83	-8.519	8.299	10.863	35.129	-0.875	5.432
	1.894	13.891	25.534	29.505	4.136	16.912	29.814	29.827	0.685	20.65	38.597	40.32	-0.168	19.235	17.68	36.198	-0.349	21.373	32.195	39.53	-0.121	-8.825	35.983	44.771	0.116	16.042	25.093	37.985	-0.469	32.329	28.998	34.08	2.148	23.108	29.442	39.201	2.852	22.202	30.158	37.428	-3.296	1.473	2.83	-8.519	8.299	10.863	35.129	-0.875	5.432
	1.894	13.891	25.534	34.504	-22.57	16.912	29.814	24.352	0.685	20.65	38.597	40.32	-0.168	19.235	13.378	36.198	-0.349	21.373	32.195	39.53	1.356	-8.825	35.983	44.771	0.116	16.042	25.093	50.996	-0.469	32.329	28.998	34.08	2.148	23.108	29.442	39.201	2.852	20.6	30.158	46.258	-3.296	1.473	2.83	-7.333	8.299	10.863	35.129	-0.875	5.432
	1.894	13.891	25.534	34.504	-22.57	16.912	29.814	24.352	0.685	20.65	38.597	40.32	-0.168	19.235	13.378	36.198	-0.349	18.706	32.195	47.136	1.356	-11.056	35.983	44.771	0.116	16.042	25.093	50.996	-0.469	32.329	28.998	34.08	2.148	23.108	29.442	39.201	7.141	20.6	30.158	46.258	-3.296	1.473	2.83	-7.333	8.299	10.863	35.129	-0.875	5.432
	1.894	13.891	-5.336	46.89	-22.57	16.912	29.814	24.352	0.685	20.65	38.597	40.32	-0.168	19.235	13.378	36.198	-0.349	18.706	32.195	47.136	1.356	-11.056	35.983	44.771	0.116	16.042	25.093	50.996	-0.469	32.329	28.998	34.08	2.148	23.108	29.442	39.201	7.141	20.6	30.158	46.258	-3.296	9.838	2.83	-7.333	8.299	10.863	35.129	-0.875	3.973
	1.894	13.891	-5.336	46.89	-1.009	16.912	27.406	24.352	0.685	20.65	38.597	40.32	-0.168	19.235	13.378	36.198	-0.349	18.706	32.195	47.136	1.356	-11.056	35.983	44.771	0.116	16.042	25.093	49.327	-0.469	32.329	28.998	34.08	2.148	24.567	29.442	39.201	-0.891	20.6	30.158	46.258	-3.296	9.838	2.83	-7.333	8.299	10.863	35.129	-0.875	3.973
	1.894	13.891	-5.336	46.89	-1.009	16.912	27.406	24.352	0.685	20.65	38.597	40.32	-0.168	19.235	13.378	36.198	-0.349	18.706	32.195	47.136	1.356	-11.056	35.983	44.771	0.116	16.042	25.093	49.327	-0.469	32.329	28.998	34.08	2.148	24.567	29.442	39.201	-0.891	20.6	30.158	46.258	-3.296	9.838	2.83	-7.333	8.299	10.863	35.129	-0.875	3.973
	1.894	13.891	30.499	46.89	-1.009	16.912	27.406	24.352	0.685	20.65	35.894	40.32	-0.168	19.235	12.794	36.198	-0.349	18.706	32.195	58.948	1.356	-13.764	35.983	44.771	0.116	16.042	25.093	49.327	-0.469	32.329	28.998	34.08	2.148	20.506	29.442	39.201	-0.891	20.6	30.158	47.215	-3.296	9.838	2.83	-7.333	8.299	10.863	35.129	-0.875	-3.046
	1.894	13.891	30.499	46.89	-1.009	16.912	27.406	24.352	0.685	14.321	35.894	40.32	-0.168	19.235	12.794	36.198	-0.349	18.706	32.195	58.948	1.356	-13.764	35.983	44.771	0.116	16.042	25.093	49.327	-0.469	32.329	28.998	34.08	2.148	20.506	29.442	39.201	-0.891	20.6	30.158	47.215	-3.296	9.838	2.83	-7.333	8.299	10.863	35.129	-0.875	-3.046
	1.894	13.891	32.332	46.89	8.494	16.912	27.406	24.352	0.685	14.321	35.894	40.32	-0.168	19.235	12.794	36.198	-0.349	18.706	32.195	26.329	1.356	-13.764	28.565	44.771	0.116	16.042	25.093	58.293	-0.469	32.329	42.441	34.08	7.93	20.506	29.442	39.201	-0.891	20.6	30.158	47.215	-3.296	9.838	2.83	-7.333	8.299	10.863	35.129	-0.875	-3.046
	1.894	13.891	32.332	54.411	8.494	16.912	27.406	24.352	0.685	16.94	35.894	40.32	-0.168	19.235	12.794	36.198	-0.349	18.706	32.195	26.329	0.989	-13.764	28.565	44.771	0.116	16.042	25.093	58.293	-0.469	32.208	42.441	34.08	7.93	20.506	29.442	39.201	-0.891	20.6	30.158	47.215	-3.296	23.062	2.83	-7.901	8.299	10.863	35.129	-0.875	-1.85
	1.894	13.891	32.332	54.411	8.494	16.912	27.406	24.352	0.685	16.94	35.894	40.32	-0.168	19.235	12.794	36.198	-0.349	18.706	32.195	26.329	0.989	-13.764	28.565	44.771	0.116	16.042	25.093	58.293	-0.469	32.208	42.441	34.08	7.93	20.506	29.442	39.201	-0.891	20.6	30.158	47.215	-3.296	23.062	2.83	-7.901	8.299	13.519	35.129	-0.875	-1.85
	1.894	13.891	35.278	45.902	8.494	16.912	27.406	24.352	0.685	16.94	13.161	40.32	-0.168	19.235	12.794	36.198	-0.349	18.706	32.195	26.329	-0.896	-13.764	28.565	44.771	0.116	16.042	36.969	37.593	-0.469	32.208	42.441	44.804	7.93	20.506	29.442	39.201	-0.891	20.6	30.158	47.215	-3.296	15.335	2.83	42.528	8.299	13.519	35.129	-0.875	-1.85
	1.894	13.891	35.278	45.902	8.494	16.912	27.406	24.352	0.685	16.94	13.161	40.32	-0.168	19.235	20.264	36.198	-0.349	18.706	32.195	26.329	-0.896	-13.764	28.565	44.771	0.116	16.042	36.969	37.593	-0.469	32.208	42.441	44.804	-12.971	20.506	29.442	39.201	-5.433	20.6	30.158	47.215	-3.296	15.335	2.83	42.528	8.299	13.519	35.129	25.809	-1.85
	1.894	13.891	22.922	45.902	8.494	16.912	27.406	24.352	0.685	16.94	13.161	40.32	-0.168	19.235	20.264	36.198	-0.349	18.706	32.195	26.55	-0.896	-13.764	28.565	44.771	0.116	16.042	36.969	37.593	-0.469	32.208	42.441	25.328	-12.971	20.506	29.442	39.201	-5.433	20.6	30.158	47.215	-3.296	15.335	2.83	42.528	8.299	13.519	35.129	25.809	-1.85
	1.894	13.891	22.922	45.902	8.494	16.912	27.406	24.352	0.685	16.94	13.161	40.32	-0.168	19.235	17.126	36.198	-0.349	18.706	32.195	26.55	-0.896	-13.764	28.565	44.771	0.116	16.042	5.402	37.593	-0.469	32.208	42.441	25.328	-1.19	20.506	29.442	39.201	-5.433	20.6	30.158	47.215	-3.296	15.335	2.83	42.528	8.299	13.519	35.129	25.809	-1.85
	1.894	13.891	22.922	45.902	1.276	16.912	27.406	29.821	0.685	16.94	13.161	40.32	-0.168	19.235	17.126	36.198	-0.349	18.706	32.195	26.55	-0.896	-13.764	28.565	44.771	0.116	16.042	5.402	57.522	-0.469	32.208	42.441	25.328	-1.19	20.506	29.442	39.201	-5.433	20.6	30.158	47.215	-3.296	15.335	2.83	42.528	8.299	27.717	35.129	25.809	-1.85
	1.894	13.891	22.922	45.902	1.276	16.912	27.406	29.821	0.685	16.94	13.161	40.32	-0.168	19.235	15.355	36.198	-0.349	18.706	32.195	26.55	-0.896	-13.764	28.565	44.771	0.116	12.753	5.402	57.522	-0.469	32.208	42.441	25.328	-1.19	20.506	29.442	39.201	-3.283	15.506	30.158	47.215	-3.296	15.335	2.83	47.08	8.299	27.717	35.129	25.809	-1.85
	1.894	13.891	22.922	45.902	1.276	16.912	27.406	29.821	0.685	16.94	13.161	37.434	-0.168	19.235	15.355	33.159	-0.349	18.706	32.195	26.55	-0.896	25.43	28.565	44.771	0.116	12.753	5.402	42.305	-0.469	32.208	42.441	25.328	-1.19	20.506	29.442	39.201	-3.283	15.506	30.158	40.739	-3.296	15.335	2.83	47.08	8.299	27.717	35.129	25.809	-1.85
	1.894	13.891	15.189	45.902	1.276	16.912	29.816	29.821	0.685	16.94	13.161	37.434	-0.168	19.235	15.355	33.159	-0.349	18.706	32.195	26.55	-0.896	25.43	20.451	44.771	0.116	12.753	5.402	42.305	-0.469	32.208	55.807	25.328	-1.19	20.506	29.442	39.201	-3.283	15.506	30.158	40.739	-3.296	15.335	2.83	47.08	8.299	27.717	35.129	25.809	-1.85
	1.894	13.891	15.189	45.902	1.276	16.912	29.816	29.821	0.685	16.94	13.161	37.434	-0.168	19.235	15.355	33.159	-0.349	18.706	32.195	26.55	-0.896	12.972	20.451	44.771	0.116	12.753	5.402	45.131	-0.469	32.208	55.807	25.328	4.34	20.506	29.442	39.201	-3.283	15.506	30.158	41.148	-1.723	15.335	2.83	47.08	8.299	27.717	35.129	25.809	-1.85
	1.894	13.891	15.189	41.589	1.276	16.912	29.816	29.821	0.685	16.94	13.161	37.434	-0.168	19.235	15.355	33.159	-0.349	18.706	32.195	26.55	-0.896	12.972	20.451	44.771	0.116	12.753	5.402	45.131	-0.469	32.208	55.807	25.328	4.34	20.506	29.442	39.201	-3.283	15.506	30.158	41.148	-1.723	15.335	2.83	28.43	8.299	17.109	35.129	25.809	-1.85
	1.894	13.891	27.874	41.589	1.276	16.912	29.816	29.821	0.826	16.94	13.161	37.434	-0.168	19.235	16.81	33.159	-0.349	18.706	32.195	26.55	-0.896	29.336	20.451	44.771	0.116	12.753	15.535	45.131	-0.469	32.208	55.807	25.328	4.34	20.506	29.442	39.201	-3.283	15.506	30.158	41.148	-1.723	15.335	2.83	28.43	8.299	17.109	35.129	25.809	-1.85
	1.894	13.891	27.874	41.589	4.092	16.912	29.816	29.821	0.826	16.94	13.161	37.434	-0.168	19.235	16.81	33.159	-0.349	18.706	32.195	26.55	-0.896	29.336	30.214	43.694	0.116	12.753	15.535	45.131	-0.469	32.208	55.807	25.328	4.34	20.506	29.442	39.201	-3.283	15.506	30.158	41.148	-1.723	15.335	2.83	28.43	8.299	17.109	35.129	25.809	-1.85
	1.894	13.891	27.874	58.24	4.092	16.912	29.816	29.821	0.826	16.94	14.762	37.434	-0.168	19.235	16.81	33.159	-0.349	18.706	32.195	26.55	-0.896	29.336	30.214	43.694	0.116	12.753	15.535	45.131	-0.469	32.208	55.807	38.263	4.34	20.506	29.442	39.201	-3.283	15.506	30.158	41.148	-1.723	15.335	2.83	28.43	8.299	17.109	35.129	25.809	-1.85
	1.894	13.891	27.874	58.24	-14.386	16.912	29.816	29.821	-0.59	16.94	14.762	37.434	-0.168	19.235	16.81	33.159	-0.349	18.706	32.195	26.55	-4.787	29.336	30.214	43.694	0.116	12.753	15.535	54.404	-0.469	32.208	55.807	38.263	4.34	20.506	29.442	39.201	-3.283	15.506	30.158	41.148	-1.723	22.558	2.83	44.628	8.299	17.109	35.129	25.809	-1.85
	1.894	13.891	27.874	58.24	-14.386	16.912	29.816	29.83	-0.59	16.94	28.068	37.434	-0.168	19.235	22.615	33.159	-0.349	18.706	32.195	26.55	-4.787	29.336	30.214	43.694	0.116	12.753	15.535	54.404	-0.469	32.208	55.807	38.263	-0.418	20.506	29.442	39.201	-3.283	15.506	30.158	41.148	-1.723	22.558	2.83	44.628	8.299	17.109	35.129	25.809	-1.85
	1.894	13.891	27.874	39.299	-14.386	33.369	29.816	29.83	-0.59	16.94	28.068	37.434	-0.168	19.235	22.615	33.159	-0.349	18.706	32.195	26.55	-4.787	29.336	30.214	43.694	0.116	12.753	31.352	54.404	-0.469	32.208	55.807	38.263	-0.418	20.506	29.442	39.201	4.757	15.506	30.158	41.148	-1.723	22.558	2.83	44.628	8.299	17.109	35.129	25.809	-1.85
	1.894	13.891	27.874	39.299	-14.386	33.369	29.816	29.821	-0.59	16.94	28.068	37.434	-0.168	19.235	22.615	33.159	-0.349	18.706	32.195	26.55	-4.787	29.336	16.046	43.694	0.116	12.753	31.352	54.404	-0.469	32.208	55.807	38.263	-0.418	20.506	29.442	39.201	4.757	15.506	30.158	41.148	-1.723	22.558	2.83	44.628	8.299	17.109	35.129	25.809	-1.85
	1.894	13.891	20.237	46.358	-14.386	33.369	29.816	29.821	-0.59	16.94	28.068	37.434	-0.168	19.235	22.615	33.159	-0.349	18.706	32.195	26.55	-4.787	29.336	16.046	43.694	0.116	19.48	31.352	54.404	-0.469	32.208	55.807	38.263	-0.418	20.506	29.442	39.201	4.757	15.506	30.158	41.148	-1.723	22.558	2.83	44.628	8.299	17.109	35.129	25.809	-1.85
	1.894	13.891	20.237	46.358	-14.386	33.369	29.816	29.821	-0.59	16.94	10.263	37.434	-0.168	19.235	22.615	33.159	-0.349	18.706	32.195	26.55	-4.787	29.336	16.046	43.694	0.116	19.48	31.352	54.404	-0.469	32.208	55.807	38.263	-0.418	20.506	29.442	39.201	4.757	15.506	30.158	45.214	-2.7	22.558	2.83	44.628	8.299	17.109	35.129	25.809	-1.85
	1.894	13.891	20.237	46.358	-14.386	33.369	29.816	29.821	-0.59	16.94	10.263	37.434	-0.168	19.235	22.615	33.159	-0.349	18.706	32.195	26.55	-4.787	29.336	16.046	43.694	0.116	19.48	50.085	54.404	-0.469	32.208	55.807	38.263	-0.418	20.506	29.442	39.201	4.757	15.506	30.158	45.214	-2.7	22.558	2.83	44.628	8.299	17.109	35.129	25.809	-1.85
	1.894	13.891	20.237	59.433	14.718	33.369	29.816	29.821	-0.59	16.94	21.42	37.434	-0.168	19.235	22.615	33.159	-0.349	18.706	32.195	26.55	-4.787	29.336	16.046	43.694	0.116	19.48	50.085	54.404	-0.469	32.208	40.138	38.263	-0.418	20.506	29.442	39.201	4.757	15.506	30.158	45.214	-2.7	22.558	2.83	44.628	8.299	17.109	35.129	25.809	3.307
	1.894	13.891	20.237	59.433	14.718	27.107	29.816	29.829	-0.59	16.94	21.42	37.434	-0.168	19.235	22.615	33.159	-3.151	18.706	32.195	26.55	-4.787	29.336	16.046	43.694	0.116	19.48	34.18	54.404	-0.469	32.208	40.138	38.263	-0.418	20.506	29.442	39.201	4.757	15.506	30.158	45.214	-2.7	22.558	2.83	44.628	8.299	17.109	35.129	25.809	3.307
	1.894	13.891	23.702	59.433	1.952	27.107	29.816	29.829	-0.59	16.94	21.42	37.434	-0.168	19.235	22.615	36.245	-3.151	18.706	32.195	26.55	-4.787	29.336	16.046	43.694	0.116	19.48	34.18	54.404	-0.469	32.208	40.138	38.263	-0.418	20.506	29.442	39.201	4.757	15.506	30.158	45.214	-2.7	22.558	2.83	44.628	8.299	17.109	35.129	25.809	3.307
	1.894	13.891	23.702	59.433	1.952	27.107	29.816	29.829	-0.59	16.94	21.42	37.434	-0.168	19.235	22.615	36.245	-3.151	18.706	32.195	26.55	-4.787	29.336	16.046	43.694	0.116	19.48	34.18	35.214	-0.469	32.208	40.138	38.263	-0.418	20.506	29.442	39.201	4.757	15.506	30.158	45.214	-2.601	22.558	2.83	33.666	8.299	17.109	35.129	25.809	3.307
	1.894	13.891	15.182	36.499	1.952	27.107	29.816	29.819	-1.955	16.94	17.581	37.434	-0.019	19.235	22.615	36.245	-3.151	18.706	32.195	26.55	-4.787	29.336	16.046	43.694	0.116	19.48	34.18	35.214	-0.469	32.208	40.138	38.263	-0.418	20.506	29.442	39.201	4.757	15.506	30.158	45.214	-2.601	22.558	2.83	33.666	8.299	17.109	35.129	25.809	3.307
	1.894	13.891	15.182	36.499	1.952	28.941	29.81	29.819	-1.955	16.94	17.581	37.434	-0.019	19.235	22.615	36.245	-3.151	18.706	32.195	26.55	-4.787	29.336	16.046	43.694	0.116	19.48	34.18	35.214	-0.469	32.208	40.138	38.263	-0.418	13.542	29.442	46.739	4.757	15.506	30.158	45.214	-2.58	22.558	2.83	33.666	8.299	17.109	35.129	25.809	3.307
	1.894	13.891	14.456	36.499	-6.455	28.941	29.81	29.819	-1.955	16.94	17.581	37.434	-0.019	19.235	22.615	36.245	-3.151	18.706	32.195	26.55	-4.787	29.336	16.046	43.694	0.116	19.48	34.18	35.214	-0.469	32.208	40.138	38.263	-0.418	13.542	29.442	46.739	4.757	15.506	30.158	45.214	-2.58	22.558	-0.335	33.666	8.299	17.109	35.129	25.809	-4.513
	1.894	13.891	14.456	42.053	-6.455	28.941	29.81	29.819	-1.955	16.94	17.581	37.434	-0.019	19.235	22.615	36.245	-3.151	18.706	32.195	26.55	-4.787	29.336	16.046	43.694	0.116	19.48	34.18	34.344	-0.469	32.208	40.138	38.263	-0.418	13.542	29.442	46.739	4.757	15.506	30.158	45.214	-2.58	22.558	-0.335	33.666	8.299	17.109	35.129	25.809	-4.513
	1.894	13.891	21.715	42.053	1.626	28.345	29.813	29.819	-0.236	16.94	17.581	37.434	-0.019	19.235	22.615	36.03	-3.151	18.706	32.195	26.55	-4.787	29.336	16.046	43.694	0.116	19.48	34.18	34.344	-0.469	32.208	40.138	38.263	-0.418	18.513	29.442	46.739	6.311	15.506	30.158	45.214	-2.58	22.558	-0.335	38.743	8.299	17.109	35.129	25.809	-4.513
	1.894	13.891	21.715	42.053	1.626	28.345	29.813	29.819	-0.236	16.94	19.665	37.434	-0.019	19.235	22.615	36.03	-3.151	22.715	32.195	26.55	-4.787	29.336	16.046	43.694	0.116	19.48	34.18	55.564	-0.469	32.208	40.138	38.263	-0.418	18.513	29.442	46.739	6.311	15.506	30.158	45.214	-2.58	22.558	-0.335	38.743	8.299	17.109	35.129	25.809	-4.513
	1.894	13.891	21.715	42.053	-1.066	28.345	29.813	29.819	-0.236	16.94	19.665	36.16	-0.019	19.235	22.615	35.992	-3.151	22.715	32.195	26.55	6.749	29.336	16.046	43.694	-9.748	19.48	34.18	55.564	-0.469	32.208	40.138	38.263	-0.418	18.513	29.442	46.739	6.311	15.506	30.158	45.214	-2.58	21.294	-0.335	38.743	8.299	17.109	35.129	25.809	-4.513
	1.894	13.891	29.869	42.053	-1.066	28.345	29.813	29.819	4.101	16.94	25.707	36.16	-0.019	19.235	22.615	35.992	-3.151	17.765	32.195	26.55	6.749	29.336	16.046	43.694	-9.748	19.48	34.18	55.564	-0.469	32.208	40.138	38.263	-0.418	18.513	29.442	46.739	6.311	15.506	30.158	36.279	-2.506	21.294	-0.335	38.743	8.299	17.109	35.129	25.809	-4.513
	1.894	13.891	29.869	52.238	-1.066	28.345	29.813	29.819	4.101	16.94	25.707	36.16	-0.019	19.235	22.615	32.596	-3.151	17.765	32.195	26.55	6.749	29.336	16.046	43.694	-9.748	19.48	34.18	55.564	-0.469	32.208	40.138	38.263	-0.418	18.513	29.442	46.739	6.311	15.506	30.158	36.279	-2.506	21.294	-0.335	38.743	8.299	17.109	35.129	25.809	-3.312
	1.894	13.891	29.869	52.238	-1.066	28.345	29.813	29.819	4.101	16.94	44.768	36.16	-0.019	19.235	22.615	32.596	-3.151	17.765	32.195	26.55	6.749	29.336	16.046	43.694	-8.808	19.48	34.18	41.128	-0.469	32.208	40.138	38.263	-0.418	18.513	29.442	46.739	6.311	15.506	30.158	36.279	2.944	21.294	-0.335	38.743	8.299	17.109	35.129	25.809	-3.312
	1.894	13.891	29.869	52.238	-1.066	28.345	29.813	29.819	4.101	16.94	44.768	36.16	-0.019	19.235	22.615	32.596	-3.151	17.765	32.195	26.55	6.749	29.336	16.046	43.694	-8.808	10.027	34.18	41.128	-0.469	32.208	40.138	38.263	-0.418	18.513	29.442	46.739	-6.495	15.506	30.158	36.279	2.944	21.294	-0.335	38.743	8.299	17.109	35.129	25.809	-3.312
	1.894	13.891	29.869	52.238	-1.066	28.345	29.813	29.819	4.101	16.94	28.365	36.16	-0.019	10.786	22.615	32.596	-3.151	17.765	32.195	26.55	6.749	16.87	16.046	34.326	5.186	10.027	34.18	41.128	-0.469	32.208	40.138	38.263	-0.418	18.513	29.442	46.739	-6.495	15.506	30.158	36.279	2.944	18.46	-0.335	38.743	8.299	17.109	35.129	25.809	-3.312
	1.894	13.891	29.869	40.474	1.657	28.345	29.813	29.819	4.101	16.94	28.365	36.16	-0.019	10.786	22.615	32.596	-3.151	17.765	32.195	26.55	6.749	16.87	16.046	34.326	5.186	22.521	34.18	41.128	-0.469	32.208	40.138	38.263	-0.418	18.513	29.442	46.739	-6.495	15.506	30.158	36.279	2.944	18.46	-0.335	38.743	8.299	17.109	35.129	25.809	-3.312
	1.894	13.891	29.869	40.474	1.657	28.345	29.813	29.819	4.101	16.94	28.365	36.16	-0.019	10.786	22.615	32.596	-3.151	17.765	32.195	26.55	6.749	16.87	16.046	34.326	5.186	22.521	34.18	41.128	-0.469	32.208	40.138	38.263	-0.418	18.513	29.442	46.739	-2.674	15.506	30.158	36.279	2.944	18.46	-0.335	38.743	8.299	17.109	35.129	25.809	-3.312
	1.894	13.891	29.869	40.474	1.657	28.345	29.813	29.819	4.101	16.94	28.365	36.16	-0.019	26.559	22.615	32.596	-3.151	17.765	32.195	26.55	6.749	16.87	16.046	34.326	2.997	22.521	34.18	41.128	-0.469	32.208	40.138	38.263	-0.418	18.513	29.442	46.739	-2.674	15.506	30.158	36.279	2.944	18.46	-0.335	38.743	8.299	27.58	35.129	25.809	-3.312
	1.894	13.891	29.869	40.474	1.657	28.345	29.813	29.819	4.101	16.94	28.365	36.16	-0.019	26.559	22.615	32.596	-3.151	17.765	32.195	26.55	6.749	16.87	16.046	45.405	2.997	22.521	34.18	41.128	-0.469	32.208	25.503	38.263	-0.418	18.513	29.442	46.739	-2.674	15.506	30.158	36.279	2.944	18.46	-0.335	38.743	-6.119	27.58	35.129	25.809	-3.312
	1.894	13.891	29.869	40.474	1.657	28.345	29.813	29.819	4.101	16.94	28.365	38.349	-0.019	14.85	22.615	32.596	-3.151	17.765	32.195	26.55	6.749	16.87	16.046	45.405	2.997	22.521	34.18	41.128	-0.469	32.208	25.503	38.263	-0.418	18.513	29.442	46.739	-2.674	15.506	30.158	36.279	2.944	18.46	-0.335	38.743	-6.119	25.401	35.129	25.809	-3.312
	1.894	7.829	29.869	40.474	1.657	28.345	29.813	29.819	4.101	16.94	28.365	38.349	-0.019	14.85	22.615	32.596	-3.151	17.765	32.195	26.55	6.749	28.654	16.046	55.091	2.997	21.58	45.704	41.128	-0.469	32.208	25.503	38.263	-0.418	18.513	29.442	46.739	-2.674	15.506	30.158	36.279	2.944	18.46	-0.335	47.213	-6.119	25.401	35.129	25.809	-3.312
	1.894	7.829	29.869	40.474	1.657	28.345	29.813	29.819	1.876	16.94	28.365	38.349	-0.019	14.85	49.327	32.596	-3.151	17.765	32.195	26.55	6.749	28.654	16.046	55.091	2.997	21.58	45.704	41.128	-0.469	32.208	25.503	38.263	-0.418	18.513	29.442	18.667	-2.674	17.86	30.158	36.279	2.944	18.46	-6.624	47.213	-6.119	25.401	35.129	25.809	-3.312
	1.894	7.829	29.869	40.474	1.657	28.345	29.813	29.819	1.876	16.94	28.365	33.069	-0.019	14.85	49.327	32.596	-3.151	17.765	32.195	26.55	6.749	28.654	13.248	55.091	2.997	21.58	40.126	41.128	-0.469	32.208	25.503	38.263	-0.418	18.513	29.442	18.667	-2.674	17.86	30.158	36.279	2.944	18.46	-6.624	46.939	-6.119	25.401	35.129	25.809	-3.312
	1.894	7.829	29.869	40.474	1.657	28.345	29.813	29.82	1.876	25.558	28.365	33.069	-0.019	14.85	49.327	32.596	-3.151	15.477	32.195	26.55	6.749	20.084	13.248	55.091	2.997	21.58	40.126	41.128	-0.469	32.208	25.503	38.263	-0.418	18.513	29.442	18.667	-0.801	17.86	30.158	36.279	2.944	15.789	5.094	46.939	-6.119	25.401	35.129	25.809	-3.312
	1.894	7.829	14.775	40.474	1.657	28.345	29.813	29.82	1.876	23.514	28.365	33.069	-0.019	14.85	23.493	32.596	-3.151	15.477	32.195	26.55	6.749	20.084	13.248	42.115	2.997	21.58	40.126	41.128	-0.469	32.208	25.503	38.263	-0.418	8.713	29.442	22.482	-0.801	17.86	30.158	36.279	2.944	15.789	5.094	46.939	-6.119	20.855	35.129	25.809	-3.312
	1.894	7.829	14.775	40.474	1.657	28.345	29.813	29.82	1.876	23.514	28.365	36.631	-0.019	14.85	23.493	32.596	-3.151	15.477	32.195	26.55	6.749	20.084	14.767	42.115	2.997	21.58	40.611	41.128	-0.469	32.208	25.503	38.263	-0.418	8.713	29.442	22.482	-0.801	17.86	30.158	36.279	2.944	15.789	5.094	46.939	-6.119	20.855	35.129	25.809	-3.312
	1.894	7.829	14.775	40.474	1.657	28.345	29.813	29.82	-0.891	23.514	28.365	36.631	-0.019	14.85	23.493	32.596	-3.151	15.477	32.195	26.55	6.749	20.084	14.767	42.115	2.997	21.58	40.611	41.128	-0.469	32.208	29.461	38.263	-0.418	8.713	29.442	22.482	-0.801	17.86	30.158	36.279	2.944	15.789	5.094	46.939	-6.119	20.855	35.129	25.809	-3.312
	1.894	7.829	14.775	40.474	1.657	28.345	29.813	29.82	-0.891	23.514	28.365	36.631	-0.019	14.85	23.493	32.596	-3.151	15.477	32.195	26.55	6.749	20.084	14.767	42.115	9.826	21.58	40.611	41.128	-0.469	32.208	29.461	38.263	-0.418	8.713	29.442	22.482	-0.801	17.86	30.158	36.279	2.944	15.789	5.094	37.79	-6.119	20.855	35.129	25.809	-3.312
	1.894	7.829	14.775	40.474	1.657	28.345	29.813	29.82	-0.891	23.148	28.365	36.631	-0.019	27.588	28.841	32.596	-3.151	15.477	32.195	26.55	6.749	20.084	14.767	42.115	9.826	21.58	40.611	41.128	-0.469	32.208	29.461	38.263	-0.418	19.365	29.442	22.482	-0.801	17.86	30.158	36.279	2.944	15.789	5.094	37.79	-6.119	20.855	35.129	25.809	-1.823
	1.894	7.829	28.166	40.474	1.657	28.345	29.813	29.82	-0.891	23.148	28.365	36.631	-0.019	27.588	28.841	32.596	-3.151	15.477	32.195	26.55	6.749	12.194	14.767	42.115	9.826	21.58	40.611	41.128	-0.469	32.208	29.461	38.263	-0.418	19.365	29.442	22.482	-0.801	17.86	30.158	36.279	2.944	15.789	5.094	37.79	-6.119	20.855	35.129	25.809	-1.823
	1.894	7.829	28.166	40.474	1.657	28.345	29.813	29.82	-0.891	23.148	28.365	36.631	-0.289	27.588	28.841	32.596	-3.151	15.477	32.195	26.55	6.749	12.194	14.767	50.964	9.826	21.58	40.611	41.128	-0.469	32.208	28.225	38.263	-0.418	19.365	25.016	22.482	-0.801	17.86	30.158	36.279	2.944	15.789	5.094	37.79	-6.119	20.855	35.129	25.809	-1.823
	1.894	7.829	28.166	40.474	1.657	28.345	29.813	29.82	-0.891	21.04	28.365	36.631	-0.289	20.691	36.014	32.596	-3.151	15.477	32.195	26.55	6.749	20.949	14.767	50.964	-2.417	21.58	40.611	41.128	-0.469	32.208	28.225	38.263	-0.418	19.365	25.016	22.482	-0.801	17.86	30.158	36.279	2.944	28.706	5.094	37.79	-6.119	20.855	35.129	25.809	-1.823
	1.894	11.512	28.166	40.474	1.657	28.345	29.813	29.82	-0.891	21.04	28.365	37.341	-0.289	23.251	36.014	32.596	-3.151	15.477	32.195	26.55	6.749	20.949	7.047	50.964	-2.417	21.58	40.611	41.128	-0.469	32.208	28.225	38.263	-0.418	19.365	25.016	22.482	-0.801	17.86	30.158	36.279	2.944	28.706	5.094	33.107	-6.119	28.073	35.129	25.809	-1.823
	1.894	11.512	28.166	40.474	1.657	28.345	29.813	29.82	-0.891	21.04	28.365	37.341	-0.289	23.251	36.014	32.596	-3.151	15.477	32.195	26.55	6.749	25.916	7.047	50.964	-2.417	21.58	40.611	52.393	-0.469	32.208	31.584	38.263	-0.418	19.365	25.016	22.482	-0.801	17.86	30.158	36.279	2.944	14.745	5.094	33.107	-6.119	28.073	35.129	25.809	-1.823
	1.894	11.512	28.166	40.474	1.657	28.345	29.813	29.82	-0.891	21.04	28.365	37.341	-0.289	23.251	36.014	32.596	-3.151	15.477	32.195	26.55	6.749	25.916	14.918	50.964	-2.417	21.58	40.611	52.393	-0.469	32.208	31.584	38.263	-0.418	19.365	25.016	22.482	-0.801	17.86	30.158	36.279	2.944	14.745	5.094	33.107	-6.119	28.073	35.129	25.809	-1.823
	1.894	11.512	28.166	27.261	1.657	28.345	29.813	29.82	-0.891	21.04	28.365	37.341	-0.289	23.251	36.014	32.596	-3.151	15.477	32.195	26.55	6.749	25.916	18.786	50.964	-5.915	21.58	40.611	52.393	-0.469	32.208	31.584	38.263	-0.418	19.365	25.016	22.482	-0.801	17.86	30.158	36.279	2.944	14.745	5.094	33.107	-6.119	28.073	35.129	25.809	-1.823
	1.894	11.512	28.166	27.261	1.657	28.345	29.813	29.82	-0.891	21.04	28.365	37.341	-0.289	23.251	36.014	32.596	-3.151	15.477	32.195	26.55	6.749	25.916	18.786	50.964	-5.915	21.58	40.611	36.262	-0.469	32.208	31.584	38.263	-0.418	19.365	25.016	22.482	-0.801	17.86	30.158	36.279	2.944	14.745	5.094	33.107	-6.119	28.073	35.129	25.809	-1.823
	1.894	11.512	28.166	27.261	-6.644	28.345	29.813	29.82	-0.891	21.04	28.365	37.341	-0.289	23.251	36.014	32.596	-3.151	15.477	32.195	26.55	6.749	25.916	18.786	50.964	-5.915	21.58	40.611	36.262	-0.469	32.208	32.69	38.263	-0.418	22.539	25.016	22.482	-0.801	17.86	30.158	36.279	2.944	14.745	5.094	33.107	-6.119	28.073	35.129	25.809	-1.823
	1.894	11.512	28.166	27.261	-6.644	28.345	29.813	29.82	-0.891	21.04	28.365	37.728	-0.289	23.251	37.266	32.596	-3.151	15.477	32.195	26.55	6.749	25.916	18.786	50.964	-5.915	21.58	40.611	36.262	-0.469	32.208	32.69	38.263	-0.418	22.539	25.016	42.035	-0.801	17.86	30.158	36.279	2.944	14.745	5.094	33.107	-6.119	28.073	35.129	25.809	6.581
	1.894	11.512	28.166	27.261	-6.644	28.345	29.813	29.82	-0.891	21.04	28.365	37.728	-0.289	23.251	37.266	32.596	-3.151	15.477	32.195	26.55	6.749	25.916	18.786	50.964	-5.915	21.58	40.611	36.262	-0.469	32.208	32.69	38.263	-0.418	22.539	25.016	42.035	-0.801	17.86	30.158	36.279	2.944	14.745	-4.429	33.107	-6.119	28.073	35.129	25.809	6.581
	-4.827	11.512	28.166	27.261	-6.391	28.345	29.813	29.82	-0.891	21.04	28.365	37.728	-0.289	23.251	37.266	32.596	-3.151	15.477	32.195	26.55	6.749	25.916	18.786	50.964	6.464	21.58	40.611	36.262	-11.536	32.208	32.69	38.263	-0.418	22.539	25.016	42.035	-0.801	17.86	30.158	36.279	2.944	14.745	-4.429	33.107	-6.119	28.073	35.129	25.809	6.581
	-4.827	11.512	28.166	27.261	-6.391	28.345	29.813	29.82	-0.891	21.04	28.365	37.728	-0.289	23.251	37.266	32.596	-3.151	15.477	32.195	26.55	6.749	25.916	18.786	39.096	6.464	21.58	40.611	36.262	-11.536	32.208	32.69	38.263	-0.418	30.113	25.016	42.035	-0.801	17.86	30.158	36.279	2.944	14.745	-4.429	33.107	-6.119	28.073	35.129	25.809	6.581
	-4.827	11.512	28.166	27.261	1.067	28.345	29.813	29.82	-0.891	28.377	39.907	37.728	-0.289	23.251	37.266	32.596	-3.151	15.477	32.195	26.55	2.144	20.423	19.38	39.096	-5.326	21.58	40.611	30.199	-11.536	32.208	32.69	38.263	-0.418	30.113	25.016	50.742	-0.801	17.86	30.158	34.617	2.944	14.745	-4.429	33.107	-6.119	28.073	35.129	25.809	6.581
	-4.827	11.512	28.166	27.261	1.067	28.345	29.813	29.82	-0.891	28.377	39.907	28.008	-0.289	26.226	37.266	32.596	-3.151	15.477	32.195	26.55	2.144	20.423	19.38	39.096	-5.326	21.58	40.611	30.199	-11.536	32.208	32.69	38.263	-0.418	30.113	25.016	50.742	-0.801	17.86	30.158	34.617	2.944	11.085	-4.429	33.107	-6.119	28.073	35.129	25.809	6.581
	-4.827	11.512	28.166	35.013	1.067	28.345	29.813	29.82	-0.891	28.377	39.907	28.008	-0.289	26.226	20.73	32.596	-3.151	15.477	32.195	26.55	2.144	20.423	19.38	39.096	-5.326	21.58	40.611	30.199	-11.536	32.208	32.133	38.263	-0.418	30.113	25.016	50.742	-0.801	17.86	30.158	34.617	2.944	11.085	-4.429	33.107	-6.119	28.073	35.129	25.809	6.581
	-4.827	11.512	28.166	35.013	1.067	28.345	29.813	47.724	-0.891	28.377	39.907	28.008	-0.289	26.226	20.73	32.596	-3.151	15.477	32.195	26.55	2.144	23.198	19.38	39.096	-5.326	21.58	40.611	30.199	-11.536	32.208	32.133	38.263	-0.418	24.617	25.016	43.539	-0.801	17.86	30.158	34.617	2.944	11.085	-4.429	41.638	-6.119	28.073	35.129	25.809	6.581
	-4.827	11.512	28.166	35.013	5.589	28.345	29.813	47.724	-0.891	28.377	39.907	28.008	-0.289	26.226	20.73	32.596	-3.151	15.477	32.195	26.55	2.144	23.198	19.38	39.096	-5.326	21.58	40.611	30.199	-11.536	32.208	32.133	38.263	-0.418	24.617	25.016	43.539	-0.801	17.86	30.158	34.617	2.944	11.085	-4.429	41.638	3.458	28.073	35.129	25.809	6.581
	-4.827	11.512	28.166	35.013	5.589	28.345	29.813	47.724	-0.891	28.377	39.907	28.008	-0.289	26.226	20.73	32.596	-3.151	15.477	32.195	26.55	2.144	23.198	19.38	39.096	-5.326	21.58	40.611	30.199	-4.023	32.208	32.133	38.263	-0.418	24.617	25.016	43.539	-0.801	17.86	30.158	33.248	2.944	16.868	-4.429	39.826	3.458	28.073	35.129	25.809	6.581
	-4.827	11.512	28.166	35.013	5.589	28.345	29.813	47.724	-0.891	28.377	39.907	28.008	-0.289	26.226	20.73	32.596	-3.151	15.477	32.195	26.55	2.144	23.198	19.38	39.096	-5.326	21.58	40.611	30.199	-4.023	32.208	32.133	38.263	-0.418	24.617	25.016	43.539	-0.801	17.86	30.158	33.248	2.944	16.868	-4.429	39.826	3.458	28.073	35.129	28.819	0.73
	-4.827	11.512	28.166	35.013	4.11	28.345	29.813	47.681	-0.891	28.377	39.907	31.485	-0.289	26.226	20.73	32.596	-3.151	15.477	32.195	26.55	2.144	23.198	21.732	39.096	7.073	21.58	40.611	30.199	-4.023	32.208	32.133	38.263	-0.418	7.423	25.016	43.539	-0.801	17.86	30.158	33.248	2.944	16.868	-4.429	39.826	3.458	28.073	35.129	28.819	0.73
	-4.827	11.512	28.166	35.013	4.11	28.345	29.813	47.681	-0.891	28.377	39.907	31.485	-0.289	26.226	21.355	32.596	-3.151	15.477	32.195	26.152	2.144	23.198	21.732	39.096	7.073	21.58	40.611	30.199	-4.023	32.208	32.133	38.263	-0.418	17.692	25.016	43.539	-0.801	17.86	30.158	33.248	2.944	16.868	-4.429	39.826	-0.85	28.073	35.129	28.819	-2.78
	-4.827	11.512	28.166	35.013	-8.315	28.345	29.813	47.681	-0.891	28.377	39.907	31.485	-0.289	26.226	21.355	32.596	-3.151	23.681	32.195	26.152	2.144	23.198	21.732	39.096	7.073	21.58	40.611	30.186	-4.023	32.208	32.133	38.263	-0.418	17.692	25.016	43.539	-0.801	17.86	30.158	33.248	2.944	16.868	-4.429	38.815	-0.85	28.073	35.129	28.819	-2.78
	-4.827	11.512	28.166	35.013	-8.315	28.345	29.813	47.681	-0.891	28.377	39.907	31.485	-0.289	26.226	21.355	32.596	-3.151	23.681	32.195	26.152	2.144	23.198	21.732	39.096	7.073	21.58	40.611	30.186	-4.023	32.208	32.133	38.263	-0.418	17.692	25.016	43.539	-0.801	17.86	30.158	33.248	2.944	16.868	-4.429	38.815	-0.85	28.073	35.129	28.819	-2.78
	-4.827	11.512	28.166	35.133	-8.315	28.345	29.813	47.681	-0.891	28.377	39.907	68.716	-0.289	26.226	21.355	32.596	-3.151	12.452	32.195	26.152	2.144	23.198	21.732	39.096	7.073	21.58	40.611	30.186	-4.023	32.208	32.133	38.263	-0.418	17.692	25.016	43.539	-0.801	17.86	30.158	33.248	2.944	13.249	-4.429	-0.959	-0.85	28.073	35.129	28.819	-2.78
	-4.827	11.512	10.851	35.133	-5.384	28.345	29.813	47.681	-1.322	28.377	39.907	68.716	-0.289	26.226	21.355	32.596	-3.151	12.452	32.195	26.152	2.144	23.198	21.732	39.096	-18.201	21.58	40.611	30.186	-4.023	32.208	32.133	38.263	-19.398	12.306	25.016	43.539	-0.801	17.86	30.158	33.248	2.944	13.249	-4.429	-0.959	-0.85	28.073	35.129	28.819	-2.78
	-1.904	11.512	10.851	35.133	-5.384	28.345	29.813	47.681	-1.322	28.377	39.907	68.716	-0.289	26.226	21.355	32.596	-3.151	12.452	32.195	26.152	2.144	23.198	21.732	39.096	-18.201	21.58	40.611	30.186	-4.023	32.208	32.133	38.263	-19.398	12.306	25.016	43.539	-0.801	17.86	30.158	33.248	2.944	13.249	-4.429	-0.959	-0.85	28.073	35.129	28.819	-2.78
	-1.904	11.512	10.851	35.309	-5.384	28.345	29.813	47.681	-1.322	28.377	39.907	68.716	-0.289	26.226	21.355	32.596	-3.151	12.452	32.195	26.152	2.144	23.198	21.732	39.096	3.066	21.58	40.611	30.186	-4.023	32.208	32.133	38.263	-5.946	12.306	25.016	43.539	-0.801	16.304	30.158	35.316	2.944	13.249	-4.429	-0.959	-0.85	28.073	35.129	28.819	-2.78
	-1.904	11.512	20.16	35.309	-5.384	28.345	29.813	47.681	-1.322	28.377	39.907	63.099	-0.289	26.226	21.355	32.596	-3.151	12.452	32.195	26.152	2.144	23.198	21.732	39.096	3.066	21.58	40.611	30.186	-4.023	32.208	27.504	38.263	5.529	12.306	25.016	43.539	-0.801	16.304	30.158	35.316	2.944	13.249	-4.429	-0.959	-0.85	28.073	35.129	28.819	3.83
	-1.904	11.512	20.16	35.309	-5.384	28.345	29.813	47.681	-1.322	28.377	39.907	63.099	-0.289	19.328	16.898	32.596	-3.151	12.452	32.195	26.152	2.144	23.198	21.732	39.096	3.066	21.58	40.611	28.493	-1.334	32.208	27.504	38.263	5.529	12.306	25.016	43.539	-0.801	16.304	30.158	35.316	2.944	13.249	-4.429	-0.959	-0.85	28.073	35.129	28.819	3.83
	-1.904	11.512	20.16	35.309	-5.384	28.345	29.813	47.681	-1.322	28.377	39.907	63.099	-0.289	19.328	16.898	32.596	-3.151	12.452	32.195	26.152	2.144	23.198	21.732	39.096	3.066	21.58	40.611	28.493	-1.334	32.208	24.814	38.263	1.091	12.306	25.016	43.539	-0.801	16.304	30.158	35.256	2.944	13.249	-4.429	-0.959	-0.85	28.073	35.129	28.819	3.83
	-1.904	11.512	20.16	35.309	-5.384	28.345	29.813	47.681	-1.322	28.377	35.675	63.099	-0.289	19.328	18.321	32.596	-3.151	12.452	32.195	26.152	2.144	23.198	21.732	39.096	3.066	21.58	40.611	21.246	-1.334	32.208	24.814	38.263	1.091	15.083	25.016	43.539	-0.801	16.304	30.158	35.256	2.944	13.249	-4.429	-0.959	-0.85	28.073	35.129	28.819	3.83
	-1.904	11.512	26.895	35.029	-5.384	28.345	29.813	47.681	-1.322	28.377	35.675	63.099	-0.289	19.328	18.321	32.596	-3.151	9.806	32.195	26.152	2.144	23.198	21.732	39.096	3.066	21.58	40.611	21.246	-1.334	32.208	24.814	38.263	1.091	15.083	25.016	43.539	-0.801	16.304	30.158	35.256	2.944	13.249	-4.429	-0.959	-0.85	28.073	35.129	28.819	3.83
	-1.904	11.512	26.895	35.029	-5.384	28.345	29.813	47.681	-1.322	28.377	26.167	63.099	-0.289	19.328	18.321	32.596	-8.954	9.806	32.195	26.152	2.144	23.198	21.732	39.096	3.066	21.58	40.611	21.246	-1.334	32.208	24.378	38.263	1.091	15.083	25.016	43.539	-0.801	16.304	30.158	35.256	2.944	13.249	-4.429	-0.959	-0.85	28.073	35.129	28.819	3.83
	-1.904	11.512	26.895	35.029	-5.384	28.345	29.813	47.681	-1.322	28.377	26.167	63.099	-0.289	19.328	18.321	32.596	-8.954	9.806	32.195	26.152	2.144	23.198	21.732	39.096	3.066	21.58	40.611	50.034	8.821	32.208	24.378	38.263	1.091	15.083	25.016	54.475	-0.801	10.943	30.158	35.256	2.944	13.249	-4.429	-0.959	-0.85	28.073	35.129	28.819	3.83
	-1.904	11.512	26.895	35.029	-5.384	28.345	29.813	47.681	-1.322	28.377	26.167	63.099	-0.289	19.328	18.321	32.596	-1.391	9.806	32.195	26.152	2.144	23.198	21.732	39.096	5.55	21.58	40.611	50.034	8.821	32.208	24.378	38.263	1.091	15.083	25.016	54.475	-0.801	10.943	30.158	35.256	2.944	13.249	-4.429	-0.959	-0.85	28.073	35.129	28.819	3.83
	-1.904	11.512	26.895	35.029	1.03	28.345	29.813	47.681	-1.322	28.377	26.167	63.099	-0.289	19.328	18.321	32.596	-1.391	9.806	32.195	26.152	2.144	23.198	21.732	44.063	5.55	21.58	40.611	50.034	8.821	32.208	24.378	38.263	13.25	15.083	25.016	29.875	-0.801	10.943	30.158	35.256	2.944	13.249	-4.429	-0.959	-0.85	28.073	35.129	28.819	3.83
	-1.904	11.512	26.895	35.029	1.03	28.345	29.813	47.681	-1.322	28.377	26.167	63.099	-0.289	19.328	18.321	32.596	-1.391	9.806	32.195	26.152	2.144	23.198	21.732	44.063	5.55	21.58	40.611	50.034	8.821	32.208	24.378	38.263	13.25	15.083	25.016	29.875	-0.801	10.943	30.158	35.256	2.944	13.249	-4.429	-0.959	-0.85	28.073	35.129	28.819	3.83
	-1.904	11.512	26.895	35.029	1.03	28.345	29.813	47.681	-1.322	28.377	26.167	63.099	-0.289	20.996	18.321	32.596	-1.391	9.806	32.195	26.152	2.144	23.198	21.732	44.063	5.55	21.58	40.611	50.034	-0.731	32.208	24.378	38.263	-1.119	15.083	25.016	29.875	-0.801	10.33	30.158	35.256	2.944	13.249	-4.429	-0.959	-0.85	28.073	35.129	28.819	3.83
	-1.904	11.512	26.895	35.029	1.03	28.345	29.813	47.681	1.263	28.377	26.167	24.746	-0.289	20.996	18.321	32.596	0.545	9.806	32.195	26.152	2.144	23.198	21.732	44.063	5.55	21.58	40.611	50.034	-0.731	32.208	24.378	38.263	-1.119	15.083	25.016	29.875	-0.801	10.33	30.158	35.256	2.944	13.249	-4.429	-0.959	-0.85	28.073	35.129	28.819	3.83
	-1.904	11.512	26.895	35.029	1.03	28.345	29.813	47.681	1.263	28.377	26.167	24.746	-0.289	20.996	18.321	32.596	0.545	9.806	32.195	26.152	2.144	23.198	21.732	44.063	5.55	21.58	40.611	50.034	-0.731	32.208	24.378	44.542	-1.119	15.083	25.016	29.875	-0.801	10.33	30.158	35.256	2.944	13.249	-5.2	-0.959	-0.85	28.073	35.129	28.819	3.83
	-1.904	11.512	26.895	35.029	1.03	28.345	29.813	47.681	1.263	28.377	26.167	24.746	-0.289	20.996	18.321	32.596	-5.101	9.806	32.195	26.152	2.144	23.198	21.732	41.847	5.55	21.58	40.611	50.034	-0.731	32.208	24.378	44.542	-1.119	15.083	25.016	29.875	-0.801	10.33	30.158	35.256	2.944	13.249	-5.2	-0.959	-0.85	28.073	35.129	28.819	3.83
	-1.904	11.512	26.895	35.029	1.03	28.345	29.813	47.681	1.263	28.377	26.167	24.746	-0.289	20.996	18.321	32.596	-5.101	9.806	32.195	26.152	2.144	23.198	21.732	41.847	5.55	21.58	40.611	50.034	-0.731	32.208	24.378	44.542	-1.119	15.083	25.016	29.05	-0.801	10.33	30.158	35.256	2.944	13.249	-5.2	-0.959	-0.85	28.073	35.129	28.819	3.83
	-1.904	11.512	26.895	35.029	1.03	28.345	29.813	47.681	1.263	28.377	35.029	24.746	-0.289	20.996	18.321	32.596	-5.101	9.806	32.195	26.152	2.144	23.198	21.732	41.847	5.55	21.58	40.611	50.034	0.915	32.208	24.378	44.542	-1.119	15.083	25.016	29.05	-0.801	10.33	30.158	35.256	2.944	13.249	-5.2	-0.959	-0.85	28.073	35.129	28.819	3.83
	-1.904	11.512	26.895	35.029	1.03	28.345	27.986	47.681	1.263	28.377	35.029	24.746	-0.289	20.996	18.321	32.596	2.936	9.806	32.195	26.152	2.144	23.198	21.732	41.847	5.55	9.211	40.611	50.034	0.915	32.208	24.378	44.542	-1.119	15.083	25.016	29.05	-0.801	10.33	30.158	35.256	2.944	13.249	-5.2	-0.959	-0.85	28.073	35.129	28.819	3.83
	-1.904	11.512	34.473	35.029	1.382	28.345	27.986	47.681	1.263	28.377	35.029	24.746	-0.289	20.996	45.389	32.596	2.936	9.806	32.195	26.152	2.144	23.198	21.732	41.847	5.55	9.211	40.611	50.034	0.915	32.208	24.378	44.542	-1.119	15.083	25.016	29.05	-0.801	10.33	30.158	35.256	2.944	13.249	-5.2	-0.959	-0.85	28.073	35.129	28.819	3.83
	-1.904	10.961	34.473	35.029	1.382	28.345	27.986	47.681	-0.522	28.377	35.029	24.746	-0.289	20.996	45.389	32.596	2.936	9.806	32.195	26.152	2.144	23.198	21.732	41.847	5.55	9.211	40.611	50.034	0.915	32.208	24.378	44.542	-1.119	15.083	25.016	29.05	-0.801	10.33	30.158	30.432	2.944	13.249	-5.2	-0.959	-0.85	28.073	35.129	28.819	3.83
	-1.904	10.961	34.473	35.029	1.382	28.345	27.986	47.681	-0.522	28.377	35.029	24.746	-0.289	20.996	45.389	32.596	2.936	9.806	32.195	26.152	2.144	23.198	21.732	41.847	5.55	9.211	40.611	50.034	-15.112	32.208	24.378	44.542	-1.119	15.083	25.016	29.05	-0.801	10.33	30.158	30.432	2.944	13.249	-5.2	-0.959	-0.85	28.073	35.129	28.819	3.83
	-1.904	10.961	34.473	35.029	1.382	28.345	27.986	47.681	-0.522	28.377	35.029	24.746	-0.289	20.996	45.389	32.596	2.936	9.806	32.195	26.152	2.144	23.198	21.732	41.847	-1.072	21.871	40.611	50.034	-15.112	32.208	24.378	58.858	-1.119	15.083	25.016	29.05	-0.801	10.33	30.158	30.432	2.944	13.249	-5.2	-0.959	-0.85	28.073	35.129	28.819	1.088
	-1.904	10.961	34.473	35.029	2.336	28.345	27.986	47.681	-0.522	28.377	35.029	24.746	-0.289	20.996	45.389	32.596	2.936	10.262	32.195	26.152	2.144	23.198	21.732	36.406	-1.072	21.871	40.611	50.034	-15.112	32.208	24.378	58.858	2.633	15.083	25.016	29.05	-0.801	10.33	30.158	30.432	2.944	13.249	-5.2	-0.959	-0.85	28.073	35.129	28.819	1.088
	-1.904	10.961	34.473	35.029	2.336	28.345	29.811	47.681	-0.522	28.377	35.029	24.727	-0.289	20.996	45.389	32.596	2.936	10.262	32.195	26.152	2.144	23.198	21.732	36.406	-1.072	21.871	40.611	50.034	3.195	32.208	24.378	58.858	2.633	15.083	25.016	29.05	-0.801	10.33	30.158	30.432	2.944	13.249	-5.2	-0.959	-0.85	28.073	35.129	28.819	-9.938
	-1.904	10.961	34.473	35.029	2.336	28.345	29.811	47.681	-0.522	28.377	35.029	24.727	-0.289	20.996	45.389	32.596	2.936	10.262	32.195	26.152	2.144	23.198	21.732	36.406	-1.072	26.832	40.611	50.034	3.195	32.208	24.378	42.202	2.633	15.083	25.016	29.05	-0.801	10.33	30.158	30.432	2.944	13.249	-5.2	-0.959	-0.85	28.073	35.129	28.819	-9.938
	-1.904	10.961	34.473	42.984	2.336	28.345	29.811	47.681	-0.776	28.377	35.029	24.727	-0.289	20.996	44.879	32.596	2.936	10.262	32.195	26.152	2.144	23.198	21.732	36.406	4.952	16.284	40.611	50.034	3.195	32.208	24.378	42.202	2.633	15.083	25.016	29.05	-0.801	10.33	30.158	30.432	2.944	13.249	-5.2	-0.959	-0.85	28.073	35.129	28.819	-9.938
	-1.904	10.961	34.473	42.984	2.336	28.345	29.811	47.681	-0.776	28.377	35.029	24.727	-0.289	20.996	44.879	32.596	2.936	10.262	32.195	26.152	2.144	23.198	21.732	36.406	4.952	16.284	40.611	50.034	3.195	32.208	24.378	42.202	2.633	15.083	25.016	21.894	-0.801	10.33	30.158	30.432	2.944	13.249	-5.2	-0.959	-0.85	28.073	35.129	28.819	-6.117
	-0.779	10.961	34.473	51.861	2.336	28.345	29.811	47.681	-0.776	28.377	35.029	24.727	-0.289	20.996	44.879	32.596	2.936	18.309	32.195	26.152	2.144	23.198	21.732	34.779	4.952	16.284	40.611	50.034	3.195	32.208	24.378	42.202	2.633	15.083	25.016	21.894	-0.801	10.33	35.188	30.432	2.944	13.249	-5.2	-0.959	-0.85	28.073	35.129	28.819	-6.117
	-0.779	10.961	34.473	51.861	2.336	28.345	29.811	47.956	-0.776	28.377	35.029	24.727	-0.289	20.996	44.879	32.596	2.936	18.309	32.195	26.152	2.144	23.198	21.732	34.779	5.145	16.284	40.611	50.034	3.195	32.208	24.378	42.202	2.633	15.083	25.016	21.894	-0.801	10.33	35.188	30.432	2.944	13.249	-5.2	-0.959	-0.85	28.073	35.129	28.819	-6.117
	-0.779	10.961	34.473	34.38	2.336	28.345	29.811	47.956	-0.776	28.377	35.029	24.727	-0.289	20.996	44.879	32.596	2.936	18.309	32.195	26.152	2.144	21.234	21.732	34.779	5.145	16.284	40.611	50.034	3.195	32.208	24.378	42.202	2.633	15.083	25.016	21.894	-0.801	10.33	35.188	30.432	2.944	13.249	-5.2	-0.959	-0.85	28.073	35.129	28.819	-6.117
	-0.779	10.961	34.473	34.38	2.336	28.345	29.811	47.956	-0.776	28.377	35.029	24.727	-0.289	20.996	44.879	32.596	2.936	7.633	32.195	26.152	2.144	21.234	21.732	34.779	5.145	16.284	40.611	50.034	3.195	32.208	24.378	42.202	2.633	15.083	25.016	30.975	-0.801	10.33	35.188	30.432	2.944	13.249	-5.2	-0.959	-0.85	28.073	35.129	28.819	2.034
	-0.779	10.961	34.473	43.441	2.336	28.345	29.811	47.956	-0.776	28.377	35.029	24.741	-0.289	20.996	44.879	32.596	2.936	7.633	32.195	26.152	2.144	21.234	21.732	34.779	5.145	16.284	40.611	50.034	3.195	32.208	24.378	42.202	2.633	15.083	25.016	30.975	-0.801	10.33	35.188	30.432	2.944	13.249	-5.2	-0.959	-0.85	28.073	35.129	28.819	2.034
	-0.779	10.961	34.473	43.441	2.336	28.345	29.811	47.956	-0.776	28.377	35.029	24.741	-0.289	20.996	44.879	32.596	2.936	13.088	32.195	26.152	2.144	21.234	21.732	34.779	-4.32	10.691	40.611	50.034	3.195	32.208	24.378	42.202	2.633	15.083	25.016	30.975	-0.801	10.33	35.188	30.432	2.944	13.249	-5.2	-0.959	-0.85	28.073	35.129	28.819	2.034
	-0.779	10.961	34.473	43.441	2.336	28.345	29.811	47.956	-0.776	28.377	35.029	24.741	-0.289	20.996	44.879	32.596	2.936	13.088	32.195	26.152	2.144	21.234	21.732	34.779	-4.32	10.691	40.611	50.034	3.195	32.208	24.378	42.202	2.633	15.083	25.016	30.975	-0.801	10.33	35.188	30.432	2.944	13.249	-5.2	-0.959	-0.85	28.073	35.129	28.819	2.034
	-0.779	10.961	34.473	41.001	2.336	28.345	29.816	47.956	-0.776	28.377	35.029	20.663	-0.289	23.636	31.195	32.596	2.936	13.088	32.195	26.152	2.144	23.033	21.732	34.779	-4.32	10.691	40.611	50.034	3.195	32.208	24.378	42.202	2.633	15.083	25.016	30.975	-0.801	10.33	35.188	30.432	2.944	13.249	-5.2	-0.959	-0.85	28.073	35.129	28.819	2.034
	-0.779	10.961	32.795	41.001	2.336	28.345	29.816	47.956	-0.776	28.377	35.029	20.663	-0.289	23.636	31.195	32.596	2.936	19.348	32.195	26.152	2.144	23.033	21.732	34.779	-4.32	10.691	40.611	61.925	3.195	32.208	24.378	42.202	2.633	15.083	25.016	30.975	-0.801	10.33	35.188	30.432	2.944	13.249	-5.2	-0.959	-0.85	28.073	35.129	28.819	2.034
	-0.779	10.961	32.795	32.15	2.336	28.345	29.816	47.955	-0.776	28.377	35.029	20.663	-0.289	23.636	31.195	32.596	2.936	19.348	32.195	26.152	2.144	23.033	21.732	34.779	-4.32	10.691	40.611	61.925	3.195	32.208	23.224	42.202	2.633	15.083	25.016	30.975	-0.801	10.33	35.188	30.432	2.944	13.249	-5.2	-0.959	-0.85	28.073	35.129	28.819	2.034
	-0.779	10.961	32.795	32.15	2.336	28.345	29.816	47.955	-0.776	28.377	35.029	20.663	-0.289	23.636	31.195	32.596	2.936	19.348	32.195	26.152	2.144	23.033	21.732	40.286	-4.32	10.691	40.611	48.416	4.283	32.208	23.224	42.202	2.633	15.083	25.016	30.975	-0.801	10.33	26.486	30.432	2.944	13.249	-5.2	-0.959	-0.85	28.073	35.129	28.819	2.034
	-0.636	10.961	32.795	52.659	2.336	28.345	29.816	47.955	-0.776	28.377	35.029	20.663	-0.289	23.636	31.195	32.596	2.936	12.536	32.195	26.152	2.144	23.033	21.732	40.286	-6.632	10.691	40.611	48.416	4.283	32.208	23.224	42.202	2.633	15.083	25.016	28.948	-0.801	10.33	26.486	30.432	2.944	13.249	-5.2	-0.959	-0.85	28.073	35.129	28.819	2.034
	-0.636	10.961	32.795	52.659	2.336	28.345	29.816	47.955	-0.776	28.377	35.029	20.663	-0.289	23.636	31.195	32.596	2.936	12.536	32.195	26.152	2.144	23.033	21.732	40.286	-6.632	16.002	40.913	48.416	4.283	32.208	23.224	42.202	2.633	15.083	25.016	28.948	-0.801	10.33	26.486	30.432	2.944	13.249	-5.2	-0.959	-0.85	28.073	35.129	28.819	-10.747
	-0.636	10.961	32.795	52.659	2.336	28.345	29.816	47.955	-0.776	28.377	35.029	20.663	-0.389	23.636	31.195	32.596	2.936	12.536	32.195	26.152	2.144	23.033	21.732	40.286	-6.632	16.002	40.913	48.416	4.283	32.208	23.224	42.202	2.633	15.083	25.016	28.948	-0.801	10.33	26.486	30.432	2.944	13.249	-5.2	-0.959	-0.85	28.073	35.129	28.819	-10.747
	-0.636	10.961	32.795	48.369	0.088	28.345	29.816	47.955	-0.776	28.377	35.029	20.663	-0.389	23.636	31.195	32.596	2.936	17.087	32.195	24.821	2.144	13.93	21.732	40.286	-6.632	16.002	40.913	48.416	4.283	32.208	23.224	42.202	2.633	15.083	25.016	28.948	-0.801	10.33	26.486	30.432	2.944	13.249	-5.2	-0.959	-0.85	28.073	35.129	28.819	-8.58
	-0.636	10.961	32.795	48.369	0.088	28.345	29.816	47.586	-0.776	28.865	35.029	20.663	-0.389	23.636	31.195	32.596	2.936	17.087	32.195	24.821	2.144	13.93	21.732	40.286	0.703	16.002	30.983	48.416	4.283	32.208	23.224	42.202	2.633	15.083	25.016	28.948	-0.801	10.33	26.486	30.432	2.944	13.249	-5.2	-0.959	-0.85	28.073	35.129	28.819	-8.58
	-0.636	10.961	32.795	62.479	0.088	28.345	29.816	47.586	-0.776	28.865	35.029	20.663	-0.389	23.636	27.988	32.596	2.936	17.087	32.195	26.692	2.144	13.93	21.732	40.286	0.703	16.002	30.983	48.416	4.283	32.208	23.224	42.202	2.633	15.083	25.016	28.948	-0.801	10.33	26.486	30.432	2.944	13.249	-5.2	-0.959	-0.85	28.073	35.129	28.819	-0.271
	-0.636	10.961	32.795	62.479	0.088	28.345	29.816	47.586	-0.776	28.865	35.029	20.663	-0.389	23.636	27.988	32.596	2.936	17.087	32.195	26.692	2.144	13.93	21.732	40.286	0.703	16.002	30.983	48.416	-5.864	32.208	23.224	42.202	2.633	15.083	25.016	28.948	-0.801	10.33	26.486	30.432	2.944	13.249	-5.2	-0.959	-0.85	28.073	35.129	28.819	-0.271
	-0.636	10.961	32.795	62.479	0.088	28.345	29.816	47.586	-0.776	28.865	35.029	20.663	-0.389	23.636	27.988	32.596	2.936	17.087	32.195	26.692	2.144	13.93	21.732	41.401	-6.491	16.002	30.983	48.416	-5.864	32.208	23.224	42.202	2.633	15.083	25.016	28.948	-0.801	10.33	26.486	30.432	2.944	13.249	-5.2	-0.959	-0.85	28.073	35.129	28.819	-0.271
	-0.636	10.961	32.795	62.479	0.088	28.345	29.816	47.586	-0.776	28.865	35.029	20.663	-0.389	23.636	27.988	32.596	2.936	17.087	32.195	26.692	2.144	13.93	21.732	41.401	-6.491	16.002	30.983	48.416	-5.864	32.208	23.224	42.202	-3.981	15.083	25.016	28.948	-0.801	10.33	26.486	30.432	2.944	13.249	-5.2	-0.959	-0.85	28.073	40.433	28.819	-0.271
	-0.636	10.961	32.795	62.479	0.088	28.345	28.604	47.586	-0.776	28.865	35.029	20.663	-0.389	23.636	27.988	32.596	2.936	17.087	32.195	26.692	2.144	26.055	21.732	41.401	-22.764	16.002	30.983	48.416	-5.864	32.208	23.224	42.202	-3.981	15.083	25.016	28.948	-0.801	10.33	26.486	30.432	2.944	13.249	-5.2	-0.959	-13.088	28.073	40.433	28.819	-0.271
	-0.636	10.961	25.108	62.479	0.088	28.345	28.604	47.586	-0.039	28.865	35.029	20.663	-0.389	23.636	25.899	32.596	2.936	17.087	32.195	26.692	2.144	26.055	21.732	41.401	-22.764	16.002	30.983	48.416	-5.864	32.208	23.224	42.202	-3.981	15.083	25.016	28.948	-0.801	10.33	26.486	30.432	2.944	13.249	-5.2	-0.959	-13.088	28.073	40.433	28.819	-0.271
	-0.636	10.961	25.108	62.479	0.088	28.345	28.604	47.795	-0.039	28.865	35.029	20.663	-0.389	23.636	25.899	32.596	2.936	24.137	32.195	26.692	2.144	26.055	21.732	41.401	-5.153	16.002	30.983	48.416	-5.864	32.208	23.224	42.202	-3.981	15.083	25.016	28.948	-0.801	10.33	26.486	30.432	2.944	13.249	-5.2	-0.959	-5.088	28.073	40.433	28.819	-0.271
	-0.636	10.961	25.108	62.479	0.088	28.345	28.604	47.795	-1.776	28.865	35.029	20.663	-0.389	23.636	25.899	32.596	2.936	24.137	32.195	26.692	2.144	26.055	21.732	41.401	-5.153	16.002	38.675	48.416	-5.864	32.208	23.224	42.202	-3.981	15.083	25.016	28.948	-0.801	10.33	26.486	30.432	2.944	13.249	-5.2	-0.959	-5.088	28.073	40.433	28.819	-0.271
	-0.636	10.961	25.692	62.479	0.088	28.345	28.604	47.795	-1.776	28.865	35.029	20.663	-0.389	23.636	25.899	32.596	2.936	24.137	32.195	26.692	2.144	26.055	21.732	41.401	2.116	16.002	38.675	48.416	-5.864	32.208	23.224	42.202	-3.981	15.083	25.016	28.948	-0.801	10.33	26.486	30.432	2.944	13.249	-5.2	-0.959	-5.088	28.073	40.433	28.819	-0.271
	-0.636	10.961	25.692	62.479	0.088	28.345	28.604	47.795	-1.776	28.865	35.029	20.663	-0.389	23.636	19.563	32.596	2.936	24.137	32.195	26.692	2.144	16.562	21.732	41.401	2.116	16.002	38.675	47.096	-5.864	32.208	23.224	42.202	-3.981	15.083	25.016	28.7	-0.801	10.33	26.486	30.432	2.944	13.249	-5.2	-0.959	-5.088	28.073	40.433	28.819	-0.271
	-0.636	10.961	24.671	62.479	0.088	28.345	29.811	47.795	-1.776	28.865	35.029	20.663	-0.389	21.934	19.563	32.596	2.936	24.137	32.195	26.692	2.144	16.562	21.732	41.401	2.116	16.002	11.833	47.096	-5.864	32.208	23.224	42.202	-3.981	15.083	25.016	28.7	-0.801	10.33	26.486	30.432	2.944	13.249	-5.2	-0.959	-5.088	28.073	40.433	28.819	-0.271
	-0.636	10.961	24.671	62.479	0.088	28.345	29.811	47.795	-1.776	28.865	35.029	20.663	-0.389	21.934	19.563	32.596	2.936	24.137	32.195	26.692	2.144	22.606	21.732	41.401	2.116	16.002	11.833	47.096	-5.864	32.208	18.908	42.202	-3.981	15.083	25.016	28.7	-0.801	10.33	26.486	30.432	2.944	13.249	-5.2	-0.959	-5.088	28.073	40.433	28.819	-0.271
	-0.636	10.961	24.671	62.479	0.088	28.345	23.154	47.795	-8.684	28.865	35.029	20.663	-0.389	21.934	19.563	32.596	2.936	24.137	32.195	26.692	2.144	22.606	21.732	41.401	2.116	16.002	11.833	47.096	-5.864	32.208	18.908	42.202	-3.981	15.083	25.016	28.7	-0.801	10.33	26.486	30.432	2.944	13.249	-5.2	-0.959	-5.088	28.073	40.433	28.819	-0.271
	2.17	10.961	24.671	62.479	0.088	28.345	23.154	47.795	-8.684	28.865	35.029	20.663	-0.389	21.934	14.262	32.596	2.936	24.137	32.195	26.692	2.144	22.606	21.732	41.401	2.116	16.002	1.37	47.096	-5.864	32.208	18.908	39.304	-3.981	15.083	25.016	28.7	-0.801	10.33	26.486	30.432	2.944	13.249	-5.2	-0.959	-5.088	28.073	40.433	28.819	-0.271
	2.17	10.961	24.671	62.479	0.088	28.345	29.811	47.795	-8.684	28.865	35.029	20.663	-0.389	21.934	14.262	32.596	2.936	24.137	32.195	26.692	2.144	22.606	21.732	41.401	1.537	16.002	1.37	47.096	-5.864	32.208	18.908	39.304	-3.587	15.083	25.016	28.7	-0.801	10.33	26.486	30.432	2.944	13.249	-5.2	-0.959	-5.088	28.073	40.433	28.819	-0.271
	2.17	10.961	24.671	62.479	0.088	28.345	29.811	47.795	-8.684	28.865	35.029	20.663	-0.389	21.934	14.262	32.596	2.936	24.137	32.195	26.692	2.144	22.606	21.732	41.401	1.537	16.002	1.37	47.096	-5.864	32.208	18.908	39.304	-3.587	15.083	25.016	28.7	-0.801	10.33	26.486	30.432	2.944	13.249	-5.2	-0.959	-5.088	28.073	40.433	28.819	-0.271
	2.17	10.961	24.671	62.479	0.088	28.345	29.811	47.857	2.75	28.865	35.029	20.663	-0.389	21.934	14.262	32.596	2.936	24.137	32.195	26.692	2.144	22.606	21.732	41.401	1.537	16.002	1.37	47.096	-5.864	32.208	18.908	39.304	2.61	15.083	25.016	28.7	-0.801	10.33	26.486	30.432	2.944	13.249	-5.2	-0.959	-5.088	28.073	40.433	28.819	-0.271
	2.17	10.961	24.671	61.318	0.088	28.345	29.811	47.857	2.75	28.865	35.029	20.663	-0.389	21.934	14.262	32.596	2.936	24.137	32.195	26.692	2.144	22.606	21.732	41.401	1.537	16.002	1.37	47.096	-5.864	32.208	18.908	39.304	2.61	15.083	25.016	28.7	-0.801	10.33	26.486	30.432	2.944	13.249	-5.2	-0.959	-5.088	28.073	40.433	28.819	-0.271
	2.17	10.961	26.14	61.318	0.088	28.345	29.811	47.857	2.75	28.865	35.029	20.663	-0.389	21.934	14.262	32.596	2.936	24.137	32.195	26.692	2.144	22.606	21.732	41.401	1.537	16.002	1.37	47.096	-5.864	32.311	18.908	39.304	2.61	15.083	25.016	28.7	-0.801	10.33	26.486	30.432	2.944	13.249	-5.2	-0.959	-5.088	28.073	40.433	28.819	-0.271
	2.17	10.961	26.14	61.318	-0.265	28.345	29.811	47.857	2.75	28.865	35.029	20.663	-0.389	21.934	14.262	32.596	2.936	24.137	32.195	26.692	2.144	22.606	21.732	42.985	1.537	16.002	1.37	47.096	-5.864	32.311	18.908	43.002	2.61	15.083	25.016	28.7	-0.801	10.33	26.486	30.432	2.944	13.249	-5.2	-0.959	-5.088	28.073	40.433	28.819	-0.271
	2.17	10.961	26.14	61.318	-0.265	28.345	29.811	47.591	2.75	28.865	35.029	20.663	-0.389	21.934	14.262	36.18	2.936	24.137	32.195	26.692	2.144	22.606	21.732	42.985	1.537	16.002	1.37	47.096	-8.448	32.311	18.908	43.002	2.61	15.083	25.016	28.7	-0.801	10.33	26.486	30.432	2.944	13.249	-5.2	-0.959	-5.088	28.073	40.433	28.819	-0.271
	2.17	10.961	26.14	61.318	-0.265	28.345	29.804	47.591	2.75	28.865	35.029	20.663	-0.389	21.934	14.262	36.18	2.936	24.137	32.195	26.692	2.144	22.606	21.732	42.985	1.537	16.002	1.37	47.096	-8.448	32.311	18.908	43.002	2.61	15.083	25.016	28.7	0.09	10.33	26.486	30.432	2.944	13.249	-5.2	-0.959	-5.088	28.073	40.433	28.819	-0.271
	2.17	10.961	26.14	58.512	-0.265	28.345	29.804	47.591	2.75	28.865	35.029	20.663	-0.389	21.934	14.262	36.18	2.936	24.137	32.195	26.258	2.144	22.606	21.732	42.985	1.537	16.002	1.37	47.096	-8.448	38.569	21.042	43.002	2.61	15.083	25.016	28.7	0.09	10.33	26.486	30.432	2.944	13.34	-5.2	-0.959	-5.088	28.073	40.433	28.819	1.509
	2.17	10.961	26.14	58.512	-0.265	28.345	29.804	47.591	2.732	28.865	35.029	20.663	-0.389	18.811	14.262	36.18	2.936	16.506	32.195	26.258	2.144	22.606	21.732	42.985	1.537	16.002	1.37	47.096	-8.448	38.569	21.042	43.002	2.61	15.083	25.016	28.7	0.09	10.33	26.486	30.432	2.944	13.34	-5.2	-0.959	-5.088	28.073	40.433	28.819	1.509
	2.17	10.961	26.14	58.512	-0.265	28.345	29.804	47.591	2.732	28.865	35.029	20.663	-0.328	18.811	14.262	36.18	2.936	16.506	32.195	26.258	2.144	22.606	21.732	42.985	-3.369	16.002	1.37	47.096	1.188	25.599	21.042	43.002	2.61	15.083	25.016	28.7	0.09	10.33	26.486	30.432	2.944	13.34	-5.2	-0.959	-5.127	28.073	40.433	28.819	1.509
	2.17	10.961	26.14	58.512	-0.265	28.345	24.255	47.591	2.732	28.865	35.029	20.663	-0.328	18.811	14.262	36.18	2.936	16.506	32.195	26.258	2.144	22.606	21.732	42.985	-3.369	16.002	1.37	47.096	1.188	25.599	21.042	43.002	2.61	15.083	25.016	28.7	0.09	10.33	26.486	30.432	2.944	13.34	-5.2	-0.959	-5.127	28.073	40.433	28.819	-26.545
	2.17	10.961	26.14	58.512	-1.83	28.345	24.255	47.591	2.732	28.865	35.029	24.749	-0.328	20.192	14.262	36.18	2.936	16.506	32.195	26.258	2.144	22.606	21.732	42.985	-3.369	16.002	1.37	47.096	1.188	25.599	19.541	43.002	-1.416	15.083	25.016	28.7	0.09	10.33	26.486	30.432	2.944	13.34	-5.2	-0.959	-5.127	28.073	40.433	28.819	-26.545
	2.17	10.961	26.14	58.512	-1.83	28.345	24.255	48.07	2.732	28.865	35.029	24.749	-0.328	20.192	14.262	35.402	2.936	16.506	32.195	26.258	2.144	22.606	21.732	42.985	-3.369	16.002	1.37	47.096	1.188	25.599	19.541	43.002	-1.416	15.083	25.016	28.7	0.09	10.33	26.486	30.432	2.944	13.34	-5.2	-0.959	-5.127	28.073	40.433	28.819	0.951
	2.17	10.961	26.14	58.512	-1.83	28.345	24.255	48.07	2.732	28.865	35.029	24.749	-0.328	20.192	20.029	35.402	2.936	16.506	32.195	26.258	-2.845	22.606	21.732	42.985	-3.369	16.002	1.37	47.096	1.188	25.599	19.541	43.002	-1.416	15.083	25.016	28.7	0.09	10.33	26.486	30.432	2.944	13.34	-5.2	-0.959	7.452	28.073	40.433	28.819	0.951
	2.17	10.961	26.14	58.512	2.093	28.345	24.255	47.424	2.732	28.865	35.029	24.749	-0.328	20.192	20.029	35.402	2.936	10.905	32.195	26.258	-2.845	22.606	21.732	42.985	-3.369	16.002	1.37	47.096	1.188	25.599	20.4	43.002	-1.416	15.083	25.016	28.7	0.09	10.33	26.486	30.432	2.944	13.34	-5.2	-0.959	7.452	28.073	40.433	28.819	0.951
	2.17	10.961	26.14	58.512	0.188	28.345	24.255	47.424	2.732	28.865	35.029	24.749	-0.606	20.192	20.029	35.402	2.936	10.905	32.195	26.258	-2.845	22.606	21.732	42.985	-3.369	16.002	1.37	47.096	1.188	25.599	20.4	43.002	-1.416	15.083	25.016	28.7	0.09	10.33	26.486	30.432	2.944	13.34	-5.2	-0.959	7.452	28.073	40.433	28.819	0.951
	2.17	10.961	26.14	58.512	0.188	28.345	24.255	47.424	2.732	28.865	35.029	24.749	-0.606	20.192	20.029	35.402	2.936	10.905	32.195	26.258	-2.845	22.606	21.732	42.985	-3.369	16.002	1.37	47.096	8.314	25.599	20.4	43.002	-1.416	15.083	25.016	28.7	0.09	10.33	26.486	30.432	2.944	13.34	-5.2	-0.959	7.452	28.073	40.433	28.819	0.951
	2.17	10.961	26.14	58.512	0.188	28.345	24.255	47.821	2.732	28.865	35.029	24.749	-0.606	20.192	20.029	35.402	2.936	10.905	32.195	26.258	-2.845	22.606	21.732	42.985	3.222	16.002	1.37	47.096	8.314	25.599	20.4	43.002	-1.416	15.083	25.016	30.295	0.09	10.33	26.486	30.432	2.944	13.34	-5.2	-0.959	-8.097	28.073	40.433	28.819	0.951
	2.17	10.961	26.14	74.959	0.188	28.345	24.255	47.821	2.732	28.865	35.029	24.749	-0.606	20.192	20.029	35.402	2.936	10.905	32.195	26.258	-2.845	22.606	21.732	42.985	3.222	16.002	1.37	47.096	8.314	41.282	19.21	43.002	-1.416	15.083	25.016	30.295	0.09	10.33	26.486	30.432	2.944	13.34	-5.2	-0.959	-8.097	28.073	40.433	28.819	0.951
	2.17	10.961	26.14	74.959	0.188	28.345	24.255	47.821	2.732	28.865	35.029	24.749	-0.606	20.192	26.837	35.402	2.936	10.905	32.195	26.258	-2.845	22.606	21.732	42.985	3.222	16.002	1.37	47.096	8.098	29.668	19.21	43.002	-1.416	15.083	25.016	30.295	0.09	10.33	26.486	30.432	2.944	13.34	-5.2	-0.959	-8.097	28.073	40.433	28.819	1.838
	2.17	10.961	26.14	74.959	0.188	28.345	24.255	47.821	2.732	19.746	35.029	24.749	-0.606	20.192	26.837	35.402	2.936	10.905	32.195	26.258	-2.845	22.606	21.732	42.985	3.222	16.002	1.37	47.096	8.098	29.668	19.21	43.002	-1.416	15.083	25.016	30.295	0.09	10.33	26.486	30.432	2.944	13.34	-5.2	-0.959	-8.097	28.073	40.433	28.819	1.838
	2.17	10.961	26.14	74.959	0.188	28.345	24.255	47.821	2.732	19.746	35.029	24.749	-0.606	20.192	26.837	35.402	2.936	10.905	32.195	26.258	-2.845	22.606	21.732	42.985	3.222	16.002	1.37	47.096	8.098	29.668	19.21	43.002	-1.416	15.083	25.016	30.295	0.09	10.33	26.486	30.432	2.944	13.34	-5.2	-0.959	-8.097	28.073	40.433	28.819	1.838
	2.17	10.961	26.14	74.959	0.188	28.345	24.255	47.821	2.732	19.746	35.029	24.731	-0.178	13.357	26.837	35.402	2.936	10.905	32.195	26.258	-2.845	22.606	33.356	42.985	3.222	16.002	1.37	47.096	8.098	29.668	19.21	43.002	-1.416	15.083	25.016	30.295	0.09	10.33	26.486	30.432	2.944	13.34	-5.2	-0.959	-8.097	28.073	40.433	28.819	1.838
	2.17	10.961	26.14	59.256	0.188	28.345	24.255	47.821	2.732	19.746	35.029	24.731	-0.178	13.357	26.837	35.402	2.936	10.905	32.195	26.258	-2.845	22.606	33.356	42.985	3.222	16.002	1.37	47.096	8.098	24.618	19.21	35.131	-1.416	15.083	25.016	30.295	-7.181	10.33	26.486	30.432	2.944	13.34	-5.2	-0.959	-8.097	28.073	40.433	28.819	-7.042
	2.17	10.961	26.14	59.256	0.188	28.345	24.255	47.821	2.732	19.746	35.029	24.731	-0.178	13.357	26.837	35.402	2.936	10.905	32.195	26.258	-2.845	22.606	33.356	42.985	3.222	16.002	1.37	47.096	8.098	24.618	19.927	35.131	-1.416	15.083	25.016	30.295	-7.181	10.33	26.486	30.432	2.944	13.34	-5.2	-0.959	-8.097	28.073	40.433	28.819	-7.042
	2.17	10.961	26.14	59.256	0.188	28.345	24.255	47.821	5.549	26.17	35.029	24.731	-0.178	13.357	26.837	35.402	2.936	10.905	32.195	26.258	-2.845	22.606	31.194	42.985	3.222	25.569	30.076	47.096	8.098	24.618	19.927	35.131	-1.416	15.083	25.016	30.295	-7.181	10.33	26.486	30.432	2.944	13.34	-5.2	-0.959	-11.189	28.073	40.433	28.819	1.869
	2.17	10.961	26.14	59.256	0.188	28.345	24.255	47.821	5.549	26.17	35.029	24.731	-0.178	13.357	26.837	35.402	2.936	10.905	32.195	26.258	-2.845	22.606	9.619	42.985	3.222	25.569	30.076	47.096	8.098	24.618	25.766	35.131	-1.416	15.083	25.016	30.295	-7.181	13.456	26.486	30.432	2.944	13.34	-5.2	-0.959	-11.189	28.073	40.433	28.819	1.869
	2.17	10.961	26.14	59.256	0.188	28.345	23.949	47.821	5.549	26.17	35.029	24.731	-0.178	13.357	26.837	35.402	2.936	10.905	32.195	26.258	-2.845	22.606	9.619	44.454	-1.475	25.569	30.076	47.096	8.098	24.618	25.766	35.131	-1.416	15.083	25.016	30.305	-7.181	13.456	26.486	30.432	2.944	13.34	-5.2	-0.959	-6.821	28.073	40.433	28.819	1.869
	2.17	10.961	26.14	59.256	0.188	28.345	23.949	47.821	5.549	26.17	35.029	24.731	-0.178	13.357	26.837	35.402	2.936	10.905	32.195	26.258	-2.845	22.606	23.095	44.454	-1.475	13.702	30.076	47.096	1.563	24.618	31.09	35.131	-1.416	15.083	25.016	30.305	-7.181	13.456	26.486	30.432	2.944	13.34	-5.2	-0.959	-6.821	28.073	40.433	28.819	1.869
	2.17	10.961	26.14	59.256	0.188	28.345	23.949	47.821	-4.511	26.17	35.029	24.731	-0.178	13.357	26.837	35.402	2.936	16.218	32.195	26.258	-2.845	22.606	23.095	44.454	-1.475	13.702	30.076	47.096	1.563	37.55	31.09	35.131	-1.416	15.083	25.016	30.305	-8.036	13.456	26.486	30.432	2.944	13.34	-5.2	-0.959	-6.821	28.073	40.433	28.819	1.869
	2.17	10.961	26.14	59.256	0.188	28.345	23.949	47.821	-4.511	26.17	35.029	24.731	-0.178	13.357	26.837	35.402	2.936	16.218	32.195	26.258	-2.845	22.606	23.095	44.454	-1.475	13.702	22.701	47.096	1.563	37.55	37.318	35.131	-1.416	15.083	25.016	30.305	-8.036	13.456	26.486	30.432	2.944	13.34	-5.2	-0.959	-6.821	28.073	40.433	28.819	1.869
	2.17	10.961	26.14	59.256	0.188	28.345	23.949	47.821	-4.511	26.17	35.029	24.731	-0.178	13.357	26.837	35.402	2.936	16.218	32.195	26.258	-2.845	22.606	23.095	44.454	-1.475	13.702	22.701	47.096	1.563	37.55	37.318	35.131	-1.416	15.083	25.016	30.305	-8.036	13.456	26.486	30.432	2.944	13.34	-5.2	-0.959	-6.821	28.073	40.433	28.819	-0.885
	2.17	10.961	26.14	59.256	0.188	28.345	23.949	47.821	-4.511	26.17	35.029	24.731	-0.178	13.357	19.841	35.402	2.936	16.218	32.195	26.258	-2.845	22.606	23.095	44.454	-1.475	13.702	22.701	47.096	1.563	37.55	37.318	35.131	-1.416	15.083	25.016	30.305	-8.036	13.456	26.486	30.432	2.944	13.34	-5.2	-0.959	-6.821	28.073	40.433	28.819	-0.885
	2.17	10.961	26.14	59.256	7.173	28.345	23.949	47.821	-4.511	26.17	35.029	24.731	-0.178	13.357	19.841	36.335	2.936	16.218	32.195	26.258	-2.845	22.606	23.095	44.454	-1.475	13.702	22.701	47.096	0.017	37.55	37.318	35.131	-1.416	15.083	25.016	30.305	-8.036	13.456	26.486	30.432	2.944	13.34	-5.2	-0.959	9.032	28.073	40.433	28.819	-0.885
	2.17	10.961	26.14	59.256	7.173	28.345	23.949	47.821	-4.511	26.17	35.029	24.731	-0.178	13.357	22.261	36.335	2.936	16.218	32.195	26.258	-2.845	22.606	23.095	44.454	-1.475	13.702	22.701	47.096	0.017	37.55	37.318	35.131	-1.416	15.083	25.016	30.305	-8.036	13.456	26.486	30.432	2.944	13.34	-5.2	-0.959	9.032	28.073	40.433	28.819	-0.885
	2.17	10.961	26.14	73.509	7.173	28.345	23.949	47.821	-4.511	26.17	35.029	24.731	-0.178	13.357	22.261	32.268	2.936	16.218	32.195	26.258	-2.845	32.92	23.095	44.454	-1.475	13.702	22.701	47.096	0.017	37.55	37.318	35.131	-1.416	15.083	25.016	30.305	-8.036	13.456	26.486	30.432	2.944	13.34	-5.2	-0.959	9.032	28.073	40.433	28.819	-2.494
	2.17	10.961	26.14	73.509	7.173	28.345	23.949	47.821	-4.511	26.17	35.029	24.731	-0.178	25.446	22.261	32.268	2.936	16.218	32.195	26.258	-2.845	32.92	23.095	44.454	-1.475	13.702	22.701	47.096	0.017	37.55	37.318	35.131	-1.416	15.083	25.016	30.305	-8.036	13.456	26.486	30.432	2.944	13.34	-5.2	-0.959	9.032	28.073	40.433	28.819	-2.494
	2.17	10.961	26.14	73.509	7.173	28.345	23.949	47.821	-4.511	26.17	35.029	24.731	-0.178	25.446	22.261	32.268	2.936	16.218	32.195	26.258	-2.845	32.92	50.183	44.454	-1.475	13.702	11.322	47.096	0.562	37.55	37.318	35.131	-1.416	15.083	25.016	30.305	-3.887	13.456	26.486	30.432	2.944	13.34	-5.2	-0.959	9.032	28.073	40.433	28.819	-2.494
	2.17	10.961	26.14	73.509	7.173	28.345	23.949	47.821	-4.511	26.17	35.029	24.731	-0.178	10.575	22.261	32.268	2.936	16.218	32.195	26.258	-2.845	32.92	50.183	44.454	-1.475	13.702	11.322	47.096	0.562	37.55	37.318	35.131	-1.416	13.381	25.016	30.305	-3.887	13.456	26.486	30.432	2.944	13.34	-5.2	-0.959	9.032	28.073	40.433	28.819	-2.494
	2.17	10.961	26.14	73.509	7.173	28.345	23.949	47.821	6.218	26.17	35.029	24.735	-0.178	10.575	27.522	32.268	2.936	16.218	32.195	26.258	-2.845	22.489	50.183	44.454	-1.475	13.702	11.322	47.096	0.562	37.55	37.318	35.131	-1.416	13.381	25.016	37.375	-3.887	13.456	26.486	30.432	2.944	13.34	-5.2	-0.959	9.032	28.073	40.433	28.819	-4.986
	2.17	10.961	26.14	73.509	-1.866	28.345	29.815	47.821	6.218	26.17	35.029	24.735	-0.178	10.575	27.522	32.268	2.936	16.218	32.195	26.258	-2.845	22.489	50.183	44.454	-1.475	13.702	11.322	47.096	0.562	37.55	37.318	35.131	-1.416	13.381	25.016	37.375	10.203	13.456	26.486	30.432	2.944	13.34	-5.2	-0.959	8.125	28.073	40.433	28.819	3.643
	2.17	10.961	26.14	73.509	-1.866	28.345	29.815	47.821	6.218	26.17	35.029	22.853	-0.178	10.575	27.522	32.268	2.936	14.393	32.195	26.258	-2.845	22.489	23.434	44.454	8.637	13.702	11.322	47.096	0.562	37.55	37.318	35.131	-1.416	13.381	25.016	37.375	10.203	13.456	26.486	30.432	2.944	13.34	-5.2	-0.959	8.125	28.073	40.433	28.819	3.643
	2.17	10.961	26.14	73.509	-1.866	28.345	29.815	47.821	6.218	26.17	35.029	22.853	-0.178	10.575	27.522	32.268	2.936	14.393	32.195	26.258	-2.845	22.489	23.434	44.454	8.637	13.702	25.391	47.096	0.562	37.55	37.318	35.131	-1.416	13.381	25.016	37.375	10.203	13.456	26.486	30.432	2.944	13.34	-5.2	-0.959	8.125	28.073	35.355	28.819	5.428
	2.17	10.961	26.14	73.509	-1.866	28.345	26.555	47.821	6.218	26.17	35.029	22.853	-0.077	10.575	35.493	32.268	2.936	14.393	32.195	26.258	-2.845	22.489	23.434	44.454	2.612	13.702	25.391	47.096	-0.562	37.55	37.318	35.131	-1.416	13.381	25.016	37.375	10.203	13.456	26.486	30.432	2.944	13.34	-5.2	-0.959	8.125	28.073	35.355	28.819	5.428
	2.17	10.961	26.14	55.964	-1.866	28.345	26.555	47.821	6.218	26.17	35.029	22.853	-0.077	10.575	35.493	32.268	2.936	14.393	32.195	26.258	-2.845	22.489	23.434	44.454	2.612	13.702	47.245	47.096	-0.562	37.55	37.318	35.131	1.408	14.268	25.016	37.375	10.203	13.456	26.486	30.432	2.944	13.34	-5.2	-0.959	8.125	28.073	35.355	28.819	5.428
	2.17	10.961	26.14	55.964	-1.866	28.345	26.555	47.821	6.218	26.17	35.029	22.853	-0.077	10.575	35.493	32.268	2.936	14.393	32.195	26.258	-2.845	22.489	23.434	44.454	2.612	13.702	47.245	47.096	-0.562	37.55	37.318	35.131	1.408	14.268	25.016	37.375	10.203	13.456	26.486	35.804	2.944	13.34	-5.2	-0.959	8.125	28.073	35.355	28.819	5.428
	2.17	10.961	34.915	55.964	-1.866	28.345	26.555	47.821	6.218	26.17	35.029	22.853	-0.077	10.575	24.766	32.268	2.936	14.393	32.195	26.258	-2.845	22.489	23.434	44.454	2.612	13.702	47.245	47.096	-0.562	37.55	37.318	35.131	1.408	14.268	25.016	37.375	10.203	13.456	26.486	35.804	2.944	13.34	-5.2	-0.959	-7.049	28.073	35.355	28.819	4.047
	2.17	10.961	34.915	55.964	-1.866	28.345	26.555	47.821	6.218	26.17	35.029	22.853	-0.077	10.575	24.766	32.268	2.936	14.393	32.195	26.258	-2.845	22.489	23.434	44.454	2.612	13.702	47.245	47.096	-0.562	37.55	37.318	35.131	1.408	14.268	25.016	37.375	10.203	13.456	26.486	35.804	2.944	13.34	-5.2	-0.959	-7.049	28.073	35.355	28.819	4.047
	2.17	10.961	26.565	55.964	-1.866	28.345	26.555	47.821	6.218	26.17	35.029	22.853	-0.077	10.575	32.853	32.268	2.936	14.393	32.195	26.258	-2.845	22.489	23.434	44.454	2.612	13.702	40.343	47.096	-0.562	37.55	37.318	35.131	1.408	14.268	25.016	37.375	6.947	13.456	26.486	35.804	2.944	13.34	-5.2	-0.959	-7.049	28.073	35.355	28.819	4.047
	2.17	10.961	26.565	55.964	-1.866	28.345	26.555	47.821	6.218	31.833	35.029	22.853	-0.077	10.575	32.853	32.268	2.936	14.393	32.195	26.258	-2.845	22.489	23.434	44.454	2.612	13.702	40.343	47.096	-1.879	37.55	37.318	35.131	1.408	14.268	25.016	37.375	6.947	13.456	26.486	35.804	2.944	13.34	-5.2	-0.959	2.25	28.073	35.355	28.819	-8.622
	2.17	10.961	26.565	55.964	-0.349	28.345	26.555	47.821	6.218	31.833	35.029	22.853	-0.077	10.575	32.853	32.268	2.936	14.393	32.195	26.258	-2.845	22.489	23.434	44.454	2.612	13.702	40.343	47.096	-1.879	37.55	37.318	35.131	1.408	14.268	25.016	37.375	6.947	13.456	26.486	35.804	2.944	13.34	-5.2	-0.959	2.25	28.073	35.355	28.819	-8.622
	2.17	10.961	26.565	55.964	-0.349	28.345	26.555	47.821	6.218	31.833	35.029	22.853	-0.077	10.575	32.853	32.268	2.936	14.393	32.195	26.258	-2.845	22.489	23.434	44.454	2.612	13.702	40.343	47.096	-1.879	37.55	37.318	35.131	1.408	14.268	25.016	37.375	6.947	13.456	26.486	35.804	2.944	13.34	-5.2	-0.959	2.25	28.073	35.355	28.819	-8.622
	2.17	10.961	26.565	55.964	-0.349	28.345	26.555	45.426	6.218	23.408	35.029	22.853	-0.077	10.575	32.853	32.268	2.936	14.393	32.195	52.024	-2.845	22.489	23.434	44.454	0.391	13.702	40.343	47.096	-5.634	33.354	37.318	35.131	-3.339	14.268	25.016	37.375	6.947	13.456	26.486	35.804	2.944	13.34	-5.2	-0.959	2.25	28.073	35.355	28.819	-8.622
	2.17	10.961	26.565	39.675	-0.349	28.345	29.802	45.426	6.218	23.408	35.029	22.853	-0.077	10.575	32.853	32.268	2.936	14.393	32.195	52.024	-2.845	22.489	23.434	44.454	0.391	13.702	40.343	47.096	-5.634	33.354	37.318	35.131	-3.339	14.268	25.016	37.375	6.947	13.456	26.486	35.804	2.944	34.591	-5.2	-0.959	2.25	28.073	35.355	28.819	1.788
	2.17	10.961	26.565	39.675	-0.349	28.345	29.802	45.426	6.218	23.408	35.029	24.746	-0.077	10.575	32.853	32.268	2.936	14.393	32.195	52.024	-2.845	22.489	23.434	44.454	0.391	13.702	40.833	47.096	5.23	33.354	37.318	35.131	-3.339	14.268	25.016	37.375	3.992	13.456	26.486	35.804	2.944	34.591	-5.2	-0.959	2.25	28.073	35.355	28.819	1.788
	2.17	23.48	26.565	39.675	-0.349	28.345	29.802	32.23	6.218	23.408	35.029	24.746	-0.077	10.575	32.853	32.268	2.936	14.393	32.195	52.024	-2.845	22.489	23.434	44.454	0.391	13.702	40.833	47.096	5.23	33.354	37.318	35.131	-3.339	14.268	25.016	37.375	3.992	13.456	26.486	35.804	2.944	34.591	-5.2	-0.959	2.119	28.073	35.355	28.819	1.788
	2.17	23.48	26.565	39.675	-7.454	28.345	29.817	32.23	6.218	23.408	35.029	24.725	-0.077	10.575	32.853	32.268	2.936	14.393	32.195	52.024	-3.782	22.489	33.399	44.454	0.391	13.702	40.833	47.096	5.23	33.354	37.318	35.131	-3.339	14.268	25.016	37.375	3.992	13.456	26.486	35.804	2.944	26.111	-5.2	-0.959	2.119	28.073	35.355	28.819	1.788
	2.17	23.48	26.565	36.781	-7.454	28.345	29.817	32.23	6.218	23.408	35.029	24.725	-0.077	10.575	32.853	32.268	2.936	14.393	32.195	52.024	-3.782	29.173	33.399	44.454	0.391	13.702	40.833	47.096	7.158	33.354	37.318	35.131	-2.162	14.268	25.016	37.375	3.992	13.456	26.486	35.804	2.944	26.111	-5.2	-0.959	-23.522	28.073	35.355	28.819	1.788
	2.17	23.48	26.565	36.781	-7.454	28.345	29.807	34.208	6.218	23.408	35.029	24.725	-0.077	10.575	32.853	32.268	2.936	14.393	32.195	52.024	-3.782	29.173	33.399	44.454	0.391	13.702	40.833	47.096	7.158	33.354	37.318	35.131	-2.162	14.268	25.016	37.375	9.217	13.456	26.486	35.804	2.944	26.111	-5.2	-0.959	-23.522	28.073	35.355	28.819	1.788
	2.17	23.48	26.565	36.781	-3.836	28.345	29.807	34.208	6.218	23.408	35.029	24.725	-0.077	10.575	32.853	32.268	2.936	14.393	32.195	52.024	-3.782	18.002	33.399	44.454	-8.683	13.702	38.359	47.096	-1.423	33.354	37.318	35.131	-2.162	14.268	25.016	37.375	9.217	13.456	26.486	35.804	2.944	26.111	-5.2	-0.959	-5.712	28.073	35.355	28.819	1.788
	2.17	23.48	26.565	47.898	-3.836	28.345	29.807	34.208	6.218	23.408	35.029	24.725	-0.077	10.575	32.853	32.268	2.936	14.393	32.195	52.024	-3.782	18.002	33.399	44.454	-8.683	13.702	38.359	47.096	-1.423	33.354	37.318	35.131	-2.162	14.268	25.016	37.375	9.217	13.456	26.486	35.804	2.944	26.111	-5.2	-0.959	-5.712	28.073	35.355	28.819	1.788
	2.17	23.48	26.565	47.898	6.307	28.345	29.807	34.208	6.218	23.408	35.029	24.725	-0.077	10.575	32.853	32.268	2.936	14.393	32.195	65.347	-3.782	18.002	33.399	44.454	-8.683	13.702	38.359	50.711	-1.423	33.354	37.318	35.131	-2.162	14.268	25.016	37.375	9.217	13.456	28.196	35.804	2.944	26.111	-5.2	-0.959	-5.712	28.073	35.355	28.819	1.788
	2.17	23.48	26.565	47.898	6.307	28.345	26.046	34.208	-1.333	23.408	35.029	24.725	-0.077	10.575	32.853	32.268	2.936	14.393	32.195	65.347	-3.782	18.002	33.399	44.454	-8.683	13.702	25.726	50.711	-1.423	33.354	37.318	35.131	4.566	14.268	28.074	37.375	9.217	13.456	28.196	35.804	2.944	26.111	-5.2	-0.959	-5.712	28.073	35.355	28.819	1.788
	2.17	23.48	26.565	47.898	-6.341	28.345	26.046	34.208	-1.333	23.408	35.029	24.743	-0.077	10.575	32.853	32.268	2.936	14.393	32.195	65.347	-3.782	18.002	34.421	44.454	-8.683	13.702	25.726	50.711	-1.423	33.354	37.318	35.131	4.566	14.268	28.074	37.375	9.217	13.456	28.196	35.804	2.944	26.111	-5.2	-0.959	-0.328	28.073	35.355	28.819	1.788
	2.17	25.83	26.565	46.948	-6.341	28.345	26.046	34.208	-1.333	23.408	35.029	24.743	0.915	10.575	32.853	32.268	2.936	14.393	32.195	65.347	-3.782	18.002	34.421	44.454	3.807	13.702	25.726	50.711	-1.423	33.354	37.318	35.131	4.566	14.268	28.074	37.375	2.668	11.622	28.196	35.804	2.944	26.111	-5.2	-0.959	-0.328	28.073	35.355	28.819	1.788
	2.17	25.83	26.565	46.948	-6.341	28.345	26.046	34.208	-1.333	23.408	35.029	24.743	0.915	10.575	32.853	32.268	2.936	14.393	32.195	65.347	-3.782	18.002	34.421	44.454	3.807	13.702	26.261	50.711	-1.572	33.354	37.318	35.131	4.566	14.268	28.074	37.375	2.668	11.622	28.196	35.804	2.944	14.1	-5.2	-0.959	-0.328	28.073	35.355	28.819	1.788
	2.17	5.657	26.565	46.948	-6.341	28.345	29.8	34.208	-1.333	23.408	35.029	24.743	0.915	10.575	32.853	32.268	2.936	14.393	32.195	65.347	-3.782	18.002	34.421	44.454	3.807	19.163	26.261	50.711	-1.572	33.354	37.318	35.131	-13.651	14.268	28.074	37.375	2.668	11.622	28.196	35.804	2.944	14.1	-5.2	-0.959	-0.328	28.073	35.355	28.819	1.788
	2.17	5.657	26.565	46.948	-5.604	28.345	29.8	35.249	-1.333	23.408	35.029	24.743	0.915	10.575	32.853	32.268	2.936	14.393	32.195	65.347	-3.782	18.002	34.421	44.454	3.807	19.163	26.261	50.711	-1.572	33.354	37.318	35.131	-13.651	14.268	28.074	37.375	10.903	11.622	28.196	35.804	2.944	14.1	-5.2	-0.959	-0.328	28.073	35.355	28.819	1.788
	2.17	14.734	26.565	34.882	-5.604	28.345	37.515	35.249	-1.333	23.408	35.029	24.743	0.915	10.575	32.853	32.268	2.936	14.393	32.195	65.347	-3.782	18.002	34.421	44.454	3.807	22.402	26.855	50.711	5.439	33.354	37.318	35.131	2.408	14.268	28.074	37.375	10.903	11.622	28.196	32.759	2.944	14.1	-5.2	-0.959	-0.328	28.073	35.355	28.819	1.788
	2.17	14.734	26.565	34.882	-5.604	28.345	37.515	35.249	-1.333	23.408	35.029	24.743	0.915	10.575	35.193	32.268	2.936	14.393	32.195	65.347	-3.782	18.002	35.177	44.454	-9.282	22.402	26.855	50.711	5.439	33.354	37.318	35.131	2.408	14.268	28.074	37.375	10.903	11.622	28.196	32.759	2.944	14.1	-5.2	-0.959	-0.328	28.073	35.355	28.819	1.788
	2.17	14.734	26.565	34.882	-5.604	28.345	37.515	35.249	-1.333	23.408	35.029	24.743	0.915	10.575	35.193	32.268	2.936	14.393	32.195	65.347	-3.782	18.002	35.177	44.454	-9.282	22.402	20.68	50.711	5.439	33.354	37.318	35.131	2.408	14.268	28.074	37.375	-5.371	7.915	28.196	32.759	2.944	14.1	-5.2	-0.959	-0.328	28.073	35.355	28.819	1.788
	2.17	14.734	26.565	34.882	3.907	28.345	37.515	35.249	-1.333	25.826	35.029	24.743	0.915	10.575	35.193	32.268	2.936	14.393	32.195	65.347	-3.782	18.002	35.177	44.454	-9.282	22.402	20.68	50.711	-6.465	33.354	37.318	35.131	2.408	14.268	28.074	37.375	-5.371	7.915	28.196	32.759	2.944	14.1	-5.2	-0.959	-0.328	28.073	35.355	28.819	1.788
	2.17	14.734	26.565	34.882	1.647	28.345	37.515	38.419	-1.333	25.826	35.029	24.743	0.915	10.575	35.193	32.268	2.936	14.393	32.195	55.386	-3.782	18.002	35.177	44.454	-9.282	22.402	20.68	50.711	-6.465	33.354	37.318	35.131	2.408	14.268	28.074	30.027	-5.371	7.915	28.196	36.136	2.944	21.58	-5.2	-0.959	-0.328	28.073	35.355	28.819	1.788
	2.17	14.734	26.565	34.882	1.647	28.345	37.515	38.419	-1.333	25.826	35.029	24.446	0.915	10.575	35.193	32.268	2.936	14.393	32.195	55.386	-3.782	18.002	26.103	44.454	-9.282	22.402	26.762	50.711	-6.465	33.354	37.318	35.131	2.408	14.268	28.074	30.027	-5.371	7.915	28.196	36.136	2.944	21.58	-5.2	-0.959	-0.328	28.073	35.355	28.819	1.788
	2.17	14.734	26.565	34.882	1.647	28.345	37.515	38.419	-1.333	25.826	35.029	24.446	0.915	10.575	35.193	32.268	2.936	14.393	32.195	55.386	-3.782	21.948	26.103	44.454	-9.282	21.382	26.762	50.711	-6.465	33.354	37.318	35.131	2.408	14.268	28.074	30.027	-5.371	7.915	28.196	36.136	2.944	21.58	-5.2	-0.959	-0.328	28.073	35.355	28.819	1.788
	2.17	14.734	26.565	34.882	1.647	28.345	37.515	48.198	-1.333	25.826	35.029	24.446	0.915	10.575	29.896	32.268	2.936	14.393	32.195	55.386	-3.782	21.948	26.103	44.454	-9.282	21.382	26.762	50.711	-6.465	33.354	37.318	35.131	2.408	14.268	28.074	30.027	-5.371	7.915	28.196	36.136	2.944	21.58	-5.2	-0.959	-0.328	28.073	35.355	28.819	1.788
	2.17	14.734	26.565	30.932	1.647	28.345	37.515	48.198	-1.333	25.826	35.029	24.446	0.915	10.575	29.896	32.268	2.936	14.393	32.195	55.386	-3.782	21.948	26.103	44.454	-9.282	21.382	26.762	50.711	-6.465	33.354	37.318	35.131	2.408	13.331	28.074	34.798	-5.371	7.915	28.196	36.136	2.944	21.58	-5.2	-0.959	-0.328	28.073	35.355	28.819	1.788
	2.17	6.714	26.565	30.932	1.647	28.345	37.515	48.198	-1.333	25.826	35.029	24.446	0.915	10.575	22.065	32.268	2.936	14.393	32.195	47.585	-3.782	21.948	26.103	44.454	-9.282	21.382	26.762	50.711	-6.465	33.354	37.318	35.131	2.408	13.331	28.074	34.798	-5.371	7.915	28.196	36.136	2.944	21.58	-5.2	-0.959	-0.328	28.073	35.355	28.819	1.788
	2.17	6.714	26.565	30.932	1.647	28.345	37.515	48.198	-1.333	25.826	35.029	24.446	0.915	10.575	22.065	32.268	2.936	14.393	32.195	47.585	-3.782	21.948	26.103	44.454	-0.316	26	26.762	50.711	-6.465	33.354	37.318	48.687	2.408	13.331	28.074	34.798	-5.371	7.915	28.196	36.136	2.944	21.58	-5.2	-0.959	3.077	28.073	35.355	28.819	1.788
	2.17	6.714	26.565	30.932	1.647	28.345	37.515	48.198	-1.333	25.826	35.029	24.446	0.915	10.575	32.965	32.268	2.936	14.393	32.195	47.585	-3.782	21.948	26.103	44.454	-0.316	26	26.762	50.711	5.033	33.354	37.318	48.687	2.408	13.331	27.387	34.798	-5.371	7.915	28.196	36.136	2.944	21.58	-5.2	-0.959	3.077	28.073	35.355	28.819	1.788
	2.17	6.714	26.565	62.195	1.647	28.345	37.515	48.198	-1.333	25.826	35.029	24.446	0.915	10.575	32.965	32.268	2.936	14.393	32.195	47.585	-3.782	21.948	26.103	44.454	-0.316	26	26.762	50.711	5.033	33.354	37.318	48.687	2.408	13.331	27.387	34.798	-5.371	7.915	28.196	36.136	2.944	21.58	-5.2	-0.959	3.077	28.073	35.355	28.819	1.788
	2.17	6.714	26.565	62.195	1.647	28.345	37.515	38.336	-1.333	25.826	35.029	24.446	0.915	10.575	32.965	32.268	2.936	14.393	32.195	47.585	-3.782	21.948	26.103	44.454	-0.316	26	26.762	50.711	5.033	33.354	37.318	51.998	2.408	16.048	27.387	34.798	1.653	7.915	28.196	36.136	2.944	21.58	-5.2	-0.959	3.077	18.622	35.355	28.819	1.788
	2.17	6.714	26.565	62.195	-5.696	28.345	37.515	38.336	-1.333	25.826	35.029	24.446	0.915	10.575	32.965	32.268	2.936	14.393	32.195	47.585	-3.782	21.948	26.103	33.984	10.007	26	26.762	50.711	5.033	33.354	37.318	51.998	2.408	23.127	27.387	34.798	1.653	7.915	28.196	36.136	2.944	21.58	-5.2	-0.959	3.077	18.622	35.355	28.819	1.788
	2.17	6.714	26.565	62.195	-5.696	28.345	37.515	38.336	-1.333	25.826	35.029	24.446	0.915	10.575	32.965	32.268	2.936	14.393	32.195	47.585	-3.782	21.948	26.103	33.984	10.007	26	26.762	50.711	5.033	33.354	37.318	51.998	2.408	23.127	27.387	34.798	1.653	7.915	28.196	36.056	2.944	21.58	-5.2	-0.959	3.077	18.622	35.355	28.819	1.788
	2.17	6.714	26.565	62.195	-5.696	28.345	37.515	38.336	-1.333	25.826	35.029	24.446	0.915	10.575	32.965	32.268	2.936	14.393	32.195	47.585	-3.782	21.948	26.103	33.984	10.007	26	26.762	50.711	5.182	33.354	37.318	51.998	2.408	23.127	27.387	34.798	1.653	7.915	28.196	36.056	2.944	21.58	-5.2	-0.959	3.077	18.622	35.355	28.819	1.788
	2.17	6.714	26.565	65.733	14.7	28.345	37.515	38.336	-1.333	25.826	35.029	24.446	0.915	10.575	32.965	32.268	2.936	14.393	32.195	47.585	-3.782	21.948	26.103	33.984	-2.413	26	26.762	50.711	5.182	33.354	37.318	51.998	2.408	23.127	27.387	34.798	1.653	7.915	28.196	36.056	2.944	21.58	-5.2	-0.959	3.077	18.622	35.355	28.819	1.788
	2.17	6.714	26.565	65.733	14.7	28.345	37.515	38.336	-1.333	25.826	35.029	24.446	0.915	10.575	32.965	32.268	2.936	14.393	32.195	47.585	-3.782	21.948	26.103	33.984	-2.413	26	26.762	50.711	-2.396	33.354	37.318	51.998	2.408	23.127	16.266	34.798	1.653	7.915	28.196	36.056	2.944	21.58	-5.2	-0.959	3.077	18.622	35.355	28.819	1.788
	2.17	-0.307	26.565	65.733	8.142	28.345	37.515	38.336	-1.333	25.826	35.029	24.446	0.915	10.575	32.965	32.268	2.936	14.393	32.195	47.585	-3.782	21.948	26.103	33.984	-2.413	26	26.762	50.711	-2.396	2.248	37.318	51.998	1.112	23.127	16.266	34.798	1.653	7.84	28.196	36.056	2.944	21.58	-5.2	-0.959	3.173	18.622	35.355	28.819	1.788
	2.17	-0.307	26.565	58.401	8.142	28.345	37.515	38.336	-1.333	25.826	35.029	24.446	0.915	10.575	32.965	32.268	2.936	14.393	32.195	47.585	-3.782	21.948	26.103	33.984	3.407	26	26.762	50.711	-2.396	2.248	37.318	51.998	1.112	23.127	16.266	28.793	1.653	7.84	28.196	36.056	2.944	21.58	-5.2	-0.959	3.173	18.622	35.355	28.819	1.788
	2.17	-0.307	26.565	58.401	8.142	28.345	37.515	38.336	-1.333	25.826	35.029	24.446	0.915	10.575	32.965	32.268	2.936	14.393	32.195	47.585	-3.782	21.948	26.103	33.984	3.407	26	26.762	50.711	-2.396	2.248	37.318	51.998	1.112	23.127	16.266	28.793	1.653	7.84	28.196	36.056	2.944	21.58	-5.2	-0.959	3.173	18.622	35.355	28.819	1.788
	2.17	-0.307	26.565	58.401	-3.018	28.345	34.344	38.336	-1.333	25.826	35.029	24.446	0.915	10.575	32.965	32.268	2.936	14.393	32.195	47.585	-3.782	21.948	26.103	33.984	3.407	26	26.762	50.711	-2.396	2.248	37.318	51.998	1.112	23.127	16.266	28.793	1.653	7.84	28.196	36.056	2.944	21.58	-5.2	-0.959	3.173	18.622	35.355	28.819	1.788
	2.17	14.808	26.565	58.401	-3.018	28.345	34.344	51.354	-1.333	25.826	35.029	24.446	0.915	10.575	32.965	32.268	2.936	14.393	32.195	47.585	-3.782	21.948	26.103	33.984	3.407	13.39	26.762	50.711	-4.931	2.248	37.318	51.998	1.112	23.127	16.266	34.406	1.653	7.84	28.196	36.056	2.944	21.58	-5.2	-0.959	3.173	18.622	35.355	28.819	1.788
	2.17	14.808	26.565	58.401	-3.018	28.345	34.344	51.354	-1.333	25.826	35.029	24.446	0.915	10.575	32.965	32.268	2.936	14.393	32.195	47.585	7.039	21.948	26.103	33.984	3.407	13.39	26.762	50.711	-4.931	2.248	37.318	51.998	1.112	23.127	16.266	34.406	1.653	7.84	28.196	36.056	2.944	21.58	-5.2	-0.959	3.173	18.622	35.355	28.819	1.788
	2.17	14.808	26.565	58.401	-3.018	28.345	34.344	51.354	-1.333	25.826	35.029	24.446	0.915	10.575	32.965	32.268	2.936	14.393	32.195	47.585	7.039	21.948	26.294	33.984	3.407	13.39	26.762	50.711	-4.931	2.248	37.318	51.998	1.112	23.127	16.266	56.066	1.653	7.84	28.196	36.056	2.944	21.58	-5.2	-0.959	3.173	18.622	35.355	28.819	1.788
	2.17	14.808	26.565	58.401	-3.018	28.345	34.344	51.354	-1.333	25.826	35.029	24.446	0.915	10.575	32.965	32.268	2.936	14.393	32.195	47.585	0.449	21.948	26.294	33.984	3.407	13.39	26.762	50.711	-4.931	2.248	37.318	51.998	1.112	23.127	16.266	56.066	1.653	7.84	28.196	36.056	2.944	12.874	-5.2	-0.959	3.173	18.622	35.355	28.819	1.788
	2.17	14.808	26.565	58.401	-3.018	28.345	34.344	51.354	-1.333	25.826	35.029	24.446	0.915	10.575	32.965	32.268	2.936	14.393	32.195	47.585	0.449	21.948	26.294	33.984	3.407	13.39	26.762	50.711	-4.931	2.248	37.318	51.998	1.112	28.433	16.266	56.066	1.653	7.84	28.196	36.056	2.944	12.874	-5.2	-0.959	3.173	18.622	35.355	28.819	1.788
	2.17	14.808	26.565	58.401	-3.018	28.345	34.344	40.499	-1.333	25.826	35.029	24.446	0.915	10.575	32.965	32.268	2.936	14.393	32.195	47.585	0.449	21.948	26.294	33.984	3.407	13.39	26.762	50.711	-4.931	2.248	37.318	51.998	1.112	28.433	17.283	39.534	1.653	7.84	28.196	36.056	2.944	12.874	-5.2	-0.959	3.173	18.622	35.355	28.819	1.788
	2.17	14.808	26.565	58.401	-1.764	28.345	34.344	40.499	-1.333	25.826	35.029	24.446	0.915	10.575	32.965	32.268	2.936	18.062	32.195	47.585	0.449	30.328	26.294	33.984	3.407	13.39	26.762	50.711	-4.931	2.248	37.318	51.998	1.112	28.433	17.283	39.534	9.556	7.84	28.196	36.056	2.944	12.874	-5.2	-0.959	3.173	18.622	35.355	28.819	1.788
	2.17	14.808	26.565	58.401	-1.764	28.345	34.344	40.499	-1.333	25.826	35.029	24.446	0.915	10.575	32.965	32.268	2.936	18.062	32.195	47.585	0.449	30.328	26.294	33.984	3.407	13.39	26.762	50.711	-4.931	10.716	37.318	51.998	1.112	28.433	16.551	39.534	9.556	7.84	28.196	36.056	2.944	23.651	-5.2	-0.959	3.173	18.622	35.355	28.819	1.788
	2.17	14.808	26.565	58.401	-1.764	28.345	34.344	40.246	-1.333	25.826	35.029	24.446	0.915	10.575	32.965	32.268	2.936	14.299	32.195	47.585	0.449	30.328	26.294	33.984	3.407	13.39	26.762	50.711	-4.931	10.716	37.318	51.998	1.112	28.433	16.551	39.534	9.556	15.56	28.196	36.056	2.944	23.651	-5.2	-0.959	3.173	18.622	35.355	28.819	1.788
	2.17	14.808	26.565	58.401	-1.764	28.345	34.344	25.883	-1.333	25.826	35.029	24.446	0.915	10.575	32.965	32.268	2.936	14.299	32.195	47.585	0.449	30.328	26.294	33.984	3.407	13.39	26.762	50.711	-4.931	10.716	37.318	51.998	1.112	28.433	16.551	39.534	9.556	15.56	28.196	36.056	2.944	23.651	-5.2	-0.959	3.173	18.622	35.355	28.819	1.788
	2.17	14.808	26.565	58.401	-2.799	28.345	34.344	25.883	-1.333	25.826	35.029	24.446	0.915	10.575	32.965	32.268	2.936	14.299	32.195	47.585	0.449	30.328	26.294	33.984	-0.591	13.39	26.762	58.471	-4.931	10.716	37.318	51.998	1.112	28.433	16.551	39.534	4.787	15.56	28.196	36.056	2.944	23.651	0.474	-0.959	3.173	18.622	35.355	28.819	1.788
	2.17	14.808	26.565	58.401	-2.799	28.345	34.344	25.883	-1.333	25.826	35.029	24.446	0.915	10.575	32.965	32.268	2.936	14.299	32.195	47.585	0.449	30.328	26.294	33.984	-0.591	13.39	26.762	58.471	-4.931	10.716	37.318	38.995	1.112	28.433	16.551	39.534	4.787	15.56	28.196	36.056	2.944	23.651	0.474	-0.959	3.173	18.622	35.355	28.819	1.788
	2.17	14.808	26.565	58.401	-2.799	28.345	34.344	25.883	-1.333	25.826	35.029	24.446	0.915	10.575	32.965	32.268	2.936	14.299	32.195	47.585	0.449	30.328	28.086	33.984	7.005	21.255	26.762	58.471	-4.931	10.716	44.263	38.995	1.112	15.248	17.431	39.534	4.787	15.56	28.196	36.056	2.944	23.651	0.474	-0.959	3.173	18.622	35.355	28.819	1.788
	2.17	14.808	26.565	58.401	-2.799	28.345	34.344	25.883	-1.333	25.826	35.029	24.446	0.915	10.575	32.965	32.268	2.936	14.299	32.195	47.585	0.449	13.747	28.086	33.984	7.005	21.255	26.762	58.471	-4.931	10.716	35.573	38.995	1.112	15.248	17.431	39.534	4.787	15.56	28.196	36.056	2.944	23.651	0.474	-0.959	3.173	18.622	35.355	28.819	1.788
	2.17	14.808	26.565	58.401	-2.799	28.345	34.344	25.883	-1.333	25.826	35.029	24.446	0.915	10.575	32.965	32.268	2.936	14.299	32.195	47.585	0.449	13.747	32.083	33.984	7.005	21.255	26.762	58.471	-4.931	7.188	35.573	38.995	1.112	15.248	17.431	39.534	4.787	15.56	28.196	36.056	2.944	23.651	0.474	-0.959	3.173	18.622	35.355	28.819	1.788
	2.17	22.811	26.565	58.401	-2.799	28.345	34.344	25.883	-1.333	25.826	35.029	24.446	0.915	10.575	32.965	32.268	2.936	14.299	32.195	47.585	0.449	13.747	32.083	33.984	4.546	21.255	26.762	58.471	-4.931	7.188	38.087	38.995	1.112	15.248	17.431	39.534	4.787	15.56	28.196	36.056	2.944	23.651	0.474	-0.959	3.173	18.622	35.355	28.819	1.788
	2.17	22.811	26.565	58.401	-2.799	28.345	34.344	34.814	-1.333	25.826	35.029	24.446	0.915	10.575	32.965	32.268	2.936	14.299	32.195	47.585	0.449	13.747	32.083	33.984	4.546	21.255	26.762	58.471	-4.931	7.188	38.087	38.995	1.112	15.248	17.431	39.534	-23.82	15.56	28.196	36.056	2.944	23.651	0.474	-0.959	3.173	18.622	35.355	28.819	1.788
	2.17	22.811	26.565	58.401	-2.799	28.345	34.344	34.814	-22.198	25.826	35.029	24.446	0.915	10.575	32.965	32.268	2.936	14.299	32.195	47.585	0.449	13.747	32.083	33.984	4.546	21.255	26.762	58.471	-4.931	7.188	38.087	38.995	1.112	15.248	13.17	39.534	-23.82	15.56	28.196	36.056	2.944	23.651	0.474	-0.959	3.173	18.622	35.355	28.819	1.788
	2.17	22.811	26.565	58.401	-2.799	28.345	34.344	34.814	-22.198	25.826	35.029	24.446	0.915	10.575	32.965	32.268	2.936	22.537	32.195	39.772	0.449	13.747	32.083	33.984	4.546	21.255	26.762	58.471	-4.931	7.188	32.507	38.995	1.112	15.248	13.17	39.534	2.577	15.56	28.196	36.056	2.944	23.651	0.474	-0.959	-3.582	18.622	35.355	28.819	2.983
	2.17	22.811	26.565	65.072	-2.799	28.345	34.344	34.814	-22.198	25.826	35.029	24.446	0.915	10.575	32.965	32.268	2.936	22.537	32.195	39.772	0.449	25.058	32.083	33.984	4.546	21.255	26.762	58.471	-4.931	7.188	32.507	38.995	1.112	15.248	13.17	39.534	2.577	15.56	28.196	36.056	2.944	23.651	0.474	-0.959	-3.582	18.622	14.143	28.819	2.983
	2.17	22.811	26.565	65.072	-2.799	28.345	34.344	42.765	-1.947	25.826	35.029	24.446	0.915	10.575	32.965	32.268	2.936	22.537	32.195	39.772	0.449	25.058	32.083	38.087	-0.219	21.255	26.762	58.471	-4.931	7.188	25.981	38.995	1.112	15.248	13.17	39.534	2.577	15.56	28.196	36.056	2.944	23.651	0.474	-0.959	-3.582	18.622	14.143	28.819	2.983
	6.205	22.811	26.565	65.072	1.954	28.345	34.344	42.765	-1.947	25.826	34.847	24.446	0.915	10.575	32.965	32.268	2.936	22.537	32.195	39.772	2.813	25.058	32.083	36.151	-0.219	21.255	26.762	58.471	-4.931	7.188	25.981	38.995	1.112	15.248	13.17	39.534	2.577	15.56	28.196	36.056	2.944	23.651	0.474	-0.959	-3.582	18.622	14.143	28.819	-12.211
	6.205	22.811	26.565	41.971	1.954	28.345	34.344	42.765	-1.947	25.826	34.847	24.446	0.915	10.575	32.965	32.268	2.936	22.537	32.195	36.95	2.813	25.058	32.083	36.151	-0.219	21.255	26.762	58.471	-3.801	7.188	22.553	30.948	1.112	22.146	13.17	39.534	2.577	15.56	28.196	36.056	2.944	23.651	0.474	-0.959	-3.582	18.622	14.143	28.819	-12.211
	6.205	22.811	26.565	41.971	1.954	28.345	34.344	42.765	-1.947	25.826	34.847	24.446	0.915	10.575	32.965	32.268	2.936	22.537	32.195	36.95	2.813	25.058	32.083	36.151	-0.219	21.255	26.762	58.471	-3.801	7.188	22.553	30.948	1.112	22.146	13.17	39.534	2.577	16.375	28.196	36.056	2.944	23.651	0.474	-0.959	-3.582	18.622	14.143	28.819	-12.211
	6.205	22.811	26.565	41.971	1.954	28.345	34.344	50.794	-1.947	25.826	34.847	24.446	0.915	10.575	32.965	32.268	2.936	22.537	32.195	36.95	2.813	25.058	32.083	21.307	-0.219	18.174	26.762	58.471	-3.801	23.489	22.553	30.948	1.112	22.146	13.17	39.534	2.577	16.375	28.196	36.056	2.944	23.651	0.474	-0.959	-3.582	18.622	14.143	28.819	-12.211
	6.205	22.811	26.565	41.971	1.954	28.345	34.344	50.794	-1.947	25.826	34.847	24.446	0.915	10.575	32.965	32.268	2.936	20.446	32.195	37.159	2.813	25.058	32.083	21.307	-0.219	18.174	26.762	53.004	-3.801	23.489	22.553	30.948	1.112	22.146	13.17	39.534	2.577	16.375	28.196	36.056	2.944	23.651	0.474	-0.959	-3.582	18.622	14.143	28.819	-12.211
	6.205	22.811	26.565	41.971	1.954	28.345	34.344	50.794	-1.947	36.047	34.847	24.446	0.915	10.575	32.965	32.268	2.936	20.446	32.195	37.159	-0.003	25.058	32.083	17.026	-0.219	18.258	26.762	53.004	-3.801	23.489	22.553	31.938	1.112	22.146	13.17	39.534	2.577	16.375	28.196	36.056	2.944	23.651	0.474	-0.959	-3.582	18.622	14.143	28.819	-12.211
	6.205	22.811	26.565	49.208	1.954	28.345	34.344	50.794	-1.947	36.047	34.847	24.446	0.915	10.575	32.965	32.268	2.936	20.446	32.195	37.159	-0.003	25.058	32.083	17.026	-3.719	18.258	26.762	53.004	-3.801	23.489	33.367	31.938	1.112	22.146	13.17	39.534	2.577	16.375	28.196	36.056	2.944	23.651	0.474	-0.959	-3.582	18.622	14.143	28.819	-12.211
	6.205	22.811	26.565	49.208	1.954	28.345	34.344	50.794	-1.947	24.147	34.847	24.446	0.915	10.575	32.965	32.268	2.936	20.446	32.195	37.159	-0.003	25.058	32.083	17.026	-3.719	18.258	26.762	53.004	-3.801	23.489	33.367	31.938	1.112	22.146	13.17	39.534	2.577	18.93	28.196	36.056	2.944	23.651	0.474	-0.959	-3.582	18.622	14.143	28.819	-12.211
	6.205	22.811	26.565	49.208	1.954	28.345	34.344	50.794	-1.947	24.147	34.847	24.446	0.915	10.575	32.965	32.268	2.936	20.446	32.195	37.159	-0.003	25.058	30.955	15.751	-3.719	18.258	26.762	53.004	-3.801	23.489	33.367	31.938	1.112	21.373	13.17	39.534	-0.727	18.93	28.196	36.056	2.944	23.651	0.474	-0.959	-3.582	18.622	14.143	28.819	-12.211
	6.205	22.811	26.565	50.637	1.954	28.345	34.344	38.979	-1.947	24.147	34.847	24.446	0.915	10.575	32.965	32.268	2.936	20.446	32.195	37.159	-0.003	25.058	30.955	15.751	-3.719	18.258	26.762	53.004	-3.801	23.489	33.367	42.834	1.112	21.373	13.17	41.1	-0.727	18.93	28.196	36.056	2.944	23.651	0.474	-0.959	-3.582	18.622	14.143	28.819	-1.528
	6.205	22.811	26.565	50.637	1.954	28.345	34.344	38.979	-1.947	5.39	34.847	24.446	0.915	10.575	32.965	32.268	2.936	20.446	32.195	37.159	-0.003	25.058	30.955	15.751	-3.719	18.258	26.762	53.004	-3.801	23.489	33.367	42.834	1.112	21.373	13.17	41.1	-0.727	18.93	28.196	36.056	2.944	23.651	0.474	-0.959	-3.582	18.622	14.143	28.819	-1.528
	6.205	22.811	26.565	50.637	1.954	28.345	34.344	38.979	-1.947	5.39	34.847	24.446	0.915	10.575	32.965	32.268	2.936	20.446	32.195	38.585	-0.003	25.058	30.955	15.751	-8.123	18.258	26.762	53.004	-3.801	23.489	33.367	42.834	1.112	21.373	29.951	41.1	-0.727	18.93	28.196	36.056	2.944	23.651	0.474	-0.959	-3.582	18.622	14.143	28.819	-1.528
	6.205	22.811	26.565	50.637	1.954	28.345	34.344	54	1.557	5.39	34.847	24.446	0.915	10.575	32.965	32.268	2.936	20.446	32.195	38.585	-0.003	25.058	30.955	31.91	-8.123	18.258	26.762	53.004	12.598	23.489	33.367	42.834	1.112	21.373	29.951	41.1	-0.727	18.93	28.196	36.056	2.944	23.651	0.474	-0.959	-3.582	18.622	14.143	28.819	-1.528
	6.205	22.811	26.565	26.645	1.954	28.345	34.344	54	1.557	12.981	34.847	24.446	0.915	10.575	32.965	32.268	2.936	20.446	32.195	38.585	-0.003	25.058	31.664	31.91	-8.123	18.258	26.762	53.004	12.598	23.489	33.367	53.558	1.112	23.489	29.951	41.1	-0.727	18.93	28.196	36.056	2.944	23.651	0.474	-0.959	-3.582	18.622	14.143	28.819	-1.528
	6.205	22.811	26.565	26.645	1.954	28.345	34.344	54	1.557	12.981	34.847	24.446	0.915	10.575	32.965	32.268	2.936	20.446	32.195	38.585	-0.003	25.058	31.664	31.91	-0.749	18.258	26.762	53.004	12.598	23.489	33.367	53.558	-7.368	23.489	29.951	41.1	-0.727	13.803	28.196	36.056	2.944	23.651	0.474	-0.959	-3.582	25.101	14.143	28.819	-1.528
	6.205	22.811	26.565	26.645	1.954	28.345	34.344	54	1.557	12.981	34.847	24.446	0.915	10.575	32.965	32.268	2.936	20.446	32.195	27.318	-0.003	25.058	31.664	31.91	-0.749	18.258	26.762	53.004	12.598	23.489	27.462	53.558	-7.368	23.489	29.951	33.779	-0.727	13.803	28.196	36.056	2.944	23.651	0.474	-0.959	-3.582	25.101	14.143	28.819	-1.528
	6.205	22.811	26.565	26.645	1.954	26.447	34.344	54	1.557	12.981	34.847	24.446	0.915	10.575	32.965	32.268	2.936	20.446	32.195	27.318	-0.003	25.058	31.664	31.91	-0.749	18.258	26.762	53.004	12.598	23.489	27.462	53.558	-7.368	23.489	18.931	33.779	-0.727	13.803	28.196	36.056	2.944	23.651	0.474	-0.959	-3.582	25.101	14.143	28.819	4.59
	6.205	22.811	26.565	26.645	1.954	26.447	34.344	54	1.557	12.981	34.847	24.446	0.915	10.575	32.965	32.268	2.936	24.524	32.195	27.318	-0.003	25.058	32.365	31.91	-0.749	18.258	26.762	53.004	12.598	23.489	27.462	53.558	-7.368	23.489	18.931	33.779	-0.727	13.803	28.196	36.056	2.944	23.651	0.474	-0.959	-3.582	25.101	14.143	28.819	4.59
	6.205	22.811	26.565	26.645	1.954	26.447	34.344	54	1.557	12.981	34.847	24.446	0.915	10.575	32.965	32.268	2.936	24.524	32.195	27.318	-0.003	25.058	32.365	31.91	-0.749	18.258	26.762	53.004	12.598	23.489	27.462	59.295	-7.368	23.489	18.931	33.779	-0.727	13.803	28.196	36.056	2.944	23.651	0.474	-0.959	-3.582	25.101	14.143	28.819	4.59
	6.205	22.811	26.565	26.645	1.954	26.447	34.344	54	1.557	12.981	34.847	24.446	-0.253	10.575	32.965	32.268	2.936	24.524	32.195	27.318	-0.003	25.058	32.365	31.91	-0.749	18.258	26.762	53.004	12.598	23.489	27.462	59.295	-7.368	23.489	18.931	33.779	-0.727	13.803	28.196	36.056	2.944	23.651	0.474	-0.959	-3.582	25.101	14.143	28.819	4.59
	6.205	22.811	26.565	31.831	1.954	26.447	34.344	25.814	1.557	12.981	34.847	24.446	-0.253	10.575	32.965	32.268	2.936	24.524	32.195	43.473	-0.003	25.058	14.405	36.763	-0.749	18.258	26.762	53.004	12.598	23.489	27.462	35.606	-7.368	23.489	18.931	33.779	-0.727	13.803	28.196	36.056	2.944	23.651	0.474	-0.959	-3.582	25.101	16.642	28.819	4.59
	6.205	22.811	26.565	31.831	1.954	26.447	36.568	25.814	1.557	12.981	34.847	24.446	-0.253	10.575	32.965	32.268	2.936	24.524	32.195	43.473	-0.003	25.058	14.405	36.763	-0.749	18.258	26.762	53.004	6.699	23.489	27.462	35.606	-7.368	23.489	18.931	33.779	-0.727	13.803	28.196	36.056	2.944	23.651	0.474	-0.959	-3.582	25.101	16.642	28.819	4.59
	6.205	22.811	26.565	31.831	1.954	26.447	36.568	25.814	1.557	12.981	34.847	24.446	-0.253	10.575	32.965	32.268	2.936	24.524	32.195	46.807	-0.003	25.058	14.405	36.763	-0.749	18.258	26.762	53.004	6.699	23.489	25.993	35.606	-7.368	16.12	18.931	44.534	-6.336	13.803	28.196	36.056	2.944	23.651	0.474	-0.959	-3.582	25.101	16.642	28.819	4.59
	6.205	22.811	26.565	36.834	1.954	26.447	31.287	25.814	1.557	12.981	34.847	24.446	-0.253	10.575	32.965	32.268	2.936	19.184	32.195	46.807	-0.003	25.058	14.405	34.576	-0.749	18.258	26.762	53.004	14.457	23.489	25.993	35.606	-7.368	16.12	22.918	44.534	-6.336	13.803	28.196	36.056	2.944	23.651	0.474	-0.959	-3.582	25.101	16.642	45.527	-4.271
	6.205	22.811	26.565	36.834	1.954	26.447	31.287	25.814	1.557	12.981	34.847	24.446	-0.253	10.575	32.965	32.268	2.936	19.184	32.195	46.807	-0.003	25.058	14.405	34.576	-0.749	18.258	26.762	53.004	14.457	23.489	25.993	35.606	7.404	16.12	22.918	44.534	-6.336	13.803	28.196	36.056	2.944	23.651	0.474	-0.959	-3.582	25.101	16.642	45.527	-4.271
	6.205	22.811	26.565	26.555	1.954	26.447	31.287	41.301	1.557	12.981	34.847	24.446	-0.253	10.575	32.965	32.268	2.936	19.184	32.195	46.807	2.665	25.058	14.405	34.576	-0.749	18.258	26.762	53.004	14.457	23.489	24.718	35.606	7.404	16.12	22.918	44.534	-6.336	13.803	28.196	36.056	2.944	23.651	0.474	-0.959	-3.582	25.101	16.642	45.527	-4.271
	6.205	22.811	26.565	37.666	1.954	26.447	31.287	41.301	1.557	12.981	34.847	24.446	-0.253	10.575	32.965	32.268	2.936	19.184	32.195	46.807	2.665	25.058	14.405	34.576	-0.749	18.258	26.762	53.004	-4.94	23.489	24.718	35.606	7.404	16.12	25.029	44.534	-6.336	13.803	28.196	36.056	2.944	23.651	0.474	-0.959	-3.582	25.101	16.642	45.527	-4.271
	6.205	22.811	26.565	37.666	1.954	26.447	31.287	40.304	1.557	12.981	34.847	24.446	-0.253	10.575	32.965	32.268	2.936	19.184	32.195	43.683	2.665	25.058	14.405	37.02	-0.749	18.258	26.762	53.004	-4.94	23.489	26.513	35.606	7.404	16.12	25.029	44.534	-6.336	13.803	28.196	36.056	2.944	23.651	0.474	-0.959	-3.582	25.101	16.642	45.527	-4.271
	6.205	22.811	26.565	37.666	-0.123	26.447	31.287	40.304	1.557	12.981	34.847	24.446	-0.253	10.575	32.965	32.268	2.936	19.184	32.195	43.683	2.665	25.058	14.405	37.02	-0.749	18.258	26.762	53.004	-4.94	23.489	26.513	40.267	-4.975	16.12	25.029	44.534	-6.336	13.803	28.196	36.056	2.944	23.651	0.474	-0.959	-3.582	25.101	44.542	45.527	7.014
	6.205	22.811	26.565	37.666	-0.123	32.654	31.287	40.304	1.557	12.981	34.847	24.446	-0.253	10.575	32.965	32.268	2.936	19.184	32.195	43.683	2.665	25.058	14.405	37.02	-0.749	18.258	26.762	53.004	-4.94	23.489	26.513	40.267	-4.975	16.12	25.029	44.534	-6.336	9.226	28.196	36.056	-3.346	23.651	0.474	-0.959	-3.582	25.101	44.542	45.527	7.014
	6.205	22.811	26.565	36.287	-0.123	32.654	31.287	40.304	1.557	12.981	34.847	24.446	-0.253	10.575	32.965	32.268	2.936	20.504	32.195	49.723	2.665	25.058	14.405	37.02	-0.749	18.258	26.762	53.004	-4.94	23.489	26.513	40.267	-4.975	16.12	25.029	44.534	6.104	9.226	28.196	36.056	-3.346	23.651	0.474	-0.959	-3.582	28.435	44.542	45.527	7.014
	6.205	22.811	26.565	36.287	-0.123	32.654	31.287	40.304	4.88	12.981	34.847	24.446	-0.253	10.575	32.965	32.268	2.936	20.504	32.195	49.723	2.665	25.058	14.405	37.02	-0.749	18.258	26.762	50.975	-4.94	23.489	21.724	40.267	-4.975	16.12	25.029	43.159	6.104	9.8	28.196	36.056	-3.346	23.651	0.474	-0.959	-3.582	28.435	44.542	45.527	7.014
	6.205	22.811	26.565	36.287	-0.123	32.654	35.167	40.304	4.88	12.981	34.847	24.446	-0.253	10.575	32.965	32.268	2.936	20.504	32.195	49.723	2.665	25.058	14.405	37.02	-0.749	18.258	26.762	50.975	-4.94	23.489	21.724	40.267	-1.179	16.12	25.029	43.159	1.739	9.8	28.196	36.056	-3.346	23.651	0.474	-0.959	-3.582	28.435	44.542	45.527	7.014
	6.205	22.811	26.565	36.287	-0.123	23.495	35.167	31.758	4.88	12.981	34.847	24.446	-0.253	10.575	32.965	32.268	2.936	20.504	32.195	56.119	2.665	25.058	14.405	37.02	-0.749	18.258	26.762	50.975	-4.94	23.489	21.724	40.267	-1.179	16.12	25.029	43.159	1.739	9.8	28.196	36.056	-3.346	23.651	0.474	-0.959	-3.582	28.435	44.542	45.527	7.014
	6.205	22.811	26.565	36.287	-0.123	23.495	35.167	31.758	4.88	12.981	34.847	24.446	-0.253	10.575	32.965	32.268	2.936	20.504	32.195	56.119	2.665	25.058	14.405	37.02	-0.749	18.258	26.762	50.975	-4.94	23.489	21.724	40.267	-1.179	16.12	25.029	43.159	1.739	11.853	28.196	36.056	-3.346	23.651	0.474	-0.959	-3.582	28.435	44.542	45.527	7.014
	6.205	22.811	26.565	36.287	-0.123	23.495	35.167	33.175	4.88	12.981	37.037	24.446	-0.253	10.575	32.965	32.268	2.936	20.504	32.195	56.119	2.665	25.058	14.405	37.02	-0.749	18.258	26.762	50.975	-4.94	23.489	21.724	40.267	-1.179	16.12	25.029	43.159	1.739	11.853	28.196	36.056	-3.346	23.651	0.474	-0.959	-3.582	28.435	44.542	45.527	7.014
	6.205	22.811	26.565	36.287	-0.123	12.783	35.167	33.175	4.88	12.981	37.037	24.446	-0.253	10.575	32.965	32.268	2.936	20.504	32.195	56.119	2.665	25.058	14.405	37.02	-0.749	18.258	26.762	50.975	-4.94	23.489	21.724	35.655	-1.179	16.12	25.029	43.159	1.739	18.777	28.196	36.056	-3.346	23.651	0.474	-0.959	-3.582	28.435	26.51	45.527	7.014
	6.205	22.811	26.565	39.065	-0.123	12.783	28.611	33.175	4.88	12.981	37.037	24.446	-0.253	10.575	32.965	32.268	2.936	20.504	32.195	56.119	2.665	25.058	14.405	37.02	-0.749	32.661	26.762	50.975	-4.94	23.489	29.844	35.655	-1.179	16.12	25.029	43.159	1.739	18.777	28.196	36.056	-3.346	23.651	0.474	-0.959	-3.582	28.435	26.51	45.527	7.014
	6.205	22.811	26.565	39.065	-0.123	12.783	28.611	39.574	4.88	12.981	37.037	24.446	-0.253	10.575	32.965	32.268	2.936	20.504	32.195	56.119	2.665	25.058	15.366	37.02	-0.749	32.661	26.762	50.975	-4.94	23.489	29.844	35.655	-1.179	16.12	25.029	43.159	1.739	18.777	28.196	36.056	-3.346	23.651	0.474	-0.959	-3.582	28.435	18.319	45.527	7.014
	6.205	22.811	26.565	39.065	-0.123	18.707	28.611	39.574	4.88	12.981	37.037	24.446	-0.253	10.575	32.965	32.268	2.936	20.504	32.195	56.119	7.098	25.058	15.366	37.02	-0.749	32.661	26.762	60.926	-4.94	23.489	29.844	35.655	-1.179	13.408	25.029	43.159	1.739	12.309	28.196	36.056	-3.346	23.651	0.474	-0.959	-3.582	28.435	18.319	45.527	7.014
	6.205	22.811	26.565	39.065	-0.123	18.707	28.611	39.574	4.88	12.981	37.037	24.446	-0.253	21.021	32.965	32.268	2.936	20.504	32.195	56.119	7.098	25.058	15.508	37.02	-0.052	32.661	26.762	60.926	-0.173	23.489	29.844	35.655	-1.179	13.408	25.029	43.159	1.739	12.309	28.196	36.056	-3.346	23.651	0.474	-0.959	-3.582	28.435	18.319	45.527	7.014
	6.205	22.811	26.565	33.425	-0.123	18.707	28.611	39.574	-0.037	12.981	37.037	24.753	-0.253	21.021	32.965	32.268	2.936	20.504	32.195	56.119	7.098	25.058	15.508	37.02	-0.052	32.661	26.762	60.926	-0.173	23.489	23.63	35.655	-1.179	13.408	25.029	43.159	-3.138	12.309	28.196	36.056	-3.433	23.651	0.474	-0.959	-3.582	28.435	18.319	45.527	7.014
	6.205	22.811	26.565	33.425	-0.123	18.707	28.611	39.574	-0.037	12.981	37.037	24.753	-0.253	21.021	32.965	32.268	2.936	20.504	32.195	56.119	7.098	25.058	15.508	37.02	-0.052	32.661	26.762	60.926	-0.173	23.489	23.63	35.655	-1.179	13.408	25.029	43.159	-3.138	20.413	28.196	36.056	-3.433	23.651	0.474	-0.959	-3.582	28.435	18.319	45.527	7.014
	6.205	22.811	26.565	33.425	-0.123	18.707	28.611	30.409	-0.037	12.981	37.037	24.753	-0.253	21.021	32.965	32.268	2.936	20.504	32.195	56.119	8.232	25.058	15.508	37.02	-0.052	32.661	26.762	60.926	-0.173	23.489	20.134	35.655	-1.179	13.408	25.029	43.159	-3.138	20.413	28.196	36.056	-3.433	23.651	0.474	-0.959	-3.582	28.435	29.484	45.527	7.014
	6.205	20.911	26.565	33.764	-2.917	18.707	28.611	30.409	-0.037	12.981	37.037	26.744	-0.253	21.021	32.965	32.268	2.936	20.504	32.195	56.119	8.232	25.058	15.508	37.02	-0.052	31.26	26.762	60.926	2.273	23.489	20.134	35.655	-1.179	14.621	25.029	43.159	-3.138	20.413	28.196	36.056	-3.433	23.651	0.474	-0.959	-3.582	28.435	29.484	45.527	7.014
	6.205	20.911	26.565	33.764	-2.917	23.976	28.611	40.505	-0.037	12.981	37.037	26.744	-0.253	21.021	32.965	32.268	2.936	20.504	32.195	56.119	8.232	25.058	15.508	37.02	-0.052	31.26	26.762	60.926	2.273	23.489	20.134	35.655	-1.179	14.621	25.029	43.159	-3.138	20.413	28.196	36.056	-3.433	23.651	0.474	-0.959	-3.582	28.435	29.484	57.346	7.014
	6.205	20.911	26.565	44.301	1.709	23.976	28.611	40.505	-0.037	12.981	37.037	26.744	-0.253	21.021	32.965	32.268	2.936	20.504	32.195	56.119	8.232	25.058	15.508	37.02	-0.052	31.26	26.762	60.926	2.273	23.489	21.536	35.655	-1.179	26.784	25.029	43.159	-2.339	20.413	28.196	36.056	-3.433	23.651	0.474	-0.959	-3.582	28.435	29.484	57.346	7.014
	6.205	20.911	26.565	44.301	-2.594	23.976	28.611	27.963	-0.037	12.981	37.037	26.744	-0.253	21.021	32.965	32.268	2.936	20.504	32.195	56.119	8.232	25.058	15.508	37.02	-0.052	31.26	26.762	47.903	2.273	23.489	23.954	35.655	-1.179	26.784	25.029	43.159	-2.339	20.413	28.196	36.056	-2.949	23.651	0.474	-0.959	-3.582	28.435	29.484	57.346	7.014
	6.205	20.911	26.565	35.162	-2.594	23.976	28.611	27.963	-0.037	12.981	37.037	26.744	-0.253	21.021	32.965	32.268	2.936	20.504	32.195	56.119	8.232	25.058	15.508	37.02	-0.052	31.26	26.762	47.903	2.273	23.489	23.954	35.655	-1.179	26.784	25.029	40.492	-2.339	20.413	28.196	36.056	-2.949	23.651	-5.897	-0.959	-3.582	28.435	28.781	57.346	7.014
	6.205	20.911	26.565	35.162	-2.594	23.976	28.611	27.963	-0.037	12.981	37.037	26.744	-0.253	21.021	32.965	32.268	-1.693	20.504	32.195	56.119	8.232	25.058	15.508	37.02	5.038	31.26	26.762	47.903	2.273	23.489	23.954	35.655	-1.179	28.39	25.029	40.492	-2.339	20.413	28.196	36.056	-2.949	23.651	-5.897	-0.959	1.993	28.435	28.781	57.346	7.014
	6.205	20.911	26.565	30.681	-2.594	23.976	28.611	27.963	-0.037	12.981	37.037	26.744	-0.253	21.021	32.965	32.268	-1.693	20.504	32.195	56.119	-4.363	25.058	15.508	37.02	5.038	31.26	26.762	47.903	2.273	23.489	23.954	35.655	4.57	28.39	23.809	40.492	-2.339	20.413	28.196	36.056	-2.949	23.651	-5.897	-0.959	1.993	28.435	28.781	57.346	7.014
	6.205	20.911	26.565	30.681	-2.594	23.976	28.611	27.963	-0.037	12.981	37.037	26.744	-0.253	21.021	32.965	32.268	-1.693	20.504	32.195	56.119	-4.363	25.058	15.508	37.02	5.038	31.26	28.835	47.903	2.273	23.489	23.954	35.655	4.57	17.141	23.809	40.492	-2.339	20.413	28.196	36.056	-2.949	23.651	-5.897	-0.959	1.993	28.435	28.781	57.346	0.29
	6.205	20.911	26.565	30.681	-2.594	23.976	28.611	27.963	-0.037	12.981	37.037	26.744	-0.253	21.021	32.965	32.268	-1.693	20.504	32.195	43.163	-4.363	25.058	15.508	37.02	5.038	31.26	28.835	47.903	2.273	23.489	23.954	35.655	4.57	17.141	23.809	40.492	-2.339	20.413	28.196	36.056	-2.949	23.651	-5.897	-0.959	1.993	28.435	28.781	57.346	0.29
	6.205	20.911	26.565	30.681	2.081	23.976	28.611	27.963	-9.354	12.981	37.037	26.744	-0.253	21.021	32.965	32.268	-1.693	20.504	32.195	43.163	-4.363	25.058	15.508	37.02	15.693	31.26	28.835	47.903	2.273	23.489	23.954	35.655	4.57	13.718	23.809	40.492	-2.339	20.413	28.196	36.056	-2.949	23.651	-5.897	-0.959	1.993	28.435	28.781	36.987	1.203
	1.157	20.911	26.565	30.681	2.081	23.976	28.611	27.963	-9.354	12.981	37.037	26.744	-0.253	21.021	32.965	32.268	-1.693	20.504	32.195	43.163	0.924	25.058	15.508	37.02	15.693	31.26	28.835	47.903	2.273	23.489	21.773	35.655	4.57	13.718	23.809	40.492	-2.339	20.413	28.196	36.056	-2.949	23.651	-5.897	-0.959	1.993	28.435	28.781	36.987	1.203
	1.157	20.911	26.565	30.681	4.699	23.976	28.611	27.963	-9.354	12.981	37.037	26.744	-0.253	21.021	32.965	32.268	-1.693	20.504	32.195	34.745	0.924	25.058	15.508	33.088	15.693	31.26	28.835	47.903	2.273	23.489	21.773	35.655	4.57	13.718	23.809	45.351	-2.339	20.413	28.196	36.056	-2.949	23.651	-5.897	-0.959	1.993	28.435	27.3	36.987	1.203
	1.157	20.911	26.565	30.681	4.699	23.976	28.611	27.963	-9.354	12.981	37.037	26.744	-0.253	21.021	32.965	32.268	-1.693	20.504	32.195	54.576	0.924	25.058	15.508	33.088	15.693	31.26	28.835	47.903	2.273	23.489	21.773	40.013	4.57	13.718	23.809	45.351	-2.339	20.413	28.196	36.056	-2.949	23.651	-5.897	-0.959	0.88	28.435	27.3	40.362	2.428
	1.157	20.911	26.565	24.586	4.699	23.976	28.611	27.963	-9.354	12.981	37.037	26.744	-0.253	21.021	32.965	32.268	-1.693	20.504	32.195	54.576	0.924	25.058	15.508	33.088	15.693	31.26	28.835	47.903	2.273	23.489	21.773	40.013	4.57	13.718	23.809	45.351	-2.339	20.413	28.196	36.056	-2.949	23.651	-5.897	-0.959	0.88	28.435	27.3	40.362	2.428
	1.157	20.911	26.565	24.586	0.268	23.976	28.611	27.963	-9.354	12.981	37.037	27.577	-0.253	21.021	32.965	32.268	-1.693	20.504	32.195	33.439	0.924	25.058	15.508	33.088	15.693	31.26	28.835	47.903	2.273	23.489	21.773	40.013	4.57	13.718	23.809	45.351	1.168	20.413	28.196	36.056	-2.949	23.651	-5.897	-0.959	0.88	28.435	28.614	40.362	2.428
	1.157	20.911	26.565	24.586	0.268	23.976	28.611	37.978	-9.354	12.981	37.037	27.577	-0.253	21.021	32.965	32.268	-1.693	20.504	32.195	33.439	0.924	25.058	15.508	33.088	15.693	31.26	28.835	47.903	2.273	23.489	21.773	40.013	3.574	13.718	23.809	45.351	1.168	20.413	28.196	36.056	-2.949	23.651	-5.897	-0.959	0.88	28.435	28.614	40.362	2.428
	1.157	20.911	26.565	24.586	0.268	23.976	28.611	37.978	-9.354	12.981	37.037	27.577	-0.253	21.021	32.965	32.268	-1.693	20.504	32.195	41.123	0.924	25.058	15.508	33.088	15.693	31.26	28.835	47.903	2.273	23.489	21.773	32.457	3.574	9.438	23.809	40.608	1.168	19.41	28.196	36.056	-2.949	23.651	-5.897	-0.959	0.88	28.435	28.614	40.362	2.428
	1.157	20.911	26.565	24.586	0.268	23.976	28.611	26.828	-9.354	12.981	37.037	27.577	-0.253	21.021	32.965	32.268	-1.693	20.504	32.195	41.123	0.924	25.058	15.508	33.088	15.693	31.26	28.835	47.903	2.273	20.76	21.773	32.457	2.74	9.438	23.809	40.608	1.168	19.41	28.196	36.056	-2.949	23.651	-5.897	-0.959	0.88	28.435	27.101	40.362	2.428
	1.157	20.911	26.565	24.586	0.268	23.976	28.611	26.828	-9.354	12.981	37.037	27.442	-0.253	21.021	32.965	32.268	-1.693	20.504	32.195	41.123	0.924	25.058	15.508	33.088	15.693	31.26	28.835	42.5	2.273	20.76	41.887	32.457	2.74	17.496	23.809	40.608	1.168	12.004	28.196	36.056	-2.949	23.651	-5.897	-0.959	0.88	28.435	27.101	31.479	2.428
	-1.468	23.906	26.565	24.586	0.268	23.976	28.611	26.828	-9.354	12.981	37.037	27.442	-0.253	21.021	32.965	32.268	-1.693	20.504	32.195	34.844	0.924	11.484	13.705	33.088	15.693	31.26	28.835	42.5	2.273	20.76	41.887	32.457	2.74	17.496	23.809	40.608	1.168	12.004	28.196	36.056	-2.949	12.856	-5.897	-0.959	0.88	28.435	27.101	31.479	-11.21
	-1.468	23.906	26.565	24.586	0.268	23.976	28.611	26.828	-9.354	12.981	37.037	27.442	-0.253	21.021	32.965	32.268	-1.693	20.504	32.195	34.844	0.924	11.484	13.705	33.088	15.693	31.26	28.835	42.5	2.273	20.76	41.887	32.457	2.74	17.496	23.809	40.608	1.168	16.82	28.196	36.056	-2.949	12.856	-5.897	-0.959	0.88	28.435	27.101	31.479	-11.21
	-1.468	23.906	26.565	24.586	0.268	23.976	34.134	26.828	-9.354	12.981	37.037	27.442	-0.253	21.021	32.965	32.268	-1.693	20.504	32.195	34.844	0.924	11.484	13.705	33.088	15.693	31.26	28.835	42.5	2.273	20.76	41.887	32.457	2.74	17.496	23.809	40.608	1.168	16.82	28.196	36.056	-2.949	12.856	-5.897	-0.959	0.88	28.435	27.101	31.479	-11.21
	-1.468	23.906	26.565	24.586	0.268	23.976	35.924	26.828	-9.354	12.981	37.037	25.908	-0.253	21.021	32.965	32.268	-1.693	20.504	32.195	34.844	0.924	11.484	13.705	33.088	15.693	31.26	28.835	42.02	2.273	20.76	41.887	32.457	2.74	17.496	23.809	40.608	1.168	16.82	28.196	36.056	-2.949	12.856	-5.897	-0.959	0.88	28.435	27.101	37.183	-11.21
	-1.523	23.906	26.565	24.586	0.268	23.976	35.924	26.828	-9.354	12.981	36.188	25.908	-0.253	21.021	37.098	32.268	-1.693	20.504	32.195	34.844	0.924	11.484	13.705	33.088	15.693	31.26	28.835	42.02	2.273	20.76	41.887	32.457	2.74	17.496	23.809	40.608	1.168	16.82	28.196	36.056	-2.949	12.856	-5.897	-0.959	0.88	28.435	27.101	37.183	-11.21
	-1.523	23.906	26.565	24.586	0.268	23.976	35.924	26.828	-9.354	12.981	36.188	25.908	-0.253	21.021	37.098	32.268	-1.693	20.504	32.195	34.844	0.924	9.261	13.705	33.088	15.693	31.26	28.835	42.02	2.273	20.76	41.887	32.457	2.74	17.496	23.809	40.608	1.168	16.82	28.196	36.056	-2.949	12.856	-5.897	-0.959	0.88	28.435	27.101	37.183	2.545
	-1.523	23.906	26.565	24.586	0.268	23.976	27.592	26.828	-9.354	12.981	36.188	25.908	-0.253	21.021	37.098	32.268	-1.693	20.504	32.195	34.844	0.924	9.261	13.705	33.088	15.693	31.26	28.835	42.02	2.273	20.76	41.887	32.457	-9.734	17.496	23.809	40.608	1.168	16.82	28.196	36.056	-2.949	12.856	-5.897	-0.959	0.88	28.435	27.101	37.183	2.545
	-0.418	23.906	26.565	31.541	0.268	23.976	27.592	26.828	-9.354	12.981	36.188	25.908	4.677	21.021	37.098	32.268	-1.693	20.504	32.195	34.844	0.924	9.261	13.705	33.088	15.693	31.26	28.835	42.02	2.273	-10.261	41.887	32.457	-9.734	17.496	23.809	40.608	1.168	16.82	28.196	36.056	-2.949	12.856	-5.897	-0.959	0.88	28.435	26.416	37.183	2.545
	-0.418	23.906	26.565	31.541	0.268	23.976	28.752	26.828	-9.354	12.981	36.188	25.908	4.677	21.021	37.098	32.268	-1.693	20.504	32.195	41.42	0.924	9.261	13.705	33.088	15.693	31.26	28.835	42.177	2.273	-10.261	41.887	34.902	-9.734	17.496	31.787	40.608	1.168	16.82	28.196	36.056	-2.949	12.856	-5.897	-0.959	0.88	28.435	26.416	37.183	2.545
	-0.418	23.906	26.565	27.446	0.268	23.976	28.752	26.828	-9.354	13.406	36.188	25.908	4.677	21.021	37.098	32.268	-1.693	20.504	32.195	41.42	0.924	9.261	13.705	33.088	15.693	31.26	28.835	42.177	2.273	-10.261	41.887	34.902	5.376	17.496	31.787	40.608	1.168	16.82	28.196	36.056	-2.949	16.753	-5.897	-0.959	0.88	28.435	26.416	37.183	2.545
	-0.418	23.906	26.565	27.446	0.268	23.976	28.752	26.828	-9.354	13.406	36.188	32.245	4.677	21.021	37.098	32.268	-1.693	20.504	32.195	35.211	0.924	9.261	13.705	33.088	15.693	31.26	28.835	42.177	2.273	34.711	41.887	34.902	5.376	17.496	31.787	40.608	1.168	16.82	28.196	36.056	-2.949	16.753	-5.897	-0.959	0.88	9.622	26.416	37.183	-0.383
	-0.418	23.906	26.565	27.446	0.268	23.976	35.741	30.558	-9.354	13.406	36.188	32.245	4.677	24.69	37.098	32.268	-1.693	27.384	32.195	35.211	0.924	9.261	13.705	33.088	15.693	31.26	28.835	42.177	4.097	34.711	41.887	34.902	5.376	17.496	31.787	40.608	1.168	16.82	28.196	36.056	-2.949	9.353	-5.897	-0.959	0.88	9.622	26.416	37.183	-0.383
	-0.418	23.906	26.565	27.446	-9.363	23.976	35.741	30.558	-9.354	11.619	36.188	32.245	4.677	24.69	37.098	32.268	-1.693	27.384	32.195	40.962	0.924	9.246	13.705	31.161	15.693	31.26	28.835	42.177	4.097	13.95	41.887	34.902	5.376	17.496	26.293	40.608	1.168	16.82	28.196	36.056	-2.949	9.353	-5.897	-0.959	0.88	8.677	26.416	37.183	-0.383
	4.579	23.906	26.565	27.446	-9.363	23.976	35.741	30.558	-9.354	11.619	36.188	32.245	-0.958	24.69	37.098	32.268	-1.693	27.384	32.195	40.962	0.924	9.246	13.705	31.161	15.693	31.26	28.835	42.177	4.097	13.95	41.887	34.902	5.376	17.496	26.293	40.608	1.168	16.82	28.196	36.056	-2.949	9.353	-5.897	-0.959	0.88	8.677	26.416	31.726	-0.383
	4.579	23.906	26.565	27.446	-0.857	23.976	35.741	30.558	-9.354	11.619	36.188	32.245	-0.958	24.69	37.098	32.268	-1.693	27.384	32.195	40.962	0.924	9.246	13.705	31.161	1.083	31.26	28.835	42.177	4.097	28.576	41.887	34.902	5.376	17.496	26.293	40.608	1.168	16.82	28.196	36.056	-2.949	9.353	-5.897	-0.959	0.88	8.677	26.416	31.726	-0.383
	4.579	23.906	26.565	27.446	-0.857	23.976	35.794	30.558	-9.354	11.619	36.188	32.245	-0.958	24.69	37.098	32.268	-1.693	29.05	32.195	40.962	0.924	9.246	13.705	31.161	1.083	31.26	14.451	42.177	4.097	28.576	41.887	34.902	5.376	17.496	26.293	40.608	1.168	16.82	28.196	36.056	-2.949	9.353	-5.897	-0.959	0.88	8.677	26.416	48.396	-0.383
	4.579	23.906	26.565	27.446	-0.857	23.976	35.794	48.026	-3.721	11.619	36.188	27.752	-0.958	24.69	37.098	32.268	-1.693	29.05	32.195	40.962	0.924	9.246	13.705	31.161	1.083	31.26	14.451	42.177	4.097	14.486	41.887	34.902	-2.704	17.496	26.293	40.608	1.168	16.82	28.196	36.056	-2.949	9.353	-5.897	-0.959	0.88	8.677	26.416	48.396	-0.383
	4.579	23.906	26.565	27.446	-0.857	23.976	16.801	48.026	-3.721	11.619	36.188	27.752	-0.958	24.69	37.098	32.268	-1.693	29.05	32.195	40.962	0.924	9.246	13.705	31.161	1.083	31.26	24.604	42.177	4.097	14.486	41.887	34.902	-2.704	17.496	23.034	40.608	1.168	16.82	28.196	36.056	-2.949	9.353	-5.897	-0.959	0.88	8.677	26.416	48.396	-5.651
	5.645	23.906	26.565	27.446	-0.296	23.976	16.801	48.026	-3.721	11.619	36.188	27.752	-0.958	24.69	37.098	32.268	-1.693	29.05	32.195	40.962	0.924	9.246	13.705	31.161	1.083	31.26	24.604	42.177	4.097	14.486	41.887	34.902	-2.704	17.496	23.034	40.608	1.168	16.82	28.196	36.056	-2.949	9.353	-5.897	-0.959	0.88	8.677	26.416	48.396	-5.651
	2.759	23.906	26.565	27.446	-0.296	23.976	16.801	48.026	-3.721	11.619	36.188	27.752	-0.958	24.69	37.098	32.268	-1.693	29.05	32.195	40.962	0.924	9.246	13.705	31.161	1.083	31.26	24.604	42.177	4.097	14.486	41.887	34.902	-2.704	17.496	23.034	42.739	1.168	16.82	28.196	36.056	-2.949	9.353	-5.897	-0.959	0.88	8.677	26.416	48.396	-5.651
	2.759	23.906	26.565	27.446	-0.296	23.976	25.496	48.026	-3.721	11.619	36.188	27.752	-0.958	24.69	37.098	32.268	-1.693	29.05	32.195	40.962	0.924	9.246	13.705	31.161	3.818	31.26	24.604	42.177	4.097	14.486	41.887	34.902	-2.704	17.496	19.664	42.739	1.168	16.82	28.196	36.056	-2.949	9.353	-5.897	-0.959	0.88	8.677	26.416	48.396	-5.651
	2.759	23.906	26.565	45.761	-0.296	23.976	25.496	48.026	-3.721	11.619	36.188	27.752	-0.958	24.69	37.098	32.268	-1.693	29.05	32.195	40.962	0.924	9.246	13.705	31.161	3.818	31.26	24.604	42.177	4.097	14.486	41.887	34.902	-2.704	17.496	19.664	42.739	1.168	16.82	28.196	36.056	-2.949	9.353	-5.897	-0.959	3.035	8.677	26.416	48.396	-5.651
	2.759	13.844	26.565	45.761	-0.296	23.976	18.705	48.026	-3.721	11.619	36.188	27.752	-0.958	24.69	37.098	32.268	-1.693	29.05	32.195	40.962	0.924	9.246	13.705	31.161	3.818	31.26	24.604	42.177	4.445	16.928	41.887	34.902	-2.704	17.496	19.664	42.739	1.168	16.82	28.196	36.056	-2.949	9.353	-5.897	-0.959	3.035	8.677	26.416	45.023	-5.651
	2.759	13.844	26.565	45.761	-0.296	23.976	18.705	47.351	-3.721	11.619	36.188	27.752	-0.958	24.69	37.098	32.268	-1.693	29.05	32.195	40.962	0.924	9.246	13.705	31.161	3.818	31.26	24.604	42.177	4.445	16.928	41.887	34.902	-2.704	17.496	19.664	42.739	1.168	16.82	28.196	36.056	-2.949	9.353	-5.897	-0.959	3.035	8.677	26.416	45.023	-5.651
	2.759	13.844	26.565	26.578	-0.296	23.976	18.705	47.351	-8.645	11.619	36.188	27.752	-0.958	24.69	37.098	32.268	-1.693	29.05	32.195	40.962	0.924	9.246	13.705	31.161	3.818	31.26	24.604	42.177	1.51	16.928	41.887	34.902	-2.704	17.496	24.47	25.901	1.168	16.82	28.196	36.056	-2.949	9.353	-5.897	-0.959	3.035	8.677	26.416	45.023	-5.651
	2.759	13.844	26.565	26.578	0.215	23.976	14.438	47.351	-8.645	11.619	36.188	27.015	-0.958	24.69	35.585	32.268	-1.693	12.099	32.195	40.962	0.924	9.246	13.705	31.161	3.818	31.26	24.604	42.177	1.51	16.928	41.887	34.902	-2.704	17.496	24.47	25.901	1.168	16.82	28.196	36.056	-2.949	9.353	-5.897	-0.959	3.035	8.677	26.416	45.023	-5.651
	2.759	13.844	26.565	26.578	0.215	23.976	14.438	47.351	2.641	11.619	36.188	27.015	-0.958	24.69	35.585	32.268	-1.693	12.099	32.195	40.962	0.924	9.246	13.705	31.161	3.818	31.26	25.339	42.177	1.51	16.928	41.887	34.902	-2.704	17.496	24.47	45.74	1.168	16.82	28.196	36.056	-2.949	9.353	-5.897	-0.959	3.035	8.677	26.416	45.023	-5.651
	2.759	13.844	26.565	26.578	0.215	23.976	23.37	47.351	2.641	11.619	36.188	27.015	-0.958	24.69	35.585	32.268	-1.693	12.099	32.195	40.962	0.924	9.246	13.705	31.161	3.818	31.26	25.339	42.177	1.51	16.928	41.887	34.902	-2.704	17.496	24.47	45.74	1.168	16.82	28.196	36.056	-2.949	9.353	-5.897	-0.959	3.035	8.677	26.416	46.605	6.047
	2.759	13.844	26.565	26.578	0.215	23.976	23.37	47.351	2.641	11.619	36.188	38.295	-0.958	24.69	35.585	32.268	-1.693	12.099	32.195	40.962	0.924	9.246	13.705	31.161	3.818	31.26	25.339	42.177	1.51	16.928	41.887	34.902	3.426	17.496	24.47	45.74	1.168	16.82	28.196	36.056	-2.949	9.353	-5.897	-0.959	3.035	8.677	26.416	46.605	6.047
	2.759	13.844	26.565	26.578	0.215	23.976	23.37	47.351	2.641	11.619	36.188	38.295	-0.837	24.69	35.585	32.268	-1.693	12.874	32.195	40.962	0.924	9.246	13.705	31.161	3.818	31.26	25.339	42.177	1.51	16.928	41.887	34.902	3.426	17.496	24.47	45.74	1.168	16.82	28.196	36.056	-2.949	9.353	-5.897	-0.959	3.035	8.677	26.416	46.605	6.047
	2.759	13.844	26.565	26.578	0.215	23.976	23.37	47.351	2.641	11.619	36.188	38.295	-0.837	24.69	35.585	32.268	-1.906	12.874	32.195	40.962	0.924	9.246	13.705	31.161	3.818	31.26	25.339	42.177	1.51	4.444	41.887	34.902	3.426	29.839	24.726	52.123	1.168	16.82	28.196	36.056	-2.949	9.353	-5.897	-0.959	3.035	8.677	26.416	46.605	6.047
	2.759	13.844	26.565	26.578	0.842	23.976	15.22	47.351	2.641	11.619	36.188	38.295	-0.837	24.69	35.585	32.268	-1.906	12.874	32.195	40.962	0.924	9.246	13.705	31.161	3.818	31.26	25.339	42.177	1.51	4.444	41.887	34.902	3.426	31.898	24.726	52.123	1.168	16.82	28.196	36.056	-2.74	9.353	-5.897	-0.959	3.035	8.677	26.416	46.605	6.047
	2.759	13.844	26.565	26.578	0.842	23.976	15.22	47.351	2.641	11.619	36.188	38.295	-0.837	24.69	35.585	32.268	-1.906	12.874	32.195	40.962	0.924	9.246	13.705	31.161	3.818	29.537	25.339	42.177	1.51	4.444	41.887	34.902	-7.191	31.898	24.726	52.123	1.168	16.82	28.196	36.056	-2.74	9.353	-5.897	-0.959	3.035	8.677	26.416	46.605	6.047
	2.759	13.844	26.565	26.578	0.842	23.976	15.22	47.351	2.641	11.619	36.188	38.295	-0.837	24.69	35.585	32.268	-1.906	22.909	32.195	40.962	0.924	9.246	13.705	31.161	3.818	29.537	25.339	42.177	1.51	4.444	41.887	34.902	-7.191	31.898	24.726	52.671	1.168	16.82	28.196	36.056	-2.74	9.353	-5.897	-0.959	3.035	8.677	26.416	34.971	6.047
	2.759	20.262	26.565	26.578	0.842	23.976	15.22	47.351	2.641	11.619	36.188	38.295	-0.837	24.69	35.585	32.268	-1.906	22.909	32.195	40.962	0.924	9.246	13.705	31.161	-0.311	29.537	25.339	42.177	1.51	4.444	41.887	34.902	-7.191	18.933	24.726	52.671	1.168	16.82	28.196	36.056	-2.74	14.731	-5.897	-0.959	3.035	8.677	20.942	34.971	6.047
	2.759	20.262	26.565	26.578	0.842	23.976	15.22	47.351	2.641	11.619	36.188	38.295	-0.837	24.69	35.585	32.268	-1.906	22.909	32.195	39.64	0.924	9.246	13.705	31.161	-0.311	29.537	25.339	42.177	1.51	4.444	41.887	34.902	-7.191	18.933	24.726	52.671	1.168	16.82	28.196	36.056	-2.74	14.731	-5.897	-0.959	3.035	8.677	20.942	34.971	6.047
	2.759	20.262	26.565	26.578	10.18	23.976	15.22	47.351	2.641	11.619	36.188	37.332	-0.837	24.69	35.585	32.268	-1.906	22.909	32.195	39.64	0.924	9.246	13.705	31.161	-0.311	29.537	33.74	42.177	1.51	4.444	41.887	34.902	-7.191	18.933	16.513	54.144	1.168	16.82	28.196	36.056	-2.74	14.731	-5.897	-0.959	3.035	8.677	20.942	34.971	6.047
	2.759	20.262	26.565	26.578	10.18	23.976	15.22	47.351	2.641	11.619	36.188	37.332	-0.837	24.69	35.585	32.268	-1.906	22.909	32.195	39.64	0.924	9.246	13.705	31.161	-0.311	29.537	33.74	42.177	1.51	4.444	41.887	34.902	3.386	18.933	16.513	54.144	1.168	16.049	28.196	36.056	-2.74	14.731	-5.897	-0.959	3.035	8.677	20.942	34.971	1.277
	2.759	20.262	26.565	26.578	0.066	23.976	15.22	47.351	2.641	11.619	36.188	42.277	-0.837	24.69	35.585	32.268	-4.145	22.909	32.195	39.64	0.924	9.246	13.705	31.161	-0.311	29.537	33.74	42.177	1.51	4.444	41.887	34.902	3.386	18.933	16.513	52.174	1.168	16.049	28.196	36.056	-2.74	14.731	-5.897	-0.529	3.035	8.677	20.942	35.879	1.277
	2.759	12.653	26.565	26.578	0.066	23.976	15.22	47.351	2.641	14.156	36.188	42.277	-0.837	24.69	35.585	32.268	-4.145	22.909	32.195	39.64	0.924	9.246	13.705	31.161	-0.311	35.097	33.74	42.177	1.51	4.444	41.887	34.902	3.386	18.933	16.513	52.174	1.168	16.049	28.196	36.056	-2.74	14.731	-5.897	-0.529	3.035	8.677	20.942	35.879	1.277
	2.759	12.653	26.565	26.578	0.066	23.976	15.22	47.351	2.641	14.156	36.188	42.277	-0.837	24.69	35.585	32.268	-4.145	22.909	32.195	39.64	0.924	9.246	13.705	31.161	-0.311	35.097	33.74	42.177	1.51	4.444	41.887	34.902	3.386	18.933	35.059	52.174	1.168	20.862	28.196	36.056	-2.74	14.731	-5.897	-0.529	3.035	8.677	20.942	35.879	1.277
	2.759	12.653	26.565	26.578	0.066	23.976	15.22	47.351	2.641	14.156	36.188	45.174	-0.837	24.69	35.585	32.268	-4.145	22.909	32.195	39.64	0.924	9.246	13.705	31.161	-0.311	35.097	33.698	42.177	1.51	4.444	41.887	34.902	3.386	18.933	35.059	52.174	1.168	20.862	28.196	36.056	-2.74	14.731	-5.897	-0.529	3.035	8.677	20.942	35.879	1.277
	2.759	12.653	26.565	26.578	0.066	19.17	15.22	47.351	2.641	14.156	36.188	45.174	-0.837	24.69	35.585	32.268	-4.145	22.909	32.195	39.64	0.924	9.246	13.705	31.161	-0.311	35.097	33.698	42.177	1.51	4.444	41.887	34.902	1.779	18.933	35.059	52.174	1.168	20.862	28.196	36.056	-2.74	14.731	-5.897	-0.377	3.035	8.677	20.942	42.412	1.277
	2.759	12.653	26.565	26.578	0.066	19.17	15.22	47.351	2.641	14.156	36.188	45.174	-0.837	24.69	11.627	32.268	-4.145	22.909	32.195	39.64	0.924	9.246	13.705	31.161	-0.311	35.097	33.698	42.177	1.51	4.444	41.887	34.902	1.779	18.933	24.645	52.174	1.168	20.862	28.196	36.056	-2.74	14.731	-5.897	-0.377	3.035	8.677	20.942	42.412	1.277
	2.759	7.203	26.565	26.578	0.066	34.919	15.22	46.341	2.641	14.156	36.188	45.174	5.318	24.69	11.627	32.268	-4.145	22.909	32.195	39.64	0.924	9.246	13.705	31.161	-0.311	35.097	33.698	42.177	-4.648	4.444	41.887	34.902	1.779	18.933	24.645	52.174	1.168	20.862	28.196	36.056	-2.74	14.731	-5.897	-0.377	3.035	8.677	20.942	42.412	1.277
	2.759	7.203	26.565	26.578	0.066	34.919	15.22	46.341	2.641	14.156	36.188	43.967	5.318	24.69	11.627	32.268	-4.145	16.178	32.195	39.64	0.924	9.246	13.705	31.161	-0.311	35.097	33.698	42.177	-4.648	4.444	41.887	36.18	1.779	18.933	24.645	52.174	1.168	20.862	28.196	36.056	-2.74	14.731	-5.897	-0.377	3.035	8.677	21.324	42.412	1.277
	2.759	7.203	26.565	26.578	0.066	34.919	15.22	46.341	2.641	12.993	36.188	43.967	5.318	24.69	11.627	32.268	-4.145	16.178	32.195	39.64	0.924	9.246	13.705	31.161	-0.311	35.097	33.698	42.177	-4.648	4.444	41.887	36.18	1.779	18.933	24.645	52.174	1.168	20.862	28.196	36.056	-2.74	14.731	-5.897	-0.377	3.035	8.677	21.324	42.412	1.277
	2.759	7.203	26.565	26.578	0.066	34.919	15.22	46.341	2.641	12.993	36.188	43.967	5.318	24.69	10.716	32.268	-4.145	16.178	32.195	39.64	0.924	9.246	13.705	31.161	-0.311	35.097	33.698	42.177	-4.648	4.444	41.887	54.361	-0.74	18.933	19.272	52.174	1.168	20.862	28.196	36.056	-2.74	14.731	-5.897	-0.377	3.035	8.677	21.324	42.412	1.277
	2.759	7.203	26.565	26.578	0.066	34.919	15.22	46.341	2.641	12.993	36.188	43.967	5.318	24.69	10.716	32.268	-4.145	16.178	32.195	39.64	0.924	9.246	13.705	31.161	-0.311	35.097	33.698	42.177	-4.648	4.444	41.887	54.361	-0.74	18.933	19.272	52.174	1.168	20.862	28.196	36.056	-2.74	14.731	-5.897	-0.377	3.035	8.677	21.324	42.412	1.277
	2.759	7.203	26.565	26.578	0.066	34.919	15.22	46.341	2.641	12.993	36.188	43.967	-2.901	24.69	10.716	32.268	-4.145	16.178	32.195	39.64	0.924	9.246	13.705	31.161	-0.311	35.097	33.698	42.177	-4.648	16.823	41.887	54.361	-0.74	18.933	19.272	52.174	1.168	20.862	28.196	36.056	-2.74	14.731	-5.897	-0.377	3.035	8.677	21.324	29.642	1.277
	2.759	7.203	26.565	26.578	0.066	34.919	15.22	46.341	2.641	12.993	36.188	43.967	-2.901	24.69	10.716	32.268	-4.145	16.178	32.195	39.64	0.924	9.246	13.705	31.161	-0.311	35.097	33.698	42.177	-4.648	16.823	41.887	54.361	-0.74	18.933	19.272	52.174	1.168	20.862	28.196	36.056	-2.74	14.731	-5.897	-0.377	3.035	8.677	21.324	29.642	1.277
	2.759	7.203	26.565	26.578	0.066	34.919	15.22	46.341	2.641	12.993	36.188	43.967	-3.738	24.69	10.716	32.268	-4.145	16.178	32.195	39.64	0.924	9.246	13.705	31.161	-0.311	34.049	33.698	42.177	-4.648	16.823	41.887	54.361	-0.74	18.933	19.272	52.174	1.168	20.862	28.196	36.056	-2.74	14.731	-5.897	-0.377	3.035	8.677	21.324	29.642	1.277
	2.759	7.203	26.565	26.578	0.066	34.919	15.22	46.341	2.641	12.993	36.188	43.967	-3.738	24.69	26.748	32.268	-4.145	16.178	32.195	39.64	1.196	9.246	13.705	31.161	-0.311	34.049	33.698	42.177	-4.648	16.823	41.887	54.361	-0.74	18.933	19.272	52.174	1.168	20.862	28.196	36.056	-2.74	14.731	-5.897	-0.377	3.035	8.677	21.324	29.642	1.277
	2.759	7.203	26.565	26.578	-2.33	34.919	15.22	46.341	2.641	12.993	36.188	43.967	-3.738	24.69	26.748	32.268	-4.145	16.178	32.195	39.64	1.196	9.246	13.705	31.161	-0.311	34.049	33.698	42.177	-4.648	16.823	41.887	54.361	-0.74	18.933	19.272	52.174	1.168	20.862	28.196	36.056	-3.657	14.731	-5.897	-0.377	3.035	8.677	21.324	29.642	1.277
	2.759	7.203	26.565	26.578	-2.33	34.919	15.22	46.341	2.641	12.993	36.188	43.967	-3.738	24.69	26.748	32.268	-4.145	16.178	32.195	39.64	1.196	9.246	13.705	31.161	-0.311	34.049	33.698	42.177	-4.648	16.823	41.887	54.361	-0.74	18.933	19.272	52.174	1.168	20.862	28.196	36.056	-3.657	14.731	-5.897	-0.377	3.035	8.677	21.324	29.642	1.277
	2.759	7.203	26.565	26.578	-2.33	34.919	15.22	49.863	2.641	12.993	36.188	43.967	-3.738	24.69	26.748	32.268	-4.145	16.178	32.195	39.64	1.196	9.246	13.705	31.161	-0.311	34.049	33.698	42.177	-4.648	16.823	41.887	54.361	-0.74	18.933	19.272	52.174	1.168	20.862	28.196	36.056	-3.657	14.731	-5.897	-0.377	3.035	8.677	21.324	29.642	1.277
	2.759	7.203	26.565	26.578	-2.33	34.919	15.22	49.863	2.641	12.993	36.188	43.967	-3.738	24.69	26.748	32.268	-4.145	16.178	32.195	39.64	0.598	9.246	13.705	38.605	-0.311	34.049	33.698	42.177	-4.648	16.816	41.887	54.361	-0.74	18.933	19.272	52.174	1.168	20.862	28.196	36.056	-3.657	14.731	-5.897	-0.377	3.035	8.677	21.324	29.876	1.277
	2.759	7.203	26.565	26.578	-2.33	34.919	26.393	49.863	2.641	12.993	36.188	43.967	-3.738	24.69	26.748	32.268	-7.041	16.178	32.195	39.64	0.598	9.246	13.705	38.605	-0.311	34.049	33.698	42.177	-4.648	16.816	41.887	54.361	-0.74	23.215	19.272	52.174	1.168	20.862	28.196	36.056	-3.657	14.731	-5.897	-0.377	3.035	8.677	21.324	29.876	-5.535
	2.759	7.203	26.565	26.578	-2.33	34.919	26.393	49.863	2.641	12.993	36.188	43.967	-3.738	24.69	26.748	32.268	-7.041	16.178	32.195	39.64	0.598	9.246	13.705	38.605	-0.311	34.049	33.698	42.177	-4.648	9.047	41.887	54.361	-0.74	23.215	19.272	52.174	1.168	20.862	28.196	36.056	-3.657	14.731	-5.897	-0.377	3.035	8.677	21.324	29.876	-5.535
	2.759	7.203	26.565	26.578	-2.33	34.919	26.393	49.863	2.641	12.993	36.188	43.967	-3.738	24.69	26.748	32.268	-7.041	16.178	32.195	39.64	0.598	9.246	13.705	38.605	-0.311	34.049	33.698	42.177	-4.648	9.047	41.887	54.361	11.288	15.295	19.272	52.174	1.168	20.862	28.196	36.056	-3.657	14.731	-5.897	-0.377	3.035	8.677	21.324	29.876	-5.535
	2.759	7.203	26.565	26.578	-2.33	34.919	26.393	37.706	2.641	12.993	36.188	43.967	4.32	24.69	26.748	32.268	-7.041	16.178	32.195	39.64	0.598	9.246	13.705	38.605	-0.311	34.049	33.698	42.177	-4.648	9.047	41.887	54.361	11.288	15.295	19.272	52.174	1.168	20.862	28.196	36.056	-3.657	14.731	-5.897	-0.377	3.035	8.677	21.324	39.334	-5.535
	2.759	7.203	26.565	26.578	-2.33	34.919	26.393	37.706	2.641	12.993	36.188	43.967	4.32	24.69	26.748	32.268	-7.041	17.326	32.195	39.64	0.598	9.246	13.705	38.605	-0.311	34.049	33.698	42.177	-4.648	27.789	41.887	44.016	11.288	25.864	19.272	52.174	1.168	13.471	28.196	36.056	-3.657	14.731	-5.897	-0.377	3.035	8.677	21.324	39.334	-5.535
	2.759	7.203	26.565	26.578	1.264	34.919	26.393	26.744	2.641	12.993	36.188	43.967	4.32	24.69	26.748	32.268	-7.041	17.326	32.195	39.64	0.598	9.246	13.705	38.605	-0.311	34.049	33.698	42.177	-0.362	27.789	41.887	44.016	11.288	25.864	19.272	52.174	1.168	13.471	28.196	36.056	-3.657	14.731	-5.897	-0.377	3.035	8.677	21.324	39.334	-5.535
	2.759	7.203	26.565	26.578	1.264	34.919	26.393	26.744	2.641	12.993	36.188	43.967	-2.057	24.69	26.748	32.268	-7.041	17.326	32.195	39.64	0.598	9.246	13.705	38.605	-0.311	34.049	33.698	42.177	-0.362	27.789	41.887	44.016	-5.172	25.864	19.272	52.174	1.168	13.471	28.196	36.056	-3.657	14.731	-5.897	-0.377	3.035	8.677	21.324	39.334	-22.258
	2.759	7.203	26.565	26.578	1.264	34.919	26.393	26.744	2.641	12.993	36.188	43.967	-2.057	24.69	26.748	32.268	-7.041	17.326	32.195	39.64	0.598	9.246	13.705	38.605	-0.311	34.049	33.698	42.177	-1.903	27.789	41.887	44.016	-5.172	25.864	19.272	52.174	1.168	13.471	28.196	36.056	-3.657	14.731	-5.897	-0.377	3.035	8.677	21.324	33.919	-22.258
	2.759	7.203	26.565	26.578	1.264	34.919	26.393	26.744	2.641	12.993	36.188	43.967	-2.057	24.69	26.748	32.268	-7.041	17.326	32.195	39.64	0.598	9.246	13.705	34.163	-0.311	25.749	33.698	42.177	-1.903	27.789	41.887	44.016	-5.172	25.864	19.272	52.174	1.168	13.471	28.196	36.056	-3.657	14.731	-5.897	-0.377	3.035	8.677	21.324	33.919	2.973
	2.759	7.203	26.565	26.578	1.264	34.919	16.695	44.997	2.641	12.993	36.188	43.967	-2.057	24.69	26.748	32.268	-7.041	17.326	32.195	39.64	0.598	9.246	13.705	34.163	-0.311	25.749	33.698	42.177	-1.903	27.789	41.887	44.016	-5.172	25.864	19.272	52.174	1.168	13.471	28.196	36.056	-1.801	14.731	-5.897	-0.377	3.035	8.677	21.324	33.919	2.973
	2.759	7.203	26.565	26.578	1.264	34.919	16.695	44.997	2.641	12.993	36.188	43.967	1.906	24.69	26.748	32.268	-7.041	17.326	32.195	39.64	0.598	9.246	13.705	34.163	-0.311	25.749	33.698	42.177	-1.903	27.789	41.887	44.016	-5.235	25.864	19.272	52.174	1.168	13.471	28.196	36.056	-1.801	14.731	-5.897	-0.377	3.035	8.677	21.324	33.919	2.973
	2.759	7.203	26.565	26.578	1.264	34.919	16.695	44.997	2.641	12.993	36.188	43.967	1.906	24.69	26.748	32.268	-7.041	17.326	32.195	39.64	0.598	9.246	13.705	34.163	-0.311	25.749	33.698	42.177	-1.903	27.789	41.887	44.016	-5.235	25.864	30.632	52.174	1.168	13.471	28.196	36.056	-1.801	14.731	-5.897	-0.377	3.035	8.677	21.324	33.919	2.973
	2.759	7.203	26.565	26.578	1.264	34.919	18.365	44.997	2.641	12.993	36.188	43.967	1.906	24.69	26.748	32.268	-7.041	17.326	32.195	39.64	0.598	9.246	13.705	34.163	-0.311	25.749	33.698	42.177	-1.903	27.789	41.887	35.603	-5.235	25.864	30.632	52.174	1.168	13.471	28.196	36.056	-1.801	14.731	-5.897	-0.377	3.035	8.677	21.324	33.919	2.973
	2.759	7.203	26.565	26.578	1.264	34.919	18.365	39.175	2.641	12.993	36.188	43.967	1.906	26.216	26.748	32.268	-7.041	17.326	32.195	39.64	0.598	9.246	13.705	34.163	-0.311	25.749	33.698	42.177	-1.903	27.789	41.887	35.603	-5.235	25.864	26.258	52.174	1.168	13.471	28.196	36.056	-1.801	14.731	-5.897	-0.377	3.035	8.677	21.324	33.919	2.973
	2.759	7.203	26.565	26.578	-3.397	34.919	18.365	39.175	2.641	12.993	36.188	54.055	7.227	26.216	26.748	32.268	-7.041	17.326	32.195	39.64	0.598	9.246	13.705	34.163	-0.311	25.749	33.698	42.177	-1.903	27.789	41.887	35.603	-5.235	25.864	26.258	52.174	1.168	13.471	28.196	36.056	-1.801	14.731	-5.897	-0.377	3.035	8.677	21.324	33.919	6.017
	2.759	7.203	26.565	26.578	-3.397	34.919	18.365	39.175	2.641	12.993	36.188	54.055	7.227	26.216	26.748	32.268	-7.041	17.326	32.195	39.64	0.598	9.246	13.705	34.163	-0.311	11.41	33.698	42.177	-1.903	27.789	41.887	35.603	-5.235	25.864	26.258	52.174	1.168	13.471	28.196	36.056	-1.801	14.731	-5.897	-0.377	3.035	8.677	21.324	33.919	6.017
	2.759	7.203	26.565	26.578	-3.397	34.919	6.863	40.361	2.641	12.993	36.188	54.055	-1.545	26.216	34.806	32.268	-7.041	17.326	32.195	39.64	0.598	9.246	13.705	34.163	-0.311	11.41	33.698	42.177	9.143	27.789	41.887	35.603	-5.235	25.864	26.258	52.174	-2.325	13.471	28.196	36.056	-1.801	14.731	-5.897	-0.377	3.035	8.677	21.324	33.919	6.017
	2.759	1.614	26.565	26.578	-3.397	34.919	6.863	40.361	2.641	12.993	36.188	54.055	-1.545	26.216	34.806	32.268	-7.041	17.326	32.195	39.64	0.598	9.246	13.705	34.163	-0.311	11.41	33.698	42.177	9.143	27.789	41.887	35.603	-5.235	25.864	26.258	52.174	-2.325	13.471	28.196	36.056	-1.801	14.731	-5.897	-0.377	3.035	8.677	21.324	33.919	1.181
	2.759	1.614	26.565	26.578	-3.397	34.919	6.863	40.361	2.641	12.993	36.188	54.055	-1.545	26.216	34.806	32.268	-7.041	17.326	32.195	39.64	0.598	9.246	12.38	34.163	-0.311	11.41	33.698	42.177	-0.311	27.789	41.887	35.603	-5.235	25.864	26.258	52.174	-2.325	13.471	28.196	36.056	-1.801	14.731	-5.897	-0.377	3.035	8.677	21.324	33.919	1.181
	2.759	11.499	26.565	26.578	-3.397	34.919	15.555	40.361	2.641	12.993	36.188	54.055	-1.545	26.216	40.539	32.268	-7.041	17.326	32.195	39.64	0.598	9.246	12.38	34.163	-0.311	11.41	33.698	42.177	-0.311	27.789	41.887	35.603	3.89	25.864	20.336	52.174	-2.325	13.471	28.196	36.056	-1.801	14.731	-5.897	-0.377	3.035	8.677	21.324	33.919	1.181
	2.759	11.499	26.565	26.578	-3.397	30.63	15.555	40.361	2.641	12.993	36.188	54.055	-1.545	26.216	40.539	32.268	-7.041	17.326	32.195	60.073	0.598	7.311	38.392	34.163	-0.311	11.41	33.698	42.177	-0.311	27.789	41.887	35.603	3.89	25.864	20.336	52.174	-2.325	13.471	28.196	36.056	-1.801	14.731	-5.897	-0.377	3.035	8.677	21.324	33.919	1.181
	2.759	11.499	26.565	26.578	-3.397	30.63	15.555	26.816	2.641	12.993	36.188	54.055	-1.545	26.216	40.539	32.268	-7.041	17.326	32.195	60.073	0.598	7.311	38.392	34.163	-0.311	11.41	33.698	42.177	-0.585	27.789	41.887	35.603	3.89	25.864	20.336	53.354	-2.325	13.471	28.196	36.056	-1.801	14.731	-5.897	-0.377	3.035	8.677	21.324	33.919	1.181
	2.759	11.499	26.565	26.578	-3.397	30.63	15.555	26.816	2.641	12.993	36.188	54.055	-1.545	17.234	0.876	32.268	-7.041	17.326	32.195	60.073	0.598	7.311	38.392	34.163	-0.311	11.41	33.698	42.177	-0.585	27.789	41.887	35.603	3.89	25.864	20.336	53.354	-2.325	13.471	28.196	36.056	-1.801	14.731	-5.897	-0.377	3.035	8.677	21.324	33.919	1.181
	2.759	11.499	26.565	26.578	-3.397	30.63	15.555	26.816	2.641	12.993	36.188	54.055	-1.545	17.234	0.876	32.268	-7.041	17.326	32.195	60.073	0.598	7.311	38.392	34.163	-0.311	11.41	33.698	42.177	-0.585	27.789	41.887	35.603	3.89	25.864	23.299	53.354	-2.325	13.471	28.196	36.056	-1.801	14.731	-5.897	-0.377	3.035	8.677	21.324	33.919	1.181
	2.759	11.499	26.565	26.578	-3.397	30.63	15.555	26.816	2.641	12.993	36.188	54.055	-1.545	19.335	0.876	32.268	-7.041	17.326	32.195	60.073	0.598	7.311	38.392	34.163	-0.311	9.36	33.698	42.177	-0.585	27.789	41.887	35.603	3.89	25.864	23.299	53.354	-2.325	13.471	28.196	36.056	-1.801	14.731	-5.897	-0.377	2.902	8.677	21.324	33.919	1.181
	2.759	11.499	26.565	26.578	-3.397	30.63	15.555	48.494	2.641	12.993	36.188	48.276	-1.545	19.335	0.876	32.268	-7.041	17.326	32.195	60.073	0.598	7.311	38.392	34.163	-0.311	9.36	33.698	42.177	-0.585	27.789	41.887	35.603	-0.533	25.864	23.299	53.354	-2.325	13.471	28.196	36.056	-1.801	14.731	-5.897	-0.377	2.902	8.677	21.324	33.919	1.181
	2.759	11.499	26.565	26.578	-3.397	30.63	12.594	48.494	2.641	12.993	36.188	48.276	0.833	22.979	0.876	32.268	-7.041	17.326	32.195	60.073	0.598	7.311	38.392	34.163	-0.311	9.36	33.698	42.177	-0.585	27.789	41.887	35.603	-0.533	25.864	23.299	53.354	-2.325	13.471	28.196	36.056	-1.801	14.731	-5.897	-0.377	2.902	8.677	21.324	33.919	1.181
	2.759	11.499	26.565	26.578	-3.397	30.63	12.594	48.494	2.641	12.993	36.188	48.276	0.833	22.979	1.81	36.118	-7.041	17.326	32.195	60.073	0.598	7.311	38.289	34.163	-0.311	9.36	33.698	42.177	-0.585	27.789	41.887	38.591	-0.533	25.864	23.299	53.354	-2.325	13.499	28.196	36.056	-1.801	14.731	-5.897	-0.377	2.902	8.677	21.324	33.919	1.181
	2.759	11.499	26.565	26.578	-3.397	30.63	12.594	48.494	2.641	12.993	36.188	48.276	-21.856	22.979	1.81	36.118	4.914	17.326	32.195	60.073	0.598	7.311	38.289	34.163	-0.311	9.36	33.698	42.177	-0.585	27.789	41.887	38.591	-0.533	25.864	23.299	53.354	-2.325	13.499	28.196	36.056	-1.801	14.731	-5.897	-0.377	2.902	8.677	21.324	33.919	1.181
	2.759	11.499	26.565	26.578	-3.397	30.63	12.594	48.494	2.641	12.993	36.188	48.276	-21.856	22.979	1.81	36.118	4.914	17.326	32.195	60.073	0.598	7.311	38.289	34.163	-0.311	9.36	33.698	42.177	-0.585	27.789	41.887	38.591	-0.533	25.864	23.299	53.354	-2.325	13.499	28.196	36.056	-1.801	14.731	-5.897	-0.377	2.902	8.677	21.324	33.919	1.181
	2.759	11.499	26.565	26.578	-3.397	30.63	12.594	48.494	2.641	12.993	36.188	48.276	-21.856	22.979	1.81	36.118	4.914	8.229	32.195	60.073	0.598	7.311	38.289	34.163	-0.311	9.36	33.698	42.177	-0.585	27.789	41.887	38.591	-0.533	25.864	23.299	53.354	-2.305	16.651	28.196	36.056	-1.801	14.731	-5.897	-0.377	2.902	8.677	21.324	33.919	1.181
	2.759	11.499	26.565	26.578	0.021	30.63	25.859	48.494	2.641	12.993	36.188	48.276	-1.186	22.979	1.81	36.118	-14.27	8.229	32.195	60.073	0.598	7.311	38.289	34.163	-0.311	9.36	33.698	42.177	-0.585	27.789	41.887	38.591	-0.533	25.864	23.299	53.354	-2.305	16.651	28.196	36.056	-1.801	14.731	-5.897	-0.377	2.902	8.677	21.324	33.919	1.181
	2.759	11.499	26.565	26.578	0.021	30.63	25.859	48.494	2.641	12.993	36.188	50.117	-1.186	22.979	1.81	36.118	-14.27	8.229	32.195	60.073	0.598	7.311	38.289	34.163	-0.311	9.36	34.464	42.177	-0.585	27.789	41.887	38.591	-0.533	25.864	23.299	53.354	-2.305	16.651	28.196	36.056	-1.801	14.731	-5.897	-0.377	2.902	8.677	21.324	52.517	1.181
	2.759	11.499	26.565	26.578	0.021	30.63	25.859	48.494	2.641	12.993	36.188	50.117	-1.186	22.979	16.083	36.118	-14.27	8.229	32.195	60.073	0.598	7.311	38.289	34.163	-0.311	9.36	34.464	42.177	-1.912	27.789	41.887	38.591	-0.533	25.864	23.299	53.354	-2.305	16.651	28.196	36.056	-1.801	14.731	-5.897	-0.377	2.902	8.677	21.324	52.517	1.181
	2.759	11.499	26.565	26.578	0.021	30.63	25.859	63.063	2.641	12.993	36.188	50.117	-1.186	22.979	16.083	36.118	5.009	8.229	32.195	60.073	0.598	7.311	35.877	38.683	-0.311	9.36	34.464	42.177	-1.912	27.789	41.887	38.591	-0.533	25.864	23.299	53.354	-2.305	16.651	28.196	36.056	-1.801	14.731	-5.897	-0.377	2.902	8.677	21.324	52.517	1.181
	2.759	11.499	26.565	26.578	0.021	30.63	31.32	63.063	2.641	12.993	36.188	50.117	12.153	22.979	16.083	36.154	5.009	8.229	32.195	30.705	0.598	7.311	35.877	38.683	-0.311	9.36	34.938	42.177	-1.912	27.789	41.887	40.006	-0.533	25.864	23.299	53.354	-2.305	16.651	28.196	36.056	-1.801	14.731	-5.897	-0.377	2.902	8.677	21.324	52.517	1.181
	2.759	9.914	26.565	26.578	0.021	30.63	31.32	51.388	2.641	12.993	36.188	50.117	12.153	22.979	16.083	36.154	1.47	8.229	32.195	30.705	0.598	7.311	35.877	38.683	-0.311	9.36	34.938	42.177	-1.912	27.789	41.887	40.006	-0.533	25.864	23.299	53.354	-2.305	16.651	28.196	36.056	-1.801	14.731	-5.897	-0.377	2.902	8.677	21.324	52.517	-0.844
	2.759	9.914	26.565	26.578	0.021	30.63	31.32	51.388	2.641	12.993	36.188	50.117	-13.841	22.979	16.083	36.154	1.47	8.229	32.195	30.705	0.598	7.311	35.877	38.683	-0.311	9.36	40.662	42.177	-1.912	27.789	41.887	40.006	-0.533	25.864	23.299	53.354	-2.305	16.651	28.196	36.056	-1.801	14.731	-5.897	-0.377	2.902	8.677	21.324	52.517	-0.844
	2.759	9.914	26.565	26.578	0.021	30.63	31.32	51.388	2.641	12.993	36.188	50.117	-13.841	22.979	16.083	36.154	1.47	8.229	32.195	30.705	0.598	7.311	35.877	38.683	-0.311	9.36	40.662	42.177	-1.912	27.789	41.887	40.006	-0.533	25.864	23.299	53.354	-2.305	16.651	28.196	36.056	-1.801	14.731	-5.897	-0.377	2.902	8.677	21.324	52.517	-0.844
	2.759	9.914	26.565	26.578	0.021	30.63	31.32	51.388	2.641	12.993	36.188	50.117	0.198	22.979	8.709	36.154	1.47	8.229	32.195	30.705	0.598	7.311	35.877	38.683	-0.311	9.36	40.662	42.177	-1.912	27.789	41.887	40.006	3.733	25.864	23.299	53.354	-1.274	16.651	28.196	36.056	-1.801	14.731	-5.897	-0.377	2.902	8.677	21.324	52.517	-0.844
	2.759	9.914	26.565	26.578	0.021	30.63	31.32	51.388	2.641	12.993	36.188	50.117	0.198	22.979	8.709	36.154	1.47	13.375	32.195	30.705	0.598	7.311	35.877	38.683	-0.311	9.36	40.662	42.177	-1.912	27.789	41.887	40.006	3.733	25.864	23.299	53.354	-1.274	16.651	28.196	36.056	-1.801	14.731	-5.897	-0.377	2.902	8.677	21.324	52.517	-1.66
	2.759	9.914	26.565	26.578	0.021	30.63	31.32	51.388	2.641	12.993	36.188	50.117	0.198	22.979	8.709	36.154	1.47	13.375	32.195	30.705	0.598	7.311	35.877	38.683	-0.311	9.36	40.662	42.177	-1.912	27.789	41.887	40.006	0.551	24.385	23.299	53.354	-1.274	16.651	28.196	36.056	-1.801	14.731	-5.897	-0.377	2.902	8.677	21.324	52.517	-1.66
	2.759	9.914	26.565	26.578	0.021	30.63	31.32	46.412	2.641	12.993	36.188	50.117	0.198	22.979	8.709	36.154	1.47	13.375	32.195	30.705	0.598	7.311	35.877	38.683	-0.311	9.36	40.662	42.177	12.748	27.789	41.887	42.365	0.551	24.385	23.299	53.354	-1.274	16.651	28.196	36.056	-1.801	14.731	-5.897	-0.377	2.902	8.677	21.324	52.517	-1.66
	2.759	9.914	26.565	26.578	0.021	30.63	31.32	46.412	2.641	12.993	36.188	50.117	3.371	22.979	18.957	36.154	1.47	13.375	32.195	30.705	0.598	7.311	35.877	38.683	-0.311	6.617	40.662	42.71	12.748	27.789	41.887	42.365	0.551	24.385	23.299	53.354	-1.274	16.651	28.196	23.424	-1.801	14.731	-5.897	-0.377	13.213	8.677	21.324	52.517	-1.66
	2.759	12.854	26.565	26.578	0.021	30.63	31.32	46.412	2.641	12.993	36.188	50.117	3.371	22.979	18.957	36.154	1.47	13.375	32.195	30.705	0.598	7.311	35.877	38.683	-0.311	6.617	40.662	42.71	-4.973	27.789	41.887	42.365	0.551	24.385	23.299	53.354	-1.274	16.651	28.196	23.424	-1.801	14.731	-5.897	-0.377	13.213	8.677	21.324	55.781	-1.66
	2.759	12.854	26.565	26.578	0.021	30.63	20.238	46.412	2.641	12.993	36.188	50.117	3.371	22.979	18.957	36.154	1.47	13.375	32.195	30.705	0.598	7.311	35.877	38.683	-0.311	6.617	40.662	42.71	-4.973	27.789	41.887	42.365	-5.38	24.385	23.299	53.354	-1.274	16.651	28.196	23.424	-1.801	14.731	-5.897	-0.377	13.213	8.677	21.324	55.781	-1.66
	2.759	12.854	26.565	26.578	0.021	30.63	20.238	46.412	2.641	12.993	36.188	44.529	3.371	22.979	18.957	36.154	1.47	13.375	32.195	30.705	0.598	5.478	35.877	38.683	-0.311	6.617	40.662	42.71	-4.973	27.789	41.887	42.365	-5.38	24.385	23.299	53.354	-1.274	16.651	28.196	23.424	-1.801	14.731	-5.897	-0.377	13.213	8.677	21.324	55.781	-1.66
	2.759	12.854	26.565	26.578	0.021	30.63	20.238	46.412	2.641	12.993	36.188	44.529	3.371	22.979	18.957	36.182	1.47	13.375	32.195	30.705	0.598	5.478	35.877	38.683	-0.311	6.617	40.662	42.71	-4.973	27.789	41.887	42.365	-5.38	24.385	23.299	53.354	0.052	16.651	28.196	23.424	-1.801	14.731	-5.897	-0.377	13.213	8.677	21.324	34.961	-1.66
	2.759	12.854	26.565	26.578	0.021	30.63	20.238	46.412	-10.056	12.993	36.188	44.529	3.371	22.979	18.957	36.182	1.47	13.375	32.195	30.705	0.598	5.478	35.877	38.683	-0.311	6.617	40.662	42.71	-4.973	27.789	41.887	53.305	-1.001	24.385	23.299	55.444	0.052	16.651	28.196	23.424	-1.801	14.731	-5.897	-0.377	13.213	8.677	21.324	40.456	-1.66
	2.759	10.062	26.565	26.578	0.021	30.63	8.123	46.412	-10.056	12.993	36.188	44.529	3.371	22.979	18.957	36.182	1.47	15.48	32.195	30.705	0.598	5.478	35.877	38.683	-0.311	6.617	40.662	42.71	-4.973	20.646	41.887	53.305	-1.001	24.385	23.299	55.444	0.052	16.651	28.196	23.424	-1.801	14.731	-5.897	-0.377	13.213	8.677	21.324	40.456	-1.66
	2.759	10.062	26.565	26.578	0.021	30.63	8.123	36.9	-2.129	12.993	36.188	44.529	3.371	22.979	18.957	36.182	1.47	15.48	32.195	32.775	0.598	5.478	35.877	38.683	-0.311	6.617	40.662	42.71	-4.973	20.646	41.887	53.305	-1.001	24.385	23.299	55.444	0.052	16.651	28.196	23.424	-1.801	14.731	-5.897	-0.377	13.213	8.677	21.324	40.456	-1.66
	2.759	10.062	26.565	26.578	0.021	30.63	18.982	36.9	-2.129	12.993	36.188	44.529	3.371	22.979	18.957	36.182	1.47	15.48	32.195	32.775	0.598	5.478	35.877	38.683	-0.311	6.617	40.662	42.264	-4.973	20.646	41.887	53.305	-1.001	24.385	23.299	55.444	0.052	16.651	28.196	23.424	-1.801	14.731	-5.897	-0.377	13.213	8.677	21.324	40.456	-1.66
	2.759	10.062	26.565	26.578	0.021	30.63	18.982	36.9	-2.129	12.993	36.188	44.529	3.371	22.979	18.957	36.204	1.47	15.48	32.195	32.775	0.598	5.478	35.877	38.683	-0.311	6.617	40.662	42.264	-4.973	20.646	41.887	51.632	-1.001	24.385	23.299	54.845	0.052	16.651	28.196	23.424	-1.801	14.731	-5.897	-0.377	13.213	8.677	21.324	33.415	-1.66
	2.759	10.062	26.565	26.578	0.021	30.63	18.982	36.9	-2.129	12.993	36.188	44.529	3.371	22.979	18.957	36.204	0.987	15.48	32.195	32.775	0.598	5.478	35.877	38.683	-0.311	6.617	40.662	42.264	-4.973	20.646	41.887	51.632	0.039	24.385	23.299	54.845	0.052	16.651	28.196	23.424	-1.801	14.731	-5.897	-0.377	13.213	8.677	21.324	33.415	-1.66
	2.759	10.062	26.565	45.04	0.021	30.63	18.982	36.9	-2.129	12.993	36.188	44.529	3.371	22.979	18.957	36.204	0.987	15.48	32.195	32.775	0.598	5.478	35.877	38.683	-0.311	6.617	40.662	42.264	-4.973	20.646	41.887	51.632	0.039	24.385	23.299	54.845	0.052	16.651	28.196	23.424	-1.801	14.731	-5.897	-0.377	0.83	8.677	21.324	33.415	-1.66
	2.759	10.062	26.565	38.726	0.021	30.63	18.982	36.9	-2.129	12.993	36.188	44.529	3.371	22.979	18.957	36.204	0.987	15.48	32.195	32.775	0.598	5.478	35.877	38.683	-0.311	3.673	36.839	42.264	-4.973	20.646	41.887	51.632	0.039	24.385	23.299	54.845	0.052	16.651	28.196	23.424	-1.801	14.731	-5.897	-0.377	0.83	8.677	21.324	33.415	-1.66
	2.759	10.062	26.565	38.726	0.021	30.63	18.982	36.9	-2.129	12.993	36.188	44.529	13.938	22.979	18.957	36.204	0.987	10.945	32.195	32.775	0.598	5.478	35.877	38.683	-0.311	3.673	36.839	42.264	-4.973	20.646	41.887	51.632	0.039	24.385	23.299	54.845	0.052	16.651	28.196	23.424	-1.801	14.731	-5.897	-0.377	0.83	8.677	21.324	36.513	-1.66
	2.759	10.062	26.565	38.726	3.274	30.63	18.982	54.957	-2.129	12.993	36.188	43.921	13.938	22.979	18.957	36.204	0.987	10.945	32.195	32.775	0.598	5.478	35.877	38.683	-0.311	3.673	36.839	42.264	0.737	20.646	41.465	51.632	0.039	24.385	23.299	54.845	0.052	16.651	28.196	23.424	-1.801	14.731	-5.897	-0.377	0.83	8.677	21.324	36.513	-1.66
	2.759	10.062	26.565	37.867	3.274	30.63	18.982	54.957	-2.129	12.993	36.188	43.921	-3.132	22.979	18.957	36.204	0.987	10.945	32.195	32.775	0.598	5.478	35.877	38.683	-0.311	3.673	36.839	42.264	0.737	20.646	41.465	51.632	0.039	24.385	23.299	54.845	2.74	16.651	28.196	23.424	-1.801	14.731	-5.897	-0.377	0.83	8.677	21.324	49.228	-1.66
	2.759	10.062	26.565	37.867	3.274	30.63	18.982	28.37	-2.129	12.993	36.188	43.921	-3.132	22.979	27.518	36.204	2.279	10.945	32.195	32.775	0.598	5.478	35.877	38.683	-0.311	3.673	36.839	42.264	0.737	20.646	41.465	51.632	0.039	24.385	23.299	54.845	2.74	16.651	28.196	23.424	-1.801	14.731	-5.897	-0.377	0.83	8.677	21.324	49.228	-1.66
	2.759	10.062	26.565	37.867	3.274	30.63	18.982	28.37	-2.129	12.993	36.188	43.921	-3.132	22.979	27.518	36.204	2.279	10.945	32.195	32.775	0.598	5.478	35.877	38.683	-0.311	3.673	32.1	42.264	8.946	20.646	41.465	51.632	0.039	24.385	23.299	54.845	2.74	16.651	28.196	23.424	-1.801	14.731	-5.897	-0.377	0.83	8.677	21.324	23.702	-1.66
	2.759	10.062	26.565	37.867	3.274	30.63	18.982	28.37	-2.129	12.993	36.188	43.921	0.47	22.979	11.26	36.204	2.279	10.945	32.195	32.775	0.598	6.105	35.877	38.683	-0.311	3.673	32.1	42.264	8.946	20.646	41.465	51.632	0.039	24.385	23.299	54.845	0.11	16.651	28.196	23.424	-1.801	14.731	-5.897	-0.377	0.83	8.677	21.324	23.702	-1.66
	2.759	10.062	26.565	37.867	3.274	30.63	18.982	49.803	-2.129	12.993	36.188	43.921	0.47	22.979	11.26	30.442	2.201	10.945	32.195	30.476	0.598	6.105	35.877	38.683	-0.311	3.673	32.1	42.264	8.946	20.646	41.465	36.105	0.039	24.385	23.299	54.845	0.11	16.651	28.196	23.424	-1.801	14.731	-5.897	-0.377	0.83	8.677	21.324	23.702	-1.66
	2.759	10.062	26.565	37.867	3.274	30.63	18.982	49.803	-2.129	12.993	36.188	43.921	0.47	22.979	11.26	30.442	2.201	10.945	32.195	30.476	0.598	14.41	35.877	38.683	-0.311	3.673	32.1	42.264	8.946	20.646	41.465	36.105	0.039	24.385	23.299	54.845	0.11	16.651	28.196	23.424	-1.801	14.731	-5.897	-0.377	0.83	8.677	21.324	23.702	-1.66
	2.759	10.062	26.565	37.867	3.274	30.63	18.982	49.803	-2.129	12.993	36.188	43.921	0.47	22.979	8.039	30.442	-2.903	10.945	32.195	35.138	0.598	14.41	35.877	38.683	-0.311	3.673	32.1	42.264	8.946	25.783	41.465	36.105	0.039	24.385	23.299	54.845	-0.262	16.651	28.196	23.424	-1.801	14.731	-5.897	-0.377	0.83	8.677	21.324	36.756	-1.66
	2.759	10.062	26.565	37.867	3.274	30.63	18.982	44.513	-2.129	12.993	36.188	43.921	0.47	22.979	8.039	36.192	-2.903	10.945	32.195	35.138	0.598	16.612	35.877	38.683	-0.311	3.673	32.1	42.264	8.946	25.783	41.465	36.105	0.039	24.385	23.299	44.089	-0.262	16.651	28.196	23.424	-1.801	14.731	-5.897	-0.377	0.83	8.677	21.324	36.756	-1.66
	2.759	10.062	26.565	29.536	3.274	30.63	18.982	44.513	1.919	12.993	36.188	67.77	0.47	22.979	8.039	36.192	-2.903	10.945	32.195	35.138	0.598	16.612	35.877	38.683	-0.311	3.673	32.1	42.264	8.946	25.783	41.465	37.314	0.039	24.385	23.299	44.089	-0.262	16.651	28.196	23.424	-1.801	14.731	-5.897	-0.377	0.83	8.677	21.324	36.756	-1.66
	2.759	15.816	26.565	29.536	3.274	30.63	18.982	41.89	1.919	12.993	36.188	67.77	0.47	22.979	8.039	36.192	-2.903	10.945	32.195	35.138	0.598	16.612	35.877	38.683	-0.311	3.673	32.1	42.264	-2.01	25.783	41.465	37.314	0.039	24.385	23.299	44.089	-0.262	16.651	28.196	23.424	-1.801	14.731	-5.897	-0.377	0.83	8.677	21.324	36.756	-1.66
	2.759	15.816	26.565	29.536	3.274	30.63	18.982	41.89	1.919	12.993	36.188	67.391	0.47	22.979	8.039	36.192	-2.903	10.945	32.195	35.138	0.598	16.612	35.877	45.986	-0.311	3.673	32.1	42.264	-0.77	25.783	41.465	37.314	0.039	24.385	23.299	44.089	-0.262	16.651	28.196	23.424	-1.801	14.731	-5.897	-0.377	0.83	8.677	21.324	36.756	-1.66
	-2.361	15.816	26.565	29.536	3.274	30.63	27.981	41.89	1.919	12.993	36.188	28.398	0.47	22.979	8.039	36.192	-2.903	10.945	32.195	35.138	0.598	16.612	35.877	45.986	-0.311	3.673	32.1	42.264	-0.77	25.783	41.465	37.314	0.039	24.385	23.299	44.089	-0.262	16.651	28.196	23.424	-1.801	14.731	-5.897	-0.377	0.83	8.677	21.324	36.756	-1.66
	-2.361	15.816	26.565	29.536	3.274	30.63	27.981	41.89	1.919	12.993	36.188	28.398	0.47	22.979	8.039	36.192	3.13	10.945	32.195	35.138	0.598	16.612	35.877	45.986	-0.311	3.673	32.1	42.264	-0.77	25.783	41.465	37.314	0.039	24.385	23.299	44.089	-0.262	16.651	28.196	23.424	-1.801	14.731	-5.897	-0.377	0.83	8.677	21.324	36.756	-1.66
	-2.361	15.816	26.565	29.536	-1.11	30.63	27.981	41.89	1.919	12.993	36.188	28.398	0.47	22.979	8.039	36.192	3.13	10.945	32.195	35.138	0.598	16.612	35.877	30.863	-0.311	3.673	32.1	42.264	-0.77	25.783	41.465	37.314	0.039	24.385	23.299	44.089	-0.262	16.651	28.196	23.424	-1.801	14.731	-5.897	-0.377	0.83	8.677	21.324	36.756	-1.66
	-2.361	15.816	26.565	29.536	-1.11	30.63	27.981	41.89	1.919	12.993	36.188	28.398	0.47	22.979	8.039	36.192	7.31	10.945	32.195	40.172	0.598	16.612	35.877	30.863	-0.311	3.673	32.1	42.264	-0.77	25.783	41.465	37.314	0.039	24.385	23.299	44.089	-0.262	16.651	28.196	23.424	-1.801	14.731	-5.897	-0.377	0.83	8.677	21.324	45.036	-1.66
	-2.361	15.816	26.565	29.536	-7.928	30.63	15.024	41.89	1.919	12.993	36.188	28.398	0.47	22.979	8.039	36.192	7.31	10.945	32.195	40.172	-4.295	16.612	35.877	30.863	-0.311	3.673	35.888	42.264	-0.77	25.783	41.465	37.314	0.039	24.385	23.299	44.089	-0.262	16.651	28.196	23.424	-1.801	14.731	-5.897	-0.377	0.83	8.677	21.324	45.036	-1.66
	-2.361	15.816	26.565	29.536	-7.928	30.63	15.024	41.89	1.919	12.993	36.188	28.398	0.47	22.979	8.039	36.192	0.849	10.945	32.195	40.172	-4.295	16.612	35.877	30.863	-0.311	3.673	35.888	42.264	-0.77	25.783	41.465	37.314	0.039	24.385	23.299	44.089	-0.262	16.651	28.196	23.424	-1.801	14.731	-5.897	-0.377	0.83	8.677	21.324	45.036	-1.66
	-2.361	15.816	26.565	29.536	-7.928	30.63	15.024	23.031	1.919	12.993	36.188	28.398	0.47	22.979	7.563	36.192	0.849	10.945	32.195	40.172	-4.295	16.612	35.877	30.863	-0.311	3.673	35.888	42.264	-0.77	25.783	41.465	37.314	0.039	24.385	23.299	44.089	-0.262	16.651	28.196	23.424	-1.801	14.731	-5.897	-0.377	0.83	8.677	21.324	45.036	-1.66
	-2.361	15.816	26.565	29.536	-6.706	30.63	15.024	23.031	1.919	12.993	36.188	28.398	0.47	22.979	7.563	36.192	0.849	10.945	32.195	40.172	-4.295	16.612	35.877	39.521	-0.311	3.673	35.888	42.264	-0.77	25.783	41.465	37.314	0.039	24.385	28.123	44.089	-0.262	16.651	28.196	23.424	-1.801	15.331	-5.897	-0.377	0.83	8.677	21.324	45.036	-1.66
	-2.361	15.816	26.565	29.536	-6.706	30.63	15.024	23.031	1.919	12.993	36.188	28.398	0.47	22.979	7.563	36.192	0.849	10.945	32.195	36.389	-4.295	16.612	35.877	39.521	-0.311	3.673	35.888	42.264	-0.77	25.783	41.465	37.314	0.039	24.385	28.123	44.089	-0.262	16.651	28.196	23.424	-1.801	15.331	-5.897	-0.377	-21.074	8.677	21.324	32.266	-1.66
	-2.361	15.816	26.565	29.536	-6.706	30.63	15.024	23.031	4.108	12.993	36.188	28.398	0.47	21.889	7.563	36.192	0.849	10.945	32.195	36.389	1.903	16.612	35.877	39.521	-0.311	3.673	35.888	42.264	-0.77	25.783	41.465	37.314	0.039	24.385	18.98	44.089	-0.262	16.651	28.196	23.424	-1.801	19.391	-5.897	-0.377	-21.074	8.677	21.324	32.266	-1.66
	-2.361	15.816	26.565	29.536	10.699	30.63	21.951	23.031	4.108	12.993	36.188	28.398	0.47	21.889	7.563	36.192	2.48	10.945	32.195	36.389	1.903	16.612	35.877	39.521	-0.311	3.673	35.888	42.264	-0.77	25.783	41.465	37.314	0.039	24.385	18.98	44.089	-0.262	16.651	28.196	23.424	-1.801	19.391	-5.897	-0.377	-21.074	8.677	21.324	32.266	-1.66
	-2.361	15.816	26.565	29.536	4.442	30.63	21.951	23.031	4.108	12.993	36.188	28.398	0.47	21.889	7.563	36.192	2.48	10.945	32.195	36.389	1.903	16.612	35.877	39.521	-0.311	3.673	35.888	42.264	-0.77	25.783	41.465	37.314	0.039	24.385	18.98	44.089	-0.262	16.651	28.196	23.424	-1.801	12.259	-5.897	-0.377	-21.074	8.677	21.324	32.266	-1.66
	-2.361	15.816	26.565	29.536	4.442	30.63	21.951	23.031	4.108	12.993	36.188	28.398	-1.353	21.889	7.563	36.192	2.48	10.945	32.195	36.389	1.903	16.612	35.877	39.521	-0.311	3.673	35.888	42.264	-0.77	25.783	41.465	37.314	0.039	24.385	18.98	44.089	-0.262	16.651	28.196	23.424	-1.801	12.259	-5.897	-0.377	-7.645	8.677	21.324	32.903	-1.66
	-2.361	15.816	26.565	29.536	4.442	30.63	21.951	39.052	4.108	12.993	36.188	28.398	-1.353	21.889	7.563	36.192	2.48	10.945	32.195	36.389	1.903	16.612	35.877	36.727	-0.311	3.673	35.888	42.264	-0.77	25.783	41.465	37.314	0.039	24.385	18.98	44.089	-0.262	16.651	28.196	23.424	-1.801	12.259	-5.897	-0.377	-7.645	8.677	21.324	32.903	-1.66
	2.375	15.816	26.565	30.672	4.442	30.63	21.951	39.052	1.853	12.993	36.188	28.398	-1.353	21.889	7.563	36.192	2.48	10.945	32.195	36.389	1.903	16.612	35.877	36.727	-0.311	3.673	35.888	42.264	-0.77	25.783	41.465	37.314	0.039	24.385	18.98	44.089	-0.262	16.651	28.196	23.424	-1.801	12.259	-5.897	-0.377	-7.645	8.677	21.324	32.903	-1.66
	2.375	15.816	26.565	47.861	4.442	30.63	21.951	39.052	1.853	12.993	36.188	28.398	-1.353	21.889	7.563	36.192	2.48	10.945	32.195	36.389	1.903	16.612	35.877	30.895	-0.311	3.673	35.888	42.264	-0.77	25.783	41.465	37.314	0.039	24.385	18.98	44.089	-0.262	16.651	28.196	23.424	-1.801	12.259	-5.897	-0.377	-7.645	8.677	21.324	32.903	-1.66
	2.375	15.816	26.565	47.861	4.442	30.63	21.951	39.052	1.853	13.793	36.188	28.398	-1.353	21.889	7.563	36.192	2.48	10.945	32.195	36.389	1.903	16.612	35.877	30.895	-5.102	3.673	35.888	42.264	-0.77	25.783	41.465	37.314	0.039	24.385	18.98	44.089	-0.262	16.651	28.196	23.424	-1.801	12.259	-5.897	-0.377	-7.645	8.677	21.324	32.011	-1.66
	2.375	15.816	26.565	47.861	4.442	30.63	21.951	39.052	1.853	13.793	36.188	28.398	-1.353	21.889	7.563	36.192	-16.902	10.945	32.195	36.389	1.903	16.612	35.877	30.895	-5.102	3.673	35.888	42.264	-0.77	25.783	41.465	37.314	0.039	24.385	18.98	44.089	-0.262	16.651	28.196	23.424	-1.801	12.259	-5.897	-0.377	-7.645	8.677	21.324	32.011	-1.66
	3.474	13.91	26.565	40.583	4.442	30.63	42.429	39.052	1.853	15.618	36.188	28.398	-1.353	21.889	7.563	36.192	-16.902	10.945	32.195	36.389	1.903	16.612	35.877	30.895	-5.102	3.673	35.888	42.264	-0.77	25.783	41.465	37.314	0.039	24.385	18.98	44.089	-0.262	16.651	28.196	23.424	-1.801	12.259	-5.897	-0.377	-7.645	8.677	21.324	32.011	-1.66
	3.474	13.91	26.565	40.583	4.442	30.63	42.429	39.052	1.853	15.618	36.188	28.398	-1.353	21.889	7.563	36.192	-16.902	10.945	32.195	36.389	1.903	16.612	35.877	30.895	-5.102	3.673	35.888	42.264	2.178	25.783	41.465	37.314	0.039	24.385	18.98	48.01	-0.262	16.651	28.196	23.424	-1.801	12.259	-5.897	-0.377	-7.645	8.677	21.324	49.543	-1.66
	3.474	12.853	26.565	44.17	4.442	30.63	42.429	39.052	-0.449	15.618	36.188	28.398	-1.353	21.889	7.563	36.192	-16.902	19.096	32.195	36.389	1.903	16.612	20.421	30.895	-5.102	3.673	35.888	42.264	2.178	25.783	41.465	34.11	0.039	24.385	18.98	48.01	-0.262	16.651	28.196	23.424	-1.801	12.259	-5.897	-0.377	-7.645	8.677	21.324	49.543	-1.66
	3.474	14.424	26.565	44.17	4.442	30.63	42.429	39.052	-0.449	15.618	36.188	28.398	-1.353	21.889	7.563	36.192	2.869	19.096	32.195	36.389	1.903	16.612	20.421	30.895	-5.102	3.673	35.888	42.264	2.178	25.783	41.465	34.11	0.039	24.385	18.98	48.01	-0.262	16.651	28.196	23.424	-1.801	12.259	-5.897	-0.377	-7.645	8.677	21.324	49.543	-1.66
	1.665	14.424	26.565	44.17	4.442	30.63	42.429	39.052	-0.449	15.618	36.188	28.398	-1.353	21.889	7.563	36.192	2.869	19.096	32.195	36.389	1.903	16.612	20.421	30.895	-5.102	3.673	35.888	42.264	2.178	25.783	41.465	34.11	0.039	24.385	18.98	43.719	-0.262	16.651	28.196	23.424	-1.801	12.259	-5.897	-0.377	-7.645	8.677	21.324	49.543	-1.66
	1.665	14.424	26.565	44.17	4.442	25.857	42.429	39.052	0.165	15.618	36.188	28.398	-1.353	21.889	7.563	39.337	2.869	19.096	32.195	36.389	1.903	16.612	20.421	30.895	-5.102	3.673	35.888	38.056	2.178	25.783	41.465	34.11	0.039	24.385	26.032	43.719	-0.262	16.651	28.196	23.424	-1.801	12.259	-5.897	-0.377	-7.645	8.677	21.324	27.675	-1.66
	1.665	14.424	26.565	44.17	4.442	25.857	42.429	39.052	0.165	15.618	36.188	28.398	-1.353	21.889	7.563	39.337	2.869	19.096	32.195	36.389	1.903	16.612	20.421	30.895	-5.102	3.673	35.888	38.056	2.178	25.783	41.465	34.11	0.039	24.385	26.032	43.719	-0.262	16.651	28.196	23.424	-1.801	12.259	-5.897	-0.377	-7.645	8.677	21.324	27.675	-1.66
	1.665	14.424	26.565	44.17	4.442	25.857	42.429	38.502	0.165	15.618	24.43	38.076	-4.929	21.889	7.563	39.337	3.924	19.096	32.195	36.389	1.903	16.612	20.421	30.895	-5.102	3.673	35.888	38.056	2.178	25.783	41.465	34.11	0.039	24.385	26.032	43.719	-0.262	16.651	28.196	23.424	-1.801	12.259	-5.897	-0.377	-7.645	8.677	21.324	49.674	-1.66
	1.665	14.424	26.565	58.723	4.442	25.857	42.429	38.502	-1.62	23.156	24.43	38.076	-4.929	21.889	7.563	39.337	3.924	19.096	32.195	47.229	1.903	16.612	13.006	30.895	-5.102	3.673	35.888	38.056	2.178	25.783	41.465	34.11	0.039	24.385	26.032	43.719	-0.262	16.651	28.196	33.155	-1.801	12.259	-5.897	-0.377	-7.645	8.677	21.324	49.674	-1.66
	1.665	14.424	26.565	58.723	4.442	25.857	42.429	38.502	-1.62	23.156	24.43	35.289	-4.929	21.889	7.563	39.337	3.924	19.096	32.195	47.229	1.903	16.612	13.006	30.895	-5.102	3.673	35.888	38.056	0.805	25.783	41.465	34.11	0.039	24.385	26.032	42.306	-0.262	16.651	28.196	33.155	-1.801	12.259	-5.897	-0.377	-7.645	8.677	21.324	51.511	-1.66
	-9.06	14.424	26.565	58.723	4.442	25.857	42.429	47.799	-1.62	23.156	24.43	35.289	-6.05	21.889	7.563	26.516	-1.4	19.096	32.195	47.229	1.903	16.612	9.458	30.895	-5.102	3.673	35.888	41.738	0.805	25.783	41.465	34.11	0.039	24.385	26.032	42.306	-0.262	16.651	28.196	33.155	-1.801	12.259	-5.897	-0.377	-7.645	8.677	21.324	51.511	-1.66
	-9.06	14.424	26.565	58.723	4.442	25.857	42.429	47.799	-1.62	23.156	24.43	35.289	-6.05	21.889	7.563	26.516	-1.4	19.096	32.195	31.673	1.903	16.612	9.458	30.895	-5.102	3.673	35.888	41.738	0.805	25.783	41.465	34.11	0.039	24.385	26.032	42.306	-0.262	16.651	28.196	33.155	-1.801	12.259	-5.897	-0.377	-7.645	8.677	21.324	51.511	-1.66
	-9.06	14.424	26.565	56.071	4.442	25.857	42.429	47.799	-1.62	23.156	24.43	39.173	-6.05	21.889	7.563	26.516	2.52	19.096	32.195	31.673	1.903	16.612	9.458	30.895	-5.102	3.673	35.888	15.777	0.805	25.783	41.465	34.11	0.039	24.385	27.247	42.306	-0.262	16.651	28.196	33.155	-1.801	12.259	-5.897	-0.377	-7.645	8.677	21.324	51.511	-1.66
	-9.06	14.424	26.565	56.071	4.442	25.857	42.429	47.799	3.958	23.156	24.43	39.173	-6.05	21.889	7.563	26.516	2.52	19.096	32.195	31.673	1.903	16.612	9.458	30.895	-5.102	3.673	35.888	15.777	0.805	25.783	41.465	34.11	0.039	24.385	27.247	46.042	-0.262	16.651	28.196	33.155	-1.801	12.259	-5.897	-0.377	-7.645	8.677	21.324	51.511	-1.66
	-9.06	14.424	26.565	56.071	4.442	25.857	28.964	29.301	3.958	23.156	24.43	29.119	1.336	21.889	7.563	26.516	2.52	19.096	32.195	30.691	1.903	16.612	9.458	30.895	-5.102	3.673	35.888	15.777	0.805	25.783	41.465	31.606	0.039	24.385	27.247	46.042	-0.262	16.651	28.196	33.155	-1.801	12.259	-5.897	-0.377	-7.645	8.677	21.324	44.65	-1.66
	-9.06	14.424	26.565	56.071	4.442	25.857	28.964	29.301	3.958	23.156	24.43	29.119	1.336	21.889	7.563	26.516	2.52	19.096	32.195	30.691	1.903	16.612	9.458	30.895	-5.102	3.673	35.888	15.777	0.805	25.783	41.465	31.606	0.039	24.385	27.247	46.042	-0.262	16.651	28.196	33.155	-1.801	12.259	-5.897	-0.377	-13.521	8.677	21.324	44.65	-1.66
	-9.06	14.424	26.565	56.071	4.442	25.857	28.964	27.366	3.958	23.156	24.43	29.119	1.336	21.889	7.563	26.516	2.257	19.096	32.195	30.691	1.903	16.612	9.458	30.895	-5.102	3.673	35.888	15.777	0.805	25.783	41.465	38.877	0.039	24.385	27.247	46.042	-0.262	16.651	28.196	33.155	-1.801	12.259	-5.897	-0.377	-13.521	8.677	21.324	44.65	-1.66
	-9.06	14.424	26.565	56.071	4.442	17.713	28.964	27.366	-9.411	23.156	24.43	29.119	1.336	21.889	12.579	26.516	2.257	10.4	32.195	39.392	1.903	16.612	9.458	30.895	-5.102	3.673	35.888	15.777	0.805	25.783	41.465	38.877	0.039	24.385	27.247	21.172	-0.262	16.651	28.196	33.155	-1.801	12.259	-5.897	-0.377	-13.521	8.677	21.324	44.65	-1.66
	-9.06	14.424	19.652	56.071	4.442	17.713	28.964	27.366	-9.411	23.156	24.43	29.119	1.336	21.889	12.579	26.516	2.257	10.4	32.195	39.392	1.903	16.612	60.386	30.895	-5.102	3.673	35.888	15.777	0.805	25.783	41.465	38.877	0.039	24.385	27.247	21.172	-0.262	16.651	28.196	33.155	-1.801	12.259	-5.897	-0.377	-13.521	8.677	21.324	43.514	-1.66
	-9.06	14.424	19.652	56.071	4.442	17.713	36.687	27.366	-4.058	23.156	24.43	29.119	9.168	21.889	12.579	26.516	2.257	10.4	32.195	39.392	-3.98	16.612	60.386	42.249	-5.102	3.673	35.888	15.777	0.805	25.783	41.465	31.941	0.039	24.385	16.033	21.172	-0.262	16.651	28.196	33.155	-1.801	12.259	-5.897	-0.377	-13.521	8.677	21.324	43.514	-1.66
	-4.284	14.424	19.652	56.071	4.442	17.713	36.687	27.366	-4.058	23.156	24.43	29.119	9.168	21.889	12.579	34.386	2.257	10.4	32.195	39.392	-3.98	16.612	60.386	42.249	-5.102	3.673	35.888	15.777	0.805	25.783	41.465	31.941	0.039	24.385	16.033	21.172	-0.262	16.651	28.196	33.155	-1.801	12.259	-5.897	-0.377	-13.521	8.677	21.324	43.514	-1.66
	-4.284	14.424	8.89	45.393	4.442	17.713	36.687	27.366	-4.058	23.156	24.43	29.865	9.168	21.889	12.579	34.386	-2.825	10.4	32.195	39.392	-3.964	16.612	60.386	42.249	-5.102	3.673	35.888	15.777	0.805	25.783	41.465	31.941	0.039	24.385	20.085	21.172	-0.262	16.651	28.196	33.155	-1.801	12.259	-5.897	-0.377	1.043	8.677	21.324	43.514	-1.66
	-4.284	14.424	8.89	45.393	-8.551	17.713	36.687	27.366	-4.058	23.156	24.43	29.865	12.262	21.889	12.579	34.386	-2.825	10.4	32.195	39.392	-3.964	16.612	60.386	29.585	-5.102	3.673	35.888	57.071	0.805	25.783	41.465	35.263	0.039	24.385	20.085	21.172	-0.262	16.651	28.196	33.155	-1.801	12.259	-5.897	-0.377	1.043	8.677	21.324	43.514	-1.66
	-4.284	14.424	8.89	45.393	-8.551	17.713	36.687	27.366	-4.058	23.156	24.43	29.865	12.262	21.889	25.265	34.386	-2.825	10.4	32.195	39.392	-3.964	16.612	60.386	29.585	-5.102	3.673	35.888	57.071	0.805	25.783	41.465	35.263	0.039	24.385	20.085	21.172	-0.262	16.651	28.196	23.389	-1.801	12.259	-5.897	-0.377	1.043	8.677	21.324	43.514	-1.66
	-4.284	14.424	8.89	45.393	-8.551	17.713	36.687	27.366	-4.058	23.156	24.43	37.452	4.488	21.889	25.265	34.386	-2.825	10.4	32.195	39.392	-3.964	16.612	37.218	29.585	-5.102	3.673	35.888	57.071	0.805	25.783	41.465	35.263	0.039	24.385	20.085	17.516	-0.262	16.651	28.196	23.389	-1.801	12.259	-5.897	-0.377	8.016	8.677	21.324	43.514	-1.66
	-4.284	14.424	8.89	45.393	-8.551	25.749	36.687	27.366	-4.058	23.156	24.43	37.452	4.488	21.889	25.265	34.386	4.34	10.4	32.195	39.392	-3.964	16.612	37.218	29.585	-5.102	3.673	35.888	57.071	0.805	25.783	41.465	35.263	0.039	24.385	20.085	17.516	-0.262	16.651	28.196	23.389	-1.801	12.259	-5.897	-0.377	8.016	8.677	21.324	43.514	-1.66
	-4.284	14.424	13.629	45.393	-8.551	25.749	36.687	27.366	-4.058	14.437	24.43	37.452	4.488	21.889	25.265	49.07	4.34	10.4	32.195	41.69	-3.964	16.612	37.218	29.585	-5.102	3.673	35.888	57.071	0.805	25.783	41.465	35.263	0.039	24.385	20.085	17.516	-0.262	16.651	28.196	23.389	-1.801	12.259	-5.897	-0.377	-9.78	8.677	21.324	43.514	-1.66
	-4.284	14.424	13.629	45.393	-8.551	24.788	36.687	27.366	-4.058	14.437	24.43	43.238	4.488	21.889	25.265	49.07	-0.962	10.4	32.195	41.69	-3.964	16.612	37.218	29.585	-5.102	3.673	35.888	57.071	0.805	25.783	41.465	35.263	0.039	24.385	20.085	17.516	-0.262	16.651	28.196	23.389	-1.801	12.259	-5.897	-0.377	-9.78	8.677	21.324	43.514	-0.755
	-4.284	14.424	13.629	45.393	-8.551	24.788	36.687	27.366	-4.058	14.437	24.43	43.238	4.488	21.889	28.492	49.07	-0.962	9.722	32.195	41.69	-3.964	16.612	37.218	29.95	-5.102	15.167	35.888	57.071	0.805	25.783	41.465	46.74	0.039	24.385	20.085	17.516	-0.262	16.651	28.196	23.389	-1.801	12.259	-5.897	-0.377	2.61	8.677	21.324	33.35	-0.755
	-4.284	14.424	13.629	45.393	-8.551	24.788	36.687	27.366	3.839	14.437	24.43	43.238	4.488	21.889	28.492	30.6	-0.962	9.722	32.195	41.69	-3.964	16.612	37.218	29.95	-5.102	15.167	35.888	57.071	0.805	25.783	41.465	46.74	0.039	24.385	20.085	17.516	-0.262	16.651	28.196	23.389	-1.801	12.259	-5.897	-0.377	2.61	8.677	21.324	33.35	-0.755
	-4.284	14.424	13.629	45.393	-8.551	24.788	36.687	27.013	3.839	15.222	24.43	43.238	4.488	18.377	28.492	30.6	-0.962	9.722	32.195	47.875	-3.964	16.612	37.218	29.95	-5.102	15.167	35.888	57.071	0.805	25.783	41.465	46.74	0.039	24.385	25.256	17.516	-0.262	16.651	28.196	23.389	-1.801	12.259	-5.897	-0.377	2.61	8.677	21.324	33.35	-0.755
	-4.284	14.424	13.629	45.393	-8.551	24.788	36.687	27.013	3.839	15.222	24.43	43.238	-2.675	18.377	28.492	30.6	-0.962	9.722	32.195	47.875	-3.964	16.612	37.218	29.95	-5.102	15.167	35.888	67.107	0.805	25.783	41.465	46.74	0.039	24.385	25.256	17.516	0.212	16.651	28.196	23.389	-1.801	12.259	-5.897	-0.377	2.61	8.677	21.324	33.35	-0.755
	-4.284	14.424	13.629	45.393	-8.551	24.788	36.687	27.013	3.839	15.222	24.43	43.238	-2.675	18.377	28.492	25.451	-0.962	9.722	32.195	47.875	-3.964	16.612	37.218	29.95	-5.102	13.813	35.888	67.107	0.805	25.783	41.465	46.74	0.039	24.385	25.256	17.516	0.212	16.651	28.196	23.389	-1.801	12.259	-5.897	-0.377	2.61	8.677	21.324	33.35	-0.755
	-4.284	14.424	13.629	45.393	0.072	24.788	36.687	26.304	3.839	15.222	24.43	28.464	-1.578	18.377	28.492	25.451	-0.962	9.722	32.195	64.792	-3.964	16.612	37.218	29.95	5.404	13.813	35.888	67.107	0.805	25.783	41.465	46.74	0.039	24.385	25.256	17.516	0.212	16.651	28.196	23.389	-1.801	12.259	-5.897	-0.377	2.61	8.677	21.324	33.35	-0.755
	-4.284	14.424	13.629	45.393	0.072	24.788	36.687	26.304	3.839	15.222	27.63	28.464	-1.578	18.377	28.492	25.451	-0.962	9.722	32.195	64.792	-3.964	16.612	37.218	29.95	5.404	13.813	35.888	54.11	0.805	25.783	41.465	46.74	0.039	24.385	34.533	17.516	0.212	16.651	28.196	23.389	-1.801	12.259	-5.897	-0.377	2.61	11.956	21.324	33.35	-0.755
	-4.284	14.424	13.629	45.393	0.072	24.788	36.687	26.304	3.839	15.222	27.63	28.464	-1.578	18.377	28.492	25.451	-0.962	9.722	32.195	64.792	-3.964	16.612	37.218	27.876	-19.791	13.813	35.888	54.11	0.805	25.783	41.465	46.74	0.039	24.385	34.533	17.516	0.212	20.208	28.196	23.389	-1.801	12.259	-5.897	-0.377	2.61	11.956	21.324	29.933	-0.755
	-4.284	14.424	13.629	45.393	0.072	24.788	36.687	26.304	3.839	15.222	27.63	28.464	-1.578	18.377	28.492	25.451	5.956	9.722	32.195	44.478	-3.964	16.612	37.218	27.876	-19.791	13.813	35.888	54.11	0.805	25.783	41.465	46.74	0.039	24.385	34.533	17.516	0.212	20.208	28.196	23.389	-1.801	12.259	-5.897	-0.377	2.61	11.956	21.324	29.933	-0.755
	-4.284	14.424	13.629	45.393	0.072	24.788	36.687	26.304	3.839	15.222	27.63	28.464	-1.578	18.377	28.492	25.451	5.956	9.722	32.195	44.478	-3.964	16.612	37.218	27.876	-9.879	13.813	35.888	54.11	0.805	25.783	41.465	46.74	0.039	24.385	34.533	17.516	0.212	20.208	28.196	23.389	-1.801	12.259	-5.897	-0.377	2.61	11.956	21.324	33.43	-0.755
	-4.284	14.424	13.629	32.656	0.072	24.788	36.687	26.304	3.839	15.222	27.63	28.464	-1.578	18.377	28.492	25.116	5.956	9.722	32.195	44.478	-3.964	16.612	32.977	27.876	-9.879	13.813	35.888	54.11	0.805	25.783	41.465	46.74	0.039	24.385	34.533	17.516	0.212	20.208	28.196	23.389	-1.801	12.259	-5.897	-0.377	2.61	11.956	21.324	33.43	-0.755
	-4.284	14.424	13.629	32.656	0.072	24.788	36.687	24.774	3.839	15.222	27.63	28.464	-1.578	18.377	32.617	25.116	5.956	9.722	32.195	44.478	-3.964	16.612	32.977	27.876	-9.879	13.813	35.888	54.11	0.805	25.783	41.465	38.946	0.039	24.385	34.533	17.516	0.212	20.208	28.196	23.389	-1.801	12.259	-5.897	-0.377	-0.249	11.956	21.324	33.43	-0.755
	-4.284	14.424	13.735	32.656	0.072	24.788	22.366	24.774	3.839	15.222	27.63	28.464	-1.578	18.377	32.617	25.116	5.956	9.722	32.195	44.478	-3.964	16.612	32.977	27.876	-9.879	13.813	35.888	54.11	0.805	25.783	41.465	38.946	0.039	24.385	34.533	17.516	0.212	20.208	28.196	23.389	-1.801	12.259	-5.897	-0.377	-0.249	11.956	21.324	33.43	-0.755
	-4.284	21.217	13.735	42.379	0.072	24.788	22.366	29.477	3.839	15.222	27.63	28.464	-1.578	18.377	32.617	25.116	5.956	9.722	32.195	44.478	-3.964	16.612	32.977	29.713	-9.879	13.813	35.888	54.11	0.805	25.783	41.465	38.946	0.039	24.385	34.533	17.516	0.212	20.208	28.196	23.389	-1.801	12.259	-5.897	-0.377	-0.249	11.956	21.324	33.43	-0.755
	-4.284	21.217	13.735	42.379	0.072	24.788	35.784	29.477	3.839	15.222	27.63	28.464	-6.205	13.174	32.617	24.72	5.956	9.722	32.195	44.478	-3.964	16.612	32.977	29.713	-9.879	13.813	35.888	54.11	0.805	25.783	41.465	52.406	0.039	23.925	38.411	17.516	0.212	20.208	28.196	23.389	-1.801	12.259	-5.897	-0.377	-0.249	11.956	21.324	33.43	-0.755
	-4.284	21.217	13.735	42.379	0.072	24.788	35.784	29.477	3.839	15.222	27.63	28.464	-6.205	13.174	32.617	24.72	5.956	9.722	32.195	44.478	-3.964	16.612	32.977	28.663	-9.879	13.813	35.888	54.11	0.805	25.783	41.465	52.406	0.039	23.925	38.411	17.516	0.212	14.06	28.196	23.389	-1.801	12.259	-5.897	-0.377	-0.249	11.956	21.324	33.43	-0.755
	-4.284	21.217	13.735	42.379	0.072	24.788	35.784	26.875	3.839	15.222	27.63	28.464	-6.205	13.174	32.617	24.72	5.956	9.722	32.195	44.478	-3.964	16.612	32.977	28.663	-9.879	13.813	35.888	54.11	0.805	25.783	41.465	52.406	0.039	23.925	38.411	17.516	0.212	14.06	28.196	37.986	-1.801	12.259	-5.897	-0.377	-0.249	11.956	21.324	33.43	-0.755
	-4.284	21.217	13.735	42.379	0.072	24.788	35.784	26.875	3.839	15.222	27.63	28.464	-6.205	13.174	32.617	24.72	5.956	9.722	32.195	41.159	-3.964	16.612	54.433	22.574	-9.879	13.813	35.888	54.11	0.805	25.783	41.465	52.406	0.039	23.925	23.062	43.387	0.212	14.06	28.196	37.986	-1.801	12.259	-5.897	-0.377	-0.249	11.956	21.324	33.43	-0.755
	-4.284	21.217	13.735	42.379	0.072	24.788	36.132	26.875	3.839	15.222	27.63	28.464	-6.205	13.174	32.617	24.72	5.956	9.722	32.195	41.159	-3.964	16.612	54.433	22.574	-9.879	13.813	35.888	54.11	0.805	25.783	41.465	52.406	0.039	23.925	23.062	43.387	0.212	14.06	28.196	37.986	-1.801	12.259	-5.897	-0.377	-0.249	11.956	21.324	33.43	-0.755
	-4.284	21.217	13.735	26.893	0.072	24.788	36.132	26.875	3.839	15.222	27.63	42.925	-6.205	13.174	32.617	24.72	5.956	9.722	32.195	41.159	-3.964	16.612	54.433	32.949	-9.879	13.813	35.888	54.11	0.805	25.783	41.465	52.406	0.039	23.925	23.062	50.119	0.212	14.06	28.196	37.986	-1.801	12.259	-5.897	-0.377	-0.249	11.956	21.324	33.43	-0.755
	-4.284	21.217	13.735	26.893	0.072	24.788	36.132	30.426	3.839	15.222	27.63	42.925	-9.036	13.174	32.617	24.72	-0.108	9.722	32.195	36.399	-3.964	16.612	54.433	32.949	-9.879	20.741	35.888	54.11	0.805	25.783	41.465	52.406	0.039	23.925	22.259	50.119	0.212	14.06	30.652	37.986	-1.801	12.259	-5.897	-0.377	-0.249	11.956	21.324	33.43	-0.755
	-4.284	21.217	13.735	26.893	0.072	24.788	36.132	30.426	3.839	15.222	27.63	42.925	-9.036	13.174	32.617	22.756	-0.108	9.722	32.195	36.399	-3.964	16.612	54.433	32.949	-9.879	20.741	35.888	54.11	0.805	25.783	41.465	52.406	0.039	23.925	22.259	50.119	0.212	14.06	30.652	37.986	-1.801	12.259	-5.897	-0.377	-0.249	11.956	21.324	28.628	-0.755
	-4.284	21.217	13.735	26.893	0.072	24.788	36.132	30.426	3.839	15.222	18.598	42.925	-9.036	13.174	32.617	22.756	-3.813	9.722	32.195	36.399	-3.964	16.612	54.433	32.949	-9.879	20.741	35.888	54.11	0.805	25.783	41.465	52.406	0.039	23.925	22.259	44.844	0.212	14.06	30.169	37.986	-1.801	12.259	-5.897	-0.377	-0.249	11.956	21.324	28.628	-0.755
	-4.284	21.217	6.812	26.893	0.072	30.356	36.132	30.426	3.839	15.222	18.598	42.925	-9.036	13.174	32.617	22.756	-3.813	9.722	32.195	36.399	-3.964	16.612	54.433	32.949	-9.879	20.741	35.888	54.11	0.805	25.783	41.465	52.406	0.039	23.925	36.514	44.844	0.212	14.06	30.169	37.986	-1.801	12.259	-5.897	-0.377	-0.249	11.956	21.324	28.628	-0.755
	-4.284	21.217	6.812	26.893	0.072	30.356	36.132	30.426	3.839	15.222	18.598	42.925	0.502	13.174	32.617	22.756	-3.813	9.722	32.195	36.399	-3.964	16.612	54.433	32.949	-9.879	20.741	35.888	54.11	0.805	22.1	41.465	59.113	0.039	23.925	36.514	44.844	0.212	14.06	30.169	37.986	-1.801	12.259	-5.897	-0.377	-0.249	11.956	21.324	28.628	-0.755
	-4.284	21.217	6.812	26.893	0.072	30.356	36.132	30.426	3.839	15.222	18.598	30.318	0.502	13.174	25.607	27.688	-3.813	9.722	32.195	36.399	-3.964	16.612	54.172	32.949	-9.879	20.741	35.888	54.11	0.805	22.1	41.465	59.113	0.039	23.925	36.514	44.844	0.212	14.06	30.169	37.986	-1.801	12.259	-5.897	-0.377	-0.249	11.956	21.324	28.628	-0.755
	-4.284	21.217	8.743	26.893	0.072	30.356	36.132	30.426	3.839	15.222	25.316	30.318	0.502	13.174	25.607	27.688	1.845	9.722	32.195	36.399	-3.964	16.612	54.172	32.949	-9.879	20.741	35.888	54.11	0.805	13.391	41.465	59.113	0.039	23.925	36.514	44.844	0.212	22.609	23.148	37.986	-1.801	12.259	-5.897	-0.377	-0.249	11.956	21.324	28.628	-0.502
	-4.284	21.217	8.743	26.893	0.072	30.356	36.132	27.256	3.839	15.222	25.316	30.318	-0.07	13.174	25.607	27.688	1.845	9.722	32.195	36.399	-3.964	16.612	26.067	32.949	-9.879	20.741	35.888	54.11	0.805	13.391	41.465	59.113	0.039	23.925	36.514	39.222	0.212	22.609	23.148	37.986	-1.801	12.259	-5.897	-0.377	-0.249	11.956	21.324	28.628	-0.502
	-4.284	21.217	8.743	26.893	0.072	30.356	36.132	27.256	3.839	15.222	25.316	30.318	-0.07	13.174	25.607	27.688	1.845	9.722	32.195	36.399	-3.964	16.612	26.067	32.949	-9.879	20.741	35.888	59.818	0.805	13.391	41.465	59.113	0.039	13.391	36.514	39.222	-0.673	22.609	23.148	37.986	-1.801	12.259	-5.897	-0.377	-0.249	11.956	21.324	28.628	-0.502
	-4.284	21.217	8.743	26.893	0.696	30.356	36.132	27.256	3.839	15.222	25.316	30.318	-0.07	13.174	25.607	27.688	1.845	9.722	32.195	36.399	-3.964	16.612	26.067	32.949	3.776	20.741	35.888	59.818	0.805	13.391	41.465	59.113	0.039	13.391	36.514	39.222	-0.673	22.609	23.148	37.986	-1.801	12.259	-5.897	-0.377	-0.249	11.956	21.324	28.628	-0.502
	-4.284	21.217	8.743	26.893	0.696	30.356	36.132	27.256	3.839	15.222	25.316	30.318	-0.07	13.174	25.607	27.125	-3.588	9.722	32.195	44.244	-3.964	16.612	26.067	32.949	-2.961	20.741	35.888	59.818	0.805	13.391	41.465	59.113	0.039	13.391	44.133	39.222	-0.673	22.609	23.148	37.986	-0.346	12.259	-5.897	-0.377	-0.249	11.956	21.324	28.628	-0.502
	-4.284	21.217	8.743	26.893	0.696	30.356	36.132	27.256	3.839	15.222	25.316	30.318	-0.07	13.174	25.607	27.125	-3.588	9.722	32.195	44.244	-3.964	16.612	26.067	32.949	-2.961	20.741	35.888	59.818	0.805	13.391	41.465	59.113	0.039	13.391	44.133	39.222	-0.673	22.609	23.148	37.986	-0.346	12.259	-5.897	-0.377	-0.249	11.968	21.324	28.628	-0.502
	-4.284	21.217	8.743	27.922	0.696	30.356	36.132	33.836	3.839	15.222	25.316	30.318	-0.07	13.174	25.607	27.125	-3.588	9.722	32.195	44.244	-3.964	16.612	26.067	32.949	5.607	20.741	35.888	59.818	0.805	13.391	41.465	49.995	0.039	13.391	44.133	39.222	-0.673	22.609	23.148	37.986	-0.346	12.259	-5.897	-0.377	-0.249	11.968	21.324	28.628	1.813
	-4.284	21.217	8.743	27.922	0.696	30.356	36.132	33.836	3.839	15.222	25.316	30.318	-0.07	13.174	25.607	27.125	1.7	9.722	32.195	44.244	-3.964	16.612	26.067	32.949	5.607	20.741	35.888	59.818	0.805	13.391	41.465	49.995	0.039	13.391	44.133	39.222	-0.673	22.609	23.148	37.986	-0.346	12.259	-5.897	-0.377	-0.249	11.968	21.324	28.628	1.813
	-4.284	21.217	8.743	27.922	0.696	30.356	31.742	33.836	3.839	15.222	25.316	30.318	-0.07	13.174	25.607	27.125	1.7	9.722	32.195	43.388	-3.964	16.612	26.067	32.949	5.607	20.741	35.888	59.818	0.805	20.512	41.465	49.995	0.039	13.391	44.133	39.222	-0.673	22.609	23.148	37.986	-0.346	12.259	-5.897	-0.377	-0.249	11.968	21.324	28.628	1.813
	-4.284	21.217	22.541	27.922	-6.081	30.356	31.742	33.836	3.839	15.222	25.316	30.318	-0.07	13.174	25.607	27.125	1.7	9.722	32.195	43.388	-3.964	16.612	26.067	32.949	-7.251	20.741	35.888	59.818	0.805	20.512	41.465	49.995	0.039	13.391	32.587	39.222	-0.673	22.609	23.148	37.986	-0.346	12.259	-5.897	-0.377	-0.249	11.968	21.324	28.628	1.813
	-4.284	21.217	22.541	27.922	-2.771	30.356	31.742	33.836	3.839	15.222	25.316	27.292	-0.07	13.174	25.607	27.125	1.7	9.722	32.195	43.388	-3.964	16.612	26.067	32.949	-7.251	20.741	35.888	59.818	0.805	20.512	41.465	49.995	0.039	13.391	32.587	39.222	-0.673	22.609	23.148	37.986	-0.346	12.259	-5.897	-0.377	-0.249	11.968	21.324	28.628	1.813
	-4.284	21.217	22.541	38.992	-2.771	30.356	31.742	33.836	3.839	15.222	25.316	27.292	-0.07	13.174	25.607	27.125	1.7	9.722	32.195	43.388	-3.964	16.612	26.067	32.949	1.154	20.741	35.888	59.818	0.805	20.512	41.465	49.995	0.039	13.391	32.587	39.222	-0.673	22.609	23.148	37.986	-0.346	12.259	-5.897	-0.377	-0.249	11.968	21.324	28.628	1.813
	-4.284	21.217	22.541	38.992	0.438	30.356	31.742	33.836	3.839	15.222	25.316	27.292	-0.07	13.174	25.607	40.181	2.59	9.722	32.195	43.388	-3.964	16.612	26.067	32.949	1.154	20.741	35.888	59.818	0.805	20.512	41.465	49.995	0.039	13.391	32.587	39.222	-0.673	22.609	23.148	37.986	-0.346	12.259	-5.897	-0.377	-0.249	11.968	21.324	41.846	1.813
	-4.284	23.616	15.128	38.992	0.438	30.356	31.742	33.836	3.839	15.222	25.316	46.372	-0.07	13.174	25.607	40.181	2.59	9.722	32.195	43.388	-3.964	16.612	26.067	32.949	1.154	20.741	35.888	59.818	0.805	20.512	41.465	49.995	0.039	13.391	32.587	39.222	-0.673	22.609	23.148	37.986	-0.346	12.259	-5.897	-0.377	-0.249	11.968	21.324	41.846	1.813
	-4.284	23.616	15.128	38.992	0.438	30.356	31.742	33.836	3.839	15.222	25.316	46.372	-0.07	13.174	25.607	40.181	2.59	9.722	32.195	43.388	-3.964	16.612	26.067	32.949	-3.817	20.741	35.888	59.818	0.805	20.512	41.465	49.995	0.039	13.391	32.587	39.222	-0.673	22.609	23.148	37.986	-0.346	12.259	-5.897	-0.377	-0.249	11.968	21.324	41.846	1.813
	-4.284	19.714	15.128	38.992	0.438	30.356	31.742	33.836	3.839	15.222	25.316	46.372	-0.07	13.174	25.607	40.181	2.59	9.722	32.195	43.388	-3.964	16.612	26.067	32.949	-3.817	20.741	35.888	59.818	0.805	20.512	41.465	49.995	0.039	13.391	32.587	39.222	-0.673	29.34	23.148	37.986	-0.346	12.259	-5.897	-0.377	-0.249	11.968	21.324	41.846	4.095
	-4.284	19.714	15.128	38.992	0.438	30.356	31.742	33.836	3.839	15.222	25.316	35.94	-0.07	13.174	25.607	40.181	2.59	9.722	32.195	43.388	-3.964	16.612	26.067	32.949	-3.817	20.741	35.888	59.818	0.805	20.512	41.465	49.995	0.039	13.391	32.587	39.222	-0.673	29.34	23.148	37.986	-0.346	12.259	-5.897	-0.377	-0.249	11.968	21.324	41.846	4.095
	-4.284	19.714	15.128	44.545	0.438	30.356	41.352	33.836	-3.949	15.222	21.391	35.94	-0.07	13.174	25.607	40.181	0.925	9.722	32.195	43.388	-3.964	23.828	26.067	32.949	4.817	20.741	35.888	59.818	0.805	20.512	41.465	49.995	0.039	13.391	43.03	39.222	-0.673	29.34	23.148	37.986	-0.346	12.259	-5.897	-0.377	-0.249	11.968	21.324	41.846	4.095
	-4.284	19.714	15.128	44.545	0.438	30.356	41.352	33.836	-3.949	15.222	21.391	35.94	-0.07	13.174	25.607	40.181	0.925	9.722	32.195	49.833	-3.964	23.828	26.067	32.949	4.817	20.741	35.888	45.816	0.805	20.512	41.465	49.995	0.039	13.391	43.03	39.222	-0.673	29.34	23.148	37.986	-0.346	12.259	-5.897	-0.377	-0.249	5.791	21.324	41.846	4.095
	-4.284	19.714	15.128	44.545	0.438	30.356	41.352	33.836	-3.949	15.222	21.391	35.94	0.346	13.174	25.607	40.181	0.925	9.722	32.195	49.833	-3.964	23.828	26.067	32.949	4.817	20.741	35.888	45.816	0.805	20.512	41.465	49.995	0.039	13.391	43.03	39.222	-0.673	29.34	23.148	37.986	-0.346	12.259	-5.897	-0.377	-0.249	5.791	21.324	41.846	4.095
	-5.862	19.714	15.128	44.545	0.438	30.356	41.285	33.836	-3.949	15.222	21.391	35.94	0.346	13.174	25.607	40.181	0.925	9.722	32.195	49.833	-3.964	13.222	26.067	32.949	4.817	20.741	35.888	45.816	0.805	20.512	41.465	49.995	0.039	13.391	43.03	39.222	-0.673	21.702	23.148	37.986	-0.346	12.259	-5.897	-0.377	-0.249	5.791	21.324	41.846	-2.788
	-5.862	19.038	15.128	44.545	0.438	30.356	41.285	33.836	-3.949	15.222	26.273	35.94	0.346	13.174	25.607	40.181	0.925	9.722	32.195	49.833	-3.964	13.222	26.067	32.949	4.817	20.741	35.888	45.816	0.805	20.512	41.465	49.995	0.039	13.391	43.03	39.222	-0.673	21.702	23.148	37.986	-0.346	12.259	-5.897	-0.377	-0.249	5.791	21.324	41.846	-2.788
	-5.862	19.038	20.7	53.48	-0.433	30.356	41.285	33.836	-3.949	15.222	26.273	35.94	13.618	13.174	25.607	40.181	0.925	9.722	32.195	45.055	-3.964	13.222	26.067	32.949	12.542	20.741	35.888	45.816	0.805	20.512	42.783	49.995	0.039	13.391	43.03	39.222	-0.673	21.702	23.148	37.986	-0.346	12.259	-5.897	-0.377	-0.249	5.791	21.324	41.846	-2.788
	-5.862	19.038	20.7	53.48	-0.433	30.356	41.285	33.836	-3.949	15.222	26.273	35.94	13.618	13.174	25.607	38.017	0.925	9.722	32.195	45.055	-3.964	13.222	26.067	28.222	12.542	20.741	35.888	54.007	0.805	20.512	42.783	49.995	0.039	13.391	43.03	39.222	-0.673	21.702	23.148	37.986	-0.346	12.259	-5.897	-0.377	-0.249	5.791	21.324	43.438	-2.788
	-5.862	19.038	20.7	53.48	-0.433	30.356	41.285	33.836	-3.949	15.222	26.273	33.691	13.618	13.174	25.607	38.017	0.925	9.722	32.195	45.055	-3.964	13.222	33.821	28.222	-8.649	20.741	35.888	54.007	0.805	20.512	42.783	49.995	0.039	13.391	43.03	39.222	-0.673	21.702	23.148	37.986	-0.346	12.259	-5.897	-0.377	-0.249	5.791	21.324	43.438	-5.71
	-8.975	19.038	20.7	53.48	-0.433	30.356	41.285	33.836	-3.949	15.222	26.445	33.691	13.618	13.174	25.607	38.017	0.925	9.722	32.195	45.055	-3.964	13.222	33.821	28.222	-8.649	20.741	35.888	54.007	0.805	20.512	42.783	49.995	0.039	13.391	43.03	39.222	-0.673	21.702	23.148	37.986	-0.346	12.259	-5.897	-0.377	-0.249	5.791	21.324	43.438	-5.71
	-8.975	19.038	20.7	36.743	-0.433	30.356	41.285	33.836	-3.949	15.222	26.445	33.691	0.797	13.174	25.607	45.984	0.925	9.722	32.195	45.055	-3.964	13.222	33.821	28.222	-8.649	20.741	35.888	54.007	0.805	11.596	42.783	49.995	0.039	13.391	43.03	39.222	-0.673	21.702	23.148	37.986	-0.346	12.259	-5.897	-0.377	-0.249	5.791	21.324	43.438	-5.71
	-8.975	18.054	20.7	36.743	0.835	30.356	41.285	33.836	-3.949	15.222	26.445	33.691	0.797	13.174	25.607	45.984	0.925	9.722	32.195	45.055	-3.964	13.222	33.984	28.222	-8.649	20.741	35.888	54.007	0.805	11.596	42.783	49.995	0.039	13.391	43.03	39.222	-0.673	21.702	23.148	37.986	-0.346	12.259	-5.897	-0.377	-0.249	5.791	21.324	43.438	-5.71
	-8.975	18.054	20.7	36.743	0.835	30.356	41.285	33.836	-3.949	15.222	26.445	33.691	0.797	13.174	25.607	45.984	0.925	9.722	32.195	45.055	-3.964	13.222	33.984	28.222	-8.649	20.741	35.888	54.007	0.805	11.596	42.783	49.995	0.039	13.391	35.601	39.222	-0.673	21.702	23.148	37.986	-0.346	12.259	-5.897	-0.377	-0.249	5.791	21.324	43.001	-5.71
	4.855	18.054	20.7	36.743	0.835	30.356	41.285	33.836	-3.949	15.222	26.445	28.215	0.797	13.174	25.607	45.984	0.925	9.722	32.195	45.055	-3.964	13.222	33.984	26.048	-8.649	20.741	35.888	54.007	0.805	11.596	42.783	49.995	0.039	13.391	35.601	39.222	-0.673	21.702	23.148	37.986	-0.346	12.259	-5.897	-0.377	-0.249	5.791	21.324	43.001	7.217
	4.855	18.054	20.7	36.743	0.835	30.356	41.285	33.836	-3.949	15.222	26.445	28.215	0.797	13.174	25.607	45.984	0.925	9.722	32.195	45.055	-3.964	13.222	33.984	26.048	6.732	20.741	35.888	54.007	-16.484	11.596	42.783	49.995	0.039	13.391	35.601	39.222	-0.673	21.702	23.148	37.986	-0.346	12.259	-5.897	-0.377	-0.249	5.791	21.324	43.001	7.217
	4.855	18.054	19.749	36.743	1.992	30.356	41.285	33.836	-3.949	15.222	26.445	28.215	0.797	13.174	25.607	60.841	0.925	9.722	32.195	45.055	-3.964	13.222	31.315	26.048	6.732	20.741	35.888	54.007	-16.484	26.842	42.783	49.995	0.039	13.391	35.601	39.222	-0.673	21.702	23.148	37.986	-0.346	12.259	-5.897	-0.377	-0.249	5.791	21.324	43.001	7.217
	4.855	18.054	19.749	36.743	1.992	30.356	42.506	33.836	-3.949	15.222	26.445	28.215	0.797	13.174	25.607	60.841	0.925	9.722	32.195	45.055	-3.964	13.222	31.315	24.972	3.687	20.741	35.888	54.007	-16.484	26.842	42.783	49.995	0.039	13.391	35.601	39.222	-0.673	21.702	23.148	37.986	-0.346	12.259	-5.897	-0.377	-0.249	5.791	21.324	43.001	7.217
	4.855	18.054	19.749	36.743	1.992	30.356	42.506	33.836	-3.949	15.222	26.445	28.215	0.797	13.174	25.607	60.841	0.925	9.722	32.195	45.055	-3.964	13.222	31.315	24.972	3.687	20.741	35.888	54.007	-16.484	26.842	42.783	49.995	0.039	13.391	35.601	39.222	-0.673	21.702	23.148	37.986	-0.346	12.259	-5.897	-0.377	-0.249	5.791	21.324	43.001	7.422
	4.855	18.054	19.749	36.743	-1.139	30.356	6.444	33.836	-3.949	15.222	26.445	28.215	0.797	13.174	25.607	60.841	0.925	9.722	32.195	43.899	-3.964	13.222	31.315	24.972	-6.313	20.741	35.888	54.007	-16.484	26.842	42.783	49.995	0.039	13.391	36.21	39.222	-0.673	21.702	23.148	37.986	-0.346	12.259	-5.897	-0.377	-0.249	5.791	21.324	43.001	7.422
	-4.297	9.934	19.749	36.743	-1.139	30.356	6.444	33.836	-0.67	15.222	26.445	28.215	0.797	13.174	25.607	40.821	0.925	9.722	32.195	43.899	-3.964	13.222	31.315	24.972	-6.313	20.741	35.888	35.796	6.316	26.842	42.783	49.995	0.039	13.391	36.21	39.222	-0.673	21.702	23.148	37.986	-0.346	12.259	-5.897	-0.377	-0.249	16.822	21.324	43.001	7.422
	-4.297	9.934	19.749	36.743	-1.139	30.356	6.444	33.836	-0.67	15.222	26.445	28.215	0.797	13.174	25.607	40.821	0.925	9.722	32.195	44.395	-3.964	13.222	31.315	24.972	-6.313	20.741	35.888	35.796	6.316	26.842	42.783	49.995	0.039	13.391	36.21	39.222	-0.673	21.702	23.148	37.986	-0.346	12.259	-5.897	-0.377	-0.249	16.822	21.324	22.845	7.422
	-4.297	9.934	19.749	36.743	-1.139	30.356	6.444	33.836	-0.67	15.222	26.445	48.364	0.797	13.174	25.607	51.486	0.925	9.722	32.195	44.395	-3.964	13.222	31.315	24.972	-6.313	20.741	35.888	35.796	5.431	26.842	42.783	49.995	0.039	13.391	36.21	39.222	-0.673	21.702	23.148	37.986	-0.346	12.259	-5.897	-0.377	-0.249	16.822	21.324	22.845	2.1
	4.897	9.934	19.749	36.743	-1.139	30.356	6.444	33.836	-0.67	15.222	26.445	48.364	4.312	13.174	25.607	51.486	0.925	9.722	32.195	47.709	-3.964	13.222	-2.311	24.972	4.477	20.741	37.179	35.796	5.431	26.842	42.783	49.995	0.039	13.391	36.21	39.222	-0.673	21.702	23.148	37.986	-0.346	12.259	-5.897	-0.377	-0.249	16.822	21.324	22.845	2.1
	4.897	9.934	10.979	36.743	-1.139	30.356	6.444	33.836	-0.67	15.222	26.445	34.214	4.312	14.987	25.607	51.486	-4.703	9.722	32.195	47.709	-3.964	13.222	-2.311	24.972	4.477	20.741	37.179	35.796	5.431	26.842	42.783	49.995	0.039	13.391	36.21	39.222	-0.673	21.702	23.148	44.147	-0.346	12.259	-5.897	-0.377	-0.249	16.822	21.324	22.845	2.1
	4.897	15.126	10.979	36.743	-1.139	30.356	6.444	33.836	-0.67	15.222	26.445	34.214	4.312	14.987	25.607	72.809	-4.703	9.722	32.195	47.709	-3.964	13.222	15.892	24.972	2.074	20.741	37.179	35.796	5.431	26.842	42.783	49.995	0.039	13.391	36.21	39.222	-0.673	21.702	23.148	44.147	-0.346	12.259	-5.897	-0.377	-0.249	16.822	21.324	35.565	2.1
	4.897	15.126	11.794	36.743	-3.924	30.356	6.444	33.836	-0.67	15.222	26.445	34.214	4.312	14.987	25.607	72.809	-4.703	9.722	32.195	65.869	-3.964	13.222	15.892	24.972	2.074	20.741	37.179	35.796	5.431	26.842	42.783	49.995	0.039	13.391	36.21	39.222	-0.673	21.702	23.148	44.147	-0.346	12.259	-5.897	-0.377	-0.249	16.822	21.324	35.565	2.1
	4.897	15.126	11.794	36.452	-3.924	30.356	6.444	33.836	-0.571	15.222	26.445	34.214	4.312	14.987	25.607	72.809	-4.703	9.722	32.195	65.869	-3.964	13.222	15.892	24.972	2.074	20.741	37.179	29.844	5.431	26.842	42.783	49.995	0.039	13.391	36.21	39.222	-0.673	21.702	23.148	44.147	-0.346	12.259	-5.897	-0.377	-0.249	16.822	21.324	35.565	2.1
	4.897	15.126	11.794	36.452	-3.924	30.356	6.444	33.836	-0.571	15.222	26.445	34.214	2.994	14.987	25.607	72.809	-4.703	9.722	32.195	65.869	-3.964	13.222	15.892	24.972	2.074	20.741	37.179	29.844	5.431	26.842	42.783	49.995	0.039	13.391	36.21	39.222	-0.673	21.702	23.148	44.147	-0.346	12.259	-5.897	-0.377	-0.249	16.822	21.324	52.699	2.1
	4.897	15.126	11.794	36.957	-3.924	30.356	6.444	33.084	-0.571	14.216	26.445	34.214	2.994	14.987	25.607	72.809	-4.703	9.722	32.195	65.869	-3.964	13.222	15.892	24.972	2.074	20.741	37.179	29.844	5.431	26.842	42.783	49.995	0.039	13.391	36.21	39.222	-0.673	21.702	23.148	44.147	-0.346	12.259	-5.897	-0.377	-0.249	16.822	21.324	52.699	2.1
	4.897	15.126	20.447	36.957	-3.924	30.356	6.444	33.084	-0.571	14.216	26.445	34.214	2.994	14.987	25.607	72.809	-4.703	9.722	32.195	65.869	-3.964	13.222	15.892	24.972	2.074	20.741	37.179	29.844	-1.094	26.842	42.783	49.995	0.039	13.391	36.21	39.222	-0.673	21.702	23.148	44.147	-0.346	12.259	-5.897	-0.377	-0.249	16.822	21.324	52.699	-12.098
	4.897	15.126	20.447	36.957	-3.924	30.356	6.444	33.084	-0.571	14.216	26.445	34.214	2.994	14.987	25.607	30.681	-4.703	9.722	32.195	65.869	-3.964	13.222	15.892	24.972	-1.198	32.04	37.179	29.844	-1.094	25.152	42.783	49.995	0.039	13.391	36.21	39.222	-0.673	21.702	23.148	44.147	-0.346	12.259	-5.897	-0.377	-0.249	16.822	21.324	52.699	-12.098
	4.897	15.126	18.28	36.957	-3.924	30.356	6.444	33.084	-3.122	14.216	23.558	34.214	2.994	14.987	25.607	30.681	-4.703	9.722	32.195	65.869	-3.964	13.222	15.892	24.972	-1.198	32.04	37.179	29.844	-1.094	25.152	42.783	49.995	0.039	13.391	36.21	39.222	-0.673	21.702	23.148	44.147	-0.346	12.259	-5.897	-0.377	-0.249	16.822	21.324	52.699	-12.098
	4.897	15.126	18.28	36.957	-3.924	30.356	6.444	33.084	-3.122	14.216	23.558	34.214	2.994	14.987	25.607	30.681	-4.703	9.722	32.195	65.869	-3.964	13.222	15.892	24.972	-1.198	32.04	37.179	29.844	-1.094	25.152	43.122	49.995	0.039	13.391	36.21	39.222	-0.673	21.702	23.148	44.147	-0.346	12.259	-5.897	-0.377	-0.249	16.822	21.324	52.699	-12.098
	4.897	15.126	19.612	36.957	-3.924	30.356	6.444	32.707	-3.122	14.216	23.558	34.214	2.994	14.987	25.607	30.681	-5.923	9.722	32.195	65.869	-3.964	13.222	15.892	24.972	0.384	32.04	37.179	29.844	-1.094	25.152	43.122	49.995	0.039	13.391	36.21	39.222	-0.673	21.702	23.148	44.147	-0.346	12.259	-5.897	-0.377	-0.249	16.822	21.324	52.699	-12.098
	4.897	15.126	19.612	36.957	-3.924	30.356	6.444	32.707	-3.122	14.216	23.558	34.214	2.994	14.987	25.607	37.382	-5.923	9.722	32.195	65.869	-3.964	13.222	20.826	24.972	0.384	32.04	37.179	29.844	-1.094	25.152	43.122	49.995	0.039	13.391	36.21	39.222	-0.673	21.702	23.148	44.147	-0.346	12.259	-5.897	-0.377	-0.249	16.822	21.324	56.52	-12.098
	4.897	15.126	19.612	36.957	-3.276	30.356	6.444	32.707	-3.122	14.216	23.558	34.214	2.994	14.987	25.607	37.382	-5.923	9.722	32.195	65.869	-3.964	13.222	20.826	24.972	0.384	32.04	37.179	29.844	-1.094	25.152	43.122	49.995	0.039	13.391	36.21	39.222	-0.673	21.702	23.148	44.147	-0.346	12.259	-5.897	-0.377	-0.249	16.822	21.324	56.52	2.139
	4.897	15.126	19.612	36.957	-3.276	30.356	6.444	32.707	-3.122	14.216	23.558	34.214	-0.168	14.987	25.607	37.382	-5.923	9.722	32.195	65.869	0.331	13.222	20.826	24.972	0.384	32.04	37.179	29.844	-1.094	25.152	43.122	49.995	0.039	13.391	36.21	39.222	-0.673	21.702	23.148	44.147	-0.346	12.259	-5.897	-0.377	-0.249	16.822	21.324	56.52	2.139
	4.897	15.126	19.612	36.957	-3.276	30.356	6.444	32.707	-3.122	14.216	23.558	34.214	-0.168	14.987	25.607	37.382	-5.923	9.722	32.195	65.869	0.331	13.222	20.826	24.972	0.384	16.454	37.179	29.844	-1.094	25.152	43.122	49.995	0.039	13.391	36.21	39.222	-0.673	21.702	23.148	44.147	-0.346	12.259	-5.897	-0.377	-0.249	16.822	21.324	56.52	2.139
	4.897	15.126	19.612	36.957	-3.276	30.356	6.444	32.707	-3.122	14.216	23.558	34.214	-0.168	14.987	25.607	37.382	-5.923	9.722	32.195	65.869	0.331	13.222	23.644	24.972	0.384	16.454	37.179	29.844	-1.094	25.152	43.122	49.995	0.039	13.391	36.21	39.222	-0.673	21.702	23.148	44.147	-0.346	12.259	-5.897	-0.377	-0.249	16.822	21.324	56.52	2.139
	4.897	15.126	37.236	36.957	-3.276	30.356	6.444	32.707	-3.122	14.216	23.558	34.214	-0.168	14.987	25.607	37.382	-5.923	9.722	32.195	65.869	0.331	20.49	23.644	24.972	0.384	16.454	37.179	29.844	-1.094	25.152	43.122	49.995	0.039	13.391	36.21	39.222	-0.673	21.702	23.148	44.147	5.895	12.259	-5.897	-0.377	-0.249	16.822	21.324	56.52	2.139
	4.897	15.126	37.236	42.519	-3.935	30.356	6.444	49.181	-3.122	14.216	23.558	34.214	-3.686	14.987	25.607	37.382	-5.923	9.722	32.195	42.215	0.331	20.49	23.644	20.363	0.384	16.454	37.179	29.844	-1.094	25.152	43.122	49.995	0.039	13.391	36.21	39.222	-0.673	21.702	23.148	44.147	5.895	12.259	-5.897	-0.377	-0.249	16.822	21.324	56.52	2.139
	4.897	15.126	37.236	42.519	-3.935	30.356	6.444	49.181	4.456	14.216	26.944	34.214	-3.686	14.987	25.607	37.382	-7.646	9.722	32.195	42.215	0.331	20.49	14.867	20.363	0.384	16.454	37.179	29.844	-1.094	25.152	43.122	49.995	0.039	13.391	36.21	39.222	-0.673	21.702	23.148	44.147	5.895	12.259	-5.897	-0.377	-0.249	16.822	21.324	31.668	-0.076
	4.897	15.126	37.236	42.519	-4.659	30.356	6.444	49.181	4.456	14.216	26.944	34.214	-3.686	14.987	25.607	37.382	-7.646	9.722	32.195	42.215	0.331	20.49	14.867	37.894	0.384	16.454	31.66	29.844	-1.094	25.152	43.122	49.995	0.039	13.391	36.21	39.222	-0.673	21.702	23.148	44.147	2.012	12.259	-5.897	-0.377	-0.249	16.822	21.324	31.668	-0.076
	4.897	15.126	37.236	42.519	-4.659	30.356	-0.854	49.181	4.456	14.216	26.944	34.214	1.015	14.987	25.607	37.382	0.713	9.722	32.195	42.215	0.331	20.49	14.867	37.894	0.384	9.001	31.66	29.844	-1.094	25.152	43.122	49.995	0.039	13.391	36.21	39.222	-0.673	21.702	23.148	44.147	2.012	12.259	-5.897	-0.377	-0.249	16.822	21.324	31.668	-0.076
	-1.479	15.126	37.236	42.519	-4.659	30.356	-0.854	49.181	-6.879	14.216	26.944	34.214	1.015	14.987	25.607	37.382	0.713	9.722	32.195	42.215	0.331	20.49	9.407	37.894	0.384	9.001	31.66	29.844	-1.094	25.152	43.122	49.995	0.039	13.391	36.21	39.222	-0.673	21.702	23.148	44.147	2.012	12.259	-5.897	-0.377	-0.249	16.822	21.324	31.668	-0.076
	-0.156	15.126	37.236	38.281	-4.659	30.356	-0.854	49.181	-6.879	14.216	26.944	34.214	1.015	14.987	25.607	37.382	0.713	9.722	32.195	42.215	0.331	17.275	9.407	38.044	0.384	9.001	31.66	29.844	-1.094	25.152	43.122	49.995	0.039	13.391	36.21	39.222	-0.673	21.702	23.148	44.147	2.012	12.259	-5.897	-0.377	-0.249	16.822	21.324	31.668	-0.076
	-0.156	15.126	37.236	38.281	-4.659	30.356	-0.854	20.824	-6.879	14.216	26.944	34.214	1.015	14.987	25.607	37.382	0.713	9.722	32.195	52.423	0.331	17.275	10.182	38.044	0.384	9.001	30.32	29.844	-1.094	25.152	43.122	49.995	0.039	13.391	36.21	39.222	-0.673	21.702	23.148	44.147	2.012	12.259	-5.897	-0.377	-0.249	16.822	21.324	31.668	-0.076
	-0.156	15.126	37.236	38.281	-4.659	30.356	-0.854	20.824	1.528	14.216	26.944	34.214	1.015	14.987	25.607	37.382	0.713	9.722	32.195	52.423	0.331	17.275	10.182	38.044	0.384	9.001	30.32	29.844	-1.094	25.152	43.122	49.995	0.039	13.391	36.21	39.222	-0.673	21.702	23.148	44.147	2.012	12.259	-5.897	-0.377	-0.249	16.822	21.324	31.668	-0.076
	-0.156	15.126	37.236	38.281	-4.659	30.356	-0.854	20.824	1.528	14.216	26.944	34.214	1.015	14.987	25.607	37.382	0.713	9.722	32.195	52.423	0.331	17.275	10.182	38.044	0.384	9.001	30.32	29.844	-1.094	25.152	43.122	49.995	0.039	13.391	36.21	39.222	-0.673	21.702	23.148	44.147	2.012	12.259	-5.897	-0.377	-0.249	16.822	21.324	31.668	-0.076
	-0.156	15.126	37.236	38.281	0.749	30.356	-0.854	20.824	1.528	14.216	26.944	34.214	1.015	14.987	25.607	37.382	0.713	9.722	32.195	52.423	0.331	17.275	18.965	37.866	0.384	9.001	22.038	29.844	-1.094	25.152	43.122	49.995	0.039	13.391	36.21	39.222	-0.673	21.702	23.148	44.147	2.012	12.259	-5.897	-0.377	-0.249	16.822	21.324	31.668	-0.076
	-0.156	15.126	29.539	38.281	0.749	30.356	-0.854	20.824	1.528	14.216	22.218	34.214	1.015	14.987	25.607	37.382	0.713	9.722	32.195	52.423	0.331	17.275	18.965	37.866	0.384	9.001	22.038	29.844	-1.094	25.152	43.122	49.995	0.039	13.391	36.21	39.222	-0.673	21.702	23.148	44.147	2.012	12.259	-5.897	-0.377	-0.249	16.822	21.324	31.668	-0.076
	-0.156	15.126	29.539	38.281	0.749	30.356	-0.854	20.824	1.528	14.216	22.218	34.214	1.015	14.987	25.607	37.382	0.713	9.722	32.195	52.423	0.331	17.275	18.965	37.866	0.384	9.001	25.241	29.844	-1.094	25.152	43.122	49.995	0.039	13.391	36.21	39.222	-0.673	21.702	23.148	44.147	2.012	12.259	-5.897	-0.377	-0.249	16.822	21.324	31.668	-0.076
	-0.156	15.126	29.539	38.281	0.749	30.356	-0.854	20.824	1.528	14.216	22.218	34.214	1.015	14.987	25.607	37.382	0.713	9.722	32.195	52.423	0.331	17.275	18.965	37.866	0.384	9.001	25.241	29.844	-1.094	25.152	43.122	49.995	0.039	13.391	36.21	39.222	-0.673	21.702	23.148	44.147	-10.772	12.259	-5.957	-0.377	-0.249	16.822	21.324	31.668	-0.076
	0.351	15.126	29.539	38.281	0.749	30.356	-0.854	39.031	1.528	14.216	22.218	34.214	1.015	14.987	25.607	37.382	0.713	9.722	32.195	52.423	0.331	17.275	18.965	37.866	0.384	9.001	25.241	29.844	-1.094	25.152	43.122	49.995	0.039	13.391	36.21	39.222	-0.673	21.702	23.148	44.147	-10.772	12.259	-5.957	-0.377	-0.249	16.822	21.324	31.668	-0.076
	0.351	15.126	29.539	51.235	0.749	30.356	-0.854	39.031	1.528	14.216	22.218	34.214	1.015	14.987	25.607	37.382	0.713	9.722	32.195	52.423	0.331	24.75	18.965	37.866	0.384	9.001	25.241	29.844	-1.094	25.152	43.122	49.995	0.039	13.391	36.21	39.222	-0.673	21.702	23.148	44.147	3.018	12.259	-5.957	-0.377	-0.249	16.822	21.324	31.668	-0.063
	0.362	15.126	22.943	51.235	0.749	30.356	-0.854	39.031	1.528	14.216	22.218	34.214	1.015	14.987	25.607	37.382	0.713	9.722	32.195	52.423	0.331	24.75	18.965	35.488	0.384	9.001	25.241	29.844	-1.094	25.152	43.122	49.995	0.039	13.391	36.21	39.222	-0.673	21.702	23.148	44.147	3.018	12.259	-5.957	-0.377	-0.249	16.822	21.324	31.668	-0.063
	0.362	15.126	22.943	37.952	0.749	30.356	-0.854	39.031	1.528	14.216	22.218	34.214	1.015	14.987	25.607	37.382	0.713	9.722	32.195	52.423	0.331	24.75	18.965	35.488	0.384	9.001	25.241	29.844	-1.094	25.212	43.122	49.995	0.039	13.391	36.21	39.222	-0.673	21.702	23.148	44.147	3.018	12.259	-5.957	-0.377	-0.249	16.822	21.324	31.668	-0.049
	-2.567	15.126	45.524	37.952	0.749	30.356	-0.854	39.031	1.528	14.216	27.101	34.214	1.015	14.987	25.607	37.382	0.713	9.722	32.195	52.423	0.331	24.75	18.965	35.488	0.384	9.001	25.241	29.844	-1.094	25.212	43.122	49.995	0.039	13.391	36.21	39.222	-0.673	21.702	23.148	44.577	-6.593	12.259	-5.957	-0.377	-0.249	16.822	21.324	31.668	-0.049
	-2.567	15.126	45.524	37.952	0.749	30.356	-0.854	39.031	1.528	14.216	27.101	34.214	1.015	14.987	25.607	37.382	0.713	9.722	32.195	52.423	0.331	24.75	18.965	35.488	0.384	9.001	25.241	29.844	-1.094	25.212	43.122	49.995	0.039	19.388	36.21	39.222	-0.673	21.702	23.148	44.577	-6.593	12.259	-5.957	-0.377	-0.249	16.822	21.324	31.668	-0.049
	-2.567	15.126	33.175	37.952	0.749	30.356	-0.854	39.031	1.528	14.216	27.101	34.214	1.015	14.987	25.607	37.382	0.713	9.722	32.195	52.423	0.331	24.75	18.965	35.488	0.384	9.001	25.241	29.844	-1.094	25.212	43.122	49.995	0.039	19.388	36.21	39.222	-0.673	21.702	23.148	44.577	-6.593	12.259	-5.957	-0.377	-0.249	16.822	21.324	31.668	-0.049
	-2.567	15.126	33.175	37.952	0.749	30.356	-0.854	39.031	1.528	14.216	27.101	34.214	1.015	14.987	25.607	37.382	0.713	9.722	32.195	52.423	0.331	24.75	18.965	35.488	0.384	9.001	25.241	29.844	-1.094	25.212	43.122	49.995	0.039	19.388	36.21	39.222	-0.673	21.702	23.148	44.577	-6.593	12.259	-5.957	-0.377	-0.249	16.822	21.324	31.668	-0.075
	-2.567	15.126	33.175	37.952	0.749	30.356	-0.854	39.031	-7.161	14.216	27.101	33.533	1.015	14.987	25.607	37.382	0.713	9.722	32.195	52.423	0.331	24.75	18.965	46.925	0.384	9.001	20.367	29.844	0.065	25.212	43.122	49.995	0.039	19.539	36.21	39.222	-0.673	21.702	23.148	44.577	-6.593	12.259	-5.957	-0.377	-0.249	16.822	21.324	31.668	-0.075
	-2.567	15.126	33.175	37.952	0.749	30.356	-0.854	39.031	-7.161	14.216	27.101	33.533	1.015	14.987	25.607	37.382	0.713	9.722	32.195	52.423	0.331	24.75	18.965	46.925	0.444	9.001	20.367	29.844	0.065	25.212	43.107	49.995	0.039	19.539	36.21	39.222	-0.673	21.702	23.148	44.577	-6.593	12.259	-5.957	-0.377	-0.249	16.822	21.324	31.668	-0.075
	-2.567	15.126	33.175	37.952	0.749	30.356	-0.854	39.031	3.104	14.216	27.101	33.533	1.015	14.987	25.607	37.382	0.713	9.722	32.195	52.423	0.331	24.75	18.965	46.925	0.444	9.001	20.367	29.844	0.326	25.212	43.107	49.995	0.039	19.671	36.21	39.222	-0.673	21.702	23.148	44.577	-6.593	12.259	-5.957	-0.377	-0.249	16.822	21.324	31.668	0.072
	-2.567	15.126	33.175	37.952	0.749	30.356	-0.854	39.031	3.104	14.216	27.101	33.533	1.015	14.987	25.607	37.382	-6.052	9.722	32.195	52.423	0.331	24.75	18.965	46.925	0.444	9.001	20.367	29.844	0.326	25.212	43.107	49.995	0.039	19.671	36.21	39.222	-0.673	21.702	23.148	44.577	-6.593	12.259	-5.957	-0.377	-0.249	14.338	21.324	31.668	0.072
	-2.567	15.126	2.731	37.952	0.749	30.356	-0.854	39.031	3.104	14.216	27.101	33.533	1.015	14.987	25.607	37.382	-6.052	9.722	32.195	52.423	0.331	24.75	18.965	46.925	0.444	9.001	20.367	29.844	0.326	25.212	41.353	49.995	0.039	19.671	36.21	39.222	-0.673	21.702	23.148	44.577	-6.593	12.259	-5.957	-0.377	-0.249	14.338	21.324	31.668	0.072
	-2.567	15.126	2.731	55.063	0.749	30.356	-0.854	39.031	3.104	14.216	27.101	33.533	1.015	14.987	25.607	37.382	-6.052	9.722	32.195	44.506	0.331	24.75	18.965	46.925	0.444	9.001	20.367	29.557	0.933	25.212	41.353	49.995	0.039	19.671	36.21	39.222	-0.673	21.702	23.148	44.917	-6.593	12.259	-5.957	-0.377	-0.249	14.338	21.324	31.668	0.072
	-2.567	15.126	2.731	55.063	0.749	30.356	-0.854	39.031	3.104	14.216	27.101	33.533	1.015	14.987	25.607	37.382	-6.052	9.722	32.195	44.506	0.331	24.75	18.965	46.925	0.444	9.001	20.367	29.557	0.933	25.212	41.353	49.995	0.039	19.671	36.21	39.222	-0.673	21.702	23.148	44.917	7.215	12.259	-5.957	-0.377	-0.249	14.338	21.324	31.668	0.072
	-2.567	15.126	2.731	55.063	0.749	30.356	-0.854	39.031	-3.104	14.216	27.101	33.533	1.015	14.987	25.607	37.382	-6.052	9.722	32.195	44.506	-4.616	24.75	18.965	46.925	0.444	9.001	20.367	29.557	0.933	25.212	41.353	49.995	0.039	19.671	36.21	39.222	-0.673	21.702	23.148	44.917	7.215	12.259	-5.957	-0.377	-0.249	14.338	21.324	31.668	0.072
	-2.567	15.126	2.731	55.063	0.749	30.356	-0.854	39.031	-3.104	14.216	27.101	33.533	1.015	14.987	25.607	37.382	-6.052	9.722	32.195	44.506	-4.616	24.75	18.965	46.925	0.444	9.001	17.76	29.557	0.933	25.212	41.353	49.995	0.039	19.671	36.21	39.222	-0.673	21.702	23.148	44.917	7.215	12.259	-5.957	-0.377	-0.249	14.338	21.324	31.668	0.072
	2.209	15.126	2.731	55.063	0.749	30.356	-0.854	39.031	-3.104	14.216	27.101	33.533	1.015	14.987	25.607	37.382	-4.439	9.722	32.195	44.506	-4.616	24.75	18.965	46.925	0.444	9.001	17.76	29.557	0.933	25.212	41.353	49.995	0.039	19.671	36.21	39.222	-0.673	21.702	23.148	44.917	7.215	12.259	-5.957	-0.377	-0.249	14.338	21.324	31.668	0.072
	2.209	15.126	2.731	55.063	0.749	30.356	-0.854	39.031	-3.104	14.216	27.101	33.533	1.015	14.987	25.607	37.382	-4.439	9.722	32.195	44.506	1.106	24.75	18.965	46.925	0.444	9.001	17.76	26.588	0.933	25.212	41.353	49.995	0.039	19.671	36.21	39.222	-0.673	21.702	23.148	44.917	7.215	12.259	-5.957	-0.377	-0.249	14.338	21.324	31.668	0.072
	2.209	15.126	2.731	45.665	0.749	30.356	-0.854	39.031	-3.104	14.533	27.101	33.138	1.015	14.987	25.607	37.382	-4.439	9.722	32.195	44.506	1.106	24.75	18.965	46.925	0.444	9.001	17.76	26.588	0.933	25.212	41.353	49.995	0.039	19.671	36.21	39.222	-0.673	21.702	23.148	44.917	7.215	12.259	-5.957	-0.377	-0.249	14.338	21.324	31.668	0.072
	2.209	15.126	2.731	45.665	0.749	30.356	-0.854	39.031	-14.742	14.533	27.101	33.138	1.015	14.987	25.607	37.382	1.745	9.722	32.195	44.506	1.106	24.75	18.965	46.925	0.444	9.001	17.76	26.588	0.933	25.212	41.353	49.995	0.039	19.671	36.21	39.222	-0.673	21.702	23.148	44.917	7.215	12.259	-5.957	-0.377	-0.249	14.338	21.324	31.668	0.072
	2.209	15.126	2.731	52.205	0.749	30.356	-0.854	39.031	-14.742	14.533	27.101	33.138	1.015	14.987	25.607	37.382	1.745	9.722	32.195	44.506	2.098	24.721	18.965	46.925	0.444	9.001	17.76	26.588	0.933	25.212	41.353	49.995	0.039	19.671	36.21	39.222	-0.673	21.702	23.148	44.917	7.215	12.259	-5.597	-0.377	-0.249	14.338	21.324	31.668	0.072
	2.209	15.126	2.731	52.205	0.749	30.356	-0.854	30.014	1.317	14.533	27.101	33.138	1.015	14.987	25.607	37.382	1.745	9.722	32.195	44.506	2.098	24.721	18.965	46.925	0.444	9.001	17.76	26.588	0.933	25.212	41.353	49.995	0.039	24.564	36.21	39.222	-0.673	21.702	23.148	44.917	7.215	12.259	-5.597	-0.377	-0.249	14.338	21.324	31.668	0.072
	2.209	15.126	2.731	38.469	0.749	30.356	-0.854	30.014	1.317	14.533	27.101	45.082	1.015	14.987	25.607	37.382	1.745	9.722	32.195	44.506	2.098	24.721	18.965	46.925	0.444	9.001	17.76	26.588	5.243	25.212	41.353	49.995	0.039	24.564	36.21	39.222	-0.673	21.702	23.148	44.917	7.215	12.259	-5.597	-0.377	-0.249	14.338	21.324	31.668	0.072
	3.022	15.126	2.731	38.469	0.749	30.356	-0.854	55.062	1.317	14.533	27.101	45.082	1.015	14.987	25.607	37.382	1.745	9.722	32.195	44.506	2.098	24.721	18.965	46.925	0.444	9.001	17.76	42.617	5.243	25.212	41.353	49.995	0.039	33.335	36.21	39.222	-0.673	21.702	23.148	44.917	-5.599	12.259	-5.597	-0.377	-0.249	14.338	21.324	31.668	0.072
	3.022	15.126	2.731	38.469	0.749	30.356	-0.854	55.062	1.317	14.533	27.101	32.544	-8.109	14.987	25.607	37.382	1.745	9.722	32.195	44.506	2.098	24.721	18.965	46.925	0.444	9.001	17.76	42.617	5.243	25.212	41.353	49.995	0.039	33.335	36.21	39.222	-0.673	21.702	23.148	44.917	-5.599	12.259	-5.597	-0.377	-0.249	14.338	21.324	31.668	0.072
	3.022	15.126	2.731	38.469	0.749	30.356	-0.854	55.062	1.317	14.533	27.101	32.544	-8.109	14.987	25.607	37.382	1.745	9.722	32.195	44.506	2.098	24.721	18.965	46.925	0.444	9.001	17.76	29.81	5.243	25.212	41.353	49.995	0.039	33.335	36.21	39.222	-0.673	21.702	23.148	44.917	-5.599	12.259	2.598	-0.377	-0.249	14.338	21.324	31.678	0.072
	3.022	15.126	2.731	38.469	0.749	30.356	-0.854	55.062	9.924	14.533	27.101	32.544	-8.109	14.987	25.607	37.382	1.745	9.722	32.195	44.506	2.098	24.721	18.965	46.925	0.444	9.001	17.76	29.81	5.243	25.212	41.353	49.995	0.039	8.255	36.21	39.222	-0.673	21.702	23.148	44.917	0.761	12.259	2.598	-0.292	-0.249	14.338	21.324	31.678	0.072
	3.022	15.126	2.731	38.469	0.749	30.356	-0.854	55.062	9.924	14.533	27.101	32.544	-8.109	14.987	25.607	37.382	1.745	9.722	32.195	44.506	-6.832	24.721	18.965	46.925	0.444	9.001	17.76	53.364	5.243	25.212	41.353	49.995	0.039	8.255	36.21	35.195	-0.673	21.702	23.148	44.917	0.761	12.259	2.598	-0.292	-0.249	14.338	20.738	31.678	0.072
	3.022	15.126	2.731	38.469	2.683	30.356	-0.854	55.062	9.924	14.533	27.101	26.327	-17.672	14.987	28.225	37.382	1.745	9.722	32.195	44.506	-6.832	24.721	18.965	46.925	0.444	9.001	17.76	53.364	5.243	25.212	41.353	49.995	0.039	8.255	36.21	35.195	-0.673	21.702	23.148	44.917	0.761	12.259	2.598	-0.292	-0.249	14.338	20.738	31.678	0.072
	3.022	15.126	2.731	38.469	2.683	30.356	-0.854	55.062	9.924	14.533	27.101	26.327	-17.672	14.987	28.225	37.382	1.745	9.722	32.195	44.506	-3.83	24.721	18.965	46.925	0.444	9.001	17.76	36.159	5.243	25.212	41.353	49.995	0.039	8.255	36.21	35.195	-0.673	21.702	23.148	44.917	0.761	12.259	2.598	-0.292	-0.249	14.338	20.738	31.678	0.072
	3.022	15.126	2.731	38.469	2.683	30.356	-0.854	55.062	9.924	14.533	27.101	26.327	-17.672	14.987	28.225	37.382	1.745	9.722	32.195	44.506	-3.83	24.721	18.965	46.925	1.539	9.001	17.76	36.159	2.034	25.212	41.353	49.995	0.039	8.255	36.21	35.195	-0.673	21.702	23.148	44.917	0.761	12.259	2.598	-0.292	14.769	14.338	20.738	31.678	-0.089
	3.022	15.126	2.731	38.469	2.683	30.356	-0.854	55.062	-6.91	14.533	27.101	26.327	1.5	14.987	28.225	37.382	1.745	9.722	32.195	44.506	2.576	24.721	18.965	46.925	1.539	9.001	17.76	31.368	2.034	25.212	41.353	49.995	0.039	8.255	36.21	35.195	-0.673	21.702	23.148	44.917	0.761	12.259	2.598	-0.292	14.769	14.338	20.738	31.678	-0.089
	4.085	15.126	2.731	38.469	2.683	30.356	-0.854	55.062	-6.91	14.533	27.101	26.327	1.5	14.987	28.225	37.382	1.745	14.505	32.195	44.506	2.576	24.721	18.965	46.925	1.539	9.001	37.803	31.368	2.034	25.212	41.353	49.995	0.039	8.255	36.21	35.195	-0.673	21.702	23.148	44.917	0.761	12.259	2.598	-0.292	14.769	14.338	20.738	31.678	-0.089
	4.085	15.126	40.859	51.938	2.683	30.356	-0.854	55.062	-6.91	14.122	27.101	26.327	1.5	14.987	28.225	37.382	1.745	14.505	32.195	44.506	2.576	24.721	18.965	46.925	1.539	9.001	37.803	31.368	2.034	25.212	41.353	49.995	0.039	8.255	36.21	35.195	-0.673	21.702	23.148	44.917	0.761	12.259	2.598	-0.292	-4.3	14.338	20.738	31.032	-0.089
	4.085	15.126	40.859	51.938	2.683	30.356	-0.854	55.062	-6.91	14.122	27.101	26.327	1.5	14.987	27.343	37.382	1.745	14.505	32.195	44.506	2.576	24.721	18.965	46.925	1.539	9.001	37.803	31.368	2.034	25.212	41.353	49.995	0.039	8.255	36.21	35.195	-0.673	21.702	23.148	44.917	0.761	12.259	2.598	-0.292	-4.3	14.338	20.738	31.032	-0.089
	4.085	15.126	40.859	51.938	2.683	30.356	-0.854	55.062	-13.29	14.122	27.101	26.327	1.5	14.987	27.343	37.382	1.745	6.956	32.195	44.506	2.576	24.721	18.965	46.925	1.539	9.001	37.803	39.103	2.034	25.212	41.353	49.995	0.039	8.255	36.21	35.195	-0.673	21.702	23.148	44.917	0.761	12.259	2.598	-0.292	-4.3	14.338	20.738	31.032	-0.089
	4.085	15.126	8.886	51.938	2.683	30.356	-0.854	44.116	-13.29	14.122	27.101	26.327	1.5	14.987	27.343	37.382	1.745	6.956	32.195	44.506	2.576	24.721	18.965	46.925	0.084	9.001	37.803	39.103	2.034	25.212	41.353	49.995	0.039	7.731	36.21	35.195	-0.673	21.702	23.148	44.917	0.761	12.259	2.598	-0.292	-4.3	14.338	20.738	31.286	-0.089
	4.085	15.126	8.886	51.938	2.683	30.356	-0.854	44.116	-13.29	14.122	27.101	30.561	1.5	14.987	27.343	37.382	1.745	6.956	32.195	44.506	2.576	24.721	18.965	46.925	0.084	9.001	37.803	39.103	2.034	13.07	41.353	49.995	0.039	7.731	36.21	45.425	-0.673	21.702	23.148	44.917	0.761	12.259	2.598	-0.292	-4.3	14.338	20.738	31.286	-0.089
	4.085	15.126	13.137	51.938	2.683	16.323	-0.854	44.116	-13.043	14.122	27.101	30.561	1.5	14.987	27.343	37.382	1.745	6.956	32.195	40.098	2.576	24.721	18.965	46.925	0.084	9.001	37.803	39.103	2.034	13.07	41.353	49.995	0.039	7.731	36.21	45.425	-0.673	21.702	23.148	44.917	0.761	12.259	2.598	-0.292	-4.3	14.338	20.738	31.286	-0.089
	4.085	15.126	13.137	51.938	2.683	16.323	-0.854	44.116	-13.043	14.122	27.101	43.404	2.657	14.987	27.343	37.382	1.745	6.956	32.195	40.098	2.576	24.721	18.965	46.925	0.084	9.001	37.803	39.103	-10.13	13.07	41.353	49.995	0.039	7.731	36.21	45.425	-0.673	21.702	23.148	44.917	0.761	12.259	2.598	-0.292	-4.3	14.338	20.738	31.286	-0.089
	4.085	15.126	13.137	51.938	2.683	16.323	-0.854	44.116	-13.043	14.122	27.101	43.404	2.657	14.987	27.343	37.382	1.745	6.956	32.195	40.098	2.576	24.721	18.965	46.925	0.084	9.001	37.803	39.103	-10.13	19.131	41.353	49.995	0.039	7.731	36.21	45.425	-0.673	21.702	23.148	44.917	0.761	12.259	2.598	-0.292	-4.3	14.338	20.738	31.286	-0.089
	4.085	15.126	13.137	51.938	2.683	16.323	-0.854	29.687	-13.043	14.122	27.101	43.404	2.657	14.987	27.343	37.382	1.745	6.956	32.195	40.098	2.576	24.721	18.965	46.925	0.084	9.001	37.803	39.103	-10.13	19.131	41.353	49.995	0.039	7.731	36.21	45.425	-0.673	21.702	23.148	44.917	0.761	12.259	2.598	-0.292	-4.3	14.338	20.738	32.76	-0.089
	4.085	15.126	13.137	51.938	2.683	16.323	-0.854	29.687	-13.043	14.122	27.101	43.404	2.657	14.987	27.343	37.382	1.745	6.956	32.195	40.098	2.576	24.721	18.965	46.925	0.084	9.001	37.803	39.103	-10.13	19.131	41.353	49.995	0.039	7.616	36.21	32.345	-0.673	21.702	23.148	44.917	0.761	12.259	2.598	-0.292	-4.3	14.338	20.738	32.76	-0.089
	4.085	15.126	13.137	51.938	2.683	16.323	-0.854	29.687	-13.043	14.122	27.101	43.404	2.657	14.987	26.373	37.382	1.745	6.956	32.195	40.098	2.576	24.721	18.965	46.925	0.084	9.001	37.803	39.103	-10.13	13.355	41.353	49.995	0.039	7.616	36.21	32.345	-0.673	21.702	23.148	44.917	0.761	12.259	2.598	-0.292	-4.3	14.338	20.738	32.76	-0.089
	4.085	15.126	13.137	51.938	2.683	16.323	-0.854	29.687	-13.043	14.122	27.101	43.404	2.657	14.987	26.373	37.382	1.745	6.956	32.195	50.911	2.576	24.721	18.965	46.925	0.084	9.001	37.803	39.103	-10.13	13.355	41.353	49.995	0.039	7.616	36.21	32.345	-0.673	21.702	23.148	44.917	0.761	12.259	2.598	-0.292	-4.3	14.338	20.738	32.76	0.163
	4.085	15.126	13.137	51.938	2.683	16.323	-0.854	29.687	-13.043	14.122	27.101	43.404	-5.325	14.987	26.373	37.382	1.745	6.956	32.195	50.911	2.576	24.721	18.965	46.925	0.084	9.001	37.803	39.103	-10.13	13.355	41.353	49.995	0.039	7.616	36.21	32.345	-0.673	21.702	23.148	44.917	0.761	12.259	2.598	-0.292	0.049	14.338	20.738	32.76	0.163
	4.085	15.126	13.137	52.72	2.683	16.323	-0.854	50.885	-15	11.983	27.101	43.404	-5.325	14.987	26.373	37.382	1.745	6.956	32.195	50.911	-19.276	24.721	18.965	46.925	0.084	9.001	37.803	39.103	4.436	13.355	41.353	49.995	0.039	7.616	36.21	32.345	-0.673	21.702	23.148	44.917	0.761	12.259	2.598	-0.292	0.049	14.338	21.187	32.76	0.163
	4.085	15.126	13.137	52.72	2.683	16.323	-0.854	50.885	-15	11.983	27.101	43.404	-5.325	14.987	33.917	37.382	-2.778	6.956	32.195	50.911	-19.276	21.556	18.965	46.925	0.084	9.001	37.803	29.742	4.436	13.355	41.353	49.995	0.039	7.616	36.21	32.345	-0.673	21.702	23.148	44.917	0.761	12.259	2.598	-0.292	7.763	14.338	21.187	32.76	0.163
	4.085	16.958	13.137	52.72	2.683	16.323	-0.854	50.885	-5.395	11.983	27.101	43.404	-0.244	14.987	33.917	37.382	-2.778	6.956	32.195	50.911	-19.276	21.556	18.965	49.79	0.084	9.001	37.803	29.742	4.436	13.355	41.353	49.995	0.039	7.616	36.21	32.345	-0.673	21.702	23.148	44.917	0.761	12.259	2.598	-0.292	5.073	14.338	-1.553	32.76	0.163
	4.085	16.958	13.137	52.72	2.683	16.323	-0.854	35.175	-5.395	11.983	27.101	43.404	-0.244	14.987	33.917	37.382	-2.778	6.956	32.195	50.911	-19.276	21.556	18.965	49.79	0.084	9.001	37.803	29.742	4.436	13.355	43.342	49.995	0.039	7.616	36.21	32.345	-0.673	21.702	23.148	44.917	0.761	12.259	2.598	-0.292	5.073	14.338	-1.553	32.76	0.163
	4.085	16.958	13.137	52.72	2.683	16.323	-0.854	35.175	-5.395	11.983	27.101	43.404	-8.538	14.987	33.917	37.382	-3.555	6.956	32.195	50.911	-19.276	21.556	18.965	49.79	0.084	9.001	37.803	29.742	4.436	26.834	43.342	49.995	0.039	7.616	36.21	32.345	-0.673	21.702	23.148	44.917	0.761	12.259	2.598	-0.292	5.073	14.338	-1.553	32.76	0.163
	4.085	16.958	13.137	52.72	2.683	16.323	-0.854	35.175	-13.521	11.983	27.101	43.404	-8.538	14.987	33.917	37.382	-3.555	6.956	32.195	50.911	-19.276	21.556	18.965	49.79	0.084	9.001	42.298	29.742	4.436	26.834	43.342	49.995	0.039	7.616	36.21	32.345	-0.673	21.702	23.148	44.917	0.761	12.259	2.598	-0.292	5.073	14.338	-1.553	32.76	0.163
	4.085	16.958	13.137	52.72	2.683	16.323	-0.854	35.175	-13.521	11.983	27.101	41.284	-8.538	14.987	29.578	37.382	-3.555	6.956	32.195	50.911	-19.276	21.556	18.965	49.79	0.084	9.001	42.298	29.742	4.436	26.834	43.342	49.995	0.039	7.616	36.21	32.345	-0.673	21.702	23.148	44.917	0.761	21.211	2.598	-0.292	5.073	14.338	-1.553	32.76	0.163
	4.085	16.958	13.137	52.72	2.683	16.323	-0.854	35.175	-13.521	11.983	27.101	41.284	-8.538	14.987	29.578	37.382	2.175	6.956	32.195	54.591	3.66	21.556	18.965	49.79	0.084	9.001	42.298	29.742	4.436	14.732	43.342	49.995	0.039	7.616	36.21	32.345	-0.673	26.706	23.148	44.917	0.761	21.211	2.598	-0.292	5.073	14.338	-1.553	32.76	0.163
	4.085	16.958	13.137	39.334	2.683	16.323	-0.854	35.175	-12.148	11.983	27.101	41.284	-8.538	14.987	29.578	29.307	2.175	6.956	32.195	54.591	3.66	21.556	18.965	49.79	0.084	9.001	42.298	29.742	4.436	14.732	43.342	49.995	0.039	7.616	36.21	32.345	-0.673	26.706	23.148	44.917	0.761	21.211	2.598	-0.292	5.073	14.338	-1.553	32.76	0.163
	4.085	16.958	13.137	39.334	2.683	16.323	-0.854	41.581	-12.148	11.983	27.101	41.284	-8.538	14.987	29.578	29.307	2.175	6.956	32.195	54.591	3.66	21.556	18.965	49.79	0.084	9.001	42.298	29.742	4.436	14.732	43.342	49.995	0.039	7.616	36.21	32.345	-0.673	26.706	23.148	44.917	3.34	21.211	2.598	-0.292	5.073	14.338	-1.553	32.76	0.163
	4.085	16.958	13.137	40.463	2.683	16.323	-0.854	41.581	-12.148	11.983	27.101	41.284	-8.538	14.987	29.578	29.307	2.175	6.956	32.195	54.591	3.66	21.556	18.965	49.79	0.084	9.001	42.298	29.742	4.436	14.732	43.342	49.995	0.039	7.616	36.21	32.345	-0.673	26.706	23.148	44.917	3.34	21.211	2.598	-0.292	5.073	14.338	-1.553	32.76	0.163
	4.085	16.958	13.137	40.463	0.362	16.323	-0.854	41.581	5.093	11.983	27.101	39.624	2.826	14.987	29.578	58.291	2.175	6.956	32.195	54.591	3.66	21.556	18.965	49.79	0.084	9.001	42.298	29.742	4.436	14.732	43.342	49.995	0.039	7.616	36.21	32.345	-0.673	26.706	23.148	44.917	3.34	21.211	2.598	-0.292	5.073	14.338	-1.553	32.76	0.163
	4.085	16.958	13.137	40.463	0.362	16.323	-0.854	41.581	5.093	11.983	27.101	39.624	2.826	14.987	29.578	58.291	2.175	6.956	32.195	54.591	3.66	21.556	18.965	49.79	0.084	9.001	42.298	29.742	4.436	14.732	43.342	49.995	0.039	7.616	36.21	32.345	-0.673	26.706	23.148	44.917	3.34	21.211	2.598	-0.292	5.073	14.338	-1.553	32.76	0.163
	4.085	16.958	13.137	50.67	0.362	21.486	-0.854	41.581	5.093	11.983	25.038	39.624	2.826	9.191	29.578	58.291	2.175	6.956	32.195	54.591	3.66	21.556	18.965	49.79	0.084	9.001	42.298	29.742	4.436	14.732	43.342	49.995	0.039	7.616	36.21	32.345	-0.673	26.706	23.148	44.917	3.34	21.211	2.598	-0.292	-0.605	14.338	-1.553	32.76	0.163
	-3.644	16.958	13.137	50.67	0.362	21.486	-0.854	41.581	5.093	11.983	25.038	39.624	2.826	9.191	29.578	32.798	2.175	6.956	32.195	54.591	3.66	21.556	18.965	49.79	0.084	9.001	38.625	29.742	4.436	12.493	43.342	49.995	0.039	7.616	46.9	32.345	-0.673	19.195	23.148	44.917	3.34	21.211	2.598	-0.292	-0.605	14.338	-1.553	32.76	0.163
	-3.644	16.958	13.137	50.67	0.362	21.486	-0.854	41.581	5.093	11.983	25.038	39.624	-2.236	9.191	29.578	32.798	2.175	6.956	32.195	54.591	3.66	21.556	18.965	49.79	0.084	9.001	38.625	29.742	4.436	12.493	43.342	49.995	0.039	7.616	46.9	32.345	-0.673	19.195	23.148	44.917	3.34	8.003	2.598	-0.292	-0.605	14.338	-1.553	32.76	0.163
	-3.644	16.958	13.137	50.67	0.362	21.486	-0.854	41.581	5.093	11.983	25.038	39.624	-2.236	9.191	29.578	45.857	2.175	6.956	32.195	54.591	3.66	21.556	18.965	49.79	0.084	9.001	38.625	29.742	4.436	12.493	43.342	49.995	0.039	7.616	46.9	32.345	-0.673	19.195	23.148	44.917	3.34	8.003	2.598	-0.292	-4.907	14.338	-1.553	32.76	0.163
	-3.644	16.958	13.137	50.67	0.362	21.486	-0.854	41.581	5.093	11.983	25.038	39.624	-2.236	9.191	29.578	45.857	-1.163	6.956	32.195	54.591	3.66	21.556	18.965	49.79	0.084	9.001	38.625	29.742	4.436	12.493	43.342	49.995	0.039	7.616	46.9	32.345	-0.673	19.195	23.148	44.917	-0.382	8.003	2.598	-0.292	-4.907	8.55	-1.553	32.76	0.163
	-3.644	16.958	13.137	50.67	0.362	21.486	-0.854	41.581	5.093	11.983	25.038	39.624	-2.236	9.191	29.578	45.857	-1.163	6.956	32.195	54.591	3.66	21.556	18.965	49.79	0.084	9.001	38.625	29.742	4.436	12.493	43.342	49.995	0.039	7.616	46.9	32.345	-0.673	19.195	23.148	44.917	-0.382	8.003	2.598	-0.292	-4.907	8.55	-1.553	32.76	0.163
	-3.644	16.958	13.137	50.67	0.362	21.486	-0.854	41.581	5.093	11.983	25.038	39.624	-2.236	9.191	29.578	45.857	-1.163	6.956	32.195	54.591	1.076	21.556	18.965	49.79	0.084	9.001	38.625	29.742	4.436	12.493	43.342	49.995	0.039	7.616	42.101	32.345	-0.673	19.195	23.148	44.917	-0.382	8.003	2.598	-0.292	-4.907	8.55	-1.553	32.76	0.163
	3.061	16.958	13.137	50.67	0.362	21.486	-0.854	41.581	5.093	11.983	25.038	39.624	-5.039	9.191	29.578	45.857	-1.163	6.956	32.195	54.591	1.076	21.556	18.965	49.79	0.084	9.001	38.625	29.742	4.436	12.493	43.342	49.995	0.039	7.616	42.101	32.345	-0.673	19.195	23.148	44.917	-0.382	8.003	2.598	-0.292	-4.907	8.55	-1.553	32.76	-0.118
	3.061	16.958	13.137	50.67	0.362	21.486	-0.854	41.581	5.093	11.983	25.038	39.624	-5.039	9.191	29.578	45.857	-1.163	6.956	32.195	54.591	1.076	21.556	18.965	49.79	0.084	9.001	38.625	29.742	4.436	12.493	43.342	49.995	0.039	7.616	42.101	32.345	-0.673	15.508	23.148	44.917	-0.382	8.003	2.598	-0.292	-4.907	8.55	-1.553	32.76	-0.118
	3.061	16.958	13.137	50.67	0.362	21.486	-0.854	41.581	5.093	11.983	25.038	39.624	-5.039	9.191	29.578	45.857	-1.163	6.956	32.195	42.511	1.076	21.556	18.965	49.79	0.084	9.001	38.625	29.742	-0.629	12.493	43.342	49.995	0.039	7.616	42.101	33.767	-0.673	15.508	23.148	44.917	-0.382	8.003	2.598	-0.292	-4.907	17.765	-1.553	32.76	-0.118
	3.061	16.958	13.137	50.67	0.362	21.486	-0.854	41.581	5.093	11.983	21.296	39.624	-5.039	9.191	29.578	45.857	-1.163	6.956	32.195	42.511	1.076	21.556	18.965	49.79	0.084	9.001	38.625	29.742	-0.629	12.493	43.342	49.995	0.039	7.616	42.101	33.767	-0.673	15.508	23.148	44.917	4.569	8.003	2.598	-0.292	-4.907	17.765	-1.553	32.76	-0.118
	3.061	16.958	13.137	50.67	0.362	21.486	-0.854	41.581	5.093	11.983	21.296	39.624	3.8	9.191	29.578	45.857	-1.163	6.956	32.195	42.511	1.076	21.556	18.965	49.79	0.084	9.001	38.625	29.742	-0.629	12.493	43.342	49.995	0.039	7.616	42.101	33.767	-0.673	15.508	23.148	44.917	4.569	8.003	2.598	-0.292	-4.907	17.765	-1.553	32.76	-0.118
	3.061	16.958	13.137	36.885	0.362	21.486	-0.854	39.291	5.093	11.983	21.296	39.624	3.8	9.191	29.578	45.857	-1.163	6.956	32.195	42.511	1.076	21.556	18.965	49.79	0.084	9.001	38.625	29.742	-0.629	12.493	43.342	49.995	0.039	7.616	42.101	33.767	-0.673	15.508	23.148	44.917	-1.934	8.003	2.598	-0.292	-4.907	17.765	-1.553	32.76	-0.118
	3.061	16.958	13.137	36.885	0.362	21.486	-0.854	39.291	7.789	11.983	21.296	39.624	3.8	9.191	22.638	32.551	-1.163	6.956	32.195	42.511	1.076	21.556	18.965	55.852	0.084	9.001	38.625	29.742	-0.629	12.493	43.342	49.995	0.039	7.616	42.101	46.588	-0.673	15.508	23.148	44.917	-1.934	8.003	2.598	-0.292	-4.907	17.765	-1.553	32.76	-0.118
	3.061	16.958	13.137	36.885	0.362	21.486	-0.854	66.171	7.789	11.983	21.296	39.624	3.8	9.191	22.638	32.551	-2.585	6.956	32.195	42.511	1.076	21.556	18.965	55.852	0.084	9.001	38.625	29.742	-0.629	12.493	43.342	49.995	0.039	7.616	42.101	46.588	-0.673	15.508	23.148	44.917	-1.934	8.003	2.598	-0.292	10.476	17.765	-1.553	32.76	-0.118
	3.061	16.958	13.137	36.885	0.362	21.486	-0.854	66.171	7.789	11.983	21.296	39.624	3.8	9.191	22.638	32.551	-2.585	6.956	32.195	40.848	1.076	21.556	18.965	55.852	0.084	9.001	38.625	29.742	-0.629	12.493	43.342	49.995	0.039	7.616	42.101	37.894	-0.673	15.508	23.148	44.917	-1.934	8.003	2.598	-0.292	10.476	17.765	-1.553	32.76	-0.118
	3.061	16.958	13.137	37.526	0.362	30.612	-0.854	66.171	7.921	11.983	21.296	39.624	3.8	9.191	22.638	32.551	-2.585	6.956	32.195	40.848	1.076	21.556	18.965	55.852	0.084	9.001	38.625	29.742	-0.629	12.493	43.342	49.995	0.039	7.616	42.101	37.894	-0.673	15.508	23.148	44.917	-1.934	8.003	2.598	-0.292	10.476	17.765	-1.553	32.76	-0.118
	3.061	16.958	13.137	37.526	0.362	30.612	-0.854	42.511	7.921	11.983	21.296	39.624	3.8	9.191	22.638	32.551	-2.585	6.956	32.195	40.848	1.076	21.556	18.965	55.852	0.084	9.001	38.625	29.742	-0.629	12.493	43.342	49.995	0.039	7.616	42.101	37.894	-0.673	15.508	23.148	44.917	-1.934	15.731	2.598	-0.292	10.476	17.765	-1.553	32.76	-0.118
	3.061	16.958	13.137	37.526	0.362	30.612	-0.854	42.511	7.921	11.983	21.296	39.624	3.8	9.191	22.638	32.551	-2.585	6.956	32.195	40.848	1.076	21.556	18.965	55.852	0.084	9.001	38.625	29.742	-0.629	12.493	43.342	49.995	0.039	7.616	42.101	37.894	-0.673	15.508	23.148	44.917	-1.934	15.731	2.598	-0.292	10.476	17.765	-1.553	32.76	-0.118
	-6.874	16.958	13.137	47.187	0.362	17.221	-0.854	54.548	7.921	11.983	21.296	39.624	3.8	9.191	22.638	32.551	-2.585	6.956	32.195	40.848	1.076	21.556	20.666	49.897	0.084	9.001	38.625	29.742	-0.629	12.493	43.342	49.995	0.039	7.616	42.101	37.894	-0.673	15.508	23.148	44.767	-1.934	15.731	2.598	-0.292	10.476	17.765	-3.168	32.76	-0.118
	-6.874	16.958	13.137	47.187	0.362	17.221	-0.854	54.548	7.921	11.983	21.296	39.624	3.8	9.191	22.638	27.865	-2.585	6.956	32.195	40.848	1.076	21.556	20.666	49.897	0.084	9.001	38.625	29.742	-0.629	12.493	43.342	49.995	0.039	13.006	36.963	37.894	-0.673	15.508	23.148	44.767	-1.934	15.731	2.598	-0.292	10.476	17.765	-3.168	32.76	-0.118
	-6.874	13.675	13.137	47.187	0.362	17.221	-0.854	54.548	7.921	11.983	21.296	39.624	3.8	9.191	28.139	27.865	-2.585	6.956	32.195	40.848	1.076	21.556	20.666	49.897	0.084	9.001	38.625	29.742	-0.629	12.493	43.342	49.995	0.039	13.006	36.963	37.894	-0.673	15.508	23.148	44.767	-1.934	15.731	2.598	-0.292	4.646	17.765	-3.168	32.76	-0.118
	-6.874	13.675	13.137	38.558	0.362	17.221	-0.854	62.707	7.921	11.983	21.296	39.624	3.8	9.191	28.139	27.865	-2.585	6.956	32.195	37.741	1.076	21.556	20.666	49.897	0.084	9.001	38.625	29.742	-0.629	12.493	43.342	52.325	0.039	13.006	36.963	37.894	-0.673	15.508	23.148	44.767	-1.934	15.731	2.598	-0.292	4.646	17.765	-3.168	32.76	1.343
	-6.874	13.675	13.137	38.558	0.362	17.221	-0.854	62.707	7.921	11.983	21.296	39.624	3.8	9.191	28.139	27.865	-2.585	6.956	32.195	37.741	1.076	21.556	20.666	49.897	0.084	9.001	38.625	29.742	-10.086	12.493	43.342	52.325	0.039	11.86	36.963	37.894	-0.673	15.508	23.148	44.767	-1.934	15.731	2.598	-0.292	4.646	17.765	-3.168	32.76	1.343
	-6.874	13.675	13.137	38.558	0.362	17.221	-0.854	43.146	7.921	11.983	21.296	28.786	3.8	9.191	28.139	27.865	-3.724	6.956	32.195	37.741	1.076	21.556	20.666	44.808	0.084	9.001	38.625	39.296	-10.086	18.811	43.342	52.325	0.039	11.86	36.963	37.894	-0.673	15.508	23.148	44.767	-1.934	15.731	2.598	-0.292	4.646	17.765	-3.168	32.76	1.343
	-6.874	13.675	13.137	38.558	0.362	17.221	-0.854	43.146	7.921	11.983	21.296	28.786	3.8	9.191	20.79	35.237	-3.724	6.956	32.195	37.741	1.076	21.556	21.807	44.808	0.084	9.001	38.625	39.296	-10.086	18.811	43.342	52.325	0.039	11.86	36.963	37.894	-0.673	15.508	23.148	44.767	-1.934	15.731	2.598	-0.292	-10.465	17.765	-3.168	32.76	-0.086
	-6.874	13.675	13.137	38.558	0.362	17.221	-0.854	43.146	7.921	11.983	21.296	30.122	3.8	9.191	20.79	35.237	-3.724	6.956	32.195	37.741	1.076	21.556	21.807	44.808	0.084	9.001	38.625	39.296	-10.086	18.811	43.342	52.325	0.039	11.86	36.963	37.894	-0.673	15.508	23.148	44.767	-1.934	15.731	2.598	-0.292	-10.465	17.765	-3.168	32.76	-0.086
	-6.874	13.675	13.137	38.558	0.362	17.221	-0.854	43.146	7.921	11.983	21.296	30.122	3.8	9.191	20.79	35.237	-2.863	6.956	32.195	37.741	1.076	21.556	21.807	43.168	0.084	9.001	38.625	39.296	-10.086	18.811	43.342	52.325	0.039	12.049	36.963	37.894	-0.673	15.508	23.148	44.767	-1.934	15.731	2.598	-0.292	-12.473	17.765	-3.168	32.76	-0.086
	-6.874	13.675	13.137	38.558	0.362	14.894	-0.854	43.146	7.921	11.983	21.296	30.122	3.8	9.191	20.79	64.558	-2.863	6.956	32.195	37.741	1.076	21.556	14.825	43.168	0.084	9.001	38.625	27.955	-10.086	18.811	43.342	52.325	0.039	12.049	36.963	37.894	-0.673	15.508	23.148	44.767	-1.934	15.731	2.598	-0.292	-12.473	17.765	-3.168	32.76	-0.086
	-6.874	13.675	13.137	38.558	0.362	14.894	-0.854	59.245	7.921	11.983	21.296	30.122	3.8	6.489	20.79	64.558	-2.863	6.956	32.195	37.741	1.076	23.56	14.825	43.168	0.084	9.001	38.625	27.955	-1.734	18.811	43.342	52.325	0.039	12.049	36.963	37.894	-0.673	15.508	23.148	44.767	-1.934	15.731	2.598	-0.292	-12.473	17.765	-3.168	32.76	-0.086
	-6.874	13.675	13.137	38.558	0.362	14.894	-0.854	59.245	7.921	11.983	21.296	30.122	-3.492	6.489	20.79	64.558	-2.863	6.956	32.195	37.741	1.076	26.577	14.825	43.168	0.084	9.001	38.625	27.955	-1.734	18.811	43.342	52.325	0.039	11.878	36.963	37.894	-0.673	15.508	23.148	44.767	-1.934	15.731	2.598	-0.292	-12.473	17.765	-3.168	32.76	-0.086
	-6.874	13.675	13.137	38.558	0.362	14.894	18.707	67.024	7.921	11.983	21.296	30.122	-3.492	6.489	20.79	40.18	-2.863	6.956	32.195	37.741	1.076	26.577	14.825	43.168	0.084	9.001	38.625	27.955	-8.484	18.811	43.342	52.325	0.039	11.878	36.963	37.894	-0.673	15.508	23.148	44.767	-1.934	15.731	2.598	-0.292	-12.473	17.765	-3.168	32.76	-0.086
	-4.689	13.675	13.137	38.558	0.362	14.894	18.707	67.024	7.921	11.983	21.296	30.122	-3.492	7.237	20.79	40.18	-2.863	6.956	32.195	37.741	1.076	26.577	14.825	43.168	0.084	9.001	38.625	27.955	-8.484	18.811	43.342	52.325	0.039	11.749	36.963	37.894	-0.673	15.508	23.148	44.767	-1.934	15.731	2.598	-0.292	-12.473	17.765	-3.168	32.76	-0.086
	-4.689	13.675	13.137	38.558	0.362	16.23	18.707	64.578	7.921	11.983	21.296	30.122	-3.492	7.237	20.79	40.18	-2.863	19.989	32.195	37.741	1.076	26.577	14.825	43.168	0.084	9.001	38.625	27.955	-8.484	18.811	43.342	52.325	0.039	11.749	36.963	37.894	-0.673	15.508	23.148	44.767	-1.934	15.731	2.598	-0.292	-12.473	23.864	-3.168	32.76	-0.086
	-4.689	13.675	13.137	38.558	0.362	16.23	18.707	64.578	7.921	11.983	21.296	30.122	-3.492	7.237	20.79	47.684	-2.863	19.989	32.195	37.741	1.076	26.577	14.825	43.168	0.084	9.001	38.625	27.955	3.929	18.811	43.342	52.325	0.039	7.009	36.963	42.617	-0.673	15.508	23.148	44.767	-1.934	15.731	2.598	-0.292	5.242	23.864	-3.168	32.76	-0.086
	-4.689	7.722	13.137	38.558	0.362	16.23	25.068	64.578	7.921	11.983	21.296	30.122	-3.492	7.605	20.79	47.684	-2.863	7.66	32.195	35.859	1.076	26.577	14.825	43.168	0.084	9.001	38.625	27.955	3.929	18.811	43.342	52.325	0.039	7.009	36.963	42.617	-0.673	15.508	23.148	44.767	-1.934	15.731	2.598	-0.292	5.242	22.238	-3.168	32.76	-0.086
	-4.689	7.722	13.137	38.558	0.362	16.23	25.068	64.578	7.921	11.983	21.296	30.122	-3.492	7.605	20.79	47.684	-2.863	7.66	32.195	35.859	1.076	23.564	14.825	43.168	0.084	9.001	38.625	27.955	3.929	18.811	43.342	52.325	0.039	7.009	36.963	42.617	-0.673	15.508	23.148	44.767	-1.934	15.731	2.598	-0.292	5.242	22.238	-3.168	32.76	-0.086
	-4.689	7.722	13.137	38.558	0.362	16.23	25.068	64.578	7.921	11.983	21.296	30.122	-3.492	7.605	20.79	47.684	-2.863	12.29	32.195	35.859	1.076	23.564	14.825	43.168	0.084	9.001	38.625	27.955	3.929	18.811	43.342	52.325	0.039	7.009	36.963	42.617	-0.673	15.508	23.148	44.767	-1.934	15.731	2.598	-0.292	-0.948	22.238	-3.168	32.76	-0.086
	-4.689	7.722	13.137	38.558	0.362	16.23	17.145	47.636	7.921	11.983	21.296	30.122	-4.514	7.605	20.79	47.684	-2.863	12.29	32.195	35.859	1.076	23.564	14.825	43.168	0.084	9.001	38.625	27.955	3.794	18.811	43.342	52.325	0.039	7.009	36.963	42.617	-0.673	15.508	23.148	44.767	-1.934	15.731	2.598	-0.292	-0.948	22.238	-3.168	32.76	-0.086
	-4.689	7.722	13.137	38.558	0.362	16.23	17.145	47.636	7.921	11.983	21.296	30.122	-4.514	7.605	20.79	47.684	-2.863	12.29	32.195	35.859	1.076	23.564	14.825	43.168	0.084	9.001	38.625	27.955	3.794	18.811	43.342	52.325	0.039	7.009	36.963	42.617	-0.673	15.508	23.148	44.767	-1.934	15.731	2.598	-0.292	-0.948	22.238	-3.168	32.76	-0.086
	-4.689	7.722	15.497	38.558	0.362	24.392	13.772	47.636	7.921	11.983	21.296	30.122	-4.514	7.605	20.79	51.213	-2.863	12.29	32.195	35.859	1.076	23.564	14.825	43.168	0.084	9.001	38.625	27.955	3.794	18.811	43.342	52.325	0.039	19.319	36.963	42.617	-0.673	15.508	23.148	44.767	-1.934	15.731	-5.047	-0.292	-0.948	22.238	-3.168	32.76	-0.086
	-4.689	15.003	15.497	38.558	0.362	24.392	13.772	47.636	7.921	11.983	21.296	30.122	4.726	7.605	20.79	51.213	-2.863	12.29	32.195	35.859	1.076	23.564	14.825	43.168	0.084	9.001	38.625	27.955	3.794	18.811	43.342	52.325	0.039	19.319	36.963	42.617	-0.673	15.508	23.148	44.767	-1.934	15.731	-5.047	-0.292	-0.948	22.238	-3.168	32.76	-0.086
	1.116	15.003	15.497	38.558	0.362	24.392	13.772	47.636	1.5	11.983	21.296	30.122	4.726	7.605	20.79	51.213	-2.863	12.29	32.195	39.191	1.076	23.564	14.825	43.168	0.084	9.001	38.625	27.955	-3.628	18.811	43.342	52.325	0.039	19.319	36.963	42.617	-0.673	15.508	23.148	44.767	-1.934	15.731	-5.047	-0.292	-0.948	22.238	-3.168	32.76	-0.086
	1.116	15.003	30.016	38.558	0.362	24.392	13.772	47.636	1.5	11.983	21.296	30.122	-1.206	7.605	20.79	36.677	-2.863	12.29	32.195	39.191	1.076	18.627	14.825	43.168	0.084	9.001	3.061	27.955	-3.628	18.811	43.342	52.325	0.039	19.319	32.246	42.617	-0.673	15.508	23.148	44.767	-1.934	15.731	-5.047	-0.292	-0.948	22.238	-3.168	32.76	-0.086
	1.116	15.003	30.016	38.558	0.362	24.392	13.772	47.636	1.5	11.983	21.296	30.122	-1.206	7.605	20.79	36.677	-2.863	12.29	32.195	39.191	1.076	18.627	14.825	43.168	0.084	9.001	3.061	27.955	-3.628	14.698	43.342	52.325	0.039	8.369	32.246	42.617	-0.673	15.508	23.148	44.767	-1.934	15.731	-5.047	-0.292	-0.948	22.238	-3.168	32.76	-0.086
	1.116	15.003	30.016	38.558	0.362	24.392	13.772	49.842	1.5	11.983	21.296	30.122	-1.206	7.605	20.79	36.677	-2.863	12.29	32.195	39.191	1.076	18.627	14.825	43.168	0.084	9.001	3.061	27.955	-3.628	14.698	43.342	52.325	0.039	8.369	32.246	42.617	-0.673	15.508	23.148	44.767	-1.934	15.731	-5.047	-0.292	-0.948	22.238	-3.168	32.76	-0.086
	1.116	15.003	30.016	38.558	0.362	24.392	13.772	49.842	1.5	11.983	21.296	30.122	-1.206	7.605	20.79	36.677	-2.863	12.29	32.195	39.191	1.076	18.627	14.825	43.168	0.084	9.001	3.061	27.955	-3.628	14.698	43.342	52.325	0.039	8.369	32.246	42.617	-0.673	15.508	23.148	44.767	-1.934	15.731	0.128	-0.292	-0.948	22.238	-3.168	32.76	-0.086
	1.116	15.003	8.749	38.558	0.362	24.392	13.772	49.842	1.5	11.983	21.296	30.122	-1.206	7.605	20.79	36.677	-2.863	12.29	32.195	39.191	1.076	18.627	14.825	43.168	0.084	9.001	18.547	27.955	-3.628	16.717	43.342	52.325	0.039	8.369	32.246	42.617	-0.673	15.508	23.148	44.767	-1.934	15.731	0.128	-0.292	-0.948	22.238	-3.168	32.76	-0.086
	1.116	15.003	8.749	38.558	0.362	9.54	13.772	40.376	1.5	11.983	21.296	30.122	-1.206	7.605	20.79	36.677	-2.863	12.29	32.195	36.845	1.076	18.627	14.825	43.168	0.084	9.001	18.547	27.955	-3.628	16.717	43.342	52.325	0.039	8.369	32.246	42.617	-0.673	15.508	23.148	44.767	-1.934	15.731	0.128	-0.292	-0.948	22.238	-3.168	32.76	-0.086
	-4.59	15.003	8.749	38.558	0.362	9.54	13.772	40.376	-2.776	11.983	21.296	30.122	-1.206	14.287	20.79	36.677	-2.863	12.29	32.195	36.845	1.076	18.627	14.825	43.168	0.084	9.001	18.547	27.955	-2.806	16.717	43.342	52.325	0.039	8.369	32.246	42.617	-0.673	15.508	23.148	44.767	1.81	15.731	0.128	-0.292	-0.948	22.238	-3.168	32.76	-0.086
	-4.59	15.003	8.749	38.558	0.362	9.54	13.772	59.246	-2.776	11.983	21.296	30.122	-3.994	14.287	25.737	36.677	-2.863	12.29	32.195	36.845	1.076	18.627	14.825	43.168	0.084	9.001	18.547	27.955	-2.806	16.717	43.342	52.325	0.039	8.369	32.246	34.509	-0.257	15.508	23.148	44.767	1.81	15.731	0.128	-0.292	-0.948	22.238	-3.168	32.76	-0.086
	-4.59	15.003	8.749	38.558	0.362	9.54	13.772	59.246	-2.776	11.983	21.296	30.122	-3.994	14.287	25.737	36.677	-2.863	12.29	32.195	36.845	1.076	18.627	14.825	43.168	0.084	9.001	18.547	27.955	-0.094	16.717	43.342	52.325	0.039	8.369	32.246	36.786	-0.257	15.508	23.148	44.767	1.81	15.731	0.128	-0.292	-0.948	22.238	-3.168	32.182	-0.086
	-12.021	15.003	8.749	38.558	0.362	9.54	13.772	59.246	-2.776	11.983	21.296	30.122	-3.994	14.287	25.737	36.677	-2.863	12.29	32.195	36.845	1.076	18.627	14.825	43.168	0.084	9.001	18.547	27.955	-0.094	16.717	43.342	52.325	0.039	8.369	32.246	36.786	-0.257	15.508	23.148	44.767	1.81	15.731	0.128	-0.292	-0.948	22.238	-3.168	32.182	-0.086
	-12.021	15.003	8.749	47.939	0.362	9.54	13.772	46.88	-2.776	11.983	21.296	30.122	-3.994	14.287	25.737	36.677	-2.863	12.29	32.195	36.845	1.076	18.627	14.825	43.168	0.084	9.001	18.547	27.955	-0.094	16.717	43.342	52.325	0.039	13.572	32.246	36.786	-0.257	15.508	23.148	44.767	1.81	15.731	0.128	-0.292	-0.948	22.238	-3.168	32.182	-0.086
	-12.021	13.164	8.749	52.958	0.362	9.54	13.772	46.88	-2.776	11.983	21.296	30.122	-3.994	14.287	25.737	36.677	-2.863	12.29	32.195	36.845	1.076	18.627	14.825	43.168	0.084	9.001	12.625	27.955	-0.094	16.717	43.342	52.325	0.039	13.572	39.794	36.786	-0.257	15.508	23.148	44.767	1.81	15.731	0.128	-0.292	-0.948	30.972	-3.168	32.182	-0.086
	-12.021	13.164	8.749	52.958	0.362	9.54	13.772	46.88	-2.776	11.983	21.296	30.122	6.128	13.15	31.426	36.677	-2.863	12.29	32.195	36.845	1.076	18.627	14.825	43.168	0.084	9.001	12.625	27.955	-0.094	24.362	43.342	52.325	0.039	13.572	39.794	36.786	-0.257	15.508	23.148	44.767	1.81	15.731	0.128	-0.292	-0.948	30.972	-3.168	32.182	-0.086
	-0.952	13.164	8.749	52.958	0.362	9.54	13.772	46.88	-2.776	11.983	21.296	30.122	6.128	13.15	31.426	36.677	-2.863	12.29	32.195	36.845	1.076	18.627	14.825	47.225	0.084	9.001	12.625	27.955	-0.094	24.362	43.342	52.325	0.039	13.572	39.794	43.976	-0.257	23.534	23.148	44.684	1.81	15.731	0.128	-0.292	-0.948	30.972	-3.168	32.182	-0.086
	-0.952	13.164	8.749	52.958	-5.004	9.54	13.772	46.88	-2.776	11.983	21.296	30.122	6.128	13.15	31.426	36.677	-2.863	12.29	20.788	36.845	6.38	18.627	14.825	47.225	0.084	9.001	12.625	27.955	-0.094	24.362	43.342	52.325	0.039	13.572	39.794	43.976	-0.257	23.534	23.148	44.684	1.81	15.731	0.128	-0.292	-0.948	30.972	-3.168	32.182	-0.086
	-0.952	13.164	8.749	52.958	-5.004	9.54	13.772	46.88	-2.776	11.983	21.296	30.122	6.128	13.15	27.252	39.024	-2.863	12.29	20.788	67.201	6.38	18.627	14.825	47.225	0.084	9.001	21.3	27.955	-0.094	24.362	43.342	52.325	0.039	13.572	39.794	43.976	-0.257	23.534	23.148	44.684	1.81	15.731	0.128	-0.292	-0.948	30.972	-3.168	32.182	-0.086
	-0.952	13.164	8.749	52.958	-5.004	9.54	13.772	46.88	-3.229	11.983	21.296	30.122	6.128	13.15	27.252	39.024	-2.863	12.29	20.788	67.201	6.38	18.627	14.825	47.225	0.084	9.001	21.3	27.955	-0.094	24.362	43.342	52.325	0.039	13.572	39.794	34.497	-0.257	23.534	23.148	44.684	1.81	15.731	0.128	-0.292	-0.948	30.972	-3.168	32.182	-0.086
	-0.952	13.164	8.749	49.464	3.074	9.54	13.772	46.88	-3.229	11.983	21.296	30.122	6.128	13.15	27.252	39.024	-2.863	12.29	20.788	67.201	6.38	18.627	14.825	47.225	0.084	9.001	21.3	27.955	-0.094	24.362	43.342	52.325	0.039	13.572	40.255	34.497	-0.257	23.534	23.148	44.684	1.81	15.731	0.128	-0.292	-0.948	30.972	-3.168	32.182	-0.086
	-0.952	13.164	8.749	41.679	3.074	9.54	13.772	50.893	-2.151	11.983	21.296	30.122	6.128	13.15	27.252	39.024	-2.863	12.29	20.788	68.357	6.38	18.627	14.825	47.225	0.084	9.001	22.958	27.955	-0.094	24.362	43.342	52.325	0.039	13.572	40.255	34.497	-0.257	23.534	21.162	44.684	1.81	15.731	0.128	-0.292	-0.948	30.972	-3.168	32.182	-0.086
	-0.952	13.164	8.749	41.679	3.074	9.54	19.706	50.893	-2.151	11.983	21.296	30.122	6.128	13.15	27.252	39.024	-2.863	12.29	20.788	68.357	6.38	18.627	14.825	47.225	0.084	9.001	22.958	39.121	-0.094	24.362	43.342	52.325	0.039	13.572	40.255	34.497	-0.257	23.534	21.162	44.684	1.81	15.731	0.128	-0.292	-0.948	30.972	-3.168	32.182	-0.086
	-0.952	13.164	8.749	41.679	3.074	9.54	19.706	50.893	-2.151	11.983	21.296	30.122	6.128	13.15	27.252	39.024	-2.863	12.29	30.197	68.357	10.956	18.627	14.825	47.225	0.084	9.001	22.958	39.121	-0.094	24.362	43.342	52.325	0.039	13.572	40.255	34.497	-0.257	23.534	21.162	44.684	1.81	15.731	0.128	-0.292	-0.948	30.972	-3.168	32.182	-0.086
	-0.952	13.164	8.749	41.679	3.074	9.54	11.344	50.893	-2.151	11.983	21.296	30.122	6.128	13.15	27.252	39.024	-2.863	12.29	30.197	68.357	10.956	18.627	14.825	47.225	-1.864	9.001	22.958	39.121	-0.094	24.362	43.342	52.325	0.039	13.572	40.255	34.497	-0.257	23.534	21.162	44.684	1.81	15.731	0.128	-0.292	-0.948	30.972	-3.168	32.182	-0.086
	11.646	13.164	8.749	39.737	3.074	9.54	11.344	50.893	-2.151	11.983	21.296	30.122	6.128	13.15	27.252	39.024	-2.863	12.29	30.197	68.357	10.956	18.627	14.825	47.225	-1.864	9.001	22.958	39.121	-0.094	24.362	43.342	52.325	0.039	13.572	40.255	34.497	-0.257	23.534	21.162	44.684	1.81	15.731	0.128	-0.292	-0.948	30.972	-3.168	32.182	-0.086
	11.646	13.164	8.749	39.737	3.074	9.54	11.344	50.893	-2.151	11.983	21.296	30.122	6.128	13.15	27.252	39.024	-2.863	12.29	30.197	68.357	-5.411	18.627	14.825	47.225	-1.864	9.001	22.958	39.121	-0.094	24.362	43.342	52.325	0.039	13.572	40.255	34.497	-0.257	23.534	21.162	44.684	1.81	15.731	0.128	-0.292	-0.948	30.972	-3.168	32.182	-0.086
	11.646	13.164	8.749	36.312	3.074	9.54	11.344	50.893	-2.151	11.983	21.296	30.122	6.128	13.15	27.252	40.024	-2.863	12.29	30.197	68.357	-5.411	18.627	14.825	47.225	-1.864	9.001	22.958	39.121	-0.094	24.362	43.342	52.325	0.039	28.297	40.255	34.497	-0.257	23.534	21.162	44.684	1.81	15.731	0.128	-0.292	-0.219	30.972	-3.168	32.182	-0.086
	11.646	13.164	8.749	36.312	-4.394	9.54	11.344	50.893	-2.151	11.983	21.296	30.122	6.128	13.15	27.252	40.024	-2.863	12.29	30.197	68.357	-5.411	18.627	14.825	47.225	-1.864	9.001	22.958	39.121	-0.094	24.362	43.342	52.325	0.039	28.297	40.255	34.497	-0.257	23.534	21.162	44.684	1.81	15.731	0.128	-0.292	-0.219	30.972	-3.168	32.182	-0.086
	-5.29	13.164	28.133	36.312	-4.394	9.54	11.344	46.665	-2.151	11.983	21.296	30.122	6.128	13.15	27.252	40.024	-2.863	12.29	30.197	68.357	-5.411	18.627	14.825	51.766	-1.864	9.001	22.958	39.04	-0.094	24.362	43.342	52.325	0.039	28.297	40.255	34.497	-0.257	23.534	21.162	44.252	1.81	15.731	0.128	-0.292	-0.219	9.832	-3.168	32.182	-0.079
	-5.29	13.164	28.133	36.312	-4.394	9.54	11.344	46.665	-2.151	11.983	21.296	30.122	6.128	13.15	27.252	40.024	-2.863	12.29	30.197	68.357	-5.411	18.627	14.825	51.766	-1.864	9.001	22.958	39.04	-0.094	24.362	43.342	52.325	0.039	28.297	40.255	34.497	-0.257	23.534	21.162	44.252	1.81	15.731	0.128	-0.292	-0.219	9.832	6.626	32.182	-0.079
	-5.29	13.164	28.133	36.312	-4.394	9.54	11.344	46.665	-2.151	11.983	21.296	30.122	6.128	13.15	27.252	43.684	-2.863	12.29	30.197	68.357	-5.411	18.627	14.825	51.766	-1.864	9.001	22.958	39.04	-0.094	24.362	43.342	52.325	0.039	28.297	40.255	34.497	-0.257	23.534	21.162	44.252	1.81	15.731	-6.344	-0.292	-0.219	9.832	6.626	32.182	-0.079
	0.254	13.164	28.133	36.312	-4.394	9.54	11.344	52.286	-2.151	11.983	21.296	30.122	6.128	13.15	27.315	43.684	-2.863	12.29	28.267	58.717	-4.256	18.627	14.825	51.766	-1.864	9.001	22.958	39.04	-0.096	24.362	43.342	52.325	0.039	25.754	40.255	34.497	-0.257	23.534	28.34	44.252	1.81	15.731	-6.344	-0.292	-0.219	9.832	6.626	32.182	-0.079
	0.254	13.164	28.133	36.312	-4.394	9.54	11.344	52.286	-2.151	11.983	21.296	30.122	6.128	13.15	27.315	43.684	-2.863	12.29	28.267	58.717	-4.256	18.627	14.825	51.766	-1.864	9.001	22.958	39.04	-0.096	24.362	43.342	52.325	0.039	25.754	40.255	34.497	-0.257	23.534	28.34	44.252	1.81	15.731	-6.344	-0.292	-0.219	16.067	6.626	32.182	-0.079
	0.254	13.164	28.133	36.312	-4.394	9.54	11.344	52.286	-6.131	11.983	21.296	30.122	6.128	13.15	27.315	58.058	-2.863	12.29	28.267	58.717	-4.256	18.627	14.825	51.766	-1.864	9.001	22.958	39.04	-0.096	24.362	43.342	52.325	0.039	25.754	40.255	34.497	-0.257	23.534	28.34	44.252	1.81	15.731	-6.344	-0.292	-0.219	16.067	6.626	32.182	-0.079
	0.254	13.164	28.133	36.312	3.773	9.54	11.344	47.156	-6.131	11.983	21.296	30.122	6.128	11.151	27.315	58.058	-2.863	12.29	28.267	43.541	-4.256	18.627	14.825	51.766	-1.864	9.001	22.958	39.04	-0.096	24.362	43.342	52.325	0.039	25.754	40.255	25.46	-0.257	14.566	28.34	44.252	1.81	15.731	-6.344	-0.292	-0.219	16.067	13.766	32.182	-0.079
	0.254	13.164	28.133	36.312	-1.427	9.54	11.344	47.156	4.062	11.983	21.296	30.122	6.128	11.151	27.315	58.058	-2.863	12.29	28.267	43.541	-4.256	18.627	14.825	51.766	-1.864	9.001	22.958	39.04	-0.096	24.362	43.342	52.325	0.039	25.754	40.255	25.46	-0.257	14.566	28.34	44.252	1.81	15.731	-6.344	-0.292	-0.219	16.067	13.766	32.182	-0.079
	0.254	13.164	28.133	36.312	-1.427	9.54	11.344	47.156	4.062	11.983	21.296	30.122	6.128	14.462	27.315	58.058	-2.863	12.29	28.267	43.541	-4.256	18.627	14.825	51.766	-1.864	9.001	22.958	39.159	-0.096	24.362	43.342	52.325	0.039	25.754	42.63	25.46	-0.257	14.566	28.34	44.252	1.81	15.731	-6.344	-0.292	-0.219	16.067	13.766	32.182	-0.079
	0.254	13.164	28.133	36.312	-1.427	9.54	11.344	47.156	4.062	11.983	21.296	30.122	6.128	14.462	27.315	58.058	-2.863	12.29	28.267	41.18	-4.256	18.627	14.825	51.766	-1.864	9.001	22.958	39.159	-0.096	24.362	43.342	52.325	0.039	26.253	42.63	25.46	-0.257	14.566	28.34	44.252	1.81	15.731	-6.344	-0.292	-0.219	23.861	13.766	32.182	-0.079
	0.254	13.164	28.133	36.312	-1.427	9.54	11.344	47.156	4.062	11.983	21.296	30.122	6.128	14.462	27.315	58.058	-2.863	18.17	30.744	41.18	-4.256	18.627	14.825	51.766	-1.864	9.001	22.958	39.159	-0.096	24.362	43.342	52.325	0.039	26.253	42.63	25.46	-0.257	14.566	28.34	44.252	1.81	15.731	-6.344	-0.292	-0.219	23.861	13.766	32.182	-0.079
	0.254	13.164	28.133	36.312	-1.427	9.54	11.344	42.645	4.062	11.983	21.296	30.122	6.128	14.462	22.804	58.058	-2.863	18.17	30.744	41.18	-4.256	18.627	14.825	51.766	-1.864	9.001	22.958	39.159	-0.096	24.362	43.342	52.325	0.039	26.253	42.63	25.46	-0.257	14.566	28.34	44.252	1.81	15.731	-6.344	-0.292	-0.219	23.861	13.766	32.182	-0.079
	0.254	13.164	15.791	37.217	-1.427	9.54	16.024	42.645	4.062	11.983	21.296	30.122	3.002	14.462	22.804	58.058	-2.84	18.17	30.744	41.18	-6.577	18.627	14.825	51.766	-1.864	9.001	22.958	39.159	-0.096	24.362	43.342	52.325	0.039	26.253	42.63	25.46	-0.257	14.566	28.34	44.252	1.81	15.731	-6.344	-0.292	-0.219	23.861	13.766	32.182	-0.079
	0.254	13.164	15.791	37.217	-0.181	9.54	16.024	42.645	4.062	11.983	21.296	30.122	3.002	14.462	22.804	50.243	-2.84	18.17	30.744	41.18	-6.577	18.627	14.825	51.766	-1.864	9.001	22.958	39.159	-0.096	24.362	43.342	52.325	0.039	26.253	42.63	25.46	-0.257	14.566	28.34	44.252	1.81	15.731	-6.344	-0.292	-0.219	23.861	13.766	32.182	-0.079
	0.254	13.164	15.791	37.217	-0.181	9.54	16.024	42.645	4.062	11.983	21.296	30.122	3.002	14.462	22.804	50.243	-2.84	18.17	30.744	41.18	0.987	18.627	14.825	35.456	-0.778	9.001	22.958	39.159	-0.096	24.362	43.342	52.325	0.039	25.706	40.096	25.46	-0.257	23.652	28.34	44.252	1.81	15.731	-6.344	-0.292	-0.219	23.861	13.766	32.182	-0.079
	-10.78	13.164	15.791	37.217	-0.181	9.54	24.553	42.645	4.062	11.983	21.296	30.122	3.002	14.462	22.804	50.243	-2.84	18.17	30.744	41.18	0.987	18.627	14.825	35.456	-0.778	9.001	32.64	39.159	-0.096	24.362	42.499	52.325	0.039	25.706	40.096	25.46	-0.257	23.652	28.34	44.252	1.81	15.731	-6.344	-0.292	-0.219	23.861	13.766	32.182	-0.079
	-10.78	13.164	15.791	37.217	-0.181	9.54	24.553	28.698	4.062	11.983	21.296	30.122	3.002	14.462	22.804	50.243	-2.84	18.17	34.923	41.18	0.987	18.627	14.825	35.456	-0.778	9.001	32.64	39.159	-0.096	33.052	42.499	52.325	0.039	25.706	36.815	25.46	-0.257	23.652	28.34	44.252	1.81	15.731	-6.344	-0.292	-0.219	23.861	13.766	32.182	-0.079
	-10.78	13.164	15.791	37.217	-0.181	9.54	24.553	28.698	4.062	11.983	21.296	30.122	3.002	14.462	22.804	50.243	-2.84	18.17	34.923	41.18	0.987	18.627	14.825	35.456	0.977	9.001	32.64	47.406	-0.096	33.052	42.499	48.882	0.039	25.706	36.815	25.46	-0.257	23.652	28.34	44.252	1.81	15.731	-6.344	-0.292	-0.219	23.861	17.625	32.182	-0.079
	-10.78	13.164	15.791	37.217	4.117	9.54	24.553	28.698	1.214	11.983	21.296	30.122	3.002	14.462	22.804	50.243	-2.84	18.17	34.923	41.18	0.987	18.627	14.825	43.17	0.977	9.001	32.64	47.406	-0.096	33.052	42.499	48.882	0.039	25.706	36.815	25.46	-0.257	23.652	28.34	44.252	1.81	15.731	-6.344	-0.292	-0.219	23.861	17.625	32.182	-0.079
	-10.78	13.164	15.791	37.217	4.117	9.54	24.553	28.698	1.214	11.983	21.296	30.122	3.002	14.462	26.872	50.243	-2.84	18.17	34.923	41.18	0.987	18.627	14.825	43.17	0.977	9.001	32.64	47.406	-0.096	33.052	42.499	48.882	0.039	25.706	36.815	25.46	-0.257	23.652	28.34	44.252	1.81	15.731	-6.344	-0.292	-0.219	12.202	17.625	32.182	-0.079
	-10.78	13.164	15.791	40.343	4.117	9.54	24.553	60.401	1.214	11.983	21.296	30.122	3.002	14.462	26.872	50.243	-2.84	18.17	34.923	41.18	0.987	18.627	14.825	43.17	0.977	9.001	13.737	47.406	-0.096	33.052	42.499	48.882	0.039	25.706	36.815	25.46	-0.257	23.652	28.34	44.252	1.81	15.731	-6.344	-0.292	-0.219	12.202	30.184	32.182	-0.079
	-10.78	6.963	15.791	40.343	4.117	9.54	24.553	60.401	1.214	11.983	21.296	30.122	3.002	14.462	26.872	50.243	-2.84	18.17	34.923	41.18	0.987	18.627	14.825	43.17	0.977	9.001	13.737	47.406	-0.096	33.052	42.499	48.882	0.039	25.706	36.815	25.46	-0.257	23.652	28.34	44.252	1.81	15.731	-6.344	-0.292	-0.219	12.202	30.184	29.972	-0.079
	-10.78	6.963	15.791	31.092	4.117	9.54	24.553	60.401	1.214	11.983	21.296	30.122	3.002	14.462	26.872	50.243	-2.84	18.17	34.923	41.18	0.987	18.627	14.825	43.17	0.977	9.001	13.737	47.406	-0.096	33.052	42.499	48.882	0.039	25.706	36.815	25.46	-0.257	23.652	28.34	44.252	1.81	15.731	-6.344	-0.292	-0.219	12.202	30.184	29.972	-0.079
	-10.78	13.07	15.791	31.092	4.117	9.54	24.553	60.401	1.214	11.983	21.296	30.122	3.002	14.462	26.872	38.156	-2.84	18.17	34.923	41.18	0.987	18.627	14.825	43.17	6.022	9.001	13.737	47.406	-0.096	33.052	42.499	48.882	0.039	28.432	36.815	25.46	-0.257	23.652	28.34	44.252	1.81	15.731	-6.344	-0.292	-0.219	12.202	30.184	29.972	-0.079
	-10.78	13.07	15.791	30.336	4.117	9.54	24.553	60.401	1.214	11.983	21.296	30.122	3.002	14.462	26.872	38.156	-2.84	18.17	10.086	41.18	0.987	18.627	14.825	43.17	6.022	9.001	13.737	47.406	-0.096	33.052	42.499	48.882	0.039	28.432	36.815	25.46	-0.257	23.652	28.34	44.252	1.81	15.731	-6.344	-0.292	-0.219	12.202	30.184	29.972	-0.079
	-10.78	13.07	15.791	30.336	4.117	9.54	24.553	60.401	1.214	11.983	21.296	30.122	3.002	14.462	26.872	38.156	-2.84	18.17	10.086	44.831	0.987	18.627	14.825	43.17	-8.689	9.001	13.737	47.406	-0.096	33.052	42.499	48.882	0.039	28.432	36.815	25.46	-0.257	23.652	28.34	44.252	1.81	15.731	-6.344	-0.292	-0.219	12.202	41.977	29.972	-0.079
	-10.78	13.07	15.791	30.336	4.117	9.54	24.553	62.923	1.214	8.456	21.296	30.122	3.002	14.462	26.872	38.156	-2.84	18.17	10.086	44.831	0.987	18.627	14.825	43.17	-8.689	9.001	13.737	47.406	-0.096	33.052	42.499	48.882	0.039	28.432	26.173	25.46	-0.257	23.652	28.34	44.252	1.81	15.731	-6.344	-0.292	-0.219	12.202	41.977	29.972	-0.079
	-10.78	13.07	15.791	30.336	4.117	9.54	24.553	62.923	5.618	8.456	21.296	30.122	3.002	14.462	26.872	38.156	-2.84	18.17	10.086	44.831	1.399	15.043	14.825	43.17	-8.689	9.001	-7.571	48.006	-0.096	21.998	42.499	48.882	0.039	28.432	22.973	25.46	-0.257	12.642	28.34	44.252	1.81	15.731	-6.344	-0.292	-0.219	12.202	41.977	29.972	-0.079
	-10.78	13.07	15.791	30.336	4.117	9.54	24.553	62.923	5.618	8.456	21.296	30.122	3.002	14.462	26.872	38.156	-2.84	18.17	16.123	44.831	6.487	15.043	14.825	43.17	-8.689	9.001	-7.571	48.006	-0.096	21.998	42.499	48.882	0.039	28.432	22.973	25.46	-0.257	18.551	28.34	44.252	1.81	15.731	-6.344	-0.292	-0.219	18.636	41.977	29.972	-0.079
	6.399	13.07	15.791	30.336	4.117	9.54	24.553	62.923	-14.081	8.456	21.296	30.122	3.002	14.462	26.872	38.156	-2.84	18.17	16.123	44.831	6.487	15.043	14.825	43.17	2.957	9.001	13.923	48.006	-0.096	21.998	42.499	48.882	0.039	28.432	22.973	25.46	-0.257	18.551	28.34	44.252	1.81	15.731	-6.344	-0.292	-0.219	18.636	41.977	29.972	-0.079
	6.399	13.07	15.791	30.336	4.117	9.54	24.553	62.923	-14.081	8.456	21.296	30.122	3.002	14.462	26.872	38.156	-2.84	18.17	16.123	44.831	6.487	15.043	14.825	43.17	2.957	9.001	13.923	48.006	-0.096	16.311	42.499	48.882	0.039	25.861	22.973	25.46	-0.257	18.551	28.34	44.252	1.81	15.731	-6.344	-0.292	-0.219	18.636	41.977	29.972	-0.079
	6.399	13.07	15.791	30.336	-1.517	9.54	24.553	58.613	-14.081	8.456	21.296	30.122	3.002	14.462	26.872	38.156	-2.623	18.17	25.358	44.831	6.487	14.51	14.825	43.17	2.957	9.001	13.923	46.584	-0.096	16.311	42.499	48.882	0.039	25.861	22.973	33.081	-0.257	18.551	28.34	44.252	1.81	15.731	-6.344	-0.292	-0.219	18.636	41.977	29.997	-0.079
	-3.011	13.07	24.927	30.336	-1.517	9.54	24.553	58.613	-14.081	8.456	21.296	30.122	3.002	14.462	26.872	38.156	-2.623	18.17	25.358	44.831	5.016	14.51	14.825	43.17	2.957	9.001	13.923	46.584	-0.096	16.311	42.499	30.121	0.039	25.861	22.973	33.081	-0.257	18.551	28.34	44.252	1.81	15.731	-6.344	-0.292	-0.219	18.636	41.977	29.997	-0.079
	-3.011	13.07	27.197	30.336	-1.517	9.54	24.553	58.613	1.937	8.456	21.296	30.122	3.002	14.462	26.872	38.156	-2.623	18.17	25.358	44.831	5.016	14.51	14.825	43.17	2.957	9.001	13.923	46.584	-0.096	16.311	42.499	30.121	0.039	25.861	22.973	33.081	-0.257	18.551	28.34	44.252	1.81	15.731	-6.344	-0.292	-0.219	18.636	41.977	29.997	-0.079
	-3.011	13.07	27.197	30.336	-1.517	9.54	24.553	58.613	1.937	8.456	21.296	30.122	3.002	14.462	25.345	38.156	-2.623	18.17	-4.204	44.251	5.016	19.118	14.825	43.17	-2.458	9.001	13.923	46.584	-0.096	16.311	42.499	30.121	0.039	25.861	22.973	33.081	-0.257	18.551	28.34	44.252	1.81	15.731	-6.344	-0.292	-0.219	18.636	41.977	29.997	-0.079
	-3.011	13.07	27.197	30.336	-1.517	9.54	24.553	58.613	1.937	8.456	21.296	30.122	3.002	14.462	25.345	43.904	-2.623	18.17	-4.204	44.251	5.016	19.118	14.825	43.17	-2.458	9.001	14.424	46.584	-0.096	16.311	42.499	30.121	0.039	25.861	22.973	33.081	-0.257	18.551	28.34	44.252	1.81	15.731	-6.344	-0.292	-0.219	18.636	41.977	29.997	0.02
	-3.011	13.07	27.197	30.336	-1.517	9.54	24.553	58.613	-9.735	8.456	21.296	30.122	3.002	14.462	46.994	43.904	-3.554	18.17	-4.204	44.251	5.016	19.118	14.825	43.17	-2.458	9.001	14.424	46.584	-0.096	16.311	42.499	30.121	0.039	25.861	22.973	33.081	-0.257	18.551	28.34	44.252	-0.334	15.731	-6.344	-0.292	-0.219	18.636	43.73	22.379	0.02
	-3.011	13.07	27.197	30.336	-1.517	9.54	24.553	58.613	-9.735	8.456	21.296	30.122	3.002	14.462	46.994	43.904	-3.554	18.17	22.09	44.251	5.016	19.118	14.825	43.17	-2.458	9.001	14.424	46.584	-0.096	16.311	42.499	30.121	0.039	25.861	22.973	33.081	-0.257	18.551	28.34	44.252	-0.334	15.731	-6.344	-0.292	-0.219	18.636	43.73	22.379	0.02
	-3.011	13.07	27.197	30.336	-1.517	9.54	24.553	58.91	-9.735	8.456	21.296	30.122	-2.001	14.462	46.994	43.904	-3.554	18.17	22.09	44.251	1.822	19.118	14.825	43.17	5.932	9.001	14.424	46.584	-0.096	16.311	42.499	30.121	0.039	25.861	22.973	33.081	-0.257	18.551	28.34	44.252	-0.334	15.731	-6.344	-0.292	-0.219	18.636	43.73	22.379	0.02
	-3.011	13.07	27.197	30.336	-1.517	9.54	24.553	58.91	-9.735	8.456	21.296	30.122	-2.001	14.462	23.969	43.904	-2.787	18.17	22.09	44.251	3.686	19.118	14.825	43.17	5.932	9.001	14.424	46.584	-0.096	16.311	42.499	30.121	0.039	25.861	22.973	33.081	-0.257	18.551	28.34	44.252	-0.334	15.731	-6.344	-0.292	-0.219	18.636	36.702	22.379	0.02
	-3.011	13.07	27.197	30.336	-1.517	9.54	24.553	58.91	-9.735	8.456	21.296	30.122	-2.001	14.462	23.969	43.904	-2.787	18.17	22.09	44.251	3.686	19.118	14.825	43.17	-8.629	9.001	14.424	46.584	-5.482	16.311	42.499	30.121	0.039	25.861	22.973	33.081	-0.257	18.551	28.34	44.252	-0.334	15.731	-6.344	-0.292	-0.219	18.636	36.702	22.084	0.02
	-3.011	13.07	23.233	30.336	-1.517	9.54	24.553	54.901	-9.735	8.456	21.296	30.122	-2.001	14.462	23.969	49.688	-2.787	18.17	22.09	44.251	3.686	19.118	14.825	43.17	-8.629	9.001	14.424	46.584	-5.482	16.311	42.115	30.121	0.039	25.861	22.973	33.081	-0.257	18.551	28.34	44.252	-0.334	15.731	-6.344	-0.292	-0.219	18.636	36.702	22.084	0.02
	-3.011	13.07	23.233	30.336	-1.517	9.54	24.553	54.901	-7.383	8.456	21.296	30.122	-2.001	14.462	23.969	49.688	-3.726	18.17	22.09	44.251	3.686	19.118	14.825	43.17	-8.629	9.001	14.424	46.584	-5.482	16.311	42.115	30.121	0.039	25.861	22.973	33.081	-0.257	18.551	28.34	44.252	-0.334	15.731	-6.344	-0.292	-0.219	16.107	33.755	22.084	0.02
	1.385	13.07	48.214	30.336	-1.517	9.54	24.553	54.901	-7.383	8.456	21.296	30.122	-2.001	14.462	23.969	49.688	-3.726	18.17	12.047	44.251	3.686	19.118	14.825	43.17	9.976	9.001	14.424	46.584	-5.482	16.311	42.115	30.121	0.039	25.861	22.973	33.081	-0.257	23.378	28.34	44.252	-0.334	15.731	-6.344	-0.292	-0.219	16.107	33.755	22.084	0.02
	1.385	13.07	48.214	30.336	-1.517	9.54	24.553	45.594	-7.383	8.456	21.296	30.122	-2.001	14.462	23.969	49.688	-3.726	12.227	12.047	44.251	3.686	19.118	14.825	40.743	9.976	9.001	14.424	46.584	-5.482	16.311	42.115	30.121	0.039	25.861	22.973	33.081	-0.257	23.378	28.34	44.252	-0.334	15.731	-6.344	-0.292	-0.219	16.107	30.995	22.084	0.02
	1.385	13.07	48.214	30.336	-1.517	9.54	24.553	45.594	-7.383	8.456	21.296	30.122	-2.001	14.462	23.969	49.688	7.69	12.227	12.047	44.251	5.451	19.118	14.825	40.743	9.976	9.001	14.424	46.584	-5.482	16.311	42.115	30.121	0.039	25.861	22.973	39.958	-0.257	23.378	28.34	44.252	-0.334	15.731	-6.344	-0.292	-0.219	16.107	30.995	22.084	0.02
	1.385	13.07	48.214	30.336	-1.517	9.54	24.553	56.628	-7.383	8.456	21.296	30.122	-2.001	14.462	23.969	61.971	7.69	12.227	12.047	44.251	5.451	19.118	14.825	40.743	1.663	9.001	14.424	46.584	-5.482	16.311	42.115	30.121	0.039	25.861	22.973	39.958	-0.257	23.378	28.34	44.252	-0.334	15.731	-6.344	-0.292	-0.219	16.107	30.995	22.084	0.02
	1.385	13.07	25.798	30.336	-1.517	9.54	24.553	56.628	-7.383	8.456	21.296	30.122	-2.001	14.462	23.969	61.971	7.69	12.227	12.047	44.251	5.451	19.118	14.825	40.743	1.663	9.001	14.424	46.584	3.996	16.311	42.115	25.162	0.039	27.11	22.973	39.958	-0.257	23.378	28.34	44.252	-0.334	15.731	-6.344	-0.292	-0.219	16.107	30.995	22.084	0.02
	0.515	13.07	25.798	30.336	-1.517	9.54	24.553	53.132	-7.383	8.456	21.296	30.122	-2.001	14.462	23.969	61.971	7.69	12.227	12.047	44.251	5.451	19.118	14.825	40.743	0.239	9.001	14.424	46.584	3.996	16.311	42.115	25.162	0.039	27.11	22.973	38.561	-0.257	23.378	28.34	44.252	-0.334	15.731	-3.898	-0.292	1.541	16.107	30.995	22.084	0.02
	0.515	13.07	33.045	30.336	-1.517	9.54	24.553	53.132	-7.383	8.456	21.296	30.122	-2.001	14.462	23.969	61.971	7.69	12.227	12.047	44.251	5.451	19.118	14.825	40.743	0.239	9.001	14.424	46.584	3.996	16.311	42.115	25.162	0.039	27.11	22.973	38.561	-0.257	23.378	28.34	44.252	-0.334	15.731	-3.898	-0.292	1.541	16.107	30.995	22.084	0.02
	-3.802	13.07	33.045	30.336	-1.517	9.54	24.553	53.132	-7.383	14.352	21.296	30.122	-2.001	14.462	23.969	61.971	7.69	12.227	12.047	44.251	5.451	19.118	14.825	40.743	-1.942	9.001	14.424	46.584	3.996	16.311	42.115	25.162	0.039	30.278	22.973	38.561	-0.257	23.378	28.34	44.252	-0.334	15.731	-3.898	-2.738	1.541	16.107	30.995	22.084	0.02
	-3.802	13.07	26.537	30.336	-1.517	9.54	24.553	53.132	-7.383	14.352	21.296	30.122	-2.001	14.462	23.969	42.89	7.69	12.227	12.047	44.251	0.03	19.118	14.825	40.743	-1.942	9.001	14.424	46.584	3.996	16.311	42.115	25.162	0.039	30.278	22.973	38.561	-0.257	23.378	28.34	44.252	-0.334	15.731	-3.898	-2.738	1.541	16.107	30.995	22.084	0.02
	-3.802	13.07	26.537	30.336	-1.517	9.54	24.553	53.132	-7.383	14.352	21.296	30.122	-2.001	14.462	23.969	44.245	7.69	12.227	12.047	44.251	0.03	19.118	14.825	37.642	-1.942	9.001	14.424	46.584	3.996	16.311	42.115	25.162	0.039	30.278	22.973	29.236	-0.257	23.378	28.34	44.252	-0.334	15.731	-2.622	-2.738	1.541	16.107	30.995	22.084	0.02
	-3.802	13.07	26.537	30.336	-6.476	9.54	24.553	53.132	-7.383	14.352	21.296	30.122	-2.001	14.462	23.969	44.245	7.69	12.227	12.047	44.251	0.03	19.118	14.825	37.642	-1.942	3.754	34.286	46.584	3.996	16.311	39.228	25.162	0.039	30.278	22.973	29.236	-0.257	23.378	28.34	44.252	-0.334	15.731	-2.622	-2.738	1.541	16.107	30.995	22.084	0.02
	-3.802	13.07	41.917	30.336	-6.476	9.54	24.553	29.789	-7.383	14.352	21.296	30.122	-2.001	14.462	23.969	65.855	7.69	12.227	12.047	44.251	0.03	19.118	14.825	37.642	-1.593	3.754	34.286	46.584	3.996	16.311	39.228	33.444	0.039	30.278	22.973	29.236	-0.257	23.378	28.34	44.252	-0.334	15.731	-2.622	22.095	1.541	16.107	30.995	22.084	0.02
	-3.802	13.07	41.917	30.336	-6.476	9.54	24.553	29.789	-7.383	14.352	21.296	30.122	-2.001	14.462	23.969	65.855	7.69	12.227	12.047	44.251	0.03	19.118	14.825	37.642	-1.593	3.754	26.39	46.584	5.893	19.669	39.228	33.444	0.039	30.278	22.973	29.236	-0.257	23.378	28.34	44.252	-0.334	15.731	-2.622	22.095	1.541	16.107	30.995	22.084	0.02
	-3.802	13.07	41.917	30.336	-1.397	9.54	24.553	29.789	-2.676	14.352	21.296	30.122	-2.001	14.462	23.969	65.855	7.69	12.227	12.047	44.251	0.03	19.118	14.825	37.642	-1.593	21.091	26.39	46.584	5.893	19.669	39.228	28.447	0.039	30.278	22.973	29.236	-0.257	23.378	28.34	44.252	-0.334	15.731	-2.622	22.095	1.541	16.107	30.995	22.084	0.02
	-3.802	13.07	41.917	30.336	-1.397	9.54	18.489	29.789	-2.676	14.352	21.296	30.122	-2.001	14.462	23.969	61.793	7.69	12.227	12.047	44.251	0.03	19.118	14.825	37.642	-1.593	21.091	26.39	46.584	7.498	19.669	39.228	28.447	0.039	30.278	22.973	29.236	-0.257	23.378	28.34	44.252	-0.334	15.731	-2.622	22.095	1.541	16.107	30.995	22.084	0.02
	-3.802	13.07	41.917	30.336	-1.397	9.54	18.489	29.789	-2.676	14.352	21.296	30.122	-2.001	14.462	23.969	61.793	7.69	12.227	12.047	44.251	0.03	19.118	14.825	37.642	-1.593	21.091	26.39	46.951	7.498	25.448	39.228	28.447	0.039	30.278	22.973	29.236	-0.257	23.378	28.34	44.252	-0.334	15.731	-2.622	22.095	1.541	16.138	30.995	22.084	0.02
	-3.802	13.07	41.917	30.336	-1.397	9.54	18.489	37.49	-2.676	14.352	21.296	30.122	-2.001	14.462	33.904	61.793	7.69	12.227	12.047	44.251	0.03	19.118	14.825	37.642	-1.593	21.091	26.356	46.951	7.498	25.448	39.228	28.447	0.039	30.278	24.435	29.236	-0.257	23.378	28.34	44.252	-0.334	15.731	-2.622	22.095	1.541	16.138	30.995	22.084	0.02
	-3.802	13.07	26.463	42.812	-1.397	9.54	18.489	37.49	-2.676	14.352	21.296	30.122	-2.001	14.462	33.904	61.793	7.69	12.227	12.047	44.251	0.03	23.303	14.825	37.642	-1.593	21.091	26.356	46.951	-3.398	25.448	39.228	47.756	0.039	30.278	24.435	29.236	-0.257	23.378	28.34	44.252	-0.334	15.731	-2.622	22.095	1.541	11.252	30.995	22.084	0.02
	-3.802	13.07	26.463	42.812	-1.397	9.54	18.489	37.49	-2.676	22.941	21.296	30.122	-2.001	14.462	33.904	53.685	7.69	12.227	12.047	44.251	-5.253	23.303	14.825	37.642	-1.593	21.091	27.428	46.951	-3.398	25.448	39.228	47.756	0.039	30.278	24.435	29.236	-0.257	23.378	28.34	44.252	-0.334	15.731	-2.622	22.095	1.541	11.252	30.995	22.084	0.02
	-3.802	13.07	26.463	37.631	-1.397	9.54	18.489	27.603	-2.676	22.941	21.296	30.122	-2.001	14.462	33.904	53.685	7.69	12.227	29.546	44.251	-5.253	23.303	14.825	37.642	-1.593	21.091	27.428	46.951	-3.398	25.448	39.228	47.756	0.039	30.278	24.435	29.236	-0.257	23.378	28.34	44.252	-0.334	15.731	-2.622	22.095	1.541	11.252	30.995	22.084	0.02
	-3.802	13.07	26.463	37.631	-1.397	9.54	18.489	27.603	5.73	22.941	21.296	30.122	-2.001	14.462	33.904	53.685	7.69	12.227	29.546	44.251	-2.078	23.303	14.825	35.496	-1.593	21.091	27.428	46.951	-3.398	25.448	44.346	54.255	0.039	20.091	24.435	29.236	-0.257	23.378	28.34	44.252	-0.334	15.731	-2.622	22.095	1.541	11.252	30.995	22.084	0.02
	-3.802	13.07	26.463	37.631	-1.397	9.54	18.489	27.603	5.73	22.941	21.296	30.122	-2.001	14.462	33.658	66.772	7.69	12.227	29.546	44.251	-2.078	23.303	13.188	35.496	-1.593	21.091	27.428	46.951	-3.398	25.448	44.346	54.255	0.039	20.091	24.435	29.236	-0.257	23.378	28.34	44.252	-0.334	15.731	-2.622	22.095	1.541	23.91	27.374	-11.677	0.02
	-3.802	13.07	26.463	37.631	-1.397	9.54	18.489	27.603	5.73	22.941	21.296	30.122	-2.001	14.462	33.658	66.772	7.69	12.227	10.531	44.251	-9.246	23.303	13.188	35.496	-1.593	21.091	27.428	46.951	-2.661	25.448	44.346	54.255	0.039	20.091	24.435	29.236	-0.257	23.378	28.34	44.252	-0.334	15.731	-2.622	22.095	1.541	23.91	27.374	-11.677	0.02
	-3.802	13.07	17.948	37.631	-1.397	9.54	18.489	27.603	5.73	22.941	21.296	30.122	-2.001	14.462	33.658	66.772	7.69	12.227	10.531	44.251	-9.246	23.303	13.188	56.243	-1.922	21.091	27.428	46.951	-2.661	25.448	44.346	54.255	0.039	20.091	24.435	29.236	-0.257	23.378	28.34	44.252	-0.334	15.731	-2.622	23.732	1.541	23.91	27.374	-11.677	0.02
	-3.802	13.07	17.948	37.631	-1.397	9.54	18.489	27.603	5.73	22.941	21.296	30.122	-2.001	14.462	33.658	66.772	7.69	12.227	10.531	44.251	-6.546	23.303	13.188	56.243	-1.922	21.091	27.428	46.951	-0.028	25.448	44.346	54.255	0.039	20.091	24.435	29.236	-0.257	23.378	28.34	44.252	-0.334	15.731	-2.622	23.732	1.541	23.91	27.374	-11.677	0.02
	2.444	13.07	17.948	37.631	-1.397	9.54	18.489	27.603	5.73	22.941	21.296	30.122	-2.001	14.462	33.658	66.772	7.69	12.227	10.531	44.251	-6.546	21.001	13.188	56.243	-1.922	21.091	27.428	46.951	-0.028	25.448	44.346	54.255	0.039	14.811	24.435	29.236	-0.257	23.378	28.34	44.252	-0.334	15.731	-2.622	23.732	1.541	7.556	27.374	-6.512	0.02
	2.444	13.07	17.948	37.631	1.097	9.54	18.489	27.603	5.73	22.941	21.296	30.122	-2.001	14.462	33.658	66.772	7.69	12.227	10.531	44.251	-6.546	21.001	13.188	56.243	-1.922	21.091	27.428	46.951	-0.028	25.448	44.346	35.546	0.039	14.811	24.435	37.823	-0.257	23.378	28.34	44.252	-0.334	15.731	-2.622	23.732	1.541	7.556	27.374	-6.512	0.02
	2.444	13.07	17.948	37.631	1.097	9.54	18.489	27.603	5.73	22.941	21.296	30.122	-2.001	14.462	33.658	66.772	7.69	12.227	10.531	44.251	-6.546	21.001	13.188	56.243	-1.922	21.091	27.428	46.951	-0.028	16.418	44.346	35.546	0.039	14.811	24.435	37.823	-0.257	23.378	28.34	44.252	-0.334	15.731	-2.622	23.732	1.541	7.556	27.374	-6.512	0.02
	2.444	13.07	17.948	37.631	1.097	9.54	18.489	27.603	5.73	22.941	21.296	30.122	-2.001	18.504	33.658	66.772	7.69	12.227	10.531	44.251	-6.546	14.3	13.188	56.243	-1.922	14.674	27.428	46.992	-0.028	16.418	44.346	35.546	0.039	14.811	24.435	37.823	-0.257	23.378	28.34	44.252	-0.334	15.731	-2.622	23.732	1.541	7.556	27.374	31.586	0.02
	2.444	13.07	17.948	37.631	1.097	9.54	15.904	27.603	5.73	22.941	21.296	30.122	-2.001	18.504	33.658	66.772	7.69	12.227	10.531	44.251	-6.546	14.3	13.188	56.243	-1.922	14.674	27.428	46.992	-0.028	16.418	44.346	42.913	0.039	14.811	24.435	37.823	-0.257	23.378	28.34	44.252	-0.334	15.731	-2.622	23.732	1.541	7.556	27.374	31.586	0.02
	2.444	13.07	17.948	38.267	1.097	9.54	15.904	27.603	5.73	22.941	21.296	30.122	-2.001	15.361	33.658	66.772	7.69	12.227	10.531	44.251	-6.546	14.3	13.188	56.243	-1.922	14.674	27.428	46.992	-0.028	16.418	44.346	42.913	0.039	14.811	24.435	37.823	-0.257	13.99	28.34	44.252	-0.334	15.731	-2.622	23.732	1.541	7.556	27.374	20.873	0.02
	2.444	13.07	17.948	38.267	1.097	-2.954	15.904	27.603	5.73	22.941	21.296	30.122	-2.001	15.361	33.658	66.772	7.69	12.227	10.531	44.251	-14.089	14.3	13.188	56.243	-1.922	14.674	27.428	44.722	-0.028	16.418	44.346	42.913	0.039	14.811	24.435	37.823	-0.257	13.99	28.34	44.252	-0.334	15.731	-2.622	23.732	1.541	7.556	27.374	20.873	0.02
	2.444	13.07	22.534	31.504	1.097	-2.954	15.904	27.603	5.73	22.941	21.296	30.122	-2.001	15.361	33.658	66.772	7.69	12.227	10.531	44.251	-14.089	5.767	13.188	56.243	-1.922	14.674	27.428	44.722	-0.028	27.935	44.346	42.913	0.039	14.811	24.435	37.823	-1.151	13.99	28.34	44.252	-0.334	15.731	-2.622	23.732	1.541	7.556	27.374	20.873	0.02
	2.444	13.07	22.534	31.504	1.097	-2.954	15.904	27.603	5.73	22.941	21.296	30.122	-2.001	15.361	33.658	57.457	7.69	12.227	10.531	44.251	-14.089	5.767	13.188	56.243	-1.922	14.674	27.428	44.722	-0.028	27.935	44.346	42.913	0.039	25.51	24.435	37.823	-1.151	13.99	28.34	44.252	-0.334	15.731	-2.622	23.732	1.541	7.556	27.374	20.873	0.02
	2.444	13.07	22.534	31.504	1.097	-2.954	15.904	27.603	5.73	22.941	21.296	30.122	-2.001	15.361	33.658	57.457	7.69	12.227	10.531	44.251	-0.573	5.767	13.188	56.243	-1.922	14.674	27.428	44.722	0.093	27.935	44.346	42.913	0.039	25.51	24.435	37.823	-1.151	13.99	28.34	44.252	-0.334	15.731	-2.622	23.732	1.541	7.556	27.374	20.873	0.02
	2.444	13.07	22.534	29.445	1.097	-2.954	16.908	27.603	5.73	22.941	21.296	30.122	-2.001	15.361	24.454	57.457	7.69	12.227	10.531	44.251	-0.573	5.767	13.188	56.243	-1.922	14.674	27.428	44.722	0.093	27.935	44.346	35.373	0.039	25.51	24.435	37.823	-0.424	13.99	28.34	44.252	-0.334	15.731	-2.622	23.732	1.541	7.556	27.374	20.873	0.02
	2.444	13.07	22.534	29.445	1.097	-2.954	16.908	27.603	5.73	22.941	21.296	30.122	-2.001	15.361	24.454	57.457	7.69	12.227	10.531	44.251	-0.573	5.767	13.188	25.088	-1.922	14.674	27.428	44.722	0.093	27.935	44.346	35.373	0.039	26.58	24.435	37.823	-0.424	13.99	28.34	44.252	-0.334	15.731	-2.622	23.732	1.541	7.556	27.374	20.873	0.02
	2.444	13.07	22.534	29.445	1.097	-2.954	16.908	27.603	5.73	22.941	21.296	30.122	-2.001	15.361	24.454	57.457	7.69	12.227	10.531	44.251	-0.573	5.767	13.188	25.088	-1.922	14.674	27.428	44.722	-5.323	27.935	44.346	35.373	0.039	26.58	24.435	36.571	-0.424	13.99	28.34	44.252	-0.334	15.731	-2.622	23.732	1.541	7.556	27.374	20.873	0.02
	2.444	13.07	22.534	29.445	1.097	-2.954	16.908	27.603	5.73	22.941	21.296	30.122	-2.001	15.361	24.454	57.457	7.69	12.227	10.531	44.251	-0.573	5.767	17.151	25.088	-1.922	14.674	27.428	44.722	-5.323	27.935	44.346	35.373	0.039	26.58	24.435	36.571	-0.424	13.99	28.34	44.252	-0.334	15.731	-2.622	23.732	1.541	7.374	27.374	20.873	0.02
	2.444	13.07	22.534	29.445	1.322	-2.954	16.022	27.603	5.73	22.941	21.296	30.122	-2.001	15.361	24.454	46.425	7.69	12.227	10.531	44.251	-0.573	5.767	17.151	25.088	-1.922	14.674	27.428	47.317	-5.323	27.935	44.346	35.373	0.039	26.58	24.435	36.571	-0.424	14.041	28.34	44.252	-0.334	15.731	-2.622	23.732	1.541	7.374	27.374	20.873	0.02
	2.444	13.07	22.534	29.445	1.322	-2.954	16.022	27.603	5.73	22.941	21.296	30.122	-2.001	15.361	24.454	46.425	7.69	12.227	10.531	44.251	-0.573	5.767	17.151	25.088	-1.922	14.674	27.428	47.317	-5.323	27.935	44.346	35.373	0.039	26.294	20.975	36.571	-0.424	14.041	28.34	44.252	-0.334	15.731	-2.622	23.732	1.541	7.374	27.374	20.873	0.02
[truncated: 19,020 more rows]
[truncated: 3 more columns]
