# Supplementary material for: Tracking multiple conformations occurring on angstrom-and-millisecond scales in single amino-acid-transporter molecules
Source: eLife. 2023 Feb 17;12:e82175. doi: 10.7554/eLife.82175 (PMC9937647; doi:10.7554/eLife.82175)
Supplement: Figure 5—source data 2. [file elife-82175-fig5-data2.xlsx]

## Sheet: theta distributions
Theta angles for distributions, by state (s1-s4) and [Arg] = 0 - 5 mM
Arginine (mM)	0				0.002				0.005				0.01				0.02				0.05				0.1				0.2				0.5				0.75				1				3				5
	s1	s2	s3	s4	s1	s2	s3	s4	s1	s2	s3	s4	s1	s2	s3	s4	s1	s2	s3	s4	s1	s2	s3	s4	s1	s2	s3	s4	s1	s2	s3	s4	s1	s2	s3	s4	s1	s2	s3	s4	s1	s2	s3	s4	s1	s2	s3	s4	s1
	83.164	87.919	79.541	85.453	107.777	78.783	53.373	83.847	103.956	83.084	67.963	104.158	75.651	99.301	83.681	93.88	84.374	82.099	50.168	90	94.828	89.685	80.224	85.335	87.156	82.321	72.164	90	91.434	99.051	64.558	89.111	95.687	84.779	51.252	90.8	81.704	92.325	85.269	91.657	80.176	75.471	62.565	79.678	90	81.61	71.56	93.46	88.635
	83.164	87.919	79.541	85.453	107.777	78.783	53.373	83.847	94.736	83.084	67.963	104.158	75.651	99.301	83.681	93.88	94.477	82.099	50.168	90	94.828	89.685	80.224	85.335	87.156	82.321	72.164	90	91.434	99.051	64.558	89.111	95.687	84.779	51.252	90.8	81.704	92.325	85.269	91.657	80.176	75.471	52.334	79.678	90	81.61	71.56	93.46	88.635
	83.164	87.919	79.541	93.029	90.386	78.783	53.373	90.791	94.736	94.835	67.963	104.158	75.651	99.301	83.681	93.88	94.477	84.92	50.168	90	94.828	89.685	80.224	85.335	87.156	82.321	72.164	90	91.434	99.051	64.558	89.111	95.687	84.779	51.252	90.8	82.777	92.325	85.269	91.657	88.347	75.471	52.334	79.678	90	81.61	71.56	93.46	88.635
	83.164	91.878	79.541	93.029	90.386	78.783	53.373	90.791	94.736	94.835	67.963	89.726	75.651	99.301	83.681	93.88	94.477	84.92	50.168	90	94.828	89.685	80.224	85.335	87.156	82.321	72.164	90	99.907	99.051	64.558	89.111	95.687	84.779	51.252	90.8	82.777	92.325	85.269	91.657	88.347	75.471	52.334	97.723	90	78.503	75.201	93.46	88.635
	83.164	91.878	79.541	93.029	90.386	78.783	53.373	90.791	94.736	94.835	67.963	89.726	92.787	101.218	83.681	93.88	94.477	84.92	50.168	90	94.828	89.685	80.224	90.467	87.156	82.321	72.164	90	99.907	99.051	64.558	89.111	95.687	84.779	51.252	90.8	82.777	92.325	85.269	91.657	88.347	75.471	52.334	97.723	91.323	78.503	75.201	93.46	88.635
	83.164	91.878	77.944	82.733	90.386	78.783	53.373	116.541	94.736	94.835	67.963	89.726	92.787	101.218	83.681	93.88	94.477	84.92	50.168	90	94.828	89.685	80.224	90.467	87.156	82.321	72.164	90	99.907	99.051	64.558	89.111	95.687	84.779	51.252	90.8	82.777	92.325	85.269	91.657	88.347	75.471	52.334	97.723	91.323	78.503	75.201	93.46	88.635
	83.164	91.878	77.944	82.733	90.386	78.783	53.373	116.541	94.736	94.835	67.963	97.132	92.787	101.218	83.681	78.542	94.477	84.92	50.168	90	85.597	89.685	80.224	90.467	94.267	82.321	72.164	90	86.229	99.051	64.558	89.111	95.687	84.779	51.252	90.8	82.777	92.325	85.269	85.596	88.347	83.146	52.334	97.723	91.323	93.913	75.201	93.46	88.635
	83.164	91.878	82.932	82.733	79.009	78.783	53.373	116.541	92.061	94.835	77.637	97.132	92.787	90.586	83.681	78.542	94.477	84.92	50.168	90	85.597	89.685	80.224	90.467	94.267	82.321	72.164	90	86.229	99.051	64.558	89.111	95.687	84.779	51.252	90.8	82.777	92.325	85.269	85.596	88.347	69.922	51.997	101.601	91.323	93.913	75.201	93.46	88.635
	83.164	91.878	82.932	83.786	79.009	78.783	53.373	79.786	92.061	94.865	77.637	83.957	92.787	90.586	83.681	78.542	94.477	84.92	50.168	90	85.597	89.685	80.224	90.467	94.267	82.321	72.164	90	86.229	99.051	64.558	89.111	95.687	84.779	51.252	90.8	82.777	92.325	85.269	85.596	94.918	69.922	51.997	101.601	88.236	93.913	75.201	93.46	88.635
	83.164	91.878	87.805	83.786	79.009	78.783	53.373	79.786	92.061	94.865	77.637	83.957	92.787	90.586	73.121	78.542	94.477	84.92	50.168	90	85.597	89.685	80.224	90.467	94.267	82.321	72.164	90	86.229	98.182	64.558	89.111	95.687	84.779	51.252	90.8	82.777	92.325	85.269	85.596	94.918	69.922	51.997	101.601	88.236	93.913	83.381	93.46	88.635
	83.164	91.878	87.805	83.786	79.009	78.783	53.373	79.786	92.061	94.865	77.637	83.957	92.787	105.837	73.121	90.703	94.477	84.92	50.168	90	85.597	89.685	80.224	90.467	88.839	82.321	72.164	90	86.229	98.182	64.558	89.111	95.687	84.779	51.252	90.8	91.017	92.325	85.269	85.596	94.918	69.922	51.997	101.601	88.236	93.913	83.381	93.46	88.635
	83.164	91.878	87.805	83.786	79.009	78.783	53.373	79.786	92.061	94.865	77.637	84.854	92.787	105.837	75.114	90.703	94.477	84.92	50.168	90	85.597	89.685	80.224	90.467	88.839	82.321	72.164	90	86.239	98.182	64.558	89.111	95.687	93.566	51.252	90.8	91.017	92.325	85.269	85.596	94.918	69.922	65.244	101.601	89.069	93.913	83.381	93.46	88.635
	83.164	91.878	87.805	83.786	79.009	78.783	53.373	79.786	92.061	94.865	77.637	79.198	101.584	105.837	75.114	90.703	94.477	84.92	62.311	90	85.597	90.519	80.224	84.61	88.839	82.321	72.164	97.332	86.239	98.182	64.558	89.111	95.687	93.566	51.252	90.8	91.017	92.325	85.269	85.596	94.918	69.922	65.244	101.601	89.069	93.913	83.381	93.46	88.635
	83.164	91.878	87.805	83.786	79.009	78.783	53.373	85.974	92.061	94.865	77.637	79.198	101.584	105.837	74.903	90.703	94.477	84.92	62.311	90	85.597	90.519	80.224	84.61	88.839	82.321	72.164	97.332	86.239	98.182	64.558	89.111	95.687	93.566	51.252	90.8	91.017	91.914	85.269	85.596	94.918	69.922	65.244	101.601	89.069	93.913	83.381	93.46	88.635
	83.164	91.878	87.805	83.786	79.009	78.783	53.373	75.504	92.061	94.865	77.637	79.198	101.584	105.837	74.903	90.703	94.477	84.92	62.311	90	85.597	90.519	80.224	84.61	88.839	82.321	72.164	97.332	86.239	98.182	64.558	89.111	95.687	93.566	51.252	90.8	91.017	91.914	85.269	85.596	86.297	69.922	65.244	79.583	89.069	93.913	83.381	93.46	88.635
	76.264	91.878	87.805	83.786	74.634	78.783	53.373	75.504	92.061	94.865	77.637	93.88	86.655	105.837	74.903	90.703	94.477	84.92	62.311	90	85.597	90.519	80.224	84.61	88.839	85.351	72.164	97.332	90	95.971	64.558	89.111	82.078	93.566	51.252	90.8	91.017	98.261	85.269	85.596	86.297	69.922	65.244	79.583	89.069	93.913	83.381	93.46	88.635
	76.264	91.878	79.825	85.666	74.634	78.783	56.039	75.504	85.464	91.493	77.637	93.88	86.655	105.837	74.903	90.616	94.477	84.92	56.337	90	85.597	90.519	80.224	84.61	88.839	85.351	72.164	97.332	90	95.971	64.558	89.111	82.078	93.566	51.252	90.8	91.017	98.261	85.269	85.596	86.297	69.922	65.244	79.583	89.069	93.913	83.381	93.46	88.635
	107.005	91.878	79.825	85.666	92.323	78.783	56.039	89.002	85.464	91.493	78.497	93.88	86.655	105.837	74.903	90.616	94.477	84.92	56.337	90	85.597	90.519	80.224	92.557	88.839	85.351	72.164	97.332	90	95.971	64.558	89.111	82.078	93.566	51.252	90.8	91.017	98.261	85.269	85.596	86.297	69.922	65.244	79.583	89.069	93.913	83.554	93.46	88.635
	107.005	91.878	79.825	85.666	92.323	78.783	56.039	89.002	85.464	91.493	78.497	93.88	86.655	105.837	74.903	90.616	90.232	84.92	56.337	90	85.597	90.519	80.224	92.557	88.839	88.736	72.164	97.332	90	95.971	64.558	89.111	82.078	93.566	51.252	90.8	91.017	98.261	85.269	85.596	86.297	69.922	67.29	88.735	89.069	96.192	83.554	93.46	88.635
	107.005	91.878	79.825	85.666	92.323	78.783	56.039	84.213	85.464	91.493	60.538	93.88	86.655	96.916	74.903	90.616	90.232	84.92	56.337	90	85.597	90.519	80.224	92.557	88.839	88.736	72.164	89.508	90	102.028	65.623	89.111	82.078	93.566	51.252	90.8	91.017	98.261	85.269	91.395	86.297	69.922	67.29	88.735	89.069	96.192	83.554	93.46	88.635
	110.225	91.878	79.825	85.666	92.323	78.783	64.882	84.213	85.464	91.493	60.538	93.88	86.655	96.916	74.903	90.616	90.232	84.92	59.405	90	85.597	90.519	80.224	92.557	88.839	88.736	72.164	89.508	90	102.028	65.623	89.111	82.078	93.566	51.252	95.95	91.017	98.261	85.269	91.395	86.297	69.922	67.29	88.735	89.069	96.192	83.554	93.46	88.635
	110.225	91.878	79.825	82.515	92.323	78.783	64.882	84.213	85.464	91.493	60.538	93.88	82.735	96.916	74.903	90.616	90.232	89.9	59.405	79.66	85.597	90.519	80.224	92.557	88.839	88.736	72.164	89.508	90	102.028	65.623	89.111	82.078	93.566	51.252	95.95	91.017	92.096	85.269	91.395	86.297	69.922	67.29	88.735	89.069	96.192	83.554	93.46	88.635
	110.225	91.878	79.825	82.515	92.323	78.783	64.882	84.213	85.464	91.493	73.991	93.88	82.735	96.916	74.903	92.05	90.232	89.9	59.405	79.66	85.597	90.519	80.224	92.557	88.839	90.304	72.164	89.508	100.683	102.028	65.623	90.293	82.078	93.566	51.252	77.201	91.017	92.096	85.269	91.395	86.297	69.922	67.29	88.735	89.069	96.192	83.554	93.46	88.635
	110.225	91.878	82.98	82.515	92.323	78.783	64.882	90.925	85.086	91.493	73.991	93.88	82.735	96.916	74.903	92.05	90.232	89.9	59.405	93.568	85.597	90.519	80.224	92.557	88.839	90.304	75.738	89.508	100.683	102.028	65.623	90.293	82.078	93.566	51.252	77.201	91.017	92.096	85.269	91.395	86.297	69.922	67.29	88.735	89.069	96.219	83.554	93.46	88.635
	90.226	91.878	80.274	82.515	92.323	78.783	64.882	90.925	85.086	91.493	73.991	93.88	82.735	96.916	74.903	92.05	90.232	96.45	54.469	93.568	85.597	90.519	80.224	84.694	88.839	90.304	75.738	89.508	100.683	89.216	65.623	96.339	82.078	93.566	51.252	97.544	91.017	92.096	85.269	91.395	86.297	74.48	67.29	88.735	89.069	96.219	83.554	93.46	88.635
	90.226	91.878	80.274	82.515	92.323	78.783	64.882	90.925	85.086	91.493	73.991	93.88	82.735	96.916	74.903	92.05	90.232	96.45	54.469	93.568	85.597	90.519	80.224	84.694	88.839	90.304	75.738	89.508	100.683	89.216	65.623	96.339	82.078	93.566	51.252	97.544	91.017	92.096	85.269	91.395	86.297	74.48	67.29	88.735	89.069	96.219	83.554	93.46	88.635
	90.226	91.878	80.274	82.515	92.323	78.783	64.882	90.925	85.086	91.493	73.991	93.88	82.735	96.916	74.903	92.05	90.232	96.45	54.469	93.568	85.597	90.519	80.224	84.694	88.839	89.191	75.738	89.508	100.683	89.216	65.623	96.339	82.078	93.319	51.252	97.544	91.017	92.096	85.269	91.395	86.297	74.48	67.29	88.735	89.069	96.219	83.554	93.46	88.635
	90.226	91.878	84.583	82.515	95.293	78.783	64.882	90.925	85.086	91.493	73.991	80.409	82.735	96.916	74.903	92.05	90.232	96.45	54.469	94.066	85.597	90.519	80.224	91.832	88.839	89.191	73.744	89.508	95.597	89.216	65.623	84.636	82.078	93.319	51.252	94.917	91.017	92.096	85.269	91.395	86.297	74.48	67.29	98.449	89.069	96.219	83.554	93.46	88.635
	91.056	91.878	84.583	93.091	95.293	78.783	64.882	99.184	85.086	91.493	82.915	80.409	82.735	96.916	74.903	92.05	81.861	96.45	54.469	94.066	85.597	90.519	77.259	91.832	88.839	89.191	73.744	89.508	95.597	89.216	74.828	84.636	82.078	93.319	67.058	94.917	91.017	92.096	85.269	91.395	86.297	74.48	67.29	98.449	89.069	96.219	83.554	93.46	88.635
	91.056	91.878	84.583	93.091	95.293	78.783	64.882	99.184	85.086	91.493	82.915	80.409	82.735	96.916	74.903	92.406	81.861	96.45	54.469	94.066	85.597	90.519	77.259	91.832	88.839	89.191	73.744	89.508	95.597	89.216	74.828	84.636	87.434	93.319	67.058	94.917	92.612	92.096	85.269	91.395	90.373	74.48	67.29	98.449	95.081	96.219	83.554	93.46	88.635
	91.056	91.878	84.583	93.091	95.293	78.783	64.882	99.184	85.086	91.493	82.915	84.026	82.735	96.916	74.903	92.406	81.861	96.45	63.348	94.066	85.597	90.519	77.259	91.832	88.839	89.191	73.744	89.508	95.597	89.216	74.828	84.636	87.434	93.319	78.149	94.917	92.612	92.096	85.269	91.395	90.373	74.48	67.29	88.766	95.081	96.219	83.554	93.46	88.635
	83.043	91.878	84.583	93.091	95.293	78.783	64.882	99.184	85.086	91.493	82.915	84.026	82.735	96.916	65.219	92.406	81.861	96.45	63.348	94.066	85.597	90.519	77.259	91.832	88.839	88.251	73.744	89.508	95.597	89.216	74.828	84.636	90.208	93.319	74.714	81.678	92.612	92.096	85.269	91.395	90.373	74.48	67.29	88.766	95.081	96.219	83.554	89.714	91.036
	83.043	91.878	84.583	93.091	95.293	78.783	64.882	78.762	85.086	91.493	82.915	84.026	82.735	96.916	65.219	92.406	81.861	96.45	63.348	94.066	85.597	89.864	77.259	91.832	88.839	88.251	73.744	89.508	95.597	89.216	74.828	94.468	90.208	93.319	74.714	81.678	92.612	92.096	85.269	91.395	90.373	74.48	67.29	88.766	95.081	96.219	82.911	89.714	91.036
	83.043	91.878	84.583	88.079	91.061	78.783	64.882	78.762	85.086	91.493	82.915	98.559	82.735	96.916	65.219	92.406	81.861	96.45	63.348	83.767	85.188	89.864	77.259	91.832	88.839	88.251	78.879	89.508	95.597	89.216	74.828	94.468	90.208	93.319	74.714	81.678	92.612	92.096	85.269	91.395	72.829	74.48	67.962	88.766	95.081	96.219	82.911	89.714	91.036
	104.03	91.878	81.232	88.079	91.061	78.783	64.882	78.762	85.086	91.493	82.915	98.559	82.735	96.916	50.606	92.406	81.861	92.349	63.348	83.767	85.188	89.864	77.259	91.832	88.839	89.092	78.879	89.508	95.597	89.216	74.828	94.468	90.208	93.319	74.714	81.678	92.612	92.096	85.269	91.395	72.829	74.48	67.962	88.766	95.081	96.219	65.598	89.714	91.036
	104.03	91.878	81.232	88.079	80.611	78.783	64.882	82.215	92.137	91.493	82.915	98.559	82.735	96.916	74.951	92.406	81.861	92.349	63.348	83.767	85.188	89.864	77.259	91.832	88.839	89.092	78.879	89.508	95.597	89.216	74.828	94.468	90.208	93.319	74.714	81.678	92.612	92.096	85.269	91.395	72.829	74.48	67.962	88.766	95.081	96.219	65.598	89.714	91.036
	104.03	91.878	81.232	105.242	80.611	78.783	59.82	82.215	92.137	91.493	82.915	98.559	86.321	96.916	74.951	92.205	86.073	100.971	63.348	90.147	85.188	89.864	77.259	91.832	88.839	91.205	78.879	89.508	88.284	86.08	74.828	94.468	90.208	93.319	74.714	81.678	92.612	92.096	85.269	91.395	117.2	74.48	67.962	88.766	95.081	96.219	65.598	89.714	94.646
	104.03	91.878	81.232	105.242	80.611	78.783	59.82	82.215	92.137	91.493	82.915	98.559	86.321	96.916	74.951	92.205	86.073	100.971	63.348	90.147	85.188	89.864	77.259	91.832	88.839	91.205	78.879	89.508	88.284	86.08	74.828	94.468	90.208	93.319	74.714	81.678	92.612	92.096	85.269	91.395	117.2	74.48	67.962	88.766	79.142	96.219	65.598	89.714	94.646
	104.03	91.878	81.232	81.425	95.804	78.783	59.82	102.053	92.137	91.493	82.915	98.559	92.89	96.916	89.618	82.119	103.125	100.971	73.708	90.147	85.188	89.864	77.259	91.832	88.839	91.205	78.879	89.508	88.284	86.08	74.828	88.91	90.208	93.319	74.714	85.138	92.612	92.096	85.269	91.395	117.2	74.48	67.962	88.766	79.142	89.276	65.598	89.714	94.646
	104.03	91.878	64.463	81.425	95.804	78.783	59.82	102.053	92.137	91.493	82.915	88.781	92.89	96.916	89.618	82.119	103.125	100.971	73.708	90.147	85.188	89.864	77.259	91.832	88.839	91.205	78.879	89.508	88.284	86.08	74.828	88.91	90.208	93.319	74.714	85.138	92.612	92.096	85.269	91.395	117.2	74.48	45.654	88.766	79.142	89.276	65.598	89.714	94.646
	104.03	91.878	64.463	81.425	95.804	78.783	59.82	102.053	92.137	91.493	82.915	88.781	92.89	96.916	86.931	82.119	103.125	76.138	48.944	96.161	85.188	89.864	77.259	91.832	88.839	91.205	78.879	89.508	73.129	93.351	74.828	88.91	90.208	93.319	74.714	85.138	92.612	92.096	85.269	91.395	87.37	74.48	45.654	88.766	92.134	89.276	65.598	89.714	94.646
	104.03	91.878	64.463	81.425	95.804	78.783	59.82	102.053	92.137	91.493	82.915	88.781	82.885	96.916	86.931	91.376	103.125	76.138	48.944	96.161	85.188	89.864	77.259	91.832	88.839	91.205	63.567	89.508	73.129	93.351	74.828	88.91	90.208	93.319	74.714	85.138	92.612	92.096	85.269	91.395	87.37	74.48	63.856	88.766	92.134	89.276	65.598	89.714	94.646
	104.03	91.878	64.463	81.425	95.804	78.783	59.82	72.079	94.976	91.493	82.915	88.781	82.885	96.916	86.931	91.376	103.125	76.138	48.944	96.161	85.188	89.864	77.259	91.832	88.839	91.205	63.205	89.508	73.129	93.351	74.828	88.91	90.208	93.319	72.277	85.138	92.612	92.096	85.269	91.395	87.37	74.48	63.856	88.766	92.134	89.276	79.905	89.714	94.646
	104.03	91.878	86.762	81.425	95.804	78.783	59.82	72.079	94.976	91.493	82.915	88.781	82.885	96.916	86.931	91.376	103.125	76.138	70.42	96.161	85.188	89.864	77.259	91.832	88.839	91.205	63.205	89.508	73.129	93.351	74.828	88.91	90.208	93.319	72.277	85.138	92.612	92.096	85.269	91.395	87.37	74.48	63.856	88.766	92.134	89.276	79.905	89.714	94.646
	104.03	91.878	86.762	83.095	95.804	78.783	59.82	72.079	94.976	91.493	82.915	88.781	82.885	96.916	86.931	91.376	103.125	79.795	70.42	96.161	85.188	89.864	77.259	91.832	88.839	91.205	63.205	89.508	73.129	93.351	63.467	92.179	90.208	93.319	83.166	85.138	92.612	92.096	85.269	91.395	87.37	74.48	71.004	88.766	89.513	89.276	81.975	89.714	95.91
	88.963	91.878	86.762	83.095	95.804	78.783	59.82	80.67	88.915	91.493	82.915	88.781	82.885	96.916	86.931	91.376	103.125	79.795	70.42	84.289	85.188	89.864	77.259	91.832	88.839	91.205	63.205	89.508	73.129	93.351	63.467	92.179	90.208	93.319	83.166	83.073	92.612	92.096	85.269	91.395	93.288	74.48	71.004	88.766	89.513	89.259	81.975	89.714	95.91
	94.364	91.878	86.762	87.912	114.999	78.783	69.83	80.67	88.915	91.493	82.915	88.781	82.885	96.916	87.032	91.376	76.993	79.795	70.42	84.289	85.188	89.864	77.259	91.832	88.839	91.205	63.205	89.508	90.27	84.447	63.467	92.179	90.208	93.319	83.166	83.073	92.612	92.096	85.269	91.395	93.288	74.48	71.004	88.766	89.513	89.259	81.975	89.714	95.91
	94.364	86.66	83.196	87.912	114.999	78.783	69.83	80.67	88.915	91.493	82.915	88.781	82.885	96.916	87.032	91.376	76.993	79.795	70.42	84.289	85.188	89.864	77.259	91.832	88.839	91.205	63.205	89.508	90.27	84.447	63.467	80.51	90.208	93.319	83.166	83.073	92.612	92.096	85.269	91.395	93.288	74.48	71.004	88.766	89.513	89.259	81.975	89.714	95.91
	94.364	86.66	83.196	99.954	114.999	78.783	69.83	80.67	88.915	91.493	82.915	88.781	88.508	99.797	87.032	94.538	76.993	79.795	70.596	84.289	85.188	89.864	77.741	91.832	88.839	91.205	63.205	89.508	90.27	84.447	63.467	80.51	90.208	93.319	83.166	83.073	92.612	92.096	85.269	91.395	93.288	74.48	71.004	88.766	89.513	89.259	49.866	89.714	95.91
	94.364	86.66	83.196	91.393	90.015	78.783	69.83	80.67	88.915	91.493	82.915	88.781	88.508	99.797	87.032	94.538	94.167	79.795	70.596	84.289	87.804	89.864	77.741	91.832	88.839	91.205	60.552	89.508	90.27	84.447	63.467	80.51	90.208	93.319	74.392	83.073	92.612	92.096	85.269	91.395	89.898	74.48	71.004	88.766	89.513	89.259	49.866	89.714	95.91
	94.777	86.66	83.196	91.393	90.015	78.783	69.83	80.67	88.915	91.493	82.915	88.781	88.508	99.797	87.032	94.538	94.167	79.795	70.596	84.289	87.804	89.864	77.741	91.832	88.839	91.205	60.552	89.508	90.27	84.447	63.467	80.51	90.208	93.319	74.392	83.073	94.88	92.096	85.269	91.395	89.898	74.48	71.004	88.766	89.513	89.259	49.866	89.714	95.91
	94.777	86.66	80.833	78.283	90.015	78.783	50.305	92.29	88.915	91.493	82.915	88.781	88.508	93.591	87.032	94.538	94.167	79.795	70.596	84.289	87.804	89.864	77.741	91.832	88.839	91.205	60.552	89.508	90.27	84.447	63.467	80.51	90.208	93.319	74.392	83.073	94.88	92.096	85.269	90.236	89.898	74.48	71.004	88.766	89.513	89.259	49.866	89.714	95.91
	94.777	86.66	80.833	78.283	90.015	78.783	50.305	92.29	88.915	91.493	75.237	88.781	88.508	93.591	87.032	83.625	94.167	79.795	70.596	84.289	87.804	95.876	77.741	91.832	88.839	91.205	60.552	89.508	90.27	84.447	63.467	80.51	90.208	93.319	74.392	96.633	89.721	92.096	85.269	90.236	89.898	74.48	71.004	88.766	89.513	89.259	49.866	89.714	95.91
	94.777	86.66	80.833	101.373	90.015	78.783	47.705	92.29	88.915	91.493	75.237	88.781	88.508	93.591	87.032	83.625	94.167	79.795	70.596	84.289	87.804	95.876	77.741	91.276	88.839	91.205	60.552	89.508	90.27	84.447	63.467	80.51	90.208	93.319	74.392	96.633	89.721	92.096	85.269	90.236	89.898	74.48	61.818	88.766	89.513	89.259	49.866	89.714	95.91
	94.777	86.66	80.833	101.373	90.015	78.783	47.705	92.29	88.915	91.493	75.237	88.781	88.508	93.591	87.032	83.625	94.167	79.795	70.596	84.289	87.804	95.876	77.741	91.276	88.839	91.205	60.552	89.508	90.27	84.447	63.467	80.51	90.208	93.319	74.392	96.633	89.721	92.096	70.987	90.236	89.898	74.48	61.818	88.766	89.513	89.259	68.053	89.714	95.91
	92.219	86.66	75.495	101.373	73.205	78.783	47.705	88.373	88.915	91.493	75.237	88.781	88.508	93.591	85.037	83.625	94.167	79.795	70.596	84.289	87.804	95.876	77.741	91.276	88.839	91.205	60.552	89.508	90.27	84.447	63.467	84.481	90.208	93.319	74.392	96.633	89.721	92.096	70.987	90.236	89.898	74.48	61.818	88.766	86.03	89.259	68.053	89.714	95.91
	92.219	86.66	75.495	101.373	73.205	78.783	58.633	88.373	88.915	91.493	75.237	88.781	88.508	93.591	85.037	97.493	94.167	79.491	70.596	86.341	87.804	95.876	82.788	91.276	88.839	91.205	60.552	89.508	90.27	84.447	63.467	84.481	90.208	93.319	74.392	96.633	89.721	92.096	70.987	90.236	89.898	74.48	61.818	88.766	86.03	89.259	68.053	89.714	95.91
	92.219	86.66	75.495	101.373	95.41	78.783	58.633	88.373	88.915	91.493	75.237	88.781	88.508	93.591	69.974	97.493	84.164	79.491	70.596	86.341	87.804	95.876	82.788	91.276	88.839	91.205	60.552	89.508	90.27	84.447	63.467	84.481	90.208	93.319	74.392	96.633	89.721	92.096	70.987	90.236	87.685	74.48	61.818	88.766	86.03	89.259	64.817	89.714	95.91
	92.219	86.66	70.415	101.373	95.41	77.692	55.661	88.373	88.915	91.493	75.237	88.781	88.508	93.591	69.974	90.287	84.164	79.491	71.338	86.341	87.804	95.876	82.788	91.276	88.839	91.205	60.552	89.508	90.56	81.764	63.467	84.481	90.208	93.319	74.392	96.633	89.721	92.096	70.987	90.236	87.685	74.48	61.818	88.766	86.03	89.259	64.817	89.714	95.91
	92.219	86.66	70.415	101.373	95.41	77.692	55.661	76.201	88.915	91.493	77.164	88.781	88.508	93.591	76.565	90.287	84.164	79.491	71.338	86.341	87.804	95.876	82.788	91.276	88.839	91.205	60.552	89.508	90.56	81.764	63.467	84.481	90.208	93.319	70.547	96.633	89.721	92.096	70.987	90.236	87.685	74.48	61.818	88.766	86.03	89.259	79.734	89.714	95.91
	92.219	86.66	70.415	101.373	78.409	77.692	55.661	76.201	88.915	91.493	77.164	88.781	88.508	92.389	76.565	90.287	84.164	79.491	71.338	86.341	87.804	95.876	82.788	91.276	88.839	91.205	60.552	89.508	90.56	81.764	63.467	84.481	90.208	93.319	70.547	96.633	89.721	92.096	70.987	90.236	87.685	74.48	61.818	88.766	86.03	89.259	79.734	89.714	95.91
	92.219	86.66	70.415	101.373	78.409	77.692	55.661	76.201	88.915	91.493	77.164	88.781	88.508	92.389	76.565	90.287	84.164	79.491	72.624	86.341	87.804	95.876	82.788	91.276	88.839	91.205	60.552	89.508	90.56	81.764	63.467	84.481	90.208	93.319	70.547	96.633	89.721	92.096	83.06	90.236	87.685	74.48	61.818	88.766	86.03	89.954	79.734	89.714	95.91
	81.369	86.66	67.916	101.373	78.409	77.692	55.661	76.201	88.915	91.493	77.164	88.781	88.508	94.138	76.565	90.287	84.164	80.818	72.624	86.341	87.804	95.876	82.788	91.276	88.839	91.205	60.552	89.508	90.56	78.544	63.467	84.481	90.208	93.319	75.918	96.633	89.721	96.423	83.06	90	87.685	74.48	61.818	88.766	86.03	89.954	79.734	89.714	89.742
	81.369	86.66	67.916	101.373	78.409	77.692	55.661	96.713	88.915	91.493	77.164	88.781	88.508	94.138	76.565	90.287	84.164	80.818	82.743	86.341	87.804	95.876	82.788	91.276	88.839	91.205	60.552	89.508	90.56	78.544	63.467	84.481	90.208	93.319	75.918	96.633	89.721	96.423	83.06	90	87.685	74.48	61.818	88.766	86.03	89.954	79.734	89.714	89.742
	87.302	96.866	67.916	101.373	104.72	77.692	54.535	96.713	88.915	91.493	77.164	88.781	88.508	94.138	82.308	90.287	84.164	80.818	82.743	86.341	87.804	95.876	82.788	91.276	88.839	94.778	60.552	89.508	90.56	88.855	63.467	84.481	90.208	93.319	64.721	96.633	89.721	96.423	83.06	90	87.685	74.48	61.818	88.766	86.03	89.954	78.817	89.714	89.742
	87.302	96.866	69.435	99.981	84.64	77.692	54.535	96.713	88.915	91.493	77.164	88.781	90.026	94.138	82.308	90.287	84.164	78.014	82.743	86.341	87.804	95.876	82.788	91.276	88.839	94.778	60.552	89.508	90.56	88.855	63.467	84.481	90.208	93.319	64.721	92.419	89.721	96.423	83.06	90	87.685	74.48	61.818	88.766	86.03	89.954	78.817	89.714	89.742
	87.302	96.866	69.435	99.981	84.64	77.692	54.535	96.713	88.915	91.493	77.164	88.781	90.026	94.138	76.663	90.287	84.164	78.014	82.743	86.341	87.804	95.876	82.788	91.276	88.839	94.778	60.552	89.508	90.56	88.855	63.467	84.481	90.208	93.319	74.583	92.419	89.721	96.423	83.06	98.03	87.685	74.48	61.818	88.766	86.03	89.954	78.817	89.714	89.742
	87.302	96.866	69.435	99.981	84.64	77.692	54.535	96.713	88.915	91.493	77.164	88.781	91.899	94.138	76.663	90.287	84.164	78.014	82.743	86.341	87.804	95.876	82.788	91.276	88.839	94.778	60.552	89.508	90.56	88.855	63.467	84.481	90.208	93.319	74.583	92.419	89.721	96.423	83.06	98.03	87.685	74.48	61.818	88.766	86.03	89.954	78.817	89.714	89.742
	87.302	96.866	72.714	99.981	84.64	77.692	54.535	96.713	88.915	91.493	79.937	88.781	91.899	94.138	77.561	90.287	96.448	78.014	82.743	86.341	87.804	95.876	82.788	91.276	88.839	94.778	65.798	89.508	90.56	88.855	63.467	84.481	90.208	93.319	74.583	92.419	89.721	96.423	85.043	98.03	87.685	74.48	71.915	88.766	86.03	85.918	78.817	89.714	89.742
	87.302	96.866	72.714	99.981	84.64	77.692	54.535	96.713	88.915	91.493	79.937	85.128	91.899	94.138	77.561	90.287	96.448	78.014	85.998	86.341	87.804	95.876	82.788	91.276	88.839	94.778	65.798	89.508	90.56	88.855	63.467	84.481	90.208	93.319	74.583	87.096	89.721	96.423	85.043	92.035	87.685	74.48	71.915	88.766	86.03	85.918	78.817	89.714	89.742
	87.302	96.866	72.714	87.878	90.073	77.692	54.535	111.028	88.915	91.493	79.937	85.128	91.899	94.138	77.561	90.287	96.448	78.014	85.998	86.341	87.804	95.876	82.788	91.276	88.839	94.778	65.798	89.508	90.56	88.855	63.467	84.481	90.208	93.319	74.583	87.096	89.721	96.423	85.043	92.035	87.685	74.48	71.915	88.766	86.03	85.918	78.817	89.714	89.742
	87.302	96.866	72.714	87.878	90.073	77.692	54.535	111.028	88.915	91.493	79.937	85.128	91.899	94.138	77.561	91.459	96.448	78.014	85.998	94.408	87.804	95.876	82.788	91.276	88.839	94.778	65.798	89.508	90.56	83.591	63.467	84.481	90.208	93.319	72.362	87.096	89.721	96.423	85.043	92.035	87.685	74.48	74.459	89.381	86.03	85.918	78.817	89.714	89.742
	87.302	96.866	72.714	87.878	90.073	77.692	54.535	111.028	88.915	91.493	79.937	89.607	91.899	96.821	77.561	91.459	96.448	78.014	85.998	94.408	87.804	95.876	82.788	91.276	88.839	77.366	65.798	89.508	90.56	92.897	63.467	84.481	90.208	93.319	72.362	87.096	89.721	96.423	85.043	92.035	87.685	74.48	74.459	89.381	86.03	85.918	65.717	89.714	89.742
	87.302	96.866	72.714	93.064	56.568	77.692	54.535	94.349	88.915	94.196	79.937	89.607	91.899	96.821	77.561	91.459	81.203	78.014	88.439	94.408	87.804	95.876	82.788	91.276	88.839	77.366	65.798	89.508	90.56	92.897	63.467	84.481	90.208	93.319	72.362	87.096	89.721	96.423	85.043	92.035	87.685	74.48	74.459	89.381	86.03	77.446	65.717	89.714	89.742
	87.302	96.866	72.714	93.064	56.568	77.692	54.535	94.349	88.915	94.196	79.937	89.607	91.899	96.821	85.062	91.459	81.203	78.014	88.439	94.408	87.804	95.876	82.788	91.276	88.839	77.366	65.798	89.508	90.56	80.878	63.467	84.481	90.208	93.319	72.362	87.096	89.721	96.423	85.043	92.035	87.685	74.48	74.459	89.381	86.03	77.446	65.717	89.714	89.742
	87.302	96.866	72.714	93.064	56.568	77.692	54.535	82.914	88.915	94.196	79.937	89.607	91.899	96.821	85.062	91.459	81.203	78.014	88.439	94.408	87.804	95.876	82.788	91.276	88.839	94.202	63.107	89.508	90.56	80.878	50.733	84.481	90.208	93.319	72.362	87.096	89.721	96.423	85.043	92.035	94.541	74.48	81.901	89.258	86.03	77.446	65.717	89.714	89.742
	87.302	96.866	72.714	93.064	56.568	77.692	54.535	82.914	88.915	94.196	79.937	89.607	91.899	96.821	75.812	91.459	81.203	78.014	88.439	94.408	87.804	95.876	82.788	91.276	88.839	94.202	63.107	89.508	90.56	80.878	50.733	84.481	90.208	93.319	72.362	87.096	89.721	96.423	85.043	92.035	94.541	74.48	81.901	89.258	86.03	77.446	65.717	89.714	89.742
	83.285	96.866	72.714	93.064	100.146	77.692	65.449	82.914	88.915	94.196	79.937	89.607	91.899	96.821	75.812	91.459	81.203	78.014	88.439	94.408	87.804	95.876	83.176	91.276	88.839	94.202	63.107	89.508	90.56	80.878	50.733	84.481	90.208	93.319	72.362	87.096	89.721	96.423	85.043	88.922	94.541	74.48	81.901	89.258	86.03	77.446	65.717	89.714	89.742
	83.285	96.866	74.944	93.064	100.146	77.692	65.449	82.914	88.915	94.196	79.937	89.607	91.899	96.821	75.812	91.459	81.203	78.014	80.863	94.408	87.804	95.876	83.176	91.276	88.839	94.202	63.107	89.508	90.56	80.878	50.733	92.698	90.208	93.319	72.362	87.096	89.721	96.423	85.043	88.922	94.541	74.48	81.901	89.258	86.03	77.446	73.807	89.714	89.742
	83.285	96.866	74.944	93.064	100.146	77.692	60.348	102.192	88.915	94.196	79.937	91.255	91.899	96.821	75.812	91.459	81.203	78.014	80.863	94.408	87.804	95.876	83.176	91.276	88.839	94.202	61.528	89.508	90.56	80.878	50.733	92.698	90.208	93.319	72.362	87.096	89.721	96.423	85.043	88.922	94.541	74.48	81.901	89.258	86.03	77.446	73.807	89.714	89.742
	83.285	96.866	74.944	93.064	97.444	77.692	60.348	102.192	88.915	94.196	79.937	91.255	91.899	96.821	75.812	73.889	81.203	78.014	80.863	94.408	87.804	95.876	83.176	91.276	88.839	94.202	61.528	89.508	90.56	80.878	50.733	92.698	90.208	93.319	72.362	98.208	89.721	96.423	85.043	88.922	94.541	95.984	81.901	89.258	86.03	77.446	73.807	89.714	81.979
	83.285	96.866	74.944	93.064	97.444	77.692	60.348	102.192	88.915	94.196	79.937	91.255	91.899	96.821	75.812	73.889	81.203	78.014	80.863	94.408	87.804	95.876	83.176	91.276	88.839	94.202	61.528	89.508	90.56	80.878	50.733	92.698	90.208	93.319	72.362	98.208	89.721	96.423	85.043	88.922	94.541	95.984	81.295	89.258	86.03	77.446	73.807	89.714	81.979
	83.285	96.866	74.944	93.064	96.31	77.692	60.348	102.192	88.915	94.196	79.937	89.493	91.899	96.821	75.812	96.784	92.413	78.014	80.863	99.639	87.804	95.876	83.176	91.276	88.839	94.202	61.528	89.508	90.56	80.878	50.733	92.698	90.208	93.319	72.362	98.208	89.721	96.423	85.043	88.922	94.541	90.696	81.295	89.258	86.03	77.446	73.807	89.714	81.979
	83.285	96.866	74.944	93.064	96.31	77.692	63.535	102.192	88.915	94.196	79.937	89.493	96.089	96.821	75.812	96.784	92.413	78.014	80.863	99.639	87.804	95.876	83.176	91.276	88.839	94.202	61.528	89.508	90.56	80.878	50.733	92.698	90.208	93.319	72.362	98.208	89.721	96.423	85.043	88.922	94.541	90.696	87.066	89.258	86.03	77.446	71.256	89.714	81.979
	72.962	96.866	87.045	93.064	96.31	77.692	63.535	101.727	88.915	94.196	79.937	91.816	96.089	96.821	75.812	96.784	92.413	78.014	80.863	99.639	87.804	95.876	83.176	91.276	88.839	94.202	61.528	89.508	90.56	80.878	50.733	92.698	90.208	93.319	72.362	98.208	89.721	96.423	85.043	88.922	94.541	90.696	87.066	89.258	86.03	77.446	71.256	89.714	81.979
	72.962	96.866	87.045	93.064	96.31	77.692	63.535	101.727	88.915	94.196	79.937	91.816	96.089	96.821	75.812	96.784	92.413	78.014	80.863	99.639	87.804	95.876	83.176	91.276	88.839	94.202	61.528	89.508	90.56	80.878	50.578	92.698	90.208	93.319	72.362	98.208	89.721	96.423	85.043	88.922	89.038	90.696	87.066	89.258	86.03	77.446	71.256	89.714	81.979
	72.962	98.081	81.017	93.064	96.31	77.692	63.535	101.727	88.915	94.196	79.937	91.816	96.089	96.821	75.812	96.784	92.413	78.014	83.663	86.907	87.804	95.876	83.176	91.276	88.839	94.202	61.528	89.508	90.56	80.878	50.578	92.698	90.208	93.319	72.362	98.208	89.721	96.423	85.043	88.922	89.038	90.696	87.066	89.258	86.03	87.675	71.815	89.714	81.979
	72.962	98.081	81.017	93.064	101.808	77.692	44.626	90	88.915	94.196	79.937	91.816	96.089	95.683	75.812	96.784	82.939	78.014	83.663	86.907	87.804	95.876	77.628	91.276	88.839	94.202	61.528	89.508	90.56	80.878	50.578	92.698	90.208	93.319	72.362	98.208	76.97	96.423	85.043	88.922	89.038	90.696	87.066	89.258	86.03	87.675	71.815	89.714	81.979
	72.962	98.081	81.017	93.064	101.808	77.692	44.626	90	88.915	94.196	79.937	91.816	96.089	95.683	75.812	90.284	82.939	78.014	87.828	86.907	87.804	95.876	77.628	91.276	88.839	83.294	61.528	89.508	90.56	80.878	50.578	92.698	90.208	93.319	72.362	98.208	76.97	96.423	85.043	88.922	86.543	90.696	87.066	89.258	86.03	87.675	71.815	89.714	81.979
	72.962	98.081	74.49	93.064	101.808	77.692	44.626	90	88.915	94.196	79.937	91.816	96.089	95.683	75.812	90.284	82.939	78.014	87.828	86.907	87.804	95.876	77.628	91.276	88.839	83.294	61.528	89.508	80.552	80.878	50.578	92.698	90.208	93.319	72.362	98.208	76.97	96.423	85.043	88.922	86.543	90.696	87.066	89.258	86.03	87.675	71.815	89.714	90.063
	72.962	92.488	74.49	89.251	96.731	77.692	44.626	90	88.915	94.196	79.937	91.816	96.089	95.683	75.812	80.295	94.886	78.014	87.828	86.907	87.804	95.876	77.628	91.276	88.839	83.294	61.528	89.508	80.552	80.878	50.578	92.698	90.208	93.319	72.362	98.208	89.482	96.423	85.043	88.922	86.543	90.696	87.066	89.258	80.011	87.675	71.815	89.714	90.063
	72.962	92.488	74.49	89.251	96.731	68.672	44.626	86.839	88.915	94.196	79.937	91.816	96.089	95.683	75.812	80.295	94.886	78.014	87.828	86.907	87.804	95.876	77.628	91.276	88.839	83.294	88.284	89.508	80.552	80.878	50.578	92.698	90.208	93.319	72.362	93.866	89.482	96.423	85.043	88.922	86.543	90.696	87.066	89.258	80.011	87.675	71.815	89.714	90.063
	72.962	92.488	64.681	89.251	96.731	68.672	44.626	86.839	88.915	94.196	79.937	91.816	96.089	95.683	75.812	91.093	94.886	78.014	87.828	86.907	87.804	95.876	77.628	91.276	88.839	83.294	88.284	74.442	88.568	80.878	50.578	92.698	90.208	93.319	72.362	93.866	89.482	96.423	85.043	88.922	86.543	78.888	87.066	89.258	80.011	87.675	71.815	89.714	90.063
	72.962	92.488	64.681	89.251	96.731	77.135	44.626	86.839	88.915	94.196	79.937	91.816	96.089	95.683	75.812	91.093	89.832	78.014	87.828	86.907	87.804	95.876	77.628	91.276	88.839	83.294	88.284	74.442	88.568	80.878	50.578	92.698	90.208	93.319	72.362	93.866	96.177	96.423	85.043	88.922	86.543	78.888	87.066	89.258	80.011	87.675	71.815	89.714	87.083
	72.962	92.488	64.681	89.251	96.731	77.135	54.605	86.839	102.086	94.196	79.937	91.816	96.089	95.683	75.812	91.093	89.832	78.014	87.828	86.907	87.804	95.876	77.628	102.914	88.839	83.294	88.284	74.442	88.568	80.878	50.578	92.698	90.208	93.319	72.362	93.866	96.177	96.423	85.043	88.922	86.543	78.888	87.066	89.258	93.927	87.675	71.815	89.714	87.083
	72.962	92.488	64.681	89.251	87.83	77.135	54.605	86.839	102.086	94.196	79.937	91.816	96.089	95.683	75.812	91.093	89.832	78.014	87.828	86.907	87.804	95.876	77.628	102.914	88.839	83.294	94.134	79.127	88.568	83.455	50.578	92.698	90.208	93.319	72.362	93.866	96.177	96.423	85.043	88.922	86.543	78.888	87.066	89.258	93.927	87.675	71.815	89.714	77.899
	72.962	92.488	64.681	89.251	87.83	77.135	54.605	86.839	102.086	94.196	70.933	91.816	96.089	95.683	75.812	91.093	89.832	78.014	87.828	86.907	87.804	95.876	77.628	83.693	88.839	83.294	94.134	79.127	88.568	83.455	50.578	92.698	90.208	93.319	72.362	93.866	96.177	96.423	85.043	88.922	86.543	78.888	87.066	89.258	93.927	87.675	71.815	89.714	77.899
	72.962	92.488	64.681	89.251	87.83	77.135	54.605	86.839	91.91	94.196	70.933	91.816	96.089	95.683	75.812	91.093	89.832	78.014	87.828	86.907	87.804	95.876	82.18	83.693	88.839	83.294	101.168	79.127	88.568	80.673	50.578	92.698	90.208	93.319	72.362	93.866	90.869	96.423	85.043	88.922	86.543	78.888	87.066	89.258	93.927	87.675	71.815	89.714	90
	87.918	92.488	64.681	89.251	87.83	77.135	54.605	86.839	91.91	94.196	70.933	91.816	96.089	95.683	75.812	91.093	89.832	78.014	87.828	86.907	87.804	95.876	82.18	83.693	88.839	83.294	101.168	79.127	88.568	80.673	50.578	92.698	90.208	93.319	72.362	93.866	90.869	96.423	85.043	88.922	86.543	78.888	87.066	89.258	93.927	87.675	71.815	89.714	90
	87.918	92.488	64.681	89.251	87.83	77.135	54.605	86.839	91.91	94.196	70.933	91.816	96.089	95.683	75.812	91.093	89.832	78.014	87.828	86.907	87.804	95.876	82.18	83.693	88.839	83.294	101.168	79.127	88.568	80.673	50.578	92.698	90.208	93.319	72.362	93.866	90.869	96.423	85.043	88.922	86.543	78.888	87.066	89.258	93.927	87.675	71.815	89.714	90.438
	87.918	92.488	64.681	89.251	87.83	72.844	54.605	86.839	91.91	94.196	70.933	91.816	96.089	95.683	75.812	91.093	89.832	78.014	87.828	86.907	87.804	95.876	82.18	83.693	88.839	83.294	101.168	79.127	88.568	80.673	61.811	92.698	90.208	93.319	72.362	93.866	90.869	96.423	85.043	88.922	86.543	78.888	87.066	89.258	93.927	87.675	71.815	89.714	90.438
	87.918	92.488	74	89.251	87.83	72.844	54.605	86.839	91.91	94.196	70.933	91.816	96.089	95.683	75.812	91.093	89.832	78.014	87.828	86.907	93.272	95.876	82.18	83.693	88.839	83.294	101.168	100.582	89.787	80.673	61.811	92.698	90.208	93.319	74.471	93.866	90.869	91.649	85.043	88.922	86.543	78.888	87.066	89.258	93.927	87.675	71.815	89.714	90.438
	87.918	92.488	74	89.251	87.83	72.844	54.605	86.839	91.91	94.196	70.933	91.816	96.089	95.683	75.812	91.093	89.832	78.014	87.828	86.907	93.272	95.876	82.18	83.693	88.839	83.294	101.168	100.582	89.787	80.673	61.811	92.698	90.208	93.319	74.471	85.991	90.869	91.649	85.043	88.922	86.543	78.888	87.066	89.258	93.927	87.675	71.815	89.714	93.825
	87.918	92.488	74	89.251	87.83	78.425	54.605	86.839	91.91	94.196	70.933	91.816	96.089	95.683	84.372	91.093	89.832	78.014	87.828	86.907	93.272	95.876	82.18	83.693	88.839	83.294	101.168	100.582	89.787	80.141	61.811	92.698	90.217	93.319	74.471	85.991	90.869	91.649	85.043	88.922	86.543	78.888	87.066	89.258	93.927	87.675	71.815	89.714	93.825
	87.918	92.488	77.359	89.251	87.83	78.425	54.605	86.839	91.91	94.196	70.933	91.816	96.089	95.683	84.372	91.093	88.267	78.014	87.828	98.383	93.272	95.876	82.18	83.693	88.839	83.294	101.168	100.582	89.787	80.141	61.811	92.698	90.217	93.319	80.762	85.991	90.869	91.649	85.043	88.922	86.543	78.888	87.066	89.258	93.927	87.675	71.815	89.714	93.825
	87.918	92.488	77.359	89.251	87.83	78.425	64.786	86.839	91.91	94.196	70.933	91.816	96.089	95.683	84.372	91.093	88.267	78.014	87.828	98.383	93.272	95.876	82.18	85.128	88.839	83.294	101.168	100.582	89.787	80.141	61.811	92.698	90.217	93.319	80.762	91.758	90.869	91.649	85.043	88.922	91.433	78.888	87.066	89.258	88.717	87.675	71.815	89.714	93.825
	87.918	92.488	77.359	89.251	94.148	78.425	64.786	86.839	87.662	94.196	70.933	91.816	96.089	95.683	84.372	91.093	88.267	78.014	87.828	98.383	93.272	95.876	82.18	85.128	88.839	83.294	101.168	100.582	89.787	80.141	61.811	92.698	90.217	93.319	80.762	91.758	90.869	91.649	85.043	85.257	91.433	80.846	87.066	89.258	88.717	74.281	71.815	89.714	93.825
	87.918	92.488	77.359	89.251	94.148	78.425	64.786	86.839	87.662	94.196	70.933	91.816	96.089	95.683	84.372	91.093	88.267	78.014	87.828	86.519	93.272	95.876	82.18	85.128	88.839	83.294	101.168	106.503	89.787	80.141	61.811	92.698	90.217	93.319	80.762	83.395	90.869	91.649	79.182	85.257	91.433	80.846	87.066	89.258	88.717	74.281	71.815	89.714	93.825
	87.918	92.488	96.187	89.251	94.148	78.425	64.786	86.839	85.774	94.196	70.933	91.816	96.089	95.683	84.372	91.093	88.267	78.014	87.828	86.519	93.272	95.876	82.18	85.128	88.839	83.294	101.168	106.503	89.787	80.141	61.811	92.698	90.217	93.319	80.762	83.395	90.869	91.649	79.182	85.257	91.433	80.846	87.066	89.258	88.717	74.281	71.815	89.714	77.784
	87.918	92.488	96.187	89.251	93.945	78.425	64.786	86.839	85.774	94.196	70.933	91.816	96.089	95.683	84.372	91.093	88.267	78.014	87.828	86.519	93.272	95.876	82.18	85.128	88.839	83.294	101.168	86.583	89.787	80.141	61.811	92.698	90.217	93.319	61.655	83.395	90.869	91.649	79.182	85.257	91.433	80.846	87.066	89.258	88.717	74.281	71.815	89.714	77.784
	87.918	92.488	96.187	89.251	93.945	78.425	64.786	86.839	85.774	94.196	70.933	91.816	96.089	95.683	84.372	91.093	88.267	78.014	87.828	86.519	93.272	95.876	82.18	85.128	88.839	83.294	101.168	86.583	89.787	80.141	61.811	92.698	90.217	93.319	61.655	83.395	90.869	91.649	79.182	85.257	91.433	80.846	87.066	89.258	88.717	74.281	71.815	89.714	89.538
	87.918	92.488	96.187	89.251	93.945	78.425	64.786	86.839	85.774	94.196	70.933	87.236	96.089	95.683	83.399	91.093	100.29	78.014	87.828	86.519	93.272	95.876	74.487	85.128	88.839	83.294	101.168	86.583	89.787	80.141	61.811	92.698	90.217	93.319	61.655	83.395	90.869	91.649	80.313	85.257	91.433	80.846	87.066	89.258	88.717	74.281	71.815	89.714	89.538
	87.918	92.488	96.187	89.251	93.945	78.425	64.786	86.839	82.89	94.196	72.209	87.236	91.852	95.683	83.399	91.093	100.29	78.014	87.828	86.519	93.272	95.876	74.487	100.815	88.839	83.294	101.168	86.583	89.787	80.141	61.811	92.698	90.217	93.319	61.655	83.395	90.869	91.649	80.313	85.257	91.433	80.846	87.066	89.258	88.717	74.281	71.815	89.714	89.538
	87.918	92.488	96.187	89.251	93.945	78.425	64.786	86.839	82.89	94.196	72.209	87.236	91.852	95.683	83.399	91.093	88.687	78.014	87.828	86.519	93.272	95.876	74.487	100.815	88.839	83.294	101.168	86.583	89.787	80.141	61.811	92.698	90.217	93.319	67.122	83.395	90.869	91.649	80.313	85.257	91.433	80.846	87.066	89.258	88.717	74.281	71.815	89.714	94.458
	87.918	92.488	96.187	89.251	93.945	78.425	64.786	86.839	82.89	94.196	70.971	87.236	91.852	95.683	83.399	91.093	88.687	78.014	94.999	86.519	93.272	95.876	74.487	100.815	88.839	83.294	87.002	86.583	89.787	80.141	65.304	92.698	90.217	93.319	67.122	83.395	90.869	91.649	80.313	85.257	91.433	87.258	87.066	89.258	88.717	74.281	71.815	89.714	94.458
	87.918	92.488	96.187	89.251	93.945	78.425	64.786	86.839	82.89	94.196	70.971	87.236	91.852	95.683	83.399	91.093	88.687	78.014	94.999	86.519	93.272	95.876	74.487	100.815	88.839	83.294	87.002	86.583	89.787	80.141	65.304	92.698	90.217	93.319	67.122	83.395	89.167	91.649	80.313	93.057	91.433	87.258	87.066	89.258	88.717	74.281	71.815	89.714	94.458
	87.918	92.488	96.187	89.251	80.763	78.425	64.786	86.839	82.89	94.196	77.843	89.041	78.299	95.683	84.264	91.093	88.687	78.014	94.999	86.519	93.272	95.876	74.487	100.815	88.839	83.294	87.002	91.364	89.787	80.141	65.304	92.698	87.52	93.319	67.122	83.395	89.167	91.649	84.319	93.057	91.433	87.258	87.066	89.258	88.717	74.281	71.815	89.714	94.458
	87.918	92.488	96.187	89.251	80.763	78.425	64.786	86.839	82.89	94.196	77.843	89.041	78.299	92.922	84.264	91.093	80.363	78.014	78.493	86.519	93.272	95.876	74.487	81.839	88.839	83.294	87.002	91.364	89.787	80.141	61.435	92.698	87.52	93.319	67.122	83.395	89.167	91.649	84.319	93.057	91.433	87.258	87.066	89.258	88.717	74.281	71.815	89.714	94.458
	87.918	92.488	96.187	89.251	80.763	78.425	64.786	86.839	90.668	92.462	77.843	89.041	78.299	92.922	84.264	91.093	80.363	78.014	78.493	87.668	93.272	95.876	74.487	81.839	88.839	83.294	87.002	91.364	89.787	80.141	61.435	92.698	87.52	93.319	67.122	83.395	89.167	91.649	84.319	93.057	91.433	87.258	87.066	89.258	88.717	74.281	71.815	89.714	92.092
	87.918	92.488	96.187	89.251	94.216	78.425	64.786	86.839	90.668	92.462	77.843	89.041	78.299	92.922	91.731	91.093	80.363	78.014	78.493	87.668	93.272	95.876	74.487	81.839	88.839	83.294	87.002	91.364	89.787	73.666	61.435	92.698	87.52	93.319	67.122	83.395	89.167	91.649	84.319	93.057	91.433	87.258	87.066	89.258	88.717	74.281	71.815	89.714	92.092
	87.918	92.488	96.187	89.251	94.216	78.425	64.786	86.839	90.668	92.462	77.843	89.041	78.299	92.922	91.731	91.093	80.363	78.014	78.493	87.668	93.272	95.876	74.487	81.839	88.839	83.294	87.002	91.364	89.787	73.666	61.435	92.698	87.52	93.319	67.122	83.395	89.167	91.649	84.319	93.057	91.433	87.258	87.066	89.258	88.717	89.742	71.815	89.714	86.19
	87.918	92.488	96.187	89.251	94.216	78.425	64.786	86.839	90.668	92.462	75.603	89.041	78.299	92.922	91.731	91.093	80.363	78.014	78.493	87.668	93.272	91.213	74.487	81.839	88.839	83.294	87.002	91.364	89.787	73.666	61.435	92.698	87.52	93.319	67.122	83.395	89.167	91.649	84.319	93.057	91.433	87.258	87.066	89.258	88.717	89.742	71.815	89.714	86.19
	87.918	96.083	96.187	89.251	94.216	78.425	64.786	86.839	90.668	92.462	75.603	89.041	78.299	92.922	91.731	91.093	86.18	78.014	78.493	87.668	93.272	91.213	74.487	81.839	88.839	83.294	87.002	91.364	89.787	67.611	61.435	92.698	87.52	93.319	67.122	83.395	89.167	91.649	84.319	93.057	91.433	87.258	87.066	89.258	88.717	93.398	71.815	89.714	87.09
	87.918	96.083	96.187	89.251	94.216	78.425	64.786	86.839	90.668	92.462	75.603	89.041	78.299	92.922	91.731	91.093	86.18	78.014	78.493	87.668	93.272	91.213	74.487	85.568	88.839	83.294	73.935	91.364	89.787	67.611	61.435	92.698	87.52	93.319	67.122	83.395	89.167	91.649	84.319	93.057	91.433	87.258	87.066	89.258	88.717	93.398	71.815	89.714	87.09
	87.918	96.083	96.187	89.251	94.216	78.425	64.786	86.839	90.668	92.462	74.64	89.041	78.299	92.922	91.731	91.093	86.18	78.014	78.493	101.921	93.272	91.213	74.487	85.568	90.011	83.294	73.935	91.364	89.787	72.534	61.435	92.698	87.52	93.319	67.122	83.395	84.867	91.649	84.319	93.057	91.433	87.258	87.066	89.258	88.717	93.398	71.815	89.714	87.09
	87.918	96.083	96.187	89.251	94.216	78.425	64.786	86.839	90.668	92.462	74.64	89.041	78.299	92.922	91.731	91.093	86.18	78.014	87.412	101.921	93.272	91.213	74.487	85.568	90.011	83.294	65.182	91.364	89.787	72.534	61.435	92.698	87.52	93.319	67.122	83.395	84.867	91.649	84.319	93.057	91.433	87.258	87.066	89.258	88.717	93.398	71.815	89.714	87.09
	87.918	96.083	96.187	89.251	94.216	78.425	64.786	86.839	90.668	92.462	74.64	89.041	78.299	92.922	91.731	91.093	86.18	78.014	87.412	101.921	93.272	91.213	74.487	85.568	90.011	83.294	65.182	91.364	89.787	72.794	61.435	92.698	87.52	93.319	67.122	83.395	84.867	91.649	84.319	95.721	91.433	87.258	87.066	89.258	88.717	91.42	71.815	89.714	87.09
	87.918	96.083	96.187	89.251	87.425	78.425	73.191	86.839	90.668	92.462	74.64	89.041	95.581	92.922	91.731	91.093	86.18	78.014	71.357	101.921	93.272	91.213	81.376	85.568	90.011	83.294	65.182	91.364	89.787	72.794	61.435	92.698	87.52	93.319	67.122	83.395	84.867	91.649	84.319	95.721	91.433	87.258	87.066	89.258	88.717	91.42	71.815	89.714	87.09
	87.918	96.083	96.187	89.251	87.425	78.425	73.191	86.839	90.668	92.462	74.64	89.041	95.581	92.922	91.731	91.093	86.18	78.014	71.357	101.921	93.272	91.213	81.376	85.568	90.011	83.294	65.182	91.364	89.787	72.794	61.435	92.698	87.52	93.319	67.122	80.394	84.867	91.649	84.319	95.721	91.433	87.258	83.312	89.258	88.717	91.42	74.828	89.714	102.414
	87.918	96.083	96.187	89.251	87.425	78.425	70.865	86.839	90.668	92.462	74.64	89.041	86.458	94.71	91.731	91.093	90.537	78.014	71.357	101.921	93.272	91.213	81.376	85.568	90.011	83.294	65.182	91.364	89.787	72.794	61.435	92.698	87.52	93.319	67.122	80.394	91.143	91.649	84.319	95.721	91.433	87.258	83.312	89.258	88.717	91.42	74.828	89.714	102.414
	87.918	96.083	96.187	89.251	87.425	78.425	70.865	86.839	90.668	92.462	74.64	89.041	86.458	94.71	91.731	91.093	90.537	78.679	71.357	101.921	93.272	91.213	81.376	85.568	90.011	83.294	65.182	91.364	89.787	72.794	61.435	92.698	87.52	93.319	67.122	91.955	91.143	91.649	84.319	95.721	91.433	87.258	83.312	89.258	88.717	91.42	74.828	89.714	102.414
	87.918	96.083	96.187	89.251	87.425	78.425	70.865	86.839	90.668	92.462	74.64	89.041	86.458	94.71	91.731	91.093	90.537	78.679	74.848	94.028	93.272	91.213	81.376	85.568	90.011	83.294	65.182	91.364	94.221	72.794	61.435	92.698	87.52	93.319	67.122	91.955	91.143	91.649	84.319	95.721	91.433	87.258	83.312	89.258	88.717	91.42	79.773	89.714	102.414
	87.918	96.083	96.187	89.251	87.425	78.425	70.865	86.839	90.668	92.462	74.64	89.041	86.458	94.71	91.731	91.093	90.537	78.679	74.848	94.028	93.272	91.213	81.376	85.568	90.011	83.294	65.182	91.364	94.221	72.794	61.435	92.698	87.52	93.319	67.122	80.678	87.46	91.649	84.319	95.721	91.433	87.258	83.312	89.258	88.717	91.42	79.773	89.714	102.414
	87.918	96.083	96.187	89.251	87.425	78.425	70.865	86.839	90.668	92.462	74.64	89.041	86.458	94.71	91.731	91.093	90.537	78.679	74.848	94.028	93.272	91.213	81.376	85.568	90.011	83.294	65.182	91.364	94.221	72.794	61.435	92.698	87.52	93.319	67.122	80.678	87.46	91.649	84.319	95.721	91.433	87.258	83.312	89.258	88.717	91.42	79.773	89.714	102.414
	87.918	96.083	96.187	89.251	87.425	78.425	70.171	86.839	90.668	92.462	74.64	89.041	86.458	94.71	91.731	91.093	96.461	78.679	74.848	94.028	93.272	91.213	81.376	85.568	90.011	83.294	65.182	94.79	94.221	72.794	61.435	92.698	87.52	93.319	67.122	92.199	87.46	91.649	86.475	95.721	91.433	87.258	83.312	89.258	88.717	91.42	79.773	89.714	102.414
	87.918	96.083	96.187	89.251	87.425	78.425	70.171	86.839	90.668	92.462	74.64	89.041	86.458	94.71	91.731	91.093	96.461	78.679	74.848	94.028	93.272	91.213	81.376	85.568	90.011	83.294	65.182	94.79	94.221	72.794	61.435	92.698	87.52	93.319	67.122	92.199	87.46	91.649	86.475	95.721	91.433	87.258	83.312	89.258	88.717	91.42	79.773	89.714	102.414
	87.918	96.083	96.187	89.251	82.472	78.425	70.171	86.839	90.668	92.462	74.64	89.041	86.458	94.71	91.731	91.093	96.461	78.679	74.848	94.028	93.272	91.213	81.376	85.568	90.011	83.294	65.182	94.79	94.221	72.794	61.435	92.698	87.52	93.319	67.122	92.199	87.46	91.649	76.857	95.721	91.433	87.258	83.312	89.258	88.717	91.42	79.773	89.714	102.414
	87.918	96.083	96.187	89.251	82.472	78.425	70.123	86.839	90.668	92.462	74.64	89.041	86.458	94.71	91.731	91.093	96.461	82.71	74.848	94.028	93.272	91.213	81.376	85.568	90.011	83.294	65.182	94.79	94.221	72.794	61.435	92.698	87.52	93.319	67.122	92.199	87.46	91.649	76.857	95.721	91.433	87.258	83.312	89.258	88.717	91.42	79.773	89.714	102.414
	87.918	96.083	96.187	89.251	82.472	78.425	70.123	86.839	90.668	92.462	74.64	89.041	86.458	94.71	91.731	91.093	96.461	82.71	74.848	94.028	93.272	91.213	81.376	97.51	90.011	83.294	65.182	94.79	94.221	72.794	61.435	92.698	87.52	93.319	67.122	92.199	87.46	91.649	76.857	95.721	91.433	87.258	83.312	89.258	88.717	91.42	79.773	89.714	102.414
	87.918	96.083	96.187	89.251	86.446	78.425	70.123	86.839	90.668	92.462	74.64	89.041	86.458	94.71	91.731	91.093	96.461	82.71	74.848	94.028	93.272	91.213	81.376	97.51	90.011	83.294	65.182	89.318	88.188	72.794	61.435	92.698	87.52	93.319	67.122	92.199	87.46	91.649	76.857	95.721	91.433	87.258	83.312	89.258	88.717	91.42	79.773	89.714	102.414
	87.918	96.083	96.187	89.251	86.446	78.425	70.123	86.839	90.668	92.462	74.64	89.041	86.458	94.71	91.731	91.093	96.461	81.132	74.848	94.028	93.272	91.213	81.376	97.51	90.011	83.294	65.182	89.318	88.188	72.794	61.435	92.698	87.52	93.319	67.122	92.199	87.46	91.649	78.208	87.659	91.433	87.258	83.312	89.258	88.717	91.42	79.773	89.714	102.414
	87.918	96.083	96.187	89.251	86.446	78.425	74.229	86.839	90.668	92.462	74.64	89.041	86.458	94.71	91.731	91.093	96.461	81.132	74.848	94.028	93.272	91.213	81.376	97.51	90.011	83.294	65.182	89.318	98.684	72.794	55.122	92.698	87.52	93.319	67.122	92.199	87.46	91.649	78.208	87.659	91.433	87.258	83.312	89.258	88.717	91.42	79.773	89.714	102.414
	87.918	96.083	96.187	89.251	86.446	78.425	74.229	86.839	90.668	92.462	74.64	95.256	86.458	94.71	91.731	91.093	96.461	81.132	74.848	94.028	93.272	91.213	81.376	97.51	90.011	83.294	65.182	89.318	98.684	72.794	55.122	92.698	87.52	93.319	67.122	92.199	87.46	91.649	76.603	82.45	91.433	87.258	83.312	89.258	88.717	91.42	79.773	89.714	102.414
	87.918	96.083	96.187	89.251	83.788	78.425	74.229	86.839	90.668	92.462	72.631	95.256	86.458	94.71	91.731	91.093	96.461	81.132	74.848	94.028	93.272	91.213	81.376	91.338	90.011	87.593	65.182	89.318	82.958	72.794	55.122	92.698	87.52	92.815	67.122	92.199	87.46	91.649	76.603	82.45	91.433	87.258	83.312	89.258	88.717	91.42	79.773	89.714	102.414
	87.918	96.083	96.187	89.251	83.788	78.425	74.229	86.839	90.668	92.462	72.631	100.765	86.458	94.71	91.731	91.093	96.461	81.132	74.848	87.005	93.272	91.213	81.376	91.338	90.011	87.593	65.182	89.318	82.958	72.794	61.025	92.698	87.52	92.815	67.122	92.199	105.219	91.649	76.603	82.45	91.433	87.258	83.312	89.258	88.717	91.42	79.773	89.714	101.535
	87.918	96.083	96.187	89.251	83.788	78.425	61.747	86.839	90.668	92.462	72.631	100.765	86.458	94.71	91.731	91.093	96.461	81.132	74.848	87.005	93.272	91.213	81.376	91.338	90.011	87.593	65.182	89.318	82.958	72.794	61.025	92.698	87.52	92.815	62.035	92.199	105.219	91.649	73.299	82.45	91.433	75.397	83.312	89.258	88.717	91.42	79.773	89.714	101.535
	87.918	96.083	96.187	89.251	83.788	78.425	61.747	86.839	90.668	92.462	72.631	104.076	86.458	94.71	91.731	91.093	96.461	81.132	74.848	88.888	93.272	91.213	81.376	91.338	90.011	87.593	65.182	89.318	82.958	72.794	61.025	92.698	87.52	92.815	62.035	92.199	105.219	91.649	73.299	82.45	90	75.397	83.312	89.258	88.717	91.42	79.773	89.714	101.535
	87.918	96.083	96.187	89.251	83.788	78.425	61.747	86.839	90.668	92.462	72.631	104.076	86.458	94.71	91.731	91.093	88.684	81.132	74.848	88.888	93.272	91.213	81.376	91.338	90.011	87.593	65.182	89.318	82.958	72.794	61.025	92.698	87.52	92.815	62.035	92.199	105.219	91.649	73.299	82.45	90	75.397	83.312	89.258	88.717	91.42	79.773	89.714	101.535
	94.69	96.083	96.187	89.251	83.788	78.425	63.506	98.214	90.668	92.462	72.631	87.811	86.458	94.71	91.731	91.093	88.684	81.132	74.848	88.888	93.272	91.213	81.376	91.338	90.011	87.593	71.424	89.318	82.958	72.794	61.025	92.698	87.52	91.962	62.035	92.199	101.599	91.649	73.299	82.45	90	75.397	83.312	89.258	88.717	91.42	79.773	89.714	101.535
	94.69	96.083	96.187	89.251	83.788	78.425	63.506	98.214	90.668	92.462	72.631	87.811	86.458	94.71	91.731	91.093	88.684	81.132	74.848	88.888	93.272	91.213	81.376	91.338	90.011	87.593	71.424	89.318	96.365	72.794	61.025	92.698	87.52	91.962	62.035	92.199	101.599	91.649	65.795	82.45	90	75.397	83.312	89.258	94.083	91.42	79.773	89.714	101.535
	94.69	96.083	96.187	89.251	83.788	78.425	51.927	98.214	90.668	92.462	72.631	87.811	86.458	94.71	91.731	91.093	88.684	81.132	74.848	88.888	93.272	91.213	81.376	90.454	90.011	87.593	63.844	89.318	96.365	72.794	61.025	92.698	87.52	91.962	62.035	92.199	101.599	91.649	65.795	82.45	90	94.162	83.312	89.258	94.083	91.42	79.773	89.714	88.811
	94.69	96.083	96.187	75.854	83.788	78.425	51.927	98.214	90.668	92.462	72.631	87.811	90.388	94.71	91.731	91.093	88.684	81.132	74.848	88.888	93.272	91.213	81.376	90.454	90.011	87.593	63.844	89.318	96.365	71.766	61.025	92.698	87.52	91.962	62.035	89.54	92.543	91.649	65.795	82.45	90	94.162	83.312	89.258	94.083	91.42	77.285	89.714	88.811
	94.69	96.083	83.31	75.854	83.788	78.425	68.932	98.214	90.668	92.462	72.631	87.811	90.388	94.71	91.731	91.093	87.35	81.132	74.848	88.888	93.272	91.213	81.376	90.454	90.011	87.593	63.844	89.318	96.365	71.766	61.025	92.698	91.286	91.962	62.035	89.54	92.543	91.649	65.795	84.674	90	94.162	83.312	89.258	94.083	91.42	77.285	89.714	88.811
	94.69	96.083	83.31	97.881	83.788	78.425	68.932	98.214	90.668	92.462	72.631	87.811	90.388	92.588	91.731	91.093	87.35	81.132	74.848	88.888	93.272	91.213	81.376	90.454	90.011	87.593	63.844	89.318	96.365	71.766	61.025	90.236	91.286	91.962	62.035	84.761	92.543	91.649	68.652	84.674	90	94.162	83.312	89.258	94.083	91.42	77.285	89.714	88.811
	94.69	96.083	83.31	97.881	83.788	78.425	68.932	98.214	90.668	92.462	72.631	87.811	90.816	92.588	91.731	91.093	87.35	81.132	74.848	88.888	93.272	91.213	81.376	90.454	90.011	87.593	63.844	89.318	96.365	71.766	62.929	90.236	91.286	91.962	62.035	84.761	92.543	91.649	68.652	84.674	87.725	94.162	83.312	89.258	94.083	91.42	77.285	89.714	88.811
	94.69	96.083	83.31	97.881	83.788	78.425	73.432	98.214	90.668	92.462	72.631	87.811	90.816	92.588	91.731	91.093	87.35	81.132	75.252	88.888	93.272	91.213	81.376	90.454	90.011	87.593	63.844	89.318	96.365	71.766	62.929	90.236	91.286	91.962	59.216	84.761	89.271	91.649	68.652	84.674	87.725	94.162	83.312	89.258	94.083	91.42	77.285	89.714	88.811
	94.69	96.083	83.31	92.219	87.899	78.425	73.432	98.214	90.668	92.462	72.631	87.811	90.816	92.588	91.731	91.093	87.35	81.132	75.252	88.888	93.272	91.213	81.376	90.454	90.011	87.593	63.844	89.318	90.182	71.766	62.929	90.236	91.286	91.962	59.216	94.571	89.271	91.649	68.652	84.674	90.455	94.162	83.312	89.258	94.083	91.42	66.243	89.714	88.811
	94.69	96.083	83.31	92.219	87.899	78.425	73.432	98.214	90.668	92.462	72.631	87.811	90.816	92.588	91.731	91.093	87.35	81.132	75.252	88.888	93.272	91.213	81.376	90.454	90.011	87.593	63.844	89.318	90.182	71.766	66.514	90.236	91.286	91.962	59.216	94.571	89.271	91.649	68.652	84.674	90.455	94.162	83.312	89.258	94.083	91.42	66.243	89.714	96.661
	94.69	96.083	83.31	86.933	87.899	78.425	73.432	98.214	90.668	92.462	72.631	87.811	90.816	92.588	91.731	91.093	87.35	81.132	75.252	88.888	93.272	91.213	81.376	90.454	90.011	87.593	63.844	89.318	83.323	75.994	66.514	90.236	91.286	91.962	59.216	94.571	89.271	91.649	68.652	92.957	90.455	94.162	83.312	89.258	94.083	91.42	71.989	89.714	96.661
	94.69	96.083	83.31	86.933	87.899	83.134	73.432	98.214	90.668	92.462	72.631	87.811	90.816	92.588	91.731	91.093	87.35	81.132	75.252	88.888	93.272	91.213	81.376	90.454	90.011	87.593	63.844	89.318	83.323	75.994	66.514	90.236	91.286	91.962	59.216	94.571	89.271	91.649	68.652	92.957	90.455	94.162	83.312	89.258	94.083	91.42	71.989	89.714	96.661
	94.69	96.083	83.31	86.933	87.899	83.134	73.432	98.214	90.668	92.462	72.631	87.811	90.816	92.588	91.731	91.093	87.35	81.132	75.252	88.888	93.272	91.213	81.376	90.454	90.011	87.593	63.844	89.318	83.323	75.994	66.514	90.236	91.286	91.962	59.216	94.571	89.271	91.649	68.652	92.957	90.455	94.162	83.312	89.258	94.083	91.42	71.989	89.714	96.661
	94.69	96.083	83.31	86.933	87.899	83.134	73.432	98.214	90.668	92.462	72.631	87.811	90.816	91.747	91.731	91.093	87.35	81.132	75.252	80.238	93.272	91.213	81.376	90.454	90.011	87.593	63.844	89.318	76.459	75.994	66.514	90.236	91.286	91.962	59.216	94.571	89.271	91.649	68.652	92.957	90.455	94.162	83.312	89.258	94.083	91.42	75.933	89.714	96.661
	94.69	96.083	83.31	85.388	79.448	83.134	73.432	98.214	90.668	92.462	72.631	87.811	90.816	91.747	91.731	91.093	87.35	81.132	81.254	80.238	93.272	91.213	81.376	90.454	90.011	87.593	63.844	89.318	85.721	75.994	66.514	90.236	79.716	91.962	59.216	94.571	89.271	91.649	68.652	92.957	90.455	94.162	83.312	99.306	94.083	91.42	75.933	89.714	96.661
	94.69	96.083	83.31	85.388	79.448	83.134	60.755	98.214	90.668	92.462	78.609	87.811	90.816	91.747	91.731	91.093	87.35	81.132	81.254	80.238	93.272	91.213	81.376	90.454	90.011	87.593	63.844	89.318	85.721	83.517	66.514	90.236	79.716	91.962	59.216	94.571	89.271	91.649	68.652	92.957	90.455	94.162	83.312	99.306	94.083	91.42	75.933	89.714	96.661
	94.69	96.083	83.31	85.388	79.448	83.134	60.755	98.214	90.668	92.462	78.609	87.811	90.816	94.921	91.731	91.093	87.35	81.132	81.254	80.238	93.272	91.213	81.376	90.454	90.011	87.593	72.038	89.318	85.721	83.517	66.514	90.236	79.716	91.962	59.216	94.571	89.271	91.649	68.652	92.957	90.455	94.162	83.312	99.306	94.083	91.42	75.933	89.714	96.661
	94.69	96.083	83.31	85.388	79.448	83.134	60.755	98.214	90.668	92.462	78.609	87.811	90.816	94.921	91.731	91.093	87.35	81.132	81.254	94.611	93.272	91.213	81.376	90.454	90.011	87.593	72.038	89.318	85.721	83.517	66.514	90.236	79.716	91.962	59.216	94.571	89.271	91.649	68.652	94.01	90.455	89.612	83.312	99.306	94.083	91.42	65.051	89.714	96.661
	94.69	96.083	83.31	85.388	88.144	83.134	60.755	98.214	90.668	92.462	78.609	87.811	90.816	94.921	91.731	91.093	87.35	81.132	81.254	94.611	93.272	91.213	81.376	90.454	90.011	87.593	72.038	89.318	85.721	83.517	66.514	90.236	79.716	91.962	59.216	94.571	89.271	91.649	68.652	94.01	91.593	89.612	83.312	99.306	94.083	91.42	65.051	89.714	86.363
	94.69	96.083	83.31	85.388	88.144	83.134	60.755	98.214	90.668	92.462	78.609	87.811	90.816	108.119	91.731	91.093	85.265	81.132	81.254	90.337	93.272	91.213	81.376	90.454	90.011	87.593	72.038	89.318	75.083	83.517	66.815	90.236	90.653	91.962	59.216	94.571	89.271	91.649	68.652	90.803	91.593	85.44	83.312	99.306	94.083	91.42	65.051	89.714	86.363
	94.69	96.083	64.785	85.388	88.316	83.134	57.047	98.214	90.668	92.462	78.609	87.811	90.816	108.119	91.731	91.093	85.265	81.132	81.254	90.337	93.272	91.213	81.376	90.454	90.011	87.593	72.038	89.318	75.083	83.517	66.815	90.866	90.653	91.962	59.216	94.571	89.271	91.649	68.652	90.803	91.593	85.44	83.312	99.306	94.083	91.42	65.051	89.714	86.363
	94.69	96.083	64.785	85.388	88.316	83.134	57.047	98.214	90.668	92.462	78.609	87.811	90.816	106.825	91.731	91.093	85.265	81.132	81.254	90.337	93.272	91.213	81.376	90.454	90.011	87.593	72.038	89.318	75.083	70.859	72.051	90.866	90.653	91.962	59.216	70.067	89.271	91.649	86.416	90.803	91.593	85.44	83.312	99.306	94.083	91.42	65.051	89.714	86.363
	94.69	96.083	64.785	85.388	88.316	83.134	57.047	84.067	90.668	92.462	78.609	87.811	90.816	106.825	91.731	91.093	85.265	81.132	81.254	90.337	93.272	91.213	81.376	90.454	90.011	87.593	72.038	89.318	75.083	70.859	72.051	90.866	91.604	91.962	59.216	70.067	89.271	91.649	86.416	90.803	91.593	85.44	83.312	99.306	94.083	91.42	65.051	89.714	86.363
	94.69	96.083	64.785	85.388	98.677	83.134	57.047	84.067	90.668	92.462	78.609	87.811	90.816	109.973	91.731	91.093	85.265	81.132	81.254	90.337	93.272	91.213	81.376	90.454	90.011	87.593	72.038	89.318	75.083	70.859	72.051	90.866	91.604	91.962	59.216	70.067	89.271	91.649	86.416	91.223	91.593	85.44	83.312	99.306	94.083	91.42	71.757	89.714	86.363
	94.69	96.083	64.785	85.388	98.677	83.134	56.058	93.952	90.668	92.462	78.609	87.811	90.816	109.973	91.731	91.093	85.265	81.132	81.254	90.337	93.272	91.213	81.376	90.454	90.011	87.593	72.038	89.318	93.027	70.859	67.649	90.866	91.604	91.962	59.216	70.067	89.271	91.649	86.416	91.223	91.593	85.44	83.312	99.306	94.083	90.899	71.757	89.714	86.363
	94.69	96.083	64.785	85.388	98.677	91.91	56.058	93.952	90.668	92.462	78.609	87.811	90.816	109.973	91.731	91.093	85.265	81.132	81.254	90.337	93.272	91.213	81.376	90.454	90.011	87.593	73.389	89.318	93.027	70.859	67.649	90.866	91.604	91.962	59.216	70.067	89.271	91.649	86.416	91.223	91.593	85.44	83.312	99.306	94.083	90.899	71.757	89.714	86.363
	94.69	96.083	64.785	85.388	98.677	91.91	56.058	93.952	90.668	92.462	78.609	87.811	90.816	109.973	91.731	91.093	85.265	81.132	81.254	90.337	93.272	91.213	81.376	90.454	90.011	87.593	73.389	89.318	93.027	70.859	67.649	90.866	91.604	91.962	59.216	95.099	89.271	91.649	86.416	91.223	91.593	85.44	83.312	80.628	94.083	90.899	71.757	89.714	86.363
	94.69	96.083	64.785	85.388	98.677	91.91	56.058	92.75	90.668	92.462	78.609	87.811	90.816	109.973	91.731	91.093	85.265	81.132	81.254	90.337	93.272	91.213	81.376	90.454	90.011	87.593	75.538	86.331	93.027	70.859	67.649	90.866	91.604	91.962	59.216	95.099	89.271	91.649	86.416	91.223	91.593	85.44	83.312	80.628	94.083	91.808	71.757	89.714	86.363
	95.41	96.083	64.785	85.388	98.677	91.91	56.058	92.75	90.668	92.462	78.609	87.811	90.816	109.973	91.731	91.093	85.265	81.132	81.254	90.337	93.272	91.213	46.297	90.454	90.011	87.593	75.538	86.331	93.027	70.859	67.649	90.866	91.604	91.962	49.998	95.099	89.271	91.649	86.416	91.223	91.593	85.44	83.312	80.628	94.083	91.808	71.757	89.714	86.363
	95.41	97.815	82.868	89.39	98.677	91.91	56.058	83.277	90.668	92.462	78.609	87.811	90.816	109.973	91.731	91.093	85.265	81.132	81.254	90.337	93.272	91.213	46.297	90.454	90.011	87.593	75.538	86.331	93.027	70.859	68.635	90.866	91.604	91.962	49.998	95.099	89.271	91.649	86.416	91.223	91.593	85.44	83.312	80.628	94.083	91.808	75.842	89.714	86.363
	95.41	97.815	84.903	89.39	98.677	91.91	56.058	83.277	90.668	92.462	78.609	87.811	90.816	98.462	91.731	91.093	85.265	81.132	81.254	90.337	93.272	91.213	46.297	90.454	90.011	87.593	75.538	86.331	93.027	70.859	68.635	90.866	91.604	91.962	83.936	88.06	82.475	91.649	86.416	91.223	91.593	85.44	83.312	80.628	94.083	91.808	75.842	89.714	86.363
	95.41	97.815	84.903	89.39	98.677	91.91	56.058	88.274	90.668	92.462	78.609	87.811	90.816	98.462	91.731	91.093	85.265	81.132	81.254	88.124	93.272	91.213	74.394	93.576	90.011	87.593	75.538	90.425	93.027	70.859	68.635	90.866	91.604	91.962	83.936	88.06	82.475	91.649	79.537	91.223	91.593	85.44	83.312	96.226	94.083	91.808	75.842	89.714	86.363
	95.41	97.815	73.77	89.39	121.848	91.91	56.058	88.274	90.668	92.462	78.609	101.438	90.816	98.462	91.731	91.093	85.265	81.132	81.254	88.124	93.272	91.213	74.394	93.576	90.011	87.593	75.538	90.425	93.027	70.859	68.635	90.866	91.604	91.962	83.936	88.06	82.475	91.649	79.537	91.223	91.593	85.44	83.312	96.226	94.083	91.808	47.613	89.714	86.363
	95.41	91.224	73.77	87.369	121.848	77.29	56.058	88.274	90.668	92.462	78.609	101.438	90.816	98.462	91.731	91.093	85.265	81.132	81.254	88.124	93.272	91.213	74.394	93.576	89.951	87.593	75.538	90.425	93.027	70.859	68.635	90.866	91.604	91.962	83.936	88.06	88.638	91.649	79.537	91.223	91.593	85.44	83.312	96.226	94.083	91.808	47.613	89.714	86.363
	95.41	91.224	73.77	87.369	121.848	77.29	56.058	98.334	90.668	92.462	78.609	101.438	90.816	98.462	91.731	91.093	85.265	81.132	81.254	88.124	93.272	91.213	74.394	93.576	89.951	87.593	75.538	90.425	93.027	70.859	68.635	90.866	91.604	91.962	83.936	88.06	88.638	91.649	79.537	91.223	91.593	85.44	83.312	96.226	90.485	91.808	47.613	89.714	86.363
	95.41	91.224	65.14	87.369	121.848	77.29	56.058	98.334	90.668	92.462	64.374	80.811	90.816	98.462	76.722	91.093	85.265	81.132	81.254	88.124	93.272	91.213	74.394	93.576	89.951	87.593	76.611	90.425	93.027	70.859	75.965	90.866	91.604	91.962	83.936	88.06	88.638	91.649	79.537	91.223	91.593	85.44	83.312	96.226	90.485	91.808	82.712	89.714	86.363
	95.41	91.224	65.14	87.369	76.529	77.29	56.058	98.334	90.668	92.462	64.374	80.811	90.816	102.036	76.722	91.093	85.265	81.132	81.254	88.124	93.272	91.213	75.115	93.576	89.951	87.593	76.611	90.425	93.027	70.859	75.965	90.866	91.604	91.962	83.936	88.06	88.638	91.649	79.537	91.223	91.593	85.44	83.312	96.226	90.485	91.808	82.712	89.714	86.363
	95.41	91.224	65.14	87.369	76.529	77.29	56.058	90.385	90.668	92.462	64.374	80.811	90.816	102.036	76.722	91.093	85.265	81.132	81.254	88.124	93.272	91.213	75.115	93.576	89.951	87.593	76.611	90.425	93.027	70.859	75.965	90.866	91.604	91.962	83.936	92.909	78.258	91.649	79.537	91.223	91.593	85.44	83.312	96.226	90.485	91.808	82.712	89.714	86.363
	68.825	91.224	65.14	87.369	84.021	77.29	56.058	90.385	90.668	92.462	64.374	80.811	90.816	102.036	76.722	91.093	85.265	81.132	81.254	88.124	93.272	91.213	75.115	93.576	89.951	87.593	76.611	90.425	117.945	70.859	75.965	90.866	91.604	91.962	66.673	92.909	78.258	94.954	79.537	91.223	91.593	76.166	83.312	96.226	90.485	91.808	82.712	89.714	86.363
	68.825	91.224	65.14	87.369	84.021	77.29	56.058	90.385	90.668	92.462	64.374	80.811	90.816	95.623	76.722	91.093	85.265	81.132	81.254	89.087	93.272	91.213	75.115	82.593	89.951	87.593	76.611	90.425	117.945	70.859	75.965	90.866	91.604	82.653	66.673	92.909	78.258	94.954	79.537	91.223	91.593	76.166	83.312	96.226	90.485	91.808	82.712	89.714	86.363
	80.925	92.173	65.14	87.369	84.021	77.29	56.058	90.252	90.668	92.462	64.374	80.811	90.816	95.623	76.722	91.093	101.917	81.132	81.254	89.087	93.272	91.213	75.115	82.593	89.951	87.593	72.725	90.425	117.945	70.859	75.965	90.866	91.604	82.653	66.673	92.909	94.735	94.954	79.537	91.223	91.593	76.166	83.312	98.869	90.485	91.808	82.712	89.714	86.363
	80.925	92.173	65.14	87.369	108.177	77.29	56.058	90.252	90.668	92.462	64.374	96.955	90.816	95.623	80.554	91.093	101.917	81.132	81.254	89.087	93.272	91.213	75.115	82.593	89.951	87.593	72.725	90.425	82.797	70.859	75.965	90.866	91.604	82.653	66.673	92.909	94.735	94.954	79.537	91.223	91.593	76.166	83.312	98.869	90.485	91.808	82.712	89.714	86.363
	80.925	92.173	65.14	87.369	108.177	77.29	52.664	90.252	90.668	99.761	64.374	96.955	90.816	95.623	80.554	91.093	101.917	81.132	81.254	93.506	93.272	91.213	75.115	87.69	89.951	87.593	72.725	90.425	82.797	70.859	75.965	90.866	91.604	82.653	66.673	92.909	94.735	94.954	79.537	91.223	91.593	76.166	83.312	98.869	90.485	91.808	82.712	89.714	86.363
	80.925	92.173	67.042	87.369	108.177	77.29	52.664	90.252	90.668	99.761	64.374	96.955	90.816	95.623	80.554	91.093	101.917	81.132	81.254	93.506	93.272	91.213	75.115	87.69	89.951	87.593	57.359	90.425	81.952	70.859	66.812	90.866	91.604	82.474	80.309	92.909	94.735	94.954	79.537	91.49	91.593	90.364	83.312	89.249	93.238	91.808	82.712	89.714	86.363
	80.925	92.173	67.042	87.369	108.177	77.29	52.664	92.662	90.668	83.534	64.374	87.492	90.816	95.623	80.554	91.093	101.917	81.132	81.254	93.506	93.272	91.213	75.115	87.69	89.951	87.593	57.359	90.425	81.952	73.736	66.812	90.866	91.604	82.474	85.507	92.909	94.735	94.954	79.537	91.49	91.593	90.364	83.312	89.249	93.238	91.808	82.712	89.714	86.363
	80.925	92.173	67.042	87.369	86.53	77.29	52.664	92.662	90.668	83.534	31.95	87.492	90.816	95.623	80.554	91.093	101.917	81.132	81.254	93.506	93.272	91.213	75.115	87.69	89.951	87.593	57.359	90.425	81.952	73.736	66.812	90.866	91.604	82.474	85.507	92.671	94.735	94.954	79.537	91.49	91.593	90.364	86.333	89.249	93.238	84.923	82.712	89.714	86.363
	80.925	92.173	67.042	87.369	86.53	77.29	52.664	85.167	90.668	83.534	31.95	87.492	90.816	95.623	80.554	91.093	89.641	81.132	81.254	89.402	93.272	91.213	75.115	87.69	89.951	87.593	57.359	90.425	81.952	73.736	66.812	83.606	91.604	82.474	85.507	92.671	91.758	94.954	79.537	91.49	91.593	90.364	86.333	89.249	93.238	84.923	82.712	89.714	86.363
	80.925	92.173	67.042	87.369	86.53	77.29	52.664	85.167	90.668	83.534	31.95	87.492	90.816	95.623	80.554	91.093	89.641	81.132	81.254	89.402	93.272	91.213	75.115	87.69	89.951	87.593	57.359	91.965	81.952	73.736	64.241	83.606	91.604	82.474	85.507	92.671	91.758	94.954	79.537	91.49	91.593	90.364	86.333	89.249	93.238	84.923	82.712	89.714	86.363
	80.925	92.173	67.042	87.369	86.53	77.29	52.664	85.167	90.668	83.534	31.95	87.492	90.816	95.623	80.554	91.093	89.641	81.132	81.254	89.402	93.272	91.213	75.115	87.69	89.951	87.593	57.359	91.965	85.927	67.57	64.241	83.606	91.604	87.341	85.507	92.671	91.758	94.954	71.898	91.49	91.593	93.199	86.333	89.249	93.238	84.923	82.712	89.714	86.363
	80.925	114.495	67.042	87.369	86.53	77.29	44.235	85.167	90.668	83.534	72.43	87.492	90.816	95.623	86.837	91.093	101.102	81.132	81.254	89.402	93.272	91.213	75.115	87.69	89.951	87.593	55.156	91.965	85.927	67.57	64.241	83.606	91.604	87.341	85.507	92.671	91.758	94.954	71.898	91.49	85.119	93.199	86.333	89.249	93.238	84.923	82.712	89.714	86.363
	80.925	114.495	67.042	91.86	86.53	77.29	44.235	90	90.668	83.534	72.43	87.492	90.816	95.623	86.837	91.093	101.102	81.132	81.254	90.258	93.272	91.213	75.115	87.69	89.951	103.524	55.156	91.965	95.894	91.776	64.241	83.606	91.604	87.341	85.507	92.671	91.758	94.954	71.898	88.012	85.119	93.199	86.333	89.249	93.238	84.923	82.712	89.714	86.363
	80.925	114.495	67.042	91.86	86.53	77.29	44.235	90	90.668	83.534	72.43	87.492	90.816	95.623	86.837	91.093	99.458	81.132	81.254	90.258	93.272	91.213	75.115	87.69	89.951	103.524	55.156	93.965	95.894	91.776	64.241	83.606	91.604	87.341	85.507	92.671	91.758	94.954	71.898	88.012	85.119	93.199	86.333	89.249	93.238	84.923	82.712	89.714	86.363
	80.925	95.258	57.314	91.86	86.53	77.29	45.488	90	90.668	83.534	72.43	99.086	90.816	95.623	86.837	91.093	99.458	81.132	81.254	90.258	84.63	91.213	75.585	87.69	92.329	103.524	55.156	93.965	95.894	91.776	64.241	96.125	91.604	87.341	85.507	92.671	91.758	94.954	76.611	88.012	85.119	93.199	86.333	89.249	93.238	84.923	82.712	89.714	86.363
	80.925	95.258	57.314	91.86	86.53	77.29	45.488	90	90.668	83.534	72.43	99.086	90.816	95.623	84.064	91.093	99.458	81.132	81.254	90.258	84.63	91.213	75.585	87.69	92.329	103.524	55.156	93.965	95.894	91.776	64.241	96.125	91.604	87.341	85.507	92.671	91.758	94.954	76.611	88.012	85.119	93.199	86.333	89.249	93.238	84.923	82.712	89.714	86.363
	80.925	95.258	57.314	91.86	86.53	77.29	45.488	90	90.668	83.534	72.43	99.086	90.816	95.623	84.064	91.093	99.458	81.132	81.254	90.258	84.63	91.213	75.585	87.69	92.329	103.524	54.562	93.965	95.894	91.776	64.241	93.085	91.604	87.341	85.507	92.671	91.758	94.954	76.611	88.012	85.119	93.199	86.333	89.249	93.238	73.802	82.712	89.714	86.363
	80.925	103.089	57.314	91.86	86.53	77.29	90.644	90	90.668	89.261	72.43	80.184	90.816	95.623	90.563	91.093	99.458	81.132	81.254	90.258	84.63	91.213	75.585	87.69	92.329	93.021	54.562	93.965	95.894	91.776	64.241	93.085	91.604	87.341	85.507	92.671	91.758	94.954	76.611	88.012	85.119	93.199	86.333	89.249	93.238	73.802	82.712	89.714	86.363
	80.925	103.089	76.029	91.86	86.53	77.29	90.644	90	90.668	89.261	72.43	80.184	90.816	95.623	90.563	91.093	90.824	81.132	81.254	90.258	84.63	91.213	79.767	87.69	92.329	93.021	54.562	93.965	95.894	91.776	64.241	93.085	91.604	87.341	85.507	92.671	91.758	94.954	82.584	88.012	85.119	93.199	86.333	89.249	93.238	73.802	82.712	89.714	86.363
	80.925	95.566	76.029	91.86	86.53	77.29	90.644	87.745	90.668	89.261	72.43	92.787	90.816	95.623	90.563	91.093	90.824	81.132	81.254	90.258	84.63	91.213	79.767	87.69	92.005	93.021	54.562	93.965	95.894	106.03	64.241	93.085	91.604	87.341	85.507	92.671	91.758	94.954	82.584	84.411	85.119	93.199	86.333	89.249	93.238	73.802	82.712	89.714	86.363
	80.925	95.566	76.029	91.86	86.53	77.29	90.644	87.745	90.668	89.261	77.517	92.787	90.816	95.623	90.563	91.093	90.824	81.132	81.254	88.925	84.63	91.213	79.767	87.69	92.005	93.021	54.562	93.965	95.894	106.03	72.235	93.085	91.604	87.341	85.507	92.671	91.758	94.954	82.584	84.411	85.119	93.199	86.333	89.249	93.238	73.802	82.712	89.714	86.363
	80.925	95.566	76.029	91.86	86.53	77.29	90.644	87.745	90.668	89.261	77.517	92.787	90.816	95.623	90.563	91.093	90.824	81.132	81.254	88.925	84.63	91.213	79.767	87.69	92.005	93.021	54.562	93.965	95.894	106.03	72.235	93.085	91.604	87.341	85.507	92.671	87.672	94.954	82.584	84.411	85.119	93.199	86.333	89.249	93.238	93.168	82.712	89.714	86.363
	80.925	95.566	76.029	91.86	86.53	77.29	90.644	87.745	90.668	89.261	77.517	92.787	90.816	95.623	76.89	91.093	90.824	81.132	81.254	88.925	90	91.213	79.767	87.69	92.005	105.66	54.562	93.965	95.894	106.03	67.148	93.085	91.604	87.341	85.507	92.671	87.672	94.954	82.584	91.859	85.119	93.199	86.333	89.249	93.238	93.168	82.712	89.714	86.363
	80.925	95.566	76.029	91.86	99.322	77.29	90.971	87.745	90.668	89.261	77.517	92.787	90.816	95.623	76.89	91.093	90.824	77.331	81.254	97.009	90	91.213	79.767	87.69	92.005	105.66	54.562	87.751	95.894	106.03	67.148	93.085	91.604	93.947	85.507	92.671	87.672	94.954	82.584	91.859	85.119	88.35	86.333	89.249	89.006	93.168	82.712	89.714	86.363
	80.925	95.566	76.029	91.86	99.322	77.29	90.971	87.745	90.668	89.261	77.517	92.787	90.816	95.623	76.89	91.093	90.824	77.331	81.254	97.009	101.437	91.213	79.767	87.69	92.005	105.66	54.562	87.751	95.894	106.03	67.148	93.085	91.604	93.947	85.507	92.671	87.672	94.954	82.584	88.736	85.119	88.35	86.333	89.249	89.006	93.168	82.712	89.714	86.363
	80.925	95.566	76.029	91.86	99.322	77.29	90.971	87.745	90.668	89.261	77.517	103.432	90.816	95.623	76.89	91.093	90.824	93.243	81.254	95.702	101.437	91.213	79.767	87.69	92.005	99.516	76.911	87.751	95.894	106.03	67.148	93.085	91.604	93.947	85.507	83.253	87.672	94.954	83.82	88.736	85.119	89.104	86.333	89.249	89.006	93.168	82.712	89.714	86.363
	80.925	95.566	76.029	91.86	87.224	77.29	90.971	87.745	90.668	89.261	77.517	103.432	90.816	95.623	76.89	91.093	91.234	93.243	81.254	95.702	101.437	91.213	79.767	87.69	88.13	99.516	76.911	87.751	95.894	106.03	67.148	93.085	91.604	93.947	85.507	83.253	87.672	94.954	83.82	88.736	85.119	89.104	86.333	89.249	89.006	93.168	82.712	89.714	86.363
	80.925	95.566	76.029	91.86	87.224	77.29	90.971	87.745	90.668	89.261	77.517	88.545	92.318	95.623	76.89	91.093	91.234	93.243	81.254	95.702	101.437	91.213	76.888	87.69	88.13	99.516	65.993	84.867	95.894	106.03	67.957	93.085	91.604	93.947	85.507	94.13	87.672	94.954	83.82	88.736	85.119	89.104	86.333	89.249	89.006	93.168	82.712	89.714	86.363
	80.925	95.566	76.029	91.86	87.224	77.29	90.971	87.745	89.749	89.261	77.517	88.545	92.318	95.623	76.89	91.093	91.234	93.243	81.254	95.702	101.437	91.213	76.888	87.69	88.13	99.516	65.993	84.867	95.894	78.58	67.957	100.067	91.604	93.947	85.507	94.13	87.672	94.954	83.82	79.584	85.119	89.104	86.333	89.249	90.248	93.168	82.712	89.714	86.363
	80.925	95.566	83.67	91.86	87.224	77.29	90.971	87.745	89.749	89.261	77.517	88.545	92.318	95.623	82.653	91.093	91.234	93.243	81.254	90.244	101.437	91.213	76.888	87.69	88.13	99.516	65.993	84.867	95.894	78.58	67.957	100.067	91.604	93.947	85.507	94.13	87.672	94.954	83.82	79.584	85.119	89.104	86.333	89.249	90.248	93.168	82.712	89.714	86.363
	80.925	95.566	83.67	91.86	87.224	77.29	90.971	87.745	89.749	89.261	77.517	85.89	98.477	95.623	82.653	91.093	91.234	93.243	81.254	90.244	84.042	91.213	76.888	87.69	88.13	99.516	65.993	84.867	95.894	78.58	67.957	100.067	91.604	93.947	85.507	94.13	87.672	94.954	83.82	79.584	85.119	89.104	86.333	89.249	90.248	93.168	82.712	89.714	86.363
	80.925	95.566	71.285	91.86	87.224	77.29	90.971	87.745	89.749	89.261	77.517	85.89	98.477	95.623	82.653	91.093	91.234	93.243	81.254	90.244	84.042	91.213	76.888	87.69	88.13	99.516	65.993	84.867	95.894	79.251	45.496	100.067	91.604	93.947	85.507	94.13	91.758	94.954	83.82	79.584	85.119	89.104	86.333	89.249	90.248	93.168	82.712	89.714	86.363
	80.925	95.566	71.285	97.896	87.224	77.29	90.971	87.745	89.749	89.261	77.517	86.947	98.477	95.623	82.653	91.093	91.234	98.405	81.254	97.994	86.476	91.213	76.888	87.69	88.13	96.198	65.993	84.867	95.894	79.251	45.496	100.067	91.604	93.947	85.507	94.13	91.758	94.954	83.82	91.835	85.119	89.104	86.333	89.249	90.248	93.168	82.712	89.714	86.363
	80.925	95.566	71.285	97.896	87.224	77.29	90.971	91.682	89.749	89.261	77.517	86.947	98.477	95.623	82.653	91.093	91.234	98.405	81.254	97.994	86.476	91.213	76.888	87.69	88.13	96.198	65.993	84.867	95.894	79.251	45.496	100.067	91.604	93.947	85.507	94.13	91.758	94.954	83.82	91.835	85.119	89.104	86.333	89.249	90.248	93.168	82.712	89.714	86.363
	80.925	95.566	77.256	89.866	87.224	77.29	90.971	91.682	89.749	89.261	77.517	86.947	98.477	95.623	82.653	91.093	91.234	98.405	81.254	97.994	86.476	91.213	76.888	87.69	88.13	96.198	65.993	84.867	95.894	79.251	45.496	100.067	91.604	93.947	85.507	94.13	91.758	94.954	83.82	91.835	85.119	89.104	86.333	89.249	90.248	93.168	82.712	89.714	86.363
	80.925	95.566	77.256	89.866	87.224	77.29	90.971	91.682	89.749	89.261	67.167	86.947	98.477	95.623	82.653	91.093	91.234	98.405	81.254	97.994	86.476	91.213	76.888	87.69	88.13	96.198	70.519	84.867	95.894	79.251	45.496	100.067	99.701	93.947	85.507	94.861	82.296	94.954	83.82	91.835	85.119	89.104	86.333	89.249	90.248	93.168	82.712	89.714	86.363
	82.69	95.566	77.256	95.294	87.224	77.29	90.971	91.682	89.749	91.301	67.167	86.947	98.477	95.623	82.653	91.093	91.234	98.405	81.254	97.994	86.476	91.213	77.438	87.69	88.13	96.198	70.519	84.867	95.894	79.251	59.024	100.067	99.701	93.947	85.507	94.861	82.296	94.954	83.82	91.835	85.119	89.104	86.333	89.249	90.248	93.168	82.712	89.714	86.363
	82.69	95.566	77.256	95.294	87.224	77.29	90.971	90.588	89.749	91.301	67.167	86.947	98.477	95.623	82.653	91.093	91.234	81.097	81.254	97.994	86.476	91.213	77.438	87.69	88.13	96.198	70.519	84.867	95.894	79.251	59.024	100.067	99.701	93.947	85.507	94.861	82.296	94.954	81.461	91.835	85.119	89.104	86.333	89.249	90.248	93.168	82.712	89.714	86.363
	82.69	95.566	77.256	95.294	87.224	77.29	82.416	90.588	89.749	91.301	67.167	84.824	98.477	95.623	82.653	91.093	91.234	81.097	81.254	97.994	86.476	91.213	77.438	87.69	88.13	96.198	70.519	84.867	95.894	79.251	59.024	100.067	93.724	93.947	85.507	94.861	82.296	94.954	81.461	91.835	85.119	89.104	86.333	89.249	90.248	93.168	82.712	89.714	86.363
	82.69	95.566	77.256	95.294	87.224	77.29	82.416	90.588	89.749	91.301	78.13	84.824	98.477	95.623	82.653	91.093	91.234	81.097	81.254	97.994	86.476	91.213	77.438	87.69	88.13	96.198	70.519	84.867	95.894	79.251	59.024	100.067	93.724	93.947	85.507	80.941	93.62	94.954	81.461	91.835	85.119	89.104	86.333	89.249	90.248	93.168	82.712	89.714	86.363
	82.69	95.566	84.06	95.294	87.224	90.88	90.075	90.588	89.749	91.301	78.13	84.824	98.477	95.623	82.653	91.093	91.234	81.097	81.254	97.994	86.476	91.213	77.438	87.69	88.13	96.198	70.519	84.867	95.894	79.251	59.024	76.114	93.724	93.947	85.507	86.531	93.62	94.954	81.461	91.835	85.119	89.104	86.333	89.249	90.248	93.168	82.712	89.714	86.363
	82.69	95.566	84.06	95.294	87.224	90.88	90.075	90.588	89.749	91.301	78.13	84.824	98.477	95.623	82.653	91.093	91.234	81.097	81.254	87.848	100.044	91.213	77.438	87.69	88.13	96.198	70.519	84.867	95.894	79.251	59.024	86.237	93.724	93.947	85.507	86.531	93.62	94.954	81.461	91.835	85.119	89.104	86.333	89.249	90.248	93.168	82.712	89.714	86.363
	82.69	95.566	84.06	95.294	87.224	90.88	90.075	90.588	89.749	91.301	78.13	84.824	98.477	95.623	82.288	91.093	91.234	90.654	81.254	87.848	100.044	91.213	77.438	87.69	88.13	96.198	51.026	84.867	95.894	79.251	59.024	86.237	93.724	93.947	82.983	86.531	93.62	94.954	81.461	91.835	85.119	89.104	86.333	89.249	90.248	93.168	82.712	89.714	86.363
	82.69	95.566	84.06	95.294	87.224	90.88	90.075	90.244	91.879	91.301	78.13	101.276	98.477	95.623	82.288	91.093	91.234	90.654	81.254	87.848	85.998	91.213	77.438	87.69	88.13	96.198	51.026	84.867	95.894	79.251	59.024	86.237	93.724	93.947	82.983	87.365	98.154	94.954	81.461	91.835	85.119	89.104	86.333	89.249	90.248	93.168	82.712	89.714	86.363
	82.69	95.566	84.06	95.294	87.224	90.88	90.075	90.244	91.879	91.301	78.13	101.276	98.477	95.623	82.288	91.093	91.234	90.654	81.254	87.848	85.998	91.213	77.438	87.69	88.13	96.198	56.305	84.867	95.894	79.251	59.024	77.253	93.724	93.947	82.983	87.365	98.154	94.954	81.461	91.835	85.119	89.104	86.333	89.249	90.248	93.168	82.712	89.714	86.363
	82.69	95.566	84.06	95.294	88.938	90.88	90.075	90.244	93.532	91.301	78.13	101.276	91.102	95.623	80.463	91.093	91.234	90.654	81.254	85.939	85.998	91.213	77.438	87.69	88.13	96.198	56.305	84.867	95.894	79.251	62.852	77.253	93.724	93.947	82.983	87.365	95.438	94.954	81.461	91.835	85.119	89.104	86.333	89.249	90.248	93.168	82.712	89.714	86.363
	82.69	95.566	84.06	95.294	88.938	74.54	90.075	90.244	93.532	91.301	78.13	101.276	91.102	95.623	80.463	91.093	91.234	90.654	81.254	85.939	85.998	91.213	77.438	87.69	88.13	96.198	56.305	84.867	95.894	79.251	62.852	90.895	89.256	93.947	80.464	94.59	95.438	90.124	81.461	91.835	85.119	89.104	86.333	89.249	90.248	93.168	82.712	89.714	86.363
	82.69	95.566	84.06	88.702	88.938	74.54	90.075	88.403	93.532	91.301	78.13	87.358	91.102	95.623	80.463	91.093	91.234	90.654	81.254	85.939	85.998	91.213	77.438	87.69	88.13	96.198	56.305	84.867	95.894	79.251	62.852	90.895	89.256	93.947	80.464	94.59	95.438	90.124	81.461	91.835	85.119	89.104	86.333	89.249	90.248	93.168	82.712	89.714	86.363
	82.69	95.566	84.06	88.702	88.938	74.54	90.075	88.403	93.532	102.203	78.13	87.358	91.102	95.623	80.463	91.093	91.234	90.654	81.254	85.939	85.998	91.213	77.438	87.69	90.736	93.969	68.444	84.867	95.894	79.251	67.283	90.895	89.256	93.947	80.464	94.59	95.438	77.674	81.461	91.835	85.119	89.104	86.333	89.249	89.024	93.168	82.712	89.714	86.363
	82.69	95.566	84.06	88.702	88.938	74.54	90.075	89.943	93.532	102.203	78.13	87.358	91.102	95.623	80.463	91.093	91.234	90.654	81.254	85.939	85.998	91.213	77.438	87.69	90.736	90.49	68.444	84.867	95.894	84.062	67.283	90.895	97.757	93.947	82.569	92.148	95.438	77.674	81.461	91.835	85.119	89.104	86.333	89.249	89.024	93.168	82.712	89.714	86.363
	82.69	95.566	84.06	88.702	88.938	74.54	90.075	89.943	93.532	102.203	78.13	87.358	91.102	95.623	68.687	91.093	91.234	90.654	81.254	85.939	85.998	91.213	77.438	87.69	90.736	90.49	68.444	84.867	95.894	84.062	67.283	90.895	97.757	93.947	82.569	92.148	98.474	86.024	81.461	91.835	85.119	89.104	86.333	89.249	89.024	93.168	82.712	89.714	86.363
	82.69	95.566	84.06	84.475	90.08	79.787	90.075	89.943	84.698	102.203	78.13	87.358	91.102	95.623	68.687	91.093	91.234	90.654	81.254	85.939	85.998	91.213	77.438	87.69	90.736	90.49	70.892	84.867	95.894	84.062	67.283	90.895	97.757	93.947	82.569	92.148	98.474	86.024	81.461	91.835	85.119	89.104	86.333	89.249	89.024	93.168	82.712	89.714	86.363
	92.824	95.566	84.06	84.475	90.08	79.787	90.075	89.943	84.698	102.203	78.13	87.358	91.102	95.623	68.687	91.093	91.234	90.654	81.254	85.939	81.533	91.213	77.438	87.69	90.736	90.49	70.892	84.867	95.894	84.062	67.283	90.895	83.88	93.947	82.569	92.148	98.474	89.229	81.461	91.835	85.119	89.104	86.333	89.249	89.024	93.168	82.712	89.714	86.363
	92.824	95.566	84.06	84.475	90.08	79.787	90.075	94.098	84.698	102.203	78.13	87.358	91.102	95.623	68.687	91.093	91.234	90.654	81.254	85.939	81.533	91.213	77.438	87.69	90.736	90.49	70.892	84.867	95.894	84.062	67.283	90.895	83.88	93.947	82.569	95.627	75.931	89.229	81.461	89.706	85.119	89.104	86.333	89.249	89.024	93.168	82.712	89.714	86.363
	92.824	95.566	84.06	84.475	90.08	79.787	90.075	94.098	84.698	102.203	78.13	87.358	84.68	95.623	68.687	91.093	91.234	90.654	81.254	85.939	81.533	91.213	77.438	87.69	90.736	90.49	70.892	84.867	95.894	88.289	67.283	90.895	83.88	93.947	82.569	95.627	75.931	89.229	81.461	89.706	85.119	89.104	86.333	89.249	89.024	93.168	82.712	89.714	86.363
	92.824	95.566	84.06	84.475	90.08	79.787	90.075	94.098	89.947	102.203	78.13	87.358	84.68	95.623	68.687	91.093	91.234	90.654	81.254	85.939	81.533	91.213	77.438	87.69	90.736	59.805	65.59	84.867	95.894	88.289	67.283	90.895	100.644	93.914	82.569	95.627	75.931	89.229	81.461	89.706	85.119	89.104	86.333	89.249	89.024	93.168	82.712	89.714	86.363
	92.824	95.566	84.06	84.475	90.08	79.787	90.075	94.098	89.947	89.005	78.13	87.358	84.68	95.623	68.687	91.093	91.234	90.654	81.254	85.939	81.533	91.213	77.438	87.69	90.736	59.805	65.59	84.867	95.894	88.289	65.575	90.895	100.644	93.914	82.569	95.627	93.774	89.229	81.461	89.706	85.119	89.104	86.333	89.249	89.024	93.168	82.712	89.714	86.363
	92.824	95.566	84.06	84.475	90.08	79.787	90.075	94.098	89.947	89.005	78.13	87.358	84.68	95.623	68.687	91.093	91.234	90.654	81.254	85.939	81.533	91.213	77.438	87.69	90.736	59.805	65.59	84.867	72.199	88.289	65.575	90.895	100.644	93.914	82.569	95.627	93.774	89.229	81.461	89.706	85.119	89.104	86.333	89.249	89.024	93.168	82.712	89.714	86.363
	92.824	95.566	84.06	84.475	90.08	79.787	90.075	94.098	89.947	89.005	78.13	87.358	84.68	95.623	76.903	91.093	91.234	90.654	81.254	85.939	81.533	91.213	77.438	87.69	90.736	59.805	71.777	84.867	72.199	88.289	65.575	90.895	79.261	93.914	80.341	89.598	93.774	89.229	81.461	89.706	85.119	89.104	86.333	89.249	89.024	93.168	82.712	89.714	86.363
	92.824	95.566	84.06	84.475	90.08	79.787	94.426	94.098	89.947	89.005	78.13	87.358	89.373	95.623	76.903	91.093	91.234	90.654	81.254	85.939	82.061	91.213	77.438	87.69	90.736	91.551	71.777	99.73	72.199	88.289	65.575	86.969	79.261	93.914	80.341	89.598	93.774	89.229	81.461	90.041	85.119	89.837	86.333	89.249	89.024	96.582	82.712	89.714	86.363
	92.824	95.566	84.06	84.475	96.122	79.787	94.426	94.098	89.947	89.005	78.13	87.358	89.373	95.623	76.903	91.093	91.234	90.654	81.254	85.939	82.061	91.213	77.438	87.69	90.736	91.551	71.777	99.73	72.199	88.289	65.575	86.969	79.261	93.914	80.341	89.598	94.741	89.229	81.461	90.041	85.119	89.837	86.333	89.249	87.913	96.582	82.712	89.714	86.363
	92.824	95.566	84.06	84.475	96.122	79.787	89.081	94.098	89.947	89.005	78.13	87.358	89.373	95.623	76.903	91.093	91.234	90.283	81.254	85.939	85.45	91.213	77.438	87.69	90.736	91.551	66.551	99.73	72.199	88.289	65.575	86.969	79.261	93.914	80.341	89.598	94.741	89.229	81.461	90.041	85.119	89.837	86.333	89.249	87.913	84.494	82.712	89.714	86.363
	92.824	95.566	84.06	84.475	96.122	79.787	89.081	94.098	89.947	89.005	78.13	87.358	82.795	95.623	75.403	91.093	91.234	90.283	81.254	85.939	85.45	91.213	77.438	87.69	90.736	91.551	66.551	99.73	72.199	88.289	65.575	86.969	79.261	94.755	80.341	88.864	76.99	89.229	81.461	90.041	85.119	92.019	86.333	89.249	87.913	84.494	82.712	89.714	86.363
	92.824	95.566	84.06	84.475	96.122	79.787	89.081	94.098	89.947	89.005	78.13	87.358	82.795	95.623	75.403	91.093	91.234	90.283	81.254	85.939	85.45	91.213	77.438	87.69	90.736	91.551	66.551	99.73	72.199	88.289	65.575	86.969	79.261	94.755	80.341	88.864	76.99	89.229	81.461	90.041	98.312	92.019	86.333	89.249	87.913	84.494	82.712	89.714	86.363
	92.824	95.566	84.06	84.475	96.122	79.787	89.081	88.156	89.947	89.005	78.13	87.358	82.795	95.623	75.403	91.093	91.234	90.283	81.254	85.939	85.45	91.213	77.438	87.69	90.736	91.551	66.551	99.73	72.199	88.289	65.575	86.969	91.67	94.755	80.341	88.864	76.99	89.229	81.461	90.041	98.312	92.019	86.333	89.249	88.186	84.494	82.712	89.714	86.363
	92.824	95.566	84.06	84.475	81.508	79.787	89.081	88.156	89.947	89.005	78.13	87.358	82.795	95.623	75.133	91.093	91.234	90.283	81.254	85.939	85.45	91.213	77.438	87.69	90.736	91.551	66.551	99.73	72.199	88.289	65.575	86.969	91.67	94.755	80.341	88.864	82.728	89.229	96.183	90.041	98.312	92.019	86.333	89.249	88.186	84.494	82.712	89.714	86.363
	92.824	95.566	84.06	84.475	81.508	79.787	89.081	88.156	89.947	89.005	78.13	87.358	82.795	95.623	75.133	91.093	91.234	90.283	81.254	85.939	85.45	91.213	77.438	87.69	90.736	91.551	66.551	99.73	72.199	88.289	65.575	86.969	91.67	94.755	80.341	88.864	82.728	89.229	96.183	90.041	89.829	92.019	86.333	89.249	88.186	84.494	82.712	89.714	86.363
	92.824	95.566	84.06	94.121	81.508	79.787	89.081	90.584	89.947	89.005	78.13	87.358	82.795	92.085	71.644	91.093	91.234	88.549	81.254	85.939	102.511	91.213	77.438	87.69	90.736	91.551	66.551	99.73	72.199	88.289	65.575	86.969	86.65	94.755	80.341	88.864	94.276	89.229	96.183	90.041	89.829	90.464	86.333	89.249	88.186	84.494	82.712	89.714	86.363
	92.824	95.566	84.06	94.121	81.508	79.787	89.081	90.584	89.947	89.005	78.13	87.358	82.795	92.085	71.644	91.093	91.234	88.549	81.254	85.939	102.511	95.657	77.438	87.69	90.736	98.101	66.551	99.73	82.035	88.289	65.575	86.969	86.65	94.755	80.341	88.864	94.276	89.229	96.183	90.041	89.829	90.464	86.333	89.249	88.186	84.494	82.712	89.714	86.363
	92.824	95.566	84.06	94.121	81.508	79.787	89.081	90.584	89.947	89.005	78.13	91.309	101.076	92.085	72.03	91.093	91.234	88.549	81.254	90	102.511	95.657	77.438	87.69	90.736	98.101	66.551	99.73	82.035	88.289	65.575	86.969	86.65	94.755	83.743	88.864	94.276	89.229	96.183	90.041	89.829	90.464	86.333	89.249	88.186	84.494	82.712	89.714	92.68
	92.824	95.566	84.06	94.121	81.508	79.787	89.081	90.584	89.947	89.005	74.282	91.309	101.076	92.085	72.03	91.093	91.234	88.549	81.254	90	102.511	95.657	77.438	87.69	90.736	98.101	56.466	99.73	82.035	88.289	65.575	86.969	86.65	94.755	83.743	88.864	94.276	89.229	96.183	90.041	89.829	90.464	86.333	89.249	88.186	84.494	82.712	89.714	92.68
	92.824	95.566	84.06	94.121	88.944	79.787	89.081	92.246	89.947	89.005	74.282	91.309	101.076	92.085	72.03	91.093	88.97	88.549	81.254	90	107.436	95.657	77.438	87.69	90.736	98.101	56.466	99.73	90.987	88.289	65.575	94.857	91.109	94.755	83.743	88.864	94.276	89.229	96.183	90.041	89.829	90.464	86.333	89.249	88.186	84.494	82.712	89.714	92.68
	92.824	95.566	82.984	94.121	88.944	79.787	89.081	92.246	89.947	89.005	74.282	91.309	101.076	92.085	72.03	91.093	88.97	88.549	81.254	90	107.436	95.657	77.438	87.69	90.736	98.101	56.466	99.73	90.987	88.289	65.575	94.857	91.109	94.755	83.743	88.864	94.276	89.229	96.183	90.041	89.829	90.464	86.333	89.249	88.186	84.494	82.712	89.714	92.68
	92.824	95.566	82.984	94.121	88.944	79.787	89.081	89.203	89.947	91.579	74.282	91.309	101.076	92.085	77.69	91.093	88.97	88.549	81.254	90	107.436	95.657	77.438	87.69	90.736	98.101	56.466	99.73	90.987	88.289	65.575	94.442	91.109	94.755	83.743	88.864	94.276	89.229	94.477	90.041	89.829	90.464	86.333	89.249	88.186	84.494	82.712	89.714	92.68
	92.824	95.566	82.649	94.121	88.944	79.787	89.081	89.203	89.947	91.579	74.282	91.309	87.547	86.251	77.69	91.093	88.97	88.549	81.254	90	87.333	95.657	77.438	87.69	90.736	85.385	62.201	99.73	90.987	88.289	65.575	94.442	91.109	94.755	83.743	88.864	94.276	89.229	94.477	90.041	89.829	90.464	86.333	89.249	88.186	84.494	82.712	89.714	92.68
	92.824	95.566	82.649	94.121	88.944	79.787	89.081	89.203	89.947	91.579	74.282	91.309	87.547	86.251	77.69	91.093	88.504	88.549	81.254	90	87.333	95.657	77.438	87.69	90.736	85.385	62.201	99.73	90.987	88.289	65.575	82.288	91.109	94.755	76.841	88.864	94.276	89.229	94.477	90.041	89.829	90.464	86.333	89.249	88.186	94.644	82.712	89.714	92.68
	92.824	95.566	82.649	94.121	88.944	79.787	89.081	89.203	89.947	102.032	74.282	91.309	89.455	86.251	77.69	91.093	88.504	88.549	81.254	90	87.333	95.657	77.438	87.69	90.736	92.394	73.655	99.73	90.987	88.289	65.575	82.288	93.029	94.755	76.841	88.864	94.276	89.229	94.477	90.041	89.829	90.464	86.333	89.249	88.186	94.644	82.712	89.714	92.68
	92.824	95.566	82.649	94.121	88.944	79.787	89.081	89.203	89.947	102.032	74.282	91.309	89.455	86.251	77.69	91.093	88.504	88.549	81.254	90	87.333	95.657	77.438	87.69	90.736	92.394	73.655	99.73	90.987	88.289	65.575	82.288	93.029	94.755	76.841	88.864	94.276	89.229	94.477	90.041	89.829	90.464	86.333	89.249	88.186	94.644	82.712	89.714	92.68
	92.824	95.566	82.649	94.121	88.944	79.787	89.081	89.203	89.947	102.032	74.282	91.309	89.455	86.251	77.69	91.093	88.504	88.549	81.254	90	82.299	95.657	77.438	87.69	90.736	92.394	73.655	99.73	90.987	88.289	65.575	82.288	93.029	94.755	76.841	88.864	94.276	89.229	94.477	90.041	89.829	90.464	86.333	89.249	88.186	94.644	82.712	89.714	92.68
	92.824	95.566	82.649	94.121	88.944	79.787	89.081	89.203	89.947	102.032	74.282	91.309	89.455	86.251	77.69	91.093	88.504	88.549	81.254	90	82.299	95.657	77.438	87.69	90.736	92.394	71.175	108.315	90.987	88.289	65.575	82.288	93.029	95.632	76.841	88.864	94.276	89.229	91.117	90.041	89.829	90.464	86.333	89.249	88.186	94.644	82.712	89.714	92.68
	92.824	95.566	82.649	94.121	88.944	79.787	89.081	89.203	88.803	102.032	74.282	91.309	80.886	86.251	77.69	91.093	88.504	88.549	81.254	90	82.299	95.657	76.999	87.69	90.736	92.394	71.175	108.315	90.987	88.289	65.575	82.288	93.029	95.632	76.841	88.864	70.857	89.229	91.117	90.041	89.829	90.464	86.333	89.249	93.274	94.644	82.712	89.714	92.68
	92.824	95.566	76.317	94.121	88.944	79.787	89.081	89.613	88.803	102.032	74.282	91.309	80.886	86.251	77.69	91.093	88.504	88.549	81.254	90	98.215	95.657	76.999	87.69	90.736	98.769	71.175	108.315	90.987	88.289	65.575	82.288	93.029	95.632	76.841	88.864	70.857	89.229	91.117	90.041	89.829	90.464	86.333	89.249	93.274	94.644	82.712	89.714	92.68
	92.824	95.566	76.317	80.73	88.944	79.787	89.081	89.613	90.932	102.032	74.282	91.309	94.769	86.251	77.69	91.093	88.504	88.549	81.254	90	98.215	95.657	76.999	87.69	90.736	101.957	71.175	108.315	90.987	88.289	65.575	82.288	93.029	95.632	76.841	96.553	85.126	88.421	91.117	90.041	89.829	90.464	86.333	89.249	93.274	94.644	82.712	89.714	92.68
	92.824	95.566	76.317	80.73	88.944	79.787	89.081	89.613	90.932	102.032	74.282	91.309	94.769	86.251	77.69	91.093	88.504	88.549	81.254	89.996	92.94	95.657	76.999	87.69	90.736	101.957	71.175	108.315	90.987	88.289	54.823	82.288	93.029	95.632	81.83	96.553	85.126	88.421	91.117	90.041	89.829	90.464	86.333	89.249	93.274	94.644	82.712	89.714	92.68
	92.824	95.566	76.317	80.73	88.944	79.787	89.081	89.613	90.932	102.032	74.282	91.309	92.952	86.251	80.18	91.093	88.504	88.549	81.254	89.996	92.94	95.657	76.999	87.69	90.736	101.957	123.288	108.315	90.987	88.289	54.823	82.288	93.029	95.632	81.83	96.553	85.126	88.421	91.117	90.041	89.829	90.464	86.333	89.249	93.274	94.644	82.712	89.714	92.68
	92.824	95.566	76.317	89.936	91.592	79.787	89.081	89.613	90.932	102.032	74.282	91.309	92.952	86.251	80.18	91.093	88.504	88.549	81.254	89.996	92.94	95.657	76.999	87.69	90.736	99.525	123.288	113.773	90.987	88.289	54.823	82.288	93.029	95.632	81.83	88.87	85.126	88.421	91.117	90.041	89.829	90.464	86.333	89.249	89.072	94.644	82.712	89.714	92.68
	92.824	95.566	83.964	89.936	91.592	79.787	89.081	89.613	89.801	102.032	74.282	91.309	92.952	86.251	80.18	91.093	88.504	88.549	81.254	89.996	92.94	95.657	76.999	87.69	90.736	99.525	99.431	113.773	82.576	88.289	54.823	82.288	89.868	95.632	81.83	88.87	99.783	88.421	91.117	90.041	107.971	90.464	86.333	89.249	89.072	94.644	82.712	89.714	92.68
	92.824	95.566	83.964	89.936	91.592	79.787	89.081	89.613	89.801	102.032	74.282	91.309	92.952	86.251	80.18	91.093	88.504	84.002	81.254	89.996	92.94	95.657	76.999	87.69	90.736	99.525	99.431	113.773	82.576	88.289	54.823	82.288	89.868	95.632	81.83	88.87	99.783	88.421	91.117	90.041	90.301	90.464	86.333	89.249	89.072	94.644	82.712	89.714	92.68
	92.824	95.566	83.964	89.936	91.592	79.787	89.081	91.6	89.801	87.46	74.282	91.309	92.952	86.251	80.18	91.093	88.504	84.002	81.254	89.996	92.94	95.657	76.999	87.69	90.736	99.287	99.431	94.262	91.851	88.289	54.823	82.288	89.868	95.632	81.83	88.87	80.154	88.421	91.117	90.041	90.301	90.464	86.333	89.249	101.92	84.61	82.712	89.714	92.68
	92.824	95.566	83.964	89.936	91.592	79.787	89.081	91.6	89.801	87.46	74.282	91.309	92.952	86.251	80.18	91.093	88.504	84.002	81.254	89.996	96.339	95.657	76.999	87.69	90.736	99.287	97.072	94.262	91.851	88.289	54.823	82.288	89.868	93.11	81.83	88.87	80.154	88.421	91.117	90.041	90.301	90.464	86.333	89.249	101.92	84.61	82.712	89.714	92.68
	92.824	95.566	83.964	89.936	91.592	79.787	89.081	91.6	89.063	87.46	74.282	91.309	92.952	86.251	80.18	91.093	88.504	84.002	81.254	89.996	96.339	95.657	76.999	87.69	90.736	99.287	97.072	94.262	91.851	88.289	54.823	82.288	89.868	93.11	81.83	88.87	80.154	88.421	91.117	90.041	90.301	90.464	86.333	89.249	101.92	84.61	82.712	89.714	92.68
	92.824	95.566	83.964	89.936	91.592	79.787	89.081	91.6	89.063	87.46	74.282	91.309	92.952	86.251	80.18	91.093	88.504	92.74	81.254	89.996	96.339	95.657	76.999	87.69	90.736	99.287	97.072	94.262	91.851	88.289	54.823	82.288	89.868	93.11	81.83	88.87	80.154	88.421	91.117	90.041	90.301	90.464	86.333	89.249	85.796	84.61	82.712	89.714	92.68
	92.824	95.566	83.964	89.936	91.592	79.787	89.081	91.6	89.063	87.809	74.282	91.309	92.952	86.251	80.18	91.093	88.504	92.74	81.254	89.996	76.445	95.657	76.999	87.69	90.736	99.287	97.072	86.824	91.851	88.289	54.823	82.288	89.868	94.568	81.83	88.87	80.154	88.421	91.117	90.041	90.301	90.464	86.333	89.249	85.796	99.301	82.712	89.714	92.68
	92.824	95.566	83.964	89.936	91.592	79.787	89.081	91.6	89.063	87.809	74.282	91.309	92.952	86.251	80.18	91.093	88.504	92.74	81.254	89.996	76.445	95.657	76.999	87.69	90.736	99.287	95.342	86.824	91.851	88.289	54.823	82.288	89.868	94.568	81.83	88.87	80.154	88.421	91.117	90.041	90.301	90.464	86.333	89.249	85.796	99.301	82.712	89.714	92.68
	92.824	95.566	71.871	89.936	91.592	79.787	89.081	91.6	89.063	87.809	74.282	91.309	96.017	86.251	80.18	91.093	88.504	92.74	81.254	90.002	90	95.657	76.999	87.69	90.736	99.287	95.342	86.824	91.851	88.289	54.823	82.288	89.868	94.568	81.83	88.87	80.154	88.421	91.117	90.041	90.301	90.464	86.333	89.249	94.395	99.301	82.712	89.714	92.68
	92.824	95.566	71.871	89.936	91.592	79.787	89.081	91.6	89.063	87.809	74.282	91.309	96.017	86.251	80.18	91.093	88.504	92.74	81.254	90.002	90	92.701	76.999	87.69	90.736	99.287	95.342	86.824	91.851	88.289	54.823	94.828	89.868	94.568	81.83	88.87	94.68	88.421	91.117	90.041	90.301	90.464	86.333	89.249	94.395	99.301	82.712	89.714	92.68
	92.824	95.566	71.871	89.936	91.592	79.787	75.788	91.6	89.063	87.809	74.282	91.309	96.017	86.251	80.18	91.093	88.504	92.74	81.254	90.002	90	92.701	76.999	87.69	90.736	99.287	95.342	86.824	91.851	88.289	54.823	94.828	89.868	94.568	81.83	88.87	94.68	88.421	91.117	90.041	90.301	90.464	86.333	89.249	94.395	99.301	82.712	89.714	92.68
	92.824	95.566	71.871	89.936	93.874	79.787	75.788	91.6	89.063	87.809	74.282	91.309	96.017	86.251	80.18	91.093	88.504	92.74	81.254	90.002	90	92.701	76.999	87.69	90.736	99.287	95.342	86.824	91.851	88.289	54.823	94.828	89.868	94.568	81.83	88.87	94.68	88.421	91.117	90.018	90.301	90.464	86.333	89.249	94.395	99.301	82.712	89.714	92.68
	92.824	95.566	71.871	89.936	93.874	79.787	75.788	91.6	89.063	86.676	74.282	91.309	96.017	86.251	80.18	91.093	88.504	92.74	81.254	90.002	90	92.701	76.999	87.69	90.736	99.287	95.342	86.824	91.851	88.289	54.823	94.828	89.868	94.568	81.83	87.107	94.68	88.421	91.117	90.018	90.301	90.464	86.333	89.249	94.395	105.505	82.712	89.714	92.68
	92.824	95.566	71.871	88.435	93.874	79.787	75.788	91.6	89.063	97.73	74.282	91.309	96.017	86.251	80.18	91.093	88.504	92.74	81.254	90.002	90	92.701	76.999	87.69	90.736	99.287	95.342	86.824	91.851	88.289	54.823	94.828	89.868	94.568	81.83	87.107	94.68	88.421	91.117	90.018	90.301	90.464	86.333	89.249	94.395	105.505	82.712	89.714	92.68
	92.824	95.566	73.997	88.435	93.874	79.787	75.788	91.6	89.063	97.73	74.282	91.309	90.469	86.251	80.18	91.093	88.504	92.74	81.254	90.002	90	92.701	76.999	87.69	90.736	99.287	95.342	86.824	96.25	88.289	54.823	94.828	89.868	94.568	81.83	87.107	92.163	88.421	91.117	90.018	90.301	90.464	86.333	89.249	94.395	105.505	82.712	89.714	92.68
	92.824	95.566	73.997	88.435	93.874	79.787	75.788	91.6	89.063	97.73	74.282	91.309	90.469	86.251	80.18	91.093	88.504	63.555	81.254	90.002	90	92.701	76.999	87.69	90.736	99.287	95.342	86.824	96.25	88.289	59.046	94.828	89.868	94.568	81.83	87.107	92.163	88.421	91.117	90.018	90.301	90.464	86.333	89.249	94.395	105.505	82.712	89.714	92.68
	92.824	95.566	73.997	88.435	93.874	79.787	75.788	91.6	89.063	97.73	74.282	91.309	87.318	86.251	80.18	91.093	88.504	63.555	81.254	90.002	98.011	92.701	76.999	87.69	90.736	99.287	95.342	86.824	96.25	88.289	59.046	94.828	89.868	94.568	81.83	87.107	92.163	88.421	91.117	90.018	90.301	90.464	86.333	89.249	94.395	105.505	82.712	89.714	107.577
	92.824	95.566	73.997	88.435	93.874	79.787	75.788	91.6	98.366	97.73	74.282	91.309	87.318	86.251	80.18	91.093	88.504	63.555	81.254	90.002	98.011	92.701	76.999	87.69	90.736	99.287	95.342	86.824	96.25	88.289	59.046	94.828	89.868	94.568	81.83	87.107	92.163	88.421	91.117	90.018	90.301	90.464	86.333	89.249	94.395	100.341	82.712	89.714	107.577
	92.824	95.566	73.997	93.61	93.874	79.787	75.788	91.6	98.366	97.73	74.282	91.309	87.318	86.251	80.18	91.093	88.504	84.83	81.254	90.002	98.011	92.701	76.999	87.69	90.736	99.287	95.342	86.824	96.25	88.289	60.4	94.828	89.868	94.568	81.83	87.107	92.163	88.421	91.117	90.018	90.301	90.464	86.333	89.249	94.395	100.341	82.712	89.714	107.577
	92.824	95.566	73.997	93.61	93.874	79.787	75.788	91.6	98.366	97.73	74.282	91.309	87.318	86.251	80.18	91.093	88.504	84.83	81.254	90.002	98.011	92.701	76.999	87.69	90.736	99.287	95.342	86.824	90.978	88.289	60.4	94.828	89.868	94.568	81.83	87.107	92.163	88.421	91.117	90.018	90.301	90.464	86.333	89.249	94.395	100.341	82.712	89.714	88.484
	92.824	95.566	73.997	93.61	93.874	79.787	75.788	91.6	83.973	103.969	74.282	91.309	87.318	86.251	80.18	91.093	88.504	84.83	81.254	90.002	98.011	92.701	76.999	87.69	90.736	99.287	95.342	86.824	90.978	88.289	60.4	89.089	89.868	102.669	81.83	90.357	92.163	88.421	91.117	90.018	90.301	90.464	86.333	89.249	94.395	100.341	82.712	89.714	88.484
	92.824	95.566	73.997	93.61	93.874	79.787	75.788	91.6	83.973	103.969	74.282	91.309	87.318	86.251	80.18	91.093	88.504	84.83	81.254	90.002	98.011	92.701	76.999	87.69	90.736	94.282	95.342	86.824	90.978	88.289	60.4	89.089	89.868	102.669	81.83	90.357	92.163	88.421	91.117	93.673	90.301	90.464	86.333	89.249	94.395	100.341	82.712	89.714	88.484
	92.824	95.566	73.997	93.61	93.874	79.787	75.788	91.6	84.931	79.835	74.282	91.309	87.318	86.251	80.18	91.093	88.504	84.83	81.254	90.002	98.011	92.701	76.999	87.69	90.736	94.282	100.558	86.824	90.978	88.289	60.4	89.089	90.876	102.669	81.83	90.357	92.163	88.421	91.117	93.673	90.301	90.464	83.278	89.249	94.395	100.341	82.712	89.714	88.484
	92.824	95.566	79.19	93.61	90	79.787	75.788	91.6	84.931	79.835	74.282	91.309	87.318	86.251	80.18	91.093	88.504	87.798	81.254	90.002	86.893	92.701	76.999	87.69	90.736	94.282	93.974	86.824	90.978	88.289	60.4	89.089	90.876	84.677	81.83	91.954	92.163	88.421	91.117	73.179	90.301	90.464	83.278	89.249	94.395	97.708	82.712	89.714	88.484
	92.824	95.566	79.19	93.61	90	79.787	75.788	91.6	84.931	79.835	74.282	91.309	87.318	86.251	72.271	91.093	88.504	87.798	81.254	90.002	86.893	92.701	76.999	87.69	90.736	94.282	93.974	86.824	90.978	88.289	60.4	89.089	90.876	84.677	81.83	91.954	92.163	88.421	91.117	93.889	92.921	90.464	83.278	89.249	94.395	97.708	82.712	89.714	88.484
	92.824	95.566	79.19	90.773	90	79.787	75.788	91.6	84.931	79.835	74.282	91.309	87.318	86.251	72.271	91.093	88.504	87.798	81.254	90.002	86.893	92.701	76.999	87.69	90.736	94.282	93.974	86.824	90.978	88.289	60.4	89.089	90.876	84.677	81.83	91.954	92.163	88.421	91.117	114.264	92.921	90.464	83.278	89.249	94.395	97.708	82.712	89.714	88.484
	92.824	95.566	78.026	90.773	90	69.728	75.788	91.6	84.931	79.835	74.282	91.309	87.318	86.251	72.271	91.093	88.504	87.798	81.254	90.002	86.893	92.701	76.999	87.69	90.736	94.282	93.974	86.824	90.978	88.289	48.045	89.089	90.876	95.363	81.83	91.954	92.163	88.421	91.117	114.264	92.921	90.464	83.278	89.249	94.395	97.708	82.712	89.714	88.484
	92.824	95.566	78.026	90.773	90	69.728	75.788	91.6	84.931	79.835	74.282	91.309	88.765	86.251	72.271	91.093	88.504	88.832	81.254	90.002	86.893	92.701	76.999	87.69	90.736	94.282	93.974	86.824	90.978	88.289	48.045	89.089	90.876	95.363	81.83	91.954	92.163	88.421	91.117	114.264	92.921	90.464	83.278	89.249	94.395	97.708	82.712	89.714	88.484
	92.824	95.566	78.026	90.773	90	69.728	75.788	91.6	90.349	79.835	74.282	91.309	88.765	86.251	66.599	91.093	88.504	88.832	81.254	90.002	86.893	92.701	76.999	87.69	90.736	94.282	93.974	86.824	90.978	88.289	48.045	89.089	90.876	95.363	81.83	91.954	92.163	88.421	91.117	114.264	92.921	90.464	83.278	89.249	94.395	97.708	82.712	89.714	88.484
	92.824	95.566	78.026	90.773	90	69.728	75.788	91.6	90.349	79.835	74.282	91.309	88.765	86.251	66.599	91.093	96.703	88.832	81.254	90.002	86.893	92.701	76.999	87.69	90.736	94.282	93.974	86.824	90.978	88.289	48.045	89.089	90.876	92.215	81.83	91.954	92.163	88.421	91.117	114.264	92.921	90.464	83.278	89.249	94.395	97.708	82.712	89.714	88.484
	92.824	95.566	78.026	90.773	90	69.392	75.788	91.6	90.349	79.835	74.282	91.309	88.765	86.251	66.599	91.093	96.703	88.832	81.254	90.002	86.893	92.701	76.999	87.69	90.736	94.282	93.974	86.824	90.978	88.289	48.045	89.089	90.876	92.215	81.83	91.954	92.163	88.421	91.117	90.313	92.921	90.464	83.278	89.249	94.395	97.708	82.712	89.714	88.484
	92.824	95.566	84.987	90.773	90	69.392	75.788	91.6	90.349	69.024	74.282	91.309	88.765	86.251	66.599	91.093	96.703	88.832	81.254	90.002	86.893	92.701	76.999	87.69	90.736	94.282	93.974	86.824	90.978	88.289	48.045	89.089	90.876	92.215	81.83	91.954	92.163	88.421	91.117	90.313	92.921	90.464	83.278	89.249	94.395	93.263	82.712	89.714	88.484
	92.824	95.566	84.987	90.773	90	90.16	75.788	91.6	75.537	69.024	74.282	91.309	88.765	86.251	69.745	91.093	89.182	88.832	81.254	94.67	86.893	92.701	76.999	87.69	90.736	94.282	93.974	86.824	90.978	88.289	73.269	89.089	90.876	92.215	79.233	91.954	92.163	88.421	91.117	90.313	92.921	90.464	83.278	89.249	94.395	93.263	82.712	89.714	88.484
	92.824	95.566	84.987	90.773	90	90.16	75.788	91.6	75.537	69.024	74.282	91.309	88.765	86.251	69.745	91.093	89.182	88.832	81.254	94.67	86.893	92.701	76.999	87.69	90.736	94.282	93.974	86.824	90.978	88.289	73.269	89.089	90.876	92.215	79.233	76.294	92.163	88.421	91.117	90.313	92.921	90.464	83.278	89.249	94.395	93.263	82.712	89.714	88.484
	92.824	95.566	84.987	90.773	90	90.16	75.788	91.6	75.537	69.024	74.282	91.309	88.765	86.251	69.745	91.093	89.182	88.832	81.254	94.67	86.893	92.701	76.999	87.69	90.736	94.282	93.974	86.824	90.978	88.289	67.788	85.371	90.876	92.215	79.233	76.294	92.163	88.421	91.117	90.313	92.921	90.464	83.278	89.249	94.395	93.263	82.712	89.714	88.484
	92.824	95.566	84.987	90.773	90	90.16	75.788	91.6	75.537	69.024	74.282	91.309	88.765	86.251	75.546	91.093	89.182	88.832	81.254	94.67	86.893	92.701	76.999	87.69	90.736	94.282	93.974	86.824	90.978	88.289	67.788	85.371	90.876	92.215	79.233	76.294	92.163	88.421	91.117	90.313	92.921	90.464	83.278	89.249	94.395	93.263	82.712	89.714	88.484
	92.824	95.566	78.12	94.394	90	90.16	75.788	91.6	75.537	69.024	74.282	91.309	88.765	86.251	75.546	91.093	89.182	88.832	81.254	94.67	86.893	92.701	76.999	87.69	90.736	94.282	93.974	86.824	90.978	88.289	67.788	85.371	90.876	90.176	79.233	76.294	92.163	88.421	91.117	86.123	92.921	90.464	83.278	89.249	86.684	93.263	82.712	89.714	88.484
	92.824	95.566	78.12	94.394	90	90.16	75.788	91.6	75.537	87.754	74.282	91.309	88.765	86.251	75.546	91.093	88.807	88.832	81.254	94.67	86.893	92.701	76.999	87.69	90.736	94.282	93.974	86.824	90.978	88.289	67.788	85.371	90.876	90.176	79.233	76.294	92.163	88.421	91.117	86.123	92.921	90.464	83.278	89.249	86.684	93.263	82.712	89.714	88.484
	92.824	95.566	78.12	94.394	90	80.092	75.788	91.6	91.681	87.754	74.282	91.309	88.765	86.251	75.546	91.093	88.807	88.832	81.254	94.67	86.893	92.701	76.999	87.69	90.736	94.282	93.974	82.796	90.978	88.289	67.788	85.371	90.876	91.554	79.233	79.422	92.163	88.421	91.117	86.123	92.921	90.464	83.278	89.249	86.684	93.263	82.712	89.714	88.484
	92.824	95.566	78.12	94.394	90	80.092	75.788	91.6	91.681	87.754	74.282	91.309	88.765	86.251	75.546	91.093	88.807	88.832	81.254	94.67	86.893	92.701	76.999	87.69	90.736	94.282	93.974	82.796	90.978	88.289	67.788	85.371	90.876	91.554	79.233	79.422	92.163	88.421	91.117	86.123	92.921	90.464	83.278	89.249	86.684	93.263	82.712	89.714	88.484
	92.824	95.566	78.12	94.394	90	80.092	75.788	91.6	84.908	87.754	74.282	91.309	88.765	86.251	75.546	91.093	88.807	88.832	81.254	94.67	86.893	92.701	76.999	87.69	90.736	94.282	93.974	82.796	90.978	88.289	67.788	85.371	90.513	91.554	79.233	79.422	92.163	88.421	91.117	86.123	92.921	90.464	83.278	89.249	86.684	93.263	82.712	89.714	82.015
	92.824	95.566	78.12	94.394	90	86.053	75.788	88.927	84.908	87.754	74.282	91.309	88.765	86.251	75.546	91.093	88.807	88.832	81.254	94.67	90	92.701	76.999	87.69	90.736	94.282	97.906	82.796	90.978	88.289	67.788	85.371	90.513	91.554	79.233	90.555	92.163	88.421	91.117	86.123	92.921	90.464	83.278	89.249	86.684	93.263	82.712	89.714	82.015
	92.824	95.566	78.12	94.394	90	86.053	75.788	88.927	84.908	87.754	74.282	82.915	88.765	86.251	75.546	91.093	88.807	88.832	81.254	85.434	90	93.882	76.999	87.69	90.736	94.282	97.906	82.796	90.978	88.289	67.788	89.703	90.513	91.554	79.233	90.555	92.163	88.421	91.117	86.123	92.921	90.464	83.278	89.249	86.684	93.263	82.712	89.714	82.015
	92.824	95.566	78.12	94.394	90	86.053	75.788	88.927	84.908	87.754	74.282	82.915	88.765	86.251	75.546	91.093	88.807	88.832	81.254	85.434	90	93.882	69.96	87.69	90.736	94.282	70.293	82.796	90.978	88.289	67.788	89.703	90.513	91.554	79.233	90.555	92.163	88.421	91.117	86.123	92.921	90.464	83.278	89.249	86.684	93.263	82.712	89.714	82.015
	92.824	95.566	78.12	94.394	90	86.053	75.788	88.927	84.908	87.754	74.282	82.915	82.533	86.251	75.546	91.093	88.563	88.832	81.254	85.434	90	93.882	69.96	81.531	90.736	94.282	70.293	82.796	90.978	88.289	67.788	89.703	90.513	91.554	79.233	90.555	92.163	88.421	91.117	86.123	92.921	90.464	83.278	89.249	86.684	93.263	82.712	89.714	82.015
	92.824	95.566	78.12	94.394	90	86.053	81.38	90.123	84.908	87.754	74.282	78.519	82.533	86.251	75.546	91.093	88.563	88.832	81.254	85.434	90	93.882	69.96	81.531	90.736	94.282	70.293	82.796	90.978	88.289	67.788	89.703	87.794	91.554	79.233	87.084	92.163	88.421	91.117	86.123	92.921	90.464	83.278	90.486	86.684	93.263	82.712	89.714	92.495
	92.824	95.566	78.12	94.394	87.112	86.053	81.38	90.123	84.908	87.754	74.282	78.519	93.63	86.251	75.546	91.093	88.563	87.573	81.254	85.434	90	93.882	69.96	81.531	90.736	94.282	70.293	82.796	90.978	88.289	67.788	89.703	87.794	91.554	79.233	87.084	92.163	88.421	91.117	86.123	92.921	90.464	83.278	90.486	86.684	93.263	82.712	89.714	92.495
	92.824	95.566	78.12	94.394	87.112	86.053	81.38	88.784	84.296	87.754	74.282	78.519	93.63	86.251	75.546	91.093	88.563	87.573	81.254	85.434	90	93.882	69.96	81.531	90.736	94.282	70.293	82.796	90.978	88.289	67.788	89.703	87.794	91.554	79.233	87.084	92.163	88.421	91.117	86.123	92.921	90.464	83.278	90.486	86.684	93.263	82.712	89.714	92.495
	92.824	95.566	78.12	94.394	94.447	86.053	81.38	88.784	84.296	87.754	74.282	78.519	93.63	86.251	75.546	91.093	96.214	83.993	81.254	85.434	90	93.882	69.96	81.531	90.736	94.282	70.293	96.581	90.978	88.289	67.788	89.703	87.794	91.554	81.254	87.084	92.163	88.421	91.117	86.123	92.921	90.464	83.278	90.486	86.684	93.263	82.712	89.714	92.495
	92.824	95.566	78.12	94.394	94.447	86.053	81.38	88.784	84.296	96.691	74.282	104.517	93.63	86.251	81.427	91.093	96.214	83.993	81.254	85.434	77.92	93.882	69.96	81.531	90.736	94.282	70.293	96.581	90.978	88.289	67.788	89.703	87.794	91.554	81.254	87.084	92.163	88.421	91.117	86.123	92.921	90.464	83.278	90.486	86.684	93.263	82.712	89.714	92.495
	92.824	95.566	78.12	94.394	94.447	86.053	81.38	88.784	90.164	96.691	74.282	104.517	93.63	86.251	81.427	91.093	96.214	83.993	81.254	113.586	77.92	93.882	69.96	81.531	90.736	99.286	73.302	96.581	91.577	88.289	67.788	89.703	87.794	91.554	81.254	87.084	92.163	88.421	91.117	86.123	92.921	90.464	83.278	90.486	86.684	93.263	82.712	89.714	92.495
	92.824	95.566	78.12	85.836	94.447	86.053	81.38	88.784	90.164	96.691	74.282	91.467	93.63	86.251	81.427	91.093	96.214	83.993	81.254	113.586	112.15	93.882	69.96	81.531	90.736	99.286	73.302	95.371	91.577	88.289	67.788	89.703	87.794	91.554	81.254	87.084	92.163	88.421	91.117	86.123	92.921	90.464	74.732	90.486	86.684	93.263	82.712	89.714	87.787
	92.824	95.566	78.12	85.836	94.447	78.015	81.38	88.784	90.164	96.691	74.282	91.467	93.63	86.251	81.427	91.093	96.214	83.993	81.254	113.586	112.15	93.882	69.96	81.531	90.736	99.286	75.443	95.371	91.577	88.289	67.788	89.703	83.54	91.554	81.254	87.084	92.163	88.421	91.117	86.123	92.921	90.464	74.732	90.486	86.684	93.263	82.712	89.714	87.787
	92.824	95.566	78.12	85.836	89.122	78.015	85.539	88.784	90.164	96.691	74.282	91.467	85.733	86.251	81.427	91.093	96.214	83.993	81.254	85.432	112.15	93.882	69.96	81.531	90.736	99.286	75.443	95.371	91.577	88.289	67.788	89.703	83.54	91.554	82.913	87.084	92.163	88.421	91.117	86.123	92.921	90.464	76.658	90.486	86.684	93.263	82.712	89.714	87.787
	92.824	95.566	78.12	85.836	89.122	78.015	85.539	88.784	90.164	86.323	74.282	91.467	85.733	86.251	81.427	91.093	96.214	83.993	81.254	85.432	103.207	93.882	69.96	81.531	90.736	99.286	75.443	95.371	91.577	88.289	67.788	89.703	94.741	90.384	82.913	87.084	92.163	88.421	91.117	97.987	92.921	90.464	76.658	90.486	86.684	93.263	82.712	89.714	87.787
	92.824	91.887	78.12	85.836	89.122	78.015	82.512	88.784	90.164	86.323	74.282	91.467	95.47	86.251	81.427	91.093	96.214	83.993	81.254	85.432	103.207	93.882	69.96	81.531	90.736	99.286	75.443	95.371	91.577	88.289	67.788	89.703	94.741	90.384	82.913	87.084	92.163	88.421	91.117	97.987	92.921	90.464	76.658	90.486	86.684	87.393	82.712	89.714	87.787
	92.824	91.887	78.12	85.836	89.122	78.015	82.512	88.784	90.164	86.323	74.282	91.467	95.47	86.251	81.427	91.093	96.214	83.993	81.275	85.432	77.858	93.882	67.111	81.531	90.736	99.286	75.443	95.371	91.577	88.289	74.573	89.703	94.741	90.384	82.913	87.084	92.163	88.421	91.117	97.987	92.921	90.464	76.658	90.486	86.684	87.393	82.712	89.714	87.787
	92.824	91.887	78.12	85.836	89.122	78.015	82.512	88.784	90.164	86.323	74.282	91.467	95.47	86.251	81.427	91.093	96.214	83.993	81.275	85.432	91.943	93.355	67.111	81.531	90.736	99.286	75.443	95.371	91.577	88.289	74.573	89.703	94.741	90.384	82.913	87.084	92.163	88.421	91.117	97.987	92.921	90.464	76.658	90.486	86.684	87.393	82.712	89.714	87.787
	92.824	91.887	78.12	85.836	89.122	96.812	82.512	88.784	90.164	86.323	74.282	91.467	95.47	86.251	81.427	91.093	96.214	83.993	81.275	85.432	91.943	93.355	67.111	81.531	90.736	99.286	75.443	95.371	91.577	81.488	74.573	89.703	94.741	90.384	82.913	87.084	92.163	88.421	91.117	97.987	92.921	90.464	77.819	90.486	86.684	87.393	82.712	89.714	87.787
	92.824	91.887	78.12	85.836	89.122	96.812	82.512	88.784	90.164	86.323	74.282	94.387	95.47	86.251	81.427	91.093	74.642	84.059	81.275	86.407	91.943	93.355	67.111	81.531	90.736	99.286	78.291	80.359	91.577	81.488	59.946	89.703	94.741	90.384	82.913	87.084	92.163	88.421	91.117	97.987	92.921	90.464	77.819	90.486	86.684	93.634	82.712	89.714	87.787
	92.824	91.887	75.106	85.836	92.71	96.812	82.512	88.784	90.164	86.323	74.282	94.387	95.47	79.899	81.427	91.093	74.642	84.059	81.275	86.407	91.943	93.355	67.111	81.531	90.736	99.286	75.449	80.359	91.577	81.488	59.946	89.703	87.413	90.384	82.913	87.084	92.163	88.421	91.117	97.987	92.921	90.464	77.819	90.486	86.684	93.634	82.712	89.714	87.787
	92.824	91.887	75.106	85.836	92.71	96.812	82.512	88.784	96.279	86.323	74.282	94.387	78.499	79.899	81.427	91.093	74.642	84.059	81.275	86.407	75.247	93.355	67.111	81.531	90.736	99.286	75.449	80.359	91.577	81.488	59.946	89.703	87.413	90.384	82.913	87.084	92.163	88.421	91.117	97.987	92.921	90.464	77.819	90.486	86.684	109.539	82.712	89.714	87.787
	92.824	94.903	75.106	85.836	92.71	96.812	82.512	88.784	96.279	86.323	74.282	94.387	78.499	79.899	81.427	91.093	74.642	84.059	81.275	86.407	75.247	93.355	75.471	81.531	90.736	99.286	75.449	80.359	91.577	81.488	59.946	89.703	87.413	90.384	82.913	87.084	92.163	88.421	91.117	97.987	92.921	90.464	77.819	90.486	86.684	109.539	82.712	89.714	87.787
	92.824	94.903	75.106	85.836	92.71	96.812	82.512	88.784	96.279	86.323	74.282	94.387	78.499	79.899	81.427	91.093	74.642	84.059	81.275	86.407	75.247	94.985	75.471	81.531	90.736	99.286	75.449	88.469	91.577	81.488	59.946	89.703	87.413	90.384	82.913	87.084	92.163	88.421	91.117	84.248	92.921	90.464	77.819	90.486	86.684	109.539	82.712	89.714	87.787
	92.824	94.903	75.106	85.836	92.71	96.812	82.512	88.784	96.279	86.323	74.282	94.387	78.499	79.899	81.427	91.093	91.169	84.059	81.275	86.407	75.247	94.985	75.471	81.531	90.736	99.286	75.449	88.469	91.577	81.488	75.103	89.703	87.413	90.384	82.913	87.084	92.163	88.421	91.117	84.248	92.921	90.464	77.819	90.486	86.684	109.539	82.712	89.714	87.787
	92.824	94.903	75.106	85.836	92.71	96.812	82.512	88.784	96.279	86.323	74.282	94.387	78.499	96.087	81.427	91.093	91.169	84.059	81.275	86.407	75.247	94.985	75.471	81.531	90.736	99.286	75.449	88.469	91.577	81.488	67.51	89.703	87.413	90.384	82.913	87.084	92.163	88.421	91.117	84.248	92.921	90.464	77.819	90.486	86.684	94.119	82.712	89.714	87.787
	92.824	94.903	75.106	85.836	92.71	96.812	82.512	88.784	96.279	86.323	74.282	88.187	88.148	96.087	81.427	91.093	91.169	84.059	81.275	86.407	82.102	94.985	79.535	81.531	90.736	99.286	75.449	88.469	91.577	81.488	67.51	89.703	93.04	90.384	82.913	87.084	92.163	88.421	91.117	84.248	92.921	90.464	77.819	90.486	86.684	94.119	82.712	89.714	87.787
	92.824	94.903	75.106	85.836	92.71	96.812	82.512	88.784	96.279	86.323	74.282	88.187	88.148	93.68	81.427	91.093	91.169	84.059	81.275	88.246	82.102	94.985	79.535	81.531	90.736	99.286	75.449	88.469	87.64	81.488	67.51	89.703	93.04	90.384	82.913	87.084	92.163	88.421	91.117	84.248	92.921	90.464	77.819	90.486	86.684	94.119	82.712	89.714	87.787
	92.824	94.903	75.106	87.43	82.219	96.812	82.512	88.784	96.279	86.323	74.282	88.187	88.148	93.68	81.427	91.093	91.169	84.059	81.275	88.246	82.102	94.985	79.535	81.531	90.736	99.286	75.449	88.469	87.64	81.488	77.226	93.955	75.758	90.384	82.913	87.084	92.163	88.421	91.117	84.248	92.921	90.464	77.819	90.486	86.684	96.229	82.712	89.714	87.787
	92.824	94.903	75.106	87.43	82.219	96.812	82.512	88.784	96.279	86.323	72.577	88.187	88.148	93.68	81.427	91.093	91.169	76.587	81.275	88.246	94.235	94.985	79.535	81.531	90.736	99.286	75.449	80.277	87.64	81.488	77.226	93.955	75.758	90.384	82.913	87.084	92.163	88.421	91.117	84.248	92.921	90.464	77.819	90.486	86.684	96.229	82.712	89.714	87.787
	92.824	94.903	75.106	87.43	94.105	96.812	81.582	88.784	96.279	86.323	72.577	88.187	88.148	93.68	81.427	91.093	91.169	76.587	81.275	88.246	94.235	94.985	79.535	81.531	90.736	99.286	63.277	80.277	87.64	81.488	77.226	93.955	75.758	90.384	82.913	87.084	92.163	88.421	91.117	84.248	92.921	90.464	77.819	90	86.684	96.229	82.712	89.714	87.787
	92.824	94.903	75.106	87.43	94.105	96.812	81.582	88.784	96.279	86.323	72.577	88.187	88.148	93.68	81.427	91.093	91.169	77.159	81.275	114.394	94.235	94.985	79.535	81.531	90.736	99.286	63.277	80.277	87.64	81.488	77.226	93.955	100.155	90.384	82.913	87.084	92.163	88.421	91.117	84.248	92.921	90.464	77.819	90	90.444	96.229	82.712	89.714	87.787
	92.824	94.903	75.106	87.43	94.105	74.333	81.582	88.784	96.279	86.323	72.577	89.211	88.148	93.68	81.427	91.093	91.169	77.159	81.275	114.394	94.235	94.985	79.535	81.531	90.736	99.286	84.757	80.277	87.64	81.488	77.226	93.955	100.155	90.384	82.913	85.399	88.694	88.421	91.117	84.248	92.921	90.464	77.819	90	90.444	96.229	82.712	89.714	87.787
	92.824	94.903	75.106	87.43	94.105	74.333	81.582	88.784	96.279	86.323	72.577	89.211	88.148	93.68	81.427	91.093	91.169	77.159	81.275	114.394	94.235	94.985	79.535	87.023	90.736	99.286	84.757	80.277	87.64	81.488	77.226	93.955	100.155	90.384	82.913	85.399	88.694	88.421	91.117	84.248	92.921	90.464	77.819	90	90.444	96.229	82.712	89.714	87.787
	92.824	94.903	75.106	87.43	94.105	74.333	81.582	88.784	96.279	86.323	72.501	89.211	88.148	93.68	81.427	91.093	91.169	77.159	81.275	70.155	94.235	94.985	79.535	87.023	90.736	99.286	84.757	80.277	87.64	81.488	77.226	93.955	100.155	90.384	82.913	85.399	88.694	88.421	91.117	84.248	92.921	90.464	77.819	90	90.444	96.229	82.712	89.714	87.787
	92.824	94.903	75.106	87.43	94.105	74.333	81.582	88.784	96.279	86.323	72.501	89.211	88.148	93.68	81.427	91.093	91.169	77.159	81.275	70.155	94.235	94.985	79.535	87.023	90.736	99.286	84.757	80.277	87.64	81.488	77.226	93.955	88.461	90.384	82.913	83.232	88.694	88.421	91.117	84.248	92.921	90.464	77.819	90	90.444	96.229	82.712	89.714	87.787
	92.824	94.903	83.735	87.43	93.246	74.333	81.582	88.784	96.279	86.323	72.448	89.211	88.148	93.68	81.427	91.093	90.084	77.159	81.706	70.155	94.235	94.985	63.102	87.023	90.736	99.286	84.757	80.277	87.64	81.488	77.226	93.955	88.461	90.384	82.913	83.232	88.694	88.421	91.117	84.248	92.921	90.464	77.819	90	90.444	96.229	82.712	89.714	87.787
	92.824	94.903	83.735	87.43	93.246	74.333	81.582	88.784	96.279	86.323	72.448	89.211	88.148	93.68	82.863	91.093	90.084	77.159	81.706	70.155	90.737	94.985	63.102	87.023	90.736	99.286	84.757	80.277	87.64	81.488	77.226	93.955	88.461	90.384	82.913	83.232	88.694	88.421	91.117	84.248	92.921	90.464	77.819	90	90.444	96.229	82.712	89.714	87.787
	92.824	94.903	83.735	87.43	88.108	74.333	81.582	88.784	96.279	86.323	72.448	89.211	88.148	93.68	82.863	91.093	77.868	77.159	81.706	70.155	90.737	94.985	63.102	82.466	90.736	99.286	84.757	80.277	87.64	81.488	77.226	93.955	88.461	90.384	82.913	83.232	88.694	88.421	91.117	84.248	92.921	90.464	77.819	90	90.444	96.229	82.712	89.714	87.787
	92.824	94.903	83.735	87.43	88.108	74.333	81.582	88.784	96.279	86.323	72.448	89.211	100.636	93.68	82.863	91.093	92.751	77.159	81.706	79.044	90.737	94.985	63.102	82.466	90.736	99.286	84.757	80.277	87.64	81.488	77.226	93.955	88.461	90.384	82.913	83.232	88.694	88.421	91.117	84.248	89.373	90.464	77.819	90	90.444	96.229	82.712	89.714	87.787
	92.824	94.903	83.735	91.248	88.451	74.333	81.582	88.784	96.279	86.323	72.448	89.211	100.636	93.68	82.863	91.093	92.751	77.159	81.706	79.044	90.737	94.985	63.102	84.78	90.736	99.286	84.757	80.277	87.64	81.488	77.226	93.955	88.461	90.384	82.913	83.232	88.694	88.421	91.117	87.206	89.373	90.464	77.819	90	90.444	96.229	82.712	89.714	87.787
	92.824	94.903	83.735	91.248	88.451	74.333	81.582	88.784	96.279	86.323	72.448	89.211	100.636	93.68	82.863	91.093	81.982	77.159	81.706	79.044	90.737	94.985	63.102	84.78	90.736	99.286	84.757	80.277	87.64	81.488	77.226	93.955	88.461	90.384	82.913	83.232	88.694	88.421	91.117	87.206	89.373	90.464	77.819	90	90.444	96.229	82.712	89.714	87.787
	92.824	94.903	83.735	91.248	88.451	74.333	81.582	88.784	96.279	86.323	72.448	88.376	104.244	93.68	82.863	91.093	81.982	77.159	81.706	89.775	90.737	94.985	63.102	84.78	90.736	99.286	75.375	80.277	87.64	81.488	77.226	93.955	88.461	90.384	82.913	83.232	88.694	88.421	91.117	87.206	89.373	90.464	77.819	90	90.444	96.229	82.712	89.714	87.787
	92.824	94.903	67.227	91.248	88.451	74.333	81.582	88.784	96.279	86.323	72.448	88.376	104.244	93.68	82.863	91.093	101.462	82.419	81.706	89.775	90.737	94.985	63.102	84.78	90.736	99.286	75.375	80.277	87.64	81.488	77.226	93.955	88.461	90.384	82.913	83.232	88.694	88.421	91.117	87.206	91.88	90.464	77.819	90	90.444	96.229	82.712	89.714	87.787
	92.824	94.903	67.227	80.944	88.451	74.333	81.582	88.784	94.562	86.323	72.448	88.376	94.609	93.68	82.863	91.093	101.462	82.419	81.706	89.775	84.834	94.985	63.102	84.78	90.736	99.286	75.375	90.363	87.64	81.488	77.226	93.955	88.461	90.384	82.913	83.232	88.694	88.421	91.117	87.206	91.88	90.464	77.819	90	90.444	96.229	82.712	89.714	87.787
	92.824	94.903	67.227	80.944	88.451	74.333	81.582	88.784	94.562	86.323	72.448	88.376	94.609	93.68	82.863	91.093	101.462	82.419	81.706	103.646	93.568	94.985	63.102	84.78	90.736	99.286	75.375	90.363	87.64	81.488	77.226	93.955	88.461	90.384	82.913	83.232	88.694	88.421	91.117	87.206	91.88	90.464	77.819	90	90.444	96.229	82.712	89.714	87.787
	92.824	94.903	67.227	80.944	88.451	74.333	81.582	88.784	94.562	86.323	72.448	88.376	94.609	93.68	82.863	91.093	101.462	82.419	81.706	103.646	93.568	94.985	63.102	84.78	90.736	99.286	75.375	90.363	87.64	81.488	77.226	93.955	88.461	90.384	82.913	83.232	72.993	88.421	91.117	87.206	72.891	90.464	77.819	90.064	90.444	96.229	82.712	89.714	78.638
	92.824	94.903	67.227	86.263	88.451	74.333	81.582	88.784	94.562	86.323	72.448	80.496	92.672	93.68	81.241	91.093	101.462	82.419	81.706	103.646	93.568	94.985	63.102	84.78	90.736	99.286	78.426	90.363	87.64	81.488	77.226	91.021	88.461	90.384	82.913	83.232	72.993	88.421	91.117	87.206	93.974	90.464	77.819	90.064	90.444	96.229	82.712	89.714	78.638
	92.824	94.903	67.227	86.263	90.42	74.333	81.582	88.784	91.083	86.323	72.448	80.496	92.672	93.68	81.241	91.093	101.462	84.623	81.706	91.622	97.862	94.985	63.102	84.78	90.736	97.314	78.426	90.363	87.64	81.488	73.074	91.021	88.461	90.384	82.913	108.678	72.993	88.421	91.117	87.206	93.974	90.464	77.819	87.87	90.444	96.229	82.712	89.714	78.638
	92.824	94.903	65.152	86.263	90.42	74.333	81.582	88.784	91.083	86.323	72.448	91.697	92.672	93.68	79.77	91.093	101.462	84.623	81.706	91.622	97.862	94.985	76.189	84.78	90.736	97.314	78.426	90.363	87.64	81.108	73.074	91.021	88.461	90.384	82.913	108.678	89.418	88.421	91.117	87.206	93.974	90.464	77.819	87.87	90.444	96.229	82.712	89.714	78.638
	92.824	94.903	65.152	86.263	90.42	74.333	81.582	88.784	91.083	86.323	72.448	91.697	92.672	93.68	79.77	91.093	101.462	78.54	81.706	72.765	97.862	94.985	76.189	84.78	90.736	79.135	78.426	90.363	87.64	81.108	48.376	91.021	88.461	90.384	82.913	108.678	89.418	88.421	91.117	87.206	93.974	90.464	77.819	87.87	90.444	96.229	82.712	89.714	93.076
	92.824	94.903	65.152	86.263	90.42	74.333	81.582	88.784	91.083	86.323	72.448	91.627	92.672	93.68	79.77	91.093	101.462	78.54	81.706	72.765	82.238	94.985	76.189	84.78	90.736	79.135	75.745	90.363	87.64	81.108	48.376	91.021	88.461	90.384	82.913	108.678	89.418	88.421	91.117	97.992	93.974	90.464	77.819	87.87	90.444	96.229	82.712	89.714	93.076
	92.824	94.903	65.152	86.263	90.698	74.333	81.582	88.784	79.471	86.323	72.448	91.627	92.672	93.68	79.77	91.093	85.443	78.54	81.706	72.765	82.238	94.985	76.189	86.527	90.736	79.135	75.745	90.363	87.64	81.108	48.376	91.021	88.461	90.384	82.913	108.678	89.418	88.421	91.117	97.992	93.974	90.464	77.819	87.87	90.444	96.229	82.712	89.714	93.076
	92.824	94.903	65.152	86.263	90.698	74.333	81.582	88.784	79.471	86.323	72.448	91.627	92.672	93.68	79.77	91.093	85.443	78.54	81.706	72.765	82.238	94.985	76.189	86.527	90.736	79.135	75.745	90.363	87.64	81.108	63.025	91.021	93.631	90.384	82.913	108.678	89.418	88.421	91.117	97.992	93.974	96.379	77.819	87.87	90.444	96.229	82.712	89.714	86.84
	92.824	94.903	65.152	86.263	88.833	74.333	81.582	88.784	73.149	86.323	68.208	91.627	92.672	93.68	79.77	91.093	85.443	78.54	81.706	72.765	82.238	94.985	76.189	86.527	90.736	79.135	75.745	94.189	87.64	81.108	63.025	91.021	93.631	90.384	82.913	108.678	89.418	88.421	91.117	97.992	93.974	96.379	77.819	87.87	90.444	102.559	82.712	89.714	86.84
	92.824	110.517	65.152	86.263	88.833	74.333	70.677	88.784	73.149	86.323	68.208	92.05	92.672	93.68	79.77	91.093	85.443	78.54	81.706	72.765	82.238	94.985	76.189	86.527	90.736	90.712	75.745	94.189	87.64	81.108	71.044	91.021	93.631	90.384	82.913	108.678	89.418	88.421	91.117	93.332	87.936	96.379	77.819	87.87	90.444	102.559	82.712	89.714	108.173
	92.824	110.517	56.685	86.263	88.833	74.333	70.677	88.784	73.149	86.323	68.208	92.05	92.672	93.68	79.77	91.093	85.443	78.54	81.706	96.239	92.242	94.985	76.189	86.527	90.736	90.712	75.745	94.189	87.64	81.108	71.044	91.021	93.155	90.384	82.913	108.678	89.418	88.421	91.117	93.332	87.936	96.379	77.819	87.87	90.444	102.559	82.712	89.714	108.173
	92.824	110.517	56.685	100.884	88.833	74.333	70.677	88.784	73.149	86.323	68.208	98.272	92.672	93.68	79.77	91.093	85.443	79.597	81.706	96.239	92.242	94.985	76.189	86.527	90.736	90.712	75.745	94.189	87.64	81.108	71.044	91.021	93.155	90.384	82.913	108.678	89.418	88.421	91.117	93.332	87.936	96.379	77.819	87.87	90.444	93.168	82.712	89.714	108.173
	92.824	110.517	56.685	100.884	88.833	74.333	82.802	88.784	73.149	86.323	68.208	98.272	82.783	93.68	79.77	91.093	85.443	79.597	81.706	96.239	91.118	94.985	71.808	86.527	90.736	90.712	75.745	94.189	87.64	81.108	71.044	91.021	93.155	97.823	82.913	108.678	89.418	89.357	91.117	93.332	87.936	96.379	77.819	87.87	90.444	93.168	82.712	89.714	108.173
	92.824	86.823	68.571	100.884	92.042	74.333	82.802	88.784	73.149	86.323	68.208	98.272	82.783	93.68	79.77	91.093	85.443	79.597	81.706	96.239	91.118	94.985	71.808	90.469	90.736	78.8	75.745	94.189	87.64	90.863	71.044	92.544	93.155	97.823	82.913	108.678	89.418	89.357	91.117	93.332	87.936	96.379	77.819	87.87	90.444	101.084	82.712	89.714	100.855
	92.824	86.823	68.571	100.884	92.042	74.333	82.802	88.784	115.382	86.323	68.208	98.272	82.783	93.68	79.77	91.093	85.443	79.597	81.706	96.239	91.118	94.985	71.808	90.469	90.736	78.8	75.745	94.189	87.64	76.167	71.044	90.724	93.155	97.823	82.913	108.678	89.418	89.357	91.117	93.332	84.878	96.379	77.819	87.87	90.444	101.084	82.712	89.714	100.855
	92.824	86.823	68.571	89.77	92.042	74.333	82.802	88.784	115.382	86.323	68.208	98.272	82.783	93.68	79.77	91.093	85.443	79.597	81.706	96.239	91.118	94.985	66.511	90.469	90.736	78.8	75.745	94.189	87.64	76.167	71.044	90.724	93.155	97.823	82.913	108.678	89.418	89.357	91.117	93.332	84.878	96.379	77.819	87.87	90.444	101.084	82.712	89.714	100.855
	92.824	86.823	53.675	89.77	92.042	74.333	82.802	88.784	115.382	86.323	68.208	84.353	82.783	93.68	79.77	91.093	85.443	79.597	81.706	96.239	91.118	94.985	82.446	90.469	90.736	78.8	75.745	94.189	87.64	76.167	71.044	90.724	93.155	97.823	82.913	95.403	89.418	89.357	91.117	94.81	97.087	96.379	77.819	87.87	90.444	101.084	82.712	89.714	91.754
	92.824	86.823	53.675	89.77	92.042	74.333	82.802	88.784	115.382	86.323	68.208	84.353	82.783	93.68	79.77	91.093	85.443	79.597	81.706	96.239	91.118	94.985	82.446	90.469	90.736	78.8	75.745	94.189	87.64	76.167	71.044	90.724	93.155	97.823	82.913	95.403	89.418	89.357	91.117	94.81	97.087	96.379	77.819	87.87	90.444	101.084	82.712	89.714	91.754
	92.824	105.589	53.675	89.77	92.042	74.333	82.802	88.784	115.382	86.323	68.208	84.353	89.959	93.68	79.77	91.093	85.443	79.597	81.706	96.239	91.118	94.985	82.446	90.469	90.736	78.8	75.745	94.189	87.64	76.167	71.044	90.724	93.155	97.823	82.913	95.403	89.418	100.657	91.117	94.81	97.087	84.422	77.819	87.87	90.444	101.084	82.712	89.714	91.754
	92.824	105.589	53.675	89.77	92.042	74.333	82.802	88.784	115.382	86.323	68.208	84.904	89.959	93.68	79.77	91.093	85.443	79.597	81.706	96.239	91.118	94.985	82.446	102.379	90.736	78.8	75.745	94.189	87.64	76.167	72.676	90.724	93.155	97.823	82.913	95.403	89.418	100.657	91.117	94.81	97.087	84.422	77.819	87.87	88.437	101.084	82.712	89.714	91.754
	92.824	105.589	53.675	89.77	92.042	74.333	82.802	88.784	68.139	86.323	68.208	84.904	89.959	93.68	79.77	91.093	85.443	79.597	81.706	96.239	91.118	94.985	82.446	102.379	90.736	78.8	75.745	94.189	87.64	76.167	72.676	90.724	93.155	97.823	82.913	85.68	89.418	87.813	91.117	94.81	97.087	84.422	77.819	87.87	88.437	90.323	82.712	89.714	91.754
	92.824	105.589	53.675	89.77	86.116	79.908	82.802	89.136	68.139	86.323	68.208	84.904	89.959	93.68	79.77	91.093	85.443	79.597	81.706	96.239	91.118	90.706	82.446	102.379	90.736	78.8	75.745	94.189	87.64	76.167	72.676	82.482	90.833	97.823	82.913	85.68	89.418	87.813	91.117	81.592	97.087	84.422	77.819	87.87	88.437	90.323	82.712	89.714	91.754
	92.824	105.589	53.675	89.77	83.706	79.908	82.802	89.136	95.795	84.631	71.179	84.904	89.959	93.68	79.77	91.093	85.443	79.597	81.706	96.239	91.118	90.706	82.446	102.379	90.736	78.8	75.745	94.189	87.64	76.167	72.676	82.482	87.337	97.823	82.913	85.68	89.418	87.813	91.117	81.592	97.087	84.422	77.819	87.87	88.437	90.323	82.712	89.714	91.754
	92.824	96.765	53.675	101.586	83.706	79.908	82.802	89.136	95.795	84.631	71.179	84.904	89.959	93.68	85.453	91.093	85.443	79.597	81.706	96.239	91.118	90.706	82.446	88.026	90.736	78.8	75.745	94.189	87.64	76.167	72.676	82.482	87.337	97.823	82.913	85.68	93.368	92.231	91.117	81.592	97.087	89.103	77.819	87.87	88.437	90.323	82.712	89.714	91.754
	92.824	96.765	53.675	101.586	83.706	79.908	82.802	89.136	91.182	84.631	71.179	91.252	89.959	93.68	85.453	91.093	85.443	86.391	81.706	96.239	91.118	90.706	82.446	88.026	90.736	78.8	75.745	94.189	87.64	76.167	72.676	82.482	85.796	100.092	82.913	85.68	93.368	92.231	91.117	81.592	97.087	89.103	77.819	87.87	88.437	90.323	82.712	89.714	91.754
	92.824	96.765	53.675	101.586	87.017	79.908	85.892	89.136	91.182	84.631	71.179	91.252	89.959	93.68	85.167	91.093	90	86.391	81.706	96.239	91.118	90.706	82.446	88.026	90.736	78.8	75.745	94.189	87.64	76.167	71.88	82.482	85.796	100.092	82.913	97.409	93.368	92.231	91.117	81.592	97.087	89.103	77.819	98.399	88.437	90.323	82.712	89.714	91.754
	92.824	96.765	53.675	101.586	87.017	79.908	85.892	89.136	91.182	84.631	71.179	91.252	95.655	93.68	85.167	91.093	90	86.391	81.706	96.239	91.118	89.212	82.446	88.026	90.736	78.8	75.745	94.189	87.64	76.167	71.88	89.004	85.796	100.092	82.913	97.409	93.368	83.052	91.117	81.592	85.397	89.103	77.819	98.399	88.437	90.323	82.712	89.714	91.754
	92.824	96.765	62.006	101.586	87.536	79.908	85.892	91.852	91.182	84.631	71.179	91.252	95.655	93.68	82.124	91.093	90	86.391	81.706	96.239	91.118	89.212	82.446	88.026	90.736	78.8	75.745	94.189	87.64	76.167	71.88	89.004	85.796	100.092	82.913	91.852	93.368	83.052	91.117	81.592	85.397	89.103	77.819	98.399	88.437	111.863	82.712	89.714	91.754
	92.824	96.765	62.006	94.897	87.536	79.908	86.807	91.852	91.182	84.631	71.179	91.252	86.343	93.68	82.124	91.093	90	86.391	81.706	96.239	91.118	89.212	82.446	88.026	90.736	78.8	75.745	89.102	87.64	76.167	71.88	89.004	103.026	100.092	82.913	91.852	93.368	83.052	91.117	81.592	85.397	89.103	77.819	98.399	88.437	111.863	82.712	89.714	91.754
	92.824	96.765	62.006	94.897	87.536	88.829	86.807	91.852	91.182	84.631	71.179	91.252	86.343	93.68	82.124	91.093	90	86.391	81.706	96.239	80.913	89.212	82.446	88.026	90.736	78.8	75.745	89.102	87.64	76.167	71.88	89.004	103.026	100.092	82.913	91.852	93.368	83.052	91.117	87.36	85.397	89.103	77.819	98.399	88.437	111.863	82.712	89.714	91.754
	92.824	96.765	62.006	94.897	87.536	88.829	86.807	91.852	91.182	84.631	71.179	91.252	86.343	93.68	82.124	91.093	90.001	86.391	81.706	96.239	80.913	89.212	82.446	88.026	90.736	78.8	75.745	89.102	87.64	76.167	71.88	89.004	103.026	100.092	82.913	91.852	93.368	92.63	91.117	87.36	85.397	89.103	77.819	98.399	88.437	111.863	82.712	89.714	91.754
	92.824	96.765	63.124	94.897	87.536	88.829	86.807	91.852	91.182	84.631	77.918	82.946	91.068	93.68	82.124	91.093	90.001	86.391	81.706	96.239	80.913	89.212	82.446	88.026	90.736	78.8	75.745	78.009	87.64	76.167	71.88	89.004	99.397	100.092	82.913	91.852	84.45	92.63	91.117	87.36	85.397	89.103	77.819	93.375	88.437	111.863	82.712	89.714	91.754
	92.824	96.765	63.124	94.897	87.536	88.829	86.807	91.852	91.182	84.631	77.918	82.946	91.068	93.68	82.124	91.093	87.645	86.391	81.706	96.239	80.913	89.212	82.446	88.026	90.736	78.8	75.745	78.009	87.64	76.167	71.88	89.004	99.397	100.092	82.913	91.852	84.45	92.63	91.117	87.36	85.397	89.103	77.819	93.375	88.437	111.863	82.712	89.714	91.754
	92.824	96.765	63.124	94.897	87.536	88.829	86.807	91.852	91.182	84.631	74.229	92.102	91.068	93.68	82.124	91.093	87.645	86.391	81.706	96.239	94.304	89.212	82.446	88.026	90.736	94.264	75.745	78.009	87.64	76.167	71.88	89.004	99.397	94.133	82.913	91.852	84.45	92.63	91.117	87.36	85.397	92.542	77.819	93.375	88.437	111.863	82.712	89.714	76.867
	92.824	98.678	63.124	94.897	87.536	88.829	86.807	91.852	91.182	84.631	74.229	92.102	91.068	93.68	82.124	91.093	87.645	86.391	81.706	96.239	94.304	89.212	82.446	88.026	90.736	94.264	75.745	92.038	87.64	76.167	71.88	89.004	99.397	94.133	82.913	91.852	84.45	92.63	91.117	94.402	85.397	92.542	78.857	93.375	88.437	111.863	82.712	89.714	76.867
	92.824	98.678	63.124	94.897	87.536	88.829	86.807	91.852	91.182	84.631	74.229	93.13	91.068	93.68	82.124	91.093	87.645	86.391	81.706	96.239	94.304	89.212	82.446	88.026	90.736	94.264	75.745	92.038	87.64	76.167	71.88	89.004	99.397	94.133	82.913	91.852	84.45	92.63	91.117	94.402	85.397	92.542	78.857	93.375	88.437	111.863	82.712	89.714	76.867
	92.824	98.678	55.619	94.897	87.536	88.829	85.63	91.852	91.182	84.631	74.229	93.13	91.068	93.68	82.124	91.093	87.645	86.391	81.706	85.417	94.304	89.212	82.446	88.026	90.736	94.264	75.745	92.038	87.64	84.209	71.88	89.004	79.148	94.133	82.913	91.852	84.45	92.63	91.117	94.402	85.397	93.378	78.857	93.375	88.437	111.863	82.712	89.714	92.804
	92.824	98.678	55.619	92.091	88.213	88.829	85.63	95.036	91.182	84.631	74.229	93.13	91.068	93.68	77.806	91.093	87.645	86.391	81.706	85.417	90	89.212	82.446	88.026	90.736	94.264	75.745	101.836	87.64	84.209	71.88	89.004	79.148	94.133	82.913	91.852	84.45	98.46	91.117	94.606	85.397	93.378	78.857	87.252	88.437	111.863	82.712	89.714	92.804
	92.824	98.678	55.619	92.091	88.213	88.829	85.63	95.036	91.182	84.631	74.229	93.13	91.068	93.68	77.806	91.093	87.645	83.094	81.706	84.182	90	92.146	82.446	88.026	90.736	94.264	75.745	101.836	87.64	84.209	71.88	89.004	79.148	94.133	82.913	91.852	95.938	98.46	91.117	94.606	85.397	93.378	78.857	87.252	88.437	111.863	82.712	89.714	92.804
	92.824	98.678	47.024	97.115	88.213	88.829	85.63	95.036	91.182	84.631	74.229	93.13	91.068	93.68	77.806	91.093	87.645	83.094	81.706	84.182	90	92.146	82.446	88.026	90.736	94.264	75.745	101.836	87.64	84.209	71.88	89.004	79.148	94.133	82.913	91.852	95.938	98.46	91.117	94.606	85.397	92.395	78.857	87.252	88.437	111.863	82.712	89.714	92.804
	92.824	98.678	47.024	97.115	86.29	88.829	81.406	95.036	91.182	84.631	74.229	93.13	91.068	93.68	77.806	91.093	87.645	83.094	81.706	84.182	90	92.146	82.446	88.026	90.736	94.264	75.745	75.298	87.64	84.209	71.88	89.004	79.148	96.243	82.913	91.852	95.976	98.46	91.117	94.606	85.397	92.395	78.857	87.252	88.437	111.863	82.712	89.714	92.804
	92.824	98.678	47.024	97.115	86.29	88.829	81.406	95.036	91.182	84.631	74.229	93.13	91.068	93.68	77.806	91.093	87.645	83.094	81.706	84.182	90	92.146	82.446	88.026	90.736	94.264	75.745	75.298	87.64	84.209	71.88	89.004	79.148	96.243	82.913	91.852	95.976	98.46	91.117	94.606	85.397	92.395	78.857	87.252	88.437	111.863	82.712	89.714	94.183
	92.824	98.678	75.531	97.115	86.29	88.829	81.406	95.036	91.182	84.631	67.603	93.13	91.068	93.68	80.252	91.093	87.645	83.094	81.706	76.031	95.943	90.863	82.446	88.026	90.736	94.264	75.745	75.298	87.64	84.209	71.88	89.004	79.148	93.334	82.913	91.852	95.976	98.46	91.117	88.062	85.397	92.395	78.857	87.252	88.437	111.863	82.712	89.714	94.183
	92.824	98.678	75.531	97.115	86.29	88.829	81.406	95.036	91.182	86.527	67.603	93.13	91.068	93.68	80.252	91.093	87.645	83.094	81.706	76.031	95.943	90.863	82.446	88.026	90.736	94.264	75.745	75.298	87.64	84.209	71.88	89.004	79.148	93.334	82.913	91.852	95.976	98.46	91.117	88.062	85.397	92.395	78.857	87.252	88.437	111.863	82.712	89.714	94.183
	92.824	98.678	73.012	97.115	94.371	88.829	81.406	95.036	91.182	86.527	67.603	93.13	91.068	93.68	80.252	91.093	87.645	83.094	81.706	96.118	95.943	90.863	78.233	88.026	90.736	94.264	75.745	95.608	87.64	84.209	63.484	89.004	90	93.334	82.913	91.852	95.976	98.46	91.117	88.062	85.397	92.395	78.857	87.252	88.437	111.863	82.712	89.714	99.602
	92.824	98.678	73.012	69.973	94.371	88.829	81.406	95.036	91.182	94.88	67.603	93.13	91.068	93.68	80.252	91.093	87.645	83.094	81.706	96.118	95.943	90.863	78.233	88.026	90.736	94.264	75.745	95.608	87.64	83.42	63.484	89.004	90	93.334	82.913	91.852	95.976	98.46	91.117	88.062	85.397	73.623	78.857	90.188	88.437	111.863	82.712	89.714	99.602
	92.824	98.678	73.012	69.973	94.371	88.829	81.406	95.036	91.182	94.88	67.603	93.13	91.068	93.68	80.252	91.093	87.645	83.094	81.706	96.118	95.943	90.863	78.233	88.026	90.736	94.264	75.745	95.608	87.64	83.42	63.484	89.004	90	93.334	82.913	91.852	95.976	98.46	91.117	88.062	85.397	73.623	78.857	90.188	88.437	91.393	82.712	89.714	99.602
	92.824	98.678	61.758	89.63	94.371	88.829	81.406	95.036	91.182	94.88	75.604	93.13	91.068	93.68	80.252	91.093	87.645	83.094	81.706	96.118	95.943	90.863	78.233	88.026	90.736	94.264	49.403	88.032	87.64	83.42	63.484	97.249	90	93.334	82.913	91.852	95.976	98.46	91.117	88.062	85.397	85.949	78.857	80.039	88.437	91.393	82.712	89.714	92.406
	92.824	98.678	61.758	89.63	94.371	88.829	81.406	95.036	91.182	94.88	75.604	93.13	91.068	93.68	70.984	91.093	87.645	83.094	81.706	96.118	95.943	90.863	78.233	88.026	90.736	94.264	49.403	88.032	87.64	83.42	63.484	97.249	90	93.334	82.913	91.852	93.884	98.46	91.117	88.062	85.397	85.949	78.857	80.039	88.437	91.393	82.712	92.661	92.406
	92.824	98.678	60.117	89.63	94.371	88.829	81.406	95.036	91.182	94.88	75.604	93.13	91.068	93.68	70.984	91.093	87.645	83.094	81.706	91.518	95.943	90.863	78.233	88.026	90.736	94.264	49.403	88.032	87.64	83.42	63.484	90.647	90	93.334	82.913	91.852	93.884	98.46	91.117	88.062	85.397	85.949	78.857	80.039	88.437	91.393	82.712	92.661	92.406
	92.824	98.678	60.117	89.63	86.241	88.829	81.406	95.036	91.182	94.88	75.604	93.13	91.068	93.68	81.523	91.093	87.645	83.094	81.706	91.518	95.943	90.863	78.233	88.026	90.736	94.264	71.393	88.032	87.64	83.42	63.484	90.647	90	93.334	82.913	91.852	93.884	98.46	91.117	88.062	85.397	85.949	78.857	80.039	88.437	91.393	82.712	92.661	92.406
	92.824	98.678	60.117	89.63	86.241	88.829	81.406	88.933	91.182	94.88	75.604	93.13	91.068	93.68	81.523	91.093	87.645	83.094	81.706	91.518	95.943	90.863	78.233	88.026	90.736	94.264	71.393	73.959	87.64	83.42	63.484	90.647	90	93.334	82.913	91.852	93.884	98.46	91.117	88.062	85.397	85.949	78.857	80.039	88.437	74.303	82.712	92.661	92.406
	92.824	98.678	60.117	89.63	86.241	88.829	81.406	88.933	91.182	94.88	75.604	93.13	91.068	93.68	83.111	91.093	87.645	83.094	81.706	91.518	92.041	90.863	78.233	88.026	90.736	84.994	71.393	73.959	87.64	83.42	63.484	90.647	90	93.334	82.913	91.852	90.01	92.701	91.117	88.062	85.397	85.949	78.857	102.487	88.437	74.303	82.712	92.661	92.406
	92.824	98.678	60.117	89.63	86.241	88.829	81.406	88.933	91.182	94.88	75.604	85.154	91.068	93.68	83.111	90.272	87.645	83.094	81.706	91.518	92.041	86.127	78.233	88.026	90.736	84.994	71.393	110.184	87.64	83.42	63.484	90.647	90	93.334	82.913	91.852	90.01	92.701	91.117	79.899	85.397	85.949	78.857	102.487	88.437	74.303	82.712	92.661	92.406
	92.824	98.678	65.057	89.63	86.241	88.829	86.517	88.933	91.182	94.88	75.604	85.154	91.068	93.68	83.111	90.272	87.645	83.094	81.706	91.518	92.041	86.127	75.705	88.026	90.736	84.994	71.393	110.184	87.64	83.42	42.578	90.647	90	93.334	82.913	91.852	90.01	92.701	91.117	79.899	85.397	85.949	78.857	102.487	88.437	74.303	82.712	92.661	92.406
	92.824	98.678	65.057	89.63	86.241	88.829	86.517	88.933	91.182	94.88	75.604	85.154	91.068	93.68	83.111	90.272	87.645	83.094	81.706	91.518	92.041	95.914	75.705	88.026	90.736	84.994	71.393	87.509	87.64	83.42	42.578	90.647	90	93.334	82.913	91.852	90.01	92.701	91.117	89.583	85.397	85.949	78.857	102.487	88.437	74.303	82.712	92.661	92.406
	92.824	98.678	65.057	88.317	86.241	88.829	86.517	88.933	91.182	94.88	75.604	85.154	91.068	93.68	83.111	90.272	87.645	83.094	81.706	91.518	92.041	95.914	75.705	88.026	90.736	84.994	71.393	87.509	87.64	83.42	42.578	90.647	90	93.334	82.913	91.852	90.01	92.701	91.117	89.583	85.397	85.949	78.857	97	88.437	80.312	82.712	92.661	92.406
	92.824	98.678	75.48	88.317	86.241	88.829	86.393	88.933	100.906	94.88	75.604	85.154	91.068	93.68	82.907	90.272	87.645	83.094	81.706	91.518	92.041	93.967	75.705	88.026	90.736	84.994	58.223	87.509	87.64	83.42	42.578	90.647	90	93.334	82.913	91.852	90.01	92.701	91.117	89.583	85.397	85.949	78.857	97	88.437	80.312	82.712	92.661	92.406
	92.824	98.678	75.48	88.317	86.241	88.829	86.393	88.933	100.906	94.88	75.604	85.154	91.068	93.68	82.907	90.272	87.645	83.094	81.706	91.518	92.041	93.967	79.594	90.283	90.736	84.994	58.223	87.509	87.64	83.42	42.578	90.647	90	93.334	82.913	91.852	90.01	92.701	91.117	89.583	85.397	85.949	78.857	97	88.437	80.312	82.712	92.661	92.406
	92.824	98.678	75.48	93.129	86.241	88.829	86.393	88.933	100.906	94.88	80.798	85.154	91.068	93.68	82.907	90.272	87.645	83.094	81.706	91.518	92.041	93.967	79.594	90.283	90.736	84.994	58.223	87.509	87.64	83.42	42.578	87.509	90	93.334	82.913	91.852	90.01	92.701	91.117	89.583	85.397	85.949	78.857	97	88.437	80.312	82.712	92.661	92.406
	92.824	98.678	75.48	93.129	103.432	88.829	86.393	88.933	92.756	94.88	80.798	85.154	91.068	93.68	82.907	90.272	87.645	83.094	81.706	91.518	85.772	93.967	79.594	90.283	90.736	84.994	58.223	91.245	87.64	83.42	42.578	87.509	90	93.334	82.913	91.852	90.01	92.701	91.117	89.583	85.397	91.148	78.857	89.803	88.437	80.312	82.712	92.661	92.406
	92.824	98.678	75.48	93.129	103.432	88.829	86.393	92.914	92.756	94.88	64.566	85.154	91.068	93.68	83.621	90.272	87.645	83.094	81.706	91.518	85.772	93.967	79.594	90.283	90.736	84.994	58.223	91.245	87.64	83.42	42.578	87.509	90	93.334	82.913	91.852	90.01	92.701	91.117	89.583	85.397	91.148	78.857	89.803	88.437	80.312	82.712	92.661	92.406
	92.824	98.678	75.48	87.832	103.432	79.676	86.393	92.914	92.756	94.88	64.566	85.154	91.068	93.68	83.621	90.272	87.645	83.094	81.706	91.518	84.823	93.967	79.594	90.283	90.736	84.994	58.726	91.245	87.64	83.42	42.578	87.509	90	93.334	82.913	91.852	85.121	92.701	91.117	89.583	85.397	91.148	78.857	89.803	88.437	80.312	82.712	92.661	92.406
	92.824	98.678	75.48	87.832	85.729	79.676	86.393	88.649	92.756	94.88	64.566	85.154	91.068	93.68	83.621	90.272	87.645	83.094	81.706	91.518	84.823	93.967	67.853	90.283	90.736	84.994	58.726	91.245	87.64	83.42	42.578	87.509	90	93.334	82.913	91.852	85.121	92.701	91.117	89.583	95.049	91.148	78.857	89.803	88.437	80.312	82.712	92.661	92.406
	92.824	98.678	69.857	91.516	85.729	79.676	86.393	88.649	92.756	94.88	64.566	85.154	91.068	93.68	83.621	90.272	87.645	83.094	81.706	91.518	84.823	93.967	67.853	90.283	90.736	91.151	58.726	91.245	87.64	83.42	42.578	87.509	90	93.334	82.913	91.852	85.121	92.701	91.117	89.583	95.049	91.148	78.857	89.803	88.437	80.312	82.712	92.661	92.406
	92.824	98.678	69.857	91.516	85.729	79.676	86.393	88.649	92.756	94.88	74.421	85.154	91.068	93.68	83.621	90.272	87.645	83.094	81.706	91.518	84.823	93.967	67.853	90.283	90.736	91.151	58.726	91.245	87.64	83.42	42.578	87.509	90	93.334	82.913	91.852	85.121	92.701	91.117	91.737	95.049	91.148	78.857	89.803	88.437	80.312	82.712	92.661	92.406
	92.824	98.678	69.857	91.516	85.729	79.676	86.393	88.649	92.756	94.88	74.421	85.154	91.068	93.68	83.621	90.272	87.645	83.094	81.706	91.518	84.823	93.967	67.853	90.283	90.736	91.151	44.234	91.245	87.64	83.42	42.578	87.509	90	93.334	82.913	91.852	85.121	92.701	91.117	91.737	95.049	91.148	78.857	89.803	88.437	80.312	82.712	92.661	92.406
	92.824	98.678	69.857	85.208	91.554	79.676	86.325	88.649	92.756	94.88	61.915	85.154	91.068	93.68	83.621	90.272	87.645	83.094	81.706	91.518	84.823	93.967	67.853	90.283	90.736	91.151	44.234	91.245	87.64	83.42	70.171	87.509	90	93.334	82.913	91.852	85.121	92.701	91.117	91.737	95.049	91.148	78.857	89.803	88.437	80.312	82.712	92.661	92.406
	92.824	98.678	69.857	85.208	91.554	89.927	86.325	92.607	92.756	94.88	61.915	85.154	91.068	93.68	83.621	90.272	93.162	83.094	81.706	91.518	84.823	93.967	67.853	90.283	90.736	91.151	65.772	91.245	87.64	83.42	70.171	87.509	90	93.334	82.913	91.852	85.121	92.701	91.117	91.737	95.049	91.148	78.857	89.803	88.437	80.312	82.712	92.661	92.406
	92.824	98.678	83.856	85.208	91.554	89.927	86.325	92.607	92.756	94.88	61.915	85.154	91.068	93.68	83.621	88.801	93.162	83.094	81.706	91.518	84.823	93.967	67.853	90.283	90.736	91.151	65.772	91.245	87.64	83.42	70.171	87.509	90	93.334	82.913	91.852	85.121	92.701	91.117	91.737	95.049	91.148	78.857	89.803	88.437	80.312	82.712	92.661	87.338
	92.824	98.678	83.856	85.208	91.554	89.927	86.325	92.607	92.756	94.88	61.915	85.154	91.068	93.68	83.621	88.801	93.162	83.094	81.706	91.518	84.823	93.967	67.853	90.283	90.736	91.151	65.772	90.484	87.64	83.42	70.171	87.509	90	93.334	82.913	91.852	85.121	92.701	91.117	91.737	95.049	91.148	78.857	95.877	88.437	80.312	82.712	92.661	87.338
	92.824	98.678	75.546	103.548	91.554	89.927	86.325	87.905	84.786	94.88	82.281	85.154	93.238	93.68	83.621	88.801	93.162	83.094	81.706	91.518	84.823	93.967	67.853	90.283	90.736	91.151	65.772	90.484	87.64	83.42	70.171	87.509	90	93.334	82.913	91.852	85.121	92.701	91.117	91.737	95.049	91.148	78.857	95.877	88.437	80.312	82.712	92.661	87.338
	92.824	98.678	75.546	103.548	91.554	84.885	83.664	87.905	84.786	94.88	82.281	85.154	93.238	93.68	83.621	88.801	93.162	83.094	81.706	91.518	84.823	93.967	67.853	90.283	90.736	91.151	65.772	90.484	87.64	83.42	70.171	87.509	90	104.625	82.913	84.221	85.121	92.701	91.117	91.737	95.049	91.148	78.857	95.877	88.437	80.312	82.712	92.661	87.338
	92.824	98.678	81.475	103.548	91.554	84.885	83.664	87.905	84.786	94.88	82.281	85.154	93.238	93.68	83.621	88.801	93.162	83.094	81.706	91.518	84.823	93.967	67.853	90.283	90.736	91.151	65.772	90.484	87.64	83.42	70.171	87.509	90	104.625	82.913	84.221	85.121	92.701	91.117	91.737	89.074	91.148	76.425	95.877	88.437	80.312	82.712	92.661	87.338
	92.824	98.678	81.475	100.689	78.045	84.885	83.664	87.905	84.786	94.88	82.281	85.154	93.238	93.68	83.621	88.801	93.162	83.094	81.706	91.518	84.823	93.967	67.853	90.283	90.736	91.151	65.772	89.032	87.64	83.42	70.171	87.509	90	104.625	82.913	84.221	85.121	92.701	91.117	91.737	89.074	91.148	76.425	95.877	88.437	80.312	82.712	92.661	87.338
	92.824	98.678	85.448	100.689	78.045	78.917	85.102	87.905	94.817	94.88	82.281	85.154	93.238	93.68	83.621	99.225	93.162	83.094	81.706	91.518	82.776	93.967	67.853	90.283	90.736	91.151	65.772	89.032	87.64	83.42	70.171	87.509	90	102.99	82.913	84.221	94.137	92.701	91.117	91.737	89.074	91.148	76.425	85.742	88.437	80.312	82.712	92.661	86.482
	92.824	98.678	85.448	100.689	78.045	78.917	85.102	87.905	94.817	94.88	78.007	85.154	93.238	93.68	83.621	99.225	93.162	83.282	81.706	91.518	82.776	93.967	67.853	90.283	90.736	91.151	65.772	72.951	87.64	83.42	70.171	87.509	90	102.99	82.913	84.221	94.137	92.701	91.117	91.737	89.074	91.148	76.425	85.742	88.437	80.312	82.712	92.661	86.482
	92.824	98.678	85.448	100.689	78.045	78.917	85.102	87.905	94.817	94.88	78.007	99.283	93.238	93.68	83.621	101.018	93.162	83.282	81.706	91.518	82.776	93.967	67.853	90.283	79.014	91.151	65.772	72.951	87.64	83.42	70.171	87.509	90	102.99	82.913	84.221	94.137	92.701	91.117	91.737	89.074	94.359	76.425	85.742	88.437	80.312	82.712	92.661	86.482
	92.824	98.678	76.132	100.689	78.045	78.917	85.102	87.905	88.591	94.88	76.41	99.283	93.238	93.68	83.621	101.018	93.162	91.141	81.706	91.518	82.776	93.967	67.853	90.283	79.014	91.151	65.772	72.951	87.64	83.42	70.171	87.509	90.366	102.99	82.913	84.221	94.137	92.701	91.117	85.904	89.69	94.359	76.425	85.742	88.437	80.312	82.712	92.661	86.482
	92.824	98.678	76.132	103.203	78.045	78.917	85.102	87.905	88.591	94.88	76.41	99.283	93.238	93.68	83.621	91.868	93.162	91.141	81.706	91.518	82.776	93.967	67.853	90.283	79.014	91.151	65.772	72.951	87.64	83.42	70.171	87.509	90.366	102.99	82.913	84.221	94.137	92.701	91.117	85.904	89.69	94.359	76.425	85.742	88.437	80.312	82.712	92.661	86.482
	92.824	98.678	76.132	103.203	78.045	78.917	85.102	87.905	88.591	94.88	75.233	99.283	93.238	93.68	83.621	91.868	93.162	91.141	81.706	91.518	82.776	93.967	67.853	90.283	70.138	91.151	65.772	93.049	87.64	83.42	70.171	87.509	90.366	102.99	82.913	84.221	94.137	92.701	91.117	85.904	89.823	94.359	76.425	85.742	88.437	80.312	82.712	92.661	86.482
	92.824	98.678	76.132	103.203	101.681	78.917	85.102	87.905	88.591	94.88	75.233	99.283	93.238	93.68	83.621	91.868	93.162	91.141	81.706	91.518	82.776	93.967	67.853	90.283	70.138	92.685	65.772	93.049	87.64	83.42	70.171	87.509	90.366	102.99	82.913	84.221	99.851	92.701	91.117	85.904	89.823	94.359	76.425	85.742	88.437	80.312	82.712	92.661	93.86
	92.824	98.678	76.132	103.203	101.681	78.917	85.102	87.905	88.591	94.88	71.689	99.283	93.238	84.187	83.621	91.868	93.162	91.141	81.706	91.518	82.776	105.324	67.853	89.076	102.397	92.685	65.772	93.049	87.64	83.42	70.171	87.509	86.417	102.99	82.913	84.221	99.851	92.701	91.117	85.904	89.823	81.855	76.425	85.742	88.437	80.312	82.712	92.661	93.86
	92.824	98.678	76.132	83.428	94.012	78.917	85.102	87.905	88.591	94.88	71.689	99.283	93.238	84.187	83.621	91.868	93.162	91.141	81.706	91.518	82.776	105.324	67.853	89.076	102.397	94.888	65.772	93.049	87.64	83.42	70.171	87.509	86.417	102.99	82.913	84.221	99.851	92.701	91.117	85.904	89.823	81.855	76.425	85.742	88.437	80.312	82.712	92.661	93.86
	92.824	98.678	76.132	83.428	94.012	78.917	85.102	87.905	88.591	94.88	71.689	99.283	93.238	84.187	83.621	91.868	93.162	91.141	81.706	91.518	82.776	105.324	67.853	89.076	102.397	94.888	65.772	93.049	87.64	83.42	70.171	87.509	91.139	102.99	82.913	84.221	82.232	92.701	91.117	85.904	89.823	81.855	76.425	85.742	88.437	80.312	82.712	92.661	93.86
	92.824	98.678	76.132	83.428	94.012	78.917	85.102	87.905	88.591	94.88	71.689	99.283	93.238	96.39	83.621	91.868	93.162	91.141	81.706	91.518	82.776	105.324	67.853	89.076	93.481	94.888	65.772	93.049	87.64	83.42	70.171	87.509	91.139	102.99	82.913	84.221	82.232	92.701	91.117	85.904	89.823	81.855	76.425	85.742	88.437	80.683	82.712	92.661	93.86
	92.824	98.678	76.132	83.428	94.012	78.917	85.102	87.905	88.591	94.88	71.689	99.283	93.238	96.39	83.621	91.868	93.162	91.141	81.706	91.518	82.776	105.324	67.853	80.51	93.481	94.888	65.772	93.049	87.64	83.42	67.293	87.509	91.139	102.99	82.913	84.221	82.232	92.701	91.117	85.904	90.273	81.855	76.425	85.742	88.437	80.683	82.712	92.661	93.86
	92.824	98.678	76.132	83.428	94.012	78.917	85.102	87.905	88.591	94.88	71.689	75.069	93.238	76.359	83.621	91.868	93.162	91.141	81.706	91.518	82.776	105.324	67.853	80.51	93.481	94.888	65.772	93.049	87.64	83.42	67.293	87.509	91.139	102.99	82.913	84.221	82.232	92.701	91.117	85.904	90.273	81.855	76.425	85.742	88.437	84.256	82.712	92.661	93.86
	92.824	99.82	76.132	83.428	94.012	78.917	85.102	87.905	88.591	94.88	71.689	75.069	93.238	76.359	83.621	91.868	93.162	91.141	81.706	91.518	82.776	90.295	67.853	94.595	93.481	93.085	64.312	93.049	87.64	83.42	67.293	87.509	91.139	102.99	82.913	84.221	82.232	92.701	91.117	85.904	90.168	81.855	76.425	89.987	88.437	84.256	82.712	92.661	93.86
	92.824	99.82	76.132	83.428	94.012	78.917	85.102	87.905	86.888	94.88	71.689	75.069	93.238	76.359	68.126	91.868	93.162	91.141	81.706	91.518	82.776	90.295	67.853	94.595	93.481	93.085	64.312	93.049	87.64	83.42	67.293	87.509	78.397	102.99	82.913	87.724	82.232	86.949	91.117	85.904	90.168	81.855	83.616	89.987	88.437	84.256	82.712	92.661	93.86
	92.824	99.82	76.132	83.428	109.373	78.917	85.102	87.905	86.888	94.88	71.689	91.114	93.238	76.359	68.126	91.868	93.162	91.141	81.706	91.518	82.776	90.295	50.893	94.595	93.481	93.085	64.38	93.049	87.64	83.42	67.293	87.509	78.397	102.99	82.913	87.724	82.232	86.949	91.117	85.904	90.168	81.855	83.616	90.005	90.33	84.256	82.712	92.661	93.86
	92.824	99.82	76.132	83.428	109.373	78.917	85.102	88.319	86.888	94.055	71.689	91.114	93.238	76.359	68.126	91.868	93.162	93.556	81.706	91.518	82.776	88.497	50.893	94.595	93.481	93.085	64.38	93.049	87.64	83.42	67.293	87.509	78.397	102.99	82.913	87.724	90	86.949	91.117	85.904	90.168	86.702	83.269	90.005	90.33	84.256	82.712	92.661	93.86
	92.824	99.82	72.252	83.428	90.996	78.917	85.102	88.319	86.888	100.156	71.689	91.114	93.238	76.359	67.498	91.868	93.162	93.556	81.706	91.518	93.787	88.497	50.893	102.068	93.481	93.085	64.38	93.049	87.64	83.42	67.293	87.509	78.397	111.141	82.913	90.488	90	86.949	91.117	85.904	90.168	86.702	83.269	90.005	90.33	93.344	82.712	92.661	93.86
	92.824	99.82	72.252	83.428	90.996	78.917	85.102	88.319	86.888	100.156	71.689	88.658	93.238	76.359	67.498	91.868	93.162	93.556	81.706	91.518	93.787	88.497	69.228	102.068	93.481	93.085	59.737	93.049	87.64	83.42	67.293	87.509	78.397	111.141	82.913	90.488	90	86.949	91.117	85.904	90.168	86.702	83.269	90.005	90.33	93.344	82.712	92.661	93.86
	92.824	99.82	72.252	83.428	90.996	78.917	85.102	88.319	87.373	100.156	71.689	88.658	93.238	76.359	67.498	91.868	93.162	93.556	81.706	91.518	93.787	88.497	69.228	102.068	93.481	93.085	59.737	93.049	87.64	83.42	77.27	87.509	78.397	111.141	82.913	90.488	90	86.949	91.117	85.904	90.168	86.702	83.269	90.005	90.33	93.344	82.712	92.661	93.86
	92.824	99.82	72.252	83.428	90.996	78.917	85.102	88.319	87.373	100.156	71.689	88.658	93.238	76.359	67.498	91.868	93.162	93.556	81.706	91.518	93.787	88.497	69.228	102.068	90.828	93.085	59.737	93.049	87.64	83.42	77.27	87.509	91.134	111.141	82.913	90.488	90	86.949	91.117	85.904	90.168	86.702	83.269	84.939	90.33	93.344	82.712	92.661	93.86
	92.824	99.82	72.252	83.428	86.49	78.917	85.102	88.319	87.373	95.191	71.689	88.658	93.238	93.457	79.447	91.868	93.162	93.556	81.706	91.518	93.787	88.497	69.228	102.068	90.828	93.085	59.737	93.049	87.64	83.42	77.27	87.509	91.134	102.723	82.913	90.488	90	86.949	91.117	85.904	90.168	86.702	83.269	84.939	90.33	93.344	82.712	92.661	93.86
	92.824	99.82	83.445	83.428	86.49	78.917	85.102	88.319	87.373	95.191	71.689	88.658	93.238	93.457	79.447	91.868	93.162	93.556	81.706	91.518	93.787	83.138	69.228	102.068	90.828	93.085	59.737	93.049	87.64	83.42	77.27	87.509	91.134	102.723	82.913	90.488	90	86.949	91.117	85.904	90.168	86.702	83.269	84.939	90.33	93.344	82.712	92.661	93.86
	92.824	99.82	83.445	83.428	87.29	78.917	85.102	88.319	87.373	95.191	71.689	88.658	89.295	93.457	79.447	91.868	93.162	93.556	81.706	91.518	93.787	83.138	69.228	94.815	90.828	93.085	59.737	93.049	87.64	83.42	84.752	87.509	91.134	102.723	83.998	90.488	90	86.949	91.117	85.904	90.168	86.702	83.269	84.939	90.33	93.344	82.712	92.661	70.737
	92.824	99.82	83.445	83.428	87.29	78.917	85.102	88.319	87.373	85.771	71.689	88.658	89.295	96.532	70.362	91.868	93.162	93.556	81.706	91.518	93.787	90.263	69.228	94.815	93.77	93.085	59.737	93.049	87.64	83.42	84.752	87.509	91.134	102.723	83.998	90.488	90	86.949	91.117	85.904	90.168	88.431	83.269	84.939	90.33	93.344	82.712	92.661	70.737
	92.824	87.61	83.445	83.428	91.921	78.917	85.102	88.319	87.373	85.771	71.689	91.565	89.295	87.458	70.362	91.868	93.162	93.556	81.706	91.518	93.787	90.263	76.563	94.815	93.77	93.085	59.737	93.049	87.64	83.42	84.752	87.509	91.134	102.723	83.998	90.488	90	86.949	91.117	85.904	90.168	88.431	83.269	92.487	90.33	88.998	82.712	92.661	70.737
	92.824	87.61	83.445	83.428	91.921	78.917	85.102	88.319	87.373	85.771	71.689	91.565	89.295	87.458	70.362	91.868	93.162	93.556	81.706	91.518	93.787	106.467	76.563	94.815	93.77	93.085	59.737	91.062	87.64	83.42	82.866	87.509	91.134	102.723	83.998	90.488	90	86.949	91.117	85.904	90.168	76.65	83.269	92.487	90.33	88.998	82.712	92.661	70.737
	92.824	87.61	83.445	83.428	91.921	78.917	85.102	88.319	87.373	85.771	71.689	91.565	89.295	87.458	70.362	91.868	93.162	93.556	81.706	91.518	93.787	106.467	65.931	94.815	93.77	93.085	59.737	91.062	87.64	83.42	82.866	87.509	91.134	102.723	83.998	90.488	90	86.949	91.117	85.904	90.168	76.65	83.269	92.487	90.33	88.998	82.712	92.661	70.737
	92.824	87.61	83.445	91.35	91.921	78.917	85.102	88.319	87.373	85.771	71.689	91.565	89.295	87.458	70.362	91.868	93.162	93.556	81.706	91.518	93.787	106.467	79.933	94.815	86.321	93.085	59.737	91.062	87.64	83.42	82.866	87.509	91.134	102.723	83.998	90.488	90	86.949	91.117	85.904	90.168	76.65	83.269	92.487	90.33	88.998	82.712	92.661	70.737
	92.824	87.61	83.445	91.35	91.921	78.917	85.102	88.319	87.373	85.771	71.689	91.565	89.295	87.458	70.362	91.868	93.162	93.556	81.706	91.518	93.787	106.467	79.933	94.815	86.321	93.085	59.737	92.661	87.64	83.42	82.866	87.509	91.134	102.723	83.998	90.488	90	86.949	91.117	85.904	90.168	76.65	83.269	92.487	90.33	88.998	82.712	92.661	70.737
	92.824	87.61	83.445	91.35	91.921	78.917	85.102	88.319	87.373	85.771	71.689	91.565	89.295	87.458	70.362	91.868	93.162	93.556	81.706	91.518	93.787	106.467	79.933	94.815	86.321	93.085	59.737	92.661	87.64	83.42	76.419	87.509	91.134	110.139	83.998	90.488	90	86.949	91.117	85.904	90.168	76.65	83.269	92.487	90.33	88.998	82.712	92.661	70.737
	92.824	87.61	83.445	91.35	90.033	78.917	85.102	88.319	87.373	85.771	71.689	89.142	89.295	87.458	70.564	91.868	93.162	93.556	81.706	91.518	93.787	106.467	79.933	94.815	86.321	93.085	59.737	92.661	87.64	83.42	76.419	87.509	91.134	110.139	83.998	90.268	90	86.949	91.117	85.904	90.168	76.65	83.269	92.487	90.33	88.998	82.712	92.661	70.737
	92.824	87.61	83.445	91.35	90.033	78.917	85.102	88.319	87.373	85.771	71.689	89.142	89.295	87.458	70.564	91.868	93.162	93.556	81.706	91.518	93.787	106.467	79.933	94.815	86.321	93.085	59.737	92.661	87.64	83.42	76.419	87.509	91.134	110.139	83.998	90.268	90	86.949	91.117	85.904	90.168	76.65	72.798	92.487	90.33	88.998	82.712	92.661	70.737
	84.954	87.61	83.445	91.35	90.033	78.917	85.102	88.319	87.373	85.771	71.689	89.142	89.295	87.458	70.564	91.868	93.162	93.556	81.706	91.518	93.787	106.467	79.933	94.815	90	93.085	59.737	92.661	87.64	83.42	76.419	87.509	91.134	110.139	83.998	90.268	90	86.949	91.117	85.904	90.168	76.65	72.798	92.487	90.33	88.998	82.712	92.661	90
	84.954	87.61	83.445	91.35	90.033	78.917	85.102	88.319	87.373	85.771	71.689	89.142	89.295	87.458	70.564	91.868	93.162	93.556	81.706	91.518	93.787	106.467	79.933	89.653	90	93.085	59.737	92.661	87.64	83.42	76.419	87.509	91.134	82.919	83.998	90.268	90	86.949	91.117	85.904	90.168	76.65	72.798	92.487	90.33	88.998	82.712	92.661	90
	84.954	87.61	83.445	91.35	90.033	78.917	85.102	88.319	87.373	82.072	75.938	89.142	89.295	87.458	70.564	91.868	93.162	93.556	81.706	91.518	93.787	99.001	82.531	89.653	90	93.085	59.737	81.339	87.64	83.42	76.419	87.509	91.134	82.919	83.998	92.767	90	86.949	91.117	105.509	90.168	76.65	72.798	92.487	90.33	88.998	82.712	92.661	90
	84.954	87.61	83.445	91.35	90.033	78.917	85.102	88.319	87.373	82.072	75.938	88.943	89.295	89.24	70.564	91.868	93.162	93.556	81.706	91.518	93.787	99.001	82.531	89.653	90	93.085	59.737	81.339	87.64	83.42	76.419	87.509	91.134	82.919	83.998	92.767	90	86.949	91.117	105.509	90.168	86.839	72.798	92.487	90.33	88.998	82.712	92.661	90
	84.954	87.61	83.445	87.222	90.033	78.917	85.102	88.319	87.373	82.072	75.938	88.943	89.295	89.24	59.696	91.868	93.162	93.556	81.706	91.518	93.787	99.001	82.531	89.653	90	93.085	59.737	81.339	87.64	83.42	82.956	87.509	91.134	82.919	83.998	92.767	90	86.949	91.117	105.509	90.168	86.839	72.798	92.487	90.33	88.998	82.712	92.661	90
	84.954	87.61	83.445	87.222	90.033	78.917	85.102	90.92	87.373	82.072	75.938	88.943	89.295	89.24	59.696	91.868	93.162	93.556	81.706	91.518	93.787	89.547	82.531	89.653	90.04	93.085	59.737	81.339	87.64	83.42	82.956	87.509	91.134	89.266	83.998	89.217	90	86.949	91.117	105.509	90.168	86.839	72.798	90.329	90.33	88.998	82.712	92.661	90
	84.954	87.61	83.445	87.222	90.033	78.917	85.102	90.92	87.373	82.072	75.938	88.943	89.295	89.24	59.696	91.868	93.162	93.556	81.706	91.518	93.787	89.547	82.531	89.653	90.04	93.085	59.737	81.339	87.64	83.42	82.956	87.509	91.134	89.266	83.998	89.217	90	86.949	91.117	105.509	90.168	86.839	72.798	90.329	90.33	88.998	82.712	92.661	90
	84.954	87.61	83.445	87.222	90.033	78.917	85.102	90.92	87.373	82.072	75.938	88.943	89.295	89.24	59.696	91.868	93.162	93.556	81.706	91.518	93.787	89.547	82.531	89.653	101.671	93.085	59.737	81.339	98.064	83.42	82.956	87.509	91.134	89.266	83.998	89.217	90	86.949	91.117	83.065	90.168	96.724	72.798	88.042	90.33	88.998	82.712	92.661	90
	84.954	87.61	83.445	87.222	90.033	78.917	85.102	90.92	87.373	82.072	75.938	88.943	89.295	89.24	59.696	91.868	93.162	93.556	81.706	91.518	93.787	89.547	82.531	89.653	101.671	93.085	59.737	81.339	98.064	83.42	82.956	87.509	91.134	89.266	83.998	89.217	90	86.949	91.117	83.065	90.168	96.724	72.798	88.042	90.33	88.998	82.712	89.1	90
	84.954	87.61	83.445	87.222	90.033	78.917	85.102	92.045	87.373	82.072	75.938	92.66	89.295	89.24	59.696	91.868	93.162	93.556	81.706	91.518	93.787	89.547	91.421	89.653	101.671	93.085	59.737	81.339	98.064	83.42	82.956	87.509	91.134	80.997	83.998	89.217	90	86.949	91.117	83.065	90.168	96.724	72.798	88.042	90.33	88.998	82.712	89.1	90
	84.954	87.61	83.445	87.222	90.033	78.917	85.102	92.045	87.373	82.072	75.938	92.66	89.295	89.24	88.737	91.868	93.162	93.556	81.706	88.763	93.787	89.547	91.421	89.653	101.671	93.085	59.737	81.339	98.064	83.42	82.956	87.509	91.134	85.886	83.998	89.217	90	86.949	91.117	83.065	90.168	96.724	72.798	88.042	82.725	88.998	82.712	89.1	90
	84.954	87.61	83.445	87.222	90.033	78.917	85.102	92.045	87.373	82.072	75.938	92.66	89.295	89.24	88.737	91.868	93.162	100.167	81.706	88.763	93.787	89.547	91.421	89.653	101.671	93.085	59.737	99.207	98.064	83.42	82.956	87.509	91.134	85.886	83.998	89.217	90	86.949	91.117	83.065	90.168	96.724	72.798	90.063	82.725	88.998	82.712	89.1	90
	84.954	87.61	83.445	87.222	90.033	78.917	85.102	92.045	87.373	82.072	75.938	92.66	89.295	89.24	88.737	91.868	93.162	100.167	81.706	88.763	93.787	89.547	91.421	89.653	101.671	93.085	59.737	99.207	98.064	83.42	82.956	87.509	91.134	85.886	83.998	89.217	90	86.949	91.117	83.065	90.168	96.724	72.798	90.063	82.725	88.998	82.712	89.1	90
	84.954	87.61	83.445	92.268	90.033	78.917	85.102	92.045	87.373	82.072	75.938	76.794	89.295	89.24	88.737	91.868	93.162	90.008	81.706	88.763	93.787	89.547	91.421	89.653	101.671	93.085	59.737	99.207	98.064	83.42	82.956	87.509	91.134	85.886	83.998	89.217	90	86.949	91.117	83.065	90.168	82.186	72.798	89.477	82.725	88.998	82.712	89.1	90
	84.954	87.61	70.283	92.268	90.033	78.917	85.102	92.045	87.086	82.072	75.938	76.794	89.295	89.24	88.737	91.868	93.162	90.008	81.706	88.763	93.787	89.547	91.421	89.653	91.189	93.085	59.737	99.207	93.408	83.42	82.956	87.509	91.134	83.409	83.998	89.217	90	86.949	91.117	83.065	90.168	82.186	72.798	89.477	87.996	88.998	82.712	89.1	90
	88.216	87.61	70.283	92.268	90.033	78.917	85.102	92.045	87.086	82.072	75.938	76.794	89.295	89.24	88.737	91.868	93.162	90.008	81.706	88.763	93.787	89.547	91.421	89.653	91.189	93.085	59.737	99.207	93.408	83.42	82.956	87.509	91.134	83.409	83.998	89.217	90	86.949	91.117	83.065	90.168	82.186	72.798	89.477	87.996	88.998	82.712	89.1	90
	88.216	87.61	70.283	99.539	90.033	78.917	85.102	92.045	87.086	82.072	75.938	76.794	89.295	89.24	88.737	91.868	93.162	90.008	81.706	88.763	93.787	89.547	91.421	89.653	91.189	93.085	59.737	99.207	93.408	83.42	82.956	87.509	91.134	83.409	83.998	89.217	90	94.086	91.117	97.451	90.168	82.186	72.798	89.477	87.996	88.998	82.712	89.1	90
	88.216	87.61	76.911	99.539	90.033	78.917	85.102	92.045	87.086	82.072	75.938	94.765	89.295	89.24	88.737	91.868	93.162	90.008	81.706	88.763	89.467	89.547	91.421	89.653	91.189	93.085	59.737	99.207	93.408	83.42	80.693	87.509	91.134	83.409	83.998	89.217	90	94.086	91.117	97.451	90.168	82.186	72.798	89.477	87.996	88.998	82.712	89.1	90
	88.216	87.61	76.911	99.539	90.033	78.917	85.102	92.045	87.086	82.072	75.938	94.765	89.295	87.393	83.615	91.868	93.162	90.008	81.706	88.763	89.467	89.547	91.421	89.653	91.189	93.085	59.737	78.777	93.408	83.42	80.693	87.509	91.134	83.409	83.998	89.217	90	94.086	91.117	97.451	90.168	82.186	72.798	89.477	87.996	88.998	82.712	89.1	90
	88.216	87.61	76.911	99.539	90.033	78.917	85.102	92.045	87.086	82.072	75.938	94.765	89.295	87.393	83.615	91.868	93.162	90.008	81.706	88.763	89.467	89.547	91.421	89.653	89.729	93.085	59.737	78.777	93.408	83.42	81.118	87.509	91.134	83.409	83.998	89.217	90	94.086	91.117	98.041	90.168	82.186	72.798	89.477	87.996	88.998	82.712	89.1	90
	88.216	87.61	76.911	99.539	83.307	78.917	85.102	92.045	87.086	82.072	73.457	94.765	89.295	87.393	90.727	91.868	93.162	90.008	81.706	88.763	89.467	89.547	91.421	89.653	89.729	93.085	59.737	96.625	93.408	83.42	81.118	87.509	91.134	87.257	83.998	89.217	90	94.086	91.117	98.041	90.168	82.186	72.798	89.477	87.996	88.998	82.712	89.1	90
	88.216	87.61	80.634	87.928	83.307	78.917	85.102	92.045	87.086	82.072	73.457	94.765	89.295	87.393	90.727	91.868	93.162	89.282	81.706	88.763	89.467	89.547	91.421	89.653	83.11	93.085	59.737	96.625	93.408	83.42	81.118	87.509	91.134	87.257	83.998	89.217	90	94.086	91.117	98.041	90.168	82.186	72.798	89.477	87.996	88.998	82.712	89.1	90
	88.216	87.61	80.634	87.928	83.307	78.917	85.102	92.045	87.086	82.072	65.216	94.765	89.295	87.393	90.727	91.868	87.112	89.282	81.706	88.763	89.467	89.547	91.421	89.653	83.11	93.085	59.737	96.625	93.408	83.42	79.953	87.509	91.134	87.257	83.998	89.217	90	94.086	91.117	98.041	90.168	82.186	72.798	89.477	87.996	88.998	82.712	89.1	90
	88.216	87.61	80.634	87.928	87.581	78.917	85.102	92.045	87.086	82.072	65.216	94.765	89.295	87.393	90.727	91.868	87.112	89.282	81.706	88.763	89.467	89.547	91.421	89.653	83.11	93.085	59.737	86.779	93.408	83.42	79.953	87.509	91.134	87.257	83.998	92.364	90	91.414	91.117	98.041	90.168	82.186	72.798	89.477	87.996	88.998	82.712	89.1	90
	88.216	87.61	80.634	87.928	87.581	78.917	85.102	92.045	87.086	82.072	65.216	94.765	89.295	87.393	90.727	91.868	82.854	89.282	81.706	88.763	89.467	89.547	91.421	89.653	83.11	93.085	59.737	86.779	93.408	83.42	79.953	87.509	91.134	87.257	83.998	92.364	90	91.414	91.117	98.041	90.168	82.186	72.798	89.477	87.996	88.998	82.712	89.1	90
	88.216	87.61	80.634	87.928	95.272	78.917	85.102	92.045	87.086	82.072	65.216	94.765	89.295	87.393	90.727	91.868	82.854	89.282	81.706	88.763	89.467	89.547	91.421	87.768	83.11	93.085	59.737	86.779	100.938	83.42	79.953	87.509	91.134	87.257	83.998	89.659	90	91.414	91.117	98.041	90.168	82.186	72.798	89.477	87.996	88.998	82.712	89.1	90
	88.216	87.61	80.634	87.928	95.272	78.917	85.102	92.045	87.086	82.072	65.216	94.765	89.295	87.393	90.727	91.868	82.854	89.282	81.706	88.763	89.467	89.547	91.421	87.768	83.11	93.085	59.737	86.779	100.938	83.42	79.953	87.509	91.134	87.257	83.998	89.659	90	91.414	91.117	98.041	90.168	82.186	72.798	89.477	87.996	88.998	82.712	89.1	90
	88.216	87.61	80.634	87.928	95.272	78.917	85.102	92.045	87.086	82.072	65.216	94.765	89.295	86.854	90.727	91.868	82.854	89.282	81.706	88.763	89.467	89.547	91.421	87.768	83.11	93.085	59.737	86.779	100.938	83.42	79.953	87.509	91.134	87.257	83.998	89.659	90	88.506	91.117	98.041	90.168	82.186	72.798	89.477	87.996	88.998	82.712	89.1	90
	88.216	87.61	80.634	87.928	95.272	78.917	85.102	92.045	90.228	82.072	65.216	92.116	89.295	86.854	90.727	91.868	98.949	89.282	81.706	88.763	89.467	89.547	91.421	87.768	83.11	93.085	59.737	86.779	100.938	83.42	79.953	87.509	91.134	87.257	83.998	89.659	90	88.506	91.117	98.041	90.168	82.186	72.798	89.477	87.996	88.998	82.712	89.1	90
	88.216	87.61	80.634	87.928	97.938	78.917	85.102	92.045	90.228	82.072	65.216	92.116	89.295	86.854	90.727	91.868	98.949	89.282	81.706	88.763	89.467	89.547	91.421	87.768	86.611	93.085	59.737	86.779	100.938	83.42	79.953	90.595	91.134	87.257	83.998	89.659	90	88.506	91.117	98.041	90.168	82.186	77.473	89.477	87.996	88.998	82.712	89.1	90
	88.216	87.61	80.634	87.928	97.938	78.917	85.102	92.045	90.228	82.072	65.216	92.116	89.295	86.854	90.727	91.868	86.387	89.282	81.706	88.763	89.467	89.547	91.421	100.979	86.611	93.085	59.737	86.779	104.533	83.42	79.953	90.595	91.134	87.257	83.998	89.659	90	88.506	91.117	98.041	90.168	82.186	77.473	89.477	87.996	88.998	82.712	89.1	90
	88.216	87.61	80.634	87.928	97.938	78.917	85.102	92.045	90.228	82.072	65.216	92.116	89.295	86.854	90.727	91.868	86.387	89.282	81.706	88.763	89.467	89.547	91.421	100.979	86.611	93.085	59.737	86.779	104.533	83.42	79.953	90.595	91.134	87.257	83.998	92.052	90	88.506	91.117	98.041	90.168	82.186	77.473	89.477	87.996	88.998	82.712	89.1	90
	88.216	87.61	80.634	87.928	85.426	78.917	85.102	92.045	90.228	82.072	69.778	92.116	89.295	86.854	90.727	91.868	86.387	89.282	81.706	88.763	89.467	89.547	91.421	100.979	86.611	93.085	59.737	86.779	104.533	83.42	79.953	90.595	91.134	87.257	83.998	92.052	90	88.506	91.117	98.041	90.168	82.186	77.473	89.477	87.996	88.998	82.712	89.1	90
	88.216	87.61	80.634	87.928	85.426	78.917	84.149	92.045	90.228	82.072	69.778	92.116	89.295	86.854	90.727	91.868	89.747	89.282	81.706	88.763	89.467	89.547	91.421	100.979	86.611	86.62	59.737	86.779	104.533	83.42	79.953	90.595	91.134	87.257	83.998	92.052	90	88.506	91.117	98.041	90.168	82.186	77.473	89.477	87.996	88.998	82.712	89.1	90
	88.216	87.61	74.437	87.928	85.127	78.917	84.149	92.045	90.228	82.072	69.778	92.116	89.295	86.854	75.385	91.868	89.747	89.282	81.706	88.763	89.467	89.547	91.421	100.979	86.611	86.62	59.737	86.779	86.294	83.42	79.953	90.595	91.134	87.257	83.998	92.052	90	88.506	91.117	98.041	90.168	82.186	77.473	89.477	87.996	88.998	82.712	89.1	90
	88.216	92.125	74.437	87.928	85.127	78.917	84.149	92.045	93.154	82.072	69.778	92.116	89.295	86.854	75.385	91.868	89.747	89.282	81.706	88.763	89.467	89.547	91.421	100.979	86.611	86.62	59.737	86.779	86.294	83.42	79.953	90.595	91.134	87.257	83.998	92.052	90	88.506	91.117	93.372	90.168	82.186	77.473	89.477	87.996	88.998	82.712	89.1	90
	88.216	92.125	74.437	87.928	85.127	78.917	84.149	92.045	93.154	82.072	69.778	92.116	89.295	86.854	75.385	91.868	89.747	89.282	81.706	88.763	89.467	89.547	91.421	100.979	86.611	86.62	59.737	86.779	86.294	83.42	79.953	90.595	91.134	87.257	83.998	92.052	90	88.506	91.117	93.372	90.168	82.186	77.473	89.477	87.996	88.998	82.712	89.1	90
	88.216	92.125	74.437	87.928	88.629	78.917	84.149	92.045	93.154	82.072	69.778	92.116	89.295	86.854	75.385	91.868	89.747	89.282	81.706	88.763	89.467	89.547	91.421	100.979	86.611	81.557	59.737	86.779	86.294	83.42	79.953	90.526	91.134	87.257	83.998	92.052	90	88.506	91.117	93.372	90.168	82.186	77.473	89.477	87.996	88.998	82.712	89.1	90
	88.216	92.125	74.437	87.928	88.629	78.917	84.149	92.045	93.154	82.072	69.778	92.116	89.295	86.854	75.385	91.868	89.747	94.144	81.706	88.763	89.467	89.547	91.421	120.579	86.611	81.557	59.737	86.779	86.294	83.42	79.953	90.526	91.134	87.257	83.998	92.052	90	88.506	91.117	93.372	90.168	82.186	77.473	89.477	87.996	88.998	82.712	89.1	90
	88.216	92.125	74.437	87.928	88.629	78.917	84.357	92.045	93.154	82.072	69.778	88.492	89.295	86.854	75.385	91.868	89.747	94.144	81.706	88.763	89.467	89.547	91.421	120.579	86.611	81.557	59.737	86.779	94.634	83.42	79.953	90.526	91.134	87.257	83.998	92.052	90	88.506	91.117	93.372	90.168	82.186	77.473	89.477	87.996	88.998	82.712	89.1	90
	88.216	92.125	74.437	87.928	88.629	78.917	84.357	92.045	93.154	82.072	69.778	88.492	89.295	86.854	75.385	91.868	89.747	94.144	81.706	88.763	89.467	89.547	91.421	120.579	86.611	103.141	59.737	86.779	94.634	83.42	79.953	93.634	91.134	87.257	83.998	92.052	90	88.506	91.117	93.372	90.168	82.186	77.473	89.477	87.996	88.998	82.712	89.1	90
	88.216	92.125	74.437	82.929	88.629	78.917	84.357	92.045	91.668	82.072	69.778	88.492	89.295	86.854	77.14	91.868	89.747	94.144	81.706	88.763	89.467	89.547	91.421	120.579	86.611	87.064	59.737	86.779	94.634	83.42	79.953	93.634	91.134	87.257	83.998	92.052	90	88.506	91.117	93.372	90.168	82.186	77.473	89.477	87.996	88.998	82.712	89.1	90
	88.216	92.125	74.437	82.929	88.629	78.917	84.357	92.045	91.668	82.072	69.778	88.492	89.295	86.854	77.14	91.868	89.747	94.144	81.706	88.763	89.467	89.547	91.421	120.579	94.914	87.064	59.737	86.779	94.634	83.42	79.953	93.634	91.134	87.257	83.998	85.713	90	88.506	91.117	93.372	90.168	82.186	77.473	89.477	87.996	88.998	82.712	89.1	90
	88.02	92.125	74.437	79.319	88.629	78.917	84.357	92.045	91.668	82.072	69.778	88.492	89.295	86.854	77.14	91.868	89.747	96.519	81.706	88.763	89.467	89.547	91.421	85.274	94.914	87.064	59.737	86.779	94.054	83.42	79.953	93.634	91.134	87.257	83.998	85.713	90	88.506	95.905	93.372	90.168	82.186	77.473	89.477	87.996	88.998	82.712	89.1	90
	88.02	92.125	74.437	79.319	88.629	78.917	84.357	84.926	91.668	82.072	69.778	88.492	89.295	86.854	77.14	91.868	89.747	96.519	81.706	88.763	89.467	89.547	91.421	85.274	94.914	87.064	59.737	86.779	94.054	83.42	79.953	93.634	91.134	87.257	83.998	85.713	90	88.506	95.905	93.372	90.168	82.186	77.473	89.477	87.996	88.998	82.712	89.1	90
	88.02	92.125	74.437	89.852	88.629	78.917	84.357	84.926	91.668	82.072	69.778	88.492	89.295	86.854	77.14	91.868	89.747	96.519	81.706	88.763	89.467	104.442	91.421	85.274	94.914	87.064	59.737	86.779	94.054	83.42	79.953	93.634	91.134	87.257	83.998	85.713	90	88.506	95.905	93.372	90.168	82.186	77.473	89.477	87.996	88.998	82.712	89.1	90
	88.02	92.125	74.437	89.852	88.629	78.917	84.357	84.926	91.668	82.072	69.778	88.492	89.295	86.854	77.14	91.868	89.747	95.363	81.706	88.763	89.467	104.442	91.421	85.274	88.004	87.064	59.737	86.779	89.132	83.42	79.953	93.634	91.134	87.257	83.998	86.475	90	88.506	95.905	93.372	90.168	82.186	77.473	89.477	87.996	88.998	82.712	89.1	90
	88.02	92.125	74.437	93.311	88.629	78.917	84.357	84.926	91.668	82.072	69.778	88.294	89.295	86.854	77.14	91.868	89.747	95.363	81.706	88.763	89.467	104.442	91.421	85.274	88.004	87.064	59.737	86.779	89.132	83.42	79.953	93.634	91.134	87.257	83.998	86.475	90	88.506	95.905	93.372	90.168	82.186	77.473	89.477	87.996	88.998	82.712	89.1	90
	88.02	92.125	74.437	93.311	95.166	78.917	84.357	84.926	91.668	82.072	69.778	88.294	89.295	86.854	77.14	91.868	89.747	95.568	81.706	88.763	89.467	104.442	91.421	85.274	88.004	92.41	59.737	86.779	89.132	83.42	79.953	93.634	84.119	87.257	83.998	86.475	90	88.506	95.905	93.372	90.168	82.186	77.473	89.477	87.996	88.998	82.712	89.1	90
	88.02	92.125	74.437	93.311	95.166	78.917	84.357	84.926	91.668	82.072	69.778	88.294	89.295	86.854	77.14	91.868	89.747	95.568	81.706	88.763	89.467	104.442	91.421	85.274	90.534	92.41	59.737	86.779	89.132	83.42	79.953	93.634	84.119	87.257	83.998	86.475	90	88.506	95.905	93.372	90.168	82.186	77.473	89.477	87.996	88.998	82.712	89.1	90
	88.02	92.125	74.437	99.237	95.166	78.917	86.369	84.926	91.668	82.072	69.778	94.75	89.295	89.853	79.253	91.868	89.747	95.568	81.706	88.763	89.467	86.32	91.421	85.274	90.534	92.41	59.737	86.779	89.132	83.42	79.953	93.634	84.901	87.257	83.998	86.475	90	88.506	95.905	93.372	90.168	82.186	77.473	89.477	87.996	88.998	82.712	89.1	90
	88.02	92.125	79.212	99.237	95.166	78.917	86.369	84.926	91.668	82.072	69.778	94.75	89.295	89.853	79.253	91.868	89.747	94.156	81.706	88.763	89.467	86.32	91.421	85.274	90.534	92.41	59.737	74.754	89.132	83.42	79.953	93.634	95.565	87.257	83.998	86.475	90	88.506	95.905	93.372	90.168	82.186	77.473	89.477	87.996	88.998	82.712	89.1	90
	88.02	92.125	79.212	88.253	95.166	78.917	86.369	84.911	91.668	82.072	69.778	94.75	89.295	89.853	79.253	91.868	89.747	94.156	81.706	88.763	89.467	86.32	91.421	85.274	90.534	92.41	59.737	74.754	89.132	83.42	73.84	93.634	95.565	87.257	83.998	86.475	90	88.506	95.905	93.372	90.168	82.186	77.473	89.477	87.996	88.998	82.712	89.1	90
	88.02	92.125	79.212	88.253	95.166	78.917	86.369	84.911	91.668	82.072	69.778	94.75	89.295	89.853	79.253	91.868	89.747	94.156	81.706	88.763	89.467	86.32	91.421	91.625	88.161	92.41	59.737	94.806	89.132	83.42	73.84	93.634	91.755	87.257	83.998	86.475	90	88.506	91.084	93.372	90.168	82.186	77.473	89.477	87.996	88.998	82.712	89.1	90
	94.579	92.125	79.212	87.85	95.166	78.917	86.369	84.911	91.668	82.072	69.778	94.75	89.295	89.853	79.253	91.868	89.747	91.024	81.706	88.763	89.467	86.32	91.421	91.625	88.161	92.41	59.737	94.806	89.132	83.42	73.84	93.634	91.755	87.257	83.998	92.347	90	88.506	91.084	93.372	90.168	82.186	77.473	89.477	87.996	88.998	82.712	89.1	90
	94.579	92.125	79.212	87.85	95.166	78.917	86.369	84.911	91.668	82.072	69.778	94.75	89.295	89.853	79.253	91.868	89.747	91.024	81.706	88.763	89.467	86.32	91.421	91.625	88.161	84.914	66.81	94.806	89.132	83.42	73.84	93.634	91.755	87.257	83.998	92.347	90	88.506	91.084	93.372	90.168	82.186	77.473	89.477	87.996	88.998	82.712	89.1	90
	94.579	92.125	79.212	87.85	95.166	78.917	86.369	84.911	91.668	82.072	69.778	94.75	87.843	89.853	79.253	91.868	89.747	91.024	81.706	88.763	89.467	86.32	91.421	91.625	88.161	84.914	66.81	94.806	89.132	83.42	73.84	93.634	91.755	87.257	83.998	92.347	90	88.506	91.084	93.372	90.168	82.186	77.473	89.477	87.996	88.998	82.712	89.1	90
	94.579	92.125	79.212	98.664	87.798	78.917	86.369	84.911	91.668	82.072	69.778	94.75	87.843	89.853	79.253	91.868	89.747	89.954	81.706	92.063	89.467	84.174	91.421	91.625	88.161	84.914	66.81	94.806	89.132	83.42	73.84	93.634	91.755	87.257	83.998	92.347	90	88.506	91.084	93.372	90.168	82.186	77.473	89.477	87.996	88.998	82.712	89.1	90
	94.579	92.125	79.212	98.664	87.798	78.917	86.369	94.51	91.668	85.157	69.778	94.75	87.843	89.853	79.253	91.868	89.747	89.954	81.706	92.063	89.467	84.174	91.421	91.625	88.161	84.914	71.242	94.806	89.132	83.42	73.84	93.634	91.755	87.257	83.998	92.347	90	88.506	91.084	93.372	90.168	82.186	77.473	89.477	87.996	88.998	82.712	89.1	90
	94.579	92.125	79.212	93.625	87.798	78.917	86.369	94.51	91.668	85.157	69.778	94.75	87.843	89.853	68.842	91.868	89.747	89.954	81.706	87.346	89.467	84.174	91.421	91.625	94.898	84.914	71.242	94.806	89.132	83.42	73.84	93.634	87.595	87.257	83.998	92.347	90	88.506	91.084	93.372	90.168	82.186	77.473	89.477	87.996	88.998	82.712	89.1	90
	94.579	92.125	79.212	93.625	87.798	78.917	86.369	94.51	91.668	85.157	69.778	94.75	87.843	89.853	68.842	91.868	89.747	89.954	81.706	87.346	89.467	84.174	91.421	91.625	94.898	84.914	71.242	94.806	90.585	83.42	73.84	93.634	87.595	87.257	83.998	92.347	90	88.506	91.084	93.372	90.168	82.186	77.473	89.477	87.996	88.998	82.712	89.1	90
	94.579	92.125	79.212	93.625	88.814	78.917	86.369	94.51	91.668	85.157	69.778	94.75	87.843	89.853	68.842	91.868	89.747	89.954	81.706	87.346	89.467	84.174	91.421	106.838	94.898	84.914	71.242	94.806	90.585	83.42	73.84	93.634	85.64	87.257	83.998	92.347	90	88.506	91.084	93.372	90.168	82.186	77.473	89.477	87.996	88.998	82.712	89.1	90
	94.579	92.125	79.212	93.625	88.814	78.917	86.369	94.51	91.668	85.157	69.778	94.75	87.843	89.853	68.842	91.868	89.747	89.954	81.706	87.346	89.467	84.174	91.421	106.838	94.898	84.914	71.242	94.806	90.585	83.42	73.84	93.634	85.64	87.257	83.998	92.347	90	88.506	91.084	93.372	90.168	82.186	77.473	89.477	87.996	88.998	83.861	89.1	90
	94.579	92.125	79.212	93.625	88.814	78.917	83.01	94.51	91.668	85.157	69.778	94.75	87.843	89.853	68.842	91.868	89.747	89.954	81.706	87.346	89.467	84.404	91.421	106.838	92.197	84.914	71.242	94.806	90.585	83.42	73.84	93.634	85.64	87.257	83.998	92.347	90	88.506	91.084	93.372	90.168	82.186	77.473	89.477	87.996	88.998	83.861	89.1	90
	94.579	92.125	70.151	93.625	88.814	78.917	83.01	94.51	95.96	85.157	69.778	94.75	87.843	89.853	68.003	91.868	89.747	89.954	81.706	87.346	89.467	84.404	91.421	106.838	92.197	84.914	71.242	94.806	90.585	83.42	73.84	93.634	85.64	87.257	83.998	92.347	90	88.506	91.084	93.372	90.168	82.186	77.473	89.477	87.996	88.998	83.861	89.1	90
	94.579	92.125	70.151	93.625	88.814	78.917	83.01	89.049	95.96	85.157	69.778	94.75	87.843	89.853	68.003	91.868	89.747	94.233	81.706	87.346	89.467	84.404	91.421	106.838	92.197	84.914	71.242	94.806	90.585	83.42	73.84	93.634	85.64	87.257	83.998	92.347	90	88.506	91.084	93.372	90.168	82.186	77.473	89.477	87.996	88.998	83.861	89.1	90
	94.579	92.125	70.151	93.625	88.814	78.917	83.01	89.049	85.827	85.157	69.778	94.75	87.843	89.853	68.003	91.868	89.747	94.233	81.706	87.346	89.467	84.404	91.421	106.838	106.653	84.914	73.352	94.806	90.585	83.42	73.84	93.634	85.64	87.257	83.998	92.347	90	88.506	91.084	93.372	90.168	82.186	77.473	89.477	87.996	88.998	83.861	89.1	90
	94.579	92.125	73.658	93.625	88.814	78.917	83.01	89.049	85.827	85.157	69.778	94.75	87.843	89.853	68.003	91.868	89.747	94.233	81.706	87.346	89.467	84.404	91.421	106.838	106.653	84.914	73.352	94.806	95.265	83.42	73.84	93.634	85.64	87.257	83.998	92.347	90	88.506	91.084	93.372	90.168	82.186	77.473	89.477	112.76	88.998	83.861	89.1	90
	94.579	92.125	73.658	93.625	88.814	78.917	83.01	89.049	85.827	85.157	69.778	94.75	87.843	89.853	86.087	91.868	89.747	94.233	81.706	87.346	89.467	80.325	91.421	106.838	100.416	84.914	73.352	90.954	95.265	83.42	73.84	93.634	85.64	87.257	83.998	91.153	90	88.506	91.084	93.372	90.168	82.186	77.473	89.477	112.76	88.998	83.861	89.1	90
	94.579	92.125	82.455	93.625	88.814	78.917	84.415	89.049	85.827	85.157	69.778	94.75	87.843	93.058	86.087	91.868	89.747	94.233	81.706	87.346	89.467	80.325	91.421	106.838	100.416	84.914	70.516	90.954	95.265	83.42	73.84	93.634	85.64	87.257	83.998	91.153	90	88.506	91.084	93.372	90.168	82.186	77.473	89.477	94.475	88.998	83.861	89.1	90
	94.579	92.125	82.455	93.625	88.814	78.917	84.415	89.049	85.827	85.157	69.778	94.75	87.843	93.058	86.087	91.868	89.747	94.233	81.706	87.346	89.467	91.012	91.421	106.838	71.159	84.914	70.516	90.954	95.265	83.42	81.097	93.634	85.64	87.257	83.998	91.153	90	88.506	91.084	93.372	90.168	82.186	77.473	89.477	94.475	88.998	83.861	89.1	90
	94.579	92.125	82.455	93.625	88.814	78.917	86.615	89.049	103.141	85.157	69.778	94.75	87.843	93.058	86.087	91.868	89.747	94.233	81.706	87.346	89.467	91.012	91.421	106.838	71.159	84.914	70.516	90.954	95.265	83.42	81.097	93.634	85.64	87.257	83.998	91.153	90	88.506	91.084	93.372	90.168	82.186	77.473	89.477	94.475	88.998	83.861	89.1	90
	89.95	92.125	82.455	93.625	88.814	78.917	86.615	89.049	103.141	85.157	69.778	94.75	87.843	93.058	85.627	91.868	89.747	94.233	81.706	87.346	89.467	91.012	91.421	106.838	84.149	84.914	78.192	90.954	95.265	83.42	81.097	99.935	91.689	87.257	83.998	91.153	90	88.506	91.084	93.372	90.168	82.186	77.473	89.477	94.475	88.998	83.861	89.1	90
	89.95	92.125	82.455	93.625	88.814	78.917	84.284	89.049	103.141	85.157	69.778	94.75	87.843	93.058	85.627	91.868	89.747	94.233	81.706	87.346	89.467	91.012	91.421	106.838	84.149	84.914	78.192	90.954	95.265	83.42	81.097	99.935	91.689	87.257	83.998	91.153	90	88.506	91.084	93.372	90.168	82.186	77.473	89.477	94.475	88.998	83.861	89.1	90
	89.95	92.125	82.455	93.625	88.814	78.917	84.284	89.049	103.141	85.157	69.778	94.75	87.843	93.058	85.627	91.868	89.747	94.233	81.706	87.346	89.467	91.012	91.421	106.838	84.149	84.914	78.192	90.954	95.265	83.42	81.097	99.935	91.689	87.257	83.998	91.153	90	88.506	91.084	93.372	90.168	82.186	77.473	89.477	94.475	88.998	83.861	89.1	90
	89.95	92.125	82.455	93.625	88.814	78.917	84.284	87.446	97.965	85.157	69.778	94.75	87.843	93.058	85.627	91.868	89.747	94.233	81.706	87.346	89.467	91.012	91.421	106.838	84.149	84.914	78.192	90.954	95.265	83.42	81.097	99.935	91.689	87.257	83.998	91.153	90	88.506	91.084	93.372	90.168	82.186	77.473	89.477	94.475	88.998	83.861	89.1	90
	89.95	92.125	82.455	85.817	88.814	78.917	84.284	87.446	97.965	85.157	69.778	94.75	87.843	93.058	85.627	91.868	89.747	94.233	81.706	87.346	89.467	91.012	91.421	106.838	84.149	84.914	78.192	90.954	95.265	83.42	81.097	99.935	91.689	87.257	83.998	91.153	90	88.506	91.084	93.372	90.168	82.186	77.473	89.477	94.475	88.998	83.861	89.1	90
	89.95	92.125	80.014	85.817	88.814	78.917	84.284	87.446	97.965	85.157	69.778	94.75	87.843	93.058	85.627	91.868	89.747	94.233	81.706	87.346	89.467	91.012	91.421	106.838	84.149	84.914	78.192	90.954	95.265	97.005	81.097	99.935	91.689	87.257	83.998	91.153	90	88.506	91.084	93.372	90.168	82.186	77.473	89.477	94.475	88.998	83.861	89.1	90
	89.95	92.125	80.014	85.817	88.814	78.917	84.284	87.446	97.965	85.157	69.778	94.75	87.843	93.058	85.627	91.868	89.747	94.233	81.706	87.346	89.467	91.012	91.421	89.137	87.163	84.914	78.192	90.954	95.265	97.005	81.097	90.101	91.689	87.257	83.998	91.153	90	88.506	91.084	93.372	90.168	82.186	77.473	89.477	94.475	88.998	83.861	89.1	90
	89.95	92.125	80.014	85.817	88.814	78.917	84.284	94.36	97.965	85.157	69.778	94.75	87.843	93.058	85.627	91.997	89.747	94.233	81.706	87.346	89.467	91.012	91.421	89.137	87.163	84.914	78.192	90.954	95.265	97.005	81.097	90.101	91.689	87.257	83.998	91.153	90	88.506	91.084	93.372	90.168	82.186	77.473	89.477	94.475	88.998	83.861	89.1	90
	89.95	92.125	80.014	85.817	89.685	78.917	80.925	94.36	97.965	85.157	69.778	94.75	87.843	93.058	85.627	91.997	89.747	94.233	81.706	87.346	89.467	91.012	91.421	89.137	87.163	84.914	78.192	90.954	95.265	97.005	81.097	90.101	91.689	87.257	83.998	91.153	90	88.506	91.084	93.372	90.168	82.186	77.473	89.477	94.475	88.998	83.861	89.1	90
	89.95	92.125	80.014	86.298	89.685	78.917	80.925	94.36	97.965	85.157	69.778	94.75	87.843	93.058	85.627	91.997	89.747	94.233	81.706	89.491	89.467	91.012	91.421	89.137	87.163	84.914	78.192	90.954	95.265	88.397	83.146	90.101	91.689	87.257	83.998	91.153	90	88.506	91.084	93.372	90.168	86.618	77.473	89.477	94.475	88.998	83.861	89.1	90
	89.95	92.125	80.014	86.298	89.685	78.917	80.925	94.36	95.181	85.157	69.778	94.75	87.843	101.705	85.627	91.997	89.747	86.31	81.706	89.491	89.467	91.012	91.421	89.137	87.163	84.914	78.192	90.954	95.265	88.397	83.146	90.101	91.689	87.257	83.998	91.153	90	88.506	91.084	93.372	90.168	86.618	77.473	89.477	94.475	88.998	83.861	89.1	90
	89.95	92.125	80.014	86.298	89.685	78.917	80.925	94.36	95.181	85.157	69.778	94.75	88.735	101.705	85.627	91.997	89.747	86.31	81.706	89.491	89.467	91.012	91.421	89.137	87.163	84.914	78.192	90.954	95.265	87.902	83.146	90.101	91.689	87.257	83.998	91.153	90	88.506	91.084	93.372	90.168	86.618	77.473	89.477	94.475	88.998	83.861	89.1	90
	89.95	92.125	80.014	86.298	89.685	78.917	84.478	94.36	95.181	85.157	69.778	94.75	88.735	101.705	85.627	91.997	89.747	86.31	81.706	89.491	89.467	91.012	91.421	89.137	87.163	84.914	78.192	90.954	95.265	87.902	83.146	90.101	91.689	87.257	83.998	91.153	90	88.506	91.084	93.372	90.168	86.618	77.473	89.477	94.475	88.998	83.861	89.1	90
	89.95	92.125	80.014	86.298	89.685	78.917	84.478	94.36	95.181	85.157	69.778	95.408	88.735	83.499	85.627	91.997	89.747	86.31	81.706	89.491	89.467	91.012	91.421	89.137	87.163	84.914	78.192	90.954	95.265	87.902	85.553	90.101	91.689	87.257	83.998	91.153	90	88.506	91.084	93.372	90.168	86.618	77.473	89.477	94.475	88.998	83.861	89.1	90
	89.95	92.125	80.014	86.298	89.685	78.917	84.478	81.937	95.181	85.157	69.778	95.408	88.735	83.499	85.627	96.279	89.747	86.31	81.706	89.491	89.467	91.012	91.421	89.137	87.163	84.914	78.192	90.954	105.592	87.902	85.553	90.101	91.689	87.257	83.998	91.153	90	88.506	91.084	93.372	90.168	86.618	77.473	89.477	94.475	88.998	83.861	89.1	90
	89.95	92.125	80.014	86.298	89.685	78.917	84.478	81.937	95.181	85.157	69.778	95.408	88.735	83.499	80.232	96.279	89.747	86.31	81.706	89.491	89.467	91.012	91.421	89.137	87.163	84.914	78.192	90.954	105.592	87.902	85.553	90.101	91.689	87.257	83.998	91.153	90	88.506	91.084	93.372	90.168	86.618	77.473	89.477	88.334	88.998	83.861	89.1	90
	89.95	92.125	80.014	86.298	89.685	78.917	84.478	98.663	95.181	85.157	69.778	95.408	88.735	83.499	80.232	96.279	89.747	88.485	81.706	89.491	89.467	91.012	91.421	89.137	88.091	84.914	78.192	90.954	105.592	87.902	79.409	90.101	91.689	87.257	83.998	91.153	90	88.506	91.084	93.372	90.168	86.618	77.473	89.477	88.334	88.998	83.861	89.1	90
	89.95	92.125	80.014	86.298	89.685	78.917	84.478	98.663	95.181	85.157	69.778	95.408	84.678	83.499	80.232	96.279	89.747	88.485	81.706	89.491	89.467	91.012	91.421	89.137	88.091	84.914	78.192	90.954	105.592	87.902	79.409	90.101	91.689	87.257	83.998	91.153	90	88.506	91.084	93.372	90.168	86.618	77.473	89.477	88.334	88.998	83.861	89.1	90
	89.95	92.125	80.014	86.298	89.685	78.917	84.478	98.663	95.181	85.157	69.778	95.408	84.678	83.499	80.232	96.279	89.747	88.485	81.706	89.491	89.467	91.012	91.421	89.137	88.091	84.914	78.192	90.954	83.55	87.902	79.409	90.101	91.689	87.257	83.998	91.153	90	88.506	91.084	93.372	90.168	86.618	77.473	89.477	88.334	88.998	83.861	89.1	90
	89.95	92.125	80.014	86.298	89.685	78.917	84.478	88.389	95.181	85.157	69.778	95.408	84.678	83.499	80.232	96.279	89.747	88.485	81.706	89.491	89.467	91.012	91.421	89.137	88.091	84.914	78.192	90.954	83.55	87.902	79.409	90.101	91.689	87.257	83.998	88.444	90	88.506	91.084	93.372	90.168	86.618	77.473	89.477	85.866	88.998	83.861	89.1	90
	89.95	92.125	80.014	90	89.685	78.917	84.478	88.389	95.181	85.157	69.778	95.408	84.678	83.499	80.232	96.279	89.747	88.485	81.706	89.491	89.467	91.012	91.421	89.137	88.091	84.914	78.192	90.954	83.55	83.801	80.321	90.101	91.689	87.257	83.998	88.444	90	88.506	91.084	93.372	90.168	86.618	77.473	89.477	85.866	88.998	83.861	89.1	90
	89.95	92.125	80.014	90	89.685	78.917	84.478	88.389	95.181	85.157	69.778	95.408	84.678	83.499	78.611	96.279	89.747	88.485	81.706	89.491	89.467	91.012	91.421	89.137	88.091	84.914	78.192	90.954	83.55	83.525	80.321	90.101	91.689	87.257	83.998	88.444	90	88.506	91.084	93.372	90.168	86.618	77.473	89.477	85.866	88.998	83.861	89.1	90
	89.95	92.125	80.014	90	89.685	78.917	84.478	88.389	95.181	86.312	69.778	95.408	84.678	83.499	78.611	96.279	89.747	88.485	81.706	89.491	89.467	91.012	91.421	89.137	88.091	84.914	78.192	90.954	83.55	83.525	80.321	90.101	91.689	87.257	83.998	88.444	90	88.506	91.084	93.372	90.168	86.618	77.473	89.477	85.866	88.998	83.861	89.1	90
	89.95	92.125	80.014	90	89.685	78.917	84.478	88.389	95.181	86.312	69.778	95.408	84.678	83.499	78.611	96.279	89.747	88.485	81.706	89.491	89.467	91.012	91.421	89.137	88.091	84.914	78.192	90.954	83.55	83.525	80.321	90.101	91.689	87.257	83.998	88.444	90	88.506	91.084	93.372	90.168	86.618	77.473	89.477	105.931	88.998	83.861	89.1	90
	89.95	92.125	80.014	90	89.685	78.917	84.478	88.389	95.181	86.312	69.778	84.171	90.924	88.942	78.611	96.279	89.747	88.485	81.706	89.491	89.467	91.012	79.705	89.137	90.509	84.914	78.192	90.954	83.55	83.525	80.321	90.101	91.516	87.257	83.998	88.444	90	88.506	91.084	93.372	90.168	86.618	77.473	89.477	105.931	88.998	83.861	89.1	90
	89.95	92.125	80.014	94.561	89.685	78.917	84.478	88.389	95.181	86.312	69.778	84.171	90.924	88.942	78.611	96.279	89.747	88.485	81.706	89.491	89.467	91.012	79.705	89.137	90.509	84.914	78.192	90.954	92.141	94.776	80.321	86.912	91.516	87.257	83.998	88.444	90	88.506	91.084	93.372	90.168	86.618	77.473	89.477	105.931	88.998	83.861	89.1	90
	89.95	92.125	80.014	94.561	89.685	78.917	84.478	88.389	95.181	86.312	69.778	84.171	90.924	88.942	78.611	96.279	89.747	88.485	81.706	89.491	89.467	91.012	79.705	89.137	90.509	84.914	78.192	90.954	92.141	94.776	79.476	86.912	91.516	87.257	83.998	88.444	90	88.506	91.084	93.372	90.168	86.618	77.473	89.477	105.931	88.998	83.861	89.1	90
	89.95	92.125	80.014	94.561	89.685	78.917	84.478	88.389	91.286	81.864	69.778	84.171	90.924	88.942	78.611	96.279	89.747	88.485	81.706	89.491	89.467	91.012	80.123	89.137	90.509	89.99	79.038	90.954	92.141	94.776	79.476	86.912	91.516	87.257	83.998	88.444	90	88.506	91.084	93.372	90.168	86.618	77.473	89.477	105.931	88.998	83.861	89.1	90
	89.95	92.125	80.014	94.561	89.685	78.917	84.478	88.389	91.286	81.864	69.778	84.171	90.924	88.942	78.611	96.279	89.747	88.485	81.706	89.491	89.467	91.012	70.127	89.137	90.509	89.99	79.038	90.954	89.019	94.776	75.079	86.912	91.516	87.257	83.998	88.444	90	91.646	91.084	93.372	90.168	86.618	77.473	89.477	105.931	88.998	83.861	89.1	90
	89.95	92.125	80.014	94.561	90.944	78.917	84.416	88.389	91.286	81.864	69.778	84.171	90.924	88.942	78.611	96.279	89.747	88.485	81.706	89.491	89.467	91.012	70.127	91.259	90.509	89.99	79.038	90.954	89.019	94.776	75.079	86.912	91.516	87.257	83.998	88.416	90	91.646	91.084	93.372	90.168	86.618	77.473	89.477	105.931	88.998	83.861	89.1	90
	89.95	92.125	80.014	94.561	90.944	78.917	84.416	88.389	91.286	81.864	69.778	84.171	90.924	88.942	78.611	96.279	89.747	88.485	81.706	89.491	90.63	91.012	79.537	91.259	90.509	88.372	79.038	90.954	89.019	94.776	83.375	86.912	91.516	87.257	83.998	88.416	90	91.646	91.084	93.372	90.168	86.618	77.473	89.477	105.931	88.998	83.861	89.1	90
	89.95	92.125	80.014	94.561	90.944	78.917	84.416	88.389	89.25	81.864	69.778	84.171	90.924	88.942	78.611	96.279	89.747	80.809	81.706	89.491	90.63	91.012	79.537	91.259	90.509	88.372	79.038	90.954	89.019	88.946	83.375	86.912	91.516	87.257	83.998	88.416	90	91.646	91.084	93.372	90.168	86.618	77.473	89.477	81.978	88.998	83.861	89.1	90
	89.95	92.125	80.014	94.561	90.944	78.917	84.416	88.389	89.25	81.864	69.778	84.171	90.924	88.942	78.611	96.279	89.747	80.809	81.706	89.491	90.63	91.012	79.537	91.259	90.509	88.372	76.629	90.954	89.019	88.946	67.621	86.912	91.516	87.257	83.998	88.416	90	91.646	91.084	93.372	90.168	86.618	77.473	89.477	81.978	88.998	83.861	89.1	90
	89.95	92.125	80.014	94.561	90.944	78.917	84.416	88.389	89.25	81.864	69.778	84.171	90.924	88.942	78.611	96.279	89.747	80.809	81.706	89.491	90.63	91.012	79.537	91.259	90.509	88.372	76.629	90.954	89.019	88.946	67.621	86.912	91.516	87.257	83.998	88.416	90	91.646	91.084	93.372	90.168	86.618	77.473	89.477	88.299	88.998	83.861	89.1	90
	89.95	92.125	80.014	94.561	90.944	78.917	84.416	88.389	89.25	81.864	69.778	84.171	90.924	88.942	77.854	96.279	89.747	80.809	81.706	89.491	90.63	91.012	79.537	91.259	92.754	88.372	76.629	90.954	89.019	88.946	67.621	86.912	91.516	87.257	83.998	88.416	90	91.646	91.084	93.372	90.168	86.618	77.473	89.477	88.299	88.998	83.861	89.1	90
	89.95	92.125	80.014	94.561	90.944	78.917	84.416	88.389	89.25	81.864	69.778	84.171	90.924	88.942	77.854	84.433	89.747	80.809	81.706	89.491	90.63	91.012	79.537	91.259	92.754	88.372	76.629	90.954	89.019	88.946	67.621	86.912	85.349	87.257	83.998	88.416	90	91.646	91.084	93.372	90.168	86.618	77.473	89.477	88.299	88.998	83.861	89.1	90
	89.95	92.125	80.014	94.561	88.158	78.917	84.416	88.389	89.25	81.864	69.778	84.171	90.924	88.942	68.345	84.433	89.747	80.809	81.706	89.491	90.63	91.012	79.537	91.259	92.754	88.372	76.629	90.954	89.019	88.946	67.621	86.912	85.349	87.257	83.998	88.416	90	91.646	91.084	93.372	90.168	86.618	77.473	89.477	88.299	88.998	83.861	89.1	90
	89.95	92.125	80.014	85.447	88.158	78.917	84.416	88.389	89.25	81.864	69.778	84.171	90.924	88.942	68.345	85.903	89.747	80.809	81.706	89.491	90.63	100.944	79.537	91.259	92.754	88.372	76.629	90.954	71.988	88.946	67.621	86.912	87.96	87.257	83.998	88.416	90	91.646	91.084	93.372	90.168	86.618	77.473	89.477	88.299	88.998	83.861	89.1	90
	89.95	92.125	80.014	85.447	88.158	78.917	84.416	88.389	89.25	81.864	69.778	84.171	90.924	88.085	68.345	85.903	89.747	80.809	81.706	89.491	90.63	100.944	79.537	91.259	92.754	88.372	76.629	90.954	71.988	88.946	67.621	86.912	87.96	87.257	83.998	88.416	90	91.646	91.084	93.372	90.168	86.618	77.473	89.477	88.299	88.998	83.861	89.1	90
	89.95	92.125	80.014	85.447	88.179	78.917	84.416	88.389	89.25	81.864	69.778	84.171	90.924	88.085	68.345	85.903	89.747	80.809	81.706	89.491	90.63	100.944	67.976	91.259	92.754	88.372	62.918	90.954	71.988	88.946	67.621	86.912	87.96	87.257	83.998	88.416	90	91.646	91.084	93.372	90.168	86.618	77.473	89.477	93.745	88.998	83.861	89.1	90
	89.95	92.125	80.014	85.447	90.408	78.917	84.416	88.389	89.25	81.864	69.778	84.171	90.924	86.117	68.345	85.903	89.747	80.809	81.706	89.491	90.63	100.944	67.976	91.259	92.754	88.372	62.918	90.954	71.988	88.946	67.621	86.912	87.96	90.68	83.998	88.416	90	91.646	91.084	93.372	90.168	86.618	77.473	89.477	93.745	88.998	83.861	89.1	90
	89.95	92.125	80.014	85.447	90.408	78.917	84.416	88.389	85.347	81.864	69.778	82.524	90.924	86.117	75.928	85.903	89.747	80.809	81.706	89.491	90.63	97.2	67.976	91.259	92.754	88.372	62.918	90.954	71.988	88.946	67.621	86.912	87.96	90.68	83.998	89.425	90	91.646	91.084	93.372	90.168	86.618	77.473	89.477	93.745	88.998	83.861	89.1	90
	89.95	92.125	80.014	85.447	90.408	78.917	85.956	88.389	85.347	81.864	69.778	82.524	90.924	86.117	75.928	85.903	89.747	80.809	81.706	89.491	90.63	97.2	67.976	91.259	92.754	88.372	62.918	90.954	82.593	88.946	67.621	86.912	87.96	90.68	83.998	89.425	90	91.646	91.084	93.372	90.168	86.618	77.473	89.477	93.745	88.998	83.861	89.1	90
	89.95	92.125	80.014	85.447	90.408	78.917	85.956	88.389	85.347	81.864	69.778	86.911	90.924	86.117	75.928	85.903	89.747	87.56	81.706	89.491	90.63	97.2	73.286	91.259	92.754	88.372	62.918	90.954	82.593	88.946	67.621	86.912	87.96	90.68	83.998	89.425	90	91.646	91.084	93.372	90.168	86.618	77.473	89.477	93.745	88.998	83.861	89.1	90
	89.95	92.125	80.014	85.447	90.408	78.917	85.956	88.389	85.347	81.864	69.778	86.911	90.924	86.117	75.928	85.903	89.747	87.56	81.706	89.491	90.63	97.2	73.286	91.259	92.754	88.372	81.751	90.954	82.593	88.946	67.621	86.912	87.96	90.68	83.998	89.425	90	91.646	91.084	93.372	90.168	86.618	77.473	89.477	93.745	88.998	88.349	89.1	90
	89.95	92.125	80.014	85.447	90.408	78.917	84.393	88.389	85.347	81.864	69.778	86.911	92.389	86.117	72.387	85.903	89.747	87.56	81.706	89.491	90.63	97.2	73.286	91.259	92.754	88.372	81.751	90.954	82.593	88.946	67.621	86.912	87.96	90.68	83.998	89.425	90	91.646	91.084	93.372	90.168	86.618	77.473	89.477	93.745	88.998	88.349	89.1	90
	89.95	92.125	80.014	88.473	90.408	78.917	84.393	88.389	85.347	81.864	69.778	86.911	92.389	86.117	72.387	85.903	89.747	87.56	81.706	89.491	90.63	97.2	73.286	91.259	92.754	88.372	67.526	90.954	90	88.946	67.621	86.912	87.96	85.547	83.998	89.425	90	91.646	91.084	93.372	90.168	86.618	77.473	89.477	87.508	88.998	88.349	89.1	90
	89.95	92.125	80.014	88.473	90.408	78.917	84.393	88.389	85.347	81.864	69.778	86.911	92.389	86.117	72.387	85.903	89.747	87.56	81.706	89.491	90.63	97.2	73.286	91.259	92.754	88.372	67.526	90.954	90	88.946	67.621	86.912	86.766	85.547	83.998	89.425	90	91.646	91.084	91.625	90.168	86.618	77.473	89.477	87.508	88.998	88.349	89.1	90
	89.95	92.125	83.158	88.473	90.408	78.917	84.393	88.389	85.347	81.864	69.778	86.911	92.389	86.117	56.501	85.903	89.747	87.56	81.706	89.491	90.63	97.2	73.286	91.259	90	88.372	67.526	90.954	90	88.946	67.621	86.912	86.766	85.547	83.998	89.425	90	91.646	91.084	91.625	90.168	86.618	77.473	89.477	87.508	88.998	88.349	89.1	90
	89.95	92.125	83.158	88.473	90.408	78.917	84.393	88.389	85.347	81.864	69.778	86.911	92.389	86.117	56.501	85.903	89.747	87.56	81.706	89.491	90.63	97.2	73.286	91.259	90	88.372	67.526	90.954	90	88.946	67.621	86.912	86.766	85.547	83.998	89.425	90	91.646	91.084	91.625	90.168	86.618	77.473	89.477	87.508	88.998	88.349	89.1	90
	89.95	92.125	86.189	88.473	90.408	78.917	84.393	88.389	85.347	81.864	69.778	86.911	92.389	86.117	80.651	85.903	89.747	87.56	81.706	89.491	90.63	97.2	73.286	91.259	90	88.372	59.317	90.954	90	88.946	67.621	86.912	86.766	85.547	83.998	89.425	90	91.646	91.084	91.625	90.168	86.618	77.473	89.477	87.508	88.998	88.349	89.1	90
	89.95	92.125	86.189	88.473	90.408	78.917	84.393	88.389	85.347	87.556	69.778	86.911	92.389	86.117	80.651	85.903	89.747	87.56	81.706	89.491	90.63	97.2	73.286	91.259	90	88.372	59.317	90.954	90	88.946	67.621	86.912	86.766	85.547	83.998	89.425	90	91.646	91.084	91.625	90.168	86.618	77.473	89.477	87.508	88.998	88.349	89.1	90
	89.95	92.125	86.189	88.473	90.408	78.917	84.393	88.389	85.347	87.556	69.778	86.911	92.389	86.117	80.651	85.903	89.747	87.56	81.706	89.491	90.63	97.2	73.286	91.259	90	88.372	59.317	90.954	90.433	88.946	67.621	86.912	86.766	85.547	83.998	89.425	90	91.646	91.084	91.625	90.168	86.618	77.473	89.477	101.843	88.998	88.349	89.1	90
	89.95	92.125	86.189	88.473	90.408	78.917	84.393	88.389	85.347	87.556	69.778	86.911	92.389	86.117	80.651	85.903	89.747	87.56	81.706	89.491	90.63	97.2	73.286	91.259	90	88.372	59.317	90.954	90.433	88.946	67.621	86.912	86.766	85.547	83.998	89.425	90	91.646	91.084	91.625	90.168	86.618	77.473	89.477	101.843	88.998	88.349	89.1	90
	89.95	92.125	86.189	88.473	90.408	78.917	84.393	91.351	85.347	74.922	69.778	86.911	92.389	86.117	80.651	85.903	89.747	87.56	81.706	97.326	90.63	97.2	73.286	91.259	90	88.372	59.317	90.954	90.433	86.626	67.621	86.912	86.766	85.547	83.998	89.425	90	91.646	91.084	91.625	90.168	86.618	77.473	89.477	101.843	88.998	88.349	89.1	90
	89.95	92.125	86.189	85.857	90.408	78.917	80.126	91.351	85.347	74.922	69.778	86.911	92.389	86.117	80.651	85.903	89.747	87.56	81.706	97.326	90.63	97.2	73.286	91.259	90	88.372	59.317	90.954	90.433	86.626	67.621	86.912	86.766	85.547	83.998	89.425	90	91.646	91.084	91.625	90.168	84.431	77.473	89.477	85.394	88.998	88.349	89.1	90
	89.95	92.125	86.189	85.857	90.408	78.917	80.126	91.351	85.347	74.922	69.778	92.171	92.389	86.117	80.651	85.903	89.747	87.56	81.706	97.326	90.63	97.2	73.286	91.259	90	88.372	72.343	90.954	90.433	86.626	67.621	86.912	86.766	85.547	83.998	89.425	90	91.646	91.084	91.625	90.168	84.431	77.473	89.477	85.394	88.998	88.349	89.1	90
	89.95	89.823	86.189	85.857	90.408	78.917	80.126	88.649	85.347	74.922	69.778	92.171	92.389	86.117	80.651	85.903	89.747	87.56	81.706	97.326	90.63	97.2	73.286	91.259	90	88.372	72.343	90.954	90.433	86.626	67.621	86.912	86.766	85.547	83.998	89.425	90	91.646	91.084	91.625	90.168	84.431	77.473	89.477	85.394	88.998	88.349	89.1	90
	89.95	89.823	86.189	85.857	84.362	78.917	86.874	88.649	85.347	74.922	69.778	88.024	92.389	86.117	80.651	85.903	89.747	87.56	81.706	97.326	90.63	97.2	65.385	91.259	90	88.372	72.343	90.954	89.567	86.626	67.621	86.912	86.766	85.547	83.998	89.425	90	91.646	91.084	91.625	90.168	86.85	77.473	89.477	85.394	88.998	88.349	89.1	90
	89.95	89.823	86.189	96.728	84.362	78.917	86.874	88.649	85.347	74.922	69.778	88.024	92.389	86.117	80.651	85.903	89.747	87.56	81.706	97.326	90.63	84.482	65.385	91.259	99.48	88.372	72.343	90.954	89.567	86.626	67.621	86.912	86.766	85.547	83.998	89.425	90	91.646	91.084	91.625	90.168	86.85	77.473	89.477	85.394	88.998	88.349	89.1	90
	89.95	89.823	86.189	96.728	84.362	78.917	82.198	90	85.347	74.922	69.778	88.024	92.389	86.117	80.651	85.903	89.747	87.56	81.706	97.326	90.63	84.482	65.385	91.259	99.48	88.372	72.343	90.954	89.567	86.626	67.621	86.912	86.766	85.547	83.998	89.425	90	91.646	91.084	91.625	90.168	86.85	77.473	89.477	85.394	88.998	88.349	89.1	90
	89.95	89.823	86.189	96.728	84.362	78.917	82.198	90	85.347	74.922	69.778	88.024	92.389	86.117	80.651	85.903	89.747	87.56	81.706	97.326	90.63	97.435	65.385	91.259	82.41	88.372	66.325	90.954	89.567	86.626	67.621	86.912	86.766	85.547	83.998	89.425	90	91.646	91.084	91.625	90.168	86.85	77.473	89.477	88.972	88.998	88.349	89.1	90
	89.95	89.823	86.189	91.941	84.362	78.917	82.198	90	85.347	74.922	69.778	88.024	92.389	86.117	80.651	85.903	89.747	87.56	81.706	97.326	90.63	97.435	65.385	91.259	82.41	88.372	66.325	90.954	89.567	86.626	67.621	86.912	86.766	85.547	83.998	89.425	90	91.646	91.084	91.625	90.168	86.85	77.473	89.477	88.972	88.998	88.349	89.1	90
	89.95	89.823	86.189	91.941	84.362	78.917	82.198	90	85.347	74.922	69.778	88.024	92.389	86.117	80.651	85.903	89.747	87.56	81.706	86.137	90.63	97.435	65.385	91.259	82.41	88.372	66.325	88.064	89.567	86.626	67.621	86.912	86.766	85.547	83.998	89.425	90	91.646	92.6	91.625	90.168	86.85	77.473	89.477	94.67	88.998	88.349	89.1	90
	89.95	89.823	86.189	91.941	84.362	78.917	85.644	90	91.035	74.922	69.778	88.024	92.389	86.117	80.651	85.903	89.747	87.56	81.706	86.137	90.63	97.435	65.385	91.259	82.41	88.372	64.144	88.064	82.498	86.626	67.621	86.912	86.766	85.547	79.172	89.425	90	91.646	92.6	91.625	90.168	86.85	77.473	89.477	94.67	88.998	88.349	89.1	90
	89.95	89.823	86.189	91.941	93.557	78.917	85.644	90	91.035	74.922	69.778	89.404	92.389	86.117	80.651	85.903	89.747	87.56	81.706	86.137	90.63	97.435	78.156	91.259	82.41	88.372	64.144	88.064	82.498	86.626	67.621	86.912	86.766	85.547	79.172	89.425	90	91.646	92.6	91.625	90.168	86.85	77.473	89.477	83.982	88.998	88.349	89.1	90
	89.95	93.687	86.189	87.163	93.557	78.917	85.644	90	91.035	74.922	69.778	89.404	89.389	86.117	80.651	85.903	89.747	87.56	81.706	86.137	90.63	97.435	78.156	91.259	82.41	88.372	64.144	88.064	82.498	86.626	67.621	86.912	86.766	85.547	79.172	89.425	90	95.134	92.6	91.625	90.168	86.85	77.473	89.477	83.982	88.998	88.349	89.1	90
	89.95	93.687	86.189	87.163	93.557	78.917	85.644	90	91.035	74.922	69.778	89.404	89.389	86.117	80.651	85.903	89.747	87.56	81.706	86.137	90.63	97.435	78.156	91.259	82.41	88.372	66.76	88.064	81.03	86.626	67.621	86.912	86.766	85.547	79.172	89.425	90	95.134	92.6	91.625	90.168	92.385	77.473	89.477	83.982	88.998	88.349	89.1	90
	89.95	98.172	86.189	87.163	93.557	78.917	79.271	90	91.035	74.922	69.778	89.404	89.389	86.117	80.651	85.903	89.747	87.56	81.706	86.137	90.63	97.435	78.156	91.259	82.41	110.48	66.76	88.064	81.03	86.626	67.621	86.912	86.766	85.547	79.172	89.425	90	95.134	92.6	91.625	90.168	92.385	77.473	89.477	83.982	88.998	88.349	89.1	90
	89.95	98.172	86.189	87.163	93.557	78.917	79.271	90.828	91.035	74.922	69.778	89.404	89.389	86.117	80.651	85.903	89.747	87.56	81.706	86.137	90.63	97.435	78.156	91.259	82.41	110.48	66.76	88.064	94.826	86.626	67.621	86.912	86.766	85.547	79.172	89.425	90	95.134	92.6	91.625	90.168	92.385	77.473	89.477	89.089	88.998	88.349	89.1	90
	89.95	87.551	86.189	86.856	93.557	78.917	92.886	90.828	91.035	74.922	69.778	89.404	89.389	86.117	80.651	85.903	89.747	87.56	81.706	86.137	90.63	97.435	78.156	91.259	92.711	85.652	86.195	88.064	94.826	86.626	67.621	86.912	86.766	85.547	79.172	89.425	90	95.134	92.6	75.767	90.168	92.385	77.473	89.477	89.089	88.998	88.349	89.1	90
	89.95	87.551	86.189	86.856	93.557	78.917	92.886	90.828	91.035	74.922	69.778	89.404	89.389	86.117	65.413	85.903	89.747	87.56	81.706	86.137	90.63	97.435	77.421	91.259	92.711	85.652	86.195	88.064	94.826	86.626	67.621	86.912	86.766	85.547	79.172	89.425	90	95.134	92.6	75.767	90.168	92.385	77.473	89.477	89.089	88.998	88.349	89.1	90
	89.95	87.551	86.189	86.856	93.557	78.917	92.886	90.828	91.035	74.922	69.778	89.404	89.389	86.117	65.413	85.903	89.747	87.56	81.706	86.137	90.63	97.435	77.421	91.259	92.711	85.652	72.908	88.064	88.121	86.626	67.621	86.912	86.766	85.547	79.172	89.425	90	91.777	92.6	75.767	90.168	92.385	77.473	89.477	89.089	88.998	88.349	89.1	90
	89.95	87.551	86.189	86.856	93.557	78.917	92.886	90.828	91.035	76.748	69.778	89.404	89.389	86.117	65.413	85.903	89.747	87.56	81.706	86.137	86.838	97.435	77.421	91.259	92.711	85.652	72.908	88.064	88.121	86.626	67.621	86.912	86.766	85.547	79.172	89.425	90	91.777	92.6	75.767	90.168	92.385	77.473	89.477	89.089	88.998	88.349	89.1	90
	89.95	87.551	86.189	86.856	93.557	78.917	92.886	98.807	91.035	76.748	69.778	89.404	89.389	86.117	65.413	85.903	89.747	87.56	81.706	85.336	86.838	97.435	77.421	91.259	92.711	85.652	72.908	88.064	96.729	86.626	67.621	86.912	86.766	85.547	79.172	85.607	90	91.777	92.6	87.617	90.168	84.726	77.473	89.477	89.089	88.998	88.349	89.1	90
	89.95	87.551	86.189	86.856	99.378	78.917	92.886	98.807	91.035	76.748	69.778	88.901	89.389	86.117	65.413	85.903	89.747	87.56	81.706	85.336	86.838	97.435	76.989	91.259	92.711	85.652	82.75	88.064	96.729	86.626	67.621	86.912	86.766	85.547	79.172	85.607	90	91.777	92.6	87.617	90.168	84.726	77.473	89.477	89.089	88.998	88.349	89.1	90
	89.95	87.551	86.189	86.856	99.378	78.917	92.886	98.807	91.035	76.748	69.778	88.901	89.389	86.117	65.413	85.903	89.747	87.56	81.706	85.336	86.838	89.902	76.989	91.259	92.711	92.493	82.75	88.064	96.729	86.626	67.621	86.912	86.766	85.547	79.172	85.607	90	91.777	92.6	87.617	90.168	84.726	77.473	89.477	89.089	88.998	88.349	89.1	90
	89.95	87.551	86.189	86.856	99.378	78.917	92.886	84.918	91.035	76.748	69.778	88.901	89.389	86.117	80.303	85.903	89.747	87.56	81.706	85.336	86.838	89.902	76.989	91.259	96.064	92.493	82.75	88.064	96.729	86.626	67.621	86.912	86.766	85.547	79.172	85.607	90	91.777	92.6	87.617	90.168	84.726	77.473	89.477	89.089	88.998	88.349	89.1	90
	89.95	87.551	86.189	96.297	99.378	78.917	92.886	84.918	91.035	76.748	69.778	88.901	89.389	86.117	80.303	85.903	89.747	87.56	81.706	85.336	86.838	89.902	76.989	91.259	96.064	92.493	82.75	88.064	96.729	86.626	67.621	86.912	86.766	86.574	79.172	93.668	90	91.777	92.6	87.617	90.168	84.726	77.473	89.477	89.089	88.998	88.349	89.1	90
	89.95	92.507	86.189	96.297	99.378	78.917	92.886	84.918	91.035	76.748	69.778	88.901	89.389	86.117	66.629	85.903	89.747	87.56	81.706	91.711	86.838	89.902	76.989	91.259	96.064	92.493	82.75	88.064	96.729	86.626	67.621	86.912	86.766	86.574	79.172	93.668	90	91.777	92.6	87.617	90.168	84.726	77.473	89.477	89.089	88.998	88.349	89.1	90
	89.95	92.507	86.189	96.297	99.378	78.917	92.886	84.918	91.035	76.748	69.778	88.901	89.389	86.117	66.629	85.903	89.747	87.56	81.706	91.711	86.838	89.902	76.989	91.259	96.064	92.523	82.75	88.064	86.44	86.626	67.621	86.166	96.138	86.574	79.172	93.668	90	91.777	92.6	87.617	90.168	84.726	77.473	89.477	89.089	88.998	88.349	89.1	90
	89.95	92.507	86.189	96.297	74.514	78.917	92.886	84.918	91.035	76.748	69.778	88.901	89.389	86.117	77.697	85.903	89.747	87.56	81.706	91.711	86.838	89.902	76.989	91.259	96.064	92.523	82.75	88.064	86.44	86.626	67.621	86.166	96.138	86.574	77.263	93.668	90	91.777	92.6	87.617	90.168	84.726	77.473	89.477	89.089	88.998	88.349	89.1	90
	89.95	92.507	86.189	78.708	74.514	78.917	92.886	84.918	91.035	76.748	69.778	88.901	89.389	86.117	77.697	85.903	89.747	87.56	81.706	91.711	86.838	89.902	76.989	91.259	90.152	92.523	82.75	88.064	86.44	86.626	67.621	86.166	96.138	86.574	77.263	93.668	90	91.777	92.6	87.617	90.168	84.726	77.473	89.477	89.089	88.998	88.349	89.1	90
	89.95	92.507	86.189	78.708	74.514	78.917	92.886	93.319	91.035	76.748	69.778	88.901	89.389	86.117	77.697	85.903	89.747	87.56	81.706	91.711	86.838	89.902	76.989	91.259	90.152	92.523	82.75	88.064	89.186	86.626	67.621	96.505	96.138	87.271	77.263	93.668	90	91.777	92.6	87.617	90.168	84.726	77.473	89.477	89.089	88.671	88.349	89.1	90
	89.95	92.507	86.189	78.708	86.862	78.917	92.886	93.319	91.035	76.748	69.778	88.901	89.389	86.117	77.697	85.903	89.747	87.56	81.706	91.711	86.838	89.902	76.989	87.161	90.152	92.523	82.75	88.064	89.186	86.626	67.621	96.505	96.138	95.843	77.263	93.668	90	91.777	92.6	87.617	90.168	84.726	77.473	89.477	94.192	88.671	88.349	89.1	90
	89.95	92.507	86.189	78.708	86.862	78.917	92.886	93.319	91.035	76.748	69.778	88.901	89.389	86.117	77.697	85.903	89.747	87.56	81.706	91.711	86.838	89.902	76.989	87.161	90.152	92.523	82.75	88.064	89.186	86.626	67.621	96.505	96.138	95.843	77.263	93.668	90	91.777	92.6	88.585	90.168	84.726	77.473	89.477	94.192	88.671	88.349	89.1	90
	89.95	92.507	86.189	78.708	76.581	78.917	92.886	93.319	91.035	76.748	69.778	88.901	89.389	86.117	77.697	85.903	89.747	87.56	81.706	91.711	86.838	89.902	76.989	87.161	90.152	92.523	82.75	88.064	88.924	86.626	67.621	96.505	96.138	95.843	77.263	93.668	90	91.777	92.6	88.585	90.168	84.726	77.473	89.477	94.192	88.671	88.349	89.1	90
	89.95	92.507	86.189	82.558	76.581	78.917	92.886	93.319	91.035	76.748	69.778	88.901	89.389	86.117	77.697	85.903	89.747	87.56	81.706	91.711	86.838	89.902	76.989	87.161	89.432	92.523	82.75	88.064	88.924	86.626	67.621	96.505	96.138	95.843	77.263	93.668	90	91.777	92.6	88.585	90.168	84.726	77.473	89.477	94.192	88.671	88.349	89.1	90
	89.95	92.507	86.189	82.558	93.535	78.917	92.886	93.319	91.035	76.748	69.778	88.901	89.389	86.117	77.697	85.903	89.747	87.56	81.706	91.711	86.838	89.902	76.989	87.161	89.432	92.523	82.75	88.064	88.924	86.626	67.621	96.505	88.544	95.843	83.837	93.668	90	91.777	92.6	88.585	90.168	84.726	77.473	89.477	94.192	88.671	88.349	89.1	90
	89.95	124.203	86.189	82.558	93.535	78.917	92.886	93.319	91.035	76.748	69.778	88.901	89.389	86.117	77.697	85.903	89.747	87.56	81.706	91.711	86.838	89.902	76.989	87.161	89.432	92.523	82.75	88.064	88.924	57.134	67.621	96.505	88.544	95.843	83.837	93.668	90	84.419	92.6	88.585	90.168	84.726	77.473	89.477	94.192	88.671	88.349	89.1	90
	89.95	124.203	86.189	93.564	93.535	78.917	92.886	93.319	91.035	76.748	69.778	88.901	89.389	86.117	77.697	85.903	89.747	87.56	81.706	91.711	86.838	89.902	76.989	87.161	89.432	92.523	82.75	88.064	88.924	57.134	67.621	96.505	88.544	95.843	83.837	87.511	90	84.419	92.6	88.585	90.168	84.726	77.473	89.477	94.192	88.671	88.349	89.1	90
	89.95	124.203	86.189	93.564	93.535	78.917	92.886	93.319	91.035	76.748	69.778	88.901	89.389	86.117	77.697	85.903	89.747	87.56	81.706	91.711	86.838	89.902	76.989	87.161	89.432	92.523	82.75	88.064	88.924	57.134	67.621	96.505	88.544	95.843	83.837	87.511	90	84.419	92.6	88.585	90.168	84.726	77.473	89.477	94.192	88.671	88.349	89.1	90
	89.95	124.203	86.189	93.564	89.095	78.917	89.039	93.319	91.035	76.748	69.778	88.901	89.389	86.117	77.697	85.903	89.747	87.56	81.706	91.711	86.838	89.902	76.989	87.161	89.432	92.523	82.75	88.064	88.924	57.134	67.621	96.505	88.544	95.843	83.837	87.511	90	84.419	92.6	88.585	90.168	84.726	77.473	89.477	94.192	88.671	88.349	89.1	90
	89.95	88.271	86.189	93.564	89.095	78.917	89.039	85.835	91.035	76.748	69.778	88.901	89.389	86.117	77.697	85.903	89.747	87.56	81.706	91.711	86.838	89.902	76.989	87.161	89.432	85.319	82.75	88.064	88.924	57.134	67.621	96.505	93.183	95.843	83.837	94.916	90	84.419	92.6	88.585	90.168	84.726	77.473	89.477	90.66	88.671	88.349	89.1	90
	89.95	88.271	86.189	93.564	89.095	78.917	89.039	85.835	91.035	76.748	69.778	88.901	89.389	86.117	77.697	85.903	89.747	87.56	81.706	91.711	86.838	89.902	76.989	87.161	89.432	85.319	82.75	88.064	94.987	57.134	67.621	96.505	93.183	95.843	83.837	94.916	90	84.419	92.6	88.585	90.168	84.726	77.473	89.477	90.66	88.671	88.349	89.1	90
	89.95	88.271	86.189	93.564	89.095	78.917	89.039	85.835	91.035	76.748	69.778	88.901	89.389	86.117	77.697	85.903	89.747	87.56	81.706	91.711	86.838	89.902	65.542	87.161	89.432	85.319	82.75	88.064	94.987	57.134	67.621	96.505	93.183	95.843	83.837	91.418	90	84.419	92.6	88.585	90.168	84.726	77.473	89.477	90.66	88.671	88.349	89.1	90
	89.95	88.271	86.189	93.564	94.694	78.917	89.039	85.835	91.035	76.748	69.778	88.901	89.389	86.117	77.697	85.903	89.747	87.56	81.706	91.711	86.838	89.902	65.542	87.161	88.144	85.319	82.75	88.064	94.987	57.134	67.621	96.505	93.183	95.843	83.837	91.418	90	84.419	92.6	88.585	90.168	102.077	77.473	89.477	90.66	88.671	88.349	89.1	90
	89.95	88.271	86.189	93.564	89.131	78.917	89.039	85.835	91.035	76.748	69.778	88.901	89.389	86.117	77.697	85.903	89.747	87.56	81.706	91.711	86.838	89.902	65.542	87.161	88.144	85.319	82.75	88.064	94.987	57.134	67.621	96.505	93.183	93.17	83.837	91.418	90	84.419	92.6	88.585	90.168	102.077	77.473	89.477	90.66	88.671	88.349	89.1	90
	89.95	88.271	86.189	93.564	89.131	78.917	89.039	81.33	91.035	76.748	69.778	88.901	89.389	86.117	77.697	85.903	89.747	87.56	81.706	91.711	86.838	89.902	65.542	87.161	88.144	85.319	82.75	88.064	94.987	57.134	67.621	96.505	87.17	93.17	77.149	88.985	90	84.419	92.6	88.585	90.168	102.077	77.473	89.477	90.66	88.671	88.349	89.1	90
	89.95	88.271	86.189	93.564	89.131	78.917	89.039	81.33	91.035	76.748	69.778	88.901	89.389	86.117	77.697	85.903	89.747	89.059	81.706	91.711	86.838	110.102	65.542	87.161	88.144	85.319	82.75	88.064	83.057	57.134	67.621	96.505	87.17	93.17	77.149	88.985	90	84.419	92.6	88.585	90.168	102.077	77.473	89.477	90.66	88.671	88.349	89.1	90
	89.95	88.271	86.189	93.564	89.131	78.917	89.039	81.33	91.035	76.748	69.778	88.901	89.389	86.117	77.697	85.903	89.747	89.059	81.706	91.711	86.838	110.102	65.542	87.161	98.279	85.319	82.75	88.064	83.057	63.244	67.621	96.505	87.17	93.17	72.728	88.985	90	84.419	92.6	88.585	90.168	91.292	77.473	89.477	90.66	88.671	88.349	89.1	90
	89.95	88.271	86.189	93.564	89.131	78.917	89.039	103.677	91.035	76.748	69.778	88.901	89.389	86.117	77.697	85.903	89.747	84.114	81.706	91.711	86.838	110.102	65.542	87.161	98.279	85.319	82.75	88.064	81.267	63.244	67.621	96.505	87.17	93.17	72.728	88.985	90	75.407	92.6	88.585	90.168	91.292	77.473	89.477	90.66	88.671	88.349	89.1	90
	89.95	88.271	86.189	93.564	89.131	78.917	89.039	90	91.035	76.748	69.778	88.901	89.389	86.117	77.697	85.903	89.747	84.114	81.706	91.711	86.838	110.102	65.542	87.161	98.279	85.319	82.75	88.064	81.267	63.244	67.621	96.505	93.549	93.17	72.728	88.985	90	75.407	92.6	88.585	90.168	91.292	77.473	89.477	90.66	88.671	88.349	89.1	90
	89.95	88.271	86.189	93.564	89.131	78.917	89.039	90	91.035	76.748	69.778	88.901	89.389	86.117	77.697	85.903	89.747	84.114	81.706	91.711	86.838	110.102	65.542	87.161	92.021	85.319	82.75	85.671	81.267	63.244	67.621	96.505	93.549	93.17	72.728	88.985	90	75.407	92.6	88.585	90.168	91.292	80.392	89.477	90.66	88.671	88.349	89.1	90
	89.95	88.271	86.189	93.564	89.131	78.917	89.039	90	91.035	76.748	69.778	88.901	89.389	86.117	77.697	85.903	89.747	84.114	81.706	91.711	86.838	110.102	65.542	87.161	92.021	85.319	82.75	85.671	81.267	63.244	67.621	95.047	93.88	93.17	72.728	88.985	90	75.407	92.6	88.585	90.168	91.292	80.392	89.477	90.66	88.671	88.349	89.1	90
	89.95	88.271	86.189	93.564	89.131	78.917	89.039	90	91.035	76.748	69.778	88.901	89.389	86.117	77.697	85.903	89.747	84.114	81.706	91.711	86.838	110.102	73.201	87.161	92.021	86.116	82.75	85.671	81.267	63.244	55.345	95.047	93.88	89.926	71.861	88.985	90	75.407	92.6	88.585	90.168	91.292	80.392	89.477	90.66	88.671	88.349	89.1	90
	89.95	88.271	86.189	93.564	89.131	78.917	89.039	90	91.035	76.748	69.778	88.901	89.389	86.117	77.697	85.903	89.747	84.114	81.706	91.711	86.838	97.488	73.201	87.161	88.644	86.116	82.75	85.671	93.382	63.244	81.29	95.047	93.88	89.926	71.861	88.985	90	75.407	92.6	88.585	90.168	91.292	80.392	89.477	90.66	88.671	88.349	89.1	90
	89.95	88.271	86.189	93.564	85.399	78.917	89.039	90	91.035	76.748	69.778	88.901	89.389	86.117	77.697	85.903	89.747	84.114	81.706	91.711	86.838	97.488	78.052	87.161	88.644	86.116	82.75	85.671	93.382	57.984	81.29	95.047	93.88	89.926	71.861	88.985	90	75.407	92.6	88.585	90.168	91.292	80.392	89.477	90.66	88.671	88.349	89.1	90
	89.95	89.572	86.189	93.564	85.399	78.917	89.039	90	91.035	76.748	69.778	88.901	89.389	86.117	77.697	85.903	89.747	84.114	81.706	91.711	86.838	97.488	78.052	87.161	88.644	86.116	82.75	85.671	93.382	57.984	68.926	95.047	93.88	89.926	71.861	88.985	90	75.407	92.6	88.585	90.168	91.292	80.392	89.477	90.66	88.671	88.349	89.1	90
	89.95	89.572	86.189	93.564	85.399	78.917	89.039	87.661	91.035	76.748	69.778	88.901	89.389	86.117	77.697	85.903	89.747	84.114	81.706	91.711	92.724	97.488	78.052	87.161	88.644	86.116	82.75	85.671	93.382	57.984	68.926	95.047	93.88	89.926	71.861	88.985	90	75.407	92.6	88.585	90.168	91.292	80.392	89.477	90.66	88.671	88.349	89.1	90
	89.95	89.572	86.189	93.564	97.783	78.917	89.039	87.661	84.758	76.748	69.778	88.901	89.389	86.117	77.697	85.903	89.747	84.114	81.706	91.711	92.724	97.488	78.052	87.161	88.644	86.116	82.75	85.671	93.382	57.984	68.926	95.047	93.88	89.926	81.239	88.985	90	75.407	92.6	88.585	90.168	91.292	80.392	89.477	90.66	88.671	88.349	89.1	90
	89.95	89.572	86.189	93.564	97.783	78.917	89.039	87.661	84.758	76.748	69.778	88.901	89.389	86.117	77.697	85.903	89.747	88.538	81.706	76.184	103.611	97.488	78.052	87.161	88.644	86.116	82.75	85.671	93.382	57.984	67.33	95.047	93.88	89.926	81.239	88.985	90	75.407	92.6	88.585	90.168	91.292	80.392	89.477	90.66	88.671	88.349	89.1	90
	89.95	89.572	86.189	90.539	91.212	78.917	89.039	87.661	84.758	76.748	69.778	88.901	89.389	86.117	77.697	85.903	89.747	88.538	81.706	76.184	103.611	91.379	78.052	87.161	88.644	86.116	82.75	85.671	93.382	57.984	67.33	95.047	93.88	89.926	81.239	88.985	90	75.407	92.6	88.585	90.168	91.292	80.392	89.477	90.66	88.671	78.667	89.1	90
	89.95	89.572	86.189	90.539	91.212	78.917	89.039	92.339	80.863	76.748	69.778	88.901	89.389	86.117	77.697	85.903	89.747	88.538	81.706	76.184	103.611	91.379	78.052	94.732	88.644	86.116	82.75	85.671	93.382	57.984	77.981	95.047	93.88	89.926	81.239	88.985	90	75.407	92.6	88.585	90.168	91.292	80.392	89.477	90.66	88.671	78.667	89.1	90
	89.138	89.572	86.189	90.539	91.212	78.917	89.039	92.339	80.863	76.748	64.64	88.901	89.389	86.117	77.697	85.903	89.747	88.538	81.706	76.184	103.611	91.379	78.052	129.329	88.644	86.116	82.75	85.671	93.382	57.984	77.981	95.047	93.88	89.926	81.239	88.985	90	75.407	92.6	88.585	90.168	91.292	80.392	89.477	90.66	88.671	78.667	89.1	90
	89.138	89.572	86.189	94.651	92.103	78.917	89.039	92.339	80.863	76.748	64.64	88.901	89.389	86.117	77.697	85.903	89.747	88.538	81.706	87.71	103.611	91.379	78.052	129.329	88.644	86.116	82.75	85.671	93.382	57.984	87.696	95.373	93.88	93.686	81.239	88.985	90	75.407	92.6	88.585	90.168	91.292	80.392	89.477	88.648	88.671	78.667	89.1	90
	89.138	89.572	86.189	94.651	92.103	78.917	89.039	92.339	80.863	76.748	64.64	88.901	89.389	86.117	77.697	85.903	89.747	88.538	81.706	87.71	103.611	91.379	78.052	129.329	88.644	86.116	82.75	85.671	93.382	57.984	87.696	95.373	93.88	93.686	81.239	88.985	90	85.332	92.6	88.585	90.168	91.292	80.392	89.477	88.648	88.671	78.667	89.1	90
	89.138	89.572	86.189	94.651	92.103	78.917	89.039	80.486	80.863	76.748	64.64	88.901	89.389	86.117	77.697	85.903	89.747	88.538	81.706	87.71	103.611	91.379	78.052	90	88.644	84.116	82.75	85.671	93.382	58.024	87.696	95.373	93.88	93.686	81.239	88.985	90	85.332	92.6	88.585	90.168	91.292	80.392	89.477	88.648	88.671	78.667	89.1	90
	89.138	89.572	86.189	94.651	92.103	78.917	89.039	80.486	80.863	76.748	64.64	88.901	89.389	86.117	77.697	85.903	89.747	86.92	81.706	90	103.611	91.379	78.052	90	88.644	84.116	82.75	96.922	93.382	58.024	87.696	95.373	93.88	93.686	81.239	88.985	90	85.332	92.6	88.585	90.168	91.292	80.392	89.477	88.648	88.671	78.667	89.1	90
	89.138	89.572	86.189	94.651	92.103	78.917	89.039	80.486	80.863	84.919	64.64	88.901	89.389	86.117	77.697	85.903	89.747	86.92	81.706	90	103.611	91.379	78.052	90	89.297	87.748	82.75	96.922	93.382	58.024	87.696	84.627	93.88	93.686	81.239	88.985	90	85.332	92.6	88.585	90.168	91.292	80.392	89.477	88.648	88.671	78.667	89.1	90
	89.138	89.572	86.189	87.125	92.103	78.917	89.039	80.486	80.863	84.919	64.64	88.901	89.389	86.117	77.697	85.903	89.747	86.92	81.706	90	103.611	91.379	78.052	90	89.297	87.748	82.75	96.922	93.382	58.024	82.529	84.627	93.88	93.686	81.239	88.985	90	85.332	92.6	88.585	90.168	91.292	80.392	89.477	88.648	88.671	78.667	89.1	90
	89.138	89.572	86.189	87.125	92.103	78.917	89.039	80.486	80.863	90.411	64.64	88.901	89.389	86.117	77.697	85.903	89.747	86.92	81.706	90	103.611	91.379	78.052	90	93.626	87.748	82.75	96.922	93.382	58.024	82.529	84.627	93.88	93.686	81.239	88.985	90	82.107	92.6	88.585	90.168	91.292	80.392	89.477	88.648	88.671	78.667	89.1	90
	89.138	89.572	86.189	87.125	90	78.917	89.039	80.486	80.863	90.411	64.64	88.901	89.389	86.117	77.697	85.903	89.747	86.92	81.706	90	103.611	91.379	74.849	90	93.626	87.748	82.75	96.922	93.382	58.024	82.529	84.627	93.88	91.122	81.239	88.985	90	82.107	92.6	88.585	90.168	91.292	80.392	89.477	88.648	88.671	78.667	89.1	90
	89.138	89.572	86.189	85.941	90	78.917	89.039	103.19	80.863	90.411	64.64	88.901	89.389	86.117	77.697	85.903	89.747	86.92	81.706	90	103.611	91.379	74.849	90	93.626	87.748	82.75	96.922	93.382	58.024	82.529	91.667	87.29	91.122	81.239	91.629	90	82.107	92.6	88.585	90.168	91.292	80.392	89.477	88.648	88.671	78.667	89.1	90
	89.138	89.572	86.189	85.941	90	78.917	89.039	103.19	80.863	96.002	64.64	88.901	89.389	86.117	77.697	85.903	89.747	86.92	81.706	90	103.611	91.379	74.849	90	96.209	87.748	82.75	96.922	93.382	58.024	82.529	91.667	87.29	91.122	81.239	91.629	90	82.107	92.6	88.585	90.168	91.292	80.392	89.477	88.648	88.671	78.667	89.1	90
	89.138	89.572	86.189	85.941	90	78.917	89.039	103.19	80.863	96.002	64.64	88.901	89.389	86.117	77.697	85.903	89.747	86.92	81.706	96.573	103.611	91.379	74.849	90	96.209	87.748	82.75	96.922	93.382	58.024	82.529	91.667	87.29	91.122	83.862	91.629	90	82.107	92.6	88.585	90.168	91.292	80.392	89.477	88.648	88.671	78.667	89.1	90
	89.138	89.572	86.189	85.941	90	78.917	89.039	92.2	90	96.002	64.64	88.901	89.389	86.117	77.697	85.903	89.747	86.92	81.706	96.573	103.611	91.379	74.849	89.179	96.209	87.748	82.75	96.922	93.382	58.024	82.529	91.667	87.29	91.122	83.862	91.629	90	82.107	92.6	88.585	90.168	91.292	80.392	89.477	88.648	88.671	78.667	89.1	90
	89.138	89.572	86.189	87.388	90	78.917	89.039	92.2	90	97.776	64.64	88.901	89.389	86.117	77.697	85.903	89.747	86.92	81.706	96.573	103.611	91.379	73.426	89.179	96.209	87.748	82.75	96.922	93.382	58.024	82.529	89.183	87.29	90.927	83.862	91.629	90	82.107	92.6	88.585	90.168	91.292	80.392	89.477	88.648	88.671	78.667	89.1	90
	89.138	89.572	86.189	87.388	90	78.917	89.039	92.2	90	97.776	64.64	88.901	89.389	86.117	77.697	85.903	89.747	86.92	81.706	96.573	103.611	91.379	73.426	89.179	96.209	87.748	82.75	96.922	88.18	58.024	82.529	89.183	87.29	90.927	83.862	91.629	90	84.69	92.6	88.585	90.168	91.292	80.392	89.477	88.648	88.646	78.667	89.1	90
	89.138	89.572	86.189	87.388	90	78.917	89.039	92.2	90	97.776	64.64	88.901	89.389	86.117	77.697	85.903	89.747	86.92	81.706	90.445	94.111	91.379	73.426	89.179	70.498	87.748	82.75	96.922	88.18	58.024	85.744	89.183	87.29	90.927	83.862	87.678	90	84.69	92.6	88.585	90.168	91.292	80.392	89.477	88.648	88.646	78.667	89.1	90
	89.138	89.572	86.189	87.388	90	89.392	89.039	92.2	90	97.776	64.64	88.901	89.389	86.117	77.697	85.903	89.747	86.92	81.706	90.445	94.111	91.379	73.426	89.179	70.498	87.748	82.75	96.922	88.18	58.024	85.744	89.183	87.29	90.927	74.664	87.678	90	84.69	92.6	88.585	90.168	91.292	80.392	89.477	88.648	88.646	78.667	89.1	90
	89.138	89.572	86.189	87.388	90	89.392	89.039	92.2	90	97.776	64.64	88.901	89.389	86.117	77.697	85.903	89.747	87.587	81.706	90.445	94.111	91.379	73.533	89.179	70.498	87.748	82.75	96.922	88.18	58.024	85.744	89.183	87.29	90.927	74.664	87.678	90	84.69	92.6	88.585	90.168	91.292	80.392	89.477	88.648	88.646	78.667	89.1	90
	89.138	89.572	86.189	87.388	103.529	89.392	89.039	92.2	90	97.776	64.64	88.901	89.389	86.117	77.697	85.903	89.747	87.587	81.706	90.445	94.111	91.379	73.533	89.179	70.498	87.748	82.75	96.922	88.18	58.024	85.744	88.709	87.29	90.927	74.664	87.678	90	84.69	92.6	88.585	90.168	91.292	80.392	89.477	88.648	88.646	78.667	89.1	90
	89.138	89.572	86.189	87.388	103.529	89.392	89.039	92.2	90	97.776	64.64	88.901	89.818	86.117	77.697	85.903	89.747	87.587	81.706	90.445	94.111	91.379	73.533	89.179	70.498	87.748	82.75	96.922	88.18	58.024	85.744	88.709	87.29	90.927	74.664	87.678	90	84.69	92.6	88.585	90.168	91.292	80.392	89.477	88.648	88.646	78.667	89.1	90
	89.138	89.572	86.189	92.037	103.529	89.392	89.039	90	90	97.776	64.64	88.901	89.818	86.117	77.697	85.903	89.747	87.587	81.706	81.416	80.874	91.379	74.046	99.819	70.498	87.748	82.75	96.922	88.18	58.024	85.744	98.256	87.29	90.927	74.664	87.678	90	84.69	92.6	88.585	90.168	91.292	80.392	89.477	88.648	88.646	81.098	89.1	90
	89.138	89.572	86.189	92.037	103.529	89.392	94.84	90	96.989	97.776	64.64	88.901	89.818	86.117	77.697	85.903	89.747	87.587	81.706	81.416	80.874	91.379	74.046	99.819	70.498	87.748	82.75	96.922	88.18	58.024	85.744	98.256	87.29	90.927	74.664	87.678	90	84.69	92.6	88.585	90.168	91.292	80.392	89.477	88.648	88.646	81.098	89.1	90
	89.138	89.572	86.189	92.037	93.762	89.392	94.84	90	96.989	97.776	64.64	88.901	89.818	86.117	77.697	85.903	89.747	87.587	81.706	94.733	80.874	91.379	74.046	99.819	106.696	87.748	82.75	96.922	88.18	58.024	64.684	98.256	87.29	99.274	74.664	84.855	90	84.69	92.6	88.585	90.168	91.292	80.392	89.477	88.648	88.646	81.098	89.1	90
	89.138	89.572	86.189	88.984	93.762	89.392	90.091	90	96.989	97.776	64.64	88.901	89.818	86.117	77.697	85.903	89.747	88.89	81.706	94.733	80.874	91.379	74.046	89.65	106.696	87.748	82.75	96.922	88.18	58.024	64.684	98.256	87.29	99.274	81.448	84.855	90	84.69	92.6	88.585	90.168	91.292	80.392	89.477	88.648	88.646	81.098	88.458	90
	89.138	89.572	86.189	88.984	93.762	89.392	90.091	90	96.989	97.776	64.64	88.901	89.818	86.117	77.697	85.903	89.747	88.89	81.706	94.733	80.874	91.379	74.046	89.65	106.696	87.748	82.75	96.922	88.18	58.024	64.684	98.256	87.29	99.274	81.448	84.855	88.44	84.69	92.6	88.585	90.168	91.292	80.392	89.477	88.648	88.646	81.098	88.458	90
	89.138	89.572	86.189	86.679	93.762	89.392	90.091	82.625	96.989	97.776	64.64	88.901	89.818	86.117	77.697	85.903	89.747	88.89	81.706	94.733	80.874	91.379	74.046	89.65	106.696	87.748	82.75	96.922	79.551	58.024	71.499	98.256	87.29	99.274	81.448	84.855	88.44	84.69	92.6	88.585	90.168	91.292	80.392	89.477	88.648	88.646	81.098	88.458	90
	89.138	89.572	86.189	90.094	93.762	89.392	90.091	82.625	96.989	97.776	64.64	88.901	89.818	86.117	77.697	85.903	89.747	88.89	81.706	94.733	80.874	91.379	74.046	89.65	106.696	87.748	82.75	96.922	79.551	58.024	71.499	98.256	87.29	99.274	74.116	84.855	88.44	84.69	92.6	88.585	90.168	91.292	80.392	89.477	88.648	88.646	81.098	88.458	90
	89.138	89.572	86.189	90.094	93.762	89.392	90.091	88.098	96.989	97.776	64.64	88.901	89.818	86.117	77.697	85.903	89.747	88.89	81.706	80.581	80.874	91.379	74.046	89.238	93.246	87.748	82.75	96.922	79.551	58.024	47.828	98.256	87.29	99.274	74.116	84.855	88.44	84.69	92.6	88.585	90.168	91.292	80.392	89.477	88.648	88.646	81.098	88.458	90
	89.138	89.572	86.189	90.094	93.762	89.392	90.091	88.098	96.989	97.776	64.64	88.901	89.818	86.117	77.697	85.903	89.747	88.89	81.706	80.581	80.874	91.379	74.046	89.238	93.246	87.748	82.75	96.922	79.551	58.024	47.828	96.196	87.29	99.274	74.116	84.855	88.44	84.69	92.6	88.585	90.168	91.292	80.392	89.477	88.648	88.646	63.416	88.458	90
	89.138	89.572	86.189	90.094	93.762	100.664	90.091	88.098	96.989	97.776	64.64	88.901	89.818	86.117	77.697	85.903	89.747	88.89	81.706	80.581	80.874	91.379	74.046	89.238	93.246	87.748	82.75	96.922	79.551	58.024	47.828	96.196	87.29	99.274	74.116	84.855	88.44	79.948	92.6	88.585	90.168	91.292	80.392	89.477	88.648	88.646	63.416	88.458	90
	89.138	89.572	86.189	109.321	93.762	100.664	90.091	88.098	96.989	97.776	64.64	88.901	89.818	86.117	77.697	85.903	89.747	91.007	81.706	81.977	80.874	91.379	74.046	89.238	87.052	87.748	82.75	96.922	79.551	58.024	47.828	96.196	87.29	99.274	74.116	84.855	88.44	79.948	92.6	88.585	90.168	91.292	80.392	89.477	88.648	89.874	63.416	88.458	90
	89.138	89.572	86.189	109.321	93.762	100.664	90.091	88.098	96.989	97.776	64.64	88.901	89.818	86.117	77.697	85.903	89.747	91.007	81.706	81.977	80.874	91.379	74.046	89.238	87.052	87.748	82.75	92.478	79.551	58.024	80.21	96.196	87.29	99.274	74.116	90.875	88.44	84.872	92.6	88.585	90.168	91.292	80.392	89.477	88.648	89.874	63.416	88.458	90
	89.138	89.572	86.189	109.321	93.762	100.664	88.678	88.098	96.989	97.776	64.64	88.901	89.818	86.117	77.697	85.903	89.747	91.007	81.706	81.977	80.874	91.379	74.046	89.238	87.052	87.748	82.75	92.478	79.551	58.024	80.21	96.196	87.29	99.274	74.116	90.875	88.44	84.872	92.6	88.585	90.168	91.292	80.392	89.477	88.648	89.874	63.416	88.458	90
	89.138	89.572	86.189	109.321	87.679	71.259	88.678	93.449	96.989	97.776	64.64	88.901	89.818	86.117	77.697	85.903	89.747	91.007	81.706	91.263	80.874	91.379	74.046	89.238	87.052	87.748	82.75	92.478	79.551	58.024	80.21	96.196	87.29	99.274	74.116	90.875	88.44	84.872	92.6	88.585	90.168	91.292	80.392	89.477	88.648	89.874	63.416	88.458	90
	89.138	89.572	86.189	109.321	87.679	71.259	88.678	93.449	96.989	97.776	64.64	88.901	89.818	86.117	77.697	85.903	89.747	91.007	81.706	91.263	80.874	91.379	74.046	89.238	87.052	87.748	82.75	92.478	90.609	58.024	80.21	96.196	87.29	99.274	74.116	90.875	88.44	77.261	92.6	88.585	90.168	91.292	80.392	89.477	88.648	89.874	63.416	88.458	90
	89.138	89.572	86.189	109.321	87.679	71.259	88.678	97.437	96.989	97.776	71.669	88.901	89.818	86.117	77.697	85.903	89.747	91.007	81.706	91.263	80.874	91.379	74.046	89.238	87.052	87.748	82.75	92.478	90.609	58.024	80.21	96.196	87.29	99.274	74.116	90.875	88.44	77.261	92.6	88.585	90.168	91.292	80.392	89.477	88.648	89.874	63.416	88.458	90
	89.138	89.572	86.189	109.321	87.679	75.024	88.678	97.437	96.989	97.776	71.669	88.901	89.818	86.117	77.697	85.903	89.747	91.007	81.706	91.263	80.874	91.379	74.046	89.238	87.052	87.748	82.75	92.478	118.282	58.024	80.21	90.827	87.29	99.274	74.116	90.875	88.44	77.55	92.6	88.585	90.168	91.292	80.392	89.477	88.648	89.874	58.619	88.458	90
	89.138	89.572	86.189	91.438	87.679	75.024	88.84	97.437	96.989	97.776	71.669	88.901	89.818	86.117	77.697	85.903	89.747	91.007	81.706	91.263	80.874	91.379	74.046	89.238	87.052	77.505	82.75	92.478	118.282	58.024	83.747	90.827	87.29	99.274	74.116	90.875	88.44	77.55	92.6	88.585	85.098	91.292	80.392	89.477	88.648	89.874	58.619	88.458	90
	89.138	89.572	86.189	91.438	87.679	75.024	88.84	83.318	96.989	97.776	71.669	88.901	89.818	86.117	77.697	85.903	89.747	91.007	81.706	91.263	80.874	91.379	75.087	89.238	87.052	77.505	82.75	92.478	118.282	58.024	83.747	90.827	87.29	99.274	74.116	90.875	88.44	77.55	92.6	88.585	85.098	91.292	80.392	89.477	88.648	89.874	60.646	88.458	90
	89.138	89.572	86.189	91.438	87.679	99.034	88.84	83.318	96.989	97.776	71.669	88.901	89.818	86.117	77.697	85.903	89.747	91.007	81.706	91.263	80.874	91.379	75.087	89.238	87.052	77.505	82.75	95.265	81.854	58.024	83.747	90.827	87.29	96.655	74.116	90.875	88.44	94.69	92.6	88.585	85.098	91.292	80.392	89.477	88.648	89.874	60.646	88.458	90
	89.138	89.572	86.189	91.438	87.679	99.034	88.84	83.318	86.259	97.776	71.669	88.901	89.818	89.034	77.697	85.903	89.747	91.007	81.706	91.263	90.091	91.379	75.24	89.238	87.052	77.505	82.75	95.265	81.854	58.024	83.747	90.827	87.29	96.655	74.116	90.875	88.44	94.69	92.6	88.585	85.098	91.292	80.392	89.477	88.648	89.874	60.646	88.458	90
	89.138	89.572	86.189	86.106	87.679	99.034	88.84	83.318	86.259	97.776	71.669	98.629	89.818	89.034	77.697	85.903	89.747	91.007	81.706	91.263	90.091	91.379	75.24	89.238	87.052	77.505	82.75	95.265	81.854	58.024	83.276	90.827	87.29	96.655	74.116	90.875	88.44	94.69	92.6	88.585	85.098	91.292	80.392	89.477	88.648	89.874	60.646	88.458	90
	89.138	89.572	86.189	86.106	87.679	99.034	88.84	83.318	86.259	97.776	71.669	98.629	89.818	89.034	77.697	85.903	89.747	91.007	81.706	91.263	90.091	91.379	75.24	89.238	87.052	77.505	82.75	95.265	81.854	58.024	83.276	90.827	87.29	96.655	74.116	90.875	88.44	89.147	92.6	88.585	85.098	91.292	80.392	89.477	88.648	89.874	60.646	88.458	90
	89.138	89.572	86.189	86.106	87.679	99.034	88.84	94.215	86.259	97.776	71.669	98.629	89.818	89.034	77.697	85.903	89.747	91.007	81.706	91.263	90.091	91.379	75.24	89.238	87.052	77.505	82.75	95.265	81.854	58.024	85.25	90.827	87.29	96.655	74.116	90.875	88.44	89.147	92.6	88.585	85.098	91.292	80.392	89.477	88.648	89.874	80.842	88.458	90
	89.138	89.524	86.189	108.768	87.679	99.034	88.84	94.215	86.259	97.776	71.669	89.946	89.818	89.034	77.697	85.903	89.747	91.007	81.706	91.263	90.091	91.379	75.24	89.238	87.052	77.605	82.75	95.265	81.854	58.024	85.25	90.827	87.29	88.513	74.116	90.875	88.44	89.147	92.6	88.585	85.098	91.292	80.392	89.477	88.648	89.874	80.842	88.458	90
	89.138	89.524	86.189	108.768	87.679	77.267	88.84	102.506	86.259	97.776	71.669	89.946	89.818	89.034	77.697	85.903	89.747	91.007	81.706	91.263	90.091	91.379	75.24	89.238	87.052	77.605	82.75	95.265	81.854	58.024	85.25	90.827	87.29	88.513	74.116	90.875	88.44	89.147	92.6	88.585	85.098	91.292	80.392	89.477	88.648	89.874	80.842	94.245	90
	89.138	89.524	86.189	79.421	87.679	77.267	88.84	102.506	86.259	97.776	71.669	89.946	89.818	89.034	77.697	85.903	89.747	91.007	81.706	91.263	90.091	91.379	75.24	89.238	87.052	77.605	82.75	95.265	81.854	58.024	82.035	90.827	87.29	96.393	74.116	90.875	88.44	89.147	92.6	88.585	85.098	91.292	80.392	89.477	88.648	89.874	80.842	94.245	90
	89.138	89.524	86.189	79.421	87.679	77.267	88.84	90.004	86.259	97.776	71.669	89.946	89.818	89.034	77.697	85.903	89.747	91.007	81.706	91.263	90.091	91.379	75.24	89.238	87.052	77.605	82.75	81.865	81.854	58.024	80.245	90.827	87.29	96.393	74.116	90.875	88.44	89.147	92.6	88.585	85.098	91.292	80.392	89.477	88.648	89.874	80.842	94.245	90
	89.138	89.524	86.189	86.181	87.679	77.267	88.84	90.004	86.259	97.776	71.669	89.946	89.818	89.034	77.697	85.903	89.747	91.007	81.706	91.263	90.091	91.379	75.24	89.238	87.052	77.605	82.75	81.865	81.854	58.024	80.245	90.827	98.337	96.393	74.116	97.04	88.44	89.147	92.6	88.585	85.098	91.292	79.961	89.477	88.648	89.874	78.468	94.245	90
	89.138	89.524	86.189	86.181	87.679	77.267	88.84	90.004	86.259	97.776	71.669	89.946	89.818	89.034	77.697	85.903	84.68	91.007	81.706	91.263	90.091	91.379	75.24	89.238	87.052	77.605	82.75	81.865	81.854	58.024	80.245	90.827	98.337	107.551	74.116	97.04	88.44	89.147	92.6	88.585	84.557	91.292	79.961	89.477	88.648	89.874	78.468	94.245	90
	89.138	89.524	86.189	90.587	87.679	77.267	88.84	90.004	91.302	97.776	71.669	89.946	89.818	89.034	77.697	85.903	84.68	91.007	81.706	91.263	90.091	91.379	75.24	89.238	87.052	77.605	82.75	81.865	81.854	58.024	80.245	90.827	98.337	107.551	77.758	97.04	88.44	89.147	92.6	88.585	84.557	91.292	79.961	89.477	88.648	89.874	78.468	94.245	90
	89.138	89.524	86.189	90.587	87.679	77.267	88.84	90.004	91.302	97.776	71.669	89.946	89.818	89.034	77.697	85.903	84.68	91.007	81.706	91.263	90.091	91.379	75.24	89.238	87.052	77.605	78.501	81.865	81.854	58.024	80.245	90.827	98.337	98.296	77.758	97.04	88.44	89.147	92.6	88.585	84.557	91.292	79.961	89.477	88.648	89.874	78.468	94.245	90
	89.138	89.524	86.189	90.587	87.679	77.267	88.84	90.004	91.302	97.776	71.669	89.946	89.818	89.034	77.697	85.903	84.68	91.007	81.706	90	90.091	91.379	75.24	89.238	87.052	77.605	78.501	81.865	81.854	58.024	80.245	90.827	98.337	98.296	77.758	97.04	88.44	89.147	92.6	88.585	84.557	91.292	79.961	89.477	88.648	89.874	78.468	94.245	90
	89.138	89.524	86.189	90.587	87.679	77.267	88.84	90.004	91.302	97.776	71.669	89.946	89.818	89.034	77.697	85.903	84.68	91.007	81.706	90	90.091	91.379	75.24	89.238	87.052	77.605	78.501	81.865	91.062	58.024	80.245	90.827	98.337	82.272	77.758	97.04	88.44	89.147	92.6	88.585	84.557	91.292	79.961	89.477	106.563	89.874	78.468	92.475	90
	94.092	89.524	86.189	90.587	87.679	77.267	88.84	90.004	91.302	97.776	71.669	89.946	89.818	89.034	77.697	85.903	84.68	91.007	81.706	90	96.57	91.379	75.24	89.238	87.052	77.605	78.501	81.865	91.062	58.024	85.71	90.827	98.337	82.272	77.758	97.04	88.44	89.147	92.6	88.585	84.557	91.292	79.961	89.477	106.563	89.874	78.468	92.475	90
	94.092	89.524	86.189	90.587	87.679	77.267	88.84	90.004	91.302	97.776	71.669	89.946	89.818	89.034	77.697	85.903	84.68	91.007	81.706	86.237	96.57	91.379	75.24	91.393	87.052	77.605	78.501	81.865	91.062	58.024	85.71	90.827	98.337	82.272	77.758	87.661	88.44	89.147	92.6	88.585	87.541	91.292	79.961	89.477	106.563	89.874	73.616	92.475	90
	94.092	89.524	86.189	90.587	87.679	77.267	88.84	90.004	91.302	97.776	71.669	89.946	89.818	89.034	77.697	85.903	84.68	91.007	81.706	84.042	96.57	91.379	75.24	91.393	94.886	77.605	78.501	81.865	91.062	58.024	85.71	78.776	98.337	82.272	77.758	87.661	88.44	89.147	92.6	88.585	87.541	91.292	79.961	89.477	106.563	89.874	73.616	79.584	90
	94.092	89.524	86.189	88.32	87.679	77.267	88.84	90.004	91.302	97.776	71.669	89.946	89.818	89.034	77.697	85.903	84.68	91.007	81.706	84.042	96.57	91.379	75.24	91.393	94.886	77.605	78.501	81.865	89.661	58.024	85.71	78.776	98.337	82.272	77.758	87.661	88.44	89.147	92.6	88.585	87.541	91.292	79.961	89.477	106.563	89.874	73.616	79.584	90
	94.092	89.524	86.189	88.32	87.679	77.267	88.84	90.004	91.302	97.776	71.669	94.744	89.818	89.034	77.697	85.903	84.68	91.007	81.706	103.997	91.882	91.379	75.24	91.393	94.886	77.605	78.501	81.865	89.661	58.024	85.71	78.776	95.653	82.272	77.758	87.661	88.44	89.147	92.6	88.585	87.541	91.292	79.961	89.477	106.563	89.874	77.912	79.584	90
	94.092	89.524	86.189	88.32	87.679	77.267	88.84	88.515	91.302	97.776	71.669	94.744	89.818	89.034	77.697	85.903	84.68	91.007	81.706	103.997	91.882	91.379	75.24	91.393	94.886	77.605	78.501	81.865	89.661	58.024	85.71	78.776	95.653	82.272	77.758	87.661	88.44	89.147	92.6	88.585	87.541	91.292	79.961	89.477	106.563	89.874	77.912	79.584	90
	94.092	89.524	86.189	88.32	87.679	77.267	88.84	88.515	91.302	97.776	71.669	94.744	89.818	89.034	77.697	85.903	84.68	91.007	81.706	80.363	91.882	91.379	75.24	91.393	94.886	77.605	78.501	81.865	89.661	58.024	85.71	90.735	95.653	74.706	77.758	90.531	88.44	85.423	92.6	88.585	87.541	91.292	79.961	89.477	99.629	89.874	77.912	79.584	90
	94.092	89.524	86.189	88.32	91.838	77.267	88.84	91.5	91.302	97.776	71.669	94.744	89.818	89.034	77.697	85.903	84.68	91.007	81.706	80.363	91.882	91.379	75.24	91.393	94.886	77.605	78.501	81.865	89.661	69.357	85.71	90.735	95.653	74.706	77.758	90.531	88.44	85.423	92.6	88.585	87.541	91.292	79.961	89.477	99.629	89.874	72.975	79.584	90
	94.092	89.524	86.189	88.32	91.838	77.267	88.84	91.5	81.029	97.776	71.669	93.97	89.818	89.034	77.697	85.903	84.68	91.007	81.706	80.363	91.882	91.379	75.24	91.393	94.886	77.605	78.501	94.927	89.661	69.357	84.982	90.735	85.593	94.179	77.758	90.531	88.44	83.292	92.6	88.585	87.541	91.292	79.961	89.477	99.629	89.874	72.975	76.729	90
	87.014	80.909	86.189	88.32	91.838	77.267	88.84	91.5	81.029	97.776	71.669	93.97	89.818	89.034	77.697	85.903	84.68	91.007	81.706	85.156	91.882	90	86.805	91.393	94.886	77.605	78.501	94.927	89.661	69.357	84.982	90.735	85.593	94.179	77.758	90.531	88.44	83.292	92.6	88.585	87.541	92.862	79.961	89.477	99.629	89.874	72.975	76.729	90
	87.014	80.909	86.189	88.32	91.838	77.267	88.84	91.5	81.029	97.776	71.669	93.97	89.818	89.034	77.697	85.903	84.68	91.007	81.706	85.156	91.882	90	86.805	91.393	94.886	77.605	78.501	94.927	89.661	69.357	84.982	90.735	85.593	94.179	77.758	90.531	88.44	92.593	92.6	88.585	87.541	92.862	79.961	89.477	99.629	89.874	72.975	76.729	90
	87.014	80.909	86.189	88.32	91.838	77.267	75.507	91.5	81.029	97.776	71.669	93.97	89.818	89.034	77.697	85.903	84.68	91.007	81.706	85.156	84.476	90	86.805	91.393	98.202	77.605	78.501	94.927	89.661	69.357	84.982	90.735	85.593	94.179	77.758	90.531	88.44	92.593	92.6	88.585	87.541	92.862	79.961	89.477	99.629	89.874	72.975	76.729	90
	87.014	80.909	86.189	88.32	91.838	77.267	79.69	91.5	81.029	97.776	71.669	85.129	89.818	89.034	77.697	85.903	84.68	91.007	81.706	85.156	84.476	90	86.805	91.393	98.202	77.605	78.501	86.051	89.661	69.357	84.982	90.735	92.757	94.179	77.758	90.531	88.44	92.593	92.6	88.585	87.541	92.862	79.961	89.477	99.629	89.874	72.975	84.19	90
	81.686	80.909	86.189	88.32	91.838	77.267	79.69	91.5	81.029	97.776	65.259	85.129	89.818	89.034	67.505	85.903	84.68	91.007	81.706	85.156	84.476	90	86.805	91.393	98.202	77.605	78.501	86.051	89.661	69.357	84.982	90.735	92.757	94.179	77.758	90.531	88.44	92.593	92.6	88.585	87.541	92.862	79.961	89.477	99.629	89.874	72.975	84.19	90
	81.686	80.909	86.189	88.32	91.838	77.267	79.69	91.5	81.029	97.776	65.259	85.129	89.818	89.034	67.505	85.903	84.68	91.007	81.706	85.156	84.476	90	86.805	91.393	98.202	77.605	78.501	86.051	89.661	69.357	84.982	90.735	92.757	94.179	77.758	90.531	88.44	92.593	92.6	88.585	87.541	92.862	79.961	89.477	99.629	89.874	72.975	84.19	90
	81.686	80.909	86.189	88.32	91.838	77.267	97.163	91.5	81.029	97.776	65.259	85.129	89.818	89.034	67.505	85.903	84.68	91.007	81.706	85.156	92.068	90	86.805	91.393	90.288	77.605	78.501	86.051	89.661	69.357	84.982	90.735	92.757	94.179	77.758	90.531	88.44	92.593	92.6	88.585	87.541	92.862	79.961	89.477	99.629	89.874	72.975	84.19	90
	90.554	80.909	86.189	86.471	91.838	77.267	97.163	91.5	81.029	97.776	65.259	85.129	81.842	89.034	67.505	85.903	84.68	91.007	81.706	85.156	92.068	90	86.805	91.393	90.288	77.605	78.501	86.051	89.661	49.049	84.982	90.735	92.757	94.179	77.758	90.531	88.44	92.593	92.6	88.585	87.541	92.862	79.961	89.477	99.629	89.874	70.804	84.19	90
	90.554	80.909	86.189	86.471	91.838	77.267	91.632	91.5	81.029	97.776	65.259	85.129	81.842	89.034	67.505	85.903	84.68	91.007	81.706	99.675	92.068	90	86.805	91.393	90.288	77.605	78.501	88.93	89.661	49.049	84.982	87.12	92.757	94.179	75.526	90.531	88.44	92.593	92.6	88.585	87.541	92.862	79.961	89.477	99.629	89.874	70.804	84.19	90
	90.554	80.909	86.189	90.799	91.838	77.267	91.632	91.5	81.029	85.932	65.259	85.129	81.842	89.034	67.505	85.903	84.68	91.007	81.706	99.675	92.068	90	86.805	91.393	90.288	77.605	78.501	88.93	89.661	49.049	84.982	87.12	92.757	94.179	75.526	90.531	88.44	92.593	92.6	88.585	87.541	92.073	79.961	89.477	99.629	89.874	70.804	84.19	90
	90.554	80.909	86.189	90.799	91.838	77.267	91.632	91.5	81.029	85.932	65.259	91.053	81.842	89.034	67.505	85.903	84.68	91.007	81.706	102.258	92.068	90	86.805	91.393	90.288	77.605	78.501	88.93	89.661	25.67	84.982	87.12	92.757	94.179	75.526	90.531	88.44	92.593	92.6	88.585	87.541	92.073	79.961	89.477	99.629	84.299	70.804	84.19	90
	90.554	80.909	86.189	90.799	91.838	77.267	86.107	86.098	81.029	85.932	65.259	91.053	81.842	89.151	67.505	85.903	84.68	102.8	81.706	102.258	92.068	90	86.805	91.393	90.288	77.605	78.501	88.93	89.661	25.67	84.982	87.12	92.757	94.179	75.526	90.531	88.44	92.593	92.6	88.585	87.541	90.006	79.961	89.477	99.629	84.299	70.804	84.19	90
	90.554	80.909	86.189	90.799	91.838	77.267	86.107	86.098	81.029	97.551	65.259	91.053	81.842	89.151	67.505	85.903	84.68	102.8	81.706	89.205	92.068	89.999	86.805	89.367	90.288	77.605	78.501	88.93	89.661	21.097	84.982	87.12	92.757	94.179	77.421	90.531	88.44	92.593	92.6	88.585	87.541	90.006	79.961	89.477	99.629	83.498	70.804	84.19	90
	87.158	80.909	86.189	90.799	91.838	77.267	86.107	86.098	81.029	97.551	65.259	91.053	86.234	89.151	67.505	85.903	84.68	102.8	81.706	89.205	92.068	89.999	86.805	89.367	90.288	77.605	78.501	88.93	89.661	21.097	84.982	87.12	92.757	94.179	77.421	90.531	88.44	92.593	92.6	88.585	87.541	90.006	79.961	89.477	99.629	83.498	70.804	93.322	90
	87.158	80.909	86.189	90.799	97.899	77.267	86.107	86.098	81.029	97.551	65.259	91.053	86.234	89.151	67.505	85.903	84.68	102.8	81.706	89.205	92.068	89.999	86.805	89.367	90.288	77.605	78.501	88.93	89.661	62.846	84.982	87.12	92.757	94.179	77.421	90.531	88.44	92.593	92.6	88.585	87.541	90.006	79.961	89.477	99.629	83.498	70.804	93.322	90
	87.158	80.909	86.189	90.799	97.899	77.267	88.712	86.098	81.029	97.551	65.259	91.053	86.234	89.151	67.505	85.903	84.68	97.684	81.706	89.205	92.068	89.999	86.805	89.367	90.288	77.605	67.814	88.93	89.661	62.846	84.982	87.12	92.757	94.179	77.421	90.531	88.44	92.593	92.6	88.585	87.541	90.006	79.961	89.477	99.629	83.498	70.804	102.675	90
	87.158	80.909	86.189	90.799	108.6	77.267	88.712	93.313	81.029	97.551	65.259	89.661	86.234	89.151	67.505	85.903	84.68	97.684	81.706	89.205	92.068	89.999	86.805	89.367	90.288	77.605	67.814	88.93	89.661	71.287	84.982	87.12	92.757	94.179	77.421	90.531	88.44	92.593	92.6	88.585	87.541	90.006	79.961	89.477	99.629	83.498	70.804	102.675	90
	87.158	80.909	86.189	90.799	76.188	77.267	87.833	93.313	81.029	97.551	65.259	89.661	86.234	89.151	67.505	85.903	84.68	97.684	81.706	89.205	92.068	89.999	86.805	89.367	90.288	77.605	72.738	88.93	89.661	71.287	84.982	87.12	92.757	94.179	75.306	90.531	88.44	92.593	92.6	88.585	87.541	90.006	79.961	89.477	99.629	83.498	70.804	102.675	90
	87.899	80.909	86.189	90.799	76.188	77.267	87.833	93.313	81.029	97.551	65.259	89.661	86.234	89.151	67.505	85.903	84.68	97.684	81.706	89.205	92.068	89.999	86.805	89.367	90.288	77.605	72.738	88.93	89.661	71.287	84.982	87.12	92.757	94.179	75.306	90.531	88.44	92.593	92.6	88.585	87.541	90.006	79.961	89.477	99.629	83.498	70.804	102.675	90
	90.407	80.909	86.189	90.799	76.188	77.267	87.833	93.313	81.029	97.551	65.259	89.661	86.234	89.151	67.505	85.903	84.68	97.684	81.706	89.205	92.068	89.999	86.805	89.367	90.288	77.605	72.738	88.93	89.661	71.287	84.982	87.12	92.757	94.179	75.306	90.998	88.44	92.593	92.6	88.585	87.541	90.006	79.961	89.477	99.629	83.498	70.804	102.675	90
	90.407	80.909	86.189	90.799	76.188	77.267	87.298	93.313	81.029	97.551	65.259	89.661	86.234	89.151	67.505	85.903	84.68	97.684	81.706	89.205	92.068	89.999	86.805	89.367	90.288	77.605	72.738	88.93	89.661	71.287	84.982	87.12	92.757	94.179	73.889	90.998	88.44	92.593	92.6	88.585	87.541	90.006	79.961	89.477	99.629	83.498	70.804	102.675	90
	90.407	80.909	86.189	77.635	76.188	77.267	87.298	93.313	81.029	97.551	65.259	89.661	86.234	89.151	67.505	85.903	84.68	97.684	81.706	89.205	92.068	89.999	86.805	89.367	90.288	77.605	72.738	88.93	89.661	71.287	84.982	87.12	86.443	94.179	73.889	90.998	88.44	92.593	92.6	88.585	87.541	90.006	79.961	89.477	99.629	83.498	70.804	102.675	90
	90.407	88.389	86.189	77.635	76.188	77.267	79.532	93.313	81.029	97.551	65.259	89.661	86.234	89.151	67.505	85.903	84.68	97.684	81.706	89.205	92.068	89.999	86.805	89.367	90.288	77.605	72.738	88.93	89.661	63.348	84.982	87.12	86.443	94.179	73.889	90.998	88.44	92.593	92.6	88.585	87.541	90.006	79.961	89.477	99.629	83.498	70.804	81.851	90
	90.407	88.389	86.189	77.635	84.308	77.267	79.532	93.672	81.029	97.551	65.259	89.661	86.234	89.151	67.505	85.903	84.68	97.684	81.706	89.205	92.068	89.999	86.805	89.367	90.288	77.605	72.738	88.93	89.661	63.348	84.982	87.12	86.443	94.179	73.889	90.998	88.44	92.593	92.6	88.585	87.541	90.006	79.961	89.477	99.629	83.498	70.804	81.851	90
	90.407	88.389	86.189	87.624	84.308	77.267	79.532	93.672	81.029	97.551	65.259	89.661	86.234	89.151	67.505	85.903	84.68	97.684	81.706	89.205	92.068	89.999	86.805	89.367	90.288	77.605	72.738	88.93	91.721	63.348	84.982	87.12	86.443	94.179	71.493	87.505	88.44	92.593	92.6	88.585	87.541	90.006	79.961	89.477	99.629	83.498	70.804	81.851	90
	90.407	88.389	86.189	87.624	92.393	77.267	85.334	93.672	87.812	97.551	65.259	88.909	86.234	89.151	69.946	85.903	84.68	84.733	81.706	89.205	92.068	89.999	86.805	89.367	90.288	77.605	72.738	88.93	91.721	63.348	84.982	87.12	86.443	94.179	71.493	87.505	88.44	92.593	92.6	88.585	87.541	90.006	79.961	89.477	88.851	83.498	70.804	81.851	90
	90.407	88.389	86.189	87.624	92.393	77.267	85.334	93.672	87.812	97.551	65.259	88.909	86.234	89.151	69.946	85.903	84.68	84.733	81.706	89.205	92.068	89.999	86.805	89.367	90.288	77.605	76.034	88.93	91.721	63.348	84.982	87.12	86.443	94.179	71.493	91.145	88.44	92.593	92.6	88.585	87.541	90.006	79.961	89.477	88.851	83.498	70.804	81.851	90
	90.407	88.389	86.189	87.624	92.393	77.267	83.272	93.672	87.812	97.551	65.259	88.909	86.234	89.151	69.946	85.903	84.68	84.733	81.706	89.205	92.068	89.999	86.805	89.367	90.288	77.605	76.034	88.93	91.721	63.348	84.982	87.12	86.443	94.179	71.493	91.145	88.44	92.593	92.6	88.585	87.541	90.006	79.961	89.477	88.851	83.498	70.804	88.589	90
	90.407	88.389	86.189	87.624	89.292	77.267	83.272	93.672	87.812	97.551	65.259	87.664	86.234	89.151	69.946	85.903	84.68	84.733	81.706	89.205	92.068	89.999	86.805	89.367	90.288	77.605	76.034	88.93	91.721	63.348	84.982	87.12	86.443	94.179	71.493	91.145	88.44	92.593	92.6	88.585	87.541	90.006	79.961	89.477	88.851	83.498	70.804	88.589	90
	90.407	88.389	86.189	87.624	89.292	77.267	83.272	93.672	87.812	97.551	65.259	87.664	97.285	89.151	69.946	85.903	84.68	90.474	81.706	89.205	92.068	89.999	86.805	89.367	90.288	77.605	76.034	88.93	91.721	63.348	84.982	87.12	86.443	94.179	71.493	91.145	88.44	92.593	92.6	88.585	87.541	90.006	79.961	89.477	88.851	83.498	70.804	88.589	90
	90.407	88.389	86.189	87.624	89.292	77.267	83.272	93.672	87.812	97.551	65.259	87.664	97.285	89.151	69.946	85.903	107.443	90.474	81.706	89.205	92.068	89.999	86.805	89.367	78.329	77.605	76.034	88.93	91.721	52.125	84.982	87.12	92.541	90.968	61.926	85.059	88.44	92.593	92.6	88.585	87.541	90.006	79.961	89.477	88.851	83.498	70.804	88.589	90
	90.407	88.389	86.189	87.624	89.292	77.267	84.539	93.672	87.812	97.551	65.259	87.664	97.285	89.151	69.946	85.903	107.443	90.474	81.706	89.205	92.068	89.999	86.805	89.367	78.329	77.605	76.034	88.93	91.721	52.125	84.982	87.12	92.541	93.282	61.926	85.059	88.44	92.593	92.6	88.585	87.541	90.006	79.961	89.477	88.851	83.498	70.804	88.589	90
	90.407	88.389	86.189	87.624	89.292	77.267	84.539	93.672	87.812	97.551	65.259	87.664	97.285	89.151	69.946	85.903	107.443	90.474	81.706	89.205	92.068	89.999	86.805	89.367	78.329	81.317	76.034	88.93	91.721	52.125	84.982	87.12	90.07	93.282	61.926	85.059	88.44	92.593	92.6	88.585	87.541	90.006	79.961	89.477	88.851	83.498	70.804	88.589	90
	90.407	88.389	86.189	87.624	89.292	77.267	84.539	93.672	95.393	97.551	65.259	87.664	97.285	89.151	69.946	85.903	107.443	87.581	81.706	89.205	92.068	89.999	86.805	89.367	78.329	81.317	76.034	88.93	91.721	52.125	84.982	87.12	90.07	93.282	61.926	86.547	88.44	92.593	92.6	88.585	87.541	90.006	79.961	89.477	88.851	83.498	70.804	90.101	90
	90.407	86.186	86.189	87.624	89.292	77.267	84.539	93.672	95.393	97.551	65.259	87.664	97.285	89.151	69.946	85.903	107.443	87.581	81.706	89.205	92.068	89.999	86.805	89.367	78.329	81.317	76.034	88.93	91.721	52.125	84.982	87.12	90.07	92.361	61.926	86.547	88.44	92.593	92.6	88.585	87.541	85.491	79.961	89.477	88.851	83.498	85.963	90.101	90
	90.407	86.186	86.189	87.624	89.292	77.267	84.539	93.672	91.625	97.551	65.259	87.664	97.285	89.151	69.946	85.903	107.443	87.581	81.706	88.765	92.068	89.999	86.805	89.367	78.329	81.317	76.034	88.93	96.643	52.125	84.982	87.12	90.07	92.361	61.926	86.547	88.44	92.593	92.6	88.585	87.541	85.491	79.961	89.477	88.851	83.498	85.963	90.101	90
	90.407	86.186	86.189	87.624	89.292	77.267	84.539	93.672	91.625	97.551	65.259	99.824	97.285	89.151	69.946	85.903	107.443	87.581	81.706	88.765	92.068	89.999	86.805	89.367	92.202	81.317	84.892	88.93	96.643	52.125	84.982	87.12	90.07	92.361	66.451	90.564	88.44	92.593	92.6	88.585	87.541	85.491	79.961	89.477	88.851	83.498	85.963	90.101	90
	90.407	86.186	86.189	87.624	89.292	77.267	84.539	93.672	91.625	97.551	65.259	99.824	97.285	89.151	69.946	85.903	107.443	87.581	81.706	88.765	92.068	89.999	86.805	89.367	92.202	81.317	84.892	88.93	89.043	52.125	84.982	87.12	90.07	92.361	66.451	90.564	88.44	82.664	92.6	88.585	87.541	85.491	79.961	89.477	88.851	83.498	85.963	90.101	90
	90.407	86.186	86.189	87.624	89.292	77.267	84.539	93.672	91.625	97.551	65.259	79.308	97.285	89.151	69.946	85.903	88.362	87.581	81.706	88.765	92.068	89.999	86.805	89.367	92.202	81.317	84.892	88.93	89.043	52.125	84.982	87.12	90.07	92.361	66.451	90.354	88.44	82.664	92.6	88.585	87.541	85.491	79.961	90.114	88.851	83.498	85.963	86.545	90
	90.407	105.71	86.189	87.624	89.292	77.267	84.539	93.672	91.625	100.715	65.259	79.308	97.285	89.151	69.946	85.903	88.362	87.581	81.706	88.765	92.068	89.999	86.805	89.367	92.202	82.08	84.892	88.93	89.043	52.125	84.982	87.12	90.07	92.361	66.451	90.354	88.44	82.664	92.6	88.585	88.835	85.491	79.961	90.114	88.851	83.498	85.963	86.545	90
	90.407	105.71	86.189	87.624	89.292	77.267	84.539	93.672	91.625	100.715	65.259	79.308	97.285	89.151	69.946	85.903	88.362	87.581	81.706	88.765	92.068	89.999	86.805	89.367	92.202	82.08	84.892	88.93	89.043	52.125	84.982	87.12	88.12	92.361	73.173	90.354	88.44	63.196	92.6	88.585	88.835	85.491	79.961	90.114	88.851	83.498	85.963	86.545	90
	90.407	105.71	86.189	87.624	89.292	77.267	84.539	93.672	91.625	100.715	65.259	80.698	97.285	89.151	69.946	85.903	88.362	87.581	81.706	88.765	92.068	89.999	86.805	89.367	92.202	82.08	90.723	88.93	89.043	52.125	84.982	87.12	88.12	92.361	73.173	90.354	88.44	63.196	92.6	88.585	88.835	85.491	79.961	90.114	88.851	83.498	85.963	86.545	90
	90.407	105.71	86.189	87.624	89.292	71.136	84.539	93.672	91.625	100.715	65.259	80.698	97.285	89.151	69.946	85.903	88.362	87.581	81.706	88.765	92.068	89.999	86.805	89.367	92.202	82.08	90.723	88.93	89.043	52.125	84.982	87.12	88.12	92.361	73.173	90.354	88.44	63.196	92.6	88.585	88.835	85.491	79.961	90.337	88.851	83.498	85.963	86.172	90
	90.407	105.71	86.189	87.624	89.292	71.136	84.539	93.672	91.625	100.715	65.259	80.698	97.285	89.151	51.05	85.903	88.362	87.581	81.706	88.765	92.068	89.999	86.805	89.367	92.202	82.08	90.723	88.93	89.043	52.125	84.982	87.12	97.167	92.361	72.597	90.354	88.44	63.196	92.6	88.585	88.835	85.491	79.961	90.337	88.851	83.498	85.963	86.172	90
	90.407	100.681	86.189	87.624	89.292	78.325	84.539	85.836	91.625	100.715	65.259	80.698	95.989	89.151	51.05	85.903	88.362	87.581	81.706	88.765	92.068	89.999	86.805	89.367	92.202	82.08	90.723	88.93	89.043	52.125	84.982	87.12	97.167	92.361	72.597	90.354	88.44	63.196	92.6	88.585	88.835	85.491	79.961	90.337	88.851	83.498	85.963	86.172	92.716
	90.407	100.681	86.189	87.624	92.43	78.325	84.539	85.836	91.625	100.715	65.259	92.619	95.989	89.151	51.05	85.903	88.362	94.239	81.706	88.765	92.068	89.999	86.805	89.367	92.202	82.08	90.723	88.93	89.043	52.125	84.982	89.145	97.167	92.361	72.597	90.354	88.44	63.196	92.6	88.585	88.835	85.491	79.961	90.337	88.851	83.498	86.192	86.172	92.716
	90.407	100.681	86.189	87.624	92.43	78.325	84.539	85.836	91.625	95.209	65.259	92.619	95.989	89.151	51.05	85.903	88.362	94.239	81.706	88.765	92.068	89.999	86.805	89.367	92.202	82.08	90.723	88.93	89.043	52.125	84.982	89.145	97.167	92.361	72.597	90.354	88.44	63.196	92.6	88.585	88.835	85.491	79.961	90.337	88.851	83.498	86.192	86.172	92.716
	90.407	100.681	86.189	87.624	90	78.325	84.539	85.836	91.625	95.209	65.259	92.619	95.989	89.151	55.41	85.903	88.362	94.239	81.706	88.765	92.068	89.999	86.805	89.367	92.202	82.08	90.723	88.93	89.043	52.125	84.982	92.028	97.167	92.361	71.088	90.354	88.44	63.196	92.6	88.585	88.835	85.491	79.961	90.337	88.851	83.498	86.192	86.172	92.716
	90.407	100.681	86.189	87.624	90	78.325	84.539	85.836	91.625	95.209	65.259	92.619	95.989	89.151	55.41	85.903	88.362	94.239	81.706	88.765	92.068	89.999	86.805	89.367	92.202	82.08	90.723	88.93	89.043	52.125	84.982	92.028	97.167	92.361	71.088	90.354	88.44	63.196	92.6	88.585	88.835	85.491	79.961	90.337	88.851	83.498	86.192	86.172	92.716
	90.407	100.681	86.189	87.624	90	78.325	84.539	85.836	91.625	95.209	65.259	92.619	93.303	89.151	55.41	85.903	88.362	94.239	81.706	88.765	92.068	89.999	86.805	89.367	92.202	82.08	90.723	88.93	89.043	62.083	84.982	92.028	97.167	92.361	71.088	90.354	88.44	63.196	92.6	88.585	88.835	85.491	79.961	90.337	88.851	83.498	86.192	100.269	92.716
	90.407	100.681	86.189	87.624	90	78.325	84.539	85.836	91.625	95.209	65.259	92.619	93.303	89.151	55.41	85.903	88.362	94.239	81.706	88.765	92.068	89.999	86.805	89.367	91.513	82.08	90.723	88.93	89.043	62.083	84.982	92.028	79.409	92.361	71.088	90.354	88.44	63.196	92.6	88.585	88.835	85.491	79.961	90.337	88.851	83.498	86.192	100.269	92.716
	90.407	100.681	86.189	87.624	90	78.325	84.539	85.836	91.625	95.209	65.259	92.619	82.103	89.151	55.41	85.903	88.362	94.239	81.706	88.765	92.068	89.999	86.805	89.367	91.513	83.829	90.723	88.93	89.043	62.083	84.982	92.028	79.409	92.361	71.088	90.354	88.44	63.196	92.6	88.585	88.835	85.491	79.961	90.337	88.851	83.498	86.192	100.269	92.716
	90.407	100.681	86.189	87.624	90	78.325	84.539	85.836	91.625	95.209	65.259	92.619	82.103	89.151	71.188	85.903	88.362	94.239	81.706	88.765	92.068	89.999	86.805	89.367	91.513	83.829	90.723	88.93	89.043	62.083	84.982	92.028	79.409	92.361	71.088	90.354	88.44	63.196	92.6	88.585	88.835	85.491	79.961	90.337	88.851	83.498	86.192	100.269	92.716
	90.407	100.681	86.189	87.624	90	78.325	84.539	85.836	91.625	95.209	65.259	92.619	82.103	89.151	71.188	85.903	88.362	94.239	81.706	88.765	92.068	89.999	86.805	89.367	91.513	83.829	90.723	88.93	89.043	62.083	84.982	92.028	79.409	92.361	71.088	90.354	88.44	63.196	92.6	88.585	88.835	85.491	79.961	90.337	88.851	83.498	86.192	100.269	92.716
	90.407	100.681	86.189	87.624	90	78.325	84.539	85.836	91.625	95.209	65.259	92.619	82.103	89.151	71.188	85.903	88.362	94.239	81.706	88.765	92.068	89.999	86.805	89.367	91.513	83.829	90.723	88.93	89.043	62.083	84.982	92.028	79.409	92.361	71.088	90.354	88.44	63.196	92.6	88.585	88.835	85.491	79.961	90.337	88.851	83.498	86.192	100.269	122.282
	90.407	100.681	86.189	87.624	90	78.325	84.539	79.036	91.625	95.209	65.259	92.619	82.103	89.151	71.188	85.903	88.362	94.239	81.706	88.765	92.068	89.999	86.805	89.367	91.513	83.829	90.723	88.93	89.043	62.083	84.982	92.028	79.409	92.361	71.088	90.354	88.44	63.196	92.6	88.585	88.835	85.491	79.961	90.337	88.851	83.498	86.192	100.269	122.282
	90.407	100.681	86.189	87.624	90	78.325	84.539	79.036	91.625	95.209	65.259	92.619	82.103	89.151	71.188	85.903	88.362	94.239	81.706	88.765	92.068	89.999	86.805	88.309	91.513	83.829	90.723	88.93	89.043	72.512	84.982	92.028	79.409	92.361	71.088	90.354	88.44	63.196	92.6	88.585	88.835	85.491	79.961	90.337	88.851	83.498	86.192	100.066	87.191
	90.407	100.681	86.189	87.624	90	78.325	70.731	79.036	91.625	95.209	65.259	92.619	82.103	89.151	71.188	85.903	93.608	94.239	81.706	88.765	92.068	89.999	86.805	88.309	91.513	83.829	90.723	88.93	95.93	72.512	84.982	92.028	79.409	103.219	71.088	90.354	88.44	63.196	92.6	88.585	88.835	85.491	79.961	90.337	88.851	83.498	86.192	100.066	87.191
	90.407	100.681	86.189	87.624	90	78.325	70.731	79.036	91.625	95.209	65.259	92.619	82.103	89.151	71.188	85.903	93.608	94.239	81.706	88.765	92.068	89.999	86.805	88.309	91.513	83.829	90.723	88.93	95.93	77.924	84.982	92.028	79.409	103.219	71.088	90.354	86.913	63.196	92.6	88.585	88.835	85.491	79.961	90.337	88.851	83.498	86.192	100.066	87.191
	90.407	100.681	86.189	87.624	90	78.325	70.731	79.036	91.625	95.209	65.259	92.619	82.103	89.151	71.188	85.903	93.608	94.239	81.706	88.765	92.068	89.999	86.805	88.309	91.513	83.829	90.723	88.93	95.93	77.924	84.982	92.028	79.409	84.057	71.088	90.354	86.913	63.196	92.6	88.585	88.835	85.491	79.961	90.337	88.851	83.498	86.192	100.066	87.191
	90.407	100.681	86.189	87.624	90	78.325	70.731	94.61	91.625	95.209	65.259	92.619	101.53	89.151	71.188	85.903	93.608	94.239	81.706	88.765	92.068	89.999	86.805	88.309	91.513	83.829	90.723	88.93	95.93	77.924	84.982	92.028	79.409	84.057	71.088	90.354	86.913	63.196	92.6	88.585	88.835	85.491	79.961	90.337	88.851	83.498	86.192	80.923	87.191
	90.407	100.681	86.189	87.624	90	78.325	70.731	94.61	91.625	95.209	65.259	92.619	101.53	89.151	71.188	85.903	93.608	98.702	81.706	88.765	92.068	89.999	86.805	88.309	91.513	83.829	90.723	88.93	95.93	99.345	84.982	88.225	79.409	91.056	71.088	90.354	86.913	70.473	92.6	88.585	83.184	85.491	79.961	90.337	88.851	83.498	86.192	80.923	87.191
	90.407	100.681	86.189	87.624	90	78.325	70.731	87.961	91.625	95.209	65.259	92.619	101.53	89.151	71.188	85.903	93.608	98.702	81.706	88.765	92.068	89.999	86.805	88.309	91.513	83.829	90.723	88.93	95.93	99.345	84.982	88.225	98.717	91.056	71.088	90.354	86.913	70.473	92.6	88.585	83.184	85.491	79.961	90.337	88.851	83.498	86.192	80.923	87.191
	90.407	100.681	86.189	87.624	90	78.325	70.731	87.961	91.625	95.209	65.259	92.619	90	89.151	71.188	85.903	93.608	98.702	81.706	88.765	92.068	89.999	86.805	88.309	91.513	83.829	90.723	88.93	95.93	99.345	84.982	88.225	98.717	91.056	71.088	90.354	86.913	70.473	92.6	88.585	83.184	85.491	79.961	90.337	88.851	83.498	86.192	80.923	88.935
	90.407	100.681	86.189	87.624	90	78.325	70.731	87.961	91.625	95.209	65.259	92.619	90	89.151	71.188	85.903	93.608	98.702	81.706	88.765	92.068	89.999	86.805	88.309	91.513	83.829	90.723	88.93	95.93	99.345	84.982	88.225	98.717	91.056	71.088	90.354	86.913	70.473	92.6	88.585	83.184	85.491	79.961	90.337	88.851	83.498	86.192	93.38	88.935
	90.407	100.681	86.189	87.624	90	78.325	70.731	87.961	91.625	95.209	65.259	92.619	90	89.151	71.188	85.903	93.608	98.702	81.706	88.765	92.068	89.999	86.805	89.176	91.513	79.529	90.723	88.93	95.93	99.345	84.982	88.225	98.717	91.056	71.088	90.354	86.913	70.473	92.6	88.585	83.184	85.491	79.961	90.337	88.851	83.498	86.192	93.38	88.935
	90.407	100.681	86.189	87.624	90	78.325	66.797	91.475	91.625	95.209	65.259	92.619	90	89.151	71.188	85.903	93.608	98.702	81.706	88.765	92.068	89.999	86.805	89.176	91.513	79.529	90.723	88.93	95.93	99.345	84.982	88.225	93.445	91.056	71.088	90.354	86.913	70.473	92.6	88.585	83.184	85.491	79.961	90.337	88.851	83.498	86.192	93.38	88.935
	90.407	100.681	86.189	87.624	90	78.325	66.797	91.475	91.625	95.209	65.259	92.619	90	89.151	71.188	85.903	93.608	98.702	81.706	88.765	106.572	89.999	86.805	89.176	91.513	79.529	90.723	88.93	95.93	99.345	84.982	88.225	93.445	91.056	71.088	90.354	86.913	70.473	92.6	88.585	83.184	85.491	79.961	90.337	88.851	83.498	86.192	93.38	88.935
	90.407	100.681	86.189	87.624	90	78.325	66.797	91.475	91.625	95.209	65.259	92.619	90	89.151	71.188	85.903	93.608	98.702	81.706	88.765	106.572	89.999	86.805	89.176	91.513	79.529	90.723	88.93	95.93	99.345	84.982	88.225	93.445	91.056	65.014	90.354	86.913	70.473	92.6	88.585	83.184	85.491	79.961	90.337	88.851	83.498	86.192	93.38	88.935
	90.407	100.681	86.189	87.624	90	78.325	72.772	91.475	91.625	95.209	65.259	92.619	90	89.151	71.188	85.903	93.608	98.702	81.706	88.765	106.572	89.999	86.805	89.176	91.513	79.529	90.723	88.93	95.93	99.345	84.982	91.201	93.445	91.056	65.014	90.354	86.913	70.473	92.6	88.585	83.184	85.491	79.961	90.337	88.851	83.498	86.192	93.38	88.935
	90.407	100.681	86.189	87.624	90	78.325	72.772	87.681	91.625	95.209	65.259	92.619	90	82.646	71.188	85.903	93.608	98.702	81.706	88.765	106.572	89.999	86.805	89.176	91.513	79.529	90.723	88.93	95.93	99.345	84.982	91.201	93.445	91.056	100.039	90.354	86.913	70.473	92.6	88.585	83.184	85.491	79.961	90.337	88.851	83.498	86.192	93.38	88.935
	90.407	100.681	86.189	87.624	90	78.325	72.772	87.681	91.625	95.209	65.259	93.41	90	82.646	71.188	85.903	93.608	98.702	81.706	88.765	92.699	89.999	86.805	89.176	91.513	79.529	90.723	88.93	95.93	99.345	84.982	91.201	94.883	91.056	100.039	90.354	86.913	70.473	92.6	88.585	83.184	85.491	79.961	90.337	88.851	83.498	86.192	93.38	88.935
	90.407	100.681	86.189	87.624	90	78.325	72.772	87.681	91.625	95.209	65.259	93.41	86.403	82.646	71.188	85.903	93.608	98.702	81.706	88.765	92.699	89.999	86.805	89.176	91.513	85.792	90.723	88.93	95.93	99.345	84.982	91.201	94.883	91.056	100.039	90.354	86.913	70.473	92.6	88.585	83.184	85.491	79.961	90.337	88.851	83.498	86.192	93.38	88.935
	90.407	100.681	86.189	87.624	90	78.325	79.131	86.076	91.625	95.209	65.259	93.41	86.403	82.646	68.844	85.903	93.608	98.702	81.706	88.765	92.699	89.999	86.805	89.176	91.513	85.792	90.723	88.93	95.93	99.345	84.982	91.201	94.883	91.056	100.039	90.354	86.913	70.473	92.6	88.585	83.184	85.491	79.961	90.337	88.851	83.498	86.192	93.38	88.935
	90.407	100.143	86.189	87.624	90	78.325	79.131	86.076	91.625	95.209	65.259	93.41	86.403	82.646	68.844	85.903	93.608	98.702	81.706	88.765	92.699	89.999	86.805	89.176	91.513	85.792	90.723	88.93	95.93	99.345	84.982	91.201	94.883	91.056	100.039	90.354	86.913	70.473	92.6	88.585	92.463	85.491	79.961	90.337	88.851	83.498	86.192	93.38	88.935
	90.407	100.143	86.189	87.624	90	78.325	79.131	86.076	91.625	95.209	65.259	93.41	86.403	82.646	68.844	85.903	93.608	98.702	81.706	88.765	92.699	89.999	81.859	89.176	91.513	85.792	90.723	88.93	95.937	99.345	84.982	91.201	94.883	91.056	100.039	90.354	86.321	70.473	92.6	88.585	92.463	85.491	79.961	90.337	88.851	83.498	86.192	93.38	88.935
	90.407	92.111	86.189	87.624	90	78.325	80.326	86.076	91.625	95.209	65.259	93.41	96.708	82.646	73.942	85.903	93.608	98.702	81.706	88.765	92.699	89.999	81.859	89.176	91.513	85.792	90.723	88.93	95.937	99.345	84.982	91.201	86.988	91.056	95.237	90.354	86.321	70.473	92.6	88.585	92.463	85.491	79.961	90.337	88.851	83.498	86.192	93.38	88.935
	90.407	92.111	86.189	87.624	90	79.645	80.326	86.076	91.625	95.209	65.259	93.41	96.708	82.646	73.942	85.903	93.608	98.702	81.706	95.475	92.699	90	82.275	89.176	91.513	85.792	90.723	88.93	91.226	99.345	84.982	91.201	86.988	91.056	95.237	90.354	86.321	70.473	92.6	88.585	92.463	85.491	79.961	90.337	88.851	83.498	86.192	93.38	88.935
	90.407	92.111	86.189	87.624	90	79.645	80.326	94.907	91.625	95.209	65.259	93.41	96.708	82.646	73.942	85.903	93.608	98.702	81.706	95.475	92.699	90	82.275	89.176	91.513	85.792	90.723	88.93	91.226	99.345	84.982	91.201	86.988	91.056	95.237	88.405	86.321	70.473	92.6	88.585	92.463	85.491	79.961	90.337	88.851	83.498	86.192	93.38	88.935
	90.407	92.111	86.189	87.624	90	79.645	80.326	94.907	91.625	95.209	65.259	93.41	96.708	91.777	65.202	85.903	93.608	98.702	81.706	95.475	92.699	90	82.275	89.176	91.513	85.792	90.723	88.93	91.226	99.345	84.982	91.201	86.988	91.056	95.237	88.405	86.321	70.473	92.6	88.585	92.463	85.491	79.961	90.337	88.851	83.498	86.192	93.38	88.935
	90.407	92.111	86.189	87.624	90	79.645	80.326	94.907	91.625	95.209	65.259	93.41	91.19	91.777	65.202	85.903	93.608	98.702	81.706	95.475	92.699	90	82.275	89.176	91.513	85.792	90.723	88.93	91.226	99.345	84.982	91.201	86.988	91.056	94.843	88.405	86.321	70.473	92.6	88.585	92.463	85.491	79.961	90.337	88.851	83.498	86.192	93.38	88.935
	90.407	92.111	86.189	87.624	90	79.645	80.326	94.907	91.625	95.209	65.259	93.41	91.19	97.903	65.202	85.903	93.608	98.702	81.706	95.475	92.699	90	82.275	89.176	91.513	85.381	90.723	88.93	91.226	99.345	84.982	91.201	91.255	91.056	94.843	88.405	82.511	70.473	92.6	88.585	92.463	85.491	79.961	90.337	88.851	83.498	86.192	93.38	88.935
	90.407	92.111	86.189	87.624	90	79.645	80.326	90.614	91.625	95.209	65.259	95.616	87.736	97.903	65.202	85.903	93.608	98.702	81.706	95.475	92.699	90	82.275	89.176	91.513	85.381	90.723	88.93	91.226	99.345	84.982	91.201	91.255	91.056	94.843	88.405	82.511	70.473	92.6	88.585	92.463	85.491	79.961	90.337	88.851	83.498	86.192	93.38	88.935
	90.407	92.111	86.189	87.624	90	79.645	76.37	90.614	91.625	95.209	65.259	95.616	87.736	84.606	65.202	85.903	93.608	98.702	81.706	95.475	92.699	90	82.275	89.176	91.513	85.381	90.723	88.93	91.226	99.345	84.982	91.201	91.255	91.056	94.843	88.405	82.511	70.473	92.6	88.585	92.463	85.491	79.961	90.337	88.851	83.498	86.192	93.38	87.938
	90.407	92.111	86.189	87.624	90	79.645	76.37	90.614	91.625	95.209	65.259	95.616	87.736	84.606	66.891	94.986	93.608	98.702	81.706	95.475	92.699	90	83.967	89.176	91.513	85.381	90.723	88.93	91.226	99.345	84.982	87.591	91.255	91.056	94.843	88.405	82.511	87.398	92.6	88.585	92.463	85.491	79.961	90.337	88.851	83.498	86.192	93.38	87.938
	90.407	92.111	86.189	87.624	90	79.645	76.37	90.614	91.625	95.209	65.259	95.616	87.736	84.606	66.891	94.986	83.627	98.702	81.706	95.475	92.699	90	83.967	89.176	91.513	85.381	90.723	88.93	91.226	99.345	84.982	87.591	91.255	91.056	94.843	88.405	82.511	87.398	92.6	88.585	92.463	85.491	79.961	90.337	91.926	83.498	86.192	93.38	85.382
	90.407	92.111	86.189	87.624	90	79.645	76.37	90.614	91.625	95.209	65.259	95.616	87.736	84.606	66.891	94.986	83.627	98.702	81.706	95.475	92.699	90	83.967	89.176	91.513	85.381	90.723	88.93	78.48	99.345	84.982	87.591	91.255	91.056	94.843	88.405	82.511	87.398	92.6	88.585	92.463	85.491	79.961	90.337	91.926	83.498	86.192	93.38	85.382
	90.407	92.111	86.189	87.624	90	79.645	76.37	90.614	91.625	95.209	65.259	95.616	87.736	84.606	66.891	94.986	83.627	90.831	81.706	95.475	92.699	90	83.967	89.176	91.513	85.381	90.723	88.93	78.48	99.345	84.982	87.591	91.255	91.056	94.843	88.405	82.511	76.91	92.6	88.585	92.463	85.491	79.961	90.337	91.926	83.498	86.192	93.38	85.382
	90.407	92.111	86.189	87.624	90	79.645	84.714	90.614	91.625	95.209	65.259	95.616	87.736	84.606	66.891	94.986	68.755	90.831	81.706	95.475	92.699	90	83.967	89.176	91.513	85.381	90.723	88.93	85.495	99.345	84.982	87.591	91.255	91.056	94.843	88.405	82.511	76.91	92.6	88.585	92.463	85.491	79.961	90.337	91.926	83.498	86.192	93.38	84.744
	90.407	92.111	86.189	87.624	90	79.645	84.714	90.614	91.625	95.209	65.259	88.241	87.736	84.606	66.891	94.986	68.755	90.831	81.706	95.475	92.699	90	83.967	89.176	91.513	85.381	92.404	88.93	85.495	99.345	84.982	87.591	91.255	91.056	94.843	88.405	89.552	76.91	92.6	88.585	92.463	85.491	79.961	90.337	91.926	83.498	86.192	91.268	84.744
	90.407	92.111	86.189	87.624	90	79.645	84.714	90.614	91.625	95.209	65.259	88.241	87.736	84.606	62.049	94.986	68.755	90.831	81.706	95.475	92.699	90	83.967	89.176	91.513	85.381	92.404	88.93	85.495	99.345	84.982	87.591	91.255	91.056	94.843	88.405	89.552	76.91	92.6	88.585	92.463	85.491	79.961	90.337	91.926	83.498	86.192	91.268	84.744
	90.407	92.111	86.189	87.624	90	79.645	84.714	81.516	91.625	95.209	65.259	88.241	87.736	84.606	62.049	94.986	91.202	90.831	81.706	95.475	92.699	90	82.465	92.542	91.513	85.381	92.404	88.93	88.765	99.345	84.982	87.591	91.255	91.056	94.843	88.405	89.552	76.91	92.6	88.585	92.463	85.491	79.961	90.337	91.926	83.498	86.192	91.268	84.744
	90.407	92.111	86.189	87.624	90	79.645	85.74	81.516	91.625	95.209	65.259	88.241	93.936	84.606	62.049	93.222	91.202	90.831	81.706	88.306	92.699	90	82.465	92.542	91.513	85.381	88.517	88.93	88.765	99.345	84.982	91.285	91.255	91.056	94.843	88.405	87.574	76.91	92.6	88.585	92.463	85.491	79.961	90.337	91.926	83.498	86.192	91.268	88.296
	90.407	98.063	86.189	87.624	90	79.645	85.74	91.897	91.625	95.209	65.259	88.241	93.936	84.606	62.049	93.222	89.653	90.831	81.706	88.306	92.699	90	82.465	92.542	91.513	85.381	88.517	88.93	88.765	99.345	84.982	91.285	90	91.056	94.843	88.405	87.574	76.91	92.6	88.585	92.463	85.491	79.961	90.337	91.926	83.498	86.192	91.268	88.296
	90.407	98.063	86.189	87.624	90	79.645	85.74	91.897	91.625	95.209	65.259	88.241	94.168	84.606	62.049	93.222	89.653	90.831	81.706	88.306	92.699	90	82.465	92.542	91.513	85.381	88.651	88.93	88.765	99.345	84.982	91.285	90	91.056	94.843	88.405	87.574	76.91	92.6	88.585	92.463	85.491	79.961	90.337	91.926	83.498	86.192	91.268	88.296
	90.407	98.063	86.189	87.624	90	79.645	85.74	91.897	91.625	95.209	65.259	88.241	94.168	84.606	62.049	93.222	89.653	90.831	81.706	88.306	92.699	90	82.465	92.542	91.513	85.381	88.651	88.93	88.765	99.345	84.982	91.285	90	91.056	94.843	88.405	87.574	76.91	92.6	88.585	92.463	85.491	79.961	90.337	91.926	83.498	86.192	91.268	88.296
	90.407	98.063	86.189	87.624	90	79.645	85.74	91.897	91.625	95.209	65.259	88.241	94.168	84.606	67.091	93.222	89.653	90.831	81.706	88.306	92.699	90	82.465	92.542	91.513	85.381	88.651	88.93	88.765	99.345	84.982	91.285	90	91.056	94.843	88.405	87.574	76.91	92.6	88.585	92.463	85.491	79.961	90.337	91.926	83.498	86.192	91.268	88.296
	90.407	98.063	86.189	87.624	90	79.645	85.74	91.897	91.625	95.209	65.259	88.241	96.959	84.606	67.091	93.222	89.653	88.7	81.706	88.306	92.699	90	82.465	92.542	91.513	85.381	88.651	88.93	88.765	99.345	84.982	91.285	90	91.056	94.843	88.405	87.574	76.91	92.6	88.585	92.463	85.491	79.961	90.337	91.926	83.498	86.192	91.268	88.296
	90.407	98.063	86.189	87.624	90	79.645	85.74	91.897	91.625	95.209	65.259	88.241	96.959	84.606	67.091	93.222	89.653	88.7	81.706	88.306	92.699	90	82.465	92.542	91.513	85.381	88.651	88.93	88.765	99.345	84.982	91.285	90	89.847	94.843	88.405	87.574	76.91	92.6	88.585	92.463	85.491	79.961	90.337	91.926	83.498	86.192	91.268	88.296
	90.407	98.063	86.189	87.624	90	79.645	85.74	87.016	91.625	95.209	65.259	88.241	96.959	84.606	67.091	93.222	89.653	88.7	81.706	88.306	92.699	90	82.465	92.542	91.513	85.381	88.651	88.93	88.765	99.345	84.982	83.712	90	89.847	94.843	88.405	87.574	76.91	92.6	88.585	92.463	85.491	79.961	90.337	91.926	83.498	86.192	91.268	88.296
	90.407	98.063	86.189	87.624	90	79.645	85.74	87.016	91.625	95.209	65.259	88.241	96.959	84.606	73.372	93.222	89.653	88.7	81.706	88.306	92.699	90	82.465	92.542	91.513	83.506	88.651	98.768	88.765	99.345	84.982	83.712	90	89.847	94.843	88.405	112.371	76.91	92.6	90.34	92.463	85.491	79.961	90.337	91.926	83.498	86.192	91.268	88.296
	90.407	122.518	86.189	87.624	90	79.645	85.74	87.016	91.625	95.209	65.259	88.241	93.575	84.606	73.372	93.222	89.653	88.7	81.706	88.306	92.699	90	82.465	92.542	91.513	83.506	88.651	98.768	88.765	99.345	84.982	83.712	90	89.847	94.843	88.405	112.371	76.91	92.6	90.34	92.463	85.491	79.961	90.337	91.926	83.498	86.192	84.648	79.071
	90.407	122.518	86.189	87.624	90	79.645	70.899	87.016	91.625	95.209	65.259	88.241	93.575	84.606	73.372	93.222	89.653	88.7	81.706	88.306	92.699	90	82.465	92.542	91.513	83.506	88.651	98.768	88.765	99.345	84.982	83.712	90	89.847	94.843	88.405	112.371	76.91	92.6	90.34	92.463	85.491	79.961	90.337	91.926	83.498	86.192	84.648	79.071
	90.407	122.518	86.189	87.624	90	79.645	70.899	87.016	91.625	95.209	65.259	88.75	85.545	84.606	73.372	93.222	89.653	88.7	81.706	88.306	92.699	90	82.465	92.542	91.513	83.506	88.651	98.768	94.721	99.345	84.982	83.712	90	89.847	94.843	88.405	112.371	76.91	92.6	90.34	92.463	85.491	79.961	90.337	91.926	83.498	86.192	84.648	99.259
	90.407	122.518	86.189	87.624	90	79.645	70.899	87.016	91.625	95.209	65.259	88.75	85.545	84.606	73.372	91.851	89.653	88.7	81.706	88.306	92.699	90	82.465	92.542	91.513	83.506	88.651	98.768	94.721	99.345	84.982	83.712	90	89.847	94.843	88.405	112.371	76.91	92.6	90.34	92.463	85.491	79.961	90.337	98.064	83.498	86.192	90.812	99.259
	90.407	122.518	86.189	87.624	90	79.645	70.899	87.016	91.625	95.209	65.259	88.75	105.005	84.606	73.372	91.851	89.653	88.7	81.706	88.306	92.699	90	82.465	92.542	91.513	83.506	88.651	98.768	94.721	99.345	84.982	83.117	79.857	89.847	94.843	94.034	112.371	76.91	92.6	90.34	92.463	85.491	79.961	90.337	98.064	83.498	86.192	78.535	90.619
	90.407	93.018	86.189	87.624	90	79.645	69.598	87.016	91.625	95.209	65.259	88.75	105.005	84.606	73.372	91.851	89.653	100.008	81.706	88.306	92.699	90	82.465	92.542	91.513	83.506	88.651	98.768	94.721	76.662	84.982	83.117	79.857	89.847	94.843	94.034	100.547	76.91	92.6	90.34	92.463	85.491	79.961	90.337	98.064	83.498	86.192	78.535	90.619
	90.407	93.018	86.189	87.624	90	79.645	69.598	93.41	91.625	95.209	65.259	88.75	105.005	84.606	73.372	91.851	89.653	100.008	81.706	94.752	92.699	90	82.465	92.542	91.513	83.506	88.651	98.768	94.721	76.662	84.982	83.117	79.857	89.847	94.843	94.034	100.547	76.91	92.6	90.34	92.463	85.491	79.961	90.337	98.064	83.498	86.192	78.535	90.619
	90.407	93.018	86.189	87.624	90	79.645	69.785	93.41	91.625	95.209	65.259	88.75	105.005	84.606	73.372	91.851	89.653	100.008	81.706	94.752	92.699	90	82.465	92.542	91.513	83.506	88.651	90.542	94.721	76.662	84.982	83.117	79.857	89.847	94.843	94.034	100.547	76.91	92.6	90.34	92.463	85.491	79.961	90.337	98.064	83.498	86.192	78.535	90.619
	90.407	93.018	86.189	87.624	90	79.645	69.785	93.41	91.625	95.209	65.259	88.75	82.412	84.606	73.372	90.798	89.653	100.008	81.706	94.752	92.699	90	82.465	92.542	91.513	83.506	88.651	90.542	94.721	76.662	84.982	95.621	94.141	89.847	94.843	92.479	100.547	76.91	92.6	90.34	92.463	85.491	79.961	90.337	98.064	83.498	86.192	87.4	90.619
	90.407	93.018	86.189	87.624	90	79.645	69.785	93.41	91.625	95.209	65.259	88.75	82.412	84.606	73.372	90.798	103.227	100.008	81.706	94.752	92.699	90	82.465	92.542	91.513	83.506	88.651	90.542	94.721	76.662	84.982	95.621	94.141	89.847	94.843	92.479	112.201	76.91	92.6	90.34	92.463	85.491	79.961	90.337	98.064	83.498	86.192	87.4	90.619
	90.407	93.018	86.189	83.93	90	79.645	69.785	93.41	91.625	95.209	65.259	88.75	82.412	84.606	73.372	90.798	103.227	100.008	81.706	94.752	92.699	90	82.465	92.542	91.513	83.506	88.651	90.542	94.721	76.662	84.982	95.621	94.141	89.847	94.843	92.479	112.201	76.91	92.6	90.34	92.463	85.491	79.961	90.337	98.064	83.498	86.192	87.4	90.619
	90.407	93.018	86.189	100.315	90	79.645	69.785	93.41	91.625	95.209	65.259	88.75	82.412	84.606	73.372	90.798	103.227	100.008	81.706	94.752	92.699	90	82.465	92.542	91.513	81.233	90.638	90.542	82.921	76.662	84.982	95.621	94.141	89.847	94.843	92.479	112.201	76.91	92.6	90.34	92.463	85.491	79.961	90.337	98.064	83.498	86.192	87.4	90.619
	90.407	93.018	86.189	100.315	90	79.645	69.785	93.41	91.625	95.209	65.259	88.75	82.412	84.606	73.372	90.798	103.227	83.876	81.706	94.752	92.699	90	82.465	92.542	91.513	81.233	90.638	90.542	82.921	76.662	84.982	95.621	96.141	89.847	94.843	92.479	112.201	76.91	92.6	90.34	92.463	85.491	79.961	90.337	98.064	83.498	86.192	112.799	90.619
	90.407	93.018	86.189	100.315	90	79.645	69.785	83.798	79.453	95.209	65.259	85.734	82.412	84.606	73.372	90.798	103.227	83.876	81.706	94.752	92.699	90	82.465	92.542	91.513	81.233	90.638	90.542	90.995	76.662	83.924	95.621	96.141	89.847	94.843	92.479	112.201	76.91	92.6	90.34	92.463	85.491	79.961	90.337	98.064	83.498	86.192	112.799	90.619
	90.407	93.018	86.189	88.508	86.203	79.645	69.785	83.798	79.453	95.209	65.259	85.734	82.412	84.606	73.372	90.798	103.227	83.876	81.706	94.752	92.699	90	82.465	92.542	91.513	81.233	90.638	90.542	90.995	76.662	83.924	95.621	96.141	89.847	94.843	92.479	112.201	76.91	92.6	90.34	92.463	85.491	79.961	90.337	79.1	83.498	86.192	95.784	90.619
	90.407	93.018	86.189	88.508	86.203	79.645	69.785	94.13	91.165	95.209	65.259	85.734	82.412	84.606	65.901	90.798	105.306	83.876	81.706	94.752	92.699	90	82.465	92.542	91.513	81.233	90.638	90.542	90.995	76.662	83.924	95.621	96.141	89.847	94.843	92.479	91.192	76.91	92.6	90.34	92.463	85.491	79.961	90.337	79.1	83.498	86.192	95.784	90.619
	90.407	93.018	86.189	88.508	86.203	79.645	69.785	94.13	91.165	95.209	65.259	85.734	82.412	84.606	65.901	90.798	105.306	83.876	81.706	94.752	92.699	90	82.465	92.542	91.513	81.233	96.034	90.542	90.995	76.662	83.924	95.621	96.141	89.847	94.843	92.479	91.192	76.91	92.6	90.34	92.463	85.491	79.961	90.337	79.1	83.498	86.192	90.331	90.619
	90.407	93.018	86.189	88.508	86.203	79.645	69.785	94.13	91.165	95.209	65.259	85.734	82.412	84.606	79.569	90.798	105.306	83.876	81.706	94.752	92.699	90	82.465	92.542	91.513	81.233	96.034	90.542	90.995	76.662	83.924	95.621	96.141	89.847	94.843	92.479	91.192	76.91	92.6	90.34	92.463	85.491	79.961	90.337	79.1	83.498	86.192	90.331	90.619
	90.407	93.018	86.189	88.508	88.688	79.645	69.785	96.712	91.165	95.209	65.259	85.734	82.412	84.606	79.569	103.331	92.466	83.876	81.706	85.005	92.699	90	82.465	92.542	91.513	81.233	96.034	90.542	90.995	76.662	83.924	84.202	96.141	89.847	94.843	92.479	89.587	76.91	92.6	90.34	92.463	85.491	79.961	90.337	79.1	83.498	86.192	90.331	90.619
	90.407	93.018	86.189	88.508	88.688	79.645	69.785	96.712	91.165	95.209	65.259	85.734	82.412	84.606	79.569	103.331	92.466	83.876	81.706	85.005	92.699	87.698	82.465	92.542	91.513	81.233	96.034	90.542	90.995	76.662	83.924	84.202	96.141	89.847	94.843	92.479	89.587	76.91	92.6	90.34	92.463	85.491	79.961	90.337	79.1	83.498	86.192	90.331	90.619
	90.407	93.018	86.189	88.508	88.688	79.645	69.785	96.712	91.165	95.209	65.259	85.734	82.412	84.606	76.722	103.331	82.137	83.876	81.706	93.07	92.699	87.698	82.465	92.542	91.513	81.233	96.034	90.542	90.995	93.768	83.924	84.202	96.141	89.847	94.843	92.479	89.587	76.91	92.6	90.34	92.463	85.491	79.961	90.337	79.1	83.498	86.192	81.917	90.619
	90.407	93.018	86.189	88.508	88.688	79.645	69.785	84.831	91.165	95.209	65.259	85.734	90.257	84.606	76.722	91.378	82.137	83.876	81.706	93.07	92.699	90.949	82.465	92.542	91.513	81.233	96.034	90.542	90.995	93.768	83.924	84.202	84.767	89.847	94.843	90	87.335	76.91	92.6	90.34	92.463	85.491	79.961	90.337	79.1	83.498	86.192	81.917	90.619
	90.407	93.018	86.189	97.385	88.688	79.645	69.785	84.831	91.165	95.209	65.259	89.637	90.257	84.606	76.722	91.378	82.137	83.876	81.706	93.07	92.699	90.949	82.465	92.542	91.513	81.233	96.034	90.542	90.995	93.768	83.924	90.633	84.767	89.847	94.843	90	87.335	76.91	92.6	90.34	92.463	85.491	79.961	90.337	79.1	83.498	86.192	81.917	90.619
	90.407	96.334	86.189	97.385	88.688	79.645	69.785	88.779	91.165	95.209	65.259	89.637	89.659	84.606	76.722	91.378	82.137	83.876	81.706	93.07	92.699	90.949	82.465	92.542	91.513	81.233	96.034	90.542	90.995	93.768	83.924	90.633	84.767	89.847	94.843	90	87.335	76.91	92.6	90.34	92.463	85.491	79.961	90.337	79.1	83.498	86.192	81.917	90.619
	90.407	96.334	86.189	97.385	88.688	79.645	69.785	88.779	91.165	95.209	65.259	90.726	89.659	84.606	76.722	91.378	82.137	83.876	81.706	93.07	92.699	90.949	82.465	90.103	91.513	81.233	96.034	90.542	90.995	93.768	83.924	90.633	84.767	89.847	94.843	90	87.335	76.91	92.6	90.34	92.463	85.491	79.961	90.337	79.1	83.498	86.192	81.917	90.619
	86.46	96.334	86.189	97.385	90.953	79.645	59.917	88.779	91.165	95.209	65.259	87.225	89.659	84.606	76.722	91.378	82.137	83.876	81.706	93.07	92.699	90.949	82.465	90.103	91.513	81.233	96.034	90.542	90.995	93.768	83.924	90.633	84.767	89.847	94.843	90	87.335	76.91	92.6	90.34	92.463	85.491	79.961	90.337	79.1	83.498	86.192	81.917	90.619
	86.46	96.334	86.189	97.385	90.953	79.645	59.917	88.779	91.165	95.209	65.259	87.225	90.051	84.606	76.722	91.378	88.362	83.876	81.706	93.07	92.699	90.949	82.465	90.103	91.513	81.233	96.034	90.542	89.651	93.768	83.924	90.633	84.767	89.847	94.843	90	87.335	76.91	92.6	90.34	92.463	85.491	79.961	90.337	79.1	83.498	86.192	81.917	88.602
	86.46	96.334	86.189	97.385	90.953	79.645	59.917	88.779	91.165	95.209	65.259	87.225	90.051	84.606	76.722	91.378	88.362	83.876	81.706	93.07	92.699	90.949	82.465	93.13	91.513	81.233	96.034	90.542	89.651	93.768	83.924	90.633	89.84	89.847	94.843	90	87.335	76.91	92.6	90.34	92.463	85.491	79.961	90.337	79.1	83.498	86.192	81.917	88.602
	86.46	96.334	86.189	97.385	90.953	79.645	59.917	88.779	91.165	95.209	65.259	87.225	90.051	84.606	76.722	91.378	89.912	83.876	81.706	84.625	92.699	90.949	82.465	93.13	91.513	81.233	96.034	90.542	89.651	93.768	83.924	90.633	89.84	89.847	94.843	90	87.335	76.91	92.6	90.34	92.463	85.491	79.961	90.337	79.1	83.498	86.192	105.87	88.602
	86.46	96.334	86.189	97.385	90.953	79.645	70.256	88.779	91.165	95.209	65.259	87.225	90.051	84.606	76.722	91.378	89.912	83.876	81.706	84.625	92.699	90.949	82.465	93.13	91.513	81.233	91.746	90.542	88.301	93.768	83.924	90.633	89.84	89.847	94.843	90	87.335	76.91	92.6	90.34	92.463	85.491	79.961	90.337	79.1	83.498	86.192	105.87	90.376
	86.46	96.334	86.189	97.385	90.953	79.645	70.256	88.779	91.165	95.209	65.259	87.225	90.051	84.606	76.722	91.378	85.661	83.876	81.706	84.625	92.699	90.949	82.465	93.13	91.513	81.233	91.746	90.542	88.301	93.768	83.924	90.633	89.84	89.847	94.843	90	87.335	76.91	92.6	90.34	92.463	85.491	79.961	90.337	79.1	83.498	86.192	105.87	90.376
	86.46	96.334	86.189	97.385	93.731	79.645	70.256	90	94.545	95.209	65.259	87.225	90.051	84.606	76.31	91.378	85.661	83.876	81.706	84.625	92.699	90.949	82.465	93.13	91.513	81.233	91.746	90.542	88.301	93.768	83.924	90.633	89.84	89.847	94.843	90	87.335	76.91	92.6	90.34	92.463	85.491	79.961	90.337	79.1	83.498	86.192	105.87	94.766
	86.46	96.334	86.189	97.385	93.731	79.645	70.256	90	94.545	95.209	65.259	87.225	90.051	84.606	76.31	91.378	85.661	83.876	81.706	84.625	92.699	90.949	82.465	90.341	91.513	81.233	91.746	90.542	88.301	93.768	83.924	90.633	89.84	89.847	94.734	90	91.909	76.91	92.6	90.34	92.463	83.206	79.961	90.337	79.1	83.498	86.192	105.87	94.766
	86.46	96.334	86.189	97.385	93.731	79.645	70.256	90	94.545	95.209	65.259	87.225	90.051	84.606	76.31	91.378	85.661	83.876	81.706	89.632	92.699	90.949	82.465	90.341	91.513	81.233	91.746	90.542	88.301	93.768	83.924	90.633	89.84	89.847	94.734	90	91.909	76.91	92.6	90.34	92.463	83.206	79.961	90.337	79.1	83.498	86.192	92.078	94.766
	86.46	96.334	86.189	97.385	93.731	79.645	70.256	90	94.545	95.209	65.259	87.225	90.051	86.611	76.31	91.378	85.661	83.876	81.706	89.632	92.699	90.949	82.465	90.341	91.513	81.233	91.746	90.542	88.301	93.768	83.924	90.633	89.84	89.847	90.182	90	91.909	76.91	92.6	90.34	92.463	93.63	79.961	90.337	79.1	83.498	86.192	92.078	94.766
	86.46	96.334	86.189	97.385	93.731	79.645	81.974	90	94.545	95.209	65.259	87.225	90.051	86.611	76.31	91.378	91.714	83.876	81.706	89.632	92.699	90.949	82.465	90.341	91.513	81.233	91.746	90.542	88.301	93.768	83.924	90.633	89.84	89.847	90.182	90	91.909	76.91	92.6	90.34	92.463	93.63	79.961	90.337	79.1	83.498	86.192	92.078	94.766
	86.46	96.334	86.189	97.385	80.53	79.645	81.974	90	94.545	95.209	65.259	87.225	90.051	86.611	76.31	91.378	91.714	83.876	81.706	89.632	92.699	90.949	82.465	90.341	91.513	81.233	91.746	90.542	88.536	93.768	83.924	90.633	89.84	89.847	90.182	90	91.909	76.91	92.6	90.34	92.463	89.371	79.961	90.337	79.1	83.498	86.192	92.078	94.766
	86.46	96.334	86.189	97.385	80.53	79.645	81.974	90	94.545	95.209	65.259	87.225	90.051	86.611	76.31	91.378	91.714	83.876	81.706	89.632	92.699	90.949	82.465	90.341	91.513	81.233	91.746	90.542	89.389	93.768	83.924	90.633	89.84	89.847	90.182	90	91.909	76.91	92.6	90.34	92.463	89.371	79.961	90.337	78.573	83.498	86.192	96.321	94.766
	86.46	96.334	86.189	97.385	91.063	79.645	81.974	92.576	94.545	95.209	65.259	87.225	90.051	86.611	76.31	91.378	91.714	83.876	81.706	89.632	92.699	90.949	82.465	81.733	91.513	81.233	91.746	90.542	89.389	93.768	83.924	90.633	89.84	89.847	90.182	90	91.909	76.91	92.6	90.34	92.463	89.371	79.961	90.337	78.573	83.498	86.192	96.321	84.927
	81.16	96.334	86.189	92.861	91.063	79.645	81.974	92.576	94.545	95.209	65.259	87.225	90.051	86.611	76.31	91.378	91.714	83.876	81.706	89.632	92.699	90.949	82.465	81.733	91.513	81.233	91.746	90.542	89.389	93.768	83.924	90.633	89.84	89.847	90.182	90	91.909	76.91	92.6	90.34	92.463	89.371	79.961	90.337	78.573	83.498	86.192	96.321	84.927
	81.16	96.334	86.189	74.41	91.063	79.645	81.974	92.576	94.545	95.209	65.259	87.225	90.051	86.611	76.31	91.378	91.714	83.876	81.706	89.632	92.699	90.949	82.465	85.589	91.513	81.233	91.746	90.542	89.389	93.768	83.924	90.633	89.84	89.847	90.182	90	91.909	76.91	92.6	90.34	92.463	89.371	79.961	90.337	78.573	83.498	86.192	96.321	84.927
	81.16	96.334	86.189	74.41	91.063	79.645	81.974	92.576	94.545	89.063	65.259	87.225	90.051	86.611	76.31	91.378	91.714	83.876	81.706	89.632	92.699	90.949	82.465	85.589	91.513	81.233	91.746	90.542	89.389	93.768	83.924	90.633	91.118	89.847	90.182	90	91.909	76.91	92.6	90.34	92.463	89.371	79.961	90.337	83.924	83.498	86.192	90.671	84.927
	81.16	96.334	86.189	74.41	91.063	79.645	81.974	92.576	94.545	89.063	65.259	87.225	90.051	86.611	76.31	91.378	92.324	83.876	81.706	89.632	92.699	90.949	82.465	85.589	91.513	81.233	91.746	90.542	89.389	93.768	83.924	90.633	91.118	89.847	90.182	90	91.909	76.91	92.6	90.34	92.463	89.371	79.961	90.337	83.924	83.498	86.192	90.671	83.457
	80.129	95.8	86.189	97.214	91.063	79.645	68.136	92.576	87.346	98.63	65.259	87.225	90.051	86.611	76.31	91.378	92.324	83.876	81.706	89.632	92.699	90.949	82.465	85.589	91.513	81.233	91.746	90.542	89.389	93.768	83.924	90.633	87.319	89.847	90.182	90	91.909	76.91	92.6	90.34	92.463	89.371	79.961	90.337	83.924	83.498	86.192	90.671	83.457
	80.129	95.8	86.189	97.214	91.063	79.645	68.136	92.576	87.346	98.63	65.259	87.225	90.051	86.611	76.31	91.378	92.324	83.876	81.706	89.632	84.751	90.949	82.465	85.589	91.513	81.233	91.746	90.542	89.389	93.768	83.924	90.633	87.319	89.847	90.182	90	91.909	76.91	92.6	90.34	92.463	89.371	79.961	90.337	83.924	83.498	86.192	85.225	90.037
	80.129	106.651	86.189	96.026	91.063	79.645	68.136	92.576	87.346	98.63	65.259	87.225	90.051	86.611	76.31	91.378	92.324	89.568	81.706	89.632	84.751	90.949	81.199	85.589	91.513	81.233	91.746	90.542	89.389	93.768	83.924	90.083	87.319	89.847	90.182	90	91.909	76.91	92.6	90.34	92.463	89.371	79.961	90.337	83.924	83.498	86.192	85.225	90.037
	80.129	95.345	86.189	96.026	91.063	79.645	68.136	92.576	87.346	98.63	65.259	87.225	83.409	86.611	76.31	91.378	92.401	89.568	81.706	89.632	84.751	90.949	81.199	85.589	91.513	81.233	91.746	90.542	89.389	93.768	83.924	90.083	87.319	89.847	90.182	90	91.909	76.91	92.6	90.34	92.463	89.371	79.961	90.337	83.924	83.498	86.192	85.225	90.037
	92.258	95.345	86.189	96.026	91.063	79.645	68.136	92.576	87.346	98.63	65.259	87.225	83.409	86.611	76.31	91.378	92.401	89.568	81.706	89.632	84.751	90.949	81.199	85.589	91.513	81.233	91.746	90.542	89.389	93.768	83.924	90.083	98.232	89.847	90.182	94.845	91.909	76.91	92.6	90.34	92.463	89.371	79.961	90.337	83.924	83.498	86.192	85.225	90.037
	92.258	95.345	86.189	96.026	91.063	72.581	68.136	92.576	87.691	98.63	65.259	87.225	83.409	86.611	76.31	90	92.401	89.568	81.706	89.632	84.751	90.949	81.199	85.589	91.513	81.233	91.746	94.922	89.389	93.768	83.924	90.083	98.232	89.847	94.803	94.845	90	76.91	92.6	90.34	92.463	89.371	79.961	90.337	83.924	83.498	86.192	90.752	90.037
	92.258	95.345	86.189	96.026	91.063	72.581	68.136	92.576	87.691	98.63	65.259	87.225	83.409	86.611	76.31	90	92.401	89.568	81.706	89.632	93.135	90.949	81.199	85.589	91.513	81.233	91.746	94.922	89.389	93.768	83.924	90.083	98.232	89.847	94.803	94.845	90	76.91	92.6	90.34	92.463	89.371	79.961	90.337	83.924	83.498	86.192	90.752	90.037
	92.258	95.345	86.189	96.026	91.063	72.581	68.136	79.645	87.691	98.63	84.475	85.188	83.409	86.611	76.31	90	94.668	89.568	81.706	89.632	93.135	90.949	81.199	85.589	91.513	81.233	91.746	94.922	89.389	93.768	83.924	90.083	89.989	89.847	94.803	94.845	90	76.91	92.6	90.34	92.463	89.371	79.961	90.337	83.924	83.498	86.192	62.556	89.982
	92.258	95.345	86.189	88.929	91.063	72.581	68.136	79.645	87.691	95.264	84.475	85.188	83.409	86.611	76.31	90	94.668	89.568	81.706	78.362	93.135	90.949	85.425	85.589	91.513	81.233	91.746	94.922	89.389	93.768	83.924	90.083	89.989	89.847	94.803	94.845	90	76.91	92.6	90.062	92.463	89.371	79.961	90.337	83.924	83.498	86.192	62.556	89.982
	92.258	95.345	86.189	88.929	91.063	72.581	68.136	79.645	87.691	95.264	84.475	93.432	83.409	86.611	76.31	90	94.668	89.568	81.706	78.362	93.135	90.949	85.425	85.589	91.513	81.233	91.746	94.922	89.389	93.768	83.924	90.083	89.989	89.847	94.803	78.697	90	76.91	92.6	90.062	92.463	89.371	79.961	90.337	83.924	83.498	86.192	86.954	89.982
	86.775	95.345	86.189	88.929	90.324	72.581	68.136	82.428	87.691	95.264	84.475	93.432	83.409	86.611	76.31	89.879	89.322	89.568	81.706	78.362	93.135	90.949	78.783	85.589	91.513	81.233	91.746	80.861	89.389	93.768	83.924	90.083	89.989	89.847	94.803	78.697	90	76.91	92.6	90.062	92.463	89.371	79.961	90.337	83.924	83.498	86.192	86.954	89.982
	86.775	95.345	86.189	88.929	90.324	72.581	68.136	82.428	78.986	95.264	84.475	93.432	83.409	86.611	76.31	89.879	89.322	89.568	81.706	103.273	93.135	90.949	78.783	85.589	91.513	81.233	91.746	80.861	89.389	93.768	83.924	90.083	89.989	89.847	94.803	78.697	90	76.91	92.6	90.062	92.463	89.371	79.961	90.337	83.924	83.498	86.192	86.954	89.95
	86.775	95.345	86.189	95.406	90.324	72.581	68.136	82.428	78.986	95.264	84.475	88.844	83.409	86.611	76.31	89.879	84.575	89.568	81.706	103.273	93.135	90.949	78.783	85.589	91.513	81.233	91.746	90	89.389	93.768	83.924	90.083	89.971	89.847	97.244	78.697	90	76.91	92.6	90.062	92.463	89.371	79.961	90.337	83.924	83.498	86.192	86.954	89.95
	86.775	95.345	86.189	95.406	90.324	72.581	68.136	82.428	78.986	95.264	84.475	88.844	83.409	86.611	76.31	89.879	84.575	89.568	81.706	103.273	93.135	90.949	78.783	85.589	91.513	81.233	91.746	90	89.389	93.768	83.924	90.083	89.971	89.847	97.244	95.188	90	76.91	92.6	90.062	92.463	89.371	79.961	90.337	83.924	83.498	86.192	86.954	89.95
	86.775	95.345	86.189	95.406	90.324	72.581	73.058	92.618	92.607	95.264	84.475	88.431	83.409	86.611	76.31	89.879	84.575	89.568	81.706	96.698	93.135	90.949	78.783	85.589	90.026	81.233	91.746	90	91.709	93.768	83.924	93.796	89.971	89.847	97.244	95.188	90	76.91	92.6	90.062	92.463	89.371	79.961	90.337	83.924	83.498	86.192	74.335	89.95
	86.775	95.345	86.189	95.406	90.324	72.581	73.058	92.618	92.607	95.264	84.475	88.431	83.409	86.611	76.31	89.879	84.575	89.568	81.706	96.698	93.135	90.949	78.783	85.589	90.026	81.233	91.746	90	91.709	93.768	83.924	93.796	89.971	89.847	97.244	95.188	90.603	76.91	92.6	90.062	92.463	89.371	79.961	90.337	83.924	83.498	86.192	74.335	89.901
	86.775	95.345	86.189	95.406	90.324	72.581	73.058	91.276	92.607	95.264	84.475	88.431	92.689	86.611	76.31	89.879	86.313	89.568	81.706	96.698	93.135	90.949	78.783	85.589	90.026	81.233	91.746	90	91.709	93.768	83.924	88.63	89.971	89.847	97.244	95.188	90.603	76.91	92.6	90.062	92.463	89.371	79.961	90.337	83.924	83.498	86.192	74.335	90.073
	86.775	95.345	86.189	95.406	90.324	74.525	73.058	91.276	93.399	95.264	84.475	88.431	92.689	86.611	80.772	89.879	86.313	84.293	81.706	85.439	93.135	90.949	78.783	85.589	90.026	81.233	91.746	90	91.709	93.768	83.924	88.63	89.971	89.847	97.244	86.345	90.603	76.91	92.6	90.062	92.463	89.371	79.961	90.337	83.924	83.498	86.192	74.335	90.073
	86.775	95.345	87.25	95.406	90.324	74.525	73.058	91.276	93.399	95.264	84.475	88.431	92.689	86.611	80.772	89.879	86.313	84.293	81.706	85.439	93.135	90.949	61.75	85.589	90.026	81.233	91.746	90	91.709	93.768	83.924	88.63	89.971	89.847	97.244	86.345	90.603	76.91	92.6	90.062	92.463	89.371	79.961	90.337	83.924	83.498	86.192	99.719	96.494
	86.775	95.345	87.25	95.406	87.188	74.525	75.616	91.276	93.399	95.264	84.475	88.431	101.658	86.611	80.772	89.879	86.313	84.293	81.706	85.439	93.135	90.949	61.75	97.869	90.026	81.233	91.746	90	91.709	93.768	83.924	82.655	89.971	89.847	90.719	86.345	76.998	76.91	92.6	90.062	92.463	89.371	79.961	90.337	96.512	83.498	86.192	99.719	96.494
	92.078	95.345	87.25	95.406	87.188	74.525	75.616	91.276	93.399	95.264	84.475	88.431	101.658	86.611	80.772	93.143	86.313	84.293	81.706	85.439	93.135	90.949	61.75	97.869	90.026	81.233	91.746	90	91.709	93.768	83.924	82.655	89.971	89.847	90.719	86.345	76.998	76.91	92.6	90.062	92.463	89.371	79.961	90.337	96.512	83.498	86.192	99.719	96.494
	92.078	95.345	103.947	89.627	87.188	74.525	75.616	91.276	93.399	95.264	84.475	90.39	101.658	86.611	80.772	93.143	94.611	84.293	81.706	85.439	93.135	90.949	61.75	97.869	90.026	81.233	91.746	90	91.709	93.768	83.924	82.655	89.971	89.847	75.073	86.345	76.998	76.91	92.6	90.062	92.463	89.371	79.961	90.337	96.512	83.498	86.192	99.719	96.494
	92.078	95.345	103.947	89.627	87.188	74.525	75.616	91.276	84.433	95.264	84.475	90.39	101.658	86.611	80.772	93.143	94.611	84.293	81.706	85.439	93.135	90.949	61.75	93.688	90.026	81.233	91.746	103.252	90	93.768	83.924	96.634	89.971	89.847	75.073	86.345	76.998	76.91	92.6	90.062	92.463	89.371	79.961	90.337	96.512	83.498	86.192	99.719	97.728
	92.078	95.345	103.947	89.627	87.188	74.525	75.616	91.276	84.433	95.264	84.475	90.39	78.928	86.611	79.708	93.143	94.611	84.293	81.706	85.439	93.135	90.949	61.75	93.688	90.026	81.233	91.746	103.252	90	93.768	83.924	96.634	89.971	89.847	75.073	86.345	76.998	76.91	92.6	89.114	92.463	89.371	79.961	90.337	96.512	83.498	86.192	99.719	97.728
	92.078	95.345	103.947	89.627	87.188	74.525	75.616	91.276	84.433	95.264	84.475	96.605	78.928	86.611	79.708	93.143	94.611	84.293	81.706	85.439	93.135	90.949	74.717	93.688	90.026	81.233	91.746	103.252	90	93.768	83.924	96.634	89.971	89.847	75.073	91.217	76.998	76.91	92.6	89.114	92.463	89.371	79.961	90.337	96.512	83.498	86.192	99.719	97.728
	92.078	95.345	103.947	89.627	87.188	97.597	75.616	91.276	84.433	95.264	84.475	96.605	78.928	86.611	79.708	93.143	93.244	84.293	81.706	85.439	93.135	90.949	74.717	93.688	90.026	81.233	91.746	103.252	90	93.768	83.924	96.634	89.971	89.847	75.073	91.217	94.159	76.91	92.6	89.114	92.463	89.371	79.961	90.337	82.397	83.498	86.192	99.719	77.646
	92.078	95.345	92.383	89.627	87.188	97.597	75.616	91.276	93.643	97.638	84.475	96.605	78.928	86.611	79.708	84.11	93.244	84.293	81.706	95.872	93.135	90.949	74.717	93.688	90.026	81.233	91.746	103.252	90	93.768	83.924	96.634	89.971	89.847	75.073	91.217	94.159	76.91	92.6	89.114	92.463	89.371	79.961	90.337	82.397	83.498	86.192	99.719	77.646
	92.078	95.345	92.383	89.627	87.188	87.843	75.616	91.276	93.643	97.638	84.475	85.531	78.928	86.611	79.708	84.11	89.279	84.293	81.706	95.872	93.135	90.949	74.717	93.688	90.026	81.233	91.746	103.252	90	93.768	83.924	96.634	89.971	89.847	75.073	91.217	96.022	76.91	92.6	89.114	92.463	89.371	79.961	90.337	82.397	83.498	86.192	99.719	77.646
	92.078	95.345	92.383	89.627	90.133	87.843	75.616	91.276	85.239	97.638	84.475	85.531	107.359	86.611	75.958	84.11	89.279	86.824	81.706	95.872	93.135	90.949	74.717	93.47	90.026	104.534	91.746	103.252	90	93.768	83.924	88.761	89.971	89.847	75.073	91.217	96.022	76.91	92.6	89.114	92.463	89.371	79.961	90.337	90.07	83.498	86.192	87.233	77.646
	92.078	95.345	92.383	89.627	90.133	87.843	75.616	91.276	85.239	97.638	84.475	85.531	107.359	86.611	75.958	96.726	89.279	86.824	81.706	95.872	93.135	90.949	74.717	93.47	90.026	104.534	91.746	103.252	90	93.768	83.924	88.761	89.971	89.847	75.073	91.217	96.022	76.91	92.6	89.114	92.463	89.371	79.961	90.337	90.07	83.498	86.192	87.233	90.54
	92.078	95.345	92.383	89.627	90.133	87.843	75.616	92.48	85.239	99.323	84.475	85.531	107.359	92.736	75.958	96.726	89.279	86.824	81.706	83.335	93.135	90.949	74.717	93.47	90.026	104.534	91.746	103.252	90	93.768	83.924	88.761	89.971	89.847	77.829	91.217	96.022	76.91	92.6	89.114	92.463	89.371	79.961	90.337	101.376	83.498	86.192	87.233	90.54
	92.078	95.345	92.383	89.627	90.133	87.843	75.616	92.48	85.239	99.323	84.475	85.531	107.707	92.736	75.958	96.726	89.279	86.824	81.706	83.335	93.135	90.949	74.717	93.47	90.026	104.534	91.746	89.139	90	93.768	83.924	88.761	89.971	89.847	77.829	91.217	96.022	76.91	92.6	89.114	92.463	89.371	79.961	90.337	101.376	83.498	86.192	87.233	90.54
	92.078	95.345	92.383	89.627	90.133	87.843	75.616	92.48	85.239	99.323	84.475	85.531	107.707	92.736	75.958	86.537	89.279	86.824	81.706	83.335	93.135	90.949	74.717	93.47	90.026	90.433	91.746	89.139	90	93.768	83.924	88.761	89.971	89.847	77.829	91.217	96.022	76.91	92.6	89.114	92.463	89.371	79.961	90.337	90	83.498	86.192	87.233	90.54
	92.078	95.345	92.383	89.627	90.133	87.843	75.616	95.842	85.239	99.323	84.475	90.932	77.873	92.736	75.958	86.537	89.279	86.824	81.706	81.53	93.135	90.949	74.717	93.47	90.026	90.433	91.746	89.139	90	93.768	83.924	88.761	89.971	89.847	77.829	91.217	96.022	76.91	92.6	89.114	92.463	89.371	79.961	90.337	90	83.498	86.192	87.233	90.54
	92.078	95.345	92.383	89.627	90.133	87.843	75.616	95.842	85.239	99.323	81.861	90.932	77.873	92.736	75.958	86.537	89.279	86.824	81.706	81.53	86.022	90.949	74.717	93.47	90.026	90.433	91.746	92.692	90	93.768	83.924	88.761	89.971	89.847	74.747	91.217	96.022	76.91	92.6	89.114	92.463	89.371	79.961	90.337	90	90.836	86.192	87.233	90.54
	92.078	95.345	92.383	89.627	90.133	87.843	75.616	95.842	85.239	99.323	81.861	90.932	77.873	92.736	75.958	86.537	89.279	86.824	81.706	81.53	86.022	90.949	74.717	82.797	90.026	90.433	91.746	92.692	90	93.768	83.924	88.761	89.971	89.847	74.747	91.217	96.022	67.891	92.6	89.114	92.463	89.371	79.961	90.337	90	90.836	86.192	94.305	90.54
	92.078	95.345	92.383	89.627	90.133	87.843	75.616	95.842	85.239	99.323	81.861	90.932	77.873	92.736	75.958	86.537	86.592	86.824	81.706	87.048	85.045	90.949	74.717	82.797	90.026	90.433	91.746	92.692	90	93.768	83.924	88.761	89.971	89.847	74.747	91.217	96.022	67.891	92.6	89.114	92.463	89.371	79.961	90.337	90	90.836	86.192	94.305	90.54
	92.078	95.345	92.383	89.627	90.133	87.843	75.616	95.842	85.239	99.323	81.861	90.932	77.873	92.736	75.958	86.537	86.592	86.824	81.706	87.048	85.045	90.949	74.717	82.797	90.026	90.433	91.746	92.692	90	93.768	83.924	88.761	89.971	89.847	74.747	91.217	96.022	67.891	92.6	89.114	92.463	89.371	79.961	90.337	90	90.836	86.192	92.836	90.54
	92.078	95.345	92.383	88.755	90.133	87.843	75.616	95.842	89.941	99.323	81.861	90.932	77.873	92.736	75.958	84.442	86.592	86.824	81.706	87.048	85.045	90.949	70.927	82.797	90.026	90.433	91.746	92.692	90	93.768	83.924	88.761	89.971	89.847	74.747	91.217	85.956	67.891	92.6	89.114	92.463	89.371	79.961	90.337	90	90.836	86.192	92.836	90.54
	92.078	95.345	92.383	88.755	90.133	87.843	75.616	89.62	89.941	99.323	81.861	90.932	77.873	92.736	82.635	84.442	86.592	86.824	81.706	87.048	85.045	90.949	70.927	82.797	90.026	90.433	91.746	92.692	90	93.768	83.924	90	89.971	89.847	74.747	91.217	85.956	67.891	92.6	89.114	92.463	89.371	79.961	90.337	90	90.836	86.192	92.836	90.54
	92.078	95.345	91.086	88.755	90.133	87.843	67.696	89.62	89.941	99.323	81.861	90.932	72.089	92.736	82.635	84.442	86.592	86.824	81.706	87.048	85.045	90.949	70.927	82.797	90.026	90.433	91.746	92.692	90	93.768	83.924	90	89.971	89.847	74.747	91.217	85.956	67.891	92.6	89.114	92.463	89.371	79.961	90.337	90	90.836	86.192	92.836	90.54
	92.078	90.655	91.086	83.569	90.133	87.843	67.696	82.273	89.941	99.323	81.861	90.932	72.089	92.736	82.635	84.442	86.592	86.824	81.706	87.048	85.045	90.949	70.927	83.019	90.026	90.433	91.746	92.692	90	93.768	83.924	90	89.971	89.847	74.747	91.217	85.956	67.891	92.6	89.114	92.463	89.371	79.961	90.337	90	90.836	86.192	92.836	90.54
	92.078	90.655	91.086	83.569	90.133	87.843	78.601	82.273	89.941	99.323	81.861	90.932	89.64	88.082	82.635	94.623	86.592	86.824	81.706	87.048	85.045	90.949	70.927	83.019	90.026	90.433	91.746	92.692	90	93.768	83.924	85.391	89.971	92.851	66.938	91.217	85.956	67.891	92.6	89.114	92.463	89.371	79.961	90.337	90	90.836	86.192	92.836	90.54
	92.078	90.655	91.086	83.569	90.133	87.843	78.601	82.273	89.941	99.323	81.861	90.932	89.64	88.082	82.635	94.623	86.592	86.824	81.706	87.048	85.045	90.949	70.927	85.077	90.026	90.433	91.746	92.692	90	93.768	83.924	85.391	89.971	92.851	66.938	91.217	85.956	77.189	92.6	89.114	92.463	89.371	79.961	90.337	90	90.836	86.192	92.836	90.54
	92.078	90.655	91.086	83.569	90.133	87.843	78.601	93.357	89.941	99.323	81.861	90.932	89.64	88.082	82.635	94.623	86.592	86.824	81.706	87.048	85.045	90.949	70.927	85.077	90.026	90.433	91.746	92.692	90	93.768	83.924	85.391	89.971	92.851	66.938	91.217	85.956	77.189	92.6	93.977	92.463	89.371	79.961	90.337	93.897	90.836	86.192	92.836	90.54
	92.078	90.655	91.086	83.569	90.871	87.843	78.601	93.357	89.941	99.323	81.861	90.932	89.64	88.082	82.635	94.623	86.592	86.824	81.706	98.616	85.045	90.949	59.411	87.395	90.026	90.433	91.746	92.692	90	93.768	83.924	85.391	89.971	92.851	74.668	87.025	85.956	77.189	92.6	93.977	92.463	89.371	79.961	90.337	93.897	90.836	86.192	92.836	90.54
	92.078	90.655	91.086	83.569	90.871	87.843	75.425	93.357	89.941	99.323	81.861	90.932	89.64	88.082	82.635	94.623	86.592	86.824	81.706	98.616	85.045	90.949	59.411	87.395	90.026	90.433	91.746	92.692	90	93.768	83.924	85.391	89.971	92.851	74.668	87.025	85.956	77.189	92.6	93.977	92.463	89.371	79.961	90.337	93.897	90.836	86.192	92.836	90.54
	92.078	90.655	91.086	91.667	90.871	87.843	75.425	93.357	89.941	99.323	81.861	77.791	89.64	88.082	82.635	94.623	86.592	86.824	81.706	98.616	85.045	90.949	59.411	91.594	90.026	90.433	91.746	92.692	90	93.768	83.924	85.391	89.971	92.851	74.668	83.42	85.956	77.189	92.6	93.977	92.463	89.371	79.961	90.337	93.897	90.836	86.192	92.836	90.54
	92.078	90.655	91.086	91.667	90.871	87.843	75.425	91.299	89.941	99.323	81.861	77.791	89.64	88.082	82.635	94.623	95.857	86.824	81.706	101.228	85.045	90.949	59.411	91.594	90.026	90.213	91.746	92.692	90	93.768	83.924	85.391	89.971	92.851	69.772	83.42	85.956	77.189	99.177	93.977	92.463	89.371	79.961	90.337	93.897	90.836	86.192	92.836	90.54
	92.078	90.655	91.086	91.667	90.871	87.843	75.425	91.299	89.941	99.323	81.861	77.791	89.64	88.082	82.635	85.277	95.857	86.824	81.706	101.228	85.045	90.949	59.411	91.594	92.444	90.213	91.746	92.692	90	93.768	83.924	85.391	89.971	92.851	69.772	83.42	85.956	77.189	99.177	93.977	92.463	89.371	79.961	90.337	93.897	90.836	86.192	88.632	90.54
	92.078	90.655	91.086	91.667	90.871	87.843	75.425	91.299	89.941	99.323	80.202	77.791	89.64	88.082	82.635	85.277	95.282	86.824	81.706	101.228	85.045	90.949	59.411	91.594	92.444	90.213	91.746	92.692	90	93.768	83.924	85.391	89.971	92.851	69.772	84.433	85.956	77.189	93.149	93.977	92.463	89.371	79.961	90.337	93.897	90.836	86.192	88.632	90.54
	92.078	90.655	95.213	91.667	90.871	74.977	75.425	91.299	89.941	99.323	80.202	77.791	106.922	88.082	82.635	85.277	95.282	86.824	81.706	101.228	85.045	90.949	59.411	91.594	84.546	90.213	91.746	92.692	90	93.768	83.924	85.391	89.971	92.851	82.219	84.433	85.956	77.189	93.149	93.977	92.463	89.371	79.961	90.337	93.897	90.836	86.192	88.632	90.54
	92.078	90.655	95.213	91.667	90.871	74.977	75.425	91.299	89.941	99.323	80.202	77.791	106.922	88.082	82.635	85.277	95.282	86.824	81.706	101.228	85.045	90.949	59.411	91.594	84.546	90.213	91.746	92.692	90	89.989	83.924	92.336	89.971	92.851	82.219	84.433	99.325	77.189	93.149	93.977	92.463	89.371	79.961	90.337	93.897	90.836	86.192	88.632	90.54
	92.078	90.655	95.213	91.667	90.871	74.977	75.425	91.299	89.941	99.323	80.202	93.743	106.922	88.082	80.595	91.729	95.282	86.824	81.706	101.228	85.045	90.949	71.796	91.594	84.311	90.213	91.746	92.692	90	89.989	83.924	92.336	89.971	92.851	82.219	84.433	99.325	77.189	93.149	93.977	92.463	89.371	79.961	90.337	93.897	90.836	86.192	88.632	90.54
	92.078	90.655	95.801	91.667	90.871	74.977	75.425	91.299	89.941	99.323	83.37	93.743	106.922	88.082	80.595	91.729	79.616	86.824	81.706	101.228	85.045	90.949	71.796	91.594	84.311	90.213	91.746	92.692	90	101.149	83.924	92.336	89.971	92.851	82.219	84.433	99.325	81.248	94.207	93.977	92.463	89.371	79.961	90.337	93.897	90.836	86.192	88.632	90.54
	92.078	90.655	95.801	91.667	90.871	74.977	75.425	83.192	89.941	99.323	83.37	93.743	106.922	88.082	80.595	91.729	79.616	86.824	81.706	101.228	85.045	90.949	63.763	91.594	84.311	90.213	91.746	92.692	90	101.149	83.924	92.336	89.971	92.851	82.219	90.997	99.325	81.248	94.207	93.977	92.463	89.371	79.961	90.337	89.628	90.836	86.192	88.632	90.54
	92.078	90.655	95.801	91.667	90.871	74.977	75.425	83.192	89.941	99.323	83.37	93.743	106.922	88.082	80.595	91.729	79.616	86.824	81.706	101.228	85.045	90.949	63.763	91.594	84.311	90.213	91.746	84.471	90	101.149	83.924	92.336	89.971	93.327	82.219	90.997	99.325	81.248	94.207	93.977	92.463	89.371	79.961	90.337	89.628	90.836	86.192	88.632	90.54
	92.078	90.655	95.801	91.667	90.871	74.977	75.425	83.192	89.941	99.323	83.37	93.743	75.385	88.082	80.595	91.729	79.616	86.824	81.706	101.228	85.045	90.949	63.763	91.594	84.311	90.213	91.746	84.471	90	101.149	83.924	92.336	89.971	93.327	82.219	90.997	99.325	81.248	94.207	93.977	92.463	89.371	79.961	90.337	89.628	90.836	86.192	88.632	90.54
	92.078	90.655	95.801	91.667	90.871	74.977	75.425	83.192	89.941	99.323	83.37	93.743	75.385	88.082	80.595	90.093	80.572	86.824	81.706	93.219	85.045	90.949	63.763	91.594	84.311	90.213	91.746	84.471	90	101.149	83.924	92.336	89.971	93.327	72.97	90.997	99.325	81.248	94.207	93.977	92.463	89.371	79.961	90.337	89.628	90.836	86.192	88.632	90.54
	92.078	90.655	95.801	91.667	90.871	74.977	75.425	83.192	89.941	99.323	83.37	93.743	75.385	88.082	80.595	90.093	80.572	86.824	81.706	93.219	85.045	90.949	63.763	91.594	84.311	90.213	91.746	84.471	90	101.149	83.924	92.336	89.971	93.327	72.97	90.997	99.325	81.248	94.207	93.977	92.463	89.371	79.961	90.337	89.628	79.629	86.192	88.632	90.54
	92.078	90.655	95.801	88.302	90.871	74.977	75.425	90.957	89.941	99.323	83.37	93.743	75.385	88.082	80.595	90.093	80.572	86.824	81.706	93.219	85.045	90.949	63.763	91.594	84.311	90.213	91.746	84.471	90	101.149	83.924	91.103	89.971	93.327	72.97	90.997	81.372	81.248	94.207	93.977	92.463	89.371	79.961	90.337	89.628	79.629	86.192	88.632	90.54
	92.078	90.655	95.801	88.302	90.871	74.977	75.425	90.957	89.941	99.323	83.37	93.743	92.917	88.082	80.595	90.093	95.486	86.824	81.706	93.219	85.045	90.949	63.763	91.594	84.311	90.213	91.746	84.471	90	101.149	83.924	91.103	89.971	93.327	72.97	90.997	81.372	81.248	94.207	93.977	92.463	89.371	79.961	90.337	89.628	79.629	86.192	88.632	90.54
	92.078	90.655	95.801	88.302	90.871	74.977	73.516	90.957	89.941	99.323	83.37	93.743	92.917	88.082	80.595	90.093	95.486	86.824	81.706	96.047	85.045	90.949	63.763	91.594	84.311	90.213	91.746	84.471	90	81.759	83.924	91.103	89.971	93.327	72.97	90.997	87.496	81.248	94.207	93.977	92.463	89.371	79.961	90.337	89.628	79.629	86.192	88.632	90.54
	92.078	90.655	97.645	88.302	90.871	74.977	73.516	90.957	89.941	99.323	83.37	93.743	92.917	88.082	80.595	90.093	95.486	86.824	81.706	96.047	85.045	90.949	63.763	91.594	84.311	90.213	91.746	84.471	92.036	81.759	83.924	91.103	89.971	93.327	80.701	90.997	87.496	81.248	94.207	93.977	92.463	89.371	79.961	90.337	89.628	79.629	86.192	88.632	90.54
	92.078	90.655	97.645	88.302	90.871	74.977	73.516	90.957	89.941	99.323	83.37	95.289	80.403	88.082	80.595	90.093	95.486	86.824	81.706	96.047	85.045	90.949	63.763	91.594	84.311	90.213	91.746	84.471	92.036	81.759	83.924	91.103	89.971	93.327	80.701	90.997	87.496	81.248	94.207	93.977	92.463	89.371	79.961	90.337	89.628	79.629	86.192	88.632	90.54
	92.078	90.655	97.645	87.804	90.871	74.977	73.516	90.957	89.941	99.323	83.37	95.289	80.403	88.082	80.595	90.093	95.486	86.824	81.706	96.047	85.045	90.949	63.763	91.594	84.311	90.213	91.746	84.471	92.036	81.759	83.924	91.103	89.971	93.327	80.701	90.997	87.496	81.248	94.207	93.977	92.463	89.371	79.961	90.337	89.628	79.629	86.192	88.632	90.54
	92.078	90.655	97.645	87.804	90.871	74.977	73.516	90.957	89.941	99.323	83.37	95.289	80.403	88.082	80.595	90	95.375	86.824	81.706	96.047	85.045	90.949	63.763	91.594	84.311	90.213	91.746	84.471	92.036	81.759	83.924	91.103	89.971	93.327	80.701	90.997	87.496	81.248	94.207	93.977	90	89.371	79.961	90.337	89.628	79.629	86.192	87.928	90.54
	92.078	105.231	93.656	87.804	90.871	74.977	73.516	90.957	89.941	99.323	83.37	100.128	80.403	88.082	80.595	90	95.375	86.824	81.706	96.047	85.045	90.949	63.763	91.594	84.311	90.213	91.746	84.471	92.036	81.759	83.924	91.103	89.971	93.327	80.701	90.997	87.496	81.248	94.207	93.977	90	89.371	79.961	90.337	89.628	79.629	86.192	87.928	90.54
	92.078	105.231	93.656	87.804	90.871	74.977	73.516	90.957	89.941	99.323	83.37	100.128	80.403	88.082	80.595	90	95.375	86.824	81.706	96.047	85.045	90.949	63.763	91.594	84.311	90.213	91.746	84.471	92.036	81.759	83.924	91.103	89.971	93.327	80.701	90.997	87.496	81.248	94.207	93.977	90	89.371	79.961	90.337	89.628	79.629	86.192	87.928	90.54
	92.078	90.772	93.656	87.804	90.871	74.977	73.516	90.957	89.941	99.323	83.37	100.128	80.403	88.082	80.595	90	95.375	86.824	81.706	96.047	85.045	90.949	63.763	91.594	84.311	90.213	91.746	84.471	92.036	81.759	83.924	91.103	89.971	93.327	80.701	90.997	87.496	84.466	94.207	93.977	90	89.371	79.961	90.337	89.628	79.629	86.192	87.928	90.54
	92.078	90.772	93.656	87.804	90.871	74.977	73.516	90.957	89.941	99.323	83.37	91.952	80.403	88.082	80.595	90	95.375	86.824	81.706	96.047	85.045	90.949	63.763	91.594	84.311	90.213	91.746	84.471	92.036	81.759	83.924	91.103	89.971	93.327	80.701	90.997	87.496	84.466	94.207	93.977	90.027	89.371	79.961	90.337	89.628	79.629	86.192	87.928	90.54
	92.078	90.772	93.656	92.542	90.029	74.977	55.743	90.957	89.941	99.323	86.292	91.952	80.403	88.082	80.595	90	89.594	86.824	81.706	96.047	85.045	92.847	63.763	91.594	84.311	90.213	91.746	84.471	92.036	81.759	83.924	91.103	89.971	93.327	78.522	90.997	94.51	84.466	94.207	93.977	90.027	89.371	79.961	90.337	89.628	79.629	86.192	87.928	90.54
	92.078	90.772	93.656	92.542	90.029	74.977	55.743	90.957	89.941	99.323	86.292	91.952	80.403	88.082	80.595	90	89.594	86.824	81.706	79.534	85.045	92.847	63.763	91.594	84.311	90.213	91.746	84.137	92.036	81.759	83.924	91.103	89.971	93.327	78.522	90.997	94.51	84.466	94.207	93.977	90.027	89.371	79.961	90.337	89.628	72.492	86.192	87.928	90.54
	92.078	90.772	93.656	92.542	90.029	74.977	55.743	90.957	89.941	99.323	86.292	91.952	80.403	88.082	80.595	90	89.594	86.824	81.706	79.534	85.045	92.847	63.763	91.594	76.984	90.213	91.746	84.137	92.036	81.759	83.924	91.103	89.971	93.327	78.522	90.997	94.51	84.466	94.207	93.977	90.027	89.371	79.961	90.337	89.628	72.492	86.192	87.928	90.54
	75.26	90.772	93.656	92.542	90.029	74.977	78.298	90.957	89.941	99.323	86.292	91.952	80.403	88.082	80.595	90	89.594	86.824	81.706	79.534	85.045	89.021	63.763	91.594	77.205	90.213	91.746	84.137	92.036	81.759	83.924	91.103	89.971	93.327	78.522	90.997	94.51	79.762	94.207	93.977	90.027	89.371	79.961	90.337	89.628	72.492	86.192	87.928	90.54
	75.26	96.809	93.656	92.542	90.029	74.977	78.298	90.957	89.941	99.323	94.481	91.952	80.403	88.082	80.595	90	89.594	86.824	81.706	79.534	85.045	89.021	63.763	91.594	77.205	90.213	91.746	84.137	92.036	81.759	83.924	91.103	89.971	93.327	78.522	90.997	94.51	79.762	94.207	93.977	90.027	89.371	79.961	90.337	89.628	72.492	86.192	87.928	90.54
	75.26	96.809	96.508	86.822	90.029	74.977	78.298	90.957	89.941	99.323	94.481	91.952	80.403	88.082	80.595	90	89.594	86.824	81.706	82.782	85.045	89.021	63.763	91.594	93.068	90.213	91.746	84.137	92.036	81.759	87.319	91.103	89.971	93.327	78.522	90.997	92.669	79.762	94.207	93.977	90.027	89.371	79.961	90.337	89.628	72.492	86.192	87.928	90.54
	75.26	96.809	96.508	86.822	90.029	74.977	78.298	90.957	89.941	99.323	94.481	91.952	80.403	88.082	80.595	101.716	89.594	86.824	81.706	82.782	85.045	89.021	63.763	90	93.068	90.213	91.746	85.225	92.036	81.759	87.319	91.103	89.971	93.327	78.522	90.997	92.669	79.762	94.207	93.977	90.027	89.371	79.961	90.337	89.628	72.492	86.192	92.524	90.54
	75.26	96.809	96.508	86.822	90.029	74.977	78.298	90.957	89.941	99.323	94.481	90.749	80.403	88.082	80.595	101.716	89.594	86.824	81.706	82.782	85.045	89.021	72.747	90	93.068	90.213	91.746	85.225	92.036	81.759	87.319	91.103	89.971	93.327	78.522	90.997	92.669	79.762	94.207	93.977	90.027	89.371	79.961	90.337	89.628	72.492	86.192	92.524	90.54
	82.348	96.809	96.508	86.822	90.029	74.977	78.298	90.957	89.941	99.323	89.582	90.749	80.403	88.082	80.595	101.716	89.594	86.824	81.706	82.782	85.045	89.021	72.747	90	92.269	90.213	91.746	85.225	92.036	81.759	87.319	91.103	89.971	93.327	78.522	90.997	92.669	79.762	94.207	93.977	90.027	89.371	79.961	90.337	89.628	72.492	86.192	92.524	90.54
	82.348	96.809	96.508	87.824	90.029	74.977	78.298	90.957	92.04	99.323	89.582	90.749	80.403	88.082	80.595	80.675	89.594	86.824	81.706	82.782	85.045	89.021	72.747	90	92.269	90.213	91.746	85.225	92.036	98.078	87.319	91.103	89.971	93.327	78.522	90.997	92.669	79.762	94.207	93.977	90.027	89.371	79.961	90.337	89.628	72.492	86.192	92.524	90.54
	82.348	90.923	96.508	87.824	90.029	74.977	78.298	90.957	92.04	99.323	89.582	90.749	80.403	88.082	80.595	80.675	89.594	86.824	81.706	82.782	85.045	89.021	82.228	90	93.884	90.213	91.746	85.225	92.036	98.078	87.319	91.103	89.971	93.327	78.522	90.997	92.669	79.762	94.207	93.977	90.027	89.371	79.961	90.337	89.628	72.492	86.192	92.524	90.54
	82.348	90.923	96.508	87.824	90.029	74.977	78.298	90.957	92.04	99.323	89.582	90.749	79.386	88.082	80.595	80.675	89.594	86.824	81.706	82.782	85.045	89.021	82.228	90	93.884	90.213	91.746	85.225	92.036	98.078	87.319	91.103	89.971	93.327	82.777	90.997	92.669	79.762	94.207	93.977	90.027	89.371	79.961	90.337	89.628	72.492	86.192	91.271	90.54
	80.047	90.923	96.508	87.824	90.029	74.977	78.298	90.957	92.04	99.323	89.582	93.99	79.386	88.082	80.595	80.675	89.594	86.824	81.706	82.782	85.045	89.021	82.228	90.602	93.884	90.213	91.746	85.225	92.036	98.078	87.319	91.103	89.971	93.327	82.777	90.997	92.669	79.762	94.207	93.977	90.027	89.371	79.961	90.337	89.628	72.492	86.192	91.271	90.54
	80.047	90.923	96.508	87.824	90.029	74.977	78.298	90.957	92.04	99.323	89.582	93.99	79.386	88.082	80.595	80.675	89.594	86.824	81.706	82.782	85.045	89.021	82.228	90.602	90	90.213	91.746	85.225	92.036	98.078	87.319	91.103	89.971	93.327	82.777	90.997	92.669	79.762	94.207	93.977	90.027	89.371	79.961	90.337	89.628	72.492	86.192	91.271	90.54
	80.047	90.923	94.214	87.824	81.275	74.977	78.298	90.957	92.04	99.323	89.582	93.99	116.121	88.082	80.595	92.88	89.594	86.824	81.706	82.782	85.045	89.021	71.273	90.602	90	90.213	91.746	85.225	92.036	100.521	87.319	91.103	89.971	93.327	82.777	90.997	92.669	79.762	94.207	93.977	90.027	89.371	79.961	90.337	89.628	72.492	86.192	91.271	84.148
	80.047	90.923	94.214	87.824	81.275	74.977	67.057	90.957	92.04	99.323	89.582	93.99	116.121	88.082	80.595	92.88	89.594	86.824	81.706	82.782	85.045	89.021	71.273	89.76	90	90.213	91.746	85.225	92.036	100.521	87.319	91.103	89.971	93.327	82.777	90.997	92.669	79.762	94.207	93.977	90.027	89.371	79.961	90.337	89.628	72.492	86.192	91.271	84.148
	80.047	90.923	94.214	87.824	102.475	74.977	67.057	90.957	92.04	99.323	89.582	93.99	116.121	88.082	80.595	92.88	89.594	86.824	81.706	82.782	85.045	89.021	71.273	89.76	90	90.213	91.746	85.225	92.036	100.521	87.319	91.103	89.971	93.327	82.777	90.997	92.669	79.762	94.207	93.977	90.027	89.371	79.961	90.337	89.628	72.492	86.192	91.271	84.148
	80.047	90.923	94.214	87.824	102.475	74.977	70.979	90.957	92.04	99.323	89.582	93.99	116.121	88.082	80.595	92.88	89.594	86.824	81.706	96.405	85.045	89.021	71.273	89.76	90	90.213	91.746	85.225	92.036	100.521	87.319	91.103	89.971	93.327	79.079	90.997	90.409	79.762	94.207	93.977	90.027	89.371	79.961	90.337	89.628	72.492	86.192	91.271	88.589
	85.884	91.487	94.214	87.824	102.475	74.977	70.979	90.957	92.04	99.323	89.582	93.99	104.699	88.082	80.595	90	89.594	86.824	81.706	96.405	85.045	89.021	71.273	89.76	90	90.213	91.746	97.639	92.036	100.521	87.319	91.103	89.971	93.327	79.079	90.997	90.409	79.762	94.207	93.977	90.027	89.371	79.961	90.337	89.628	81.02	86.192	91.271	88.589
	85.884	91.487	94.214	87.824	98.618	74.977	70.979	90.957	92.04	99.323	89.582	93.99	104.699	88.082	80.595	90	89.594	86.824	81.706	75.882	85.045	89.021	71.273	89.76	84.39	90.213	91.746	97.639	92.036	100.521	87.319	91.103	89.971	93.327	79.079	90.997	90.409	79.762	94.207	93.977	90.027	89.371	79.961	90.337	89.628	81.02	86.192	90	88.589
	85.884	91.487	94.214	87.824	98.618	74.977	70.979	90.957	92.04	99.323	89.582	90.366	104.699	88.082	80.595	93.758	89.594	86.824	81.706	75.882	85.045	89.021	71.273	89.76	84.39	90.213	91.746	97.639	92.036	100.521	87.319	91.103	89.971	93.327	79.079	90.997	90.409	79.762	94.207	93.977	90.027	89.371	79.961	90.337	89.628	81.02	86.192	90	88.589
	82.08	91.487	94.214	87.824	98.618	74.977	70.979	90.957	92.04	99.323	89.582	90.366	104.699	88.082	80.595	93.758	89.594	86.824	81.706	100.751	85.045	89.021	62.171	89.76	84.39	90.213	83.573	97.639	92.036	100.521	87.319	91.103	89.971	93.327	79.079	90.997	90.409	79.762	94.207	93.977	90.027	89.371	79.961	90.337	89.628	81.02	86.192	90	88.589
	82.08	91.487	95.815	87.824	103.881	74.977	70.979	90.957	92.04	99.323	89.582	99.923	104.699	82.23	80.595	93.758	90.111	86.824	81.706	100.751	85.045	89.021	62.171	89.76	85.591	90.213	83.573	97.639	92.036	100.521	87.319	91.103	89.971	93.327	79.079	90.997	90.409	79.762	94.207	90.987	90.027	89.371	79.961	90.337	89.628	81.02	86.192	90	88.589
	82.08	96.323	95.815	87.824	87.285	74.977	70.979	90.957	92.04	99.323	89.582	99.923	104.699	82.23	80.595	88.122	90.111	86.824	81.706	100.751	85.045	89.021	67.439	89.76	85.591	90.213	83.573	97.639	92.036	100.521	87.319	91.103	89.971	93.327	79.079	90.997	90.409	79.762	94.207	90.987	90.027	89.371	79.961	90.337	89.628	81.02	86.192	86.505	88.589
	82.08	96.323	95.258	87.824	87.285	74.977	70.979	90.957	92.04	99.323	89.582	99.923	104.699	82.23	80.595	88.122	90.111	86.824	81.706	86.828	85.045	89.021	67.439	89.76	85.591	90.213	83.573	97.639	92.036	100.521	87.319	91.103	89.971	93.327	79.079	90.997	90.409	79.762	94.207	90.987	90.027	89.371	79.961	90.337	89.628	81.02	86.192	86.505	88.589
	82.08	96.323	95.258	85.487	87.285	74.977	70.979	90.957	92.04	99.323	89.582	99.923	104.699	82.23	80.595	88.122	90.111	86.824	81.706	86.828	85.045	89.021	67.439	89.76	85.591	90.213	83.573	88.587	92.036	100.521	87.319	91.103	89.971	93.327	79.079	90.997	90.409	79.762	94.207	90.987	90.027	89.371	79.961	90.337	89.628	81.02	86.192	86.505	88.589
	82.08	96.323	95.258	85.487	87.285	74.977	70.979	90.957	92.04	99.323	89.582	99.923	104.699	82.23	80.595	88.122	90.111	86.824	81.706	86.828	85.045	89.021	67.439	89.76	85.591	90.213	83.573	88.587	92.036	100.521	87.319	91.103	89.971	93.327	79.079	90.997	90.409	79.762	94.207	90.987	90.027	89.371	79.961	90.337	89.628	81.02	86.192	99.004	97.901
	82.08	96.323	95.258	84.106	87.285	74.977	70.979	94.93	93.396	98.716	89.582	99.923	104.699	82.23	80.595	88.122	90.111	86.824	81.706	86.828	85.045	89.021	67.439	89.76	83.154	90.213	83.573	88.587	92.036	100.521	87.319	91.103	89.971	93.327	79.079	90.997	90.409	79.762	94.207	90.987	90.027	89.371	79.961	90.337	89.628	81.02	86.192	99.004	97.901
	82.08	96.323	93.491	84.106	87.285	74.977	70.979	94.93	93.396	98.716	89.582	99.923	104.699	82.23	80.595	88.122	90.111	86.824	81.706	86.828	85.045	89.021	67.439	89.76	83.154	90.213	83.573	88.587	92.036	100.521	87.319	91.103	89.971	93.327	79.079	90.997	90.409	79.762	94.207	90.987	90.027	89.371	79.961	90.337	89.628	81.02	86.192	99.004	97.901
	82.08	96.323	93.491	84.106	87.285	74.977	70.979	94.93	93.396	98.716	89.582	99.923	104.699	82.23	80.595	91.483	90.111	86.824	81.706	86.828	85.045	89.021	67.439	89.76	102.154	94.547	83.573	88.587	92.036	88.238	87.319	91.103	89.971	93.327	79.079	90.997	90.409	79.762	94.207	90.987	90.027	89.371	79.961	90.337	89.628	81.02	86.192	99.004	97.901
	82.08	96.323	98.092	84.106	87.285	74.977	70.979	94.93	93.396	98.716	86.607	99.923	89.12	82.23	80.595	91.483	90.111	86.824	81.706	86.828	85.045	89.021	67.439	89.76	102.154	94.547	83.573	88.587	92.036	88.238	87.319	91.103	89.971	93.327	79.079	90.997	90.409	79.762	94.207	90.987	90.027	89.371	79.961	90.337	89.628	81.02	86.192	99.004	97.901
	82.08	96.323	98.092	84.106	87.285	74.977	70.979	94.93	93.396	98.716	86.607	99.923	89.12	82.23	80.595	91.483	90.111	86.824	81.706	86.828	85.045	89.021	67.439	89.76	102.154	94.547	83.573	88.587	92.036	88.238	87.182	91.103	89.971	93.327	79.079	90.997	90.409	79.762	94.207	90.987	90.027	89.371	79.961	90.337	89.628	81.02	86.192	99.004	97.901
	82.08	96.323	107.38	84.106	87.285	74.977	70.979	87.866	93.396	98.716	86.607	99.923	89.12	82.23	80.595	91.483	93.896	86.824	81.706	86.828	85.045	89.021	67.439	89.76	102.154	94.547	83.573	88.587	92.036	88.238	87.182	91.103	89.971	93.327	79.079	90.997	90.409	79.762	94.207	90.987	90.027	89.371	79.961	90.337	89.628	81.02	86.192	99.004	97.901
	82.08	96.323	107.38	84.106	87.285	74.977	70.979	87.866	93.396	98.716	86.607	99.923	89.12	82.23	80.595	89.497	93.896	86.824	81.706	86.828	85.045	89.021	66.922	89.76	102.154	94.547	83.573	88.587	92.036	88.238	87.182	91.103	89.971	93.327	79.079	90.997	90.409	79.762	94.207	90.987	90.027	89.371	79.961	90.337	89.628	81.02	86.192	82.509	83.895
	82.08	96.323	107.38	84.106	87.285	74.977	70.979	87.866	86.701	98.716	86.607	99.923	89.12	82.23	80.595	89.497	93.896	86.824	81.706	86.828	85.045	89.021	66.922	89.76	102.154	94.547	83.573	88.587	92.036	88.238	87.182	91.103	89.971	93.327	79.079	90.997	90.409	79.762	94.207	90.987	90.027	89.371	79.961	90.337	89.628	81.02	86.192	82.509	83.895
	82.08	96.323	107.38	84.106	87.285	74.977	70.979	87.866	86.701	98.716	86.607	99.923	86.367	82.23	80.595	89.497	93.896	86.824	81.706	86.828	85.045	89.021	66.922	89.76	80.002	94.547	83.573	88.587	92.036	88.238	87.182	91.103	89.971	93.327	79.079	90.997	90.409	79.762	94.207	90.987	90.027	89.371	79.961	90.337	89.628	81.02	86.192	82.509	83.895
	82.08	96.323	107.38	84.106	87.285	74.977	70.979	87.866	86.701	98.716	86.607	99.923	86.367	82.23	80.595	89.497	93.896	86.824	81.706	86.828	85.045	89.021	66.922	89.76	80.002	99.024	83.573	88.587	92.036	88.238	87.182	91.103	89.971	93.327	79.079	90.997	90.409	79.762	94.207	90.987	90.027	89.371	79.961	90.337	89.628	81.02	86.192	82.509	83.895
	82.08	96.323	107.38	84.106	87.285	74.977	70.979	87.866	86.701	98.716	86.607	99.923	86.367	82.23	80.595	89.497	93.896	86.824	81.706	86.828	85.045	89.021	73.616	89.76	96.737	99.024	83.573	88.587	92.036	88.238	87.182	91.103	89.971	93.327	79.079	90.997	90.409	79.762	94.207	90.987	90.027	89.371	79.961	90.337	89.628	81.02	86.192	82.509	83.895
	82.08	96.323	68.24	84.106	87.285	74.977	70.979	87.866	86.701	98.716	86.607	99.923	86.367	82.23	80.595	89.497	93.896	86.824	81.706	86.828	85.045	84.741	73.616	89.76	96.737	99.024	83.573	88.587	92.036	88.238	87.182	91.103	89.971	93.327	79.079	90.997	90.409	79.762	94.207	90.987	90.027	89.371	79.961	90.337	89.628	81.02	86.192	82.509	83.895
	82.08	96.323	68.24	92.243	87.285	74.977	70.979	82.301	90.405	98.716	86.607	99.923	86.367	82.23	80.595	89.497	93.896	86.824	81.706	90	85.045	84.741	73.616	91.983	97.066	99.024	83.573	88.587	92.036	88.238	87.182	91.103	89.971	93.327	79.079	90.997	90.409	79.762	94.207	90.987	90.027	89.371	79.961	90.337	89.628	81.02	86.192	82.509	83.895
	82.08	96.323	68.24	92.243	87.285	74.977	70.979	82.301	90.405	98.716	90.121	99.923	86.367	82.23	80.595	89.497	79.067	86.824	81.706	90	85.045	84.741	77.871	91.983	97.066	99.024	83.573	88.587	92.036	88.238	87.182	91.103	89.971	93.327	79.079	90.997	90.409	79.762	94.207	90.987	90.027	89.371	79.961	90.337	89.628	81.02	86.192	89.533	87.504
	82.08	96.323	68.24	92.243	87.285	74.977	70.979	82.301	90.405	98.716	90.121	99.923	86.367	82.23	80.595	89.497	79.067	86.824	81.706	90	85.045	84.741	77.871	90.554	97.066	99.024	80.438	88.587	92.036	88.238	87.182	91.103	89.971	93.327	79.079	90.997	90.409	79.762	94.207	90.987	90.027	89.371	79.961	90.337	89.628	81.02	86.192	89.533	87.504
	82.08	96.323	68.24	92.243	87.285	74.977	73.931	82.301	90.405	98.716	90.121	99.923	86.367	82.23	80.595	89.497	91.035	86.824	81.706	90	85.045	84.741	77.871	90.554	97.066	77.54	80.438	88.587	92.036	88.238	87.182	91.103	89.971	93.327	79.079	90.997	90.409	79.762	94.207	90.987	90.027	89.371	79.961	90.337	89.628	81.02	86.192	89.533	87.504
	66.966	96.323	68.24	92.243	87.285	74.977	73.931	82.301	90.405	98.716	90.121	99.923	86.367	82.23	80.595	89.497	91.035	86.824	81.706	90	85.045	84.741	55.133	90.554	85.554	77.54	80.438	88.587	92.036	88.238	87.182	91.103	89.971	93.327	79.079	90.997	90.409	79.762	94.207	90.987	90.027	89.371	79.961	90.337	89.628	81.02	86.192	89.533	87.504
	102.415	96.323	68.24	87.722	87.285	74.977	73.931	82.301	90.405	98.716	90.121	99.923	93.85	82.23	80.595	89.497	91.035	86.824	81.706	90	85.045	90.09	55.133	88.053	85.554	77.54	80.438	88.587	92.036	88.238	87.182	91.103	89.971	93.327	79.079	90.997	90.409	79.762	94.207	90.987	90.027	89.371	79.961	90.337	89.628	81.02	86.192	89.533	87.504
	102.415	96.323	68.24	87.722	87.285	74.977	73.931	90	90.405	98.716	90.121	99.923	93.85	82.23	80.595	89.497	91.035	86.824	81.706	94.514	85.045	90.09	82.955	88.053	83.49	77.54	78.48	88.587	92.036	88.238	87.182	91.103	89.971	93.327	79.079	90.997	90.409	79.762	94.207	90.987	90.027	89.371	79.961	90.337	89.628	81.02	86.192	89.533	92.349
	102.415	96.323	68.24	87.722	87.285	74.977	73.931	90	90.405	98.716	90.121	99.923	93.85	82.23	80.595	89.497	91.035	86.824	81.706	94.514	85.045	90.09	82.955	88.053	83.49	77.54	78.48	88.587	92.036	88.238	87.182	91.103	89.971	93.327	79.079	90.997	90.409	79.762	94.207	90.987	90.027	89.371	79.961	90.337	89.628	81.02	86.192	89.533	92.349
	102.415	96.323	68.24	87.722	87.285	74.977	73.931	90	90.405	98.716	90.121	99.923	93.85	82.23	80.595	89.497	91.035	86.824	81.706	94.514	85.045	90.09	82.955	88.053	83.49	77.54	78.48	88.587	92.036	88.238	87.182	91.103	89.971	93.327	79.079	90.997	90.409	79.762	94.207	90.987	90.027	89.371	79.961	90.337	89.628	81.02	86.192	89.533	92.349
	102.415	96.323	68.24	87.722	87.285	74.977	73.931	90	90.405	98.716	90.121	99.923	84.11	82.23	80.595	89.497	91.035	86.824	81.706	94.514	85.045	90.09	84.722	91.021	83.49	77.54	81.722	88.587	92.036	88.238	87.182	91.103	89.971	93.327	79.079	90.997	90.409	79.762	94.207	90.987	90.027	89.371	79.961	90.337	89.628	81.02	86.192	89.533	92.349
	102.415	96.323	62.792	87.722	87.285	74.977	73.931	90	99.737	98.716	84.18	99.923	84.11	82.23	80.595	89.497	91.035	86.824	81.706	94.514	85.045	90.09	84.722	91.021	83.49	77.54	81.722	88.587	92.036	88.238	87.182	91.103	89.971	93.327	79.079	90.997	90.409	79.762	94.207	90.987	90.027	89.371	79.961	90.337	89.628	81.02	86.192	89.533	92.349
	102.415	96.323	62.792	87.722	87.285	74.977	73.931	90	99.737	98.716	84.18	99.923	84.11	82.23	80.595	89.497	91.035	86.824	81.706	94.514	88.925	90.09	84.722	91.021	83.49	77.54	75.45	88.587	92.036	88.238	87.182	91.103	89.971	93.327	79.079	90.997	90.409	79.762	94.207	90.987	89.547	89.371	79.961	90.337	89.628	81.02	86.192	89.533	92.349
	102.415	96.323	62.792	87.722	87.285	74.977	73.931	90	99.737	98.716	84.18	99.923	91.327	82.23	80.595	89.497	91.035	86.824	81.706	94.514	88.925	90.09	84.722	91.021	92.075	77.54	75.45	88.587	92.036	88.238	87.182	91.103	89.971	93.327	79.079	90.997	90.409	79.762	94.207	90.987	89.547	89.371	80.247	90.337	89.628	81.02	86.192	89.533	92.349
	84.159	96.323	62.792	87.722	91.77	74.977	73.931	89.798	88.652	98.716	84.18	99.923	91.327	82.23	80.595	89.497	91.035	86.824	81.706	94.514	88.925	90.09	84.722	91.021	92.075	77.54	75.45	88.587	92.036	88.238	87.182	91.103	89.971	93.327	79.079	90.997	90.409	79.762	94.207	90.987	89.547	89.371	80.247	90.337	89.628	81.02	86.192	89.533	92.349
	84.159	96.323	62.792	82.46	91.77	74.977	73.931	89.798	88.652	98.716	84.18	99.923	91.327	82.23	80.595	89.497	91.035	86.824	81.706	94.514	88.925	105.158	84.722	91.021	92.075	77.54	75.45	88.587	92.036	88.238	87.182	91.103	89.971	93.327	79.079	90.997	90.409	79.762	94.207	90.987	85.994	89.371	80.247	90.337	89.628	81.02	86.192	89.533	92.349
	88.505	96.323	62.074	82.46	91.77	74.977	73.931	89.798	88.652	98.716	84.18	99.923	91.327	82.23	80.595	89.497	91.035	86.824	81.706	94.514	88.925	105.158	84.722	90	89.585	77.54	75.45	88.587	92.036	88.238	87.182	91.103	89.971	93.327	79.079	90.997	90.409	79.762	94.207	90.987	85.994	89.371	80.247	90.337	89.628	81.02	86.192	89.533	92.349
	88.505	96.323	62.074	95.993	91.77	74.977	73.931	89.798	89.904	98.716	84.18	99.923	91.327	82.23	80.595	89.497	91.035	86.824	81.706	94.514	88.925	105.158	84.722	90	89.585	77.54	75.45	88.587	92.036	93.673	87.182	91.103	89.971	93.327	79.079	90.997	90.409	79.762	94.207	90.987	85.994	89.371	80.247	90.337	89.628	81.02	86.192	89.533	92.349
	94.946	96.323	60.069	95.993	91.77	74.977	73.931	89.798	89.904	98.716	85.746	99.923	91.327	82.23	80.595	89.497	91.035	86.824	81.706	94.514	88.925	105.158	84.722	90	89.585	77.54	75.45	88.587	92.036	93.673	87.182	91.103	89.971	93.327	79.079	90.997	90.409	79.762	94.207	88.654	85.994	89.371	80.247	90.337	89.628	81.02	86.192	89.533	92.349
	94.946	96.323	60.069	95.993	91.77	74.977	73.931	89.798	89.904	98.716	85.746	99.923	91.327	82.23	80.595	89.497	91.035	86.824	81.706	94.514	88.925	105.158	84.722	90	89.585	77.54	75.45	88.587	92.036	93.673	87.182	91.103	89.971	91.364	79.079	90.997	90.409	79.762	94.207	88.654	85.994	89.371	80.247	90.337	89.628	81.02	86.192	89.533	92.349
	94.946	96.323	72.306	95.993	91.77	74.977	73.931	89.798	89.904	98.716	85.746	99.923	91.327	82.23	80.595	89.497	91.035	86.824	81.706	94.514	88.925	105.158	84.722	90	89.585	77.54	75.45	88.587	92.036	93.673	87.182	91.103	89.971	91.364	79.079	90.997	90.409	79.762	94.207	88.654	85.994	89.371	80.247	90.337	89.628	81.02	86.192	89.533	92.349
	94.946	96.323	72.306	95.993	91.77	74.977	73.931	89.798	89.904	98.716	85.746	99.923	91.327	82.23	80.595	89.497	91.035	86.824	81.706	94.514	88.925	105.158	84.722	90	89.585	77.54	75.45	88.587	92.036	93.673	87.182	91.103	89.971	91.364	79.079	90.997	90.409	79.762	94.207	88.654	85.994	89.371	80.247	90.337	89.628	81.02	86.192	89.533	92.349
	94.946	96.323	72.306	95.993	91.77	74.977	73.931	89.798	89.904	98.716	85.746	99.857	91.327	82.23	80.595	89.497	91.035	86.824	81.706	94.514	88.925	105.158	84.722	81.436	89.585	77.54	77.263	88.587	92.036	93.673	87.182	91.103	89.971	102.939	79.079	90.997	90.409	79.762	94.207	88.654	85.994	89.371	80.247	90.337	89.628	81.02	86.192	89.533	92.349
	94.946	96.323	72.306	95.993	91.77	74.977	73.931	89.798	89.904	98.716	85.746	99.857	91.327	82.23	80.595	89.497	91.035	86.824	81.706	94.514	88.925	105.158	84.722	81.436	89.585	77.54	77.263	88.587	92.036	93.673	80.299	91.103	89.971	102.939	79.079	90.997	90.409	79.762	94.207	88.654	85.994	89.371	80.247	90.337	89.628	81.02	86.192	89.533	92.349
	94.946	96.323	72.306	95.993	91.77	74.977	73.931	89.798	89.904	98.716	85.746	99.857	91.327	82.23	80.595	89.497	91.035	86.824	81.706	94.514	88.925	105.158	84.722	81.436	89.585	77.54	77.263	88.587	92.036	93.673	80.299	91.103	89.971	104.69	79.079	90.997	90.409	79.762	94.207	88.654	85.994	89.371	80.247	90.337	89.628	81.02	86.192	89.533	92.349
	94.946	96.323	72.306	95.993	89.227	74.977	73.931	89.798	89.904	98.716	85.746	99.857	91.327	82.23	80.595	89.497	79.905	86.824	81.706	94.514	88.925	105.158	84.722	81.436	89.585	77.54	77.263	88.587	92.036	93.673	80.299	91.103	89.971	104.69	79.079	90.997	90.409	79.762	94.207	88.654	110.447	89.371	80.247	90.337	89.628	86.09	86.192	89.533	92.349
	94.946	96.323	65.512	95.993	89.227	74.977	73.931	89.798	89.904	98.716	85.746	99.857	91.327	82.23	80.595	89.497	79.905	86.824	81.706	94.514	88.925	105.158	84.722	81.436	89.585	77.54	77.263	88.587	92.036	93.673	84.133	91.103	89.971	104.69	79.079	90.997	90.409	79.762	94.207	88.654	110.447	89.371	80.247	90.337	89.628	86.09	86.192	89.533	92.349
	94.946	96.323	65.512	101.887	89.227	74.977	73.931	89.798	89.904	98.716	85.746	99.857	91.327	82.23	80.595	89.497	79.905	86.824	81.706	86.529	88.925	105.158	84.722	81.436	89.585	77.54	77.263	92.953	92.036	93.673	84.133	91.103	89.971	104.69	79.079	90.997	90.409	79.762	94.207	86.815	100.882	89.371	80.247	90.337	89.628	86.09	86.192	89.533	92.349
	94.946	96.323	65.512	101.887	89.227	74.977	73.931	89.798	89.904	98.716	85.746	99.857	91.327	82.23	80.595	89.497	79.905	86.824	81.706	86.529	88.925	105.158	84.722	81.436	89.585	77.54	77.263	92.953	92.036	93.673	84.133	91.103	89.971	104.69	79.079	90.997	90.409	79.762	94.207	86.815	100.882	89.371	80.247	90.337	89.628	86.09	86.192	89.533	92.349
	94.946	96.323	65.512	101.887	89.227	74.977	73.931	89.798	89.904	98.716	85.746	99.857	91.327	82.23	80.595	89.497	79.905	86.824	81.706	86.529	88.925	105.158	84.722	81.436	89.585	77.54	77.263	92.953	92.766	93.673	84.133	91.103	89.971	104.69	79.079	90.997	90.409	79.762	94.207	86.815	100.882	89.371	80.247	90.337	89.628	86.09	86.192	89.533	92.349
	94.946	96.323	65.512	101.887	89.227	74.977	73.931	89.798	89.904	98.716	85.746	99.857	91.327	82.23	80.595	89.497	79.905	86.824	81.706	86.529	88.925	105.158	84.722	81.436	89.585	77.54	61.657	92.953	92.766	93.673	84.133	91.103	89.971	104.69	79.079	90.997	90.409	79.762	94.207	86.815	77.323	89.371	80.247	90.337	89.628	86.09	86.192	89.533	80.599
	87	96.323	65.512	101.887	89.227	74.977	73.931	89.798	78.072	98.716	85.746	99.857	91.327	82.23	80.595	89.497	98.862	86.824	81.706	86.529	88.925	105.158	84.722	81.436	89.585	77.54	61.657	92.953	92.766	93.673	84.133	91.103	89.971	104.69	79.079	90.997	90.409	79.762	94.207	86.815	77.323	89.371	80.247	90.337	89.628	86.09	86.192	89.533	80.599
	87	96.323	65.512	101.887	89.227	74.977	73.931	89.798	78.072	98.716	85.746	99.857	91.327	82.23	80.595	89.497	98.862	86.824	81.706	86.529	88.925	105.158	84.722	81.436	89.585	77.54	61.657	91.238	92.766	93.673	84.133	91.103	89.971	104.69	79.079	90.997	90.409	79.762	94.207	86.815	77.323	89.371	80.247	90.337	89.628	86.09	86.192	89.533	102.98
	87	96.323	65.512	94.069	89.227	74.977	73.931	89.798	88.688	90.318	85.746	82.473	91.327	82.23	80.595	89.497	98.862	86.824	81.706	86.529	88.925	105.158	84.722	81.436	89.585	77.54	61.657	91.238	92.766	93.673	84.133	91.103	89.971	104.69	79.079	90.997	90.409	79.762	94.207	86.815	77.323	89.371	80.247	90.337	89.628	86.09	86.192	89.533	102.98
	87	96.323	65.512	94.069	89.227	74.977	73.931	89.798	88.688	90.318	85.746	82.473	91.327	82.23	80.595	89.497	91.206	86.824	81.706	86.529	88.925	105.158	84.722	81.436	89.585	77.54	61.657	91.238	83.297	93.673	84.133	91.103	89.971	104.69	79.079	90.997	90.409	79.762	94.207	86.815	77.323	89.371	80.247	90.337	89.628	86.09	86.192	89.533	102.98
	87	96.323	65.512	77.56	89.227	74.977	73.931	89.798	88.688	90.318	85.746	82.473	91.327	82.23	80.595	89.497	91.206	86.824	81.706	86.529	88.925	93.963	84.722	81.436	89.585	77.54	61.657	91.238	83.297	93.673	84.133	91.103	89.971	104.69	79.079	90.997	90.409	79.762	94.207	86.815	77.323	89.371	78.446	90.337	89.628	86.09	86.192	89.533	94.86
	87	96.323	65.512	77.56	89.227	74.977	73.931	88.76	88.688	90.318	85.746	82.473	91.327	82.23	80.595	89.497	91.206	86.824	81.706	86.529	88.925	93.963	84.722	81.436	89.585	77.54	61.657	91.238	83.75	93.673	84.133	91.103	89.971	97.426	79.079	90.997	90.409	79.762	94.207	86.815	77.323	89.371	78.446	90.337	89.628	86.09	86.192	89.533	94.86
	87	96.323	65.512	86.144	89.227	74.977	73.931	88.76	88.688	90.318	85.746	113.161	91.327	82.23	80.595	89.497	91.206	86.824	81.706	86.529	88.925	93.963	84.722	81.436	89.585	77.54	61.657	91.238	83.75	93.673	84.133	91.103	89.971	97.426	79.079	90.997	90.409	79.762	94.207	86.815	77.323	89.371	78.446	90.337	89.628	86.09	86.192	89.533	94.86
	86.52	96.323	65.512	86.144	89.227	74.977	73.931	85.257	91.312	90.318	85.746	113.161	91.327	82.23	80.595	89.497	91.206	86.824	81.706	86.529	88.925	93.963	84.722	81.436	89.585	77.54	61.657	80.471	83.75	93.673	84.133	91.103	89.971	108.658	79.079	90.997	90.409	79.762	94.207	86.815	77.323	89.371	78.446	90.337	89.628	86.09	86.192	89.533	94.86
	86.52	96.323	65.512	86.144	89.227	74.977	73.931	85.257	91.312	90.318	85.746	99.393	91.327	82.23	80.595	89.497	91.206	86.824	81.706	86.529	88.925	93.963	84.722	81.436	89.585	77.54	61.657	80.471	83.75	93.673	84.133	91.103	89.971	108.658	79.079	90.997	90.409	79.762	94.207	86.815	77.323	89.371	78.446	90.337	89.628	86.09	86.192	89.533	94.86
	86.52	96.323	65.512	86.144	89.227	74.977	73.931	85.257	91.312	90.318	85.746	99.393	91.327	82.23	80.595	89.497	91.206	86.824	81.706	86.529	88.925	93.963	84.722	81.436	89.585	77.54	61.657	100.247	83.75	93.673	84.133	91.103	89.971	108.658	79.079	90.997	90.409	79.762	94.207	86.815	95.474	89.371	84.41	90.337	89.628	86.09	86.192	88.443	94.86
	86.52	96.323	65.512	86.144	89.227	74.977	73.931	85.257	91.312	90.318	85.746	99.393	91.327	82.23	80.595	89.497	91.206	86.824	81.706	86.529	88.925	93.963	84.722	81.436	89.585	77.54	61.657	100.247	83.75	93.673	84.133	91.103	89.971	83.015	79.079	90.997	90.409	79.762	94.207	86.815	95.474	89.371	84.41	90.463	89.628	86.09	86.192	88.443	94.86
	86.52	96.323	65.512	86.144	89.227	74.977	73.931	85.257	91.312	90.318	85.746	99.393	91.327	82.23	80.595	89.497	91.206	86.824	81.706	86.529	88.925	93.963	84.722	81.436	89.585	77.54	61.657	87.378	83.75	93.673	84.133	91.103	89.971	83.015	79.079	92.542	90.409	79.762	94.207	86.815	95.474	89.371	84.41	90.463	89.628	86.09	83.427	88.443	85.349
	86.52	96.323	65.512	86.144	89.227	74.977	73.931	85.257	86.851	90.318	85.746	90.516	91.327	82.23	74.588	89.497	91.206	86.824	81.706	86.529	88.925	93.963	84.722	81.436	89.585	77.54	61.657	87.378	83.75	93.673	84.133	91.103	89.971	83.015	79.079	92.542	90.409	79.762	94.207	86.815	95.474	89.371	84.41	90.463	89.628	86.09	83.427	88.443	85.349
	86.52	96.323	65.512	86.144	89.227	74.977	73.931	85.257	86.851	90.318	85.746	90.516	91.327	82.23	74.588	89.497	91.206	86.824	81.706	86.529	89.712	93.963	84.722	81.436	89.585	77.54	61.657	82.406	86.691	93.673	84.133	91.103	89.971	83.015	79.079	92.542	90.409	79.762	94.207	86.815	95.474	89.371	84.41	90.463	89.628	86.09	83.427	88.443	85.349
	86.52	96.323	65.512	86.144	89.227	74.977	73.931	85.257	84.593	90.318	85.746	90.516	91.327	82.23	74.588	89.497	91.206	86.824	81.706	86.529	89.712	93.963	84.722	81.436	92.824	77.54	61.657	82.406	86.691	93.673	84.133	91.103	89.971	83.015	79.079	92.542	90.409	79.762	94.207	86.815	95.474	89.371	84.41	90.463	89.628	86.09	83.427	88.443	85.349
	86.52	96.323	65.512	86.144	89.227	74.977	73.931	85.257	84.593	90.318	85.746	90.516	91.327	82.23	74.588	89.497	91.206	86.824	81.706	86.529	89.712	93.963	84.722	81.436	92.824	77.54	61.657	90.915	86.691	93.673	84.133	91.103	89.971	83.015	79.079	92.542	90.409	79.762	94.207	86.815	95.474	89.371	84.41	90.463	89.628	86.09	83.427	88.443	85.349
	89.307	96.323	65.512	86.144	89.227	74.977	73.931	85.257	84.593	90.318	85.746	90.516	91.327	82.23	74.588	89.497	91.206	91.666	81.706	86.529	101.842	93.963	84.722	81.436	92.824	77.54	76.393	90.915	86.691	93.673	84.133	91.103	89.971	83.015	79.079	92.542	90.409	79.762	94.207	86.815	95.474	89.371	84.41	90.463	89.628	86.09	83.427	88.443	93.634
	89.307	96.323	60.768	88.089	89.227	74.977	73.931	85.257	84.593	100.166	85.746	90.516	83.503	82.23	74.588	89.497	91.206	91.666	81.706	86.529	101.842	93.963	84.722	81.436	92.824	77.54	76.393	90.915	86.691	93.673	84.133	91.103	89.971	83.015	79.079	92.542	90.409	79.762	94.207	86.815	95.474	89.371	84.41	90.463	89.628	86.09	83.427	86.174	93.634
	89.307	96.323	60.768	88.089	95.345	74.977	73.931	85.257	84.593	100.166	85.746	90.516	83.503	82.23	87.141	89.497	91.206	91.666	81.706	86.529	101.842	93.963	84.722	81.436	92.824	77.54	76.393	90.915	86.691	93.673	84.133	91.103	89.971	83.015	79.079	92.542	90.409	79.762	94.207	86.815	95.474	89.371	84.41	90.463	89.628	86.09	83.427	86.174	93.634
	89.307	96.323	60.768	88.089	95.345	74.977	73.931	85.257	84.525	100.166	85.746	90.516	83.503	82.23	87.141	89.497	91.206	92.379	81.706	86.529	82.858	93.963	84.722	81.436	92.824	77.54	76.393	88.301	86.691	93.673	84.133	91.103	89.971	83.015	79.079	92.542	90.409	79.762	94.207	86.815	102.988	89.371	84.41	90.463	89.628	86.09	83.427	86.174	93.634
	89.307	96.323	67.711	88.089	95.345	74.977	73.931	103.835	84.525	100.166	85.746	90.516	83.503	82.23	87.141	89.497	91.206	92.379	81.706	86.529	82.858	93.963	84.722	81.436	92.824	77.54	76.393	88.301	86.691	93.673	84.133	91.103	89.971	89.511	79.079	92.542	90.409	79.762	94.207	86.815	102.988	89.371	84.41	90.463	89.628	86.09	83.427	87.056	93.634
	89.307	96.323	67.711	88.089	95.345	74.977	73.931	103.835	84.525	100.166	85.746	92.036	91.846	82.23	87.141	89.497	91.206	92.379	81.706	86.529	82.858	93.963	84.722	81.436	92.824	77.54	76.393	88.301	86.691	71.053	84.133	91.103	89.971	89.511	79.079	86.167	90.409	79.762	94.207	86.815	102.988	89.371	84.41	90.463	89.628	86.09	83.427	87.056	72.595
	89.307	96.323	67.019	88.089	95.345	74.885	73.931	103.835	84.525	100.166	85.746	92.036	91.846	82.23	87.141	89.497	91.206	92.379	81.706	85.644	82.858	93.963	84.722	81.436	92.824	77.54	76.393	88.301	86.691	71.053	84.133	91.103	89.971	89.511	79.079	86.167	90.409	79.762	94.207	86.815	88.478	89.371	84.41	90.463	89.628	86.09	83.427	87.056	72.595
	89.307	96.323	67.019	88.089	95.345	74.885	73.931	103.835	84.525	100.166	85.746	93.929	91.846	82.23	87.141	89.497	91.206	92.379	81.706	85.644	82.858	93.963	84.722	81.436	92.824	77.54	76.393	88.301	86.691	71.053	84.133	91.103	89.971	89.511	79.079	86.167	90.409	79.762	94.207	86.815	88.478	89.371	84.41	90.463	89.628	86.09	83.427	87.056	72.595
	89.307	96.323	67.019	88.089	76.398	74.885	73.931	103.835	105.339	100.166	85.746	93.929	91.66	82.23	87.141	89.497	91.206	92.379	81.706	85.644	82.858	93.963	84.722	81.436	92.824	77.54	76.393	88.301	86.691	94.993	84.133	91.103	89.971	89.511	79.079	86.167	90.409	79.762	94.207	86.815	88.478	89.371	84.41	90.463	89.628	86.09	83.427	87.056	72.595
	89.307	96.323	67.019	88.089	90	74.885	73.931	101.159	105.339	100.166	85.746	93.929	91.66	82.23	87.141	89.497	91.206	92.379	81.706	85.644	82.858	93.963	84.722	81.436	92.824	77.54	76.393	88.301	86.691	94.993	84.133	91.103	89.971	89.511	79.079	86.167	90.409	79.762	94.207	86.815	88.478	89.371	84.41	90.463	89.628	86.09	83.427	92.333	72.595
	89.307	96.323	67.019	88.089	90	74.885	73.931	101.159	105.339	100.166	85.746	93.929	91.66	82.23	87.141	89.497	91.206	92.379	81.706	85.644	110.638	93.963	84.722	81.436	92.824	77.54	76.393	88.301	86.691	94.993	84.133	91.103	89.971	84.203	79.079	87.995	92.451	79.762	94.207	86.815	88.478	89.371	84.41	90.463	89.628	86.09	83.427	92.333	72.595
	89.307	96.323	67.019	88.089	90	74.885	73.931	101.159	105.339	100.166	85.746	93.929	91.66	82.23	74.825	89.497	91.206	92.379	81.706	85.644	110.638	93.963	84.722	81.436	92.824	77.54	76.393	88.301	86.691	99.509	84.133	91.103	89.971	84.203	79.079	87.995	92.451	79.762	94.207	86.815	88.478	89.371	84.41	90.463	89.628	86.09	83.427	92.333	72.595
	89.307	96.323	67.019	88.089	90	74.885	73.931	101.159	90	100.166	85.746	93.929	91.66	82.23	74.825	89.497	91.206	92.379	81.706	86.584	86.571	93.963	84.722	81.436	92.824	77.54	76.393	88.301	86.691	99.509	84.133	91.103	89.971	84.203	79.079	87.995	92.451	79.762	94.207	86.815	88.478	89.371	84.41	90.463	89.628	86.09	83.427	92.333	84.233
	89.307	96.323	67.019	88.089	90	74.885	73.931	101.159	90	100.166	85.746	93.929	91.66	82.23	74.825	89.497	91.206	92.379	81.706	86.584	86.571	93.963	84.722	81.436	92.824	77.54	76.393	88.301	86.691	99.509	84.133	91.103	89.971	84.203	79.079	87.995	92.451	79.762	94.207	86.815	88.478	89.371	84.41	90.463	89.628	86.09	83.427	92.333	84.233
	89.307	96.323	67.019	97.009	90	74.885	73.931	82.293	90	97.45	85.746	93.929	91.66	82.23	74.825	89.497	91.206	92.379	81.706	86.584	87.017	93.963	84.722	81.436	92.824	77.54	76.393	88.301	86.691	99.509	84.133	91.103	89.971	84.203	79.079	87.995	92.451	79.762	94.207	86.815	88.478	89.371	84.41	90.463	90	86.09	85.543	92.333	84.233
	89.307	96.323	67.019	97.009	88.976	74.885	73.931	82.293	90	97.45	85.746	93.929	91.66	82.23	79.559	89.497	85.408	92.379	81.706	86.584	87.017	90.696	84.722	81.436	92.824	77.54	76.393	92.197	86.691	99.509	84.133	91.103	89.971	84.203	79.079	87.995	92.451	79.762	94.207	86.815	88.478	89.371	84.41	90.463	90	86.09	85.543	92.333	84.233
	89.307	96.727	67.019	97.009	88.976	74.885	73.931	82.293	90	97.45	85.746	93.929	88.64	82.23	79.559	89.497	85.408	92.379	81.706	86.584	87.017	90.696	84.722	82.076	92.824	77.54	76.393	92.197	86.691	99.509	84.133	91.103	89.971	84.203	79.079	87.995	92.451	79.762	94.207	86.815	88.478	89.371	84.41	90.463	90	86.09	72.082	92.333	84.233
	89.307	96.727	67.019	97.009	91.463	74.885	73.931	90.324	90	97.45	85.746	93.929	88.64	82.23	79.559	89.497	85.408	92.379	81.706	86.584	87.017	90.696	84.722	82.076	92.824	77.54	76.393	92.197	86.691	99.509	87.637	91.103	89.971	84.203	79.079	87.995	92.451	79.762	94.207	86.815	88.478	89.371	84.41	90.463	90	86.09	72.082	92.333	84.233
	89.307	96.727	67.019	97.009	91.463	74.885	73.931	90.324	90	97.45	85.746	93.929	88.64	82.23	79.559	89.497	98.349	92.379	81.706	86.584	87.017	90.696	84.722	82.076	92.824	77.54	76.393	92.197	86.691	112.938	87.637	91.103	89.971	84.203	79.079	87.995	92.451	79.762	94.207	86.815	88.478	89.371	84.41	90.463	90	86.09	72.082	92.333	84.233
	89.307	96.727	67.019	97.009	91.463	74.885	73.931	90.324	90	97.45	85.746	93.929	88.64	82.23	79.559	89.497	98.349	92.379	81.706	86.584	87.017	90.696	84.722	82.076	92.824	77.54	80.545	92.197	86.691	112.938	87.637	91.103	89.971	84.203	79.079	87.995	92.451	79.762	94.207	86.815	88.478	89.371	84.41	90.463	90	86.09	72.082	92.333	84.233
	89.307	96.727	67.019	97.009	91.463	74.885	73.931	90.324	86.486	97.45	85.746	102.609	88.64	82.23	83.419	89.497	98.349	92.379	81.706	86.584	87.017	90.696	84.722	82.076	98.488	77.54	80.545	92.197	86.691	112.938	87.637	91.103	89.971	84.203	79.079	87.995	92.451	79.762	94.207	86.815	88.478	93.112	84.41	90.463	93.527	86.09	72.082	92.333	84.233
	89.307	96.727	67.019	97.009	91.463	74.885	73.931	90.324	86.486	97.45	85.746	102.609	88.64	82.23	83.419	89.497	78.405	92.379	81.706	92.752	87.017	90.696	84.722	82.076	98.488	77.54	80.545	92.197	86.691	89.12	87.637	91.103	89.971	84.203	79.079	87.995	92.451	77.777	94.207	86.815	88.478	93.112	84.41	90.463	93.527	86.09	72.082	92.333	84.233
	89.307	96.727	67.019	88.167	91.463	74.885	73.931	90.324	86.486	97.45	85.746	102.609	92.72	82.23	83.419	86.651	78.405	92.379	81.706	92.752	87.017	90.696	84.722	82.076	98.488	77.54	80.545	92.197	86.691	89.12	87.637	91.103	89.971	84.203	79.079	87.995	92.451	77.777	94.207	86.815	88.478	93.112	84.41	90.463	93.527	86.09	72.082	92.333	87.325
	89.307	96.727	67.019	88.167	91.463	74.885	73.931	87.854	84.225	97.45	85.746	102.609	92.72	82.23	83.419	86.651	78.405	92.379	81.706	92.752	87.017	90.696	84.722	82.076	98.488	77.54	80.545	92.197	86.691	89.12	87.637	91.103	89.971	84.203	79.079	87.995	92.451	77.777	94.207	86.815	88.478	93.112	84.41	90.463	90.901	86.09	72.082	92.333	87.325
	89.307	96.727	67.019	84.197	91.463	74.885	73.931	87.854	84.225	97.45	85.746	102.609	92.72	82.23	83.419	86.651	78.405	92.379	81.706	92.752	87.017	90.696	84.722	82.076	98.488	77.54	80.545	92.197	86.691	89.12	87.637	91.103	89.971	84.203	79.079	87.995	92.108	77.777	94.207	86.815	88.478	93.112	84.41	90.463	90.901	86.09	72.082	92.333	87.325
	89.307	96.727	67.019	84.197	91.463	74.885	73.931	87.854	84.225	97.45	85.746	82.656	78.135	82.23	83.419	90.965	78.405	92.379	81.706	92.752	87.017	90.696	84.722	82.076	98.488	77.54	80.545	92.197	86.691	89.12	87.637	91.103	89.971	84.203	79.079	87.995	92.108	77.777	94.207	86.815	88.478	93.112	84.41	90.463	90.901	86.09	72.082	92.333	87.325
	89.307	96.727	67.019	84.197	91.463	74.885	73.931	87.854	84.225	97.45	85.746	82.656	78.135	82.23	83.419	90.965	78.405	92.379	81.706	92.752	87.017	90.696	84.722	82.076	90.949	77.54	80.545	92.197	86.691	89.12	87.637	91.103	89.971	84.203	79.079	87.995	92.108	77.777	94.207	86.815	88.478	93.112	84.41	90.463	90.901	86.09	72.082	92.333	87.325
	89.307	96.727	67.019	78.26	92.269	88.967	73.931	87.854	84.225	97.45	87.433	82.656	83.566	90.728	83.419	90.965	78.405	92.379	81.706	92.752	87.017	90.696	84.722	82.076	90.949	77.54	80.545	92.197	86.691	89.12	87.637	91.103	89.971	84.203	79.079	87.995	92.108	77.777	94.207	86.815	88.478	93.112	84.41	90.463	90.901	86.09	72.082	92.333	87.325
	96.613	96.727	67.019	78.26	92.269	88.967	73.931	87.854	84.225	97.45	87.433	82.656	83.566	90.728	83.419	85.406	78.405	92.379	81.706	92.752	87.017	90.696	84.722	82.076	90.949	77.54	76.408	92.197	86.691	93.01	87.637	91.103	89.971	84.203	79.199	87.995	92.108	63.903	94.207	86.815	88.478	93.112	84.41	90.463	90.901	86.09	72.082	92.333	87.325
	96.613	96.727	67.019	78.26	92.269	88.967	73.931	87.854	84.225	97.45	87.433	82.656	83.566	90.728	83.419	85.406	78.405	92.379	81.706	92.752	97.922	90.696	84.722	82.076	90.949	77.54	76.408	92.197	91.305	93.01	87.637	91.103	89.971	84.203	79.199	87.995	92.108	63.903	94.207	86.815	88.478	79.301	84.41	90.463	90.901	86.09	72.082	92.333	87.325
	96.613	96.727	67.019	78.26	92.269	88.967	73.931	87.854	84.225	97.45	87.433	82.656	83.566	90.728	83.419	94.765	78.405	92.379	81.706	92.752	97.922	90.696	84.722	82.076	90.949	77.54	76.408	92.197	91.305	93.01	87.637	91.103	89.971	84.203	79.199	87.995	92.108	63.903	94.207	86.815	88.478	79.301	84.41	90.463	90.901	86.09	72.082	92.333	87.325
	96.613	96.727	67.019	78.26	92.269	88.967	73.931	87.854	102.354	97.45	87.433	82.656	83.566	90.728	83.419	94.765	88.672	92.379	81.706	92.752	97.922	90.696	84.722	82.076	90.949	77.54	76.408	92.197	90	93.01	87.637	91.103	89.971	84.203	79.199	87.995	92.108	63.903	94.207	86.815	88.478	79.301	84.41	90.463	90.901	77.895	72.082	92.333	87.325
	96.613	96.727	67.019	78.26	84.009	88.967	73.931	87.854	102.354	97.45	87.433	82.656	83.566	90.728	83.419	94.765	88.672	92.379	81.706	92.752	97.922	90.696	84.722	82.076	90.949	77.54	76.408	92.197	90	93.01	87.637	91.103	89.971	84.203	79.199	87.995	92.108	63.903	94.207	86.815	88.478	79.301	84.41	90.463	90.901	77.895	72.082	92.333	97.23
	96.613	96.727	67.019	78.26	84.009	88.967	73.931	87.854	97.92	97.45	87.433	82.656	83.566	90.728	83.419	94.765	88.672	92.379	81.706	92.752	97.922	90.696	84.722	82.076	90.949	77.54	76.408	92.197	90	93.01	87.637	91.103	89.971	84.203	75.949	87.995	75.185	63.903	94.207	86.815	88.478	79.301	84.41	90.463	90.901	77.895	72.082	92.333	97.23
	94.077	96.727	67.019	78.26	84.009	88.967	73.931	87.854	97.92	97.45	87.433	82.656	87.453	90.728	83.419	94.765	88.672	92.379	81.706	92.752	97.922	90.696	84.722	82.076	90.949	77.54	76.408	92.197	90	93.01	87.637	91.103	89.971	84.203	75.949	87.995	75.185	63.903	94.207	86.815	88.478	79.301	84.41	90.463	90.901	77.895	72.082	92.333	97.23
	94.077	96.727	67.019	78.26	84.009	88.967	73.931	87.854	97.92	97.45	87.433	82.656	87.453	90.728	83.419	94.765	88.672	92.379	81.706	92.752	97.922	90.696	84.722	82.076	90.949	77.54	76.408	92.197	90	93.01	87.637	91.103	89.971	84.203	75.949	87.995	75.185	75.413	94.207	86.815	86.801	79.301	84.41	90.463	76.974	77.895	72.082	92.333	97.23
	94.077	96.727	67.019	78.26	93.551	88.967	73.931	87.854	88.653	97.45	87.433	82.656	87.453	90.728	83.419	94.765	88.672	92.379	81.706	92.597	82.775	90.696	84.722	82.076	90.949	77.54	76.408	92.197	90	93.01	87.637	91.103	89.971	84.203	75.949	96.821	75.185	75.413	94.207	86.815	86.801	79.301	84.41	90.463	76.974	82.573	72.082	92.333	97.23
	94.077	96.727	67.019	78.26	93.551	88.967	73.931	87.854	88.653	97.45	88.8	82.656	87.453	90.728	83.419	94.765	88.672	92.379	81.706	92.597	82.775	90.696	84.722	82.076	90.949	77.54	76.408	92.197	90	93.01	87.637	91.103	89.971	84.203	75.949	96.821	75.185	75.413	94.207	86.815	86.801	79.301	84.41	90.463	94.442	82.573	72.082	92.333	97.23
	94.077	96.727	67.019	78.26	93.551	88.967	73.931	87.854	88.653	97.45	88.8	82.656	85.787	90.728	83.419	94.765	88.672	92.379	81.706	92.597	82.775	90.696	84.722	82.076	90.949	77.54	76.408	92.197	90	93.01	87.637	91.103	89.971	84.203	75.949	96.821	75.185	75.413	94.207	86.815	86.801	79.301	84.41	90.463	88.854	82.573	72.082	92.333	97.23
	94.077	96.727	67.019	94.916	91.684	88.967	73.931	95.516	76.037	97.45	88.8	82.656	85.787	90.728	83.419	94.765	88.672	92.379	81.706	92.597	82.775	90.696	84.722	82.076	90.949	77.54	76.408	92.197	90	93.01	87.637	91.103	89.971	84.203	75.949	96.821	75.185	75.413	94.207	86.815	86.801	79.301	84.41	90.463	88.854	82.573	72.082	92.333	97.23
	94.077	96.727	67.019	94.916	91.684	88.967	73.931	95.516	76.037	97.45	88.8	82.656	85.787	90.728	82.643	92.279	88.672	92.379	81.706	92.597	82.775	90.696	84.722	84.321	90.949	77.54	76.408	92.197	90	93.01	87.637	91.103	89.971	84.203	75.949	78.111	75.185	75.413	94.207	86.815	86.801	79.301	84.41	90.463	88.854	82.573	72.082	92.333	97.23
	94.077	96.727	67.019	94.916	91.684	88.967	73.931	93.552	76.037	97.45	88.8	82.656	85.787	90.728	82.643	92.279	82.225	92.379	81.706	92.597	82.775	90.696	84.722	84.321	90.949	77.54	76.408	92.197	90	93.01	87.637	91.103	89.971	84.203	75.949	78.111	91.16	75.413	94.207	86.815	86.801	79.301	84.41	90.463	88.854	82.573	72.082	92.333	97.23
	94.077	96.727	67.019	94.916	91.684	88.967	73.931	93.552	94.379	97.45	88.8	82.656	85.787	90.728	82.643	92.279	82.225	92.379	81.706	97.604	82.775	90.696	84.722	84.321	90.949	77.54	76.408	92.197	92.52	93.01	87.637	91.103	89.971	84.203	75.949	94.917	91.16	75.413	94.207	86.815	86.801	79.301	84.41	90.463	88.854	82.573	72.082	92.333	97.23
	94.077	96.727	67.019	101.718	91.684	80.548	73.931	93.552	94.379	97.45	88.8	82.656	85.012	90.728	82.643	92.279	82.225	92.379	81.706	97.604	82.775	90.696	84.722	84.321	90.949	77.54	76.408	92.197	92.52	93.01	87.637	91.103	89.971	84.203	75.949	94.917	91.16	75.413	94.207	86.815	85.334	79.301	84.41	90.463	88.854	82.573	72.082	92.333	97.23
	94.077	96.727	67.019	101.718	91.684	80.548	73.931	87.994	94.379	97.45	88.8	82.656	85.012	90.728	82.643	92.279	82.225	92.379	81.706	97.604	82.775	90.696	84.722	84.321	90.949	77.54	76.408	92.197	92.52	93.01	87.637	91.103	89.971	84.203	75.949	94.917	91.16	75.413	94.207	86.815	85.334	86.535	84.41	90.463	88.854	82.573	72.082	92.333	97.23
	94.077	96.727	67.019	101.718	91.684	80.548	73.931	87.994	94.379	97.45	88.8	82.656	85.012	90.728	82.643	92.279	82.225	92.379	81.706	97.604	82.775	90.696	84.722	84.321	90.949	77.54	76.408	92.197	91.401	93.01	87.637	91.103	89.971	84.203	75.949	94.917	91.16	75.413	94.207	86.815	85.334	86.535	84.41	90.463	88.854	82.573	72.082	92.333	97.23
	86.122	96.727	67.019	84.546	92.204	80.878	73.931	76.777	94.379	97.45	88.8	82.656	85.012	90.728	82.643	92.279	82.225	92.379	81.706	97.604	82.775	90.696	74.072	85.134	90.949	77.54	76.408	92.197	91.401	93.01	87.637	91.103	89.971	84.203	75.949	94.917	91.16	75.413	94.207	87.629	85.334	86.535	84.41	90.463	88.854	82.573	75.848	92.333	97.23
	86.122	96.727	67.019	84.546	92.204	80.878	73.931	76.777	94.379	97.45	88.8	82.656	84.817	90.728	82.643	88.296	82.225	92.379	81.706	97.604	82.775	90.696	74.072	85.134	90.949	77.54	76.408	92.197	91.401	93.01	87.637	91.103	89.971	85.892	80.754	94.917	91.16	75.413	94.207	87.629	85.334	86.535	84.41	90.463	88.854	82.573	75.848	92.333	97.23
	86.122	93.805	67.019	84.546	92.204	80.878	73.931	76.777	94.379	97.45	88.8	82.656	84.817	90.728	76.544	88.296	82.225	92.379	81.706	97.604	91.809	90.696	74.072	85.134	90.949	77.54	76.408	92.197	91.401	93.01	87.637	91.103	89.971	85.892	80.754	94.917	91.16	75.413	94.207	87.629	85.334	86.535	84.41	90.463	88.854	82.573	75.848	92.333	97.23
	86.122	93.805	67.019	96.679	92.204	80.878	73.931	87.355	94.379	97.45	88.8	82.656	84.817	90.728	76.544	88.296	82.225	92.379	81.706	89.496	91.809	90.696	74.072	85.134	90.949	77.54	76.408	92.197	91.401	93.01	87.637	87.174	89.971	85.892	80.754	94.917	91.16	75.413	94.207	87.629	88.248	86.535	84.41	90.463	90.872	82.573	75.848	92.333	97.23
	86.122	93.805	67.019	96.679	92.204	80.878	73.931	87.355	94.379	97.45	88.8	82.656	84.817	90.728	76.544	88.296	82.225	92.379	81.706	89.496	91.809	90.696	74.072	85.134	90.949	77.54	76.408	92.197	91.401	93.01	87.637	87.174	89.971	83.029	80.754	94.917	91.16	75.413	94.207	87.629	88.248	86.535	84.41	90.463	90.872	82.573	75.848	92.333	97.23
	86.122	93.805	67.019	96.679	92.204	80.878	73.931	103.187	94.379	97.45	88.8	85.401	84.817	90.728	76.544	88.296	101.088	92.379	81.706	89.496	91.809	90.696	74.072	87.19	90.949	77.54	76.408	92.344	91.401	93.238	87.637	87.174	89.971	83.029	80.754	94.917	91.16	75.413	94.207	87.629	89.619	86.535	84.41	90.463	90.872	82.573	75.848	92.333	97.23
	86.122	93.805	67.019	96.679	92.204	80.878	73.931	103.187	94.379	97.45	88.8	85.401	84.817	90.728	80.661	87.522	101.088	92.379	81.706	89.496	91.809	90.696	78.552	87.19	90.949	77.54	76.408	92.344	91.401	93.238	87.637	87.174	89.971	83.029	80.754	94.917	105.092	75.413	94.207	87.629	89.619	86.535	84.41	90.463	90.908	82.573	75.848	92.333	109.832
	86.122	93.805	67.019	96.679	92.204	80.878	73.931	103.187	94.379	97.45	88.8	88.912	84.817	90.728	80.661	87.522	101.088	92.379	81.706	89.496	91.809	90.696	78.552	87.19	90.949	77.54	76.408	92.344	91.401	93.238	87.637	87.174	89.971	83.029	80.754	94.917	105.092	75.413	94.207	87.629	89.619	86.535	84.41	90.463	90.908	82.573	75.848	92.333	109.832
	86.122	93.805	67.019	96.679	92.204	80.878	73.931	103.187	94.379	97.45	88.8	88.912	84.817	90.728	80.661	87.522	86.852	92.379	81.706	89.496	91.809	90.696	78.552	86.542	90.949	77.54	76.408	92.344	91.401	93.238	87.637	87.174	89.971	89.961	80.754	94.917	105.092	75.413	94.207	87.629	89.619	86.535	84.41	90.463	90.908	82.573	75.848	92.333	109.832
	86.122	93.805	67.019	96.679	92.204	82.944	73.931	103.187	94.379	97.45	88.8	88.912	84.817	90.728	80.661	90.048	86.852	92.379	81.706	89.496	91.809	90.696	84.221	86.542	90.949	77.54	76.408	89.004	90.551	93.238	87.637	87.174	89.971	89.961	80.754	94.917	91.469	75.413	94.207	87.629	89.619	86.535	84.41	90.463	90.908	82.573	75.848	92.333	109.832
	86.122	93.805	67.019	96.679	98.345	82.944	73.931	91.661	94.379	97.45	88.8	88.912	84.817	92.552	80.661	90.048	86.852	92.379	81.706	89.496	91.809	89.21	84.221	86.542	90.949	77.54	76.408	89.004	90.551	93.238	87.637	87.174	89.971	89.961	80.754	94.917	91.469	75.413	94.207	87.629	89.619	86.535	84.41	90.463	90.908	82.573	75.848	92.333	109.832
	86.122	93.805	67.019	96.679	98.345	82.944	73.931	91.661	89.474	97.45	88.8	88.912	84.817	92.552	80.661	90.048	86.852	92.379	81.706	89.496	91.809	97.053	84.221	86.542	90.949	77.54	76.408	89.004	90.551	93.238	87.637	87.174	89.971	83.345	80.754	94.917	91.469	75.413	94.207	87.629	89.619	86.535	84.41	90.463	90.908	82.573	75.848	92.333	109.832
	86.122	93.805	67.019	96.679	98.345	82.944	66.587	99.779	89.474	97.45	88.8	88.912	84.817	92.552	80.661	94.494	86.852	92.379	81.706	89.496	91.809	97.053	84.221	86.542	90.949	77.54	76.408	89.004	90.551	93.238	87.637	87.174	89.971	83.345	80.754	94.917	89.492	75.413	94.207	87.629	89.619	86.535	84.41	90.463	90.908	82.573	75.848	92.333	86.544
	96.03	93.805	67.019	96.679	98.345	82.944	66.587	99.779	89.474	97.45	88.8	88.912	84.817	85.62	80.661	94.494	86.852	92.379	81.706	89.496	91.809	97.053	84.221	86.542	90.949	77.54	76.408	89.004	90.551	93.238	87.637	87.174	89.971	82.591	80.754	94.917	89.492	75.413	94.207	87.629	89.619	86.535	84.41	90.463	90.908	82.573	75.848	92.333	86.544
	96.03	93.805	67.019	96.679	98.345	83.426	66.587	77.668	85.793	97.45	88.8	88.912	84.817	85.62	80.661	94.494	86.852	92.083	81.706	89.496	91.809	97.053	84.221	86.542	90.949	77.54	76.408	89.004	90.551	93.238	87.637	87.174	89.971	82.591	80.754	94.917	89.492	75.413	94.207	87.629	89.619	86.535	84.41	90.463	90.908	88.662	75.848	92.333	99.33
	96.03	93.805	67.019	96.679	92.109	83.426	66.587	77.668	85.793	97.45	88.8	88.912	84.817	85.62	80.661	90.633	86.852	92.083	81.706	89.496	91.809	97.053	84.221	86.542	90.949	77.54	76.408	89.004	90.551	93.238	87.637	87.174	89.971	77.273	80.754	85.414	89.492	75.413	94.207	87.629	89.619	86.535	84.41	90.463	90.908	88.662	75.848	92.333	99.33
	96.03	98.732	67.019	96.679	92.109	83.426	79.528	77.668	85.793	97.45	88.8	88.912	84.817	91.113	80.661	90.633	86.852	117.448	81.706	84.573	91.809	97.053	84.221	86.542	90.949	77.54	76.408	89.004	90.551	93.238	87.637	87.174	89.971	77.273	80.754	85.414	89.492	75.413	94.207	87.629	89.619	86.535	84.41	90.463	90.908	77.645	75.848	92.333	99.33
	96.03	98.732	67.019	96.679	85.201	83.426	79.528	77.668	85.793	97.45	88.8	88.912	84.817	91.113	80.661	90.633	86.852	117.448	81.706	84.573	91.809	91.985	84.221	86.542	90.949	77.54	76.408	89.004	88.974	93.238	87.637	87.174	89.971	77.273	80.754	85.414	89.492	75.413	94.207	87.629	89.619	86.535	84.41	90.463	86.701	77.645	75.848	92.333	99.33
	96.03	98.732	67.019	96.679	85.201	83.426	79.528	77.668	85.793	97.45	88.8	88.912	84.817	91.113	80.661	90.633	86.852	95.857	81.706	84.573	91.809	91.985	84.221	86.542	90.949	77.54	76.408	89.004	88.974	93.238	87.637	87.174	89.971	77.273	80.754	85.414	89.492	75.413	94.207	87.629	89.619	86.535	84.41	90.463	86.701	77.645	75.848	92.333	99.33
	96.03	98.732	67.019	96.679	85.201	83.426	88.643	84.752	85.793	97.45	88.8	88.912	84.817	91.113	80.661	90.633	86.852	95.857	81.706	84.573	91.809	91.985	84.221	86.542	90.949	77.54	76.408	89.004	88.974	93.238	87.637	87.174	89.971	77.273	80.754	85.414	89.492	75.413	94.207	87.629	89.619	86.535	84.41	90.463	86.701	77.645	75.848	92.333	99.33
	96.03	98.732	67.019	96.679	85.201	83.426	88.643	84.752	85.793	97.45	88.8	88.912	76.23	91.113	80.661	90.633	86.852	95.857	81.706	84.573	91.809	91.985	84.221	86.542	90.949	77.54	76.408	89.004	88.974	93.238	87.637	87.174	89.971	77.273	80.754	85.414	89.492	75.413	94.207	87.629	89.619	86.535	84.41	90.463	86.701	77.645	75.848	92.333	83.84
	96.03	98.732	71.631	96.679	85.201	83.62	86.868	84.752	85.793	97.45	88.8	88.912	76.23	91.113	80.661	80.496	86.852	95.857	81.706	84.573	91.809	91.985	84.221	86.542	90.949	77.54	76.408	89.004	88.974	93.238	87.637	87.174	89.971	85.004	80.754	85.414	89.492	75.413	94.207	87.629	89.619	86.535	75.752	90.463	86.701	77.645	75.848	92.333	83.84
	96.03	94.457	71.631	96.679	85.201	83.62	86.868	84.752	85.793	97.45	88.8	88.912	76.23	91.113	80.661	80.496	86.852	95.857	81.706	84.573	91.809	91.985	84.221	86.542	90.949	77.54	76.408	89.004	88.974	93.238	87.637	87.174	89.971	85.004	80.754	85.414	89.492	75.413	94.207	87.629	89.619	86.535	75.752	90.463	86.701	77.645	75.848	92.333	83.84
	93.597	94.457	71.631	96.679	85.201	83.62	86.868	84.752	85.793	97.45	88.8	88.912	76.23	91.113	80.661	80.496	86.852	95.857	81.706	93.296	91.809	91.985	84.221	86.542	90.949	77.54	76.408	89.004	88.974	93.238	87.637	87.174	89.971	85.004	80.754	85.414	89.492	75.413	94.207	87.629	89.619	86.535	75.752	90.463	86.701	77.645	75.848	92.333	90.8
	93.597	94.457	70.703	96.679	88.769	83.62	86.868	84.752	85.793	97.45	88.8	88.912	76.23	91.113	80.661	88.463	86.852	95.857	81.706	93.296	91.809	90.791	84.221	86.542	90.949	77.54	69.902	89.004	88.974	93.238	87.637	87.174	89.971	85.004	75.623	85.414	89.492	75.413	94.207	87.629	89.619	86.535	75.752	90.463	100.253	77.645	75.848	92.333	90.8
	93.597	94.457	70.703	96.679	88.769	83.62	86.868	84.752	85.793	97.45	88.8	88.912	76.23	91.113	80.661	88.463	86.852	95.857	81.706	93.296	91.809	90.791	84.221	86.542	90.949	77.54	69.902	89.004	88.974	90.612	87.637	87.174	89.971	85.706	75.623	85.414	89.492	75.413	94.207	87.629	89.619	86.535	75.752	90.463	100.253	77.645	75.848	92.333	90.8
	93.597	94.457	70.703	96.679	88.769	83.62	86.868	102.322	85.793	97.45	88.8	88.912	76.23	91.113	80.661	88.463	86.852	95.857	81.706	93.296	91.809	90.791	84.221	86.542	90.949	77.54	69.902	89.004	87.606	90.612	87.637	87.174	89.971	85.706	75.623	85.414	89.492	75.413	94.207	87.629	89.619	86.535	75.752	90.463	100.253	77.645	75.848	92.333	90.8
	93.597	94.457	70.703	96.679	88.769	83.62	86.868	102.322	85.793	97.45	88.8	88.912	76.23	91.113	80.661	88.463	86.852	95.857	81.706	93.296	91.809	90.791	84.221	86.542	90.949	77.54	69.902	89.004	87.606	90.612	87.637	87.174	89.971	85.706	75.623	85.414	89.492	75.413	94.207	87.629	89.619	86.535	82.565	90.463	100.253	77.645	75.848	92.333	90.8
	93.597	94.457	59.504	96.679	88.769	83.62	86.868	102.322	85.793	97.45	88.8	88.912	95.438	91.113	80.661	88.463	86.852	95.857	81.706	93.296	91.809	90.791	84.221	86.542	90.949	77.54	58.415	89.004	87.606	93.588	87.637	87.174	89.971	85.706	75.623	85.414	89.492	75.413	94.207	87.629	89.619	86.535	82.565	90.463	77.077	77.645	75.848	92.333	90.8
	93.597	94.457	59.504	96.679	88.769	67.007	86.868	90.121	85.793	97.45	88.8	88.912	95.438	91.113	80.661	88.463	86.852	95.857	81.706	87.164	91.809	90.791	84.221	86.542	90.949	77.54	58.415	89.004	87.606	93.588	87.637	87.174	89.971	85.706	75.623	85.414	89.492	75.413	94.207	87.629	89.619	86.535	82.565	90.463	77.077	77.645	75.848	92.333	90.8
	108.973	94.457	59.504	96.679	88.769	67.007	86.868	90.121	85.793	97.45	88.8	88.912	95.438	88.636	80.661	88.463	86.852	95.857	81.706	87.164	91.809	90.791	84.221	86.542	90.949	77.54	58.415	89.004	87.606	93.588	87.637	87.174	89.971	85.706	75.623	85.414	89.492	75.413	94.207	87.629	89.619	86.535	82.565	90.463	95.162	77.645	75.848	92.333	90.8
	108.973	94.457	59.504	96.679	88.769	67.007	86.868	88.215	85.793	97.45	88.8	88.912	94.568	88.636	76.87	88.463	86.852	95.857	81.706	87.164	91.809	90.791	84.221	86.542	90.949	77.54	58.415	89.004	87.606	93.588	87.637	87.174	89.971	85.706	75.623	96.263	89.492	75.413	94.207	87.629	89.619	86.535	82.565	90.463	95.162	77.645	75.848	92.333	90.8
	108.973	94.457	59.504	96.679	88.769	67.007	86.868	88.215	85.793	97.45	88.8	88.912	94.568	88.636	76.87	88.463	86.852	95.857	81.706	87.164	91.809	90.791	84.221	86.542	90.949	77.54	58.415	89.004	87.606	93.588	87.637	87.174	89.971	85.706	75.623	91.755	89.492	75.413	94.207	87.629	89.619	86.535	82.565	90.463	95.162	77.645	75.848	90.18	90.8
	101.307	94.457	59.504	96.679	88.769	67.007	86.868	88.215	85.793	97.45	88.8	88.912	88.129	88.636	76.87	88.463	86.852	95.857	81.706	87.164	91.809	90.791	84.221	86.542	90.949	77.54	58.415	89.004	89.662	93.588	87.637	87.174	89.971	85.706	75.623	91.755	89.492	75.413	94.207	87.629	89.619	86.535	82.565	90.463	95.162	77.645	75.848	90.18	90.8
	101.307	94.457	59.504	85.541	88.769	67.007	86.868	90.639	85.793	97.45	88.8	88.912	88.129	88.636	76.87	88.463	86.852	95.857	81.706	87.164	91.809	90.791	84.221	86.542	90.949	77.54	58.415	89.004	89.662	93.588	87.637	87.174	89.971	84.731	75.623	91.755	89.492	75.413	94.207	87.629	89.619	86.535	82.565	90.463	95.162	77.645	75.848	90.18	90.8
	101.307	88.464	59.504	88.272	88.769	67.007	86.868	90.639	85.793	97.45	88.8	88.912	88.129	88.636	76.87	88.463	86.852	95.857	81.706	87.164	91.809	90.791	84.221	86.542	90.949	77.54	67.643	89.004	89.662	93.588	87.637	87.174	89.971	84.731	66.808	91.755	89.492	75.413	94.207	87.629	89.619	86.535	82.565	90.463	95.162	89.583	75.848	90.18	90.8
	101.307	88.464	59.504	88.272	88.769	67.007	86.868	90.639	85.793	97.45	88.8	88.912	88.129	89.696	71.234	88.463	86.852	95.857	81.706	87.164	91.809	90.791	84.221	86.542	90.949	77.54	67.643	89.004	89.662	97.153	87.637	87.174	89.971	84.731	66.808	91.755	89.492	75.413	94.207	87.629	89.619	86.535	82.565	90.463	95.162	89.583	75.848	90.18	90.8
	97.867	88.464	59.504	88.272	88.769	67.007	86.868	90.639	85.793	97.45	88.8	88.912	88.129	89.696	71.234	88.463	86.852	95.857	81.706	87.164	91.809	90.791	84.221	83.154	90.949	77.54	67.643	89.004	89.662	97.153	87.637	87.174	89.971	84.731	66.808	82.677	89.492	82.315	94.207	88.075	89.619	86.535	82.565	90.463	80.569	89.583	75.848	90.18	90.8
	97.867	88.464	59.504	88.272	88.769	67.007	86.868	90.639	85.793	97.45	88.8	88.912	88.129	89.696	71.234	88.463	86.852	95.857	71.781	87.164	91.809	90.791	84.221	83.154	90.949	77.54	67.643	89.004	89.662	97.153	87.637	87.174	89.971	84.731	66.808	82.677	89.492	82.315	94.207	88.075	89.619	86.535	82.565	90.463	80.569	89.583	75.848	90.18	90.8
	97.867	88.464	59.504	88.272	88.769	67.007	86.868	90.639	85.793	97.45	88.8	88.912	88.129	89.696	85.555	91.754	86.852	95.857	71.781	93.694	91.809	90.791	84.221	83.154	90.949	77.54	64.57	89.004	89.662	97.153	87.637	87.174	89.971	84.731	66.808	82.677	89.492	82.315	94.207	88.075	89.619	86.535	82.565	90.463	80.569	89.583	75.848	90.18	90.8
	97.867	88.464	59.504	88.272	88.769	67.007	86.868	90.639	87.221	97.45	88.8	88.912	100.6	89.696	85.555	91.754	86.852	95.857	71.781	93.694	91.809	90.791	84.221	83.154	90.949	77.54	64.57	89.004	89.662	97.153	87.637	87.174	89.971	84.731	66.808	88.092	89.492	82.315	94.207	88.075	89.619	86.535	82.565	90.463	92.289	89.583	75.848	90.18	90.8
	97.867	88.464	59.504	103.77	88.769	67.007	86.868	90.639	87.221	97.45	88.8	88.912	100.6	89.696	85.555	91.754	86.852	95.857	71.781	93.694	91.809	90.791	84.221	83.154	90.949	77.54	64.57	89.004	89.662	97.153	87.637	87.174	89.971	84.731	77.109	88.092	89.492	82.315	94.207	88.075	89.619	86.535	82.565	90.463	92.289	89.583	75.848	90.18	90.8
	97.867	88.464	59.504	96.826	88.769	67.007	86.868	91.927	87.221	97.45	88.8	88.912	100.6	89.696	85.555	91.754	86.852	95.857	71.781	92.724	91.809	90.791	84.221	83.154	90.949	77.54	61.708	89.004	89.662	97.153	87.637	87.174	89.971	84.731	77.109	88.092	89.492	82.315	100.575	88.075	96.504	86.535	82.565	90.463	92.289	89.583	75.848	90.18	103.167
	97.867	88.464	59.504	96.826	88.769	67.007	77.32	91.927	87.221	97.45	88.8	88.912	100.6	89.696	85.555	91.754	86.852	95.857	71.781	92.724	91.809	90.791	84.221	83.154	90.949	77.54	61.708	88.668	89.662	97.153	87.637	87.174	89.971	84.731	77.109	88.092	89.492	82.315	100.575	88.075	96.504	86.535	82.565	90.463	92.289	89.583	75.848	90.18	103.167
	97.867	88.464	59.504	96.826	88.769	67.007	77.32	91.927	87.221	97.45	88.8	88.912	100.6	89.696	85.555	91.754	86.852	95.857	66.404	92.724	91.809	90.791	84.221	83.154	90.949	77.54	61.708	88.668	89.662	97.153	87.637	87.174	89.971	84.731	77.109	88.092	89.492	82.315	100.575	88.075	96.504	86.535	82.565	90.463	92.289	89.583	75.848	90.18	103.167
	97.867	88.464	59.504	96.826	88.769	67.007	86.519	91.927	87.221	97.45	88.8	88.912	94.565	89.696	85.555	91.754	86.852	95.857	66.404	92.724	91.809	90.791	84.221	83.154	90.949	77.54	61.708	88.668	89.662	97.153	87.637	87.174	89.971	84.731	77.109	88.092	89.492	82.315	100.575	88.075	96.504	86.535	82.565	90.463	92.289	89.583	75.848	90.18	103.167
	83.515	88.464	59.504	80.065	88.769	67.007	86.519	91.927	87.221	97.45	88.8	88.912	94.565	89.696	85.555	91.754	86.852	95.857	66.404	92.724	91.809	90.791	84.221	83.154	90.949	77.54	61.708	88.668	89.662	97.153	87.637	87.174	89.971	84.731	77.109	88.092	89.492	82.315	100.575	88.075	96.504	86.535	82.565	90.463	92.289	89.583	75.848	90.18	87.127
	83.515	88.464	59.504	80.065	88.769	67.007	86.519	91.927	84.033	97.45	88.8	88.912	94.565	89.696	85.555	91.754	86.852	95.857	66.404	92.724	91.809	90.791	84.221	83.154	90.949	77.54	61.708	88.668	89.662	97.153	87.637	87.174	89.971	84.731	77.109	88.092	89.492	82.315	100.575	88.075	96.504	86.535	82.565	90.463	92.289	89.583	75.848	90.18	87.127
	83.515	88.464	59.504	87.906	88.769	67.007	86.519	91.927	84.033	97.45	88.8	88.912	94.565	89.696	85.555	95.059	86.852	95.857	66.404	92.724	91.809	90.791	84.221	83.154	90.949	77.54	61.708	88.668	89.662	97.153	87.637	87.174	89.971	92.453	77.109	88.092	89.492	82.315	100.575	88.075	96.504	86.535	82.565	90.463	92.289	89.583	75.848	90.18	87.127
	83.515	88.464	59.504	87.906	88.769	67.007	86.519	91.927	84.033	97.45	88.8	88.912	94.565	89.696	85.555	95.059	86.852	95.857	66.404	92.724	91.809	90.791	84.221	83.154	90.949	77.54	61.708	88.668	89.662	97.153	87.637	87.174	89.971	92.453	77.109	88.092	89.492	82.315	100.575	88.075	96.504	86.535	82.565	90.463	92.289	89.583	75.848	90.18	87.127
	97.844	88.464	51.639	87.906	88.769	67.007	86.519	97.316	84.033	97.45	88.8	88.912	94.565	89.696	85.555	95.059	86.852	95.857	66.404	92.724	91.809	90.791	84.221	95.379	90.949	77.54	61.708	86.981	89.662	97.153	87.637	87.174	89.971	92.453	77.109	88.092	89.492	82.315	100.575	90.425	96.504	86.535	82.565	90.463	92.289	76.417	75.848	90.18	87.127
	97.844	88.464	51.639	87.906	88.769	67.007	86.519	97.316	84.033	97.45	88.8	88.912	94.565	89.696	85.555	95.059	86.852	95.857	66.404	92.724	91.809	90.791	84.221	95.379	90.949	77.54	61.708	86.981	89.662	97.153	87.637	87.174	89.971	92.453	77.109	88.092	89.492	82.315	100.575	90.425	96.504	86.535	82.565	90.463	92.289	76.417	75.082	90.18	87.127
	97.844	88.464	51.639	87.906	88.769	67.007	86.519	97.316	84.033	97.45	88.8	88.912	94.565	89.696	85.555	86.259	86.852	95.857	66.404	92.724	91.809	90.791	84.221	95.379	90.949	77.54	61.708	86.981	89.662	97.153	87.637	87.174	89.971	92.453	77.109	88.092	89.492	82.315	100.575	90.425	96.504	86.535	82.194	90.463	92.289	76.417	75.082	90.18	87.127
	83.922	88.464	51.639	87.906	88.769	67.007	86.519	85.776	84.033	97.45	88.8	88.912	94.565	89.696	83.574	86.259	86.852	95.857	81.601	76.191	84.897	90.791	84.221	95.379	90.949	77.54	61.708	86.981	89.662	97.153	87.637	87.174	89.971	91.857	77.109	88.092	89.492	82.315	88.497	90.425	96.504	86.535	82.194	90.463	92.289	76.417	75.082	90.18	87.127
	83.922	88.464	51.639	87.906	88.769	67.007	86.519	85.776	84.033	97.45	88.8	88.912	94.565	89.696	83.574	86.259	86.852	95.857	81.601	76.191	84.897	90.791	84.221	95.379	90.949	77.54	61.708	86.981	89.662	97.153	87.637	87.174	89.971	91.857	77.109	88.092	89.492	82.315	88.497	90.425	96.504	86.535	82.194	90.463	92.289	95.067	75.082	90.18	87.127
	83.922	88.464	51.639	87.906	88.769	67.007	86.519	85.776	84.033	97.45	88.8	88.912	94.565	89.696	83.574	83.838	86.852	95.857	81.601	76.191	84.897	90.791	84.221	95.379	90.949	77.54	61.708	86.981	93.45	97.153	87.637	87.174	89.971	91.857	77.109	88.092	89.492	82.315	88.497	90.425	96.504	86.535	82.194	90.463	92.289	95.067	75.082	90.18	87.127
	83.922	88.464	51.639	87.906	88.769	67.007	86.519	85.065	84.033	97.45	88.8	88.912	94.565	94.717	83.574	83.838	86.852	95.857	81.601	91.265	84.897	90.791	84.221	95.379	90.949	77.54	61.708	86.981	93.45	97.153	87.637	87.174	89.971	91.857	77.109	92.924	89.492	81.793	88.497	90.425	96.504	86.535	82.194	90.463	92.289	95.067	79.314	90.18	87.127
	83.922	88.464	51.639	87.906	92.836	67.007	86.519	85.065	108.526	97.45	88.8	88.912	94.565	94.717	83.574	83.838	86.852	95.857	81.601	91.265	84.897	90.791	84.221	95.379	90.949	77.54	61.708	86.981	93.45	97.153	87.637	87.174	89.971	91.857	77.109	92.924	89.492	81.793	88.497	90.425	96.504	86.535	82.194	90.463	92.289	95.067	79.314	90.18	87.127
	83.922	88.464	51.639	87.906	92.836	67.007	86.519	85.065	108.526	97.45	88.8	88.912	94.565	90.134	83.574	83.838	86.852	95.857	81.601	91.265	84.897	90.791	84.221	95.379	90.949	77.54	61.708	89.513	93.45	97.153	87.637	87.174	89.971	91.857	74.081	92.924	89.492	81.793	88.497	90.425	96.504	86.535	82.194	90.463	92.289	95.067	79.314	90.18	87.127
	83.922	88.464	51.639	87.906	92.836	67.007	86.519	85.065	90.113	97.45	88.8	88.912	94.565	90.134	83.574	83.838	86.852	95.857	81.601	86.107	106.079	90.791	84.221	95.379	90.949	77.54	61.708	89.513	93.45	97.153	87.637	87.174	89.971	85.796	74.081	92.924	89.492	81.793	88.497	90.425	96.504	86.535	82.194	90.463	92.289	99.807	79.314	90.18	87.127
	83.922	88.464	51.639	87.906	92.836	67.007	86.519	85.065	90.113	97.45	88.8	88.912	94.565	90.134	83.574	83.838	86.852	89.659	79.907	86.107	106.079	90.791	84.221	95.379	90.949	77.54	61.708	89.513	93.45	97.153	87.637	87.174	89.971	85.796	74.081	92.924	89.492	81.793	88.497	90.425	96.504	86.535	82.194	90.463	92.289	99.807	79.314	90.18	87.127
	83.922	88.464	51.639	87.906	92.836	67.007	86.519	90.96	90.113	97.45	88.8	88.912	94.565	90.134	77.774	83.838	86.852	89.659	79.907	86.107	106.079	90.791	84.221	95.379	90.949	77.54	61.708	89.513	93.45	97.153	87.637	87.174	89.971	85.796	74.081	92.924	89.492	81.793	88.497	90.425	96.504	86.535	82.194	90.463	92.289	99.807	79.314	90.18	87.127
	83.922	88.464	52.861	86.892	92.836	67.007	80.31	90.96	90.113	97.45	88.8	88.912	94.565	90.134	77.774	83.838	86.457	89.659	79.907	86.107	86.042	90.791	84.221	95.379	90.949	77.54	61.708	89.513	93.45	97.153	87.637	87.174	89.971	85.796	74.081	92.924	89.492	81.793	88.497	90.425	96.504	86.535	82.194	90.463	92.289	99.807	79.314	90.18	87.127
	83.922	88.464	52.861	86.892	92.836	67.007	80.31	90.96	90.113	97.45	88.8	88.912	94.565	90.134	77.774	88.917	86.457	89.659	79.907	86.107	86.042	90.791	84.221	95.379	90.949	77.54	61.708	89.513	93.45	97.153	87.637	87.174	89.971	85.796	74.081	92.924	89.492	81.793	88.497	90.425	96.504	86.535	82.194	90.463	92.289	99.807	79.314	90.18	87.127
	83.922	88.464	52.861	86.892	92.836	67.007	80.31	90.96	90.113	97.45	88.8	88.912	94.565	90.134	77.774	88.917	86.457	89.659	79.907	86.107	86.042	90.791	84.221	86.091	90.949	77.54	61.708	89.513	93.45	97.153	87.637	87.174	89.971	86.355	57.334	92.924	89.492	75.507	88.497	90.425	96.504	86.535	82.194	90.463	92.289	99.807	79.314	90.18	87.127
	85.911	88.464	52.861	86.892	92.836	67.007	83.892	90.96	90.113	97.45	88.8	88.912	94.565	90.134	77.774	88.917	86.457	89.659	79.907	86.107	86.042	90.791	84.221	86.091	90.949	77.54	63.879	89.513	93.45	97.153	86.647	87.174	89.971	86.355	57.334	92.924	89.492	75.507	88.497	90.425	96.504	86.535	82.194	90.463	92.289	99.807	79.314	90.18	87.127
	85.911	88.464	52.861	86.892	92.836	67.007	83.892	88.8	90.113	97.45	88.8	88.912	94.565	90.134	77.774	88.917	86.457	89.659	76.887	86.107	86.042	90.791	84.221	86.091	90.949	77.54	63.879	89.513	93.45	93.789	86.647	87.174	89.971	86.355	76.418	92.924	88.622	75.507	88.497	90.425	96.504	86.535	82.194	90.463	92.289	99.807	79.314	90.18	87.127
	85.911	88.464	52.861	86.892	92.836	67.007	83.892	88.8	90.113	97.45	88.8	88.912	94.565	90.134	77.774	88.917	86.457	89.659	76.887	86.107	86.042	90.791	84.221	86.091	80.87	77.54	63.879	86.913	93.45	93.789	86.647	93.213	89.971	86.355	76.418	92.924	88.622	75.507	88.497	90.425	96.504	86.535	82.194	90.463	92.289	99.807	81.243	90.18	87.127
	85.911	88.464	52.861	86.892	92.836	67.007	83.892	88.8	90.113	97.45	88.8	88.912	94.565	90.134	77.774	88.917	86.457	89.659	76.887	86.107	88.374	90.791	84.221	109.54	80.87	77.54	63.879	86.913	93.45	93.789	86.647	93.213	89.971	86.355	76.418	92.924	88.622	75.507	88.497	90.425	96.504	86.535	82.194	90.463	92.289	99.807	81.243	90.18	87.127
	85.911	88.464	52.861	86.892	92.836	67.007	83.892	88.8	90.113	97.45	88.8	88.912	94.565	90.134	83.966	88.917	86.457	89.659	76.887	86.107	88.374	90.791	84.221	109.54	80.87	77.54	63.879	86.913	91.041	93.789	86.647	93.213	89.971	86.355	76.418	92.924	88.622	75.507	88.497	90.425	96.504	86.535	82.194	90.463	92.289	86.916	81.243	90.18	87.127
	85.911	88.464	52.861	92.103	92.836	67.007	83.892	102.548	90.113	97.45	88.8	88.912	94.565	90.134	83.966	88.917	86.457	89.659	76.887	86.107	88.374	90.791	84.221	109.54	80.87	77.54	68.645	86.913	91.041	93.789	86.647	93.213	89.971	86.355	76.418	92.924	88.622	75.507	88.497	90.425	96.504	86.535	82.194	90.463	87.585	86.916	69.267	90.18	87.127
	85.911	90.235	52.861	92.103	92.836	67.007	83.892	102.548	90.113	97.45	88.8	88.912	87.509	90.134	83.966	88.917	86.457	89.659	76.887	86.107	88.374	90.791	84.221	109.54	80.87	77.54	68.645	86.913	91.041	93.789	86.647	93.213	89.971	86.355	76.418	92.924	88.622	75.507	88.497	90.425	96.504	86.535	82.194	90.463	87.585	86.916	69.267	82.51	87.127
	85.911	90.235	52.861	91.789	92.836	67.007	83.892	102.548	72.004	97.45	88.8	88.912	87.509	90.134	83.966	88.917	86.457	89.659	76.887	86.107	88.374	90.791	84.221	109.54	80.87	77.54	68.645	86.913	91.041	93.789	86.647	93.213	89.971	86.355	76.418	92.924	88.622	75.507	88.497	90.425	96.504	86.535	82.194	90.463	87.585	86.916	69.267	82.51	87.127
	85.911	88.915	52.861	91.789	92.836	67.007	83.892	102.548	72.004	97.45	88.8	88.912	87.509	90.134	83.966	91.279	86.457	89.659	76.887	86.107	88.374	90.791	84.221	109.54	80.87	77.54	68.645	86.913	91.041	93.789	86.647	93.213	89.971	88.199	76.418	92.924	88.622	75.507	88.497	90.425	96.504	86.535	82.194	90.463	87.585	86.916	69.267	82.51	87.127
	85.911	88.915	52.861	88.623	92.836	67.007	83.892	102.548	95.782	97.45	88.8	88.912	87.509	90.134	83.966	91.279	86.457	89.659	77.655	86.107	88.374	90.791	84.221	109.54	80.87	77.54	68.645	86.913	91.041	93.789	86.647	93.213	89.971	88.199	76.418	92.924	88.622	75.507	88.497	90.425	96.504	86.535	82.194	90.463	87.585	86.916	69.267	82.51	87.127
	85.911	88.915	52.861	88.623	92.836	67.007	83.892	102.548	95.782	97.45	88.8	88.912	87.509	90.134	83.966	91.279	86.457	89.659	77.655	88.823	88.374	90.791	84.221	109.54	80.87	77.54	68.645	86.913	78.277	93.789	86.647	93.213	89.971	88.199	76.418	92.924	88.622	75.507	88.497	90.425	96.504	86.535	82.194	90.463	87.585	86.916	80.669	82.51	87.127
	85.911	88.915	52.861	88.623	92.836	67.007	83.892	75.129	95.782	107.905	88.8	88.912	87.509	90.134	83.966	91.279	86.457	89.659	77.655	88.823	88.374	90.791	84.221	109.54	80.87	77.54	68.645	86.913	78.277	93.789	86.647	93.213	89.971	88.199	69.434	92.924	88.622	75.507	88.497	90.425	96.504	86.535	82.194	90.463	87.585	86.916	80.669	82.51	87.127
	85.911	88.915	52.861	88.623	92.836	67.007	83.892	75.129	95.782	107.905	88.8	88.912	87.509	90.134	83.966	91.279	86.457	89.659	77.655	88.823	83.701	81.812	84.221	109.54	80.87	77.54	50.116	83.49	82.044	92.016	86.647	93.213	89.971	88.199	74.308	92.924	88.622	77.021	88.497	90.425	96.504	86.535	82.194	90.463	87.585	86.916	80.669	82.51	87.127
	85.911	88.915	52.861	88.623	92.836	67.007	83.892	75.129	95.782	107.905	88.8	88.912	87.509	90.134	83.966	91.279	86.457	89.659	72.662	88.823	83.701	81.812	84.221	109.54	80.87	77.54	50.116	83.49	82.044	92.016	86.647	93.213	89.971	88.199	74.308	92.924	88.622	91.595	88.497	90.425	96.504	86.535	82.194	90.463	87.585	95.865	80.669	82.51	87.127
	102.122	88.915	52.861	88.623	92.836	67.007	83.892	75.129	95.782	107.905	88.8	88.912	87.509	90.134	83.966	91.279	86.457	89.659	72.662	88.823	91.864	81.812	84.221	109.54	80.87	77.54	66.023	83.49	82.044	92.016	86.647	93.213	89.971	88.199	74.308	92.924	88.622	91.595	88.497	90.425	96.504	86.535	82.194	90.463	87.585	95.865	80.669	82.51	87.127
	102.122	88.915	52.861	88.623	92.836	67.007	83.892	75.129	95.782	107.905	88.8	88.912	87.509	90.134	83.966	91.279	86.457	89.659	72.662	88.823	91.864	81.812	84.221	109.54	80.87	77.54	66.023	83.49	97.884	95.243	86.647	93.213	89.971	85.771	74.308	92.924	88.622	91.595	88.497	90.425	96.504	86.535	82.194	90.463	87.585	95.865	80.669	82.51	87.127
	102.122	88.915	52.861	88.623	92.836	67.007	83.892	92.39	95.782	107.905	88.8	88.912	87.509	90.134	83.966	91.279	82.87	89.659	69.015	88.823	91.864	81.906	84.221	109.54	80.87	77.54	66.023	91.628	97.884	95.243	86.647	93.213	89.971	85.771	74.308	89.285	88.622	91.595	88.497	90.425	96.504	86.535	82.194	90.463	87.585	95.865	80.669	82.596	87.127
	94.638	88.915	67.394	88.623	92.836	67.007	83.892	92.39	95.782	107.905	88.8	88.912	87.509	90.134	83.966	91.279	82.87	89.659	69.015	88.823	91.864	81.906	84.221	109.54	80.87	77.54	66.023	91.628	97.884	95.243	86.647	89.554	89.971	85.771	74.308	89.285	88.622	91.595	88.497	90.425	96.504	86.535	82.194	90.463	87.585	95.865	80.669	82.596	87.127
	94.638	88.915	43.797	88.623	92.836	67.007	83.892	92.39	95.782	107.905	88.8	88.912	87.509	90.134	83.966	91.279	82.87	89.659	69.015	88.823	91.864	81.906	84.221	109.54	80.87	77.54	66.023	91.628	97.884	95.243	86.647	89.554	89.971	85.771	74.308	89.285	88.622	91.595	88.497	90.425	96.504	86.535	82.194	90.463	87.585	95.865	80.669	82.596	87.127
	94.638	88.915	43.797	88.623	92.836	67.007	83.892	92.39	95.782	107.905	88.8	88.912	87.509	90.134	88.585	91.279	82.87	89.659	63.895	89.925	91.864	93.079	84.221	109.54	80.87	77.54	66.023	91.628	86.304	95.243	86.647	89.554	89.971	85.771	74.308	89.285	88.622	91.595	88.497	90.425	96.504	86.535	82.194	90.463	87.585	95.865	80.669	82.596	87.127
	94.638	88.915	43.797	88.623	92.836	67.007	83.892	92.39	98.748	107.905	88.8	88.912	87.509	90.134	88.585	100.045	82.87	89.659	63.895	89.925	91.864	93.079	84.221	109.54	80.87	77.54	66.309	91.628	86.304	95.243	86.647	89.554	89.971	85.771	74.308	89.285	88.622	91.595	88.497	90.425	96.504	86.535	82.194	90.463	87.585	95.865	80.669	82.596	87.127
	94.638	88.915	43.797	88.623	90.323	67.007	83.892	92.39	98.748	107.905	88.8	88.912	87.509	90.134	61.538	100.045	98.331	89.659	63.895	89.925	91.864	93.079	84.221	109.54	86.457	77.54	66.309	91.628	86.304	95.243	86.647	89.554	89.971	85.771	74.308	89.285	88.622	91.595	88.497	90.425	96.504	86.535	82.194	90.463	87.585	95.865	77.552	91.205	87.127
	94.638	88.915	43.797	88.623	90.323	67.007	83.892	92.39	98.748	107.905	88.8	88.912	87.509	90.134	61.538	100.045	98.331	89.659	68.421	89.925	91.864	93.079	84.221	109.54	86.457	77.54	66.309	91.628	86.304	95.243	86.647	89.554	89.971	85.771	74.308	89.285	88.622	91.595	88.497	90.425	96.504	86.535	82.194	90.463	87.585	95.865	77.552	91.205	87.127
	94.638	88.915	43.797	88.623	90.323	67.007	83.892	84.025	98.748	107.905	88.8	88.912	87.509	90.134	61.538	100.045	98.331	89.659	68.421	89.925	91.864	93.079	84.221	109.54	86.457	77.54	66.309	91.628	92.655	95.243	86.647	89.554	89.971	85.771	74.308	89.285	88.622	91.595	88.497	90.425	96.504	86.535	82.194	90.463	87.585	95.865	77.552	91.205	87.127
	94.638	88.915	43.797	88.623	90.323	67.007	83.892	84.025	98.748	107.905	88.8	88.912	87.509	90.134	71.776	100.045	85.579	89.659	68.421	89.925	91.864	93.079	84.221	109.54	93.451	77.54	66.309	91.628	92.655	95.243	86.647	89.554	89.971	85.771	74.308	89.285	88.622	91.595	88.497	90.425	96.504	86.535	82.194	90.463	87.585	95.865	70.043	91.205	87.127
	94.638	88.915	43.797	88.623	90.323	67.007	83.892	84.025	98.748	107.905	88.8	88.912	87.509	90.134	71.776	100.045	85.579	89.659	68.421	89.925	91.864	93.079	84.221	109.54	93.451	77.54	66.309	91.628	92.655	95.243	86.647	89.554	89.971	85.771	74.308	89.285	88.622	91.595	88.497	90.425	96.504	86.535	82.194	90.463	87.585	95.865	70.043	89.799	87.127
	94.638	88.915	58.699	88.623	90.323	67.007	83.892	88.363	98.748	107.905	88.8	88.912	87.509	90.134	71.776	88.791	85.579	89.659	68.421	89.925	91.864	93.079	84.221	109.54	93.451	77.54	66.309	91.628	92.655	95.243	89.962	89.554	89.971	85.771	74.308	89.285	89.52	91.595	88.497	90.425	96.504	86.535	82.194	90.463	87.585	95.865	70.043	89.799	87.127
	94.638	88.915	58.699	88.623	90.323	67.007	83.892	88.363	98.748	107.905	88.8	88.912	87.509	90.134	71.776	88.791	101.12	89.659	68.421	89.925	99.723	93.079	84.221	109.54	93.451	77.54	66.309	91.628	92.655	95.243	89.962	89.554	89.971	85.771	74.308	89.285	89.52	91.595	88.497	90.425	96.504	86.535	82.194	90.463	87.585	90.851	63.187	89.799	87.127
	90.091	88.915	60.064	88.623	90.323	67.007	83.892	88.363	98.748	107.905	88.8	88.912	87.509	90.134	71.776	88.791	101.12	89.659	75.04	89.925	85.915	93.079	84.221	109.54	93.451	77.54	66.309	91.628	92.655	95.243	89.962	89.554	89.971	85.771	74.308	89.285	89.52	73.197	88.497	90.425	96.504	86.535	82.194	90.463	87.585	90.851	63.187	89.799	87.127
	90.091	88.915	60.064	88.623	90.323	67.007	83.892	93.506	84.853	107.905	88.8	88.912	87.509	90.134	71.776	88.791	101.12	89.19	75.04	89.925	85.915	93.079	84.221	103.16	93.451	77.54	66.309	91.628	92.655	95.243	89.962	89.554	89.971	85.771	74.308	89.285	89.52	73.197	88.497	90.425	96.504	86.535	82.194	90.463	87.585	90.851	96.97	89.799	87.127
	90.091	88.915	60.064	88.623	90.323	67.007	83.892	93.506	84.853	107.905	88.8	88.912	87.509	90.134	71.776	88.791	96.235	89.19	75.04	89.925	85.915	93.079	84.221	103.16	85.716	77.54	66.309	91.628	72.089	95.243	89.962	89.554	89.971	85.771	74.308	88.698	89.52	73.197	88.497	90.425	96.504	86.535	82.194	90.463	87.585	90.851	96.97	89.799	87.127
	90.091	88.915	60.064	88.623	90.323	67.007	83.892	88.95	93.914	107.905	88.8	88.912	87.509	90.134	71.776	96.559	96.235	89.19	75.04	89.925	85.915	93.079	84.221	103.16	85.716	77.54	66.309	91.628	72.089	95.243	89.962	89.554	89.971	85.771	74.308	88.698	89.52	73.197	88.497	90.425	96.504	86.535	82.194	90.463	87.585	90.851	96.97	89.799	87.127
	90.091	88.915	62.974	88.623	90.323	67.007	83.892	88.95	93.914	107.905	88.8	88.912	90.792	90.134	71.776	96.559	96.235	89.19	75.04	89.925	91.371	93.079	84.221	103.16	86.881	77.54	66.309	91.628	91.808	95.243	89.962	89.867	89.971	98.442	74.308	88.698	89.52	73.197	88.497	90.425	96.504	86.535	82.194	90.463	87.585	90.851	96.97	89.799	87.127
	85.054	88.915	62.974	88.623	90.323	67.007	83.892	90	93.914	107.905	88.8	88.912	90.792	90.134	71.776	96.559	96.235	89.19	75.04	89.925	91.371	93.079	84.221	103.16	86.881	77.54	66.309	91.628	91.808	95.243	89.962	89.867	89.971	98.442	74.308	103.708	89.52	73.197	88.497	90.425	89.735	86.535	70.447	90.463	87.585	90.851	96.97	89.799	87.127
	85.054	88.915	54.275	88.623	90.323	67.007	83.892	90	93.914	107.905	88.8	88.912	90.792	90.134	71.776	96.559	96.235	89.19	75.04	89.925	91.371	93.079	84.221	103.16	86.881	77.54	66.309	91.628	91.808	95.243	89.962	89.867	89.971	98.442	74.308	103.708	89.52	73.197	88.497	90.425	89.735	86.535	70.447	90.463	87.585	90.851	96.97	89.799	87.127
	91.54	88.915	54.275	88.623	90.323	67.007	83.892	90	93.359	98.714	88.8	88.912	90.792	90.134	71.776	96.559	96.235	89.19	75.04	89.925	91.371	93.079	84.221	103.16	86.881	77.54	66.309	91.628	91.808	95.243	89.962	89.867	89.971	88.38	74.308	103.708	89.52	73.197	88.497	90.425	89.735	86.535	70.447	86.849	87.585	90.851	96.97	89.799	87.127
	91.54	88.915	54.889	88.623	90.323	67.007	83.892	90	93.359	98.714	88.8	88.912	90.792	90.134	71.776	98.577	96.235	89.19	75.04	89.925	91.371	93.079	84.221	103.16	90.152	77.54	66.309	91.628	91.808	95.243	89.962	89.867	89.971	88.38	74.308	103.708	89.52	73.197	88.497	90.425	89.735	86.535	70.447	86.849	87.585	90.851	96.97	89.799	87.127
	91.54	88.915	54.889	88.623	90.323	67.007	83.892	90	93.359	98.714	88.8	88.912	90.792	90.134	71.776	79.939	96.235	89.19	75.04	89.925	91.371	93.079	84.221	90.609	90.152	77.54	66.309	91.628	91.808	95.243	89.962	89.867	89.971	88.38	74.308	88.108	89.52	73.197	88.497	90.425	89.735	86.535	81.649	86.849	87.585	90.851	96.97	89.799	87.127
	91.54	88.915	54.889	88.623	90.323	67.007	83.892	90	101.163	98.714	88.8	88.912	90.792	90.134	71.776	79.939	96.235	89.19	75.04	89.925	93.497	93.079	84.221	90.609	90.152	73.724	83.587	91.628	91.808	95.243	84.09	89.867	89.971	88.38	74.308	88.108	89.52	73.197	88.497	90.425	89.735	86.535	81.649	86.849	87.585	90.851	96.97	89.799	87.127
	91.54	88.915	68.225	88.623	90.323	67.007	83.892	90.674	101.163	98.714	88.8	88.912	90.792	90.134	71.776	79.816	96.235	89.19	75.04	89.925	86.487	93.079	84.221	90.609	90.152	73.724	83.587	91.628	91.808	95.243	84.09	89.088	89.971	88.38	74.308	88.108	89.52	73.197	88.497	90.425	89.735	86.535	81.649	88.549	87.585	90.851	96.97	89.799	87.127
	91.54	88.915	68.225	88.623	90.323	67.007	83.892	90.674	101.163	98.714	88.8	88.912	90.792	90.134	71.776	79.816	96.235	89.19	75.04	89.925	86.487	93.079	84.221	90.609	90.152	73.724	85.098	91.628	91.808	93.704	84.09	89.088	89.971	88.38	74.308	88.108	89.52	73.197	88.497	90.425	89.735	86.535	81.649	88.549	87.585	90.851	96.97	89.799	87.127
	91.54	88.915	68.225	88.623	90.323	67.007	83.892	90.674	101.163	98.714	88.8	88.912	90.792	90.134	71.776	79.816	96.235	89.19	75.04	89.925	86.487	93.079	84.221	90.609	93.025	81.223	85.098	91.628	91.808	93.704	84.09	92.36	89.971	88.38	74.308	88.108	89.52	73.197	88.497	90.425	89.735	86.535	81.649	88.549	87.585	90.851	96.97	89.799	87.127
	91.54	88.915	68.225	88.623	90.323	67.007	82.774	90.674	101.163	98.714	88.8	88.912	90.792	90.134	71.776	96.721	96.235	89.19	75.04	89.925	86.487	93.079	84.221	90.609	93.025	81.223	85.098	91.628	91.808	93.704	84.09	92.36	89.971	88.38	74.308	88.108	89.52	73.197	88.497	90.425	89.735	86.535	81.649	88.549	87.585	90.851	96.97	89.799	87.127
	91.54	88.915	68.225	88.623	90.323	67.007	82.774	90.674	101.163	98.714	88.8	88.912	90.792	90.134	71.776	96.721	96.235	89.19	75.04	89.925	86.487	93.079	84.221	90.609	93.025	81.223	85.098	89.518	91.808	88.865	84.09	92.36	89.971	88.38	74.308	88.108	89.52	73.197	88.497	90.425	89.735	86.535	81.649	88.549	87.585	90.693	96.97	89.799	87.127
	91.54	88.915	68.225	88.623	90.323	67.007	82.774	88.128	101.056	98.714	88.8	88.912	90.792	90.134	76.106	96.721	96.235	89.19	75.04	89.925	86.487	93.079	84.221	90.609	93.025	81.223	90.584	89.518	91.808	88.865	84.09	92.36	89.971	88.38	72.453	88.108	89.52	73.197	88.497	90.425	89.735	86.535	81.649	88.549	87.585	90.693	96.97	89.799	87.127
	91.54	88.915	84.914	87.667	90.323	67.007	82.774	88.128	101.056	98.714	88.8	88.912	90.792	90.134	76.106	96.721	96.235	89.19	75.04	89.925	90.078	85.54	84.221	90.609	83.726	81.223	90.584	89.518	91.808	88.865	84.09	76.349	89.971	88.38	72.453	88.108	89.52	73.197	88.497	90.425	89.735	86.535	81.649	88.549	87.585	88.266	96.97	89.799	87.127
	91.54	88.915	84.914	87.667	90.323	67.007	82.774	88.128	101.056	79.508	88.8	88.912	90.792	90.134	76.106	91.804	96.235	89.19	75.04	89.925	90.078	85.54	84.221	90.609	83.726	81.223	80.603	89.518	91.808	88.865	84.09	76.349	89.971	88.38	72.453	88.108	89.52	73.197	88.497	90.425	89.735	86.535	81.649	88.549	87.585	88.266	96.97	89.799	87.127
	91.54	88.915	84.914	94.664	90.323	67.007	82.774	90.856	101.056	79.508	88.8	88.912	90.792	90.134	76.106	91.804	96.235	89.19	69.919	89.925	90.078	85.54	84.221	90.609	88.99	81.223	80.603	89.518	91.808	88.865	84.09	76.349	89.971	88.38	72.453	88.108	89.52	73.197	88.497	90.425	89.735	86.535	81.649	88.549	87.585	88.266	96.97	89.799	87.127
	91.54	88.915	84.914	94.664	90.323	67.007	82.774	90.856	101.056	79.508	88.8	88.912	90.792	90.134	76.106	91.804	96.235	89.19	69.919	89.925	90.078	85.54	84.221	98.731	88.99	81.223	80.603	89.518	91.808	88.865	90.539	90.899	89.971	78.237	72.453	88.108	89.52	73.197	88.497	90.425	89.735	86.535	81.649	88.549	87.585	88.266	96.97	89.799	87.127
	91.54	88.915	84.914	94.664	90.323	67.007	82.774	90.856	101.056	79.508	88.8	88.912	90.792	90.134	67.503	78.287	96.235	89.19	69.919	89.925	90.078	85.54	83.174	98.731	88.99	81.223	80.603	89.518	91.808	88.865	90.539	90.899	89.971	78.237	72.453	88.108	89.52	73.197	88.497	90.425	89.735	86.535	81.649	88.549	87.585	86.054	97.671	90.845	87.127
	91.54	88.915	84.914	94.664	90.323	67.007	82.774	90.856	101.056	79.508	88.8	88.912	90.792	90.134	67.503	78.287	96.235	89.19	80.135	89.925	90.078	85.54	83.174	98.731	87.593	81.223	80.603	89.518	91.808	88.865	90.539	90.899	89.971	78.237	72.453	88.108	89.52	73.197	88.497	90.425	89.735	86.535	81.649	88.549	87.585	86.054	97.671	90.845	87.127
	91.54	88.915	86.373	94.664	90.323	67.007	82.774	90.856	101.056	79.508	88.8	88.912	90.792	90.134	67.503	78.287	96.235	89.19	80.135	89.925	92.689	85.54	83.174	97.728	87.593	81.223	80.603	89.518	91.808	88.865	90.539	90.899	89.971	78.237	72.453	88.108	89.52	73.197	88.497	90.425	89.735	86.535	81.649	90.645	87.585	86.054	97.671	90.845	87.127
	91.54	88.915	86.373	94.664	90.323	67.007	82.774	90.856	101.056	79.508	88.8	88.912	90.792	90.134	67.503	78.287	96.235	89.19	80.135	89.925	92.689	85.54	83.174	97.728	87.593	81.223	80.603	89.518	91.808	88.865	90.539	90.899	89.971	78.237	72.453	88.108	89.52	73.197	88.497	90.425	89.735	86.535	81.649	90.645	87.585	86.054	97.671	90.845	87.127
[truncated: 19,036 more rows]
[truncated: 3 more columns]
