# Supplementary material for: Tracking multiple conformations occurring on angstrom-and-millisecond scales in single amino-acid-transporter molecules
Source: eLife. 2023 Feb 17;12:e82175. doi: 10.7554/eLife.82175 (PMC9937647; doi:10.7554/eLife.82175)
Supplement: Figure 5—source data 3. [file elife-82175-fig5-data3.xlsx]

## Sheet: Sheet1
3D histograms for theta and phi, for [Arg] = 0 mM for states 1-4
		state 1
		phi
theta		-21	-15	-9	-3	3	9	15	21	27	33	39	45	51	57	63	69	75	81	87	93	99
	39	0	0	0	0	0	0	0	0	0	0	0	0	0	0	0	0	0	0	0	0	0
	45	0	0	0	0	0	0	0	0	0	0	0	0	0	0	0	0	0	0	0	0	0
	51	0	0	0	0	0	0	0	0	0	0	0	0	0	0	0	0	0	0	0	0	0
	57	0	0	0	0	0	0	0	0	0	0	0	0	0	0	0	0	0	0	0	0	0
	63	0	0	0	0	0	0	0	0	0	0	0	0	0	0	0	0	0	0	0	0	0
	69	9.428*10^-6	1.414*10^-5	3.3*10^-5	3.3*10^-5	0	0	0	0	0	0	0	0	0	0	0	0	0	0	0	0	0
	75	5.657*10^-5	1.886*10^-5	5.657*10^-5	1.414*10^-4	2.263*10^-4	6.128*10^-5	0	0	0	0	0	0	0	0	0	0	0	0	0	0	0
	81	9.428*10^-6	9.428*10^-5	2.404*10^-4	7.825*10^-4	1.061*10^-3	1.98*10^-4	0	0	0	0	0	0	0	0	0	0	0	0	0	0	0
	87	7.071*10^-5	1.65*10^-4	7.354*10^-4	4.705*10^-3	7.755*10^-3	1.018*10^-3	9.428*10^-6	0	0	0	0	0	0	0	0	0	0	0	0	0	0
	93	4.714*10^-6	2.357*10^-4	9.664*10^-4	5.685*10^-3	6.194*10^-3	8.768*10^-4	0	0	0	0	0	0	0	0	0	0	0	0	0	0	0
	99	0	5.657*10^-5	1.509*10^-4	1.113*10^-3	4.667*10^-4	3.771*10^-5	0	0	0	0	0	0	0	0	0	0	0	0	0	0	0
	105	0	0	5.185*10^-5	2.451*10^-4	1.886*10^-4	5.185*10^-5	9.428*10^-6	0	0	0	0	0	0	0	0	0	0	0	0	0	0
	111	0	4.714*10^-6	4.243*10^-5	9.428*10^-5	1.886*10^-5	0	0	0	0	0	0	0	0	0	0	0	0	0	0	0	0
	117	0	0	0	4.714*10^-5	1.414*10^-5	0	0	0	0	0	0	0	0	0	0	0	0	0	0	0	0
	123	0	0	0	0	0	0	0	0	0	0	0	0	0	0	0	0	0	0	0	0	0
	129	0	0	0	0	9.428*10^-6	0	0	0	0	0	0	0	0	0	0	0	0	0	0	0	0
	135	0	0	0	0	0	0	0	0	0	0	0	0	0	0	0	0	0	0	0	0	0
	141	0	0	0	0	0	0	0	0	0	0	0	0	0	0	0	0	0	0	0	0	0
	147	0	0	0	0	0	0	0	0	0	0	0	0	0	0	0	0	0	0	0	0	0
	153	0	0	0	0	0	0	0	0	0	0	0	0	0	0	0	0	0	0	0	0	0
	159	0	0	0	0	0	0	0	0	0	0	0	0	0	0	0	0	0	0	0	0	0
		state 2
		phi
theta		-21	-15	-9	-3	3	9	15	21	27	33	39	45	51	57	63	69	75	81	87	93	99
	39	0	0	0	1.886*10^-5	9.428*10^-6	0	0	0	0	0	0	0	0	0	0	0	0	0	0	0	0
	45	0	0	0	0	0	0	0	0	1.603*10^-4	0	0	0	0	0	0	0	0	0	0	0	0
	51	3.3*10^-5	0	0	0	0	9.428*10^-5	1.414*10^-5	1.98*10^-4	7.071*10^-5	0	0	0	0	0	0	0	0	0	0	0	0
	57	0	4.714*10^-6	0	0	0	3.3*10^-5	9.9*10^-5	1.838*10^-4	1.461*10^-4	0	0	0	0	0	0	0	0	0	0	0	0
	63	0	0	0	4.714*10^-5	9.428*10^-6	7.071*10^-5	9.428*10^-6	0	1.886*10^-5	0	0	0	0	0	0	0	0	0	0	0	0
	69	0	0	0	2.97*10^-4	3.338*10^-3	9.381*10^-4	1.98*10^-4	1.084*10^-4	3.771*10^-5	0	9.428*10^-6	0	0	0	0	0	0	0	0	0	0
	75	2.357*10^-5	0	2.31*10^-4	1.098*10^-3	2.385*10^-3	1.758*10^-3	1.174*10^-3	6.458*10^-4	2.781*10^-4	0	0	0	0	0	0	0	0	0	0	0	0
	81	1.414*10^-5	0	4.243*10^-5	1.461*10^-4	1.278*10^-3	3.583*10^-3	8.056*10^-3	2.018*10^-3	1.447*10^-3	1.32*10^-4	0	0	0	0	0	0	0	0	0	0	0
	87	0	0	2.828*10^-5	0	7.543*10^-5	6.675*10^-3	0.01	6.444*10^-3	2.451*10^-3	2.64*10^-4	3.771*10^-5	0	0	0	0	0	0	0	0	0	0
	93	0	0	0	0	0	3.554*10^-3	8.891*10^-3	4.408*10^-3	2.494*10^-3	4.808*10^-4	3.3*10^-5	0	0	0	0	0	0	0	0	0	0
	99	0	0	0	0	5.657*10^-5	9.145*10^-4	2.084*10^-3	9.24*10^-4	3.017*10^-4	1.556*10^-4	9.428*10^-6	0	0	0	0	0	0	0	0	0	0
	105	0	0	0	0	0	1.179*10^-4	9.9*10^-5	3.536*10^-4	6.6*10^-5	1.414*10^-5	0	9.428*10^-6	0	0	0	0	0	0	0	0	0
	111	0	0	0	0	0	1.886*10^-5	0	0	4.714*10^-6	0	0	0	0	0	0	0	0	0	0	0	0
	117	0	0	0	0	4.714*10^-6	0	1.414*10^-5	6.128*10^-5	0	9.428*10^-6	0	0	0	0	0	0	0	0	0	0	0
	123	0	0	0	1.886*10^-5	0	0	2.357*10^-5	0	0	0	0	0	0	0	0	0	0	0	0	0	0
	129	0	0	0	0	0	0	0	0	0	0	0	0	0	0	0	0	0	0	0	0	0
	135	0	0	0	0	0	0	0	0	0	0	0	0	0	0	0	0	0	0	0	0	0
	141	0	0	0	0	0	0	0	0	0	0	0	0	0	0	0	0	0	0	0	0	0
	147	0	0	0	0	0	0	0	0	0	0	0	0	0	0	0	0	0	0	0	0	0
	153	0	0	0	0	0	0	0	0	0	0	0	0	0	0	0	0	0	0	0	0	0
	159	0	0	0	0	0	0	0	0	0	0	0	0	0	0	0	0	0	0	0	0	0
		state 3
		phi
theta		-21	-15	-9	-3	3	9	15	21	27	33	39	45	51	57	63	69	75	81	87	93	99
	39	0	0	0	0	0	0	1.413*10^-5	0	1.413*10^-5	0	0	0	0	0	0	1.884*10^-5	0	0	0	0	0
	45	0	0	0	1.413*10^-5	0	0	0	6.594*10^-5	6.123*10^-5	1.884*10^-5	0	0	0	1.413*10^-4	0	0	0	0	0	0	0
	51	0	0	0	1.884*10^-5	0	1.743*10^-4	1.46*10^-4	1.413*10^-5	2.544*10^-4	1.46*10^-4	0	4.239*10^-5	0	0	0	0	0	0	0	0	0
	57	0	0	0	4.71*10^-5	6.123*10^-5	1.743*10^-4	5.181*10^-5	2.685*10^-4	2.779*10^-4	4.71*10^-5	1.601*10^-4	3.768*10^-5	1.696*10^-4	0	0	0	0	0	0	0	0
	63	0	0	0	0	3.203*10^-4	6.594*10^-5	3.156*10^-4	4.946*10^-4	9.562*10^-4	2.544*10^-4	7.065*10^-5	6.123*10^-5	3.297*10^-5	4.71*10^-6	4.239*10^-5	0	0	0	0	0	0
	69	0	0	0	2.496*10^-4	3.297*10^-5	6.217*10^-4	8.054*10^-4	7.725*10^-4	1.357*10^-3	6.736*10^-4	1.686*10^-3	3.203*10^-4	2.355*10^-5	0	9.42*10^-6	0	0	0	0	0	0
	75	0	0	0	0	3.486*10^-4	3.438*10^-4	3.043*10^-3	1.884*10^-3	2.223*10^-3	1.691*10^-3	9.939*10^-4	4.051*10^-4	9.42*10^-6	0	0	0	0	0	0	0	0
	81	0	0	0	0	0	6.217*10^-4	1.691*10^-3	2.223*10^-3	1.319*10^-3	6.877*10^-4	8.007*10^-5	2.025*10^-4	0	7.536*10^-5	4.71*10^-6	0	0	0	0	0	0
	87	0	0	0	0	0	6.594*10^-5	2.12*10^-4	1.003*10^-3	2.365*10^-3	4.946*10^-4	0	9.42*10^-6	0	0	0	0	0	0	0	0	0
	93	0	0	0	0	0	8.478*10^-5	1.978*10^-4	5.652*10^-5	0	0	0	0	0	0	0	0	0	0	0	0	0
	99	0	0	0	0	0	0	0	7.065*10^-5	0	1.413*10^-5	0	0	0	2.072*10^-4	0	0	0	0	0	0	0
	105	0	0	0	0	0	2.355*10^-5	0	2.826*10^-5	0	0	0	0	0	0	0	0	0	0	0	0	0
	111	0	0	0	0	0	0	0	0	0	0	0	0	0	0	0	0	0	0	0	0	0
	117	0	0	0	0	0	0	0	0	0	0	0	0	0	0	0	0	0	0	0	0	0
	123	0	0	0	0	0	0	0	0	0	0	0	0	0	0	0	0	0	0	0	0	0
	129	0	0	0	0	0	0	0	0	0	0	0	0	0	0	0	0	0	0	0	0	0
	135	0	0	0	0	0	0	0	0	0	0	0	0	0	0	0	0	0	0	0	0	0
	141	0	0	0	0	0	0	0	0	0	0	0	0	0	0	0	0	0	0	0	0	0
	147	0	0	0	0	0	0	0	0	0	0	0	0	0	0	0	0	0	0	0	0	0
	153	0	0	0	0	0	0	0	0	0	0	0	0	0	0	0	0	0	0	0	0	0
	159	0	0	0	0	0	0	0	0	0	0	0	0	0	0	0	0	0	0	0	0	0
		state 4
		phi
theta		-21	-15	-9	-3	3	9	15	21	27	33	39	45	51	57	63	69	75	81	87	93	99
	39	0	0	0	0	0	0	0	0	0	0	0	0	0	0	0	0	0	0	0	0	0
	45	0	0	0	0	0	0	0	0	0	0	0	0	0	0	0	0	0	0	0	0	0
	51	0	0	0	0	0	0	0	0	0	0	0	0	0	0	0	0	0	0	0	0	0
	57	0	0	0	0	0	0	0	0	0	0	0	0	0	0	0	0	0	0	0	0	0
	63	0	0	0	0	0	0	0	0	0	0	0	0	0	0	1.414*10^-5	0	0	0	0	0	0
	69	0	0	0	0	0	0	0	0	0	0	0	1.414*10^-5	0	9.428*10^-6	1.414*10^-5	0	0	0	0	0	0
	75	0	0	0	0	0	0	0	0	1.414*10^-5	0	1.414*10^-5	1.226*10^-4	6.6*10^-5	0	0	0	1.414*10^-5	0	0	0	0
	81	0	0	0	0	0	0	2.357*10^-5	5.185*10^-5	1.414*10^-4	1.791*10^-4	3.206*10^-4	2.97*10^-4	2.876*10^-4	4.714*10^-5	9.9*10^-5	1.367*10^-4	1.98*10^-4	0	0	0	0
	87	0	0	0	0	0	0	2.828*10^-5	3.017*10^-4	2.065*10^-3	1.636*10^-3	1.136*10^-3	9.947*10^-4	3.394*10^-4	1.933*10^-4	2.357*10^-5	4.384*10^-4	3.441*10^-4	0	0	0	0
	93	0	0	0	0	0	0	8.014*10^-5	3.677*10^-4	1.023*10^-3	8.674*10^-4	1.216*10^-3	5.185*10^-4	2.64*10^-4	3.913*10^-4	1.886*10^-4	1.886*10^-5	1.037*10^-4	0	0	0	0
	99	0	0	0	0	0	0	0	1.414*10^-5	1.886*10^-4	3.913*10^-4	3.441*10^-4	2.687*10^-4	1.98*10^-4	3.771*10^-5	9.428*10^-6	2.357*10^-5	0	0	0	0	0
	105	0	0	0	0	0	0	0	1.886*10^-5	9.428*10^-6	6.128*10^-5	8.014*10^-5	1.461*10^-4	2.357*10^-5	9.428*10^-6	0	0	0	0	0	0	0
	111	0	0	0	0	0	0	0	1.414*10^-5	0	3.3*10^-5	7.071*10^-5	0	0	9.428*10^-6	9.428*10^-6	0	0	0	0	0	0
	117	0	0	0	0	0	0	0	0	0	0	0	0	0	1.886*10^-5	0	8.957*10^-5	0	0	0	0	0
	123	0	0	0	0	0	0	0	0	0	0	0	0	0	0	0	0	0	0	0	0	0
	129	0	0	0	0	0	0	0	0	0	0	0	0	0	0	0	0	0	0	0	0	0
	135	0	0	0	0	0	0	0	0	0	0	0	0	0	0	0	0	0	0	0	0	0
	141	0	0	0	0	0	0	0	0	0	0	0	0	0	0	0	0	0	0	0	0	0
	147	0	0	0	0	0	0	0	0	0	0	0	0	0	0	0	0	0	0	0	0	0
	153	0	0	0	0	0	0	0	0	0	0	0	0	0	0	0	0	0	0	0	0	0
	159	0	0	0	0	0	0	0	0	0	0	0	0	0	0	0	0	0	0	0	0	0
