# Supplementary material for: Tracking multiple conformations occurring on angstrom-and-millisecond scales in single amino-acid-transporter molecules
Source: eLife. 2023 Feb 17;12:e82175. doi: 10.7554/eLife.82175 (PMC9937647; doi:10.7554/eLife.82175)
Supplement: Figure 5—source data 4. [file elife-82175-fig5-data4.xlsx]

## Sheet: Sheet1
3D histograms for theta and phi, for [Arg] = 0.75 mM for states 1-4
		state 1
		phi
theta		-21	-15	-9	-3	3	9	15	21	27	33	39	45	51	57	63	69	75	81	87	93	99
	39	0	0	0	0	0	0	0	0	0	0	0	0	0	0	0	0	0	0	0	0	0
	45	0	0	0	0	0	0	0	0	0	0	0	0	0	0	0	0	0	0	0	0	0
	51	0	0	0	0	0	0	0	0	0	0	0	0	0	0	0	0	0	0	0	0	0
	57	0	0	0	0	0	0	0	0	0	0	0	0	0	0	0	0	0	0	0	0	0
	63	0	0	0	0	0	0	0	0	0	0	0	0	0	0	0	0	0	0	0	0	0
	69	0	1.751*10^-5	0	0	0	0	0	0	0	0	0	0	0	0	0	0	0	0	0	0	0
	75	0	2.626*10^-5	0	2.188*10^-4	7.878*10^-5	2.626*10^-5	0	0	0	0	0	0	0	0	0	0	0	0	0	0	0
	81	0	2.626*10^-5	1.313*10^-4	4.289*10^-4	1.751*10^-4	8.753*10^-5	0	0	0	0	0	0	0	0	0	0	0	0	0	0	0
	87	0	0	5.252*10^-5	6.819*10^-3	4.324*10^-3	2.451*10^-4	0	0	0	0	0	0	0	0	0	0	0	0	0	0	0
	93	1.751*10^-5	0	3.414*10^-4	0.012	4.201*10^-3	5.952*10^-4	0	0	0	0	0	0	0	0	0	0	0	0	0	0	0
	99	0	0	7.002*10^-5	8.49*10^-4	2.188*10^-4	6.127*10^-5	0	0	0	0	0	0	0	0	0	0	0	0	0	0	0
	105	0	0	0	1.488*10^-4	0	0	0	0	0	0	0	0	0	0	0	0	0	0	0	0	0
	111	0	0	0	3.501*10^-5	7.002*10^-5	0	0	0	0	0	0	0	0	0	0	0	0	0	0	0	0
	117	0	0	0	0	0	0	0	0	0	0	0	0	0	0	0	0	0	0	0	0	0
	123	0	0	0	0	0	0	0	0	0	0	0	0	0	0	0	0	0	0	0	0	0
	129	0	0	0	0	0	0	0	0	0	0	0	0	0	0	0	0	0	0	0	0	0
	135	0	0	0	0	0	0	0	0	0	0	0	0	0	0	0	0	0	0	0	0	0
	141	0	0	0	0	0	0	0	0	0	0	0	0	0	0	0	0	0	0	0	0	0
	147	0	0	0	0	0	0	0	0	0	0	0	0	0	0	0	0	0	0	0	0	0
	153	0	0	0	0	0	0	0	0	0	0	0	0	0	0	0	0	0	0	0	0	0
	159	0	0	0	0	0	0	0	0	0	0	0	0	0	0	0	0	0	0	0	0	0
		state 2
		phi
theta		-21	-15	-9	-3	3	9	15	21	27	33	39	45	51	57	63	69	75	81	87	93	99
	39	0	0	0	0	0	0	0	0	0	0	0	0	0	0	0	0	0	0	0	0	0
	45	0	0	0	0	0	0	0	0	0	0	0	0	0	0	0	0	0	0	0	0	0
	51	0	0	0	0	0	0	0	0	0	0	0	0	0	0	0	0	0	0	0	0	0
	57	0	0	0	0	0	0	0	0	0	0	0	0	0	0	0	0	0	0	0	0	0
	63	0	0	0	0	0	0	0	2.713*10^-4	0	0	0	0	0	0	0	0	0	0	0	0	0
	69	0	0	0	0	0	0	2.013*10^-4	7.002*10^-5	0	1.751*10^-4	0	0	0	0	0	0	0	0	0	0	0
	75	0	0	0	0	0	1.751*10^-5	2.258*10^-3	8.14*10^-4	4.114*10^-4	0	0	0	0	0	0	0	0	0	0	0	0
	81	0	0	0	0	0	2.626*10^-4	2.337*10^-3	2.871*10^-3	8.578*10^-4	1.926*10^-4	2.101*10^-4	0	0	0	0	0	0	0	0	0	0
	87	0	0	0	0	3.851*10^-4	7.142*10^-3	7.23*10^-3	4.972*10^-3	2.048*10^-3	7.265*10^-4	5.252*10^-5	0	0	0	0	0	0	0	0	0	0
	93	0	0	0	0	5.427*10^-4	3.247*10^-3	6.477*10^-3	3.816*10^-3	1.313*10^-4	1.751*10^-5	0	0	0	0	0	0	0	0	0	0	0
	99	0	0	0	0	2.626*10^-5	1.663*10^-4	1.943*10^-3	6.565*10^-4	7.878*10^-5	0	0	0	0	0	0	0	0	0	0	0	0
	105	0	0	0	0	0	2.626*10^-5	0	5.252*10^-4	2.626*10^-5	0	0	0	0	0	0	0	0	0	0	0	0
	111	0	0	0	0	0	5.252*10^-5	0	0	0	0	0	0	0	0	0	0	0	0	0	0	0
	117	0	0	0	0	0	0	0	0	0	0	0	0	0	0	0	0	0	0	0	0	0
	123	0	0	0	0	0	0	0	0	0	0	0	0	0	0	0	0	0	0	0	0	0
	129	0	0	0	0	0	0	0	0	0	0	0	0	0	0	0	0	0	0	0	0	0
	135	0	0	0	0	0	0	0	0	0	0	0	0	0	0	0	0	0	0	0	0	0
	141	0	0	0	0	0	0	0	0	0	0	0	0	0	0	0	0	0	0	0	0	0
	147	0	0	0	0	0	0	0	0	0	0	0	0	0	0	0	0	0	0	0	0	0
	153	0	0	0	0	0	0	0	0	0	0	0	0	0	0	0	0	0	0	0	0	0
	159	0	0	0	0	0	0	0	0	0	0	0	0	0	0	0	0	0	0	0	0	0
		state 3
		phi
theta		-21	-15	-9	-3	3	9	15	21	27	33	39	45	51	57	63	69	75	81	87	93	99
	39	0	0	0	0	0	0	0	0	0	0	0	0	3.501*10^-5	0	0	0	0	0	0	0	0
	45	0	0	0	0	0	0	0	0	0	0	6.127*10^-5	0	0	0	0	0	0	0	0	0	0
	51	0	0	0	0	0	0	0	0	3.589*10^-4	0	0	0	0	0	0	0	0	0	0	0	0
	57	0	0	0	0	9.628*10^-5	0	0	0	5.514*10^-4	0	0	0	0	0	0	0	0	0	0	0	0
	63	0	0	0	0	0	1.488*10^-4	1.488*10^-4	3.501*10^-5	9.628*10^-5	6.127*10^-5	0	0	0	0	0	0	0	0	0	0	0
	69	0	0	0	0	0	2.188*10^-4	3.676*10^-4	2.626*10^-5	1.225*10^-3	1.313*10^-4	6.74*10^-4	1.138*10^-4	4.026*10^-4	0	0	0	0	0	0	0	0
	75	0	0	0	0	2.626*10^-5	1.751*10^-4	1.926*10^-4	1.059*10^-3	1.26*10^-3	7.177*10^-4	2.101*10^-4	2.626*10^-4	0	0	0	0	0	0	0	0	0
	81	0	0	0	0	0	3.851*10^-4	7.002*10^-4	8.928*10^-4	1.637*10^-3	2.232*10^-3	1.059*10^-3	6.127*10^-4	0	0	0	0	0	0	0	0	0
	87	0	0	0	0	0	2.976*10^-4	4.902*10^-4	1.681*10^-3	4.394*10^-3	6.267*10^-3	6.854*10^-3	0	0	0	0	0	0	0	0	0	0
	93	0	0	0	0	0	0	0	4.447*10^-3	6.442*10^-3	3.352*10^-3	3.239*10^-4	4.814*10^-4	0	0	0	0	0	0	0	0	0
	99	0	0	0	0	0	0	0	9.628*10^-5	1.05*10^-4	1.751*10^-4	2.013*10^-4	1.926*10^-4	0	0	0	0	0	0	0	0	0
	105	0	0	0	0	0	0	0	0	0	0	0	0	0	0	0	0	0	0	0	0	0
	111	0	0	0	0	0	0	0	0	0	0	0	0	0	0	0	0	0	0	0	0	0
	117	0	0	0	0	0	0	0	0	0	0	0	0	0	0	0	0	0	0	0	0	0
	123	0	0	0	0	0	0	0	0	0	0	0	0	0	0	0	0	0	0	0	0	0
	129	0	0	0	0	0	0	0	0	0	0	0	0	0	0	0	0	0	0	0	0	0
	135	0	0	0	0	0	0	0	0	0	0	0	0	0	0	0	0	0	0	0	0	0
	141	0	0	0	0	0	0	0	0	0	0	0	0	0	0	0	0	0	0	0	0	0
	147	0	0	0	0	0	0	0	0	0	0	0	0	0	0	0	0	0	0	0	0	0
	153	0	0	0	0	0	0	0	0	0	0	0	0	0	0	0	0	0	0	0	0	0
	159	0	0	0	0	0	0	0	0	0	0	0	0	0	0	0	0	0	0	0	0	0
		state 4
		phi
theta		-21	-15	-9	-3	3	9	15	21	27	33	39	45	51	57	63	69	75	81	87	93	99
	39	0	0	0	0	0	0	0	0	0	0	0	0	0	0	0	0	0	0	0	0	0
	45	0	0	0	0	0	0	0	0	0	0	0	0	0	0	0	0	0	0	0	0	0
	51	0	0	0	0	0	0	0	0	0	0	0	0	0	0	0	0	0	0	0	0	0
	57	0	0	0	0	0	0	0	0	0	0	0	0	0	0	0	0	0	0	0	0	0
	63	0	0	0	0	0	0	0	0	0	0	0	0	0	0	0	0	0	0	0	0	0
	69	0	0	0	0	0	0	0	0	0	0	0	0	0	0	0	0	0	0	0	0	0
	75	0	0	0	0	0	0	0	0	0	3.501*10^-5	1.751*10^-5	1.751*10^-5	0	4.377*10^-5	5.252*10^-5	0	0	0	0	0	0
	81	0	0	0	0	0	0	0	0	8.753*10^-5	3.851*10^-4	2.101*10^-4	5.689*10^-4	3.414*10^-4	1.138*10^-4	1.313*10^-4	0	0	0	0	0	0
	87	0	0	0	0	0	0	0	4.114*10^-4	3.589*10^-4	2.083*10^-3	3.326*10^-3	2.206*10^-3	1.672*10^-3	1.794*10^-3	1.751*10^-4	0	0	0	0	0	0
	93	0	0	0	0	0	0	0	6.652*10^-4	3.414*10^-3	1.803*10^-3	2.897*10^-3	4.342*10^-3	3.37*10^-3	4.902*10^-4	0	0	0	0	0	0	0
	99	0	0	0	0	0	0	0	0	0	2.713*10^-4	9.628*10^-5	3.851*10^-4	2.188*10^-4	0	2.626*10^-5	0	0	0	0	0	0
	105	0	0	0	0	0	0	0	0	0	4.377*10^-5	5.252*10^-5	9.628*10^-5	0	0	0	0	0	0	0	0	0
	111	0	0	0	0	0	0	0	0	0	0	0	0	0	0	0	0	0	0	0	0	0
	117	0	0	0	0	0	0	0	0	0	0	0	4.377*10^-5	0	0	0	0	0	2.626*10^-5	0	0	0
	123	0	0	0	0	0	0	0	0	0	0	0	0	0	0	5.252*10^-5	0	0	0	0	0	0
	129	0	0	0	0	0	0	0	0	0	0	0	0	0	0	0	0	0	0	0	0	0
	135	0	0	0	0	0	0	0	0	0	0	0	0	0	0	0	0	0	0	0	0	0
	141	0	0	0	0	0	0	0	0	0	0	0	0	0	0	0	0	0	0	0	0	0
	147	0	0	0	0	0	0	0	0	0	0	0	0	0	0	0	0	0	0	0	0	0
	153	0	0	0	0	0	0	0	0	0	0	0	0	0	0	0	0	0	0	0	0	0
	159	0	0	0	0	0	0	0	0	0	0	0	0	0	0	0	0	0	0	0	0	0
