# Supplementary material for: Tracking multiple conformations occurring on angstrom-and-millisecond scales in single amino-acid-transporter molecules
Source: eLife. 2023 Feb 17;12:e82175. doi: 10.7554/eLife.82175 (PMC9937647; doi:10.7554/eLife.82175)
Supplement: Figure 6—source data 1. [file elife-82175-fig6-data1.xlsx]

## Sheet: Sheet1
[Arg]		Average theta (local frame of reference)					standard deviation of theta					Average phi (local frame of reference)					standard deviation of phi
		state 1	state 2	state 3	state 4		state 1	state 2	state 3	state 4		state 1	state 2	state 3	state 4		state 1	state 2	state 3	state 4
0		90.002	85.555	75.547	90.007		4.881	8.04	9.189	5.859		-0.008	14.299	24.826	39.535		4.277	6.983	9.895	12.648
0.002		89.999	86.823	79.765	90.002		4.118	7.288	9	4.67		-0.005	14.996	26.612	38.545		3.699	8.946	9.86	11.491
0.005		90.002	88.509	76.048	90.002		5.089	6.986	8.61	4.908		-0.011	16.451	27.216	38.673		4.101	6.267	9.52	9.724
0.01		90	89.627	76.626	90		5.497	7.875	9.401	4.85		-0.009	17.494	26.648	37.538		4.964	6.737	8.658	10.179
0.02		90.002	90.78	76.675	90.001		5.907	6.573	9.943	4.793		-0.005	16.694	27.795	41.2		4.175	6.99	9.556	10.469
0.05		90.004	90.871	75.538	90.007		4.828	5.772	9.803	4.663		-0.005	16.151	25.304	35.189		4.119	6.491	9.936	8.885
0.1		90	89.198	79.423	90.003		3.725	7.148	9.592	4.559		-0.003	18.378	30.988	43.392		3.715	7.208	9.554	10.463
0.2		90	87.015	75.117	89.999		4.365	9.041	10.71	4.117		0.002	20.521	29.791	40.676		4.051	8.045	10.717	9.926
0.5		89.998	88.571	76.585	90.002		3.481	7.781	7.436	3.997		-0.003	17.991	32.038	41.782		3.137	7.019	11.181	12.355
0.75		90.001	87.91	85.155	90.005		3.68	6.44	8.404	4.171		-0.001	16.595	29.375	40.964		2.821	5.892	7.565	9.614
1		90.001	87.841	78.693	90.001		4.365	7.658	7.835	3.007		-0.005	17.071	25.855	33.053		3.633	7.342	12.452	15.616
3		90.002	86.858	82.337	89.999		4.848	6.064	7.632	3.164		-0.005	15.31	23.991	33.737		4.159	5.234	7.569	12.001
5		90.002	87.304	80.473	90.001		3.934	6.205	8.987	3.413		-0.001	16.68	24.687	36.686		2.956	7.645	13.392	13.741
