# Supplementary material for: Tracking multiple conformations occurring on angstrom-and-millisecond scales in single amino-acid-transporter molecules
Source: eLife. 2023 Feb 17;12:e82175. doi: 10.7554/eLife.82175 (PMC9937647; doi:10.7554/eLife.82175)
Supplement: Figure 8—source data 1. [file elife-82175-fig8-data1.xlsx]

## Sheet: Sheet1
Table 1: Orientations of the four conformational states of AdiC, or AdiC-like, from crystallography or polarization measurements
	Angle q
			qIx		qIo		qEo		qEx
	Crystallography		93.8°		83.6°		71.7°		95.3°
			q1		q2		q3		q4
	Polarization		90°±4.7°		87.8°±7.2°		76.6°±9.0°		90°±4.5°
	Angle φ
			fIx		fIo		fEo		fEx
	Crystallography		0°		19.8°		27.2°		36.9°
			f1		f2		f3		f4
	Polarization		0°±4.0°		16.6°±7.2°		26.6°±10.0°		38.5°±11°
