# Supplementary material for: Tracking multiple conformations occurring on angstrom-and-millisecond scales in single amino-acid-transporter molecules
Source: eLife. 2023 Feb 17;12:e82175. doi: 10.7554/eLife.82175 (PMC9937647; doi:10.7554/eLife.82175)
Supplement: Figure 8—source data 2. [file elife-82175-fig8-data2.xlsx]

## Sheet: Sheet1
Table 2: Relative angle changes between four conformational states of AdiC or AdiC-like, from crystallography or polarization measurements
	State-to-state overall angle change, W
			W12		W13		W14
	Crystallography		24.9°		36.9°		39.7°
			W12		W13		W14
	Polarization		18.2°±7.1°		31.5°±9.6°		39.9°±10.0°
			W23		W24		W34
	Crystallography		13.8°		20.7°		25.4°
			W23		W24		W34
	Polarization		18.2°±7.7°		22.6°±9.0°		19.3°±°9.6
