# Supplementary material for: Tracking multiple conformations occurring on angstrom-and-millisecond scales in single amino-acid-transporter molecules
Source: eLife. 2023 Feb 17;12:e82175. doi: 10.7554/eLife.82175 (PMC9937647; doi:10.7554/eLife.82175)
Supplement: Figure 10—source data 1. [file elife-82175-fig10-data1.xlsx]

## Sheet: Sheet1
arginine dependent state probabilities for AdiC
	state probabilities					state probabilities S.E.M.
Arg	p1	p2	p3	p4		p1	p2	p3	p4
0	0.2103	0.4767	0.2111	0.1019		0.007381	0.009047	0.007392	0.00548
0.002	0.2059	0.4733	0.1851	0.1357		0.007281	0.008991	0.006994	0.006167
0.005	0.172	0.4856	0.1849	0.1575		0.009237	0.012	0.009503	0.008917
0.01	0.1611	0.4847	0.1826	0.1716		0.007582	0.01	0.007968	0.007776
0.02	0.1942	0.4463	0.2101	0.1494		0.007915	0.009946	0.008151	0.007132
0.05	0.1493	0.3661	0.2644	0.2202		0.01	0.014	0.013	0.012
0.1	0.2176	0.3533	0.2003	0.2287		0.011	0.013	0.01	0.011
0.2	0.1656	0.3486	0.2586	0.2271		0.011	0.014	0.013	0.013
0.5	0.2062	0.2887	0.3226	0.1824		0.015	0.017	0.018	0.015
0.75	0.1971	0.3035	0.3079	0.1915		0.014	0.016	0.016	0.014
1	0.1601	0.3329	0.3181	0.1889		0.009487	0.012	0.012	0.01
3	0.1279	0.3313	0.3219	0.2189		0.008894	0.013	0.012	0.011
5	0.1739	0.3233	0.2993	0.2035		0.008767	0.011	0.011	0.009313
