# Supplementary material for: Tracking multiple conformations occurring on angstrom-and-millisecond scales in single amino-acid-transporter molecules
Source: eLife. 2023 Feb 17;12:e82175. doi: 10.7554/eLife.82175 (PMC9937647; doi:10.7554/eLife.82175)
Supplement: Figure 11—source data 1. — Table listing the inverse values of combined least-distance-squares of the different state combinations. [file elife-82175-fig11-data1.xlsx]

## Sheet: Sheet1
comparison and alignment of theta and phi from structure vs. polarization
	structure		polarization
	theta	phi	theta	phi
s1	95.204	-1.587	90	-0.005
s2	84.613	20.975	88.8	16.68
s3	72.693	28.121	77.4	26.612
s4	95.82	38.272	90	38.545
sequence id vs. inverse least squares
sequence id	inverse least squares	sequence
1	0.708	4	1	2	3
2	0.9	4	2	1	3
3	0.974	4	3	1	2
4	1.048	4	3	2	1
5	0.661	4	1	3	2
6	0.926	4	2	3	1
7	0.983	3	4	2	1
8	0.909	3	4	1	2
9	0.755	2	4	1	3
10	0.322	1	4	2	3
11	0.781	2	4	3	1
12	0.274	1	4	3	2
13	0.684	3	1	4	2
14	0.95	3	2	4	1
15	0.87	2	3	4	1
16	0.363	1	3	4	2
17	0.531	2	1	4	3
18	0.289	1	2	4	3
19	0.473	3	1	2	4
20	0.665	3	2	1	4
21	0.586	2	3	1	4
22	0.152	1	3	2	4
23	0.272	2	1	3	4
24	0.03	1	2	3	4
